# Supplementary material for: Discovery and characterisation of an amidine-containing ribosomally-synthesised peptide that is widely distributed in nature
Source: Royal Society of Chemistry journal article supplement (doi:10.1039/d1sc01456k), 2021-01-01
Supplement: d1sc01456k1.pdf [file d1sc01456k1.pdf]

## SUPPORTING INFORMATION

### Discovery and characterisation of an amidine-containing ribosomally-synthesised peptide that is widely distributed in nature

Alicia H. Russell, Natalia M. Vior, Edward S. Hems, Rodney Lacret and Andrew W. Truman\*

Department of Molecular Microbiology, John Innes Centre, Norwich, NR4 7UH, UK

#### CONTENTS

|                                                                                                 |    |
|-------------------------------------------------------------------------------------------------|----|
| <b>Materials and Methods</b> .....                                                              | 3  |
| <b>Table S1</b> Strains used in this study .....                                                | 11 |
| <b>Table S2</b> Plasmids used in this study .....                                               | 11 |
| <b>Table S3</b> Constructs generated in this study .....                                        | 12 |
| <b>Table S4</b> Media used in this study .....                                                  | 13 |
| <b>Table S5</b> Solutions used for TAR cloning .....                                            | 13 |
| <b>Table S6</b> Primers used in this study .....                                                | 14 |
| <b>Table S7</b> Accurate masses of streptomidine and related compounds .....                    | 16 |
| <b>Table S8</b> Proteins encoded in the streptomidine biosynthetic gene cluster .....           | 17 |
| <b>Figure S1</b> Precursor peptide networks associated with actinobacterial YcaO proteins ..... | 18 |
| <b>Figure S2</b> YcaO protein phylogenetic tree with branch lengths .....                       | 19 |
| <b>Figure S3</b> Alignment of precursor peptides containing motif A .....                       | 20 |
| <b>Figure S4</b> Alignment of precursor peptides containing motif B .....                       | 22 |
| <b>Figure S5</b> 80% identity networking of network 1 precursor peptides .....                  | 23 |
| <b>Figure S6</b> Phylogenetic tree of YcaO proteins associated with network 1 peptides .....    | 24 |
| <b>Figure S7</b> MultiGeneBlast analysis of streptomidine BGC .....                             | 25 |
| <b>Figure S8</b> Comparative analysis of LC-MS data .....                                       | 27 |
| <b>Figure S9</b> MS/MS fragmentation data for streptomidine and related compounds .....         | 28 |
| <b>Figure S10</b> MS/MS comparison between pCAPSalbC and <i>S. albidoflavus</i> .....           | 29 |
| <b>Figure S11</b> Structure of streptomidine with numbered atoms .....                          | 29 |
| <b>Table S9</b> NMR chemical shift assignments for streptomidine in DMSO- $d_6$ .....           | 30 |
| <b>Figure S12</b> NMR correlation data observed in 2D spectra .....                             | 31 |
| <b>Figure S13</b> $^1\text{H}$ NMR spectrum of streptomidine .....                              | 32 |
| <b>Figure S14</b> $^{13}\text{C}$ NMR spectrum of streptomidine .....                           | 32 |
| <b>Figure S15</b> 2D COSY spectrum of streptomidine .....                                       | 33 |
| <b>Figure S16</b> 2D HMBC spectrum of streptomidine .....                                       | 34 |
| <b>Figure S17</b> Selected regions of 2D HMBC spectrum .....                                    | 35 |
| <b>Figure S18</b> 2D HSQCed spectrum of streptomidine .....                                     | 36 |
| <b>Figure S19</b> 2D TOCSY spectrum of streptomidine .....                                      | 37 |
| <b>Figure S20</b> 2D HSQC-TOCSY spectrum of streptomidine .....                                 | 38 |
| <b>Figure S21</b> Marfey's analysis of streptomidine .....                                      | 39 |
| <b>Figure S22</b> NMR analysis of isomerisation .....                                           | 40 |
| <b>Figure S23</b> Match to the MS/MS spectrum of streptomidine identified using MASST .....     | 41 |

|                   |                                                                                             |    |
|-------------------|---------------------------------------------------------------------------------------------|----|
| <b>Table S10</b>  | Indicator strains tested in bioactivity assays .....                                        | 42 |
| <b>Figure S24</b> | LC-MS analysis of $\Delta amiE$ culture extract and synthetic <i>N</i> -acetylated LSA..... | 43 |
| <b>Figure S25</b> | MS/MS fragmentation data for predicted modified LSA compounds .....                         | 44 |
| <b>Figure S26</b> | Sequence alignment of YcaO proteins.....                                                    | 45 |
| <b>Figure S27</b> | Proposed mechanism of amidine ring formation in streptomidine .....                         | 46 |
| <b>Figure S28</b> | Mutation of AmiA core peptide .....                                                         | 47 |
| <b>Figure S29</b> | Secondary structure alignment of AmiE with McbC.....                                        | 48 |
| <b>References</b> | .....                                                                                       | 49 |

## MATERIALS AND METHODS

### Chemicals and media

Unless otherwise stated, all chemicals and media components were purchased from Sigma Aldrich, except for the following: agar (Melford), NaCl, glucose and sorbitol (Fisher Scientific), yeast extract (Merck), soy flour (Holland and Barrett) and peptone (BD Biosciences). Ultrapure water was obtained using a Milli-Q purification system (Merck). All media were autoclaved prior to use and chemical solutions were filter sterilised using a 0.22 µm syringe filter. All primers were ordered from Eurofins Genomics and purified by HPSF. *N*-acetyl-LSA was custom synthesised by Genscript.

### Strains and culture conditions

All strains, plasmids, culture media and primers used in this work are described in the Supporting Information (Tables S1-S6). Unless otherwise specified, all *Streptomyces* strains were grown at 28 °C on solid SFM for spore growth, solid SFM supplemented with 10 mM MgCl<sub>2</sub> for conjugations, liquid TSB for seed cultures and liquid SM12 media for fermentations. Other media used during screening trials include liquid R5, BPM and SM14. Liquid cultures were grown with shaking at 250 rpm. Spores and mycelium stocks were kept at -20 °C in 20% glycerol. *Saccharomyces cerevisiae* VL6-48N<sup>1</sup> was used for transformation-associated recombination (TAR) cloning and was grown at 30 °C with shaking at 250 rpm in YPD medium. Recombinant yeast selection was performed using selective media SD+CSM-Trp complemented with 5-fluorotic acid (Fluorochem, 1 mg mL<sup>-1</sup>). *Escherichia coli* DH5α was used for transformation and propagation of DNA plasmids. For gene deletions, *E. coli* DH5α BT340 was used for Flp-FRT recombination and *E. coli* BW25113/pIJ790 was used for Lambda-Red mediated recombination<sup>2</sup>. pIJ790-carrying strains were grown at 30 °C for plasmid replication, and Flp-FRT recombination was performed at 42 °C. *E. coli* ET12567/pR9604 and *E. coli* ET12567/pUZ8002 were used to transfer DNA to *Streptomyces* by intergeneric conjugation. All *E. coli* strains were grown in LB medium at 37 °C unless otherwise specified. *E. coli* hygromycin selection was performed in solid DNA media. *E. coli* cell stocks were kept at -20 °C in 20% glycerol. Antibiotic selection was carried out using the following final concentrations of antibiotic: kanamycin 50 µg mL<sup>-1</sup>, apramycin 50 µg mL<sup>-1</sup>, hygromycin 50 µg mL<sup>-1</sup>, nalidixic acid 25 µg mL<sup>-1</sup>, chloramphenicol 25 µg mL<sup>-1</sup> and carbenicillin 100 µg mL<sup>-1</sup>.

### Analysis of YcaO domain proteins

All actinobacterial standalone YcaO-domain proteins were identified in NCBI Genbank using CDART (Conserved Domain Architecture Retrieval Tool)<sup>3</sup> (2,574 proteins). These were filtered using EFI-EST<sup>4</sup> to 2,338 sequences after excluding proteins smaller than 350 AA, and further filtered to 1,514 proteins using a 95% identity cut-off. Corresponding accession numbers were submitted to Batch Entrez and the resulting sequence files aligned using MUSCLE<sup>5</sup> (version 3.8.31). This alignment was used to construct a maximum likelihood tree using RAxML<sup>6</sup> (version 8.2.12) on the CIPRES

Science Gateway (<https://www.phylo.org/>) with the following settings: raxmlHPC-HYBRID -T 4 -n result -s infile.txt -p 12345 -m PROTCATDAYHOFF -f a -N 100 -x 12345

The YcaO proteins associated with Network 1 (plus outgroup protein WP\_044386624.1) were aligned using MUSCLE. This alignment was used to construct a maximum likelihood tree using RAxML on the CIPRES Science Gateway with the following settings: raxmlHPC-HYBRID-AVX -T 4 -f a -N autoMRE -n result -s infile.txt -p 12345 -m PROTGAMMAWAGF -k -x 12345

The trees were visualised with the interactive Tree Of Life (iTOL)<sup>7</sup>.

### **Retrieval and analysis of precursor peptides and BGCs**

The 1,514 YcaO-domain protein accessions were used as the input for RiPPER<sup>8,9</sup> (<https://github.com/streptomyces/ripper>) with default settings. The resulting GenBank files are available to download online (DOI: 10.6084/m9.figshare.14191544). Some of the precursor peptide sequences obtained from RiPPER analysis were duplicated due to the presence of more than one YcaO protein in some BGCs, so 29 duplicated precursor sequences were manually removed prior to subsequent analysis. Peptide similarity networking of the precursor peptide sequences were created using EGN (Evolutionary Gene and genome Network)<sup>10</sup>, visualised with Cytoscape 2.8.3<sup>11</sup> and is provided as Supplementary Dataset 1. Multiple sequence alignments of precursor peptides were performed using ClustalW<sup>12</sup> via MEGA7<sup>13</sup> using default settings, and motifs were searched for using the MEME tool in the MEME suite<sup>14</sup> (<http://meme-suite.org/index.html>) using classic mode with the site distribution as Any Number of Repetitions and searching for 3 motifs. The captured genomic regions were visualised and analysed in Artemis<sup>15</sup> and Vector NTI<sup>16</sup>, and putative BGCs were compared using MultiGeneBlast<sup>17</sup> (<http://multigeneblast.sourceforge.net/>). Conserved protein domains were analysed using NCBI conserved domain search (<https://www.ncbi.nlm.nih.gov/Structure/cdd/wrpsb.cgi>) and Phyre2<sup>18</sup>. Network 1 peptides were tested with NeuRiPP using the Parallel CNN network architecture<sup>19</sup>.

Non-actinobacterial BGCs were identified by BLAST analysis (Expect threshold = 0.05) of AmiD (WP\_008409979.1) with actinobacterial proteins excluded from the results. RiPPER analysis identified related precursor peptides in the phylum Firmicutes. A firmicute YcaO protein (ETB73247.1, *Bacillus* sp. CPSM8) was then used for a further cycle of BLAST/RiPPER to assess for any additional related precursor peptides.

### **TAR cloning of *Streptomyces albidoflavus* J1074 gene cluster**

A vector to capture the gene cluster from *S. albidoflavus* J1074 genomic DNA was constructed by Gibson assembly between a linearised pCAP03 vector<sup>20</sup> and two single-strand oligonucleotides (Salb\_TAR\_fw and Salb\_TAR\_rv). The forward and reverse oligonucleotides had 34 and 36 nucleotide homology sequences with pCAP03 respectively. These were designed to generate a vector with 50 and 49 nucleotide homology sequences with upstream and downstream regions of

the gene cluster respectively, either side of an AvrII restriction site. pCAP03 was digested with XhoI and NdeI, and 100 ng linearised plasmid and 10 pmol of each oligonucleotide were incubated with 5  $\mu$ L ligase-free Gibson assembly reaction (100 mM Tris-HCl pH 7.5, 10 mM MgCl<sub>2</sub>, 0.2 mM each dNTPs, 10 mM DTT, 1 mM NAD, 5% PEG-8000, 0.1125 units T5 exonuclease, 0.375 units Phusion polymerase, 10  $\mu$ L total reaction volume) and incubated at 50 °C for 2 hours in a BioRad T100 ThermoCycler. 10  $\mu$ L assembly reaction was then transformed into *E. coli* DH5 $\alpha$  by chemical transformation selected with kanamycin. Colonies containing the correct capture vector were identified by PCR using primers pCAP\_sp and pCAP\_asp, and the plasmid was isolated using a Promega Wizard Plus SV Minipreps DNA Purification System.

Genomic DNA from *S. albidoflavus* J1074 was digested with NsiI and SmlI, and the capture vector was linearised between the capture arms with AvrII. Digested material was transformed into *S. cerevisiae* VL6–48N by spheroplast polyethylene glycol 8000 transformation. Successful gene cluster capture by pCAP03 was confirmed by colony PCR. For yeast-colony PCR, each colony was resuspended in 50  $\mu$ L 1 M sorbitol (Fisher) and 2  $\mu$ L of zymolyase (5 U  $\mu$ L<sup>-1</sup>) was added to each cell suspension and incubated at 30 °C for 1 hour. Cell suspensions were then boiled for 10 min, centrifuged (15 s, 1,000  $\times$  g) and 1  $\mu$ L of the supernatant was analysed by PCR using primers Salb\_TARscr\_Fw and Salb\_TARscr\_Rv. The plasmids from four positive clones were recovered and transformed into electrocompetent *E. coli* DH5 $\alpha$  for further analytical digest of the purified construct with HindIII-HF and SrfI to confirm the identity of pCAPSalbC. The streptamidine BGC is shown in Table S8 and has been deposited at MIBiG<sup>21</sup> with accession number BGC0002115.

### **Conjugation of pCAPSalbC into *Streptomyces coelicolor* M1146**

*E. coli* ET12567/pR9604 was transformed with pCAPSalbC by electroporation, and transformants were then used to transfer pCAPSalbC into *S. coelicolor* M1146 by intergeneric conjugation. Nalidixic acid and kanamycin-resistant exconjugants containing integrated pCAPSalbC (*S. coelicolor* M1146-pCAPSalbC) were verified by PCR using Promega GoTaq polymerase with primers Salb\_TARscr\_Fw and Salb\_TARscr\_Rv.

### **Construction of pathway mutant in *S. albidoflavus* J1074**

A fragment of DNA corresponding to the translationally coupled YcaO and hydrolase genes was PCR cloned with restriction sites for EcoRI and HindIII. The DNA fragment was digested with EcoRI and HindIII and ligated into the pKC1132 plasmid digested with EcoRI and HindIII. The resulting DNA construct was isolated and transferred into *S. albidoflavus* J1074 via intergeneric conjugation with *E. coli* ET12567/pUZ8002 selected with apramycin, chloramphenicol and kanamycin. Exconjugants resistant to apramycin were validated by PCR to confirm that the YcaO and hydrolase genes had been disrupted.

### **Deletion of genes in pCAPSalbC**

Mutations of the *S. albidoflavus* J1074 BGC were carried out using an *E. coli*-based Lambda-Red-mediated PCR-targeting strategy<sup>2</sup>, which allowed substitution of genes in pCAPSalbC by a PCR-generated cassette containing the apramycin resistance gene *aac(3)-IV*. Resistance cassettes were amplified by PCR using a pIJ773-derived cassette lacking OriT as a template, which allowed the elimination of the apramycin resistance cassette after Flp-FRT recombination in *E. coli* DH5 $\alpha$  BT340. This created mutants with an in-frame 81 bp scar in the place of the original gene sequence. The PCR-targeting mutant versions of pCAPSalbC were introduced into *S. coelicolor* M1146 by *E. coli* ET12567/pR9604-mediated intergeneric conjugation and selected by resistance to nalidixic acid and kanamycin.

### **Complementation of deleted genes in *S. coelicolor* M1146-pCAPSalbC**

Constructs for the complementation of mutants were obtained by high-fidelity PCR amplification (Q5 polymerase) of each of these genes, digestion of the PCR product with NdeI and HindIII and cloning by ligation (T4 DNA ligase, Invitrogen) into pIJ10257 digested with NdeI and HindIII. Ligation mixtures were transformed into chemically competent *E. coli* DH5 $\alpha$  and the plasmids were recovered by miniprep and then sequenced. The constructs were introduced into the corresponding *S. coelicolor* M1146-pCAPSalbC mutants by *E. coli* ET12567/pR9604-mediated intergeneric conjugation. Exconjugants were selected by resistance to nalidixic acid, kanamycin and hygromycin.

### **Mutation of *amiA* in pCAPSalbC**

Amino acids within the streptomycin core peptide were mutated using a Lambda-Red-mediated recombination strategy in *E. coli* cells deficient in mismatch repair<sup>22</sup>. *E. coli* HME68 cells were grown in LB (10 mL) with chloramphenicol and grown overnight at 30 °C with shaking at 250 rpm. 300  $\mu$ L of this culture was used to inoculate LB (15 mL) with chloramphenicol, which was grown for four hours at 30 °C with shaking at 250 rpm. Recombineering activity was induced by incubating the cells for 20 minutes at 42 °C with shaking. Cells were then made electrocompetent and transformed with the pCAPSalbC construct. A 63 bp oligonucleotide (SalbPP\_Ser3CysRV) was designed containing the desired amino acid mutation flanked by 30 bp regions of homology on either side. *E. coli* HME68-pCAPSalbC cells were then co-transformed with 1  $\mu$ L (4 pmol) of the mutant oligonucleotide and 1  $\mu$ L (4 pmol) of oligo100, which produces Gal<sup>+</sup> recombinants of HME68 cells.

Recombinant cells were grown for 2 days at 30 °C on MacConkey agar containing 1% galactose, and selected for using red/white screening. Red colonies were re-streaked as patches on MacConkey agar containing 1% galactose and grown for a further 2 days at 30 °C. Mutations were then screened for by PCR using screening primers (SalbPPmut\_FWScr and SalbPPmut\_RVScr) binding ~300 bp each side of the desired mutation. Mixed populations of wild type and mutant genes were identified from sequencing data by identifying overlapping peaks for both the wild type and

mutant codons in the sequence chromatogram. Plasmid DNA from corresponding cells was isolated and transformed into *E. coli* DH5 $\alpha$  cells. Individual clones were screened for as before for pure mutants. Mutant plasmids were transformed into *S. coelicolor* M1146 by *E. coli* ET12567/pR9604-mediated intergeneric conjugation.

### **Fermentation screening for streptomidine production**

Seed cultures of *S. coelicolor* M1146-pCAPSalbC were prepared by fermentation in a 50 mL flask containing 5 mL of TSB with kanamycin selection for 48 h. 500  $\mu$ L seed culture was used to inoculate 10 mL SM12, SM14, BPM and R5 in 50 mL Falcon tubes with caps replaced by foam bungs. Control strains carrying the TAR clone with a precursor peptide gene deletion were cultured in the same way for comparison. Seed cultures of *S. albidoflavus* J1074 were grown in the same way with no antibiotic selection, and the *S. albidoflavus*  $\Delta$ amiD mutant seed cultures were grown with apramycin selection. All fermentations were conducted in triplicate and incubated at 28 °C with shaking at 230 rpm. 1 mL culture samples were taken at day 4, mixed with one volume of methanol and agitated for 30 min at room temperature. These mixtures were then centrifuged (15,871  $\times$  g, 5.5 min) and 800  $\mu$ L of the resulting supernatant was transferred to glass vials for liquid chromatography–mass spectrometry (LC–MS) analysis.

### **LC-MS analysis**

LC-MS samples were analysed on a Shimadzu Nexera X2 UHPLC coupled to a Shimadzu IT-TOF mass spectrometer. 5  $\mu$ L samples were injected onto a Phenomenex Luna Omega 1.6- $\mu$ m Polar C18 column (50 mm  $\times$  2.1 mm, 100 Å) set at a temperature of 40 °C and eluting with a linear gradient of 0–60% methanol in water + 0.1% formic acid over 6 minutes with a flow-rate of 0.6 mL min<sup>-1</sup>. Positive mode mass spectrometry data was collected between  $m/z$  200 and 2,000. Tandem MS (MS/MS) data were collected between  $m/z$  50 and 2000 in a data-dependent manner for parent ions between  $m/z$  200 and 2000, using collision-induced dissociation energy of 50% and a precursor ion width of 3 Da. The instrument was calibrated using sodium trifluoroacetate cluster ions prior to every run. Untargeted comparative metabolomics was carried out on data from triplicate samples using Profiling Solution 1.1 (Shimadzu) with an ion  $m/z$  tolerance of 100 mDa, a retention time tolerance of 0.1 min, an ion intensity threshold of 100,000 units, LabSolutions compatible ion  $m/z$  tolerances = ON, De-Isotope matrix = ON.

For accurate mass analysis, mass spectra were acquired by LC–MS on a Synapt G2-Si mass spectrometer equipped with an Acquity UPLC (Waters). Samples were injected onto an Acquity UPLC BEH C18 column, 1.7  $\mu$ m, 1  $\times$  100 mm (Waters) and eluted with a gradient of (B) acetonitrile/0.1% formic acid in (A) water/0.1% formic acid with a flow rate of 0.08 mL min<sup>-1</sup> at 45 °C. The concentration of B was kept at 1% for 1 min followed by a gradient up to 60% B over 10 min,

and then up to 99% over 2 min. MS data were collected with the following parameters: resolution mode, positive ion mode, scan time 0.5 s, mass range  $m/z$  50–1200 (calibrated with sodium formate), capillary voltage = 3.0 kV; cone voltage = 40 V; source temperature = 110 °C; desolvation temperature = 250 °C. Leu-enkephalin was used to generate a lock-mass calibration with  $m/z$  = 556.2766 measured every 30 s during the run. Comparative metabolomic analyses were carried out on the Synapt G2-Si using the same settings as above but with a mass range of  $m/z$  100–3000.

Additional MS/MS data were acquired on a Hybrid Quadrupole-Orbitrap Q-Exactive mass spectrometer coupled to a Vanquish UHPLC system (Thermo Scientific). 5  $\mu$ L samples were injected onto a Phenomenex Luna Omega 1.6- $\mu$ m Polar C18 column (50 mm x 2.1 mm, 100 Å) applying the same chromatography parameters used in the Shimadzu LC-MS analysis described above. Mass spectra were obtained in positive mode using full MS/dd-MS<sup>2</sup> acquisition settings with the following specific parameters: chromatography peak width = 7s; Full MS settings: resolution = 70,000, AGC target =  $3 \times 10^6$ , maximum IT = 100 ms, scan range 150 to 2000  $m/z$ ; dd-MS<sup>2</sup> settings: resolution 17,500, AGC target =  $1 \times 10^5$ , maximum IT = 50 ms, loop count = 5, isolation window 1.5  $m/z$ , (N)CE/stepped nce 20, 40, 60; dd settings: minimum AGC target =  $8 \times 10^3$ , exclude isotopes ON, dynamic exclusion = 1s.

Streptamidine-like molecules were searched for using a MASST search<sup>23</sup> at Global Natural Products Social Molecular Networking (<https://gnps.ucsd.edu/ProteoSAFe/static/gnps-splash.jsp>) in January 2021. A single spectrum search (version release 27) was carried out using the following settings: parent mass tolerance = 2 Da; min matched peaks = 5; ion tolerance = 0.5 Da; score threshold = 0.7; library = speclibs.

### **Purification of streptamidine**

Four 2-litre flasks containing 0.5 L of SM12 were each inoculated with 25 mL of *S. coelicolor* M1146-pCAPSalbC TSB seed culture grown for 48 hours at 28 °C. After four days fermentation at 28 °C with shaking at 250 rpm, the cultures were centrifuged to remove debris, combined and filtered to yield approximately 1.5 L of crude extract. The crude extract was extracted with ethyl acetate (3  $\times$  1.5 litres). The aqueous layer was further extracted with 1-butanol (3  $\times$  1.0 litres). The resulting aqueous extract was concentrated to 50 mL using a Buchi rotary evaporator and subjected to solid-phase chromatography (SPE) on a HP20 cartridge using a gradient of H<sub>2</sub>O-MeOH (100:0 to 0:100). Methanol and water were removed using a Buchi rotary evaporator until the samples were concentrated to approximately 10 mL. Samples were then subject to semi-preparative HPLC using a Phenomenex Luna PFP(2) column (5  $\mu$ m, 250 x 10 mm) with a gradient of aqueous 0.1% formic acid-MeOH (98:2 to 90:10) over 35 minutes with a flow rate of 2 mL min<sup>-1</sup>. The compound was monitored at a UV wavelength of 210 nm and fractions were assessed by LC-MS. Fractions containing streptamidine were combined and freeze dried. A final purification step was then carried



out using a semi-preparative Luna Omega Polar C18 column (5  $\mu\text{m}$ , 250 x 10 mm), with an isocratic gradient of aqueous 0.1% formic acid-MeOH (90:10) for 16 minutes followed by a wash gradient from 90:10 to 5:95 over 5 minutes with a flow rate of 2.8 mL min<sup>-1</sup>. The compound was monitored at a UV wavelength of 210 nm and fractions assessed by LC-MS, yielding 1.4 mg pure streptomidine.

### Structural elucidation of streptomidine

Streptomidine (1.4 mg) was dissolved in 600  $\mu\text{L}$  DMSO-d<sub>6</sub> from an individual vial and subjected to a series of 1D and 2D nuclear magnetic resonance (NMR) experiments on a Bruker Ascend 600 MHz instrument at 298 K. The NMR experiments carried out were Proton (64 scans), Carbon (25,000 scans), HSQCed (100 scans), HMBC (64 scans), COSY (16 scans), TOCSY (32 scans) and HSQC-TOCSY (64 scans). Spectra were analysed using Bruker TopSpin 3.5 and Mestrelab Research Mnova 14.0 software. NMR data are reported in Figures S11-S20 and Table S9.

### Marfey's analysis

500  $\mu\text{g}$  of pure streptomidine was hydrolysed for 16 hours with 100  $\mu\text{L}$  6 M HCl at 100 °C in a sealed glass vial contained within a heated sand block. The HCl was dried off under a stream of N<sub>2</sub> for 1 hour at room temperature. The hydrolysed sample was mixed with 20  $\mu\text{L}$  1 M NaHCO<sub>3</sub> and 40  $\mu\text{L}$  Marfey's reagent (L-FDAA [N $\alpha$ -(2,4-dinitro-5-fluorophenyl)-L-alaninamide] 1% solution in acetone) and incubated at 40 °C for 1 hour. The reaction was then neutralised with 20  $\mu\text{L}$  1 M HCl. The samples were diluted with 500  $\mu\text{L}$  50% acetonitrile and centrifuged for 1 minute at 15,871  $\times g$  to remove debris. For derivatisation of amino acid standards, 50  $\mu\text{L}$  of each L- and D- amino acid (histidine, leucine, serine, alanine, threonine, 2 mg mL<sup>-1</sup> in H<sub>2</sub>O) was mixed with 20  $\mu\text{L}$  1 M NaHCO<sub>3</sub> and 40  $\mu\text{L}$  L-FDAA in a 1.5 mL Eppendorf tube and incubated at 40 °C for 1 hour. The reaction was then neutralised with 20  $\mu\text{L}$  1 M HCl. The samples were diluted with 1 mL 50% acetonitrile and centrifuged for 1 minute at 15,871  $\times g$  to remove debris. 1  $\mu\text{L}$  each sample were injected onto a Phenomenex Kinetex 1.6- $\mu\text{m}$  C18 column (50 mm x 2.1 mm, 100 Å) set at a temperature of 40 °C and eluting with a linear gradient of (B) 50% acetonitrile from 5-50% in (A) H<sub>2</sub>O + 0.1% formic acid over 12 minutes with a flow rate of 0.6 mL min<sup>-1</sup>. Samples were analysed on a Shimadzu Nexera X2 UHPLC coupled to a Shimadzu IT-TOF mass spectrometer.

### Antimicrobial assays

10 mL cultures of each indicator strain (Table S14) were grown in LB (YPD for *Candida utilis*) overnight at 37 °C (30 °C for *C. utilis*). 100  $\mu\text{L}$  of each culture was then used to inoculate a 10 mL subculture of each strain in the same medium, which were grown for 5 hours at 37 °C (30 °C for *C. utilis*). 1 mL of each culture was then mixed with 14 mL molten LB agar, which was poured into plates. Once solidified, three 1 cm diameter plugs were taken from each agar plate, which were then separately loaded with 50  $\mu\text{L}$  streptomidine (1 mg mL<sup>-1</sup>), 50  $\mu\text{L}$  kanamycin, apramycin or nalidixic

acid (1 mg mL<sup>-1</sup>) as a positive control and 50 µL water as a solvent control. Plates were incubated overnight at 37 °C (30 °C for *C. utilis*).

### **Metal binding assays**

For the CAS assay, 500 µL of CAS assay solution (prepared as described by Alexander and Zuberer<sup>24</sup>) was mixed with 10 µL increasing concentrations of streptomidine from 1.5 µM to 25 µM. For LC-MS binding assays, solutions of 10 mM metal salts were prepared (FeCl<sub>3</sub>, CoCl<sub>2</sub>, CuCl<sub>2</sub>, MgCl<sub>2</sub>, MnSO<sub>4</sub>, NiSO<sub>4</sub>, ZnCl<sub>2</sub>, dissolved in 10 mM HCl) and 500 µL of each were mixed with 20 µL streptomidine (15 µM). 5 µL samples were analysed on a Shimadzu Nexera X2 UHPLC coupled to a Shimadzu IT-TOF mass spectrometer with a Phenomenex Luna Omega 1.6-µm Polar C18 column (50 mm x 2.1 mm, 100 Å) set at a temperature of 40 °C and eluting with a linear gradient of 0–60% methanol in water + 0.1% formic acid over 6 minutes with a flow-rate of 0.6 mL min<sup>-1</sup>. Positive mode mass spectrometry data was collected between *m/z* 200 and 2,000.

For metal starvation experiments, a minimal medium was prepared (2 g K<sub>2</sub>SO<sub>4</sub>, 3 g K<sub>2</sub>HPO<sub>4</sub>, 1 g NaCl, 5 g NH<sub>4</sub>Cl, 0.005 mg CuSO<sub>4</sub>, 0.035 mg MnSO<sub>4</sub>·H<sub>2</sub>O, 2 mg ZnSO<sub>4</sub>·7H<sub>2</sub>O, 80 mg MgSO<sub>4</sub>·7H<sub>2</sub>O, 100 mg CaCl<sub>2</sub>·2H<sub>2</sub>O, 2.5% glycerol) as described by Müller and Raymond<sup>25</sup> in glassware washed with EDTA. A series of the same minimal media omitting either copper, zinc or iron were also prepared. Seed cultures of *S. albidoflavus* J1074 and the *S. albidoflavus* *ΔamiD* mutant were prepared by fermentation in a 50 mL flask containing 5 mL of TSB (with apramycin selection for the *ΔamiD* mutant) for 48 h. 500 µL each seed culture was used to inoculate 10 mL minimal media and each metal dropout media in 50 mL Falcon tubes with caps replaced by foam bungs. Cultures were grown for 4 days and 1 mL samples were taken for LC-MS analysis as described above.

**Table S1** Strains used in this study.

| Strain                                               | Genotype/description                                                                                                                                                                                                                                                                                                | Application                                                                  |
|------------------------------------------------------|---------------------------------------------------------------------------------------------------------------------------------------------------------------------------------------------------------------------------------------------------------------------------------------------------------------------|------------------------------------------------------------------------------|
| <i>Saccharomyces cerevisiae</i> VL6-48N <sup>1</sup> | <i>MAT<math>\alpha</math></i> , <i>his3-<math>\Delta</math>1</i> , <i>trp1-<math>\Delta</math>1</i> , <i>ura3-<math>\Delta</math>1</i> , <i>lys2</i> , <i>ade2-101</i> , <i>met14 cir<sup>o</sup></i>                                                                                                               | TAR cloning                                                                  |
| <i>Escherichia coli</i> DH5 $\alpha$                 | F <sup>-</sup> $\phi$ 80 <i>lacZ</i> $\Delta$ M15 $\Delta$ ( <i>lacZYA-argF</i> )U169 <i>recA1 endA1 hsdR17</i> ( <i>r<sub>k</sub><sup>-</sup></i> , <i>m<sub>k</sub><sup>+</sup></i> ) <i>phoA</i> <i>supE44 thi-1 gyrA96 relA1 <math>\lambda</math><sup>-</sup></i>                                               | Transformation and maintenance of plasmids and constructs                    |
| <i>E. coli</i> ET12567/pUZ8002                       | <i>dam-13::Tn9 dcm-6 hsdM</i> Cml <sup>R</sup> , carrying helper plasmid pUZ8002                                                                                                                                                                                                                                    | Conjugations with pKC1132 disruption construct                               |
| <i>E. coli</i> ET12567/ pR9604                       | <i>dam-13::Tn9 dcm-6 hsdM</i> Cml <sup>R</sup> , carrying helper plasmid pR9604                                                                                                                                                                                                                                     | Conjugations with TAR cloned BGC, mutated BGC and complementation constructs |
| <i>E. coli</i> DH5 $\alpha$ /BT340                   | <i>E. coli</i> DH5 $\alpha$ carrying BT340 plasmid.                                                                                                                                                                                                                                                                 | Gene deletions                                                               |
| <i>E. coli</i> BW25113/pIJ790                        | $\Delta$ ( <i>araD-araB</i> )567, $\Delta$ <i>lacZ</i> 4787( <i>::rmB-4</i> ), <i>lacI</i> p-4000( <i>lacI</i> Q), $\lambda$ -, <i>rpoS</i> 369( <i>Am</i> ), <i>rph-1</i> , $\Delta$ ( <i>rhaD-rhaB</i> )568, <i>hsdR</i> 514. Plasmid: pIJ790 [ <i>oriR101</i> ], [ <i>repA101(ts)</i> ], <i>araBp-gam-be-exo</i> | Gene deletions                                                               |
| <i>E. coli</i> HME68                                 | W3110 <i>galK</i> <i>tyr145UAG <math>\Delta</math>lacU169</i> [ <i><math>\lambda</math> cl857 <math>\Delta</math>(cro-bioA)</i> ] $\Delta$ <i>mutS</i>                                                                                                                                                              | Mutagenesis of core peptide amino acids                                      |
| <i>Streptomyces albidoflavus</i> J1074 <sup>26</sup> | Restriction-defective derivative (R <sup>M</sup> ) of <i>S. albidoflavus</i> G                                                                                                                                                                                                                                      | Genetic source of BGC                                                        |
| <i>Streptomyces coelicolor</i> M1146 <sup>27</sup>   | $\Delta$ <i>act <math>\Delta</math>red <math>\Delta</math>cpk <math>\Delta</math>cda</i>                                                                                                                                                                                                                            | Heterologous expression of gene cluster                                      |

**Table S2** Plasmids used in this study.

| Plasmid                | Features                                                       | Resistance marker | Application                               |
|------------------------|----------------------------------------------------------------|-------------------|-------------------------------------------|
| pCAP03 <sup>20</sup>   | ARSH4/CEN6-Trp1, pUC ori, C31 int-attP-oriT-aph, URA3, ADH1    | Kanamycin         | TAR cloning                               |
| pKC1132 <sup>28</sup>  | Conjugative vector, non-integrative, <i>lacZa</i>              | Apramycin         | <i>S. albidoflavus</i> pathway disruption |
| pIJ773 <sup>2</sup>    | oriT, non-conjugative, flippase recognition target (FRT) sites | Apramycin         | Gene deletions via PCR targeting          |
| pIJ10257 <sup>29</sup> | $\Phi$ BT1, <i>permE</i> *                                     | Hygromycin        | Genetic complementation of mutants        |

**Table S3** Constructs generated in this study.

| Construct         | Resistance marker | Application                                                               |
|-------------------|-------------------|---------------------------------------------------------------------------|
| pCAPSalbC         | Kanamycin         | pCAP03-based plasmid containing the TAR cloned <i>S. albidoflavus</i> BGC |
| pCAPSalbC_ΔPP     | Kanamycin         | pCAPSalbC with deletion of precursor peptide gene                         |
| pCAPSalbC_ΔYcaO   | Kanamycin         | pCAPSalbC with deletion of YcaO gene                                      |
| pCAPSalbC_ΔE1     | Kanamycin         | pCAPSalbC with deletion of E1-like gene                                   |
| pCAPSalbC_ΔDehy   | Kanamycin         | pCAPSalbC with deletion of dehydrogenase gene                             |
| pCAPSalbC_ΔHydro  | Kanamycin         | pCAPSalbC with deletion of hydrolase gene                                 |
| pCAPSalbC_ΔOxido  | Kanamycin         | pCAPSalbC with deletion of oxidoreductase gene                            |
| pCAPSalbC_ΔABC    | Kanamycin         | pCAPSalbC with deletion of set of ABC transporter genes                   |
| pCAPSalbC_ΔIrTr   | Kanamycin         | pCAPSalbC with deletion of set of iron transporter genes                  |
| pCAPSalbC_ΔPepMet | Kanamycin         | pCAPSalbC with deletion of peptidyl methionine gene                       |
| pCAPSalbC_ΔOxyg   | Kanamycin         | pCAPSalbC with deletion of oxygenase gene                                 |
| pCAPSalbC_ΔAcet   | Kanamycin         | pCAPSalbC with deletion of both acetyltransferase genes                   |
| pCAPSalbCSer3Cys  | Kanamycin         | pCAPSalbC with core peptide Ser3 to Cys3 mutation                         |
| pKC1132_SalbYH    | Apramycin         | Construct for disruption of <i>S. albidoflavus</i> BGC in native host     |
| pJJSalb_YcaO      | Hygromycin        | Construct for complementation of YcaO deletion                            |
| pJJSalb_E1        | Hygromycin        | Construct for complementation of E1 deletion                              |
| pJJSalb_Dehy      | Hygromycin        | Construct for complementation of dehydrogenase deletion                   |

**Table S4** Media used in this study.

| Medium                | Application          | Ingredients per 1 L, made up with milliQ water                                                                                                                                                             |
|-----------------------|----------------------|------------------------------------------------------------------------------------------------------------------------------------------------------------------------------------------------------------|
| LB                    | <i>E. coli</i>       | 10 g Bacto-tryptone, 5 g yeast extract, 10 g NaCl, adjust to pH 7 with NaOH                                                                                                                                |
| DNA                   | <i>E. coli</i>       | 4 g Difco Nutrient Broth powder, 10 g agar                                                                                                                                                                 |
| MacConkey agar        | <i>E. coli</i>       | 17 g peptone, 3 g protease peptone, 10 g lactose monohydrate, 1.5 g bile salts, 5 g NaCl, 0.03 g neutral red, 0.001 g crystal violet, 13.5 g agar                                                          |
| TSB                   | <i>Streptomyces</i>  | 17 g tryptone, 3 g phytone, 5 g NaCl, 2.5 g K <sub>2</sub> HPO <sub>4</sub> , 2.5 g glucose                                                                                                                |
| SFM                   | <i>Streptomyces</i>  | 20 g mannitol, 20 g soya flour, 100 mM CaCl <sub>2</sub> , 20 g agar                                                                                                                                       |
| YPD                   | <i>Saccharomyces</i> | 10 g yeast extract, 20 g peptone, 20 g glucose (15 g agar), 0.004% adenine                                                                                                                                 |
| SD-Trp                | <i>Saccharomyces</i> | 5 g (NH <sub>4</sub> ) <sub>2</sub> SO <sub>4</sub> , 1.7 g YNB-AA, 20 g glucose, 0.74 g CSM-Trp (20 g agar), 0.004% adenine                                                                               |
| Top selective agar    | <i>Saccharomyces</i> | 182 g sorbitol, 22 g dextrose, 30 g agar, 0.0002% 5-FOA, 0.004% adenine                                                                                                                                    |
| Bottom selective agar | <i>Saccharomyces</i> | 182 g sorbitol, 22 g dextrose, 20 g agar, 0.0002% 5-FOA, 0.004% adenine                                                                                                                                    |
| R5                    | <i>Streptomyces</i>  | 103 g sucrose, 0.25 g K <sub>2</sub> SO <sub>4</sub> , 10.12 g MgCl <sub>2</sub> .6H <sub>2</sub> O, 10 g glucose, 0.1 g casamino acids, 2 mL trace element solution, 5 g yeast extract, 5.73 g TES buffer |
| SM12                  | <i>Streptomyces</i>  | 10 g soy flour, 50 g glucose, 4 g peptone, 4 g beef extract, 1 g yeast extract, 2.5 g NaCl, 5 g CaCO <sub>3</sub> , adjust to pH 7.6 with KOH                                                              |
| SM14                  | <i>Streptomyces</i>  | 10 g glucose, 20 g soy peptone, 5 g meat extract, 5 g NaCl, 0.01 g ZnSO <sub>4</sub> .7H <sub>2</sub> O, adjust to pH 7.0 with KOH                                                                         |
| BPM                   | <i>Streptomyces</i>  | 15 g starch, 5 g yeast extract, 10 g soy flour, 5 g NaCl, 3 g CaCO <sub>3</sub> , 25 µg/mL CoCl <sub>2</sub>                                                                                               |

**Table S5** Solutions used for TAR cloning.

| Solution           | Ingredients per 100 mL, made up with milliQ water                            |
|--------------------|------------------------------------------------------------------------------|
| 10x nitrogen bases | 1.9 g YNB-AA, 1.9 g CSM-Trp, 5 g NH <sub>4</sub> SO <sub>4</sub>             |
| 100x adenine       | 1 g adenine, 74 mM HCl                                                       |
| SPE                | 10 mM HEPES buffer pH 7.5, 100 mM EDTA pH 8, 18.2 g sorbitol                 |
| SOS                | 15 mM CaCl <sub>2</sub> , 0.25 g yeast extract, 18.2 g sorbitol, 1 g peptone |
| STC                | 10 mM Tris.HCl pH 7.5, 10 mM CaCl <sub>2</sub> , 18.2 g sorbitol             |
| PEG                | 10 mM Tris.HCl pH 7.5, 10 mM CaCl <sub>2</sub> , 20 g PEG8000                |

**Table S6** Primers used in this study.

| Primer name          | Sequence (5'-3')                                                                                                           | Use                                                                            | Restriction site |
|----------------------|----------------------------------------------------------------------------------------------------------------------------|--------------------------------------------------------------------------------|------------------|
| SalbCap_Fw           | GCTGCCGGGCCGGCTCCTAGGTCTACATCGGGG<br>ACATCAGCGACGCCCGTCCC CGAGTCTTCCGAT<br>GCCGTTAATTAAGCCACTATTTATACCATGGGAG<br>GCGTCAAAC | Construction of pCAP03-derived capture vector for TAR cloning                  | -                |
| SalbCap_Rv           | TGTCCCCGATGTAGACCTAGGAGCCGGCCCGGC<br>AGCTGACGGGTCAGCCACGGCAGGAACCGCGG<br>GCCGTCATATGTCGAAAGCTACATATAAGGAACG<br>TGCTG       |                                                                                | -                |
| Salb_ClusScr_Fw      | GCAGGACGGAACCGAGGGATG                                                                                                      | Screening for cluster capture                                                  | -                |
| Salb_ClusScr_Rv      | TGGGAGAGGATCGCCTCGGC                                                                                                       |                                                                                | -                |
| Salb_YHMut_Fw        | GATACAAAGCTTGACTGGATACGCGCCCAGC                                                                                            | Amplification of DNA fragment for pathway disruption in <i>S. albidoflavus</i> | HindIII          |
| Salb_YHMut_Rv        | GATACAGAATTCGCTCACCTCCAGGCCGGACC                                                                                           |                                                                                | EcoRI            |
| Salb_TAR_PPDel_Fw    | CGTCCACCACGCATCGAACTGAATGGAGCTCAAC<br>T CATGATTCCGGGGATCCGTCGACC                                                           | Precursor peptide gene deletion                                                | -                |
| Salb_TAR_PPDel_Rv    | TGTCAGCCGGCCGCGTCACCGCGGCCTGGGC<br>TGACTATGTAGGCTGGAGCTGCTTC                                                               |                                                                                | -                |
| Salb_TAR_E1Del_Fw    | GCCCATCCCCTCGTACTCCATCCGACGGAGTTT<br>CCGTGATTCCGGGGATCC                                                                    | E1-like gene deletion                                                          | -                |
| Salb_TAR_E1Del_Rv    | CGGGCCGCTCCCCCTTGCGGGCAGCGGGGCCA<br>CCGGCGGTGTAGGCTGGAGCTGCTTC                                                             |                                                                                | -                |
| Salb_TAR_YcaODel_Fw  | GACCTGCCGATGACCGCCGCCCTGCCCTCGAC<br>GCCCTCATTCCGGGGATCCGTCGACC                                                             | YcaO gene deletion                                                             | -                |
| Salb_TAR_YcaODel_Rv  | GGGAGCCGGGGTACATGTGCGGGCGGGGG<br>CGAGGGTTGTAGGCTGGAGCTGCTTC                                                                |                                                                                | -                |
| Salb_TAR_HydrDel_Fw  | GCTGCCCGCAAGGGGAGCGGCCCGGCATGAC<br>GCCCGGATTCCGGGGATCCGTCGACC                                                              | Hydrolase gene deletion                                                        | -                |
| Salb_TAR_HydrDel_Rv  | GGGCGTCGAGGGGAGGGCGGGCGGTCATCGGC<br>AGGTCTGTAGGCTGGAGCTGCTTC                                                               |                                                                                | -                |
| Salb_TAR_DehyDel_Fw  | CGCCCCGCCCGCACATGTGACCCCCGGCTCC<br>CCCATGATTCCGGGGATC                                                                      | Dehydrogenase gene deletion                                                    | -                |
| Salb_TAR_DehyDel_Rv  | GGGTGAGGTGTCGGGGGCGGGCCGTGCGCGG<br>CGGCTCATGTAGGCTGGA                                                                      |                                                                                | -                |
| Salb_TAR_OxidoDel_Fw | CGCCCGGCCCGCACCCCTACCGAGGAGTTC<br>CCCGTATTCCGGGGATCCGTCGACC                                                                | Oxidoreductase gene deletion                                                   | -                |
| Salb_TAR_OxidoDel_Rv | GCGACACCCTGGCCCGCGCCTGGCCGAGCTGAG<br>GAGTCATGTAGGCTGGAGCTGCTTC                                                             |                                                                                | -                |
| Salb_TAR_MarRDel_Fw  | AGGGACGCTACACGACGAGCGAGGAGACCCGCG<br>ACCATGATTCCGGGGATCCGTCGACC                                                            | MarR regulator gene deletion                                                   | -                |
| Salb_TAR_MarRDel_Rv  | ACGGGGCGGAGGCGGACCCGGTGGGGCGGTGA<br>CTCCTCATGTAGGCTGGAGCTGCTTC                                                             |                                                                                | -                |

| Primer name        | Sequence (5'-3')                                                | Use                                                               | Restriction site |
|--------------------|-----------------------------------------------------------------|-------------------------------------------------------------------|------------------|
| Salb_TAR_Oxyg_Fw   | TCGAAGTTCACCATCCAGCAGCGCGGTTCCC<br>GCGATGATTCCGGGGATCCGTCGACC   | Oxygenase gene deletion                                           | -                |
| Salb_TAR_Oxyg_Rv   | CGTTCTCGCTCATGCGGTCTCCTTCGGCTC<br>GTTTCATGTAGGCTGGAGCTGCTTC     |                                                                   | -                |
| Salb_TAR_IrTr_Fw   | ACGCGTCCCCGCAGGACGGAACCGAGGGATGAA<br>GCCATGATTCCGGGGATCCGTCGACC | Iron transporters gene deletions                                  | -                |
| Salb_TAR_IrTr_Rv   | GGTCGGTTCGTCGAGGAGGAGGGTCCGGGTGTC<br>CTGGGCTGTAGGCTGGAGCTGCTTC  |                                                                   | -                |
| Salb_TAR_ABC_Fw    | CGACCACCTCACCCCGCCCGGAGAGACGTACCC<br>GCGATGATTCCGGGGATCCGTCGACC | ABC transporters gene deletions                                   | -                |
| Salb_TAR_ABC_Rv    | CGTGTGCGTGCGCGTGTACGCACGCTTCGGTGC<br>GGGTCATGTAGGCTGGAGCTGCTTC  |                                                                   | -                |
| Salb_TAR_PepMet_Fw | CCGGGCGCATGTCGATGCCAGTCGGGAGCACAG<br>CGTATGATTCCGGGGATCCGTCGACC | Peptide methionine sulfoxide reductase MsrA gene deletion         | -                |
| Salb_TAR_PepMet_Rv | CCCCGGCTCCTCGGTCCGGTGAAGGAGTGCTGT<br>GGCTCATGTAGGCTGGAGCTGCTTC  |                                                                   | -                |
| Salb_TAR_Acet_Fw   | CCGCCGGTCCGCACGCCACCGGGAGGGGCCCA<br>CCGCATGATTCCGGGGATCCGTCGACC | Acetyl transferase and maltose-O-acetyltransferase gene deletions | -                |
| Salb_TAR_Acet_Rv   | GGGCCCGGCCCTTCGCGTGTACGTACGGGCC<br>CCGTCATGTAGGCTGGAGCTGCTTC    |                                                                   | -                |
| SalbCycl_PE_Fw     | GATACACATATGACCAGCAGCCGACTCGCC                                  | Complementation of E1-like protein                                | NdeI             |
| SalbCycl_PE_Rv     | GATACAAAGCTTGTGGTCGCGGGCGTCATGC                                 |                                                                   | HindIII          |
| SalbYcaO_PE_Fw     | GATACACATATGACCCGCCCCCTGCC                                      | Complementation of YcaO                                           | NdeI             |
| SalbYcaO_PE_Rv     | GATACAAAGCTTGGGGAGCCGGGGTACATG                                  |                                                                   | HindIII          |
| SalbDehy_PE_Fw     | GATACACATATGACCCCTGACGCCACCCTCG                                 | Complementation of dehydrogenase                                  | NdeI             |
| SalbDehy_PE_Rv     | GATACAAAGCTTGTCTCATCGGGCGGCTCCCAG                               |                                                                   | HindIII          |
| PPDel_screen_Fw    | GCGGCTGGCCGGTCTGTTAC                                            | Screening precursor peptide gene deletion                         | -                |
| PPDel_screen_Rv    | CGGCTGCTGGTCACGAAACC                                            |                                                                   | -                |
| CyclDel_screen_Fw  | GGTGCCGCGGACGACAAGTAG                                           | Screening E1-like gene deletion                                   | -                |
| CyclDel_screen_Rv  | GTCGTACGGGGTGGGATCAG                                            |                                                                   | -                |
| YcaODel_screen_Fw  | ACCAGGCTGCGGTCGAGA                                              | Screening YcaO gene deletion                                      | -                |
| YcaODel_screen_Rv  | AGGTGGTCGAGGTCGACGGG                                            |                                                                   | -                |
| HydrDel_screen_Fw  | CTCCTCACCGCCGACCTCCTC                                           | Screening hydrolase gene deletion                                 | -                |
| HydrDel_screen_Rv  | GTGCCGAGCGAGACCCGGT                                             |                                                                   | -                |
| DehyDel_screen_Fw  | TCGACCTGACCACCGAGGACG                                           | Screening dehydrogenase gene deletion                             | -                |
| DehyDel_screen_Rv  | ACCAGGGCGAGCAGGGCG                                              |                                                                   | -                |
| OxidoDel_Screen_Fw | CATCCCTCGGTTCCGTCTCTG                                           | Screening oxidoreductase deletion                                 | -                |
| OxidoDel_Screen_Rv | AGCACCTGATCCGGCTGAC                                             |                                                                   | -                |
| Salb_oxyg_scr_Fw   | CAGTTGAGGGGGCGGATCGTTC                                          | Screening oxygenase deletion                                      | -                |
| Salb_oxyg_scr_Rv   | GAAAGGCCAGCTGGGCGTC                                             |                                                                   | -                |
| Salb_IronTr_scr_Fw | CAGAGGCGTCCCACGCGTC                                             |                                                                   | -                |

| Primer name        | Sequence (5'-3')                                                               | Use                                                                    | Restriction site |
|--------------------|--------------------------------------------------------------------------------|------------------------------------------------------------------------|------------------|
| Salb_IronTr_scr_Rv | GAACGGCGTGGCGACTGCC                                                            | Screening iron transporters deletion                                   | -                |
| Salb_ABCTr_scr_Fw  | CTCACCCCGCCCGGAGAGAC                                                           | Screening ABC transporters deletion                                    | -                |
| Salb_ABCTr_scr_Rv  | GTGCGTGCGCGTGTACGCAC                                                           |                                                                        | -                |
| Salb_PepMet_scr_Fw | GACCCCGGCTCCTCGGTCC                                                            | Screening peptide methionine sulfoxide reductase MsrA deletion         | -                |
| Salb_PepMet_scr_Rv | CGCATGTGCGATGCCAGTCGG                                                          |                                                                        | -                |
| Salb_acet_scr_Fw   | GTGACACCAAGGTGCCGCGAAC                                                         | Screening acetyl transferase and maltose-O-acetyltransferase deletions | -                |
| Salb_acet_scr_Rv   | GGCCCCCTTCGCGTGTACG                                                            |                                                                        | -                |
| MarR_screen_Fw     | TCAGCCCCGACCGTCCTG                                                             | Screening MarR deletion                                                | -                |
| MarR_screen_Rv     | CGACCACGCCGAGGAGGTC                                                            |                                                                        | -                |
| pIJ10257_Fw        | TTCGAGTGGCGGCTTGCG                                                             | Screening for pIJ10257 insert                                          | -                |
| pIJ10257_Rv        | CAAACGGCATTGAGCGTCAGC                                                          |                                                                        | -                |
| SalbPP_Ser3CysRV   | GTTCTCGACGAGGGCGTTGGAGTGGGTGGCGCA<br>GAGGTGGGCCAGCTGGCCCGGGTCGGCGAT            | Core peptide mutation                                                  |                  |
| Oligo100           | AAGTCGCGGTGCGAACCGTATTGCAGCAGCTTTA<br>TCATCTGCCGCTGGACGGCGCACAAATCGCGCTT<br>AA |                                                                        |                  |
| SalbPPmut_FWScr    | GCCGAAGTGCTGGGTGTGCGAG                                                         | Screening core peptide mutation                                        |                  |
| SalbPPmut_RVScr    | GTGCCGGTGTGCGAGGTGCGAG                                                         |                                                                        |                  |

**Table S7** Accurate masses of streptomidine and related compounds.

| Description                                         | Formula                                                        | Calc. [M+H] <sup>+</sup>         | Obs. m/z | Error (ppm) |
|-----------------------------------------------------|----------------------------------------------------------------|----------------------------------|----------|-------------|
| Streptomidine (HLSATH amidine)                      | C <sub>28</sub> H <sub>42</sub> N <sub>10</sub> O <sub>8</sub> | 324.1666 ([M+2H] <sup>2+</sup> ) | 324.1666 | 0.00        |
|                                                     |                                                                | 647.3260                         | 647.3251 | 1.39        |
| Predicted HLSAT amidine                             | C <sub>22</sub> H <sub>35</sub> N <sub>7</sub> O <sub>7</sub>  | 510.2671                         | 510.2668 | 0.59        |
| Predicted HLSA amidine                              | C <sub>18</sub> H <sub>28</sub> N <sub>6</sub> O <sub>5</sub>  | 409.2194                         | 409.2195 | -0.24       |
| Predicted acetylated and dehydrated LSA (peptide A) | C <sub>14</sub> H <sub>23</sub> N <sub>3</sub> O <sub>5</sub>  | 314.1710                         | 314.1711 | -0.32       |
| Predicted dehydrated LSA (peptide B)                | C <sub>12</sub> H <sub>21</sub> N <sub>3</sub> O <sub>4</sub>  | 272.1604                         | 272.1595 | 3.31        |
| Acetylated LSA (peptide C)                          | C <sub>14</sub> H <sub>25</sub> N <sub>3</sub> O <sub>6</sub>  | 354.1636 ([M+Na] <sup>+</sup> )  | 354.1636 | 0.00        |



**Table S8** Proteins encoded in the streptomidine biosynthetic gene cluster.

| Protein Name      | Locus tag <sup>a</sup><br>NC_020990.1/<br>CP004370.1 | Protein ID <sup>a</sup><br>NC_020990.1/<br>CP004370.1 | Pfam domain   | Predicted function/domain | Size (AA)        |
|-------------------|------------------------------------------------------|-------------------------------------------------------|---------------|---------------------------|------------------|
| AmiX              | XNR_RS28595<br>XNR_5767                              | WP_106428983.1<br>AGI92072.1                          | No Pfam match | Oxidoreductase            | 410 <sup>b</sup> |
| AmiF1             | XNR_RS28600<br>XNR_5768                              | WP_015508294.1<br>AGI92073.1                          | PF01497       | Iron transporter complex  | 329              |
| AmiF2             | XNR_RS28605<br>XNR_5769                              | WP_003946623.1<br>AGI92074.1                          | PF01032       | Iron transporter complex  | 344              |
| AmiF3             | XNR_RS28610<br>XNR_5770                              | WP_015508295.1<br>AGI92075.1                          | PF01032       | Iron transporter complex  | 351              |
| AmiF4             | XNR_RS28615<br>XNR_5771                              | WP_003946621.1<br>AGI92076.1                          | PF00005       | Iron transporter complex  | 278              |
| AmiA <sup>c</sup> | XNR_5772 <sup>c</sup>                                | AGI92077.1 <sup>c</sup>                               | No Pfam match | Precursor peptide         | 44               |
| AmiB              | XNR_RS28620<br>XNR_5773                              | WP_015508297.1<br>AGI92078.1                          | No Pfam match | E1-like protein           | 281              |
| AmiC              | XNR_RS28625<br>XNR_5774                              | WP_015508298.1<br>AGI92079.1                          | PF02129       | Hydrolase                 | 508              |
| AmiD              | XNR_RS28630<br>XNR_5775                              | WP_008409979.1<br>AGI92080.1                          | PF02624       | YcaO-domain               | 455              |
| AmiE              | XNR_RS28635<br>XNR_5776                              | WP_015508299.1<br>AGI92081.1                          | No Pfam match | Dehydrogenase             | 435              |
| AmiT1             | XNR_RS28640<br>XNR_5777                              | WP_003946615.1<br>AGI92082.1                          | PF00005       | ABC transporter           | 581              |
| AmiT2             | XNR_RS28645<br>XNR_5778                              | WP_015508300.1<br>AGI92083.1                          | PF00005       | ABC transporter           | 594              |

<sup>a</sup> Locus tags and protein IDs are provided both for the NCBI RefSeq accession (NC\_020990.1) and the GenBank accession (CP004370.1) of the *S. albidoflabus* J1074 genome sequence.

<sup>b</sup> AGI92072.1/XNR\_5767 annotated as a 417 AA protein.

<sup>c</sup> Precursor peptide AmiA is not annotated in the RefSeq accession (NC\_020990.1).

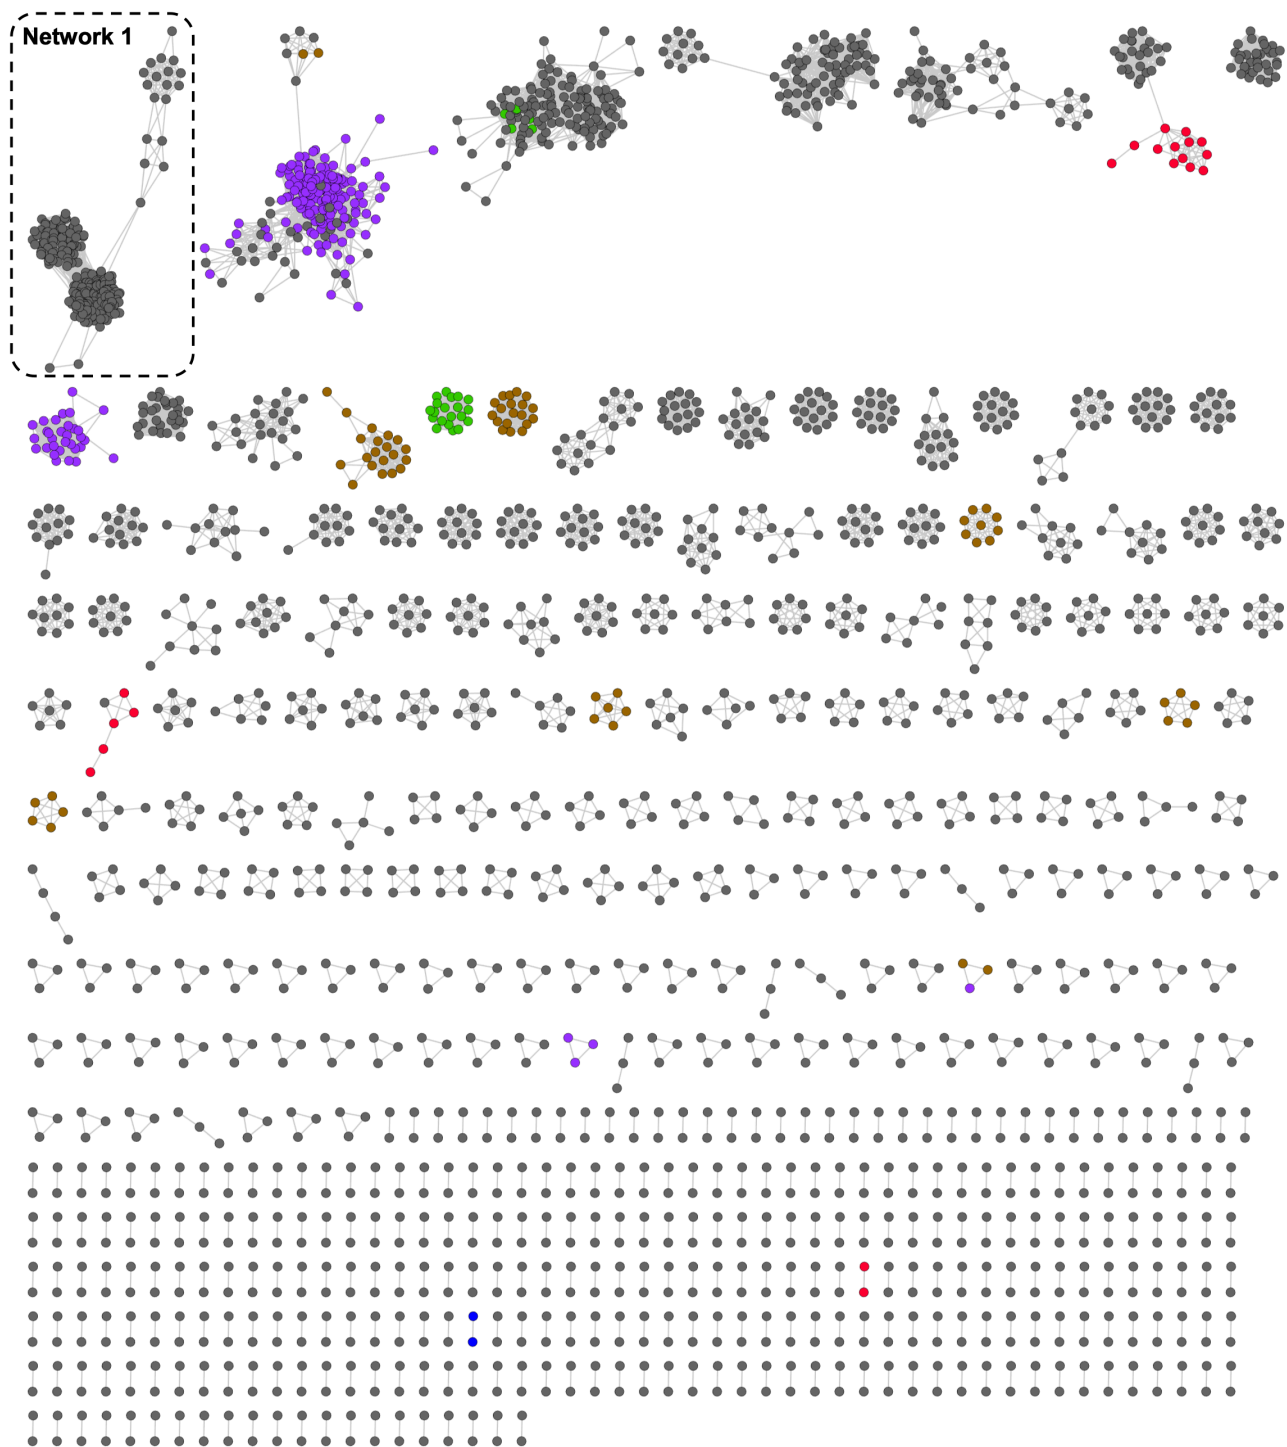

**Figure S1** Precursor peptide networks associated with Actinobacterial YcaO proteins. Precursors with homology to known RiPPs are highlighted: green = bottromycin family (NCBI HMM domain NF033414), brown = thiazolylpeptide families (NF033400 and NF033399), red = thioviridamide family (NF033415), purple = thiocillin families (NF033482 and NF033401), dark blue = lasso peptide family (NF033521).

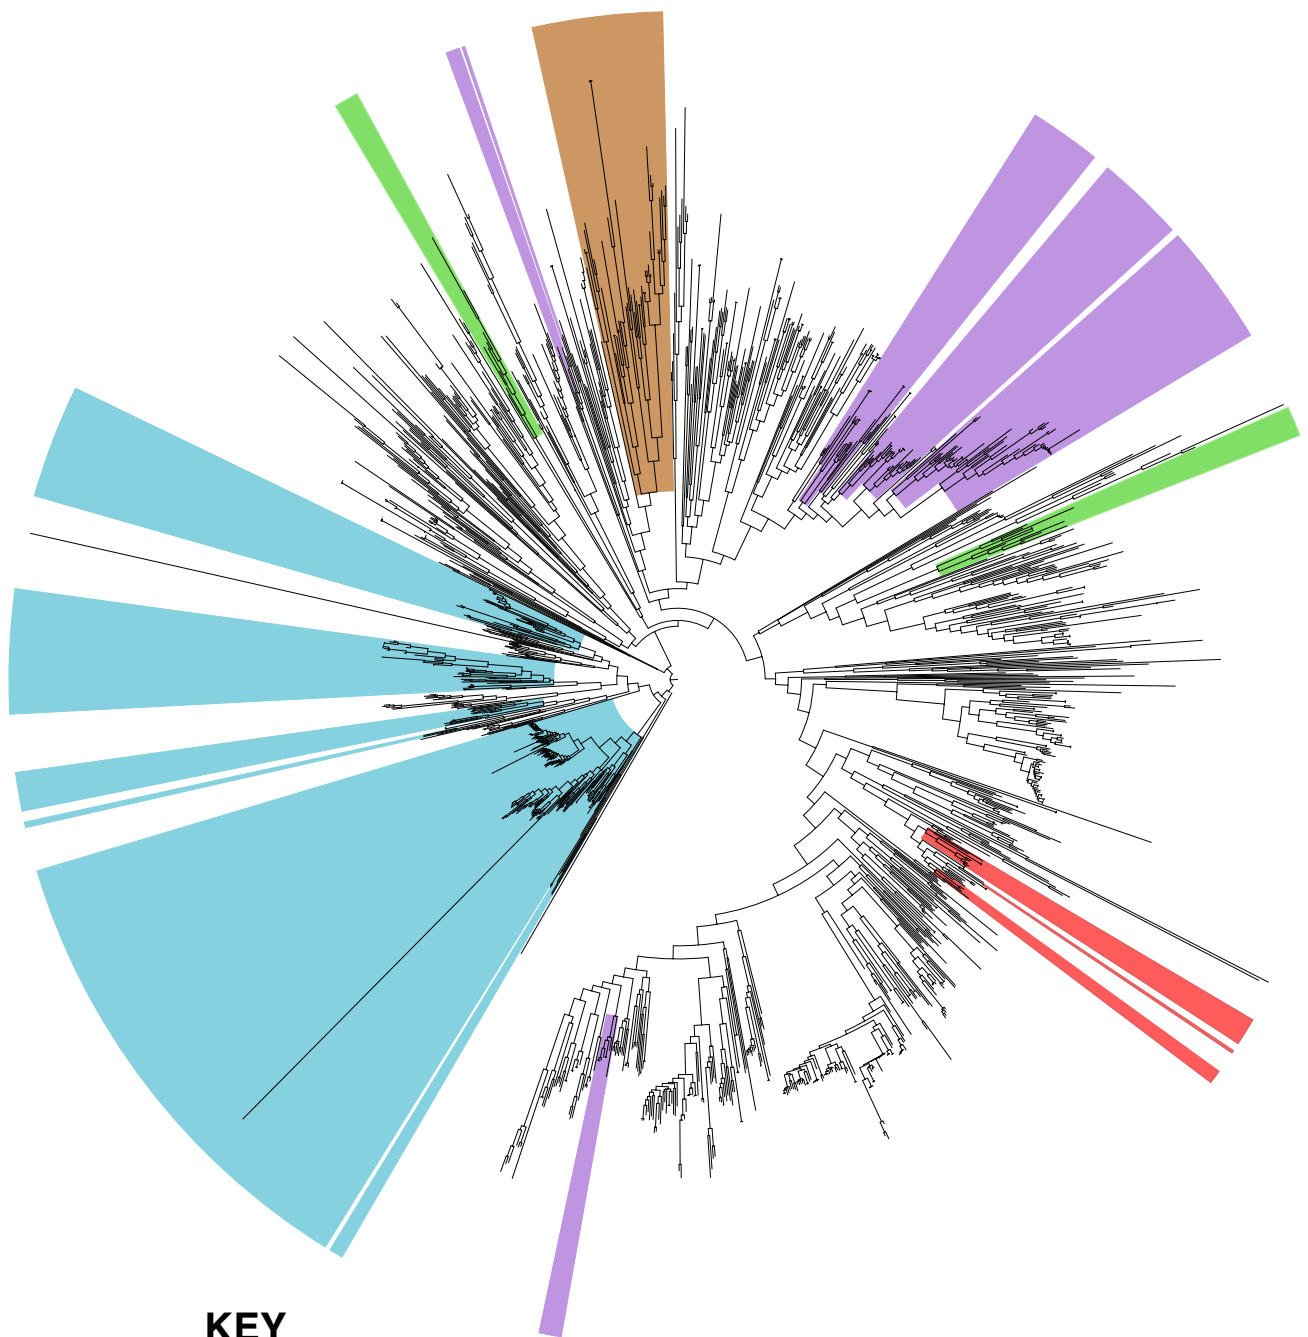

**KEY**

- Bottromycin YcaO proteins
- Thiocillin-like YcaO proteins
- Thiazolylpeptide-like YcaO proteins
- Thioviridamide YcaO proteins
- Network 1 (streptamidine-like) YcaO proteins

**Figure S2** Version of the actinobacterial YcaO maximum likelihood tree shown in Figure 2 with branch distances included. A single colour (blue) is used to highlight all YcaO protein clades associated with Network 1 peptides. Figure generated using iTOL<sup>7</sup>.

**Figure S3 (shown below)** Alignment of precursor peptides from network 1 containing motif A. Sequences were aligned using ClustalW<sup>12</sup> and visualised using Jalview<sup>30</sup> with Taylor colour-coding<sup>31</sup>. The figure extends to the following page, which includes the consensus sequence for these Motif A peptides with the streptomidine core peptide region highlighted.

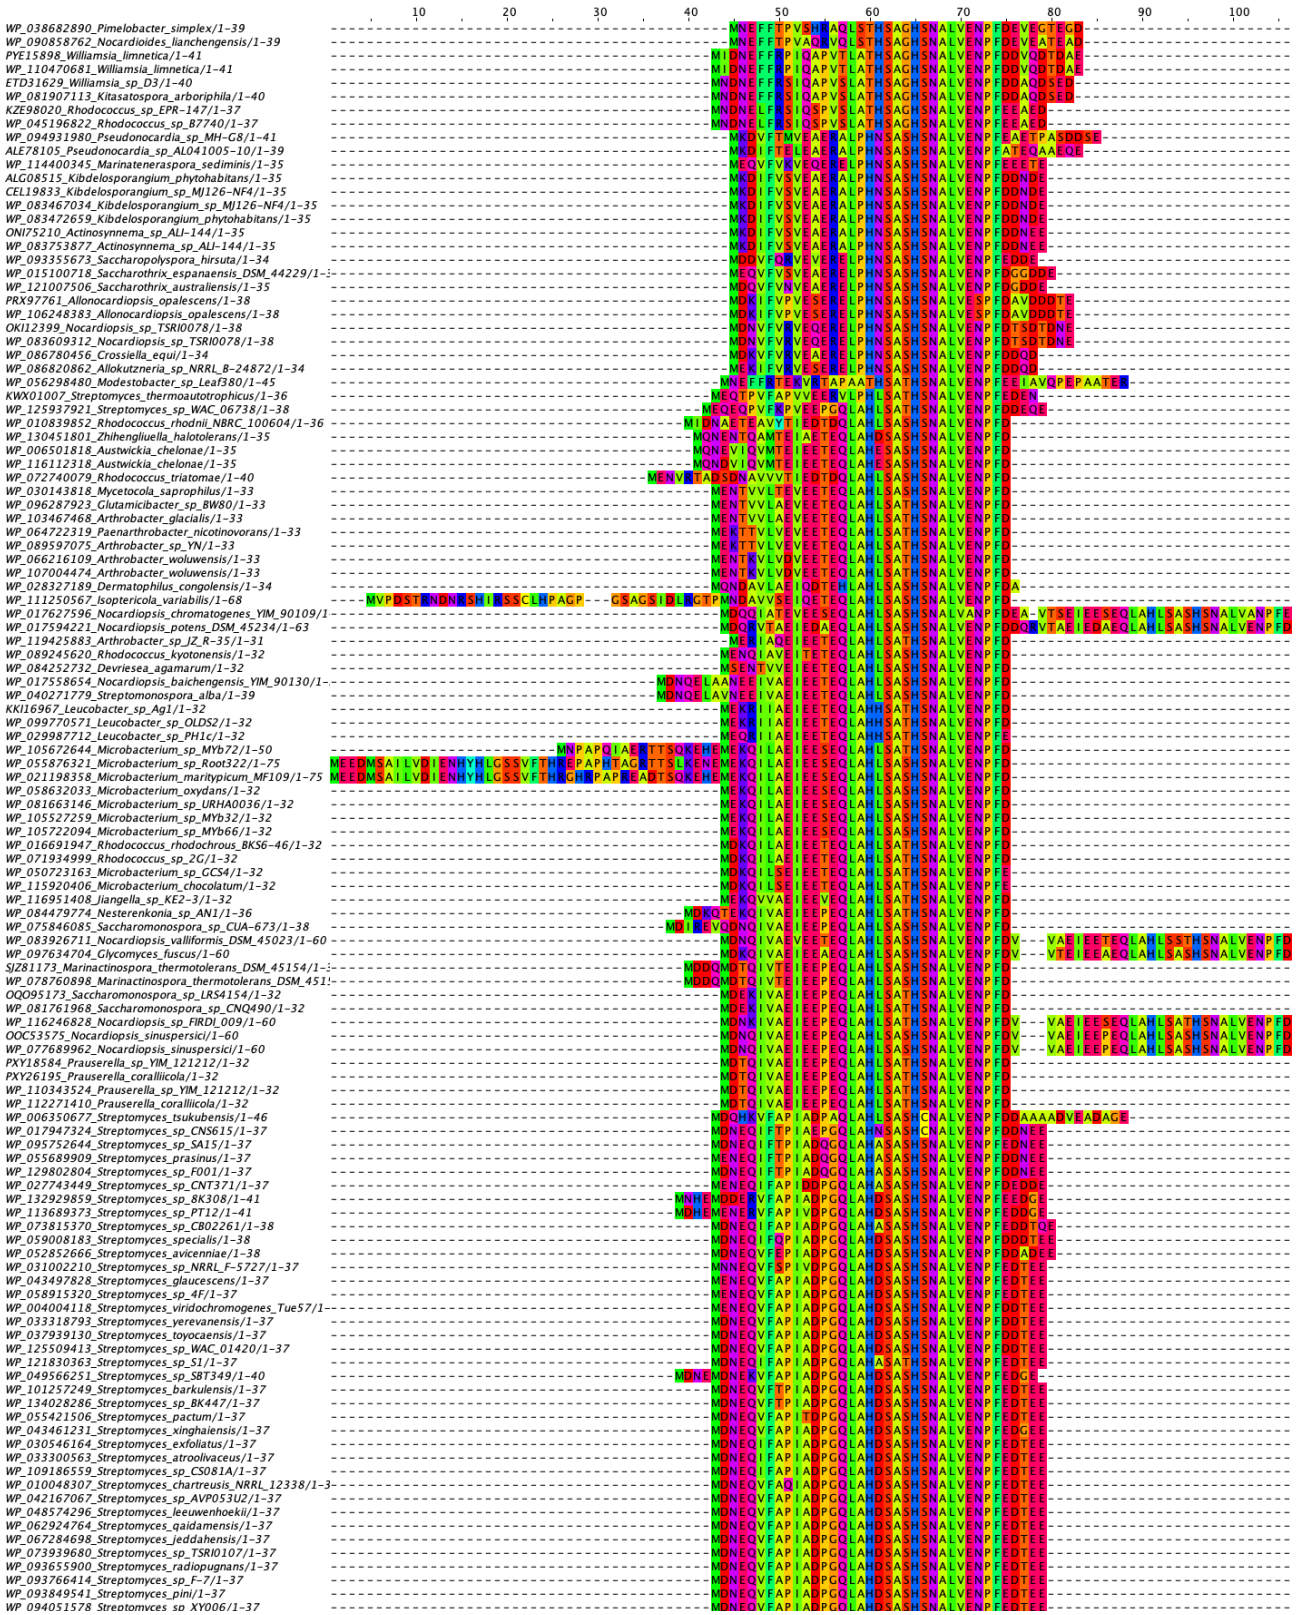

Figure S3 continued:

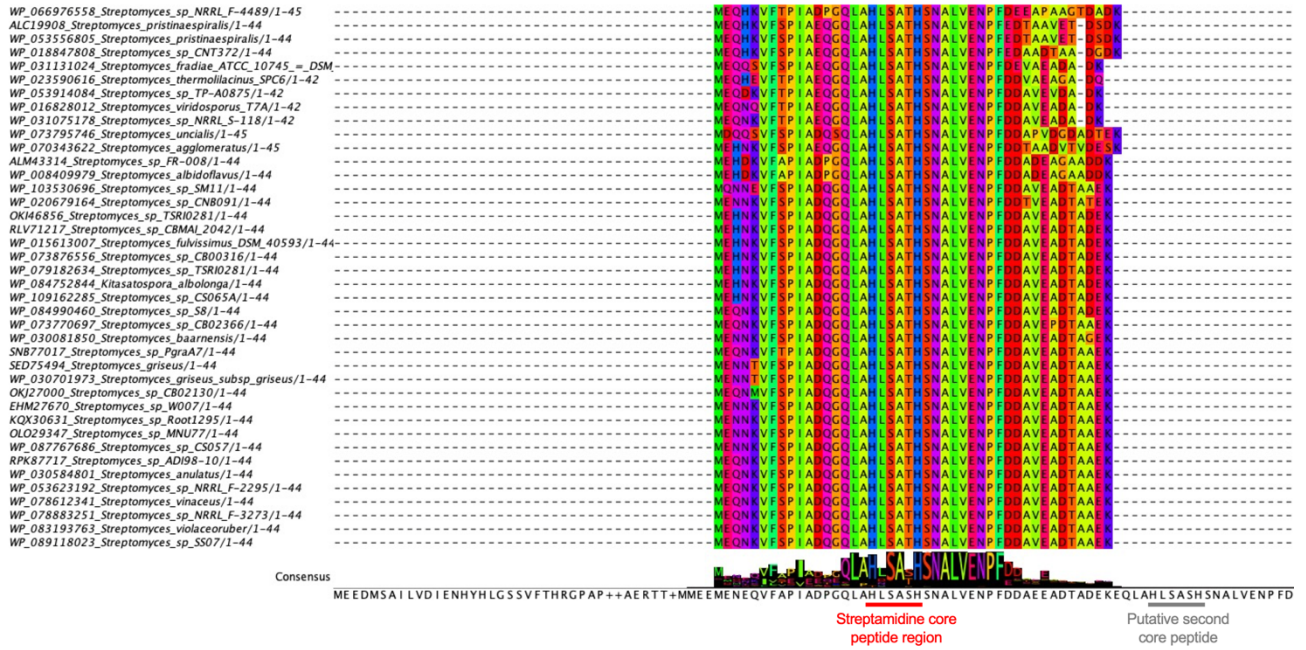

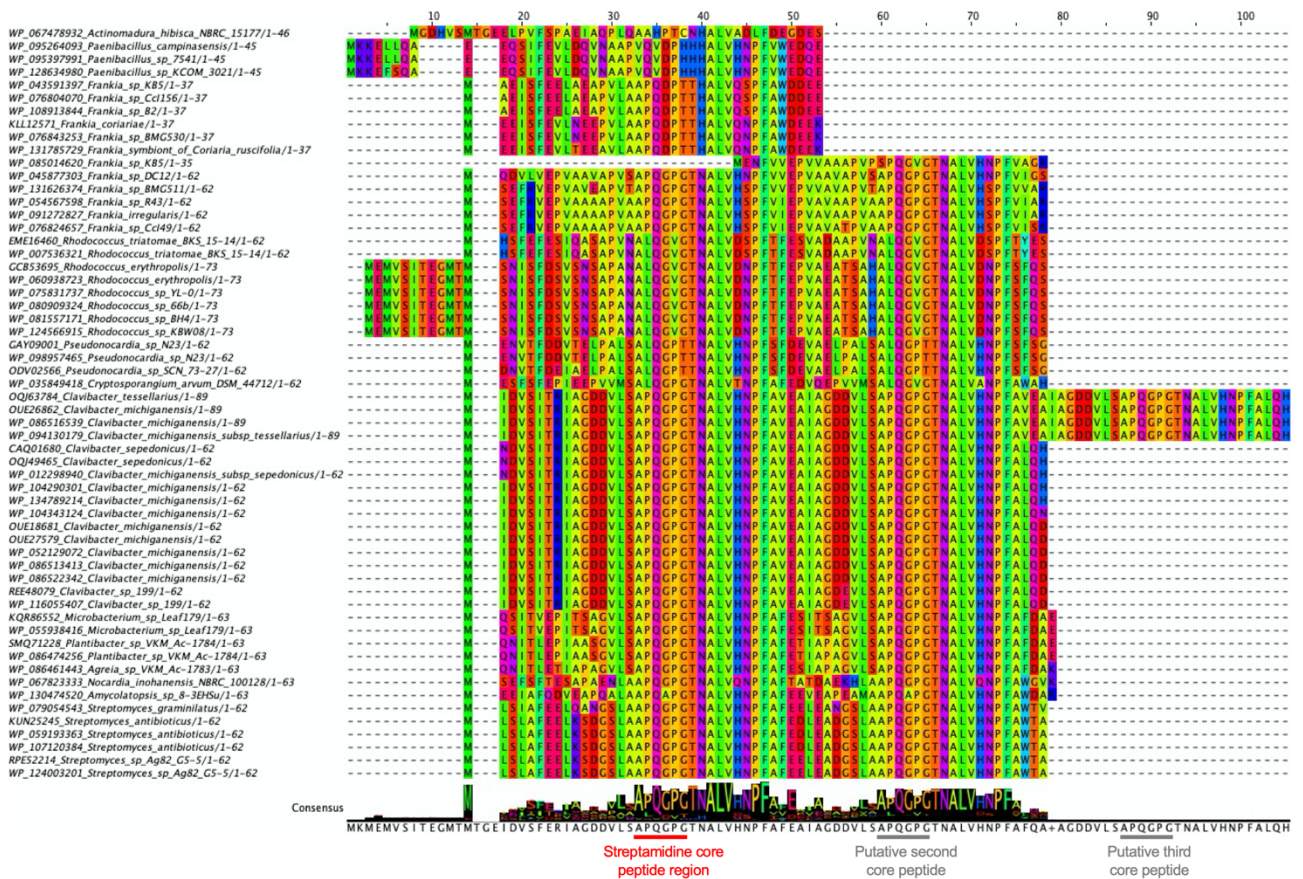

**Figure S4** Alignment of precursor peptides from network 1 containing motif B. Sequences were aligned using ClustalW<sup>12</sup> and visualised using Jalview<sup>30</sup> with Taylor colour-coding<sup>31</sup>. The consensus sequence for these Motif B peptides is shown with the putative streptamidine core peptide region(s) highlighted based on their proximity to the ALV motif.

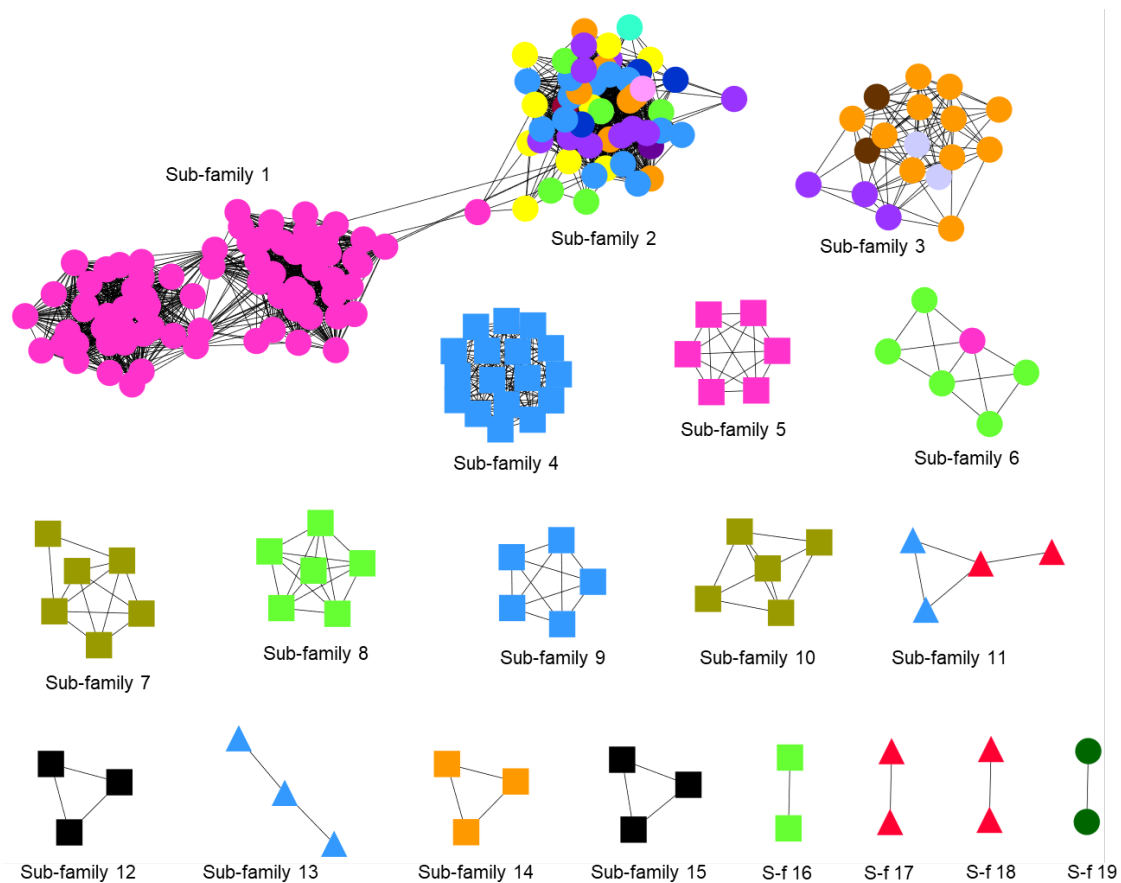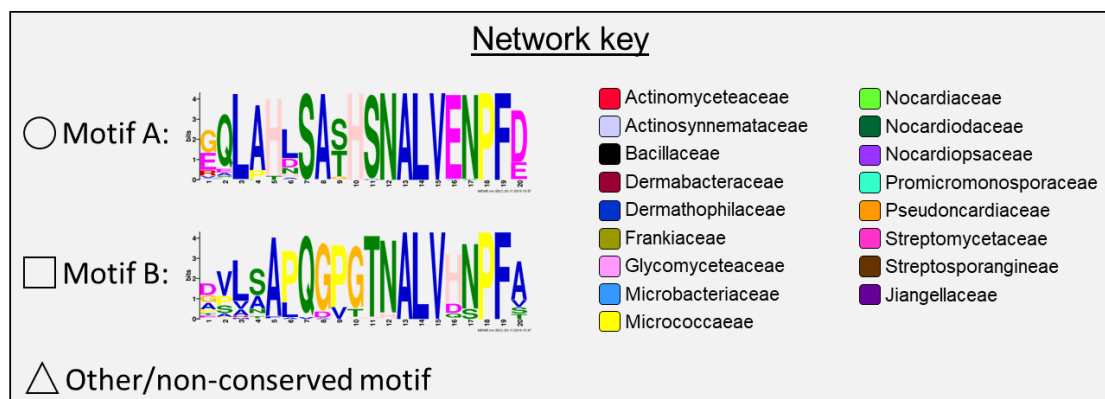

**Figure S5** Network analysis of the 237 peptide sequences identified with RIPPER (network 1 from Figure 1 and Figure S1) using an identity cut-off of 80%. Similar sequences are clustered together in sub-families and nodes are colour coded by the associated bacterial family. Peptides containing motif A are indicated with a circular node and peptides containing motif B are indicated by a square node. Precursors containing neither motif are indicated by a triangular node. Motifs A and B were identified by MEME<sup>14</sup> analysis of the 237 sequences. Each motif appears once, twice or three times in 208 of the precursor sequences.

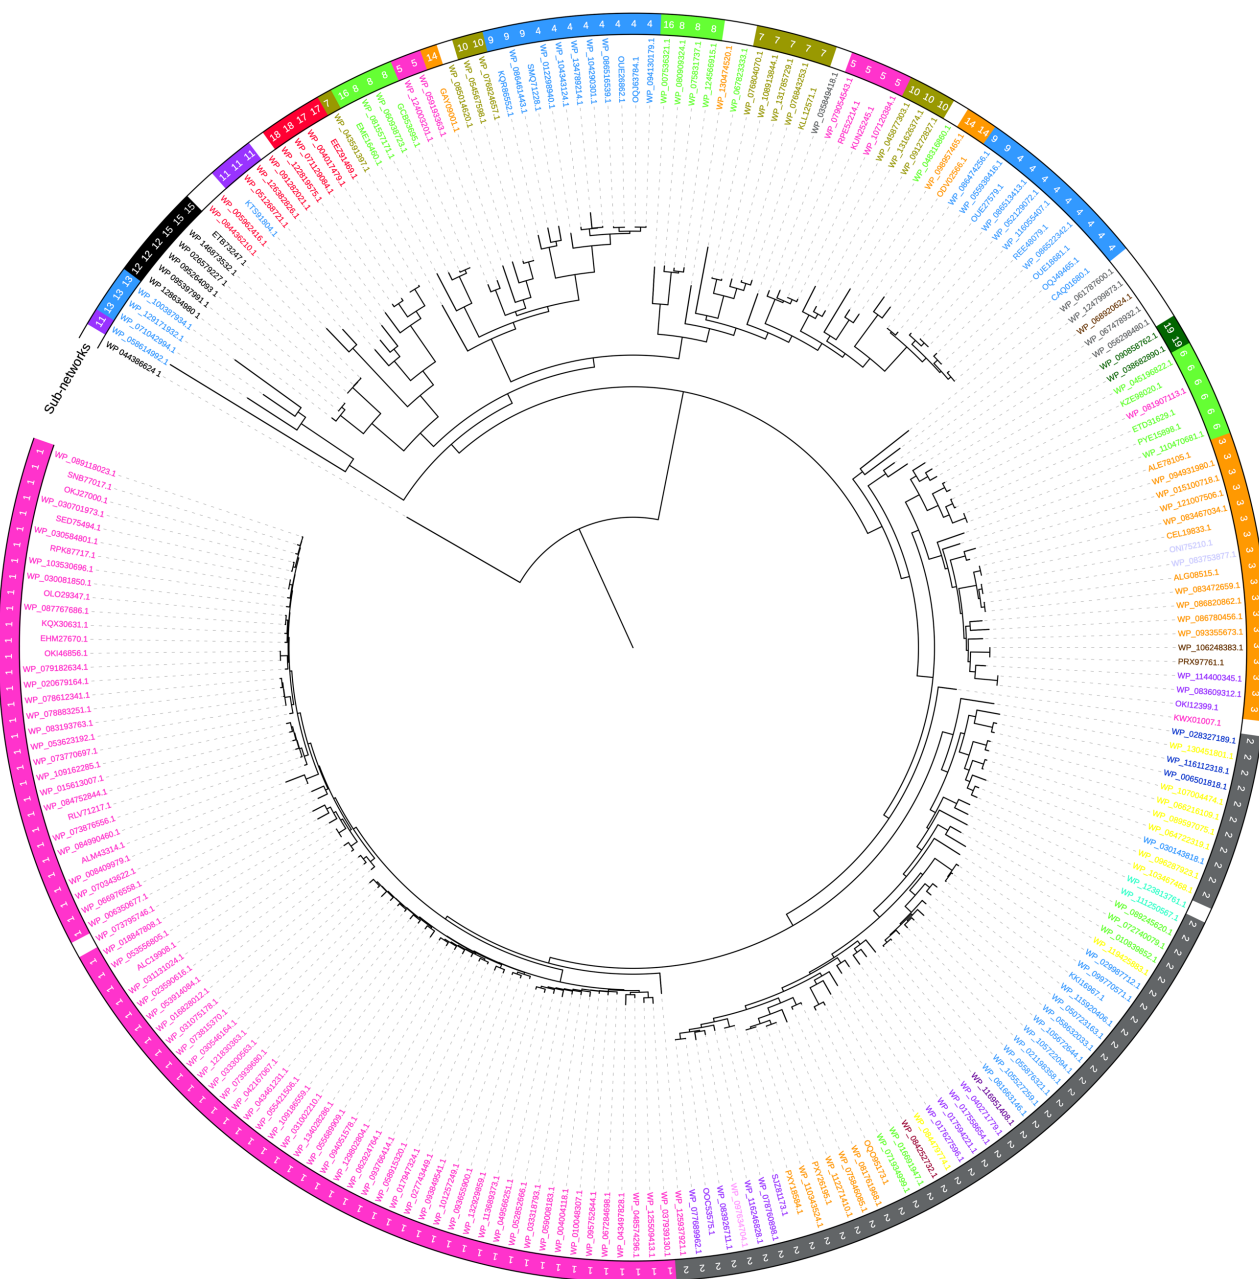

**Figure S6** Maximum likelihood tree of YcaO proteins associated with network 1 of putative precursor peptides. The tree is rooted using WP\_044386624.1 as an outgroup. Precursor peptide sub-networks (80% identity networks from Figure S5) are mapped as an outer colour strip that is labelled with the sub-network number. This is colour-coded according to the dominant bacterial family within each sub-network (colour coding as in Figure S5), with the exception of sub-network 2, which consists of diverse bacterial families. Tree labels are colour-coded by bacterial family. This shows that precursor peptides appear to have co-evolved with their cognate YcaO. Note that a small number of peptides do not network with the 80% identity cut-off and are therefore unlabelled on the colour strip. Figure generated using iTOL<sup>7</sup>.



# A

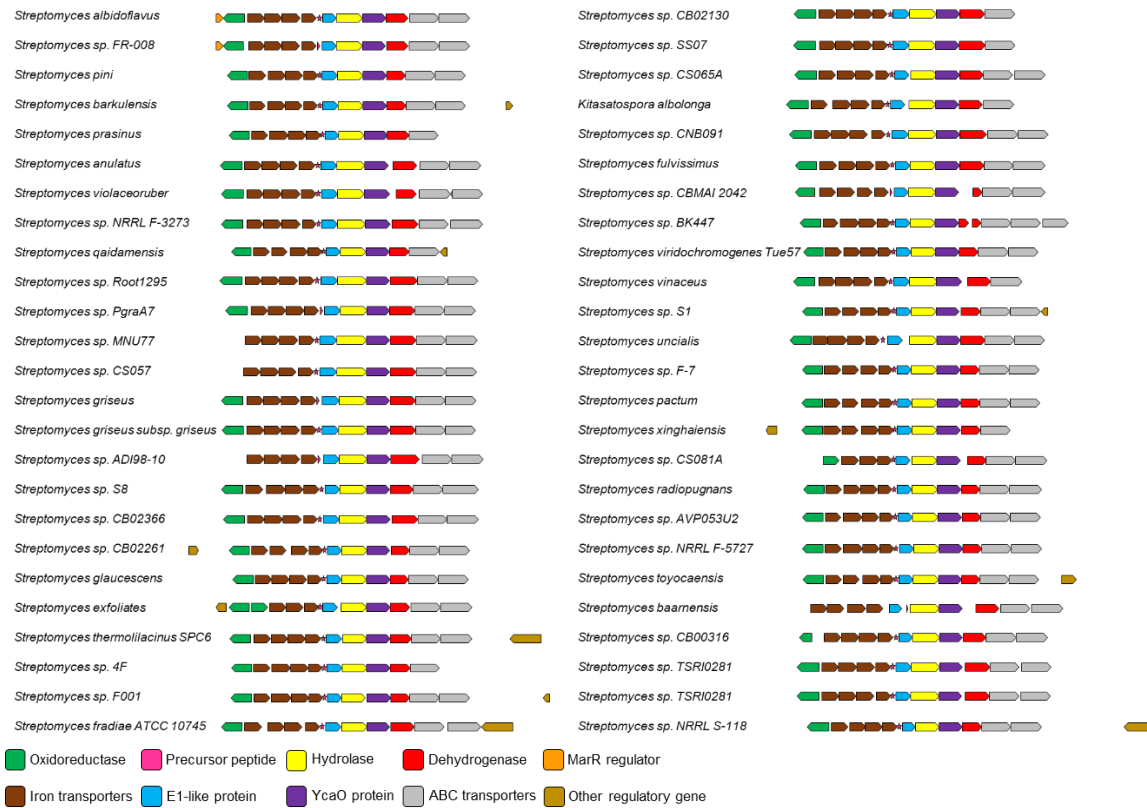

# B

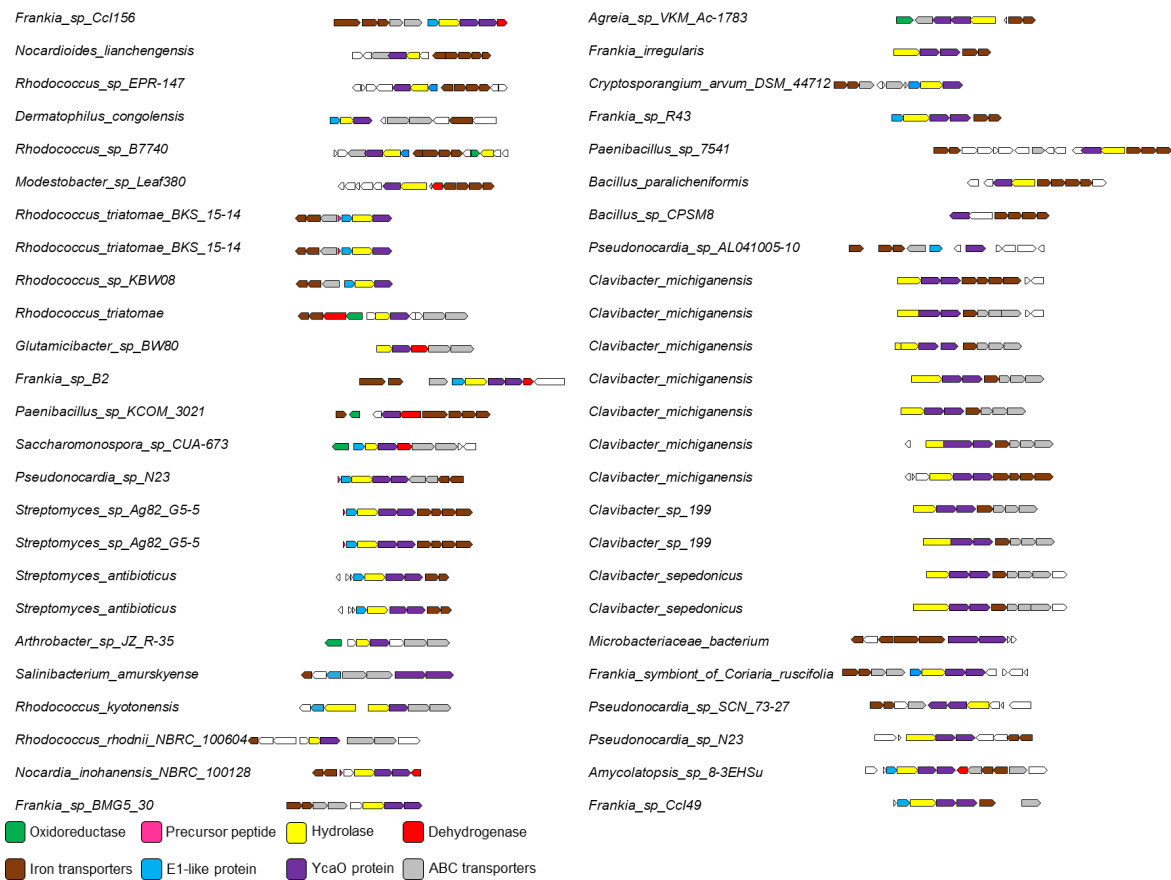

**Figure S7 (previous page)** A. First 50 examples of homologous gene clusters identified by MultiGeneBlast<sup>17</sup> analysis of the *S. albidoflavus* BGC. The core set of putative biosynthetic genes are present in all examples, which are predominantly from the *Streptomyces* genus and are associated with precursor peptides containing motif A. Surrounding genes that do not have predicted biosynthetic function within the RiPP biosynthetic pathway have been omitted, with the exception of genes annotated as having a regulatory function. B. BGCs 151-200 identified from MultiGeneBlast analysis of the *S. albidoflavus* BGC. These BGC examples are distinct from the first 50 examples, as many encode two YcaO proteins, additional hypothetical proteins (in white), and generally lack the *amiE*, *amiB* and *amiX* genes. Additionally, this subset of BGCs is usually associated with precursor peptides containing motif B.

**A**

| Ion m/z | RT / min | WT1     | WT2     | WT3     | WT4     | Mutant1 | Mutant2 | Mutant3 | Mutant4 |
|---------|----------|---------|---------|---------|---------|---------|---------|---------|---------|
| 324.67  | 1.34     | 1628169 | 1565001 | 2311187 | 2186366 | 0       | 0       | 0       | 0       |
| 290.16  | 0.92     | 1783434 | 2104341 | 1970184 | 2186366 | 154724  | 0       | 0       | 0       |
| 324.67  | 1.74     | 1901830 | 1929963 | 2040364 | 1981539 | 0       | 0       | 0       | 0       |
| 324.67  | 2.59     | 809435  | 1254146 | 1371572 | 1559192 | 0       | 0       | 0       | 0       |
| 338.18  | 1.35     | 959988  | 1359900 | 989904  | 994114  | 0       | 0       | 0       | 131368  |
| 320.17  | 0.88     | 491922  | 553274  | 574435  | 585459  | 0       | 0       | 0       | 0       |
| 497.38  | 1.74     | 372300  | 544327  | 573968  | 494952  | 0       | 0       | 0       | 0       |
| 547.33  | 2.60     | 305683  | 460096  | 454254  | 527232  | 0       | 0       | 0       | 0       |
| 251.15  | 0.91     | 291034  | 353716  | 375759  | 330858  | 0       | 0       | 0       | 0       |
| 510.27  | 2.52     | 267676  | 308829  | 307114  | 259442  | 0       | 0       | 0       | 0       |
| 290.16  | 1.79     | 190600  | 242783  | 300188  | 303723  | 0       | 0       | 0       | 0       |
| 320.17  | 1.34     | 197785  | 251864  | 229493  | 225336  | 0       | 0       | 0       | 0       |
| 329.17  | 2.69     | 187811  | 285428  | 180111  | 188850  | 0       | 0       | 0       | 0       |
| 315.17  | 1.74     | 147017  | 179590  | 175624  | 143522  | 0       | 0       | 0       | 0       |
| 290.16  | 2.56     | 117759  | 182052  | 168519  | 151214  | 0       | 0       | 0       | 0       |
| 356.18  | 1.09     | 151608  | 165779  | 122061  | 156647  | 0       | 0       | 0       | 0       |
| 324.67  | 2.83     | 121792  | 118528  | 121152  | 154880  | 0       | 0       | 0       | 0       |
| 359.21  | 2.12     | 135010  | 113220  | 120006  | 120660  | 0       | 0       | 0       | 0       |

ION COUNTS

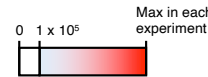

Max in each experiment

KEY

- Compound reported in this study
- In-source MS fragment of reported compound
- Potential BGC-associated molecule

**B**

| Ion m/z | RT / min | SalbC1  | SalbC2  | ΔamiA1 | ΔamiA2 | ΔamiA3 | ΔamiB1 | ΔamiB2 | ΔamiB3 | ΔamiC1 | ΔamiC2 | ΔamiC3 | ΔamiD1 | ΔamiD2 | ΔamiD3 | ΔamiE1  | ΔamiE2  | ΔamiE3  | ΔamiX1  | ΔamiX2  | ΔamiX3  |
|---------|----------|---------|---------|--------|--------|--------|--------|--------|--------|--------|--------|--------|--------|--------|--------|---------|---------|---------|---------|---------|---------|
| 314.17  | 3.03     | 1042037 | 847530  | 0      | 0      | 0      | 0      | 0      | 0      | 0      | 0      | 0      | 0      | 0      | 0      | 1605224 | 2048790 | 1588020 | 2625272 | 2569195 | 2451654 |
| 272.16  | 2.98     | 387710  | 410005  | 0      | 0      | 0      | 0      | 0      | 0      | 0      | 0      | 0      | 0      | 0      | 0      | 796578  | 1351619 | 943842  | 1570774 | 1699116 | 1560029 |
| 332.16  | 3.02     | 393459  | 329963  | 0      | 0      | 0      | 0      | 0      | 0      | 0      | 0      | 0      | 0      | 0      | 0      | 887866  | 1116939 | 712023  | 1980880 | 1813192 | 1396092 |
| 324.17  | 1.40     | 2989278 | 2218978 | 0      | 0      | 0      | 0      | 0      | 0      | 0      | 0      | 0      | 0      | 0      | 0      | 0       | 0       | 0       | 1057241 | 1172300 | 1138622 |
| 238.16  | 3.02     | 317850  | 252299  | 0      | 0      | 0      | 0      | 0      | 0      | 0      | 0      | 0      | 0      | 0      | 0      | 542292  | 723234  | 471398  | 1353022 | 1193970 | 991815  |
| 510.27  | 1.55     | 1475999 | 1171449 | 0      | 0      | 0      | 0      | 0      | 0      | 0      | 0      | 0      | 0      | 0      | 0      | 0       | 0       | 0       | 810404  | 763166  | 660021  |
| 354.16  | 3.03     | 280038  | 252484  | 0      | 0      | 0      | 0      | 0      | 0      | 0      | 0      | 0      | 0      | 0      | 0      | 443885  | 483075  | 389179  | 649966  | 604358  | 585720  |
| 252.68  | 2.59     | 0       | 0       | 0      | 0      | 0      | 805274 | 823917 | 750249 | 652656 | 0      | 0      | 0      | 0      | 0      | 0       | 0       | 0       | 0       | 0       | 0       |
| 731.49  | 5.88     | 0       | 0       | 0      | 0      | 0      | 472995 | 414900 | 387367 | 483298 | 185884 | 593732 | 0      | 0      | 0      | 0       | 0       | 0       | 0       | 0       | 0       |
| 534.28  | 0.94     | 0       | 0       | 0      | 0      | 0      | 535754 | 340404 | 311922 | 409839 | 462929 | 279795 | 0      | 0      | 0      | 0       | 0       | 0       | 0       | 0       | 0       |
| 292.18  | 2.79     | 0       | 0       | 0      | 0      | 0      | 480894 | 308963 | 334050 | 429287 | 187481 | 358979 | 0      | 0      | 0      | 0       | 0       | 0       | 0       | 0       | 0       |
| 301.71  | 2.68     | 0       | 113920  | 0      | 0      | 0      | 0      | 0      | 0      | 0      | 0      | 0      | 0      | 0      | 0      | 528479  | 618234  | 613954  | 0       | 0       | 0       |
| 647.32  | 1.39     | 544662  | 545338  | 0      | 0      | 0      | 0      | 0      | 0      | 0      | 0      | 0      | 0      | 0      | 0      | 0       | 0       | 0       | 290000  | 237703  | 223171  |
| 753.48  | 5.89     | 0       | 0       | 0      | 0      | 0      | 330045 | 334540 | 286914 | 278207 | 135959 | 390631 | 0      | 0      | 0      | 0       | 0       | 0       | 0       | 0       | 0       |
| 414.69  | 1.63     | 498706  | 567594  | 0      | 0      | 0      | 0      | 0      | 0      | 309065 | 0      | 0      | 0      | 0      | 0      | 0       | 0       | 0       | 179712  | 206891  | 210799  |
| 572.27  | 2.91     | 0       | 220338  | 0      | 0      | 0      | 0      | 0      | 0      | 0      | 0      | 0      | 240054 | 235837 | 200915 | 0       | 207047  | 0       | 0       | 0       | 206488  |

**C**

| Ion m/z | RT / min | SalbC1  | SalbC2  | SalbC3  | ΔamiA1 | ΔamiA2 | ΔamiA3 | ΔamiF1 | ΔamiF2 | ΔamiF3 | ΔamiT1 | ΔamiT2 | Δoxy1   | Δoxy2   | ΔmarR1  | ΔmarR2  | ΔmarR3  | Δmetred1 | Δmetred2 | Δmetred3 | ΔacyIT1 | ΔacyIT2 |
|---------|----------|---------|---------|---------|--------|--------|--------|--------|--------|--------|--------|--------|---------|---------|---------|---------|---------|----------|----------|----------|---------|---------|
| 334.17  | 1.34     | 2262502 | 2715880 | 2252975 | 0      | 0      | 0      | 0      | 0      | 0      | 389484 | 206483 | 2638215 | 3658376 | 3931198 | 2664038 | 4194082 | 3046506  | 2325230  | 2642271  | 2908474 | 129689  |
| 324.67  | 1.34     | 1492098 | 1353940 | 1455540 | 0      | 0      | 0      | 0      | 0      | 0      | 134003 | 0      | 1589077 | 2033893 | 2322951 | 1784058 | 2506411 | 1742056  | 1510709  | 1510224  | 1693574 | 0       |
| 414.69  | 1.58     | 1181609 | 1645592 | 1047319 | 0      | 0      | 0      | 0      | 0      | 0      | 363852 | 290531 | 1451534 | 1318812 | 1240448 | 1324889 | 1337093 | 1704719  | 1659297  | 1820455  | 809350  | 379525  |
| 415.19  | 1.58     | 647608  | 979697  | 518697  | 0      | 0      | 0      | 0      | 0      | 0      | 204596 | 150095 | 714917  | 663617  | 595986  | 641513  | 867811  | 791543   | 1048942  | 944463   | 519469  | 208578  |
| 405.69  | 1.94     | 204544  | 473083  | 449510  | 0      | 0      | 0      | 0      | 0      | 0      | 279087 | 349649 | 488894  | 521578  | 724514  | 443171  | 529039  | 575600   | 634771   | 456094   | 421526  | 0       |
| 607.34  | 4.90     | 0       | 0       | 0       | 0      | 0      | 0      | 0      | 0      | 0      | 661060 | 585094 | 405660  | 453464  | 0       | 0       | 0       | 0        | 0        | 0        | 1448119 | 1570290 |
| 324.67  | 1.34     | 513445  | 724674  | 437623  | 0      | 0      | 0      | 0      | 0      | 0      | 0      | 0      | 447968  | 462424  | 582933  | 555897  | 579071  | 508534   | 523511   | 408688   | 407028  | 0       |
| 405.69  | 1.58     | 279291  | 392327  | 179786  | 0      | 0      | 0      | 0      | 0      | 0      | 0      | 0      | 316325  | 346105  | 292673  | 320717  | 341332  | 416925   | 564351   | 353123   | 202526  | 0       |
| 272.16  | 2.92     | 257894  | 387278  | 284473  | 0      | 0      | 0      | 0      | 0      | 0      | 338726 | 253540 | 227157  | 309806  | 327270  | 286979  | 364493  | 179404   | 253616   | 202020   | 112176  | 0       |
| 510.27  | 1.50     | 104359  | 294043  | 110043  | 0      | 0      | 0      | 0      | 0      | 0      | 0      | 0      | 167448  | 222399  | 1113021 | 288230  | 524694  | 168387   | 126083   | 131314   | 300238  | 0       |
| 406.19  | 1.94     | 203053  | 238427  | 179119  | 0      | 0      | 0      | 0      | 0      | 0      | 190795 | 189693 | 272956  | 274319  | 350573  | 235753  | 298792  | 304645   | 302031   | 198489   | 166590  | 0       |
| 290.16  | 1.32     | 197753  | 216467  | 152115  | 0      | 0      | 0      | 0      | 0      | 0      | 0      | 0      | 177502  | 227549  | 310417  | 202821  | 348978  | 224991   | 167021   | 185888   | 216711  | 0       |
| 355.45  | 5.98     | 0       | 0       | 0       | 0      | 0      | 0      | 139416 | 270140 | 298996 | 119115 | 157407 | 0       | 0       | 0       | 0       | 0       | 127475   | 166995   | 126728   | 0       | 243550  |
| 843.38  | 4.41     | 160391  | 143875  | 116861  | 0      | 0      | 0      | 119398 | 129183 | 195715 | 128757 | 148272 | 0       | 0       | 0       | 0       | 0       | 0        | 0        | 0        | 0       | 157425  |
| 619.33  | 3.63     | 0       | 0       | 0       | 0      | 0      | 0      | 765322 | 752744 | 691650 | 0      | 0      | 0       | 0       | 0       | 0       | 0       | 0        | 0        | 0        | 0       | 0       |
| 708.38  | 4.82     | 0       | 0       | 0       | 0      | 0      | 0      | 0      | 0      | 1650   | 165798 | 291112 | 0       | 0       | 0       | 0       | 0       | 144121   | 0        | 0        | 0       | 430029  |
| 314.17  | 2.97     | 0       | 167284  | 0       | 0      | 0      | 0      | 0      | 0      | 0      | 0      | 0      | 0       | 167189  | 465471  | 237824  | 360018  | 175044   | 129755   | 137679   | 146284  | 0       |
| 251.15  | 1.34     | 227258  | 241712  | 139190  | 0      | 0      | 0      | 0      | 0      | 0      | 0      | 0      | 218172  | 289739  | 0       | 184452  | 0       | 171103   | 168619   | 138027   | 171547  | 0       |

**Figure S8** Comparative LC-MS data acquired using a Shimadzu IT-TOF and processed using Profiling Solution (Shimadzu). Numbers reflect ion intensities as calculated using Profiling Solution and most abundant ions are shown in each panel. Columns represent independent cultures. A. *S. albidoflavus* J1074 wild type versus pathway-disrupted *S. albidoflavus* J1074 mutant. Retention times differ to other experiments due to different chromatography conditions for this analysis. B. *S. coelicolor* M1146-pCAPSalbC versus biosynthetic gene mutants:  $\Delta amiA$ ,  $\Delta amiB$ ,  $\Delta amiC$ ,  $\Delta amiD$ ,  $\Delta amiE$  and  $\Delta amiX$ . C. *S. coelicolor* M1146-pCAPSalbC versus mutants of other genes cloned in pCAPSalbC: iron transporter deletion ( $\Delta amiF$ ), ABC transporter deletion ( $\Delta amiT$ ), oxygenase deletion ( $\Delta oxy$ ), MarR deletion ( $\Delta marR$ ), peptide methionine sulfoxide reductase deletion ( $\Delta metred$ ), and acetyltransferase deletion ( $\Delta acyIT$ ).

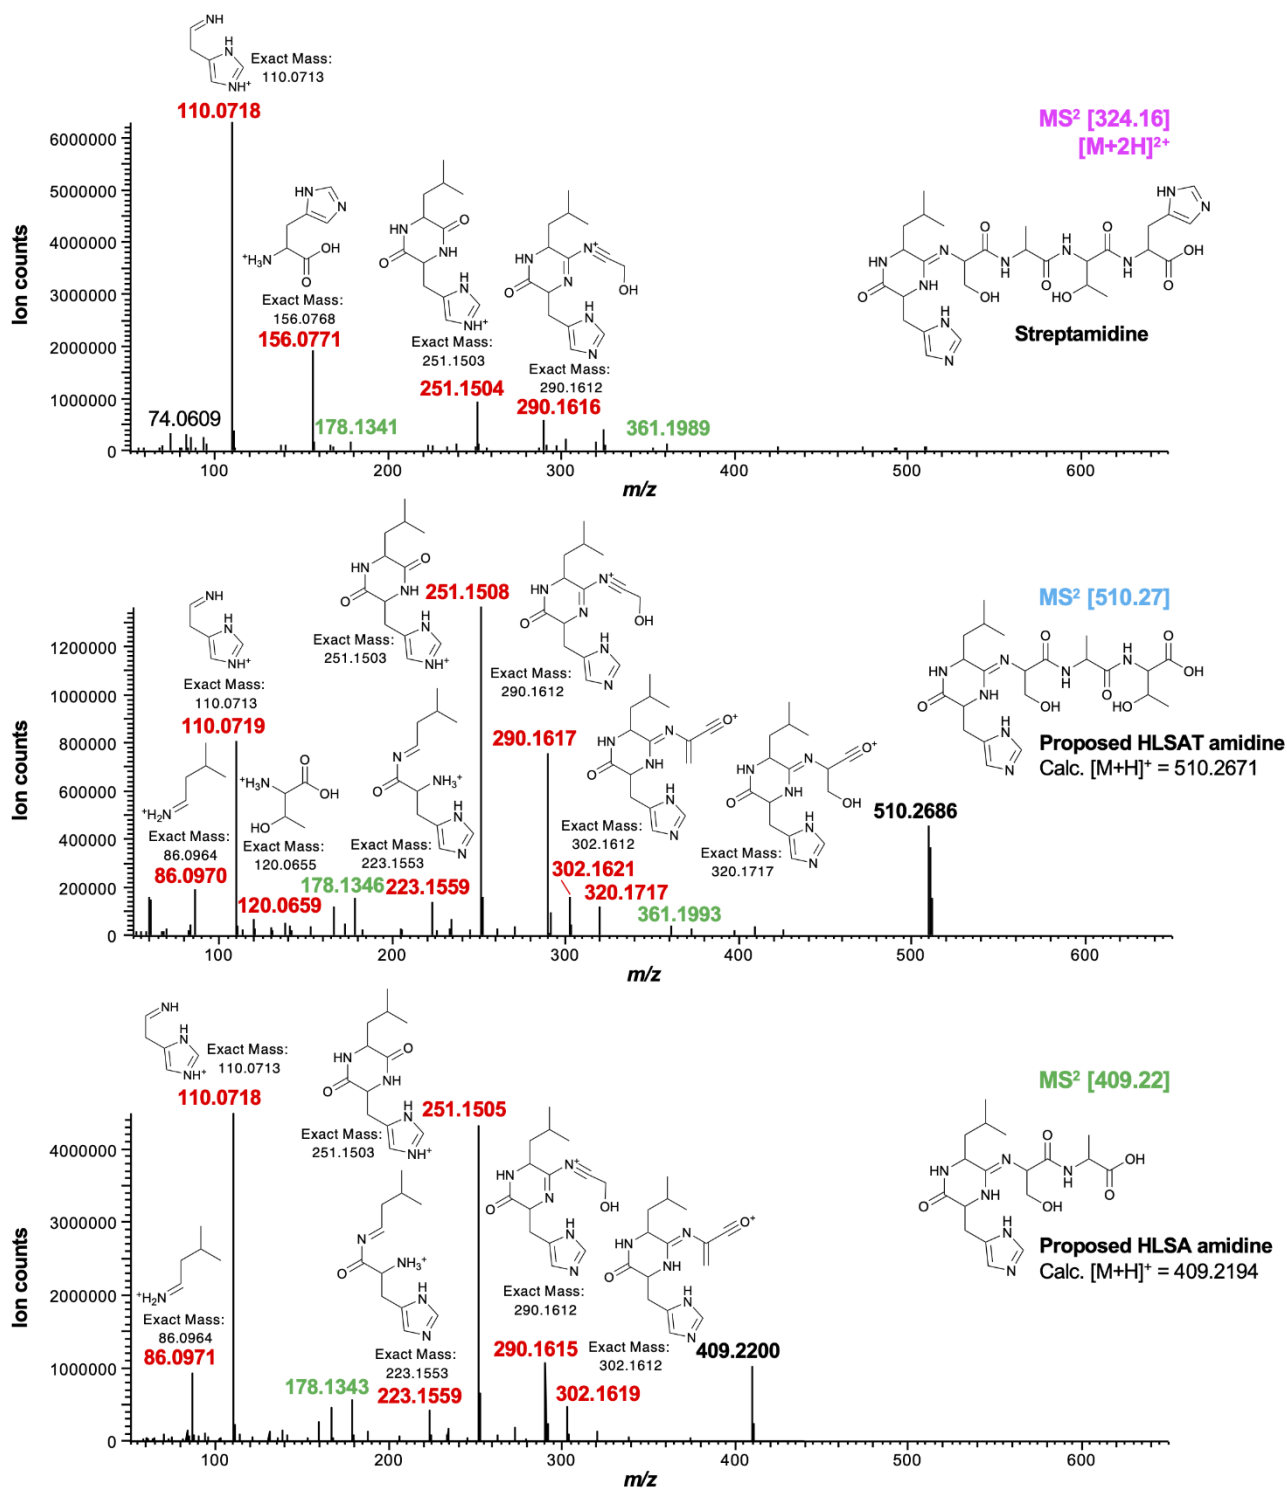

**Figure S9** Accurate MS/MS fragmentation data for streptomidine ( $m/z$  324.16), proposed HLSAT amidine ( $m/z$  510.27) and proposed HLSA amidine ( $m/z$  409.22), obtained using a Thermo Q-Exactive. Fragments with proposed structures are labelled in red, while unannotated fragments that are common to two or more spectra are labelled in green. Parent ions are labelled in black. The following fragments are common to all spectra:  $m/z$  110.07,  $m/z$  178.13,  $m/z$  251.15,  $m/z$  290.16.

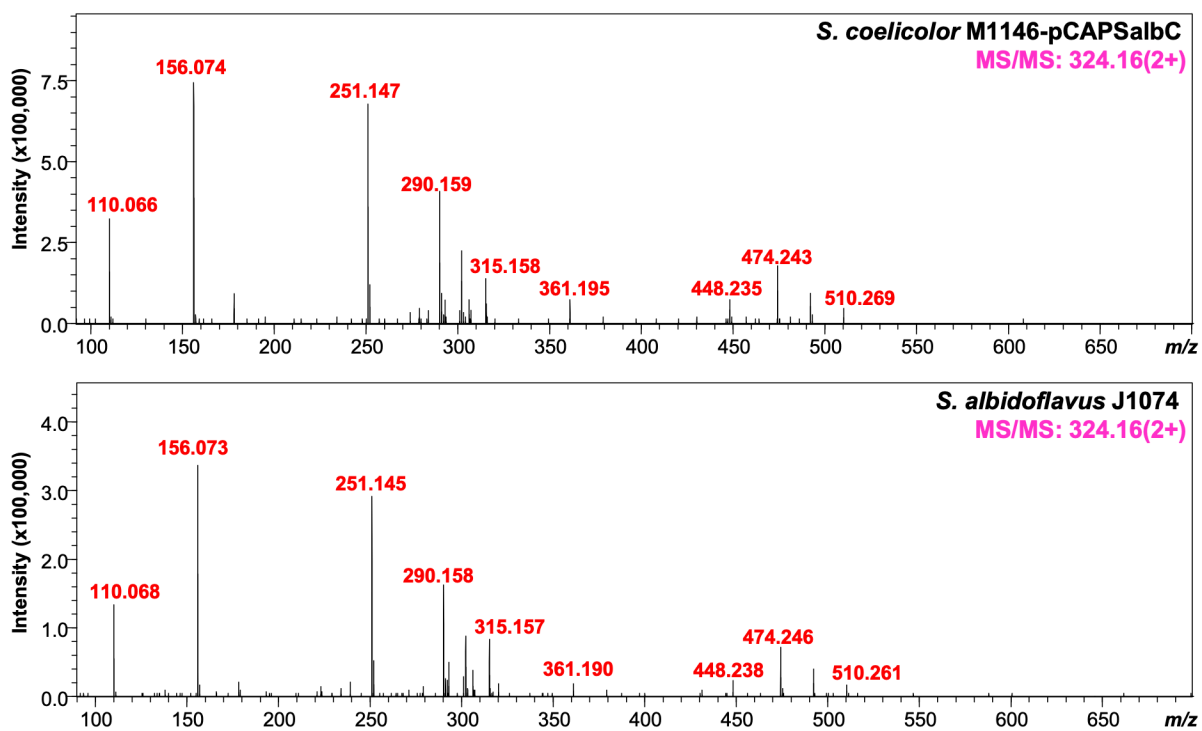

**Figure S10** MS/MS fragmentation data for streptomidine ( $m/z$  324.16,  $[M+2H]^{2+}$ ) from *S. coelicolor* M1146-pCAPSalbC and *S. albidoflavus* J1074. Spectra obtained on a Shimadzu IT-TOF.

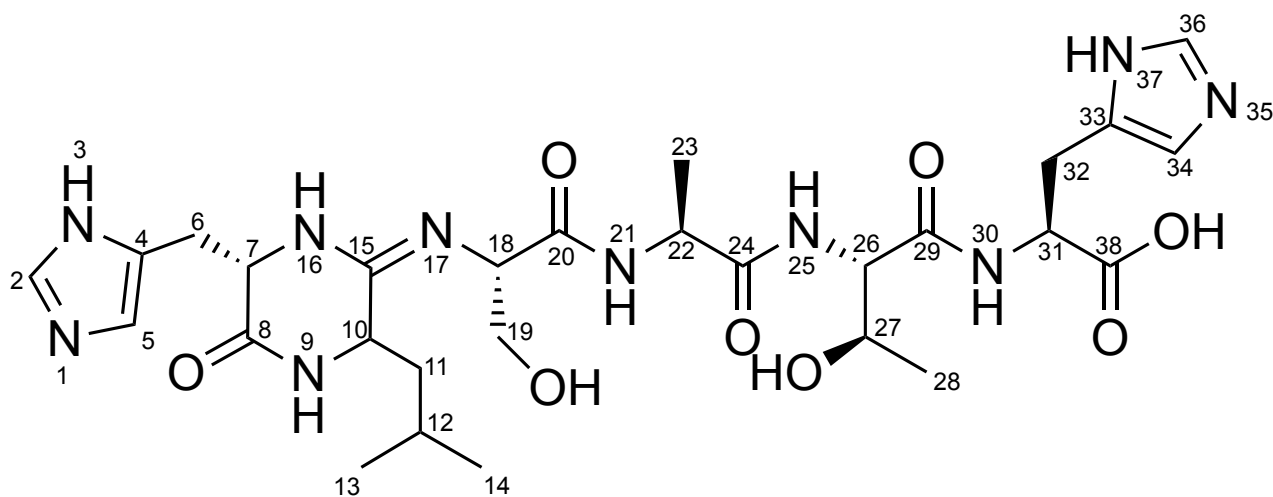

**Figure S11** Structure of streptomidine with numbered atoms.

**Table S9** NMR chemical shift assignments for streptomidine in DMSO-d<sub>6</sub>.

| C/N number | Amino acid | $\delta_c$ (ppm)   | $\delta_H$ (ppm)     | Multiplicity | Coupling constant (Hz)                                                                 |
|------------|------------|--------------------|----------------------|--------------|----------------------------------------------------------------------------------------|
| 1          | His1       | --                 | --                   | --           |                                                                                        |
| 2          | His1       | 134.7              | 7.48                 | s            |                                                                                        |
| 3          | His1       | --                 |                      |              |                                                                                        |
| 4          | His1       | 131.6 <sup>a</sup> | --                   | --           |                                                                                        |
| 5          | His1       | 121.0 <sup>b</sup> | 6.67                 | s            |                                                                                        |
| 6          | His1       | 32.6               | 2.84<br>2.75         | dd<br>dd     | $J_{6a,6b} = 14.1$ , $J_{6a,7} = 5.2$<br>$J_{6a,6b} = 14.1$ , $J_{6b,7} = 7.4$         |
| 7          | His1       | 58.8               | 3.95-3.91            | m            |                                                                                        |
| 8          | His1       | 170.7              | --                   | --           |                                                                                        |
| 9          | Leu2       | --                 | 8.05                 | s            |                                                                                        |
| 10         | Leu2       | 51.0               | 3.82                 | d            | $J_{10,11a} = 10.8$                                                                    |
| 11         | Leu2       | 45.9               | 1.41-1.35, 0.77-0.71 | m, m         |                                                                                        |
| 12         | Leu2       | 23.8               | 1.64-1.57            | m            |                                                                                        |
| 13         | Leu2       | 21.4               | 0.82                 | d            | $J_{12,13} = 6.4$                                                                      |
| 14         | Leu2       | 24.1               | 0.78                 | d            | $J_{12,14} = 6.6$                                                                      |
| 15         | Leu2       | 157.1              | --                   | --           |                                                                                        |
| 16         | His1       | --                 |                      |              |                                                                                        |
| 17         | Ser3       | --                 | --                   | --           |                                                                                        |
| 18         | Ser3       | 57.1               | 4.30-4.27            | m            |                                                                                        |
| 19         | Ser3       | 62.2               | 3.62                 | d            | $J_{18,19} = 5.9$                                                                      |
| 20         | Ser3       | 171.4              | --                   | --           |                                                                                        |
| 21         | Ala4       | --                 | 8.09                 | d            | $J_{21,22} = 7.0$                                                                      |
| 22         | Ala4       | 48.9               | 4.41-4.35            | m            |                                                                                        |
| 23         | Ala4       | 18.7               | 1.25                 | d            | $J_{22,23} = 7.1$                                                                      |
| 24         | Ala4       | 172.9              | --                   | --           |                                                                                        |
| 25         | Thr5       | --                 | 7.88                 | d            | $J_{25,26} = 8.6$                                                                      |
| 26         | Thr5       | 59.3               | 4.14                 | dd           | $J_{25,26} = 8.6$ , $J_{26,27} = 3.6$                                                  |
| 27         | Thr5       | 66.9               | 4.02-3.98            | m            |                                                                                        |
| 28         | Thr5       | 19.9               | 1.00                 | d            | $J_{27,28} = 6.3$                                                                      |
| 29         | Thr5       | 170.0              | --                   | --           |                                                                                        |
| 30         | His6       | --                 | 7.78                 | d            | $J_{30,31} = 7.5$                                                                      |
| 31         | His6       | 53.5               | 4.27-4.24            | m            |                                                                                        |
| 32         | His6       | 29.2               | 2.97<br>2.82         | dd<br>dd     | $J_{32a,32b} = 14.8$ , $J_{31,32a} = 5.1$<br>$J_{32a,32b} = 14.8$ , $J_{31,32b} = 7.4$ |
| 33         | His6       | 134.1 <sup>a</sup> | --                   | --           |                                                                                        |
| 34         | His6       | 117.1 <sup>b</sup> | 6.81                 | s            |                                                                                        |
| 35         | His6       | --                 | --                   | --           |                                                                                        |
| 36         | His6       | 135.1              | 7.54                 | s            |                                                                                        |
| 37         | His6       | --                 |                      | --           |                                                                                        |
| 38         | His6       | 173.1              | --                   | --           |                                                                                        |

a. <sup>13</sup>C chemical shifts for His1(4) and His6(33) were obtained from HMBC, and match literature values expected for corresponding carbons in the histidine ring<sup>32</sup>

b. <sup>13</sup>C chemical shifts for His1(5) and His6(34) were obtained from HMBC and HSQCed spectra, and match literature values expected for corresponding carbons in the histidine ring<sup>32</sup>

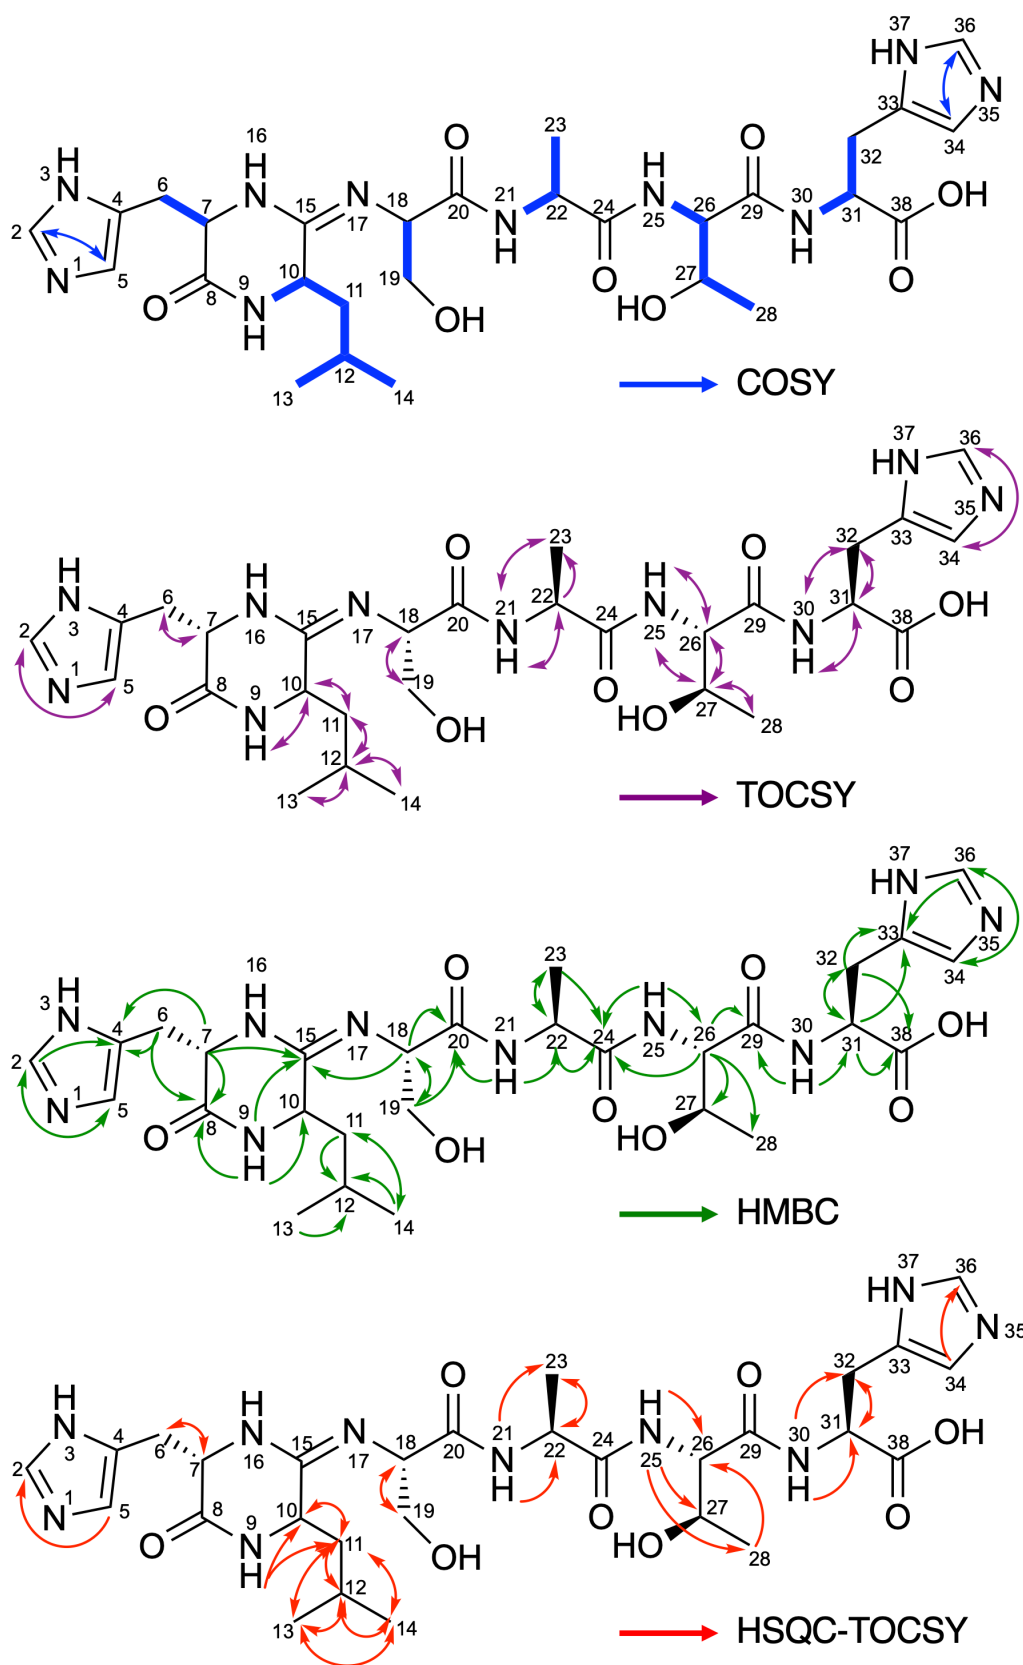

**Figure S12** NMR correlation data observed in 2D spectra (Figures S15 - S20). Double-headed arrows indicate where mutual correlations were observed; single-headed arrows to indicate where one-way correlations were observed (H to C).

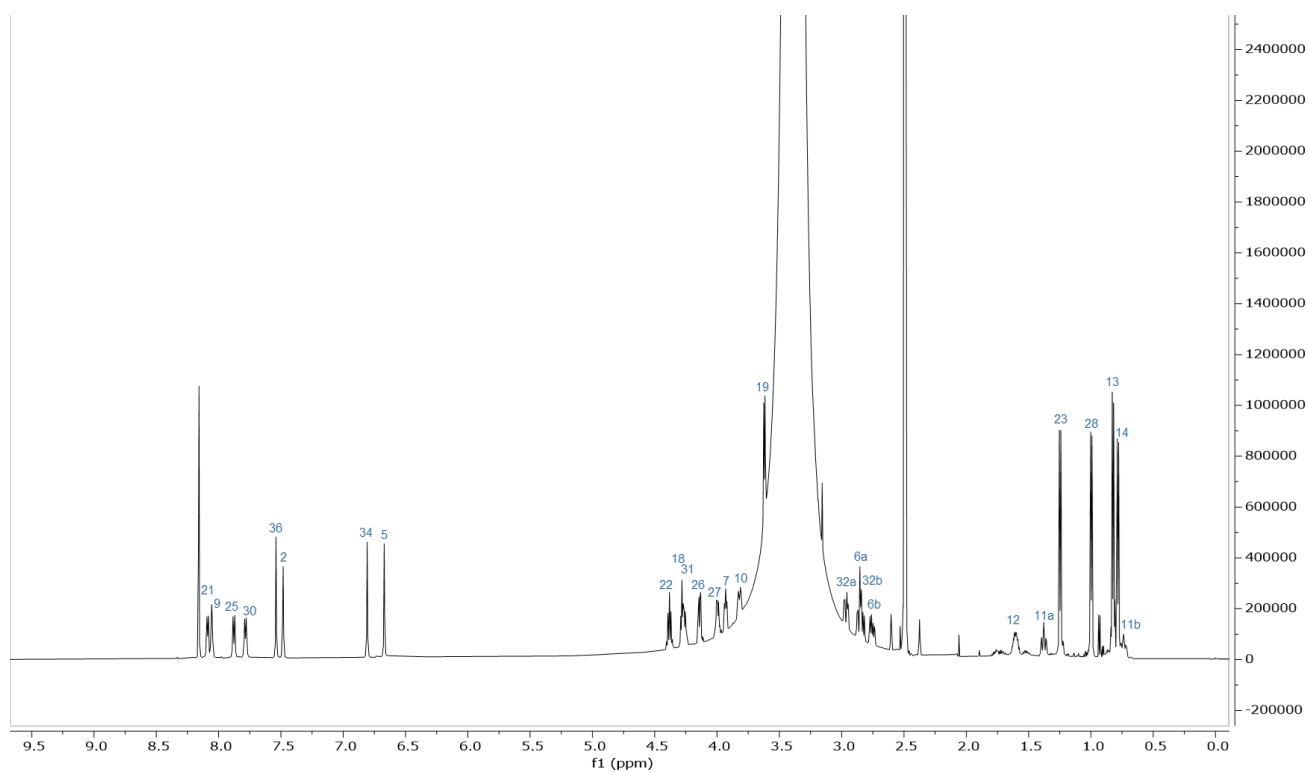

**Figure S13**  $^1\text{H}$  NMR spectrum (600 MHz,  $\text{DMSO-d}_6$ , 298 K) of streptomidine.

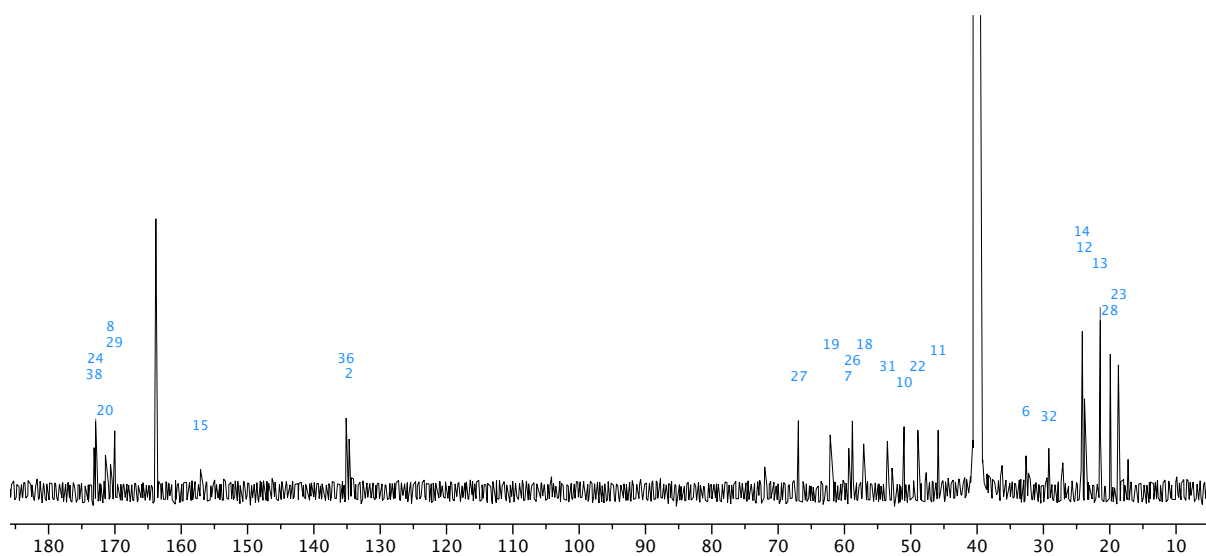

**Figure S14**  $^{13}\text{C}$  NMR spectrum (150 MHz,  $\text{DMSO-d}_6$ , 298 K) of streptomidine.



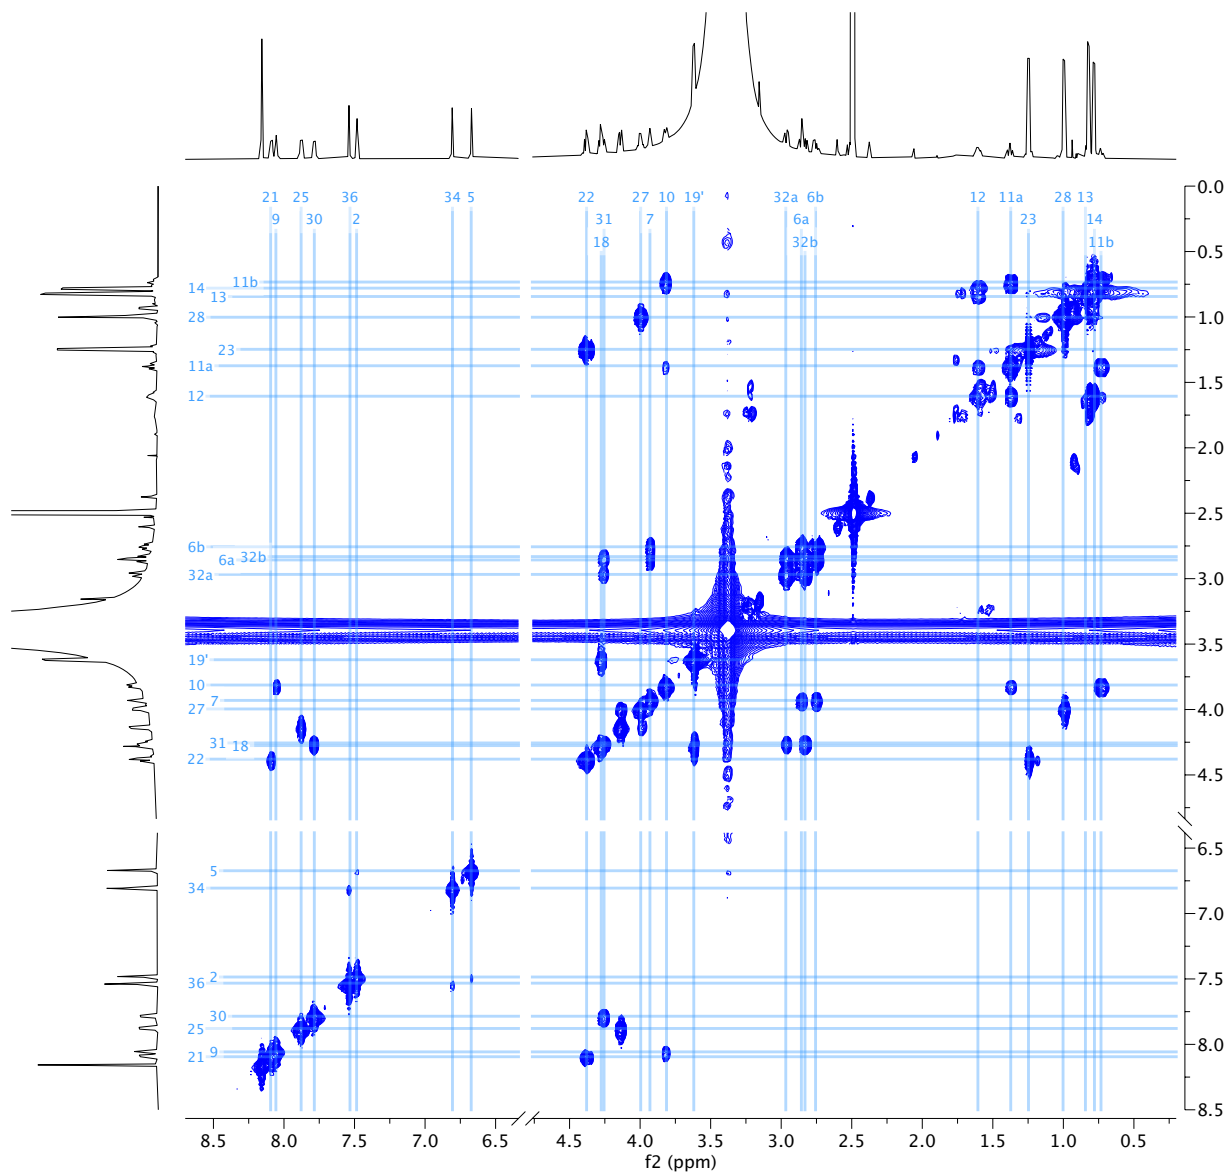

**Figure S15** 2D COSY spectrum (DMSO-d<sub>6</sub>, 298 K) of streptomidine.

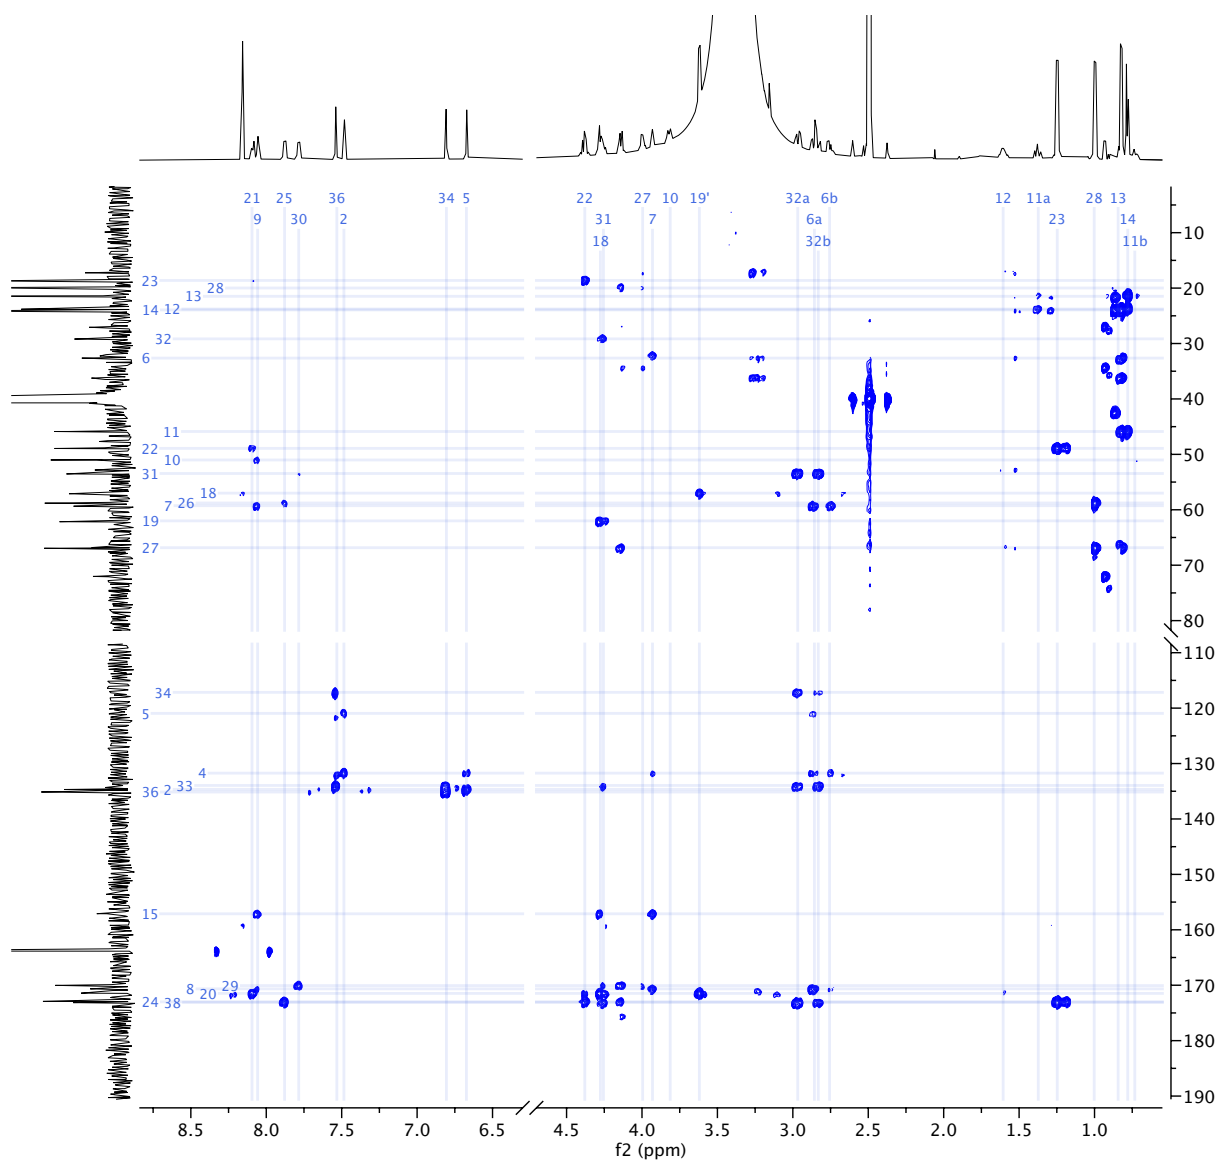

**Figure S16** 2D HMBC spectrum (DMSO-d<sub>6</sub>, 298 K) of streptomidine.

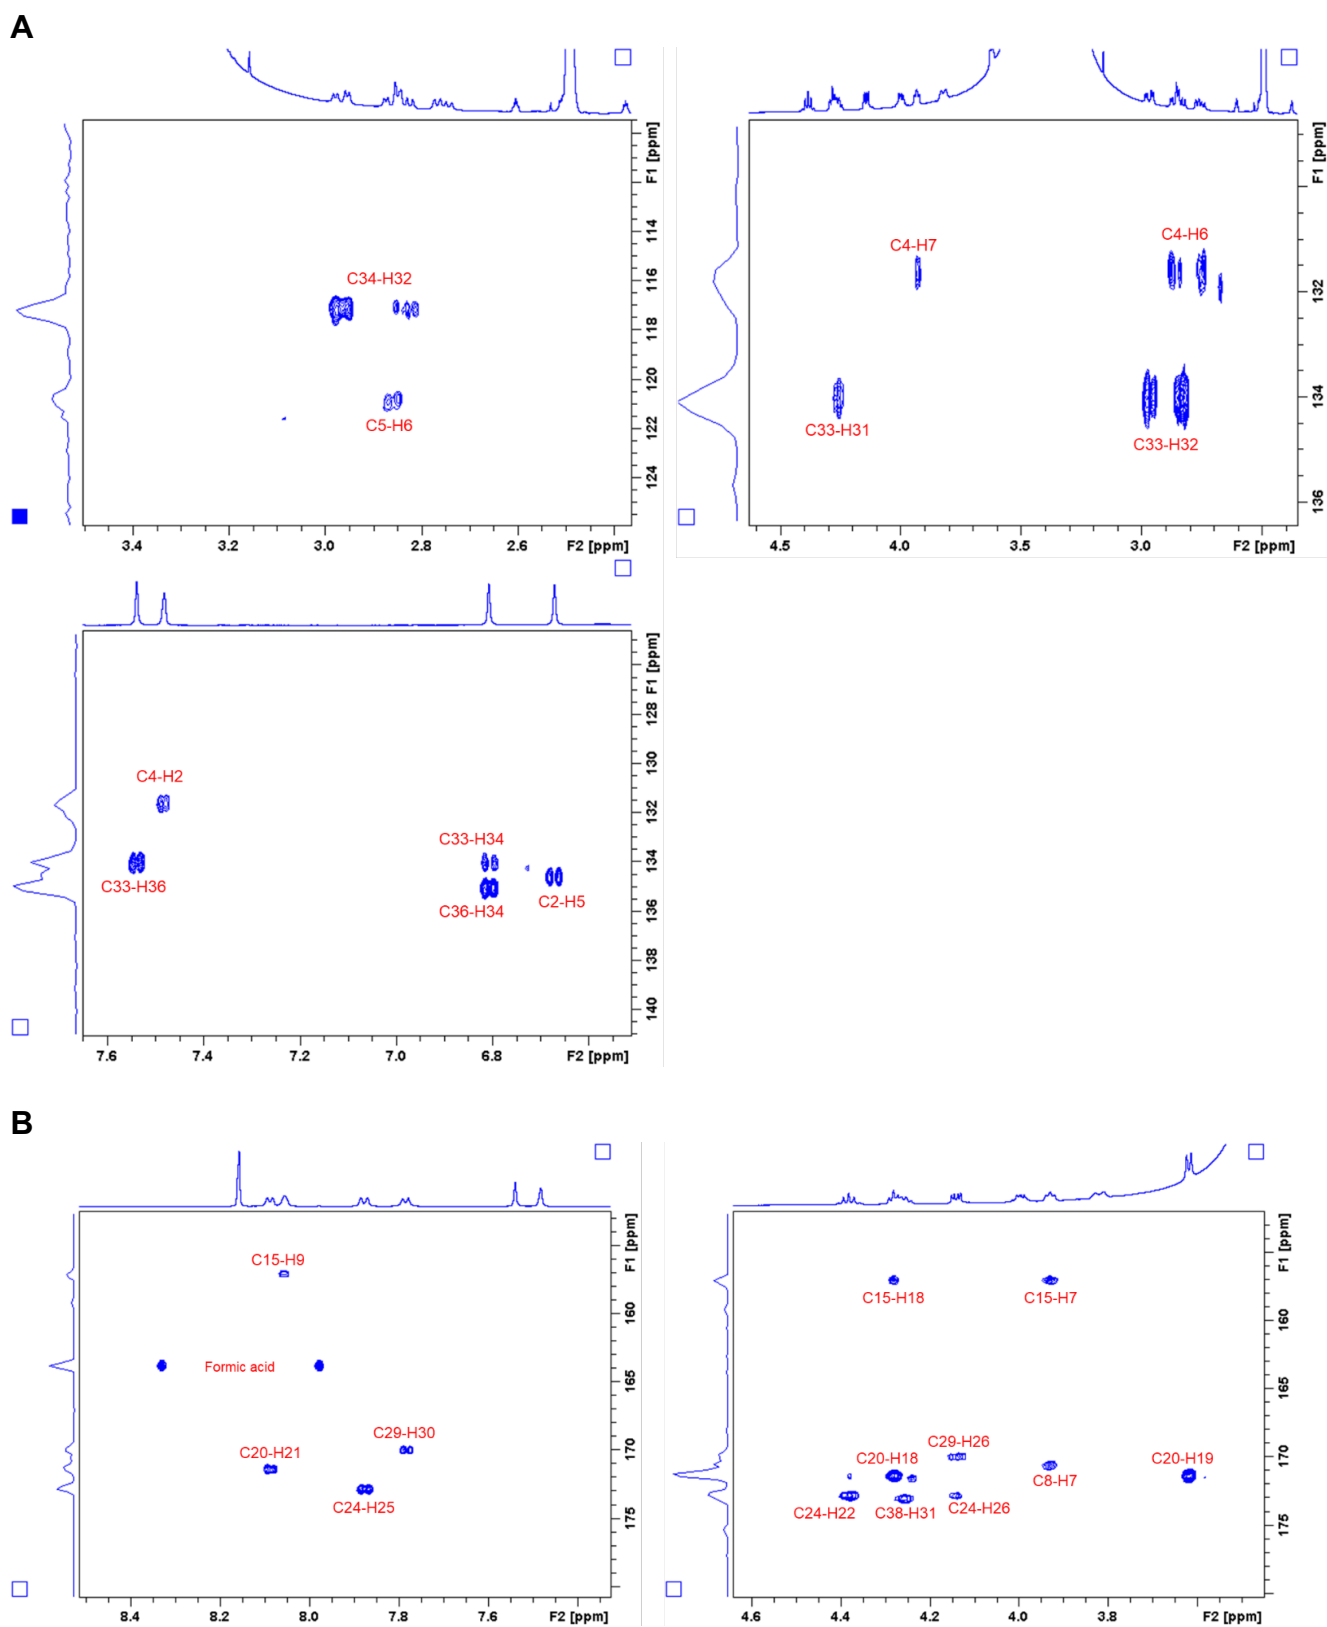

**Figure S17** Selected regions of 2D HMBC spectrum. A. Key correlations for histidine residues. B. Key correlations for amidine carbon and carbonyls.

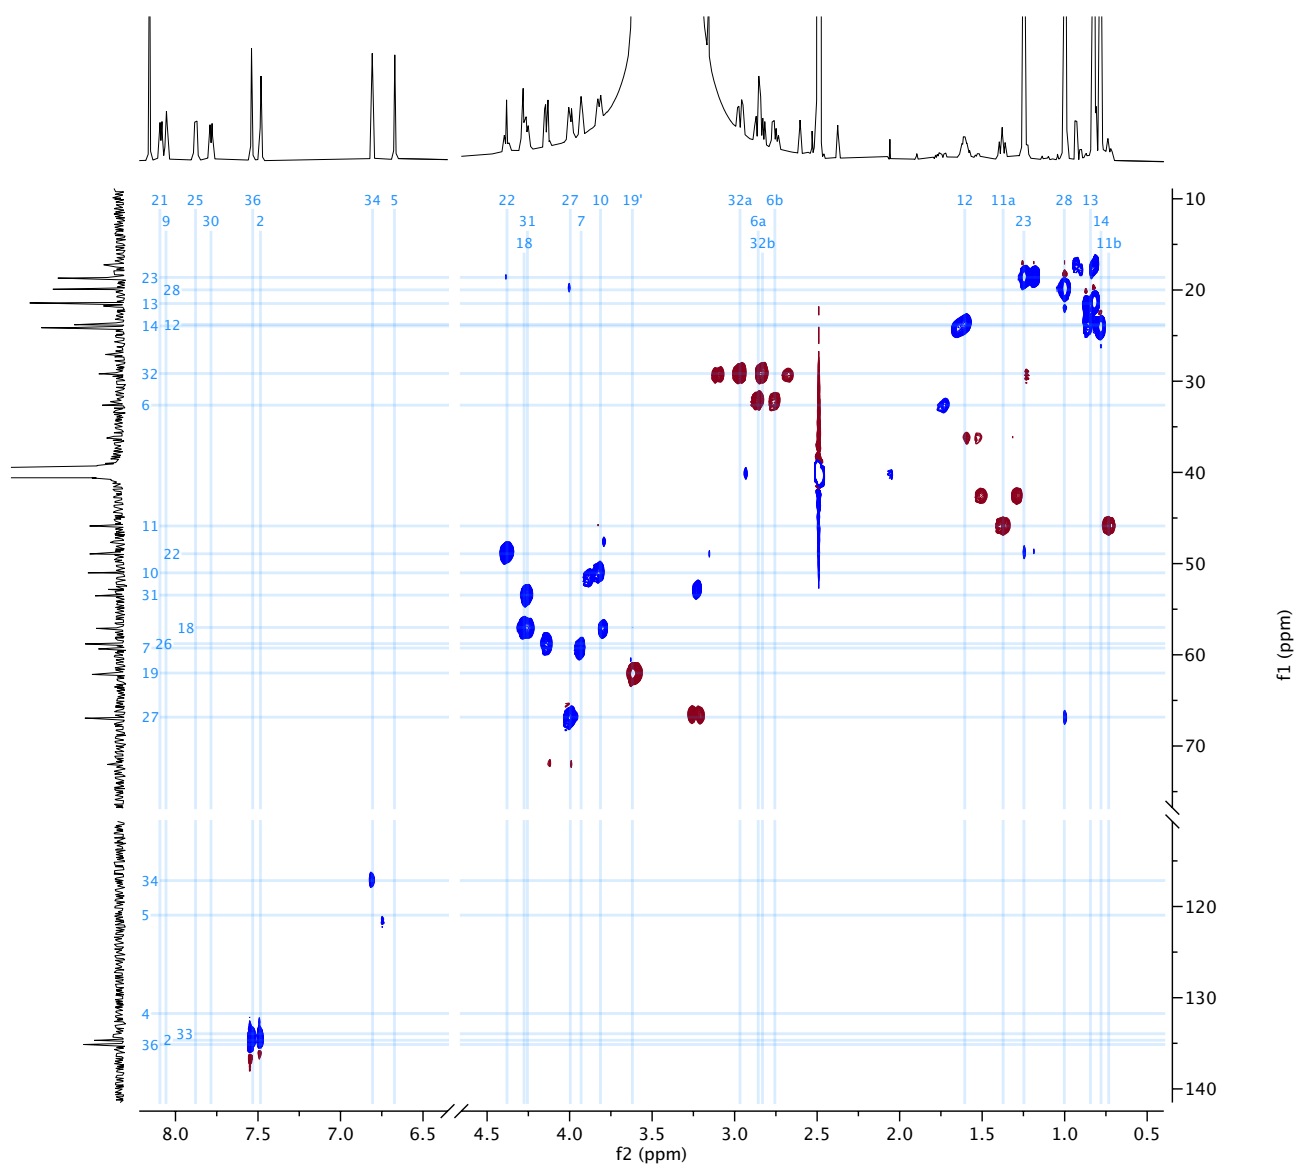

**Figure S18** 2D HSQCed spectrum (DMSO-d<sub>6</sub>, 298 K) of streptomidine.

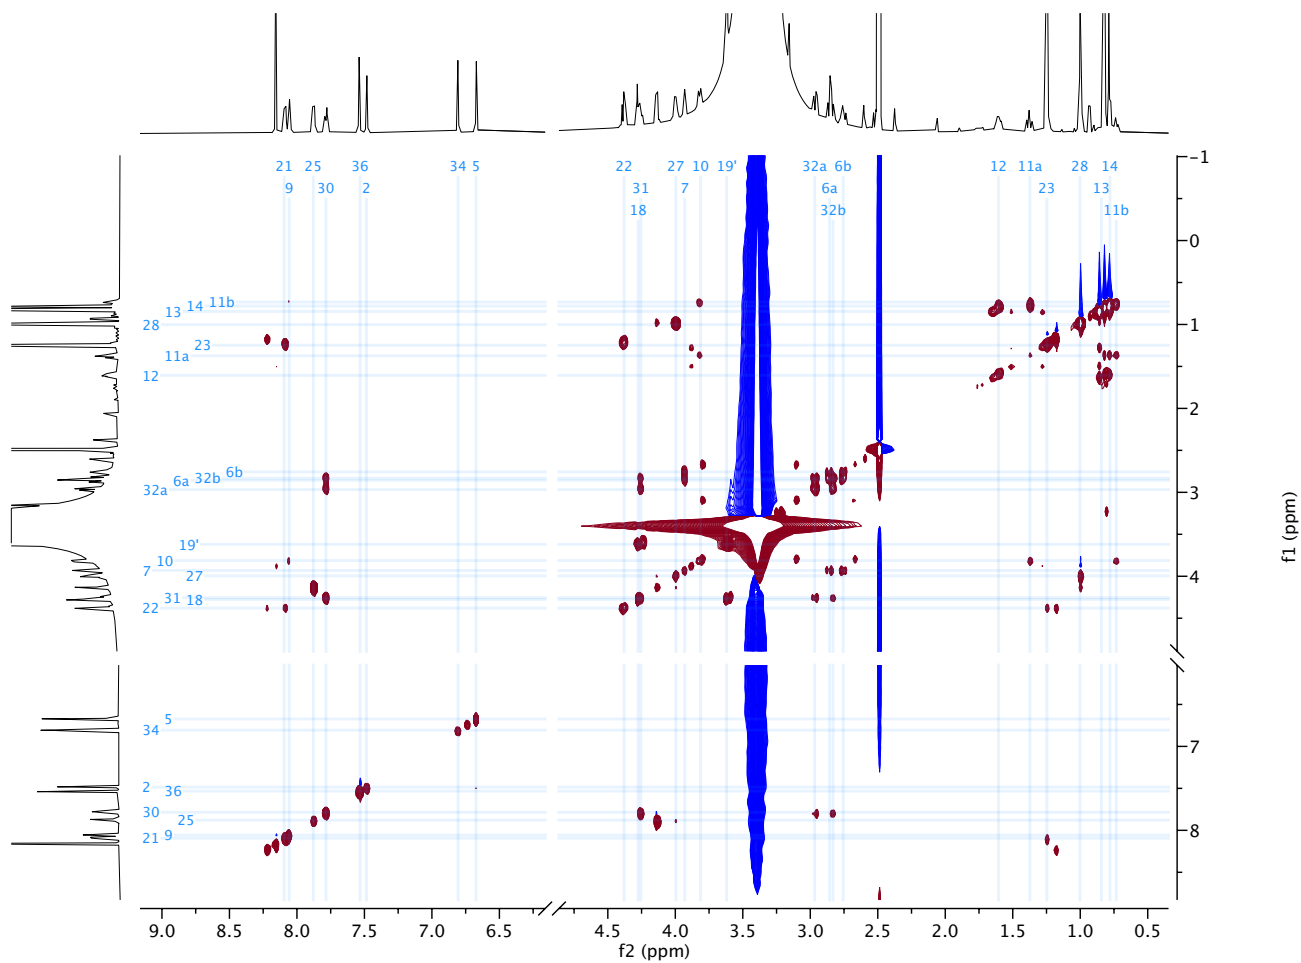

**Figure S19** 2D TOCSY spectrum (DMSO-d<sub>6</sub>, 298 K) of streptomidine.

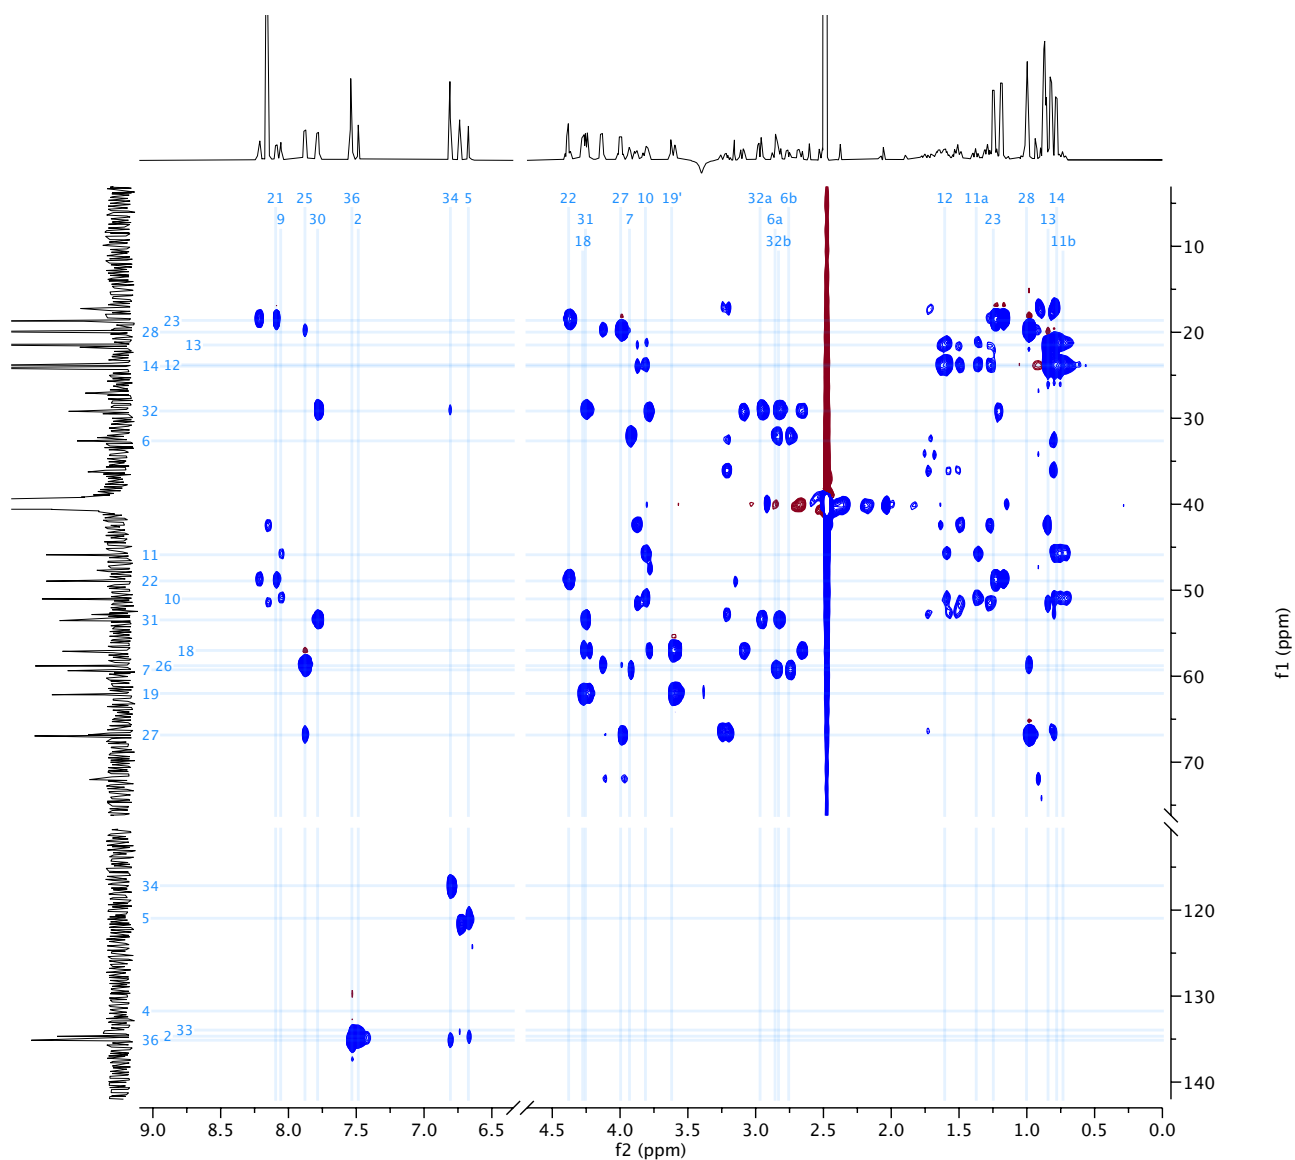

**Figure S20** 2D HSQC-TOCSY spectrum (DMSO- $d_6$ , 298 K) of streptomidine. Some extra cross-peaks (e.g. for C5) are predicted to relate to an isomerisation during the acquisition of spectra.

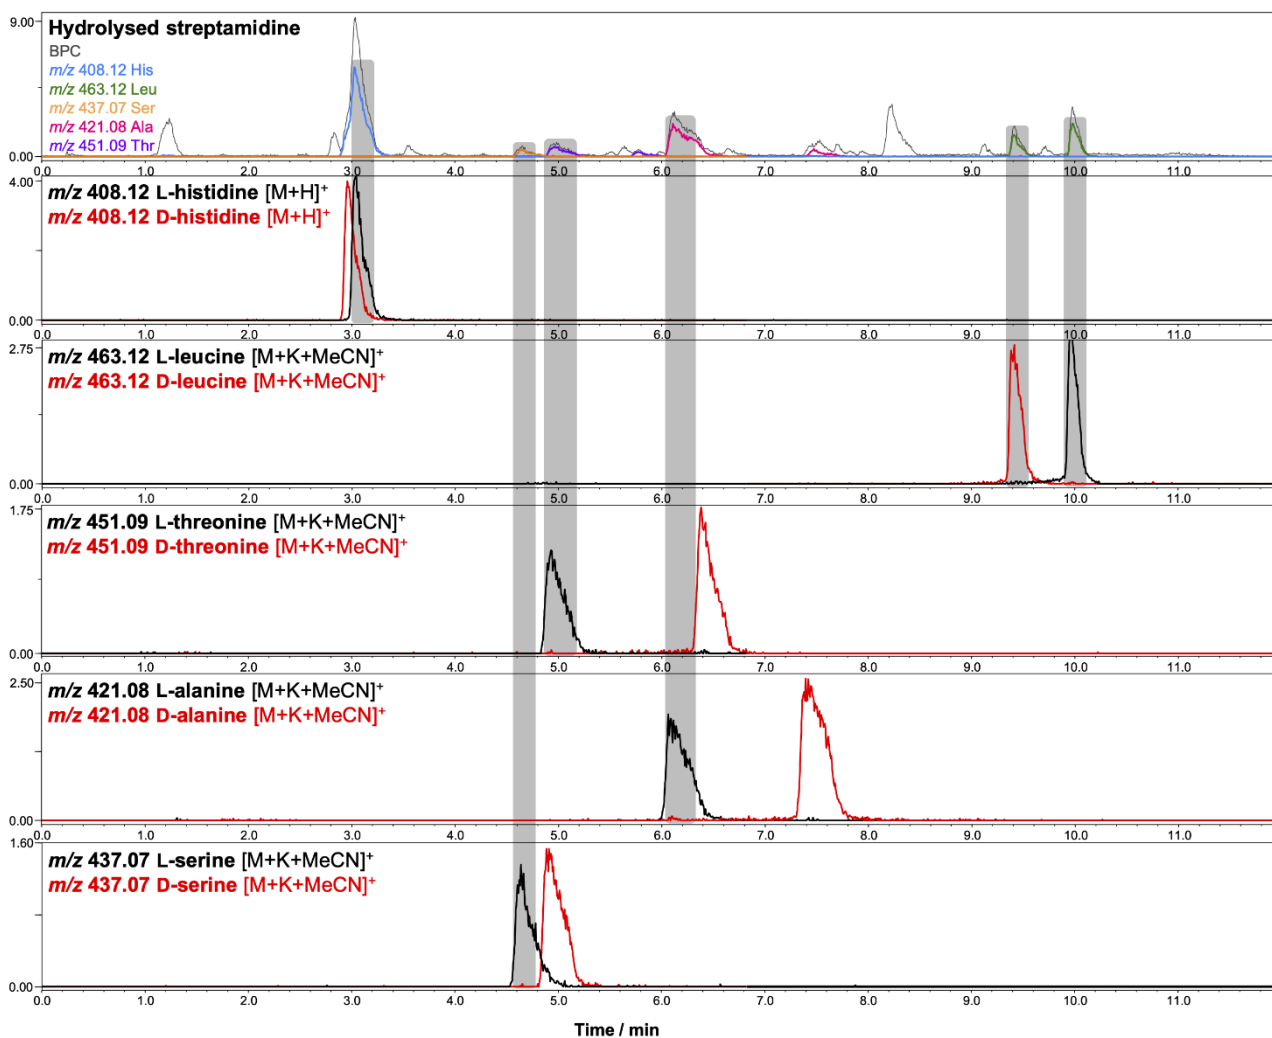

**Figure S21** LC-MS chromatograms following Marfey's analysis of streptamidine. The top panel shows the hydrolysed streptamidine sample where constituent amino acids have been derivatised with Marfey's reagent. Below this are the LC-MS chromatograms obtained from derivatisation of individual amino acid standards of L- and D- amino acids. With the exception of histidine, the unusual  $[M+K+MeCN]^+$  adducts were the dominant species detected in both the streptamidine sample and the amino acid standards.

Streptamidine <sup>1</sup>H NMR (immediately after purification)  
Streptamidine <sup>1</sup>H NMR (after long NMR experiments)

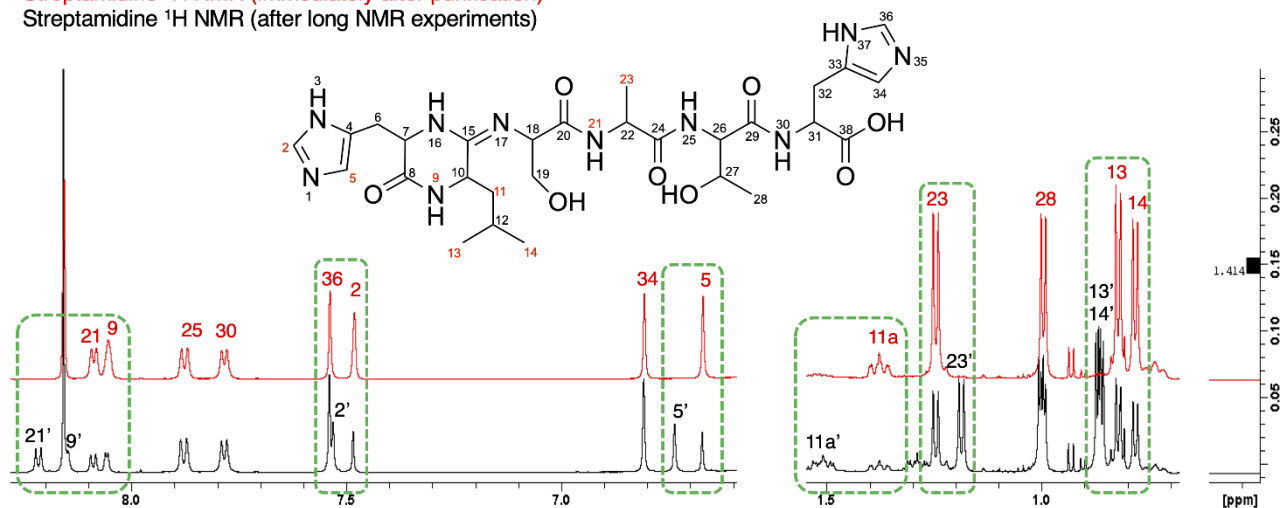

**Figure S22** Streptamidine isomerisation observed via NMR. The spectrum immediately after purification is shown as a red trace and the spectrum after long NMR experiments is shown in black. Protons shifts that significantly change are highlighted in red on the structure.



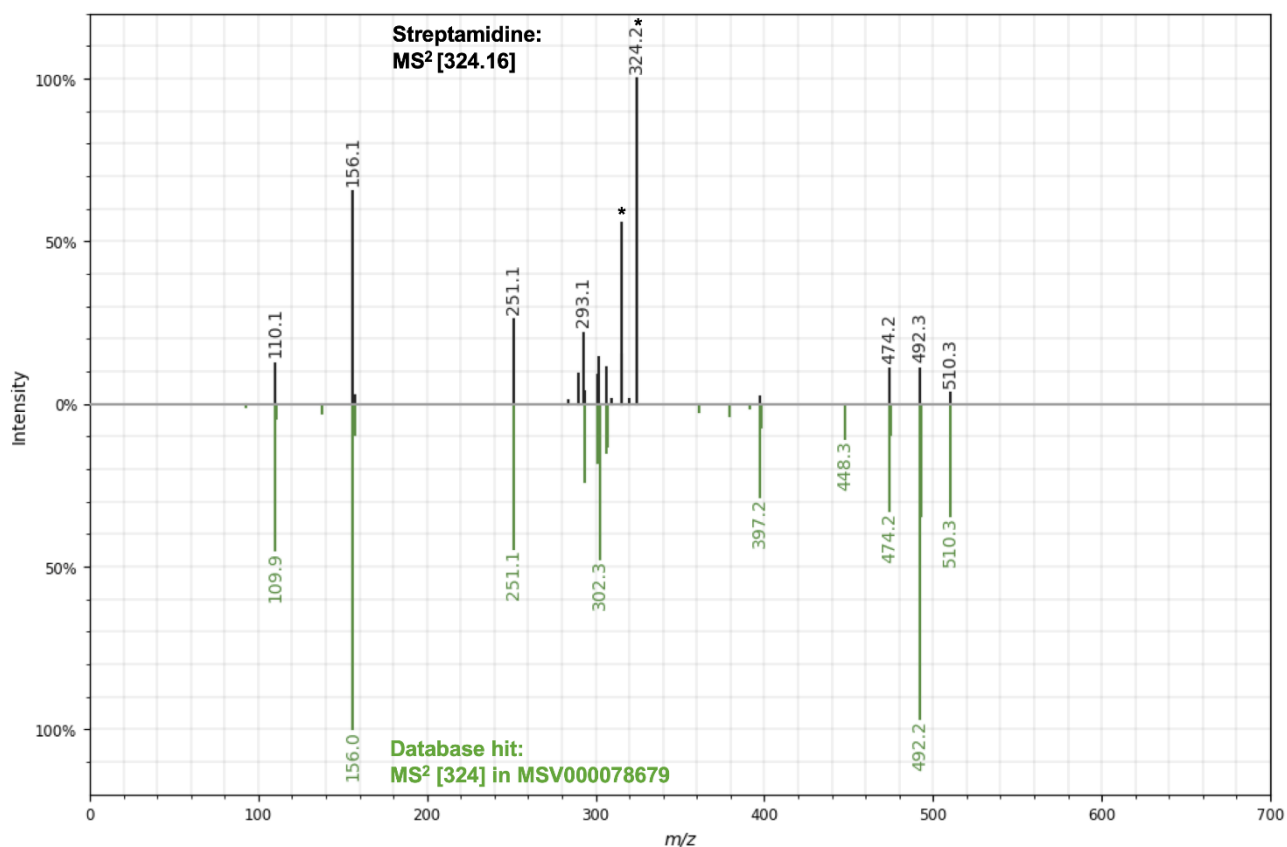

**Figure S23** Spectral match to the MS/MS spectrum of [streptomycin+2H]<sup>2+</sup> (*m/z* 324.16) identified using MASST (Mass Spectrometry Search Tool)<sup>23</sup> at GNPS (Global Natural Products Social Molecular Networking). The top spectrum (black) is from streptomycin and the mirror bottom spectrum (green) is the database hit. The hit is found in multiple samples of MassIVE Dataset MSV000078679 (“Zhang lab\_microbes library\_MS130001~9”), which is defined as an actinomycete dataset. Asterisks indicate non-matching peaks that feature a double charge: *m/z* 324.2 (unfragmented streptomycin) and *m/z* 315.2 (dehydrated streptomycin).

**Table S10** Indicator strains tested in bioactivity assays.

| Organism tested                       | Description                                                                         | Inhibition observed |
|---------------------------------------|-------------------------------------------------------------------------------------|---------------------|
| <i>E. coli</i> ATCC25922              | Gram-negative bacterium                                                             | None                |
| <i>E. coli</i> NR986                  | Gram-negative bacterium (mutant with increased membrane permeability) <sup>33</sup> | None                |
| <i>Pseudomonas aeruginosa</i> PA01    | Gram-negative bacterium                                                             | None                |
| <i>Pseudomonas fluorescens</i>        | Gram-negative bacterium                                                             | None                |
| <i>Bacillus subtilis</i> 168          | Gram-positive bacterium                                                             | None                |
| <i>Micrococcus luteus</i>             | Gram-positive bacterium                                                             | None                |
| <i>Mycobacterium smegmatis</i> MC2155 | Gram-positive bacterium                                                             | None                |
| <i>Streptomyces scabies</i>           | Gram-positive bacterium                                                             | None                |
| <i>Streptomyces cattleya</i>          | Gram-positive bacterium                                                             | None                |
| <i>Candida utilis</i>                 | Fungus                                                                              | None                |

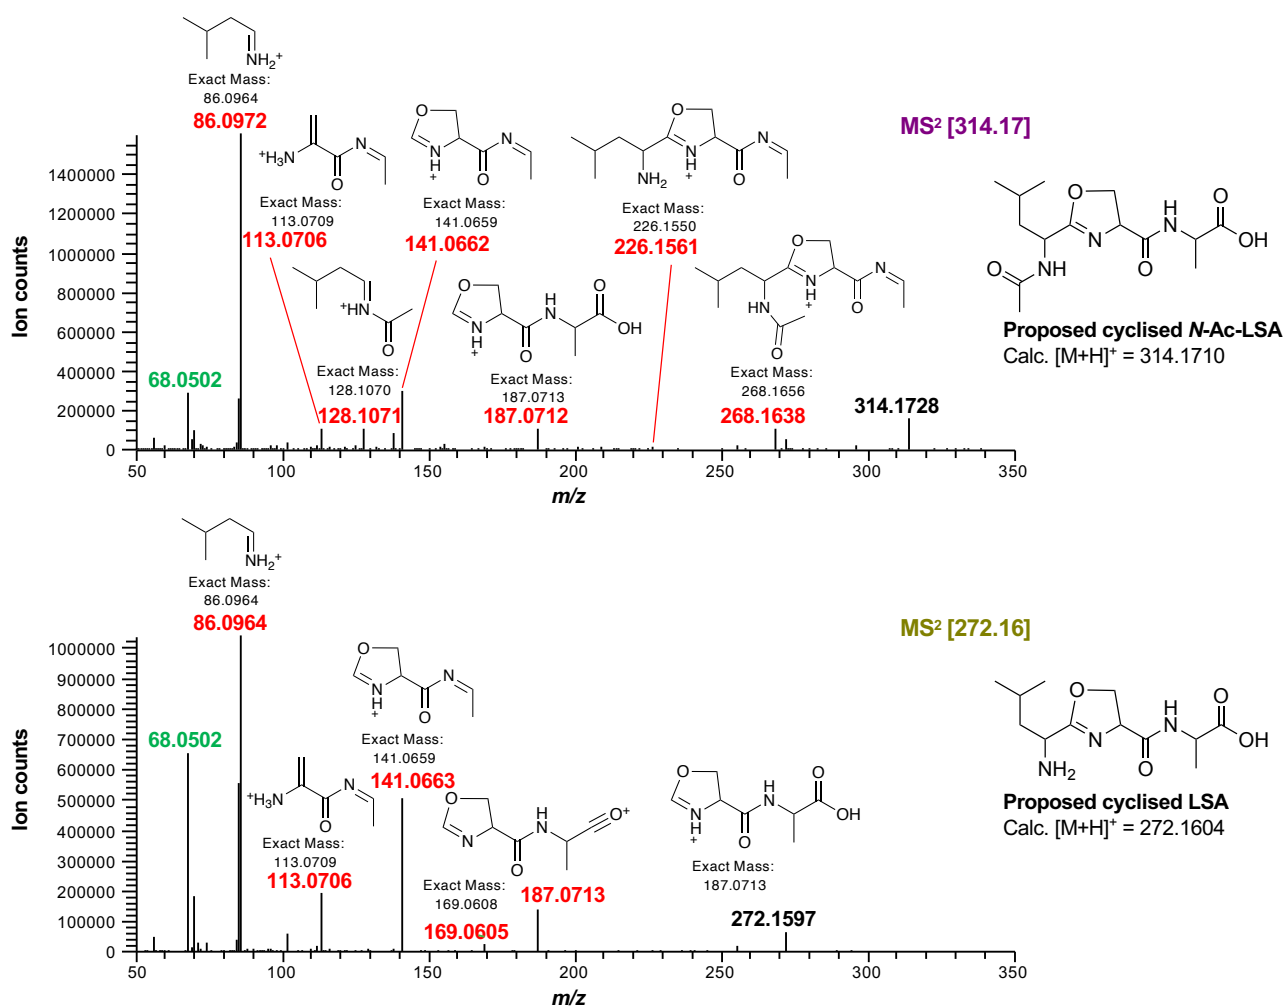

**Figure S24** MS/MS fragmentation data for predicted N-acetylated and cyclised LSA ( $m/z$  314.17, peptide A) and predicted cyclised LSA ( $m/z$  272.16, peptide B), obtained using a Thermo Q-Exactive.

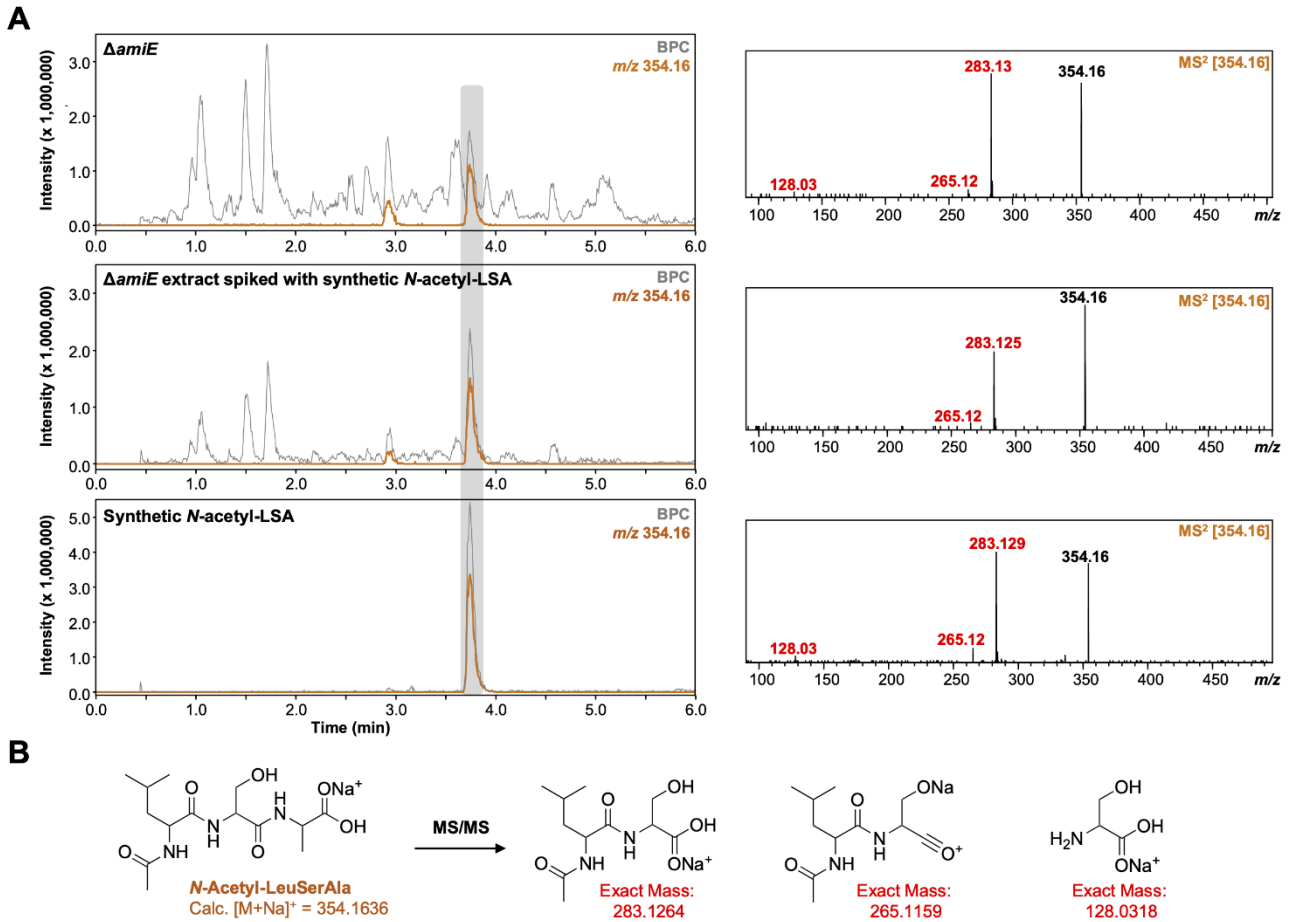

**Figure S25** Identity of  $m/z$  354.16 (peptide C). A. LC-MS analysis (Shimadzu IT-TOF) of *S. coelicolor* M1146-SalbC  $\Delta amiE$  culture extract versus a synthetic standard of *N*-acetylated LSA peptide (BPC = base peak chromatogram) and a mixed sample. Extracted ion chromatogram of  $m/z$  354.16 (orange) corresponds to the mass of the sodium adduct of *N*-acetylated LSA. MS/MS spectra are shown for  $m/z$  354.16 in the culture extract, the spiked sample, and the synthetic standard. B. Proposed MS/MS fragmentation for  $m/z$  354.16. Fragments 283.13 and 128.03 represent examples of non-canonical MS/MS fragmentation of sodiated peptides that results in the generation of carboxylated fragments instead of conventional b ions<sup>34,35</sup>.

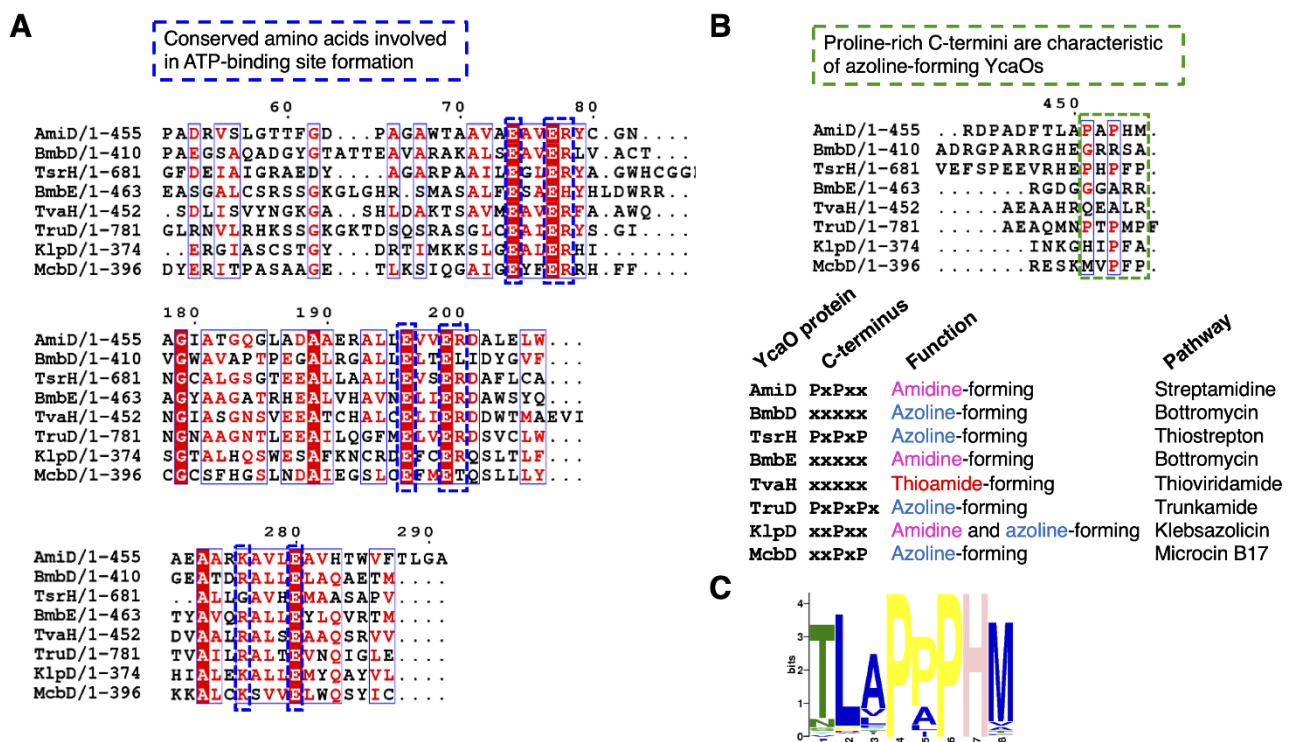

**Figure S26** Multiple sequence alignment of YcaO proteins. A. Conserved ATP-binding residues across diverse YcaO proteins involved in RiPP biosynthesis. Sequences aligned using MUSCLE<sup>5</sup> and visualised using Esprout<sup>36</sup>. B. Proline content of the C-termini of these proteins. C. MEME analysis<sup>14</sup> of the C-termini of all YcaO proteins associated with streptamidine-like (motif A) precursor peptides.

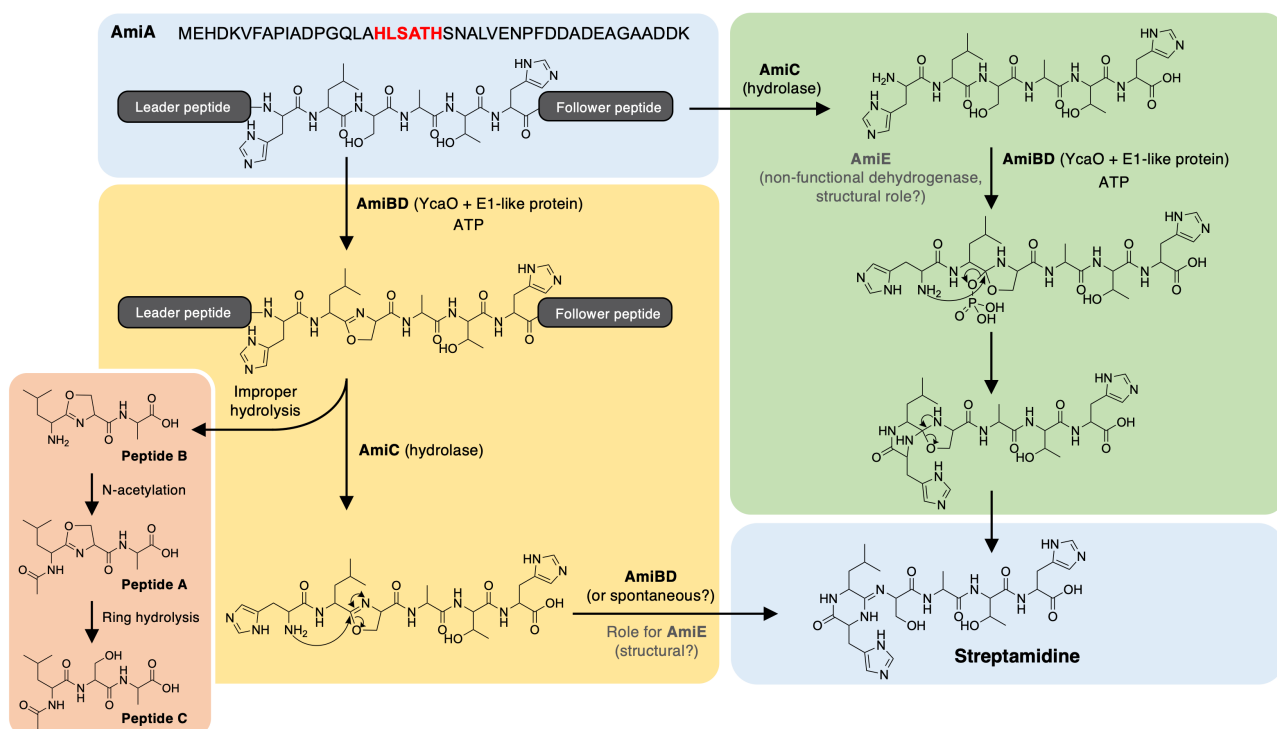

**Figure S27** Proposed mechanism of amidine ring formation in streptomycin based on predicted intermediates produced by dehydrogenase mutant. The yellow box represents a route that goes via a stable oxazoline intermediate prior to leader/follower peptide removal, where AmiE potentially has a structural role within an AmiBDE complex for proper amidine formation but is not needed for initial ATP-dependent oxazoline formation. The green box represents a route where the leader/follower peptide is removed first, thereby providing a free *N*-terminal amine for cyclisation via an *O*-phosphorylated hemiorthoamide. In the absence of AmiE, the final amidine forming step could potentially be disrupted. A possible shunt route to peptides A, B and C is proposed.

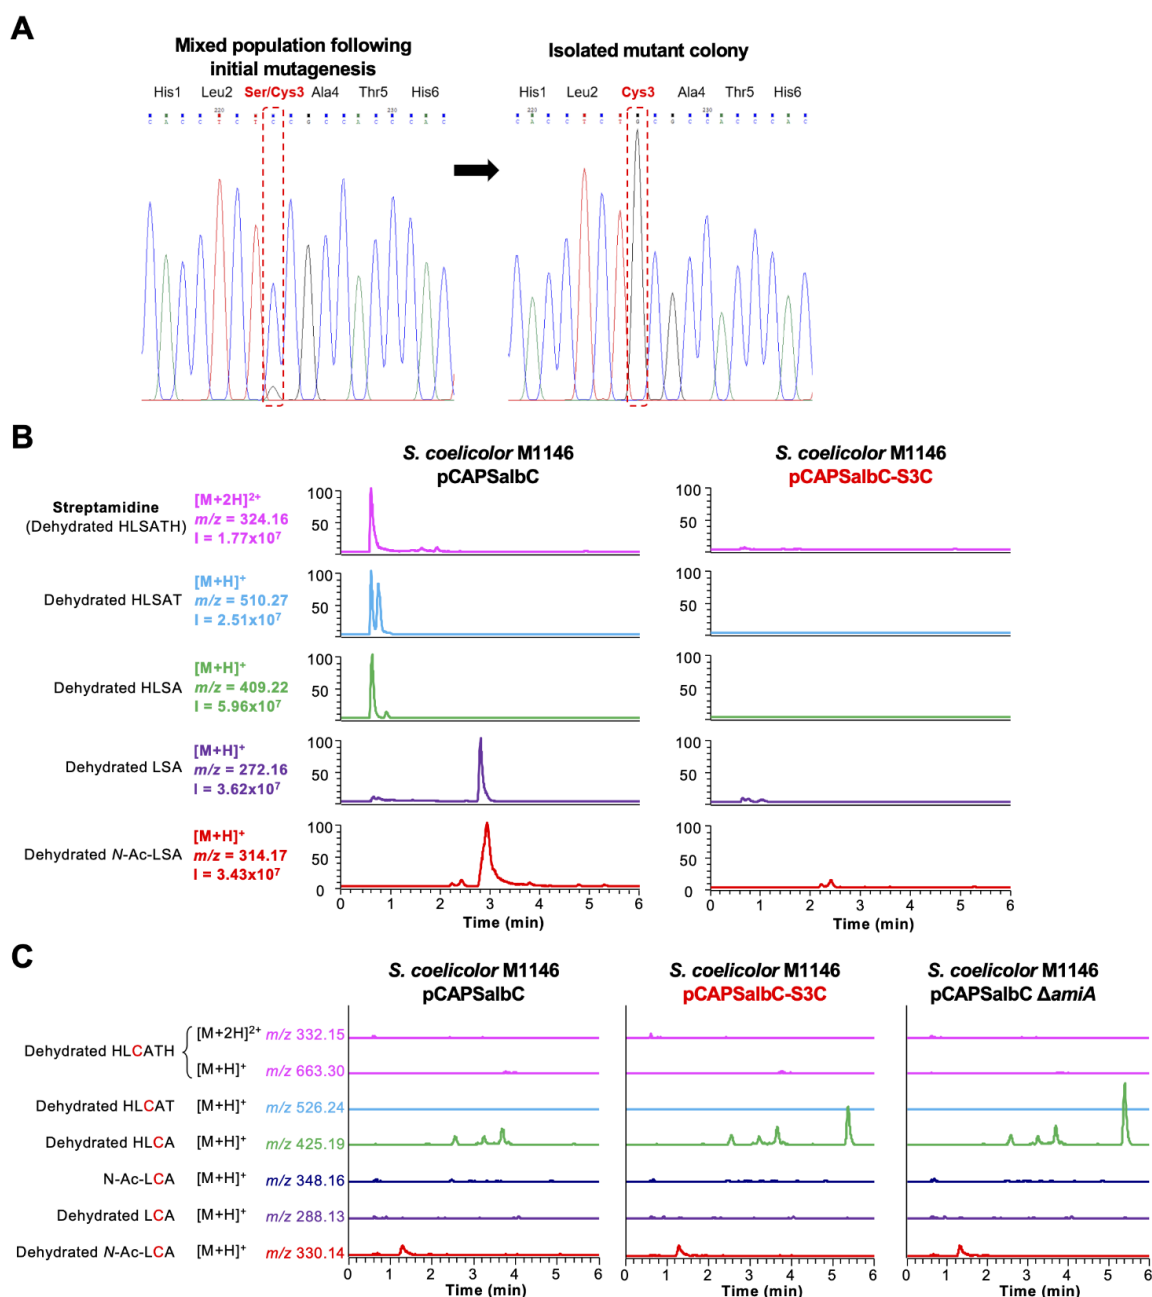

**Figure S28** Site-directed mutagenesis of *AmiA*. A. Sequence files obtained following PCR screening of colonies following mutagenesis of pCAPSalbC. A mixed plasmid population of “wild type” and mutant pCAPSalbC is shown following transformation of *E. coli* HME68-pCAPSalbC with mutant oligonucleotide. A clean pCAPSalbC-S3C mutant was obtained following transformation of the mixed plasmid population into *E. coli* DH5 $\alpha$  and PCR screening of single colonies. B. EICs for masses corresponding to streptomidine and other pathway shunt metabolites in culture extracts from *S. coelicolor* M1146 containing the wild-type *ami* BCG (pCAPSalbC) or the *AmiA*-S3C mutant version (pCAPSalbC-S3C). Chromatograms in each row are normalised to the intensity (*I*) indicated to their left. C. EICs for predicted masses corresponding to cysteine-containing versions of pathway metabolites in culture extracts from *S. coelicolor* M1146 containing the wild-type *ami* BCG (pCAPSalbC), the S3C mutant (pCAPSalbC-S3C) and the  $\Delta$ *amiA* mutant (pCAPSalbC  $\Delta$ *amiA*). All spectra obtained on a Thermo Q-Exactive.





## REFERENCES

- 1 V. Noskov, N. Kouprina, S.-H. Leem, M. Koriabine, J. C. Barrett and V. Larionov, *Nucleic Acids Res.*, 2002, **30**, E8.
- 2 B. Gust, G. L. Challis, K. Fowler, T. Kieser and K. F. Chater, *Proc. Natl. Acad. Sci. U.S.A.*, 2003, **100**, 1541–1546.
- 3 L. Y. Geer, M. Domrachev, D. J. Lipman and S. H. Bryant, *Genome Res.*, 2002, **12**, 1619–1623.
- 4 R. Zallot, N. Oberg and J. A. Gerlt, *Biochemistry*, 2019, **58**, 4169–4182.
- 5 R. C. Edgar, *Nucleic Acids Res.*, 2004, **32**, 1792–1797.
- 6 A. Stamatakis, *Bioinformatics*, 2014, **30**, 1312–1313.
- 7 I. Letunic and P. Bork, *Nucleic Acids Res.*, 2016, **44**, W242–W245.
- 8 J. Santos-Aberturas, G. Chandra, L. Frattaruolo, R. Lacret, T. H. Pham, N. M. Vior, T. H. Eyles and A. W. Truman, *Nucleic Acids Res.*, 2019, **47**, 4624–4637.
- 9 A. D. Moffat, J. Santos-Aberturas, G. Chandra and A. W. Truman, *Methods Mol. Biol.*, 2021, **2296**, 227–247.
- 10 S. Halary, J. O. McInerney, P. Lopez and E. Bapteste, *BMC Evol. Biol.*, 2013, **13**, 146.
- 11 P. Shannon, A. Markiel, O. Ozier, N. S. Baliga, J. T. Wang, D. Ramage, N. Amin, B. Schwikowski and T. Ideker, *Genome Res.*, 2003, **13**, 2498–2504.
- 12 J. D. Thompson, D. G. Higgins and T. J. Gibson, *Nucleic Acids Res.*, 1994, **22**, 4673–4680.
- 13 S. Kumar, G. Stecher and K. Tamura, *Mol. Biol. Evol.*, 2016, **33**, 1870–1874.
- 14 T. L. Bailey, M. Boden, F. A. Buske, M. Frith, C. E. Grant, L. Clementi, J. Ren, W. W. Li and W. S. Noble, *Nucleic Acids Res.*, 2009, **37**, W202–W208.
- 15 T. Carver, S. R. Harris, M. Berriman, J. Parkhill and J. A. McQuillan, *Bioinformatics*, 2012, **28**, 464–469.
- 16 G. Lu and E. N. Moriyama, *Brief Bioinform.*, 2004, **5**, 378–388.
- 17 M. H. Medema, E. Takano and R. Breitling, *Mol. Biol. Evol.*, 2013, **30**, 1218–1223.
- 18 L. A. Kelley, S. Mezulis, C. M. Yates, M. N. Wass and M. J. E. Sternberg, *Nat. Protoc.*, 2015, **10**, 845–858.
- 19 E. L. C. de Los Santos, *Sci. Rep.*, 2019, **9**, 13406.
- 20 X. Tang, J. Li, N. Millán-Aguiñaga, J. J. Zhang, E. C. O'Neill, J. A. Ugalde, P. R. Jensen, S. M. Mantovani and B. S. Moore, *ACS Chem. Biol.*, 2015, **10**, 2841–2849.
- 21 S. A. Kautsar, K. Blin, S. Shaw, J. C. Navarro-Muñoz, B. R. Terlouw, J. J. J. van der Hooft, J. A. van Santen, V. Tracanna, H. G. Suarez Duran, V. Pascal Andreu, N. Selem-Mojica, M. Alanjary, S. L. Robinson, G. Lund, S. C. Epstein, A. C. Sisto, L. K. Charkoudian, J. Collemare, R. G. Lington, T. Weber and M. H. Medema, *Nucleic Acids Res.*, 2020, **48**, D454–D458.
- 22 N. Costantino and D. L. Court, *Proc. Natl. Acad. Sci. U.S.A.*, 2003, **100**, 15748–15753.

- 23 M. Wang, A. K. Jarmusch, F. Vargas, A. A. Aksenov, J. M. Gauglitz, K. Weldon, D. Petras, R. da Silva, R. Quinn, A. V. Melnik, J. J. J. van der Hooff, A. M. Caraballo-Rodríguez, L.-F. Nothias, C. M. Aceves, M. Panitchpakdi, E. Brown, F. Di Ottavio, N. Sikora, E. O. Elijah, L. Labarta-Bajo, E. C. Gentry, S. Shalapur, K. E. Kyle, S. P. Puckett, J. D. Watrous, C. S. Carpenter, A. Bouslimani, M. Ernst, A. D. Swafford, E. I. Zuniga, M. J. Balunas, J. L. Klassen, R. Loomba, R. Knight, N. Bandeira and P. C. Dorrestein, *Nat. Biotechnol.*, 2020, **38**, 23–26.
- 24 D. B. Alexander and D. A. Zuberer, *Biol. Fert Soils*, 1991, **12**, 39–45.
- 25 G. Müller and K. N. Raymond, *J. Bacteriol.*, 1984, **160**, 304–312.
- 26 K. F. Chater and L. C. Wilde, *J. Gen. Microbiol.*, 1980, **116**, 323–334.
- 27 J. P. Gomez-Escribano and M. J. Bibb, *Microb. Biotechnol.*, 2011, **4**, 207–215.
- 28 M. Bierman, R. Logan, K. O'Brien, E. T. Seno, R. N. Rao and B. E. Schoner, *Gene*, 1992, **116**, 43–49.
- 29 H.-J. Hong, M. I. Hutchings, L. M. Hill and M. J. Buttner, *J. Biol. Chem.*, 2005, **280**, 13055–13061.
- 30 A. M. Waterhouse, J. B. Procter, D. M. A. Martin, M. Clamp and G. J. Barton, *Bioinformatics*, 2009, **25**, 1189–1191.
- 31 W. R. Taylor, *Protein Eng.*, 1997, **10**, 743–746.
- 32 V. Prabhu, B. Chatson, G. Abrams and J. King, *J. Plant Physiol.*, 1996, **149**, 246–250.
- 33 J. E. Button, T. J. Silhavy and N. Ruiz, *J. Bacteriol.*, 2007, **189**, 1523–1530.
- 34 R. P. Grese, R. L. Cerny and M. L. Gross, *J. Am. Chem. Soc.*, 1989, **111**, 2835–2842.
- 35 K. A. Newton and S. A. McLuckey, *J. Am. Soc. Mass Spectrom.*, 2004, **15**, 607–615.
- 36 X. Robert and P. Gouet, *Nucleic Acids Res.*, 2014, **42**, W320–W324.
- 37 D. Ghilarov, C. E. M. Stevenson, D. Y. Travin, J. Piskunova, M. Serebryakova, A. Maxwell, D. M. Lawson and K. Severinov, *Mol. Cell*, 2019, **73**, 749-762.e5.
- 38 J. O. Melby, X. Li and D. A. Mitchell, *Biochemistry*, 2014, **53**, 413–422.
