# Supplementary material for: Discovery and characterisation of an amidine-containing ribosomally-synthesised peptide that is widely distributed in nature
Source: Royal Society of Chemistry journal article supplement (doi:10.1039/d1sc01456k), 2021-01-01
Supplement: d1sc01456k2.cys [file d1sc01456k2.cys]

Archive with 32 entries (32 files):
- CytoscapeSession-2019_12_19-13_30/3.0.0.version
- CytoscapeSession-2019_12_19-13_30/networks/36-cc_1.to.494.txt.xgmml
- CytoscapeSession-2019_12_19-13_30/views/52-29794-cc_1.to.494.txt.xgmml
- CytoscapeSession-2019_12_19-13_30/tables/52-cc_1.to.494.txt/LOCAL_ATTRS-org.cytoscape.model.CyNetwork-cc_1.to.494.txt+default+network.cytable
- CytoscapeSession-2019_12_19-13_30/tables/36-cc_1.to.494.txt/SHARED_ATTRS-org.cytoscape.model.CyNode-36+shared+node.cytable
- CytoscapeSession-2019_12_19-13_30/tables/36-cc_1.to.494.txt/HIDDEN-org.cytoscape.model.CyNode-36+hidden+node.cytable
- CytoscapeSession-2019_12_19-13_30/tables/52-cc_1.to.494.txt/LOCAL_ATTRS-org.cytoscape.model.CyNode-cc_1.to.494.txt+default+node.cytable
- CytoscapeSession-2019_12_19-13_30/tables/36-cc_1.to.494.txt/HIDDEN-org.cytoscape.model.CyEdge-36+hidden+edge.cytable
- CytoscapeSession-2019_12_19-13_30/tables/36-cc_1.to.494.txt/LOCAL_ATTRS-org.cytoscape.model.CyNetwork-36+default+network.cytable
- CytoscapeSession-2019_12_19-13_30/tables/52-cc_1.to.494.txt/HIDDEN-org.cytoscape.model.CyNetwork-52+hidden+network.cytable
- CytoscapeSession-2019_12_19-13_30/tables/36-cc_1.to.494.txt/SHARED_ATTRS-org.cytoscape.model.CyNetwork-36+shared+network.cytable
- CytoscapeSession-2019_12_19-13_30/tables/36-cc_1.to.494.txt/LOCAL_ATTRS-org.cytoscape.model.CyEdge-36+default+edge.cytable
- CytoscapeSession-2019_12_19-13_30/tables/52-cc_1.to.494.txt/LOCAL_ATTRS-org.cytoscape.model.CyEdge-cc_1.to.494.txt+default+edge.cytable
- CytoscapeSession-2019_12_19-13_30/tables/36-cc_1.to.494.txt/SHARED_ATTRS-org.cytoscape.model.CyEdge-36+shared+edge.cytable
- CytoscapeSession-2019_12_19-13_30/tables/36-cc_1.to.494.txt/LOCAL_ATTRS-org.cytoscape.model.CyNode-36+default+node.cytable
- CytoscapeSession-2019_12_19-13_30/tables/52-cc_1.to.494.txt/HIDDEN-org.cytoscape.model.CyNode-52+hidden+node.cytable
- CytoscapeSession-2019_12_19-13_30/tables/52-cc_1.to.494.txt/HIDDEN-org.cytoscape.model.CyEdge-52+hidden+edge.cytable
- CytoscapeSession-2019_12_19-13_30/tables/36-cc_1.to.494.txt/HIDDEN-org.cytoscape.model.CyNetwork-36+hidden+network.cytable
- CytoscapeSession-2019_12_19-13_30/tables/cytables.xml
- CytoscapeSession-2019_12_19-13_30/session_vizmap.xml
- CytoscapeSession-2019_12_19-13_30/properties/groupSettings.props
- CytoscapeSession-2019_12_19-13_30/properties/session_bookmarks.xml
- CytoscapeSession-2019_12_19-13_30/properties/session.props
- CytoscapeSession-2019_12_19-13_30/apps/org.cytoscape.ding.customgraphicsmgr/image_metadata.props
- CytoscapeSession-2019_12_19-13_30/apps/org.cytoscape.swing-application/session_state.xml
- CytoscapeSession-2019_12_19-13_30/apps/org.cytoscape.swing-application/network_list.xml
- CytoscapeSession-2019_12_19-13_30/apps/org.cytoscape.filter/filters.json
- CytoscapeSession-2019_12_19-13_30/apps/org.cytoscape.filter/filterChains.json
- CytoscapeSession-2019_12_19-13_30/apps/org.cytoscape.browser/UnassignedTables.props
- CytoscapeSession-2019_12_19-13_30/apps/org.cytoscape.browser/NodeTable.props
- CytoscapeSession-2019_12_19-13_30/apps/org.cytoscape.browser/EdgeTable.props
- CytoscapeSession-2019_12_19-13_30/apps/org.cytoscape.browser/NetworkTable.props
