# Supplementary material for: Discovery and characterisation of an amidine-containing ribosomally-synthesised peptide that is widely distributed in nature
Source: Royal Society of Chemistry journal article supplement (doi:10.1039/d1sc01456k), 2021-01-01
Supplement: d1sc01456k2.cys [file d1sc01456k2.cys › CytoscapeSession-2019_12_19-13_30/apps/org.cytoscape.browser/NetworkTable.props]

cc_1.to.494.txt default network	0	SUID	false
cc_1.to.494.txt default network	1	selected	false
cc_1.to.494.txt default network	2	shared name	true
cc_1.to.494.txt default network	3	name	true
cc_1.to.494.txt default network	4	networkMetadata	true
cc_1.to.494.txt default network	5	__Annotations	true
