# Supplementary material for: Discovery and characterisation of an amidine-containing ribosomally-synthesised peptide that is widely distributed in nature
Source: Royal Society of Chemistry journal article supplement (doi:10.1039/d1sc01456k), 2021-01-01
Supplement: d1sc01456k2.cys [file d1sc01456k2.cys › CytoscapeSession-2019_12_19-13_30/apps/org.cytoscape.browser/NodeTable.props]

cc_1.to.494.txt default node	0	SUID	false
cc_1.to.494.txt default node	1	selected	false
cc_1.to.494.txt default node	2	shared name	true
cc_1.to.494.txt default node	3	name	true
cc_1.to.494.txt default node	4	Accession	true
cc_1.to.494.txt default node	5	Genus	true
cc_1.to.494.txt default node	6	ID	true
cc_1.to.494.txt default node	7	Organism	true
cc_1.to.494.txt default node	8	PPSerial	true
cc_1.to.494.txt default node	9	PP_TE_Distance	true
cc_1.to.494.txt default node	10	Prodigalscore	true
cc_1.to.494.txt default node	11	SameStrand	true
cc_1.to.494.txt default node	12	Sequence	true
cc_1.to.494.txt default node	13	canonicalName	true
cc_1.to.494.txt default node	14	cytoscape.alias.list	true
cc_1.to.494.txt default node	15	hdesc	true
cc_1.to.494.txt default node	16	hname	true
cc_1.to.494.txt default node	17	signif	true
