# Supplementary material for: Discovery and characterisation of an amidine-containing ribosomally-synthesised peptide that is widely distributed in nature
Source: Royal Society of Chemistry journal article supplement (doi:10.1039/d1sc01456k), 2021-01-01
Supplement: d1sc01456k2.cys [file d1sc01456k2.cys › CytoscapeSession-2019_12_19-13_30/networks/36-cc_1.to.494.txt.xgmml]

<?xml version="1.0" encoding="UTF-8" standalone="yes"?>
<graph id="36" label="cc_1.to.494.txt" cy:view="0" cy:registered="0" cy:documentVersion="3.0" xmlns:dc="http://purl.org/dc/elements/1.1/" xmlns:xlink="http://www.w3.org/1999/xlink" xmlns:rdf="http://www.w3.org/1999/02/22-rdf-syntax-ns#" xmlns:cy="http://www.cytoscape.org" xmlns="http://www.cs.rpi.edu/XGMML">
  <att>
    <graph id="52" label="cc_1.to.494.txt" cy:registered="1">
      <node id="2553" label="WP_040271779_1"/>
      <node id="2552" label="ONI75210_2"/>
      <node id="2551" label="WP_086780456_1"/>
      <node id="2550" label="WP_055876321_1"/>
      <node id="2549" label="WP_125937921_2"/>
      <node id="2548" label="WP_081761968_1"/>
      <node id="2547" label="WP_096287923_1"/>
      <node id="2546" label="WP_090858762_1"/>
      <node id="2545" label="WP_115920406_2"/>
      <node id="2544" label="ALG08515_1"/>
      <node id="2543" label="WP_121830363_1"/>
      <node id="2542" label="WP_107004474_1"/>
      <node id="2541" label="WP_081907113_1"/>
      <node id="2540" label="WP_073876556_1"/>
      <node id="2539" label="WP_053623192_1"/>
      <node id="2538" label="RPK87717_1"/>
      <node id="2537" label="WP_116951408_3"/>
      <node id="2536" label="WP_129802804_1"/>
      <node id="2535" label="EHM27670_1"/>
      <node id="2534" label="WP_089118023_1"/>
      <node id="2533" label="WP_067284698_3"/>
      <node id="2532" label="WP_027743449_4"/>
      <node id="2531" label="WP_017627596_1"/>
      <node id="2530" label="WP_110343524_1"/>
      <node id="2529" label="WP_130451801_3"/>
      <node id="2528" label="WP_084752844_1"/>
      <node id="2527" label="WP_006350677_1"/>
      <node id="2526" label="WP_094931980_2"/>
      <node id="2525" label="WP_083467034_1"/>
      <node id="2524" label="WP_105672644_2"/>
      <node id="2523" label="WP_017594221_1"/>
      <node id="2522" label="WP_015613007_1"/>
      <node id="2521" label="WP_045196822_2"/>
      <node id="2520" label="WP_038682890_3"/>
      <node id="2519" label="WP_073770697_1"/>
      <node id="2518" label="WP_089597075_1"/>
      <node id="2517" label="WP_110470681_1"/>
      <node id="2516" label="WP_037939130_1"/>
      <node id="2515" label="WP_061787600_2"/>
      <node id="2514" label="WP_017558654_2"/>
      <node id="2513" label="WP_064722319_1"/>
      <node id="2512" label="WP_055421506_1"/>
      <node id="2511" label="WP_114400345_1"/>
      <node id="2510" label="WP_093766414_4"/>
      <node id="2509" label="WP_078760898_1"/>
      <node id="2508" label="WP_073815370_1"/>
      <node id="2507" label="WP_053556805_1"/>
      <node id="2506" label="WP_103530696_1"/>
      <node id="2505" label="WP_093355673_1"/>
      <node id="2504" label="OKI12399_1"/>
      <node id="2503" label="WP_071934999_2"/>
      <node id="2502" label="WP_087767686_1"/>
      <node id="2501" label="OQO95173_1"/>
      <node id="2500" label="WP_029987712_1"/>
      <node id="2499" label="WP_018847808_1"/>
      <node id="2498" label="KWX01007_1"/>
      <node id="2497" label="WP_075846085_2"/>
      <node id="2496" label="WP_123813761_1"/>
      <node id="2495" label="OLO29347_1"/>
      <node id="2494" label="OKJ27000_1"/>
      <node id="2493" label="WP_113689373_1"/>
      <node id="2492" label="WP_095752644_1"/>
      <node id="2491" label="RLV71217_1"/>
      <node id="2490" label="WP_097634704_1"/>
      <node id="2489" label="PXY18584_1"/>
      <node id="2488" label="WP_083753877_2"/>
      <node id="2487" label="WP_109162285_1"/>
      <node id="2486" label="KKI16967_3"/>
      <node id="2485" label="WP_084252732_3"/>
      <node id="2484" label="SJZ81173_1"/>
      <node id="2483" label="WP_103467468_1"/>
      <node id="2482" label="WP_033300563_1"/>
      <node id="2481" label="WP_058632033_1"/>
      <node id="2480" label="WP_078612341_1"/>
      <node id="2479" label="WP_059008183_2"/>
      <node id="2478" label="WP_008409979_1"/>
      <node id="2477" label="WP_116112318_1"/>
      <node id="2476" label="WP_031002210_2"/>
      <node id="2475" label="ALC19908_1"/>
      <node id="2474" label="WP_015100718_1"/>
      <node id="2473" label="WP_006501818_1"/>
      <node id="2472" label="WP_055689909_1"/>
      <node id="2471" label="WP_121007506_1"/>
      <node id="2470" label="WP_058915320_1"/>
      <node id="2469" label="WP_105722094_1"/>
      <node id="2468" label="WP_109186559_1"/>
      <node id="2467" label="SED75494_1"/>
      <node id="2466" label="WP_111250567_1"/>
      <node id="2465" label="WP_030143818_1"/>
      <node id="2464" label="WP_062924764_1"/>
      <node id="2463" label="WP_093655900_5"/>
      <node id="2462" label="WP_105527259_1"/>
      <node id="2461" label="WP_048574296_1"/>
      <node id="2460" label="WP_052852666_2"/>
      <node id="2459" label="WP_066976558_1"/>
      <node id="2458" label="WP_042167067_1"/>
      <node id="2457" label="WP_081663146_1"/>
      <node id="2456" label="WP_132929859_1"/>
      <node id="2455" label="WP_043461231_1"/>
      <node id="2454" label="WP_077689962_1"/>
      <node id="2453" label="WP_028327189_1"/>
      <node id="2452" label="WP_016691947_2"/>
      <node id="2451" label="WP_070343622_1"/>
      <node id="2450" label="OKI46856_1"/>
      <node id="2449" label="WP_125509413_1"/>
      <node id="2448" label="CEL19833_1"/>
      <node id="2447" label="WP_010048307_1"/>
      <node id="2446" label="WP_030701973_1"/>
      <node id="2445" label="WP_033318793_2"/>
      <node id="2444" label="WP_083472659_1"/>
      <node id="2443" label="WP_112271410_1"/>
      <node id="2442" label="KQR86552_1"/>
      <node id="2441" label="WP_130474520_1"/>
      <node id="2440" label="WP_043591397_1"/>
      <node id="2439" label="WP_107120384_1"/>
      <node id="2438" label="OQJ63784_1"/>
      <node id="2437" label="WP_076824657_1"/>
      <node id="2436" label="WP_080909324_2"/>
      <node id="2435" label="WP_055938416_1"/>
      <node id="2434" label="OUE27579_1"/>
      <node id="2433" label="WP_131626375_1"/>
      <node id="2432" label="RPE52214_1"/>
      <node id="2431" label="WP_134789214_1"/>
      <node id="2430" label="WP_079054543_1"/>
      <node id="2429" label="WP_067823333_1"/>
      <node id="2428" label="WP_085014622_6"/>
      <node id="2427" label="WP_086513413_1"/>
      <node id="2426" label="WP_104343125_1"/>
      <node id="2425" label="WP_082509526_1"/>
      <node id="2424" label="WP_124566915_2"/>
      <node id="2423" label="WP_048316860_1"/>
      <node id="2422" label="WP_086513414_1"/>
      <node id="2421" label="WP_045877303_1"/>
      <node id="2420" label="WP_080754833_1"/>
      <node id="2419" label="WP_084011357_1"/>
      <node id="2418" label="WP_081557171_1"/>
      <node id="2417" label="GCB53695_1"/>
      <node id="2416" label="WP_084523472_1"/>
      <node id="2415" label="WP_091272827_1"/>
      <node id="2414" label="WP_076843253_1"/>
      <node id="2413" label="OUE18681_1"/>
      <node id="2412" label="WP_104290301_1"/>
      <node id="2411" label="WP_086516540_1"/>
      <node id="2410" label="WP_080909325_1"/>
      <node id="2409" label="EME16460_1"/>
      <node id="2408" label="WP_124003201_1"/>
      <node id="2407" label="WP_124003633_1"/>
      <node id="2406" label="WP_086516539_1"/>
      <node id="2405" label="WP_052129072_1"/>
      <node id="2404" label="KUN25245_1"/>
      <node id="2403" label="WP_007536321_1"/>
      <node id="2402" label="WP_131626374_1"/>
      <node id="2401" label="WP_124566916_1"/>
      <node id="2400" label="WP_086522342_1"/>
      <node id="2399" label="WP_104343124_1"/>
      <node id="2398" label="WP_094130179_1"/>
      <node id="2397" label="WP_076843254_1"/>
      <node id="2396" label="CAQ01680_1"/>
      <node id="2395" label="WP_048317341_1"/>
      <node id="2394" label="OUE27580_1"/>
      <node id="2393" label="SMQ71228_1"/>
      <node id="2392" label="WP_075831737_2"/>
      <node id="2391" label="WP_086474257_1"/>
      <node id="2390" label="WP_098957465_1"/>
      <node id="2389" label="WP_089245620_1"/>
      <node id="2388" label="WP_086461443_1"/>
      <node id="2387" label="WP_116055407_1"/>
      <node id="2386" label="WP_098957614_1"/>
      <node id="2385" label="REE48079_1"/>
      <node id="2384" label="WP_130474521_1"/>
      <node id="2383" label="ALE78105_1"/>
      <node id="2382" label="ETD31629_2"/>
      <node id="2381" label="PXY26195_1"/>
      <node id="2380" label="WP_073939680_1"/>
      <node id="2379" label="WP_084990460_1"/>
      <node id="2378" label="WP_030081850_1"/>
      <node id="2377" label="PYE15898_1"/>
      <node id="2376" label="WP_083609312_1"/>
      <node id="2375" label="WP_043497828_1"/>
      <node id="2374" label="WP_030546164_1"/>
      <node id="2373" label="WP_031131024_1"/>
      <node id="2372" label="WP_050723163_1"/>
      <node id="2371" label="WP_030584801_1"/>
      <node id="2370" label="WP_083193763_1"/>
      <node id="2369" label="KZE98020_2"/>
      <node id="2368" label="WP_056298480_2"/>
      <node id="2367" label="WP_049566251_2"/>
      <node id="2366" label="WP_100387934_1"/>
      <node id="2365" label="WP_058614992_2"/>
      <node id="2364" label="WP_071042996_4"/>
      <node id="2363" label="WP_129171932_1"/>
      <node id="2362" label="WP_122819575_1"/>
      <node id="2361" label="WP_126382826_2"/>
      <node id="2360" label="KTS91804_1"/>
      <node id="2359" label="WP_005962416_1"/>
      <node id="2358" label="WP_051268721_1"/>
      <node id="2357" label="WP_129171933_1"/>
      <node id="2356" label="WP_126382827_3"/>
      <node id="2355" label="WP_100387935_1"/>
      <node id="2354" label="WP_066216109_2"/>
      <node id="2353" label="WP_106248383_1"/>
      <node id="2352" label="WP_059193363_1"/>
      <node id="2351" label="WP_108913844_1"/>
      <node id="2350" label="OQJ49465_1"/>
      <node id="2349" label="WP_060938723_1"/>
      <node id="2348" label="OUE26862_1"/>
      <node id="2347" label="WP_091272829_1"/>
      <node id="2346" label="WP_131785730_3"/>
      <node id="2345" label="WP_076804070_1"/>
      <node id="2344" label="WP_021198358_1"/>
      <node id="2343" label="WP_101257249_1"/>
      <node id="2342" label="WP_067478932_1"/>
      <node id="2341" label="WP_031075178_1"/>
      <node id="2340" label="WP_083926711_1"/>
      <node id="2339" label="WP_084479774_1"/>
      <node id="2338" label="SNB77017_1"/>
      <node id="2337" label="ALM43314_1"/>
      <node id="2336" label="WP_020679164_1"/>
      <node id="2335" label="WP_078883251_1"/>
      <node id="2334" label="WP_023590616_1"/>
      <node id="2333" label="WP_073795746_1"/>
      <node id="2332" label="WP_010839852_1"/>
      <node id="2331" label="WP_004004118_3"/>
      <node id="2330" label="WP_134028286_1"/>
      <node id="2329" label="KQX30631_1"/>
      <node id="2328" label="WP_017947324_1"/>
      <node id="2327" label="WP_043809367_1"/>
      <node id="2326" label="WP_086461444_1"/>
      <node id="2325" label="WP_119425883_1"/>
      <node id="2324" label="ODV02566_1"/>
      <node id="2323" label="WP_068920624_1"/>
      <node id="2322" label="WP_124799873_3"/>
      <node id="2321" label="GAY09001_1"/>
      <node id="2320" label="WP_004017479_1"/>
      <node id="2319" label="EEZ91469_4"/>
      <node id="2318" label="WP_091282021_2"/>
      <node id="2317" label="WP_116246828_1"/>
      <node id="2316" label="WP_084436210_2"/>
      <node id="2315" label="WP_099770571_1"/>
      <node id="2314" label="WP_079182634_1"/>
      <node id="2313" label="WP_086820862_1"/>
      <node id="2312" label="OOC53575_1"/>
      <node id="2311" label="WP_131785729_3"/>
      <node id="2310" label="WP_035849418_1"/>
      <node id="2309" label="WP_071129084_2"/>
      <node id="2308" label="WP_072740079_1"/>
      <node id="2307" label="WP_071042994_3"/>
      <node id="2306" label="WP_035849420_1"/>
      <node id="2305" label="PRX97761_1"/>
      <node id="2304" label="WP_016828012_1"/>
      <node id="2303" label="WP_085014620_4"/>
      <node id="2302" label="REE48080_1"/>
      <node id="2301" label="KLL12571_2"/>
      <node id="2300" label="WP_012298940_1"/>
      <node id="2299" label="WP_054567598_1"/>
      <node id="2298" label="WP_053914084_1"/>
      <node id="2297" label="WP_093849541_5"/>
      <node id="2296" label="WP_086474256_1"/>
      <node id="2295" label="WP_094051578_2"/>
      <node id="2294" label="WP_086935897_1"/>
      <node id="2293" label="WP_079135024_1"/>
      <node id="2292" label="WP_116427021_9001"/>
      <node id="2291" label="WP_027734146_9001"/>
      <node id="2290" label="WP_114021280_5"/>
      <node id="2289" label="WP_099881056_2"/>
      <node id="2288" label="WP_079171959_2"/>
      <node id="2287" label="WP_007034522_4"/>
      <node id="2286" label="WP_083715654_6"/>
      <node id="2285" label="WP_007034516_4"/>
      <node id="2284" label="ONF71727_6"/>
      <node id="2283" label="WP_104349763_3"/>
      <node id="2282" label="WP_114018158_5"/>
      <node id="2281" label="WP_079171959_3"/>
      <node id="2280" label="WP_027760735_3"/>
      <node id="2279" label="WP_079171959_4"/>
      <node id="2278" label="WP_099881056_3"/>
      <node id="2277" label="WP_104349763_1"/>
      <node id="2276" label="WP_070696063_1"/>
      <node id="2275" label="WP_079135024_2"/>
      <node id="2274" label="OEV01037_3"/>
      <node id="2273" label="WP_114021280_4"/>
      <node id="2272" label="VEG28624_4"/>
      <node id="2271" label="WP_099881056_5"/>
      <node id="2270" label="WP_114029352_7"/>
      <node id="2269" label="WP_056678071_4"/>
      <node id="2268" label="WP_114029352_9"/>
      <node id="2267" label="WP_079037558_5"/>
      <node id="2266" label="WP_126382680_4"/>
      <node id="2265" label="OEV01037_5"/>
      <node id="2264" label="WP_053587900_4"/>
      <node id="2263" label="WP_103517254_7"/>
      <node id="2262" label="WP_103517254_5"/>
      <node id="2261" label="WP_075376581_3"/>
      <node id="2260" label="WP_079135024_4"/>
      <node id="2259" label="WP_055699111_3"/>
      <node id="2258" label="EGQ75425_3"/>
      <node id="2257" label="WP_007451546_5"/>
      <node id="2256" label="WP_007451546_1"/>
      <node id="2255" label="WP_075414364_3"/>
      <node id="2254" label="WP_027760735_5"/>
      <node id="2253" label="WP_103062468_5"/>
      <node id="2252" label="WP_070696063_4"/>
      <node id="2251" label="CUM40551_4"/>
      <node id="2250" label="WP_103517254_4"/>
      <node id="2249" label="WP_103062468_4"/>
      <node id="2248" label="WP_116427021_9006"/>
      <node id="2247" label="WP_116427021_9004"/>
      <node id="2246" label="KUJ49673_2"/>
      <node id="2245" label="WP_007451546_3"/>
      <node id="2244" label="WP_026408316_3"/>
      <node id="2243" label="WP_103062468_2"/>
      <node id="2242" label="WP_030288747_3"/>
      <node id="2241" label="WP_079037558_3"/>
      <node id="2240" label="OJH69022_3"/>
      <node id="2239" label="AJM78300_2"/>
      <node id="2238" label="WP_039637774_4"/>
      <node id="2237" label="WP_116427021_9005"/>
      <node id="2236" label="WP_136217272_3"/>
      <node id="2235" label="WP_019617890_2"/>
      <node id="2234" label="OEV01037_4"/>
      <node id="2233" label="WP_007451546_4"/>
      <node id="2232" label="WP_093640559_3"/>
      <node id="2231" label="WP_030257607_3"/>
      <node id="2230" label="CUM40551_1"/>
      <node id="2229" label="WP_017177897_4"/>
      <node id="2228" label="WP_055699111_4"/>
      <node id="2227" label="WP_114018158_3"/>
      <node id="2226" label="WP_056678071_3"/>
      <node id="2225" label="WP_039637774_3"/>
      <node id="2224" label="WP_055699111_2"/>
      <node id="2223" label="WP_017177897_1"/>
      <node id="2222" label="WP_056678071_2"/>
      <node id="2221" label="WP_111035529_2"/>
      <node id="2220" label="WP_093640559_1"/>
      <node id="2219" label="WP_093640559_2"/>
      <node id="2218" label="WP_084416050_2"/>
      <node id="2217" label="WP_053587900_6"/>
      <node id="2216" label="WP_103062468_1"/>
      <node id="2215" label="WP_104349763_2"/>
      <node id="2214" label="CUM40551_2"/>
      <node id="2213" label="WP_053587900_7"/>
      <node id="2212" label="WP_114021280_2"/>
      <node id="2211" label="WP_030257607_1"/>
      <node id="2210" label="WP_126890470_3"/>
      <node id="2209" label="WP_114029352_4"/>
      <node id="2208" label="WP_114029352_6"/>
      <node id="2207" label="WP_079037558_2"/>
      <node id="2206" label="WP_007269626_2"/>
      <node id="2205" label="WP_103517254_2"/>
      <node id="2204" label="WP_007451546_2"/>
      <node id="2203" label="WP_114029352_3"/>
      <node id="2202" label="WP_079135024_3"/>
      <node id="2201" label="WP_027760735_4"/>
      <node id="2200" label="WP_114029352_5"/>
      <node id="2199" label="OJH69022_2"/>
      <node id="2198" label="WP_030288747_4"/>
      <node id="2197" label="OJH69022_4"/>
      <node id="2196" label="WP_099881056_4"/>
      <node id="2195" label="WP_053587900_5"/>
      <node id="2194" label="WP_017177897_2"/>
      <node id="2193" label="WP_007034516_3"/>
      <node id="2192" label="WP_070696063_5"/>
      <node id="2191" label="WP_018090000_1"/>
      <node id="2190" label="WP_136217272_1"/>
      <node id="2189" label="WP_053690379_2"/>
      <node id="2188" label="WP_046777828_4"/>
      <node id="2187" label="WP_034253534_3"/>
      <node id="2186" label="WP_043563867_2"/>
      <node id="2185" label="WP_124933089_3"/>
      <node id="2184" label="WP_039637774_1"/>
      <node id="2183" label="WP_007269626_3"/>
      <node id="2182" label="WP_027734146_9005"/>
      <node id="2181" label="WP_019617890_4"/>
      <node id="2180" label="WP_104276858_4"/>
      <node id="2179" label="WP_053690379_3"/>
      <node id="2178" label="WP_111166051_6"/>
      <node id="2177" label="WP_113979657_3"/>
      <node id="2176" label="WP_086575168_1"/>
      <node id="2175" label="KUJ49673_7"/>
      <node id="2174" label="EMF02011_1"/>
      <node id="2173" label="WP_040887728_1"/>
      <node id="2172" label="WP_076971825_1"/>
      <node id="2171" label="AEV84085_2"/>
      <node id="2170" label="WP_089295762_2"/>
      <node id="2169" label="WP_093614914_1"/>
      <node id="2168" label="WP_136217272_2"/>
      <node id="2167" label="WP_027760735_2"/>
      <node id="2166" label="WP_093640559_5"/>
      <node id="2165" label="WP_083304061_1"/>
      <node id="2164" label="WP_053690379_1"/>
      <node id="2163" label="OFL66352_3"/>
      <node id="2162" label="WP_046777828_3"/>
      <node id="2161" label="WP_083318853_3"/>
      <node id="2160" label="WP_083318853_1"/>
      <node id="2159" label="WP_083304061_3"/>
      <node id="2158" label="WP_075417427_3"/>
      <node id="2157" label="WP_073452776_3"/>
      <node id="2156" label="OEV01037_2"/>
      <node id="2155" label="WP_114018158_4"/>
      <node id="2154" label="ONF71727_2"/>
      <node id="2153" label="WP_007034522_2"/>
      <node id="2152" label="WP_072028150_1"/>
      <node id="2151" label="WP_083715654_2"/>
      <node id="2150" label="WP_030257607_2"/>
      <node id="2149" label="WP_042733817_3"/>
      <node id="2148" label="WP_104276858_3"/>
      <node id="2147" label="WP_051471145_3"/>
      <node id="2146" label="CUM40551_3"/>
      <node id="2145" label="WP_055699111_5"/>
      <node id="2144" label="WP_030257607_4"/>
      <node id="2143" label="WP_114018158_2"/>
      <node id="2142" label="WP_030288747_2"/>
      <node id="2141" label="ADI05355_1"/>
      <node id="2140" label="WP_083715654_4"/>
      <node id="2139" label="ONF71727_4"/>
      <node id="2138" label="WP_081707409_3"/>
      <node id="2137" label="WP_125229237_1"/>
      <node id="2136" label="WP_079171959_5"/>
      <node id="2135" label="WP_055699111_1"/>
      <node id="2134" label="WP_042733817_1"/>
      <node id="2133" label="WP_056678071_5"/>
      <node id="2132" label="WP_070696063_3"/>
      <node id="2131" label="WP_017177897_3"/>
      <node id="2130" label="WP_017177815_3"/>
      <node id="2129" label="WP_026426216_3"/>
      <node id="2128" label="WP_075405296_3"/>
      <node id="2127" label="WP_075412233_3"/>
      <node id="2126" label="WP_126414579_3"/>
      <node id="2125" label="WP_009405321_3"/>
      <node id="2124" label="WP_076252265_1"/>
      <node id="2123" label="WP_027734146_9006"/>
      <node id="2122" label="WP_039637774_2"/>
      <node id="2121" label="WP_114021280_3"/>
      <node id="2120" label="OFL66352_1"/>
      <node id="2119" label="WP_053587900_3"/>
      <node id="2118" label="WP_007034522_5"/>
      <node id="2117" label="ONF71727_3"/>
      <node id="2116" label="WP_046777828_5"/>
      <node id="2115" label="WP_051325718_3"/>
      <node id="2114" label="WP_055480275_1"/>
      <node id="2113" label="KUJ49673_4"/>
      <node id="2112" label="WP_051471145_1"/>
      <node id="2111" label="WP_052311581_2"/>
      <node id="2110" label="WP_055480275_2"/>
      <node id="2109" label="WP_103517254_3"/>
      <node id="2108" label="WP_027734146_9002"/>
      <node id="2107" label="WP_019617890_3"/>
      <node id="2106" label="WP_007034522_3"/>
      <node id="2105" label="WP_043489503_1"/>
      <node id="2104" label="WP_007034516_1"/>
      <node id="2103" label="WP_055480275_3"/>
      <node id="2102" label="WP_083715654_3"/>
      <node id="2101" label="WP_007034516_2"/>
      <node id="2100" label="WP_007034516_5"/>
      <node id="2099" label="WP_122977382_2"/>
      <node id="2098" label="WP_089510240_2"/>
      <node id="2097" label="WP_079037558_4"/>
      <node id="2096" label="WP_104276858_2"/>
      <node id="2095" label="WP_125229237_2"/>
      <node id="2094" label="WP_051471145_2"/>
      <node id="2093" label="WP_007034522_1"/>
      <node id="2092" label="WP_052038751_1"/>
      <node id="2091" label="WP_129283158_2"/>
      <node id="2090" label="WP_062097999_1"/>
      <node id="2089" label="WP_128397239_1"/>
      <node id="2088" label="WP_057576508_6"/>
      <node id="2087" label="WP_052038751_2"/>
      <node id="2086" label="WP_076825825_5"/>
      <node id="2085" label="WP_028265499_4"/>
      <node id="2084" label="WP_018500447_2"/>
      <node id="2083" label="WP_100045344_1"/>
      <node id="2082" label="WP_073943269_3"/>
      <node id="2081" label="WP_133928419_2"/>
      <node id="2080" label="WP_057576508_5"/>
      <node id="2079" label="WP_121405200_2"/>
      <node id="2078" label="WP_018500447_1"/>
      <node id="2077" label="WP_073943269_1"/>
      <node id="2076" label="WP_100045344_2"/>
      <node id="2075" label="WP_024818115_3"/>
      <node id="2074" label="WP_104263679_6"/>
      <node id="2073" label="WP_031072263_5"/>
      <node id="2072" label="WP_131746916_1"/>
      <node id="2071" label="WP_060180042_1"/>
      <node id="2070" label="WP_093544729_2"/>
      <node id="2069" label="WP_078909294_4"/>
      <node id="2068" label="WP_133928419_1"/>
      <node id="2067" label="AOY69839_3"/>
      <node id="2066" label="WP_128397239_2"/>
      <node id="2065" label="WP_031216848_3"/>
      <node id="2064" label="WP_024818115_1"/>
      <node id="2063" label="WP_089596247_1"/>
      <node id="2062" label="WP_087133921_1"/>
      <node id="2061" label="WP_055478352_1"/>
      <node id="2060" label="WP_078909294_6"/>
      <node id="2059" label="SCD31130_2"/>
      <node id="2058" label="WP_107442966_4"/>
      <node id="2057" label="WP_055478352_2"/>
      <node id="2056" label="WP_061783869_6"/>
      <node id="2055" label="WP_116246380_2"/>
      <node id="2054" label="WP_060180042_3"/>
      <node id="2053" label="WP_031012255_3"/>
      <node id="2052" label="WP_076045700_2"/>
      <node id="2051" label="AFR30485_1"/>
      <node id="2050" label="WP_026542026_3"/>
      <node id="2049" label="AOY69839_1"/>
      <node id="2048" label="WP_062097999_3"/>
      <node id="2047" label="WP_094737915_3"/>
      <node id="2046" label="WP_057576508_2"/>
      <node id="2045" label="WP_076825825_4"/>
      <node id="2044" label="WP_107442966_3"/>
      <node id="2043" label="WP_061783869_5"/>
      <node id="2042" label="WP_061783869_2"/>
      <node id="2041" label="WP_055478352_3"/>
      <node id="2040" label="WP_104263679_4"/>
      <node id="2039" label="WP_031012255_2"/>
      <node id="2038" label="WP_127571148_4"/>
      <node id="2037" label="SCZ59071_3"/>
      <node id="2036" label="WP_062071474_1"/>
      <node id="2035" label="WP_105691909_3"/>
      <node id="2034" label="WP_026542026_2"/>
      <node id="2033" label="AFR30485_3"/>
      <node id="2032" label="WP_097165202_4"/>
      <node id="2031" label="WP_105691909_1"/>
      <node id="2030" label="SCZ59071_2"/>
      <node id="2029" label="SCZ59071_1"/>
      <node id="2028" label="WP_062097999_2"/>
      <node id="2027" label="WP_091325076_2"/>
      <node id="2026" label="WP_031216848_2"/>
      <node id="2025" label="AOY69839_2"/>
      <node id="2024" label="WP_062071474_2"/>
      <node id="2023" label="WP_031216848_1"/>
      <node id="2022" label="WP_043470682_1"/>
      <node id="2021" label="WP_091470208_2"/>
      <node id="2020" label="WP_128397239_3"/>
      <node id="2019" label="WP_091325076_1"/>
      <node id="2018" label="WP_089596247_2"/>
      <node id="2017" label="WP_107442966_1"/>
      <node id="2016" label="WP_107442966_2"/>
      <node id="2015" label="WP_057576508_1"/>
      <node id="2014" label="WP_061783869_4"/>
      <node id="2013" label="WP_121405200_1"/>
      <node id="2012" label="WP_078909294_2"/>
      <node id="2011" label="WP_116246380_3"/>
      <node id="2010" label="WP_024818115_2"/>
      <node id="2009" label="WP_028265499_3"/>
      <node id="2008" label="WP_062071474_3"/>
      <node id="2007" label="WP_061783869_3"/>
      <node id="2006" label="WP_116246380_4"/>
      <node id="2005" label="WP_031072263_4"/>
      <node id="2004" label="WP_091273394_5"/>
      <node id="2003" label="WP_091273394_2"/>
      <node id="2002" label="WP_129283158_4"/>
      <node id="2001" label="WP_129176857_4"/>
      <node id="2000" label="WP_031012255_5"/>
      <node id="1999" label="WP_015618321_2"/>
      <node id="1998" label="WP_078909294_3"/>
      <node id="1997" label="WP_091470208_3"/>
      <node id="1996" label="WP_089596247_3"/>
      <node id="1995" label="WP_094737915_2"/>
      <node id="1994" label="WP_105691909_2"/>
      <node id="1993" label="WP_091470208_1"/>
      <node id="1992" label="WP_097165202_5"/>
      <node id="1991" label="WP_104263679_5"/>
      <node id="1990" label="WP_031072263_2"/>
      <node id="1989" label="WP_018500447_4"/>
      <node id="1988" label="WP_131746916_2"/>
      <node id="1987" label="WP_015618321_7"/>
      <node id="1986" label="WP_031072263_6"/>
      <node id="1985" label="WP_091273394_3"/>
      <node id="1984" label="WP_076825825_1"/>
      <node id="1983" label="WP_091273394_1"/>
      <node id="1982" label="WP_076825825_3"/>
      <node id="1981" label="WP_015618321_3"/>
      <node id="1980" label="WP_043470682_2"/>
      <node id="1979" label="AFR30485_2"/>
      <node id="1978" label="WP_043470682_3"/>
      <node id="1977" label="WP_031072263_3"/>
      <node id="1976" label="WP_028265499_2"/>
      <node id="1975" label="WP_107778338_2"/>
      <node id="1974" label="WP_026542026_1"/>
      <node id="1973" label="WP_097165202_3"/>
      <node id="1972" label="WP_127571148_2"/>
      <node id="1971" label="WP_015618321_6"/>
      <node id="1970" label="WP_015618321_4"/>
      <node id="1969" label="WP_129176857_2"/>
      <node id="1968" label="WP_093601012_3"/>
      <node id="1967" label="SFK92414_2"/>
      <node id="1966" label="WP_125792333_2"/>
      <node id="1965" label="WP_129283158_5"/>
      <node id="1964" label="WP_091325076_3"/>
      <node id="1963" label="WP_107778339_2"/>
      <node id="1962" label="WP_082115047_1"/>
      <node id="1961" label="WP_018500447_3"/>
      <node id="1960" label="WP_083679341_2"/>
      <node id="1959" label="RUP01435_4"/>
      <node id="1958" label="WP_083046415_2"/>
      <node id="1957" label="WP_083271029_4"/>
      <node id="1956" label="OMC41183_2"/>
      <node id="1955" label="WP_083271029_5"/>
      <node id="1954" label="OMC50887_2"/>
      <node id="1953" label="ODR23958_4"/>
      <node id="1952" label="ODR23958_3"/>
      <node id="1951" label="WP_085673959_1"/>
      <node id="1950" label="EUA04475_1"/>
      <node id="1949" label="WP_085250966_3"/>
      <node id="1948" label="WP_063469930_1"/>
      <node id="1947" label="OOK63274_4"/>
      <node id="1946" label="OOK63274_3"/>
      <node id="1945" label="EUA04475_2"/>
      <node id="1944" label="OOK66964_3"/>
      <node id="1943" label="WP_023370892_3"/>
      <node id="1942" label="WP_055578070_4"/>
      <node id="1941" label="WP_085323284_3"/>
      <node id="1940" label="WP_085160326_2"/>
      <node id="1939" label="WP_133437797_3"/>
      <node id="1938" label="WP_083271029_3"/>
      <node id="1937" label="WP_065136618_4"/>
      <node id="1936" label="WP_122441228_2"/>
      <node id="1935" label="WP_079099227_2"/>
      <node id="1934" label="WP_085249702_4"/>
      <node id="1933" label="WP_085670073_2"/>
      <node id="1932" label="SGD85762_2"/>
      <node id="1931" label="WP_065136618_2"/>
      <node id="1930" label="WP_067240547_1"/>
      <node id="1929" label="CKX97298_2"/>
      <node id="1928" label="AUS50474_3"/>
      <node id="1927" label="ODR23958_5"/>
      <node id="1926" label="WP_082275447_2"/>
      <node id="1925" label="ORC04864_1"/>
      <node id="1924" label="WP_083115253_1"/>
      <node id="1923" label="KAU25380_2"/>
      <node id="1922" label="CFS33831_2"/>
      <node id="1921" label="WP_075911259_2"/>
      <node id="1920" label="COV92604_2"/>
      <node id="1919" label="WP_065136618_3"/>
      <node id="1918" label="WP_083113299_3"/>
      <node id="1917" label="WP_085670625_2"/>
      <node id="1916" label="WP_085673959_2"/>
      <node id="1915" label="WP_085673955_3"/>
      <node id="1914" label="OOK66964_1"/>
      <node id="1913" label="WP_023370892_2"/>
      <node id="1912" label="WP_031737334_2"/>
      <node id="1911" label="WP_083115648_2"/>
      <node id="1910" label="WP_085105271_2"/>
      <node id="1909" label="WP_085252934_2"/>
      <node id="1908" label="EUA05503_2"/>
      <node id="1907" label="WP_083102943_2"/>
      <node id="1906" label="WP_051490166_1"/>
      <node id="1905" label="WP_122530149_2"/>
      <node id="1904" label="OOK83994_3"/>
      <node id="1903" label="AKR01079_2"/>
      <node id="1902" label="WP_086155057_2"/>
      <node id="1901" label="COV23412_2"/>
      <node id="1900" label="COV81994_3"/>
      <node id="1899" label="WP_085673083_1"/>
      <node id="1898" label="ORA12704_3"/>
      <node id="1897" label="KCR02833_2"/>
      <node id="1896" label="ORW98956_1"/>
      <node id="1895" label="WP_085670073_3"/>
      <node id="1894" label="WP_085673955_2"/>
      <node id="1893" label="EGE49931_2"/>
      <node id="1892" label="CFR67737_1"/>
      <node id="1891" label="WP_065164254_3"/>
      <node id="1890" label="EGB29232_2"/>
      <node id="1889" label="WP_085671380_1"/>
      <node id="1888" label="WP_083115866_3"/>
      <node id="1887" label="VDM88753_2"/>
      <node id="1886" label="WP_085671453_2"/>
      <node id="1885" label="WP_085671318_2"/>
      <node id="1884" label="WP_099887535_4"/>
      <node id="1883" label="WP_005477225_2"/>
      <node id="1882" label="KPC62607_2"/>
      <node id="1881" label="WP_079177123_3"/>
      <node id="1880" label="WP_094009173_3"/>
      <node id="1879" label="OIJ88146_3"/>
      <node id="1878" label="WP_053676554_4"/>
      <node id="1877" label="WP_107308000_3"/>
      <node id="1876" label="WP_124286732_5"/>
      <node id="1875" label="WP_078971081_2"/>
      <node id="1874" label="WP_099279259_2"/>
      <node id="1873" label="WP_086861034_1"/>
      <node id="1872" label="WP_059082757_2"/>
      <node id="1871" label="GAQ65395_3"/>
      <node id="1870" label="WP_007495061_2"/>
      <node id="1869" label="WP_093603917_1"/>
      <node id="1868" label="WP_030065831_1"/>
      <node id="1867" label="WP_023554016_2"/>
      <node id="1866" label="WP_006347379_2"/>
      <node id="1865" label="WP_018568344_1"/>
      <node id="1864" label="WP_057611617_6"/>
      <node id="1863" label="WP_123074529_6"/>
      <node id="1862" label="WP_053747924_2"/>
      <node id="1861" label="WP_088799362_1"/>
      <node id="1860" label="WP_037881970_1"/>
      <node id="1859" label="WP_030040480_3"/>
      <node id="1858" label="WP_131735418_3"/>
      <node id="1857" label="WP_111415595_2"/>
      <node id="1856" label="WP_097276114_2"/>
      <node id="1855" label="WP_059190156_3"/>
      <node id="1854" label="WP_087885333_3"/>
      <node id="1853" label="WP_023550873_8"/>
      <node id="1852" label="WP_018522479_4"/>
      <node id="1851" label="WP_116154877_5"/>
      <node id="1850" label="RED74809_5"/>
      <node id="1849" label="WP_134664144_3"/>
      <node id="1848" label="WP_129292093_3"/>
      <node id="1847" label="WP_030570393_2"/>
      <node id="1846" label="PKV33869_4"/>
      <node id="1845" label="WP_057608322_2"/>
      <node id="1844" label="WP_103341360_4"/>
      <node id="1843" label="WP_101385752_2"/>
      <node id="1842" label="WP_086702179_2"/>
      <node id="1841" label="WP_028441277_4"/>
      <node id="1840" label="WP_086861034_3"/>
      <node id="1839" label="WP_101404757_4"/>
      <node id="1838" label="WP_027655653_1"/>
      <node id="1837" label="WP_131980226_1"/>
      <node id="1836" label="WP_018962008_1"/>
      <node id="1835" label="WP_017595616_2"/>
      <node id="1834" label="WP_030193566_1"/>
      <node id="1833" label="WP_071375573_1"/>
      <node id="1832" label="WP_091117929_1"/>
      <node id="1831" label="WP_106236748_1"/>
      <node id="1830" label="WP_093545912_1"/>
      <node id="1829" label="WP_099282405_1"/>
      <node id="1828" label="WP_115912935_2"/>
      <node id="1827" label="WP_078593643_1"/>
      <node id="1826" label="WP_081983063_6"/>
      <node id="1825" label="WP_128508010_2"/>
      <node id="1824" label="WP_127176619_1"/>
      <node id="1823" label="WP_125511014_1"/>
      <node id="1822" label="WP_073787016_1"/>
      <node id="1821" label="WP_078859808_4"/>
      <node id="1820" label="WP_023544308_2"/>
      <node id="1819" label="WP_123082011_3"/>
      <node id="1818" label="WP_046930162_5"/>
      <node id="1817" label="WP_127149214_3"/>
      <node id="1816" label="WP_116209352_2"/>
      <node id="1815" label="WP_107105767_1"/>
      <node id="1814" label="WP_130877472_3"/>
      <node id="1813" label="WP_031052551_1"/>
      <node id="1812" label="WP_073483171_2"/>
      <node id="1811" label="WP_035804978_2"/>
      <node id="1810" label="WP_076159164_4"/>
      <node id="1809" label="WP_061988205_1"/>
      <node id="1808" label="RPK69291_2"/>
      <node id="1807" label="WP_124271723_2"/>
      <node id="1806" label="WP_073735916_2"/>
      <node id="1805" label="WP_043911856_1"/>
      <node id="1804" label="BAN83923_2"/>
      <node id="1803" label="WP_039653092_1"/>
      <node id="1802" label="WP_065848698_1"/>
      <node id="1801" label="WP_020218383_1"/>
      <node id="1800" label="WP_132268317_2"/>
      <node id="1799" label="WP_117401161_2"/>
      <node id="1798" label="WP_030172142_2"/>
      <node id="1797" label="WP_111862863_2"/>
      <node id="1796" label="WP_132268319_2"/>
      <node id="1795" label="WP_117401160_2"/>
      <node id="1794" label="WP_062343137_1"/>
      <node id="1793" label="WP_132388266_2"/>
      <node id="1792" label="WP_062428472_1"/>
      <node id="1791" label="WP_116026136_3"/>
      <node id="1790" label="WP_030455410_1"/>
      <node id="1789" label="SDH11838_4"/>
      <node id="1788" label="WP_113982324_1"/>
      <node id="1787" label="WP_132388264_2"/>
      <node id="1786" label="WP_061300721_2"/>
      <node id="1785" label="WP_116026137_3"/>
      <node id="1784" label="WP_093170943_2"/>
      <node id="1783" label="WP_111169117_3"/>
      <node id="1782" label="WP_061300720_2"/>
      <node id="1781" label="WP_062428474_1"/>
      <node id="1780" label="WP_030455409_1"/>
      <node id="1779" label="WP_062343135_1"/>
      <node id="1778" label="WP_093170892_4"/>
      <node id="1777" label="WP_111862862_2"/>
      <node id="1776" label="WP_030172139_2"/>
      <node id="1775" label="WP_061300719_2"/>
      <node id="1774" label="WP_113982325_1"/>
      <node id="1773" label="WP_030455411_1"/>
      <node id="1772" label="WP_131965734_1"/>
      <node id="1771" label="WP_062428470_1"/>
      <node id="1770" label="WP_020218384_1"/>
      <node id="1769" label="WP_131965735_1"/>
      <node id="1768" label="QBI53056_9003"/>
      <node id="1767" label="WP_067348529_9007"/>
      <node id="1766" label="WP_131102102_9005"/>
      <node id="1765" label="WP_086561055_9001"/>
      <node id="1764" label="AKJ11412_1"/>
      <node id="1763" label="WP_086561060_1"/>
      <node id="1762" label="WP_124934052_9002"/>
      <node id="1761" label="WP_030578068_9010"/>
      <node id="1760" label="WP_073444401_9009"/>
      <node id="1759" label="EJJ05683_1"/>
      <node id="1758" label="WP_124934048_2"/>
      <node id="1757" label="WP_131097488_1"/>
      <node id="1756" label="OLO56996_1"/>
      <node id="1755" label="OLO57000_9001"/>
      <node id="1754" label="WP_120727774_9003"/>
      <node id="1753" label="QBI53056_9006"/>
      <node id="1752" label="WP_131097488_2"/>
      <node id="1751" label="WP_067348529_9006"/>
      <node id="1750" label="WP_051709136_3"/>
      <node id="1749" label="WP_093656413_2"/>
      <node id="1748" label="WP_014690715_9002"/>
      <node id="1747" label="WP_067348529_9005"/>
      <node id="1746" label="WP_073444401_9006"/>
      <node id="1745" label="WP_030578068_9013"/>
      <node id="1744" label="WP_051007002_1"/>
      <node id="1743" label="WP_017535900_9002"/>
      <node id="1742" label="WP_131102102_9002"/>
      <node id="1741" label="EJJ05688_9003"/>
      <node id="1740" label="AKJ11407_9005"/>
      <node id="1739" label="WP_040899039_9002"/>
      <node id="1738" label="WP_002518052_2"/>
      <node id="1737" label="WP_107307769_1"/>
      <node id="1736" label="WP_124286732_1"/>
      <node id="1735" label="WP_107308000_1"/>
      <node id="1734" label="WP_050514186_3"/>
      <node id="1733" label="WP_086702179_1"/>
      <node id="1732" label="WP_030570393_1"/>
      <node id="1731" label="WP_069774196_2"/>
      <node id="1730" label="WP_053676554_2"/>
      <node id="1729" label="OIJ88146_1"/>
      <node id="1728" label="WP_099887535_1"/>
      <node id="1727" label="WP_129292093_1"/>
      <node id="1726" label="WP_028441277_1"/>
      <node id="1725" label="RED74809_1"/>
      <node id="1724" label="WP_099279259_1"/>
      <node id="1723" label="WP_018522479_1"/>
      <node id="1722" label="WP_057608322_1"/>
      <node id="1721" label="WP_078971081_1"/>
      <node id="1720" label="WP_134664144_1"/>
      <node id="1719" label="WP_023550873_1"/>
      <node id="1718" label="PKV33869_3"/>
      <node id="1717" label="WP_079177123_1"/>
      <node id="1716" label="EMF26273_1"/>
      <node id="1715" label="WP_005477225_1"/>
      <node id="1714" label="KPC62607_1"/>
      <node id="1713" label="WP_123074529_1"/>
      <node id="1712" label="WP_101385752_1"/>
      <node id="1711" label="WP_116154877_1"/>
      <node id="1710" label="WP_094009173_2"/>
      <node id="1709" label="WP_136207038_1"/>
      <node id="1708" label="CCB71037_3"/>
      <node id="1707" label="EGY78124_1"/>
      <node id="1706" label="KCR02833_1"/>
      <node id="1705" label="WP_131103335_1"/>
      <node id="1704" label="KAU25380_1"/>
      <node id="1703" label="WP_078590495_3"/>
      <node id="1702" label="WP_124934048_1"/>
      <node id="1701" label="AGL26862_2"/>
      <node id="1700" label="WP_012360880_1"/>
      <node id="1699" label="EGE49931_1"/>
      <node id="1698" label="WP_136207038_3"/>
      <node id="1697" label="WP_125614105_4"/>
      <node id="1696" label="WP_080564860_2"/>
      <node id="1695" label="ERS23150_1"/>
      <node id="1694" label="WP_069774196_1"/>
      <node id="1693" label="WP_113984581_1"/>
      <node id="1692" label="WP_083926625_1"/>
      <node id="1691" label="WP_064833209_1"/>
      <node id="1690" label="OBA55656_2"/>
      <node id="1689" label="WP_136207038_4"/>
      <node id="1688" label="WP_084253023_4"/>
      <node id="1687" label="CBG72692_2"/>
      <node id="1686" label="WP_020115555_2"/>
      <node id="1685" label="WP_100243842_2"/>
      <node id="1684" label="WP_059081255_2"/>
      <node id="1683" label="WP_005486705_2"/>
      <node id="1682" label="AFV25482_3"/>
      <node id="1681" label="WP_019887077_1"/>
      <node id="1680" label="WP_019549855_1"/>
      <node id="1679" label="WP_109280137_2"/>
      <node id="1678" label="WP_048819674_2"/>
      <node id="1677" label="EKX68554_2"/>
      <node id="1676" label="EKX68557_2"/>
      <node id="1675" label="GAQ63669_2"/>
      <node id="1674" label="AFU90402_2"/>
      <node id="1673" label="WP_109280200_2"/>
      <node id="1672" label="WP_013003263_1"/>
      <node id="1671" label="WP_059081288_2"/>
      <node id="1670" label="WP_019887079_1"/>
      <node id="1669" label="EMF50559_2"/>
      <node id="1668" label="AFV25483_2"/>
      <node id="1667" label="WP_084253023_5"/>
      <node id="1666" label="WP_064833216_2"/>
      <node id="1665" label="WP_064833209_3"/>
      <node id="1664" label="WP_051268851_1"/>
      <node id="1663" label="WP_051268851_2"/>
      <node id="1662" label="WP_106109998_1"/>
      <node id="1661" label="WP_058623611_3"/>
      <node id="1660" label="KTR94659_2"/>
      <node id="1659" label="WP_053775070_3"/>
      <node id="1658" label="WP_081323045_2"/>
      <node id="1657" label="WP_053775076_1"/>
      <node id="1656" label="WP_106109992_1"/>
      <node id="1655" label="WP_081323045_9002"/>
      <node id="1654" label="WP_058623611_2"/>
      <node id="1653" label="WP_084253025_1"/>
      <node id="1652" label="KTR94659_9002"/>
      <node id="1651" label="WP_123292376_2"/>
      <node id="1650" label="WP_053775076_9003"/>
      <node id="1649" label="WP_053775070_4"/>
      <node id="1648" label="WP_123292368_1"/>
      <node id="1647" label="AKP09252_1"/>
      <node id="1646" label="AFK17249_1"/>
      <node id="1645" label="WP_088290452_1"/>
      <node id="1644" label="WP_038620030_1"/>
      <node id="1643" label="WP_048589183_1"/>
      <node id="1642" label="WP_061409829_1"/>
      <node id="1641" label="WP_087454409_1"/>
      <node id="1640" label="ESU58068_1"/>
      <node id="1639" label="BAM28031_1"/>
      <node id="1638" label="WP_087454414_1"/>
      <node id="1637" label="AIG09585_1"/>
      <node id="1636" label="WP_046096646_1"/>
      <node id="1635" label="WP_075142776_1"/>
      <node id="1634" label="WP_088264775_1"/>
      <node id="1633" label="WP_043014356_1"/>
      <node id="1632" label="WP_070795263_1"/>
      <node id="1631" label="WP_088246551_1"/>
      <node id="1630" label="WP_054468484_1"/>
      <node id="1629" label="OMO45941_1"/>
      <node id="1628" label="WP_062440803_2"/>
      <node id="1627" label="WP_062349267_2"/>
      <node id="1626" label="SFR28131_2"/>
      <node id="1625" label="WP_015622289_4"/>
      <node id="1624" label="WP_062349267_4"/>
      <node id="1623" label="WP_093603934_2"/>
      <node id="1622" label="WP_084316863_3"/>
      <node id="1621" label="WP_049570352_1"/>
      <node id="1620" label="WP_066366076_2"/>
      <node id="1619" label="WP_111167565_2"/>
      <node id="1618" label="WP_061300623_2"/>
      <node id="1617" label="WP_015622289_2"/>
      <node id="1616" label="WP_062440803_3"/>
      <node id="1615" label="WP_066366076_5"/>
      <node id="1614" label="WP_114029832_2"/>
      <node id="1613" label="WP_113985589_2"/>
      <node id="1612" label="WP_111167565_3"/>
      <node id="1611" label="WP_075412233_2"/>
      <node id="1610" label="WP_075846085_1"/>
      <node id="1609" label="WP_026426216_2"/>
      <node id="1608" label="WP_075405296_2"/>
      <node id="1607" label="VEG28624_2"/>
      <node id="1606" label="EGQ75425_2"/>
      <node id="1605" label="WP_075376581_2"/>
      <node id="1604" label="WP_126382680_2"/>
      <node id="1603" label="WP_126414579_2"/>
      <node id="1602" label="WP_026408316_2"/>
      <node id="1601" label="WP_075417427_2"/>
      <node id="1600" label="WP_009405321_1"/>
      <node id="1599" label="WP_034253534_2"/>
      <node id="1598" label="WP_075375613_2"/>
      <node id="1597" label="WP_075414364_2"/>
      <node id="1596" label="WP_124933089_2"/>
      <node id="1595" label="WP_075412233_1"/>
      <node id="1594" label="WP_026426216_1"/>
      <node id="1593" label="WP_126414579_1"/>
      <node id="1592" label="WP_124933089_1"/>
      <node id="1591" label="WP_026408316_1"/>
      <node id="1590" label="WP_075405296_1"/>
      <node id="1589" label="VEG28624_1"/>
      <node id="1588" label="WP_034253534_1"/>
      <node id="1587" label="WP_075375613_1"/>
      <node id="1586" label="WP_075414364_1"/>
      <node id="1585" label="WP_126382680_1"/>
      <node id="1584" label="WP_075417427_1"/>
      <node id="1583" label="WP_009405321_2"/>
      <node id="1582" label="WP_075376581_1"/>
      <node id="1581" label="EGQ75425_1"/>
      <node id="1580" label="WP_077692191_2"/>
      <node id="1579" label="WP_017596140_1"/>
      <node id="1578" label="WP_017617728_1"/>
      <node id="1577" label="WP_097636337_1"/>
      <node id="1576" label="WP_017563703_1"/>
      <node id="1575" label="WP_087102102_3"/>
      <node id="1574" label="WP_017615044_1"/>
      <node id="1573" label="WP_047868005_1"/>
      <node id="1572" label="WP_075924874_2"/>
      <node id="1571" label="WP_053619387_2"/>
      <node id="1570" label="PSK95408_1"/>
      <node id="1569" label="WP_121183327_2"/>
      <node id="1568" label="WP_073704754_3"/>
      <node id="1567" label="WP_017589866_5"/>
      <node id="1566" label="WP_075814930_1"/>
      <node id="1565" label="WP_026542026_4"/>
      <node id="1564" label="WP_105691909_4"/>
      <node id="1563" label="WP_089596247_4"/>
      <node id="1562" label="WP_091470208_4"/>
      <node id="1561" label="SCZ59071_4"/>
      <node id="1560" label="WP_062071474_4"/>
      <node id="1559" label="WP_028265499_5"/>
      <node id="1558" label="WP_043470682_4"/>
      <node id="1557" label="WP_031216848_4"/>
      <node id="1556" label="AOY69839_4"/>
      <node id="1555" label="WP_062097999_4"/>
      <node id="1554" label="WP_128397239_4"/>
      <node id="1553" label="AFR30485_4"/>
      <node id="1552" label="WP_024818115_4"/>
      <node id="1551" label="WP_085673955_1"/>
      <node id="1550" label="WP_085160326_1"/>
      <node id="1549" label="WP_083046415_1"/>
      <node id="1548" label="WP_065164254_1"/>
      <node id="1547" label="WP_075510821_2"/>
      <node id="1546" label="WP_122442751_2"/>
      <node id="1545" label="WP_055578070_2"/>
      <node id="1544" label="WP_036403339_3"/>
      <node id="1543" label="ORC04413_2"/>
      <node id="1542" label="WP_086085423_2"/>
      <node id="1541" label="WP_085249702_3"/>
      <node id="1540" label="RUP01435_3"/>
      <node id="1539" label="EPQ80131_3"/>
      <node id="1538" label="OOK64193_1"/>
      <node id="1537" label="SGD85762_1"/>
      <node id="1536" label="WP_086155057_1"/>
      <node id="1535" label="WP_075911259_1"/>
      <node id="1534" label="COV23412_1"/>
      <node id="1533" label="WP_031737334_1"/>
      <node id="1532" label="AKR01079_1"/>
      <node id="1531" label="COV81994_1"/>
      <node id="1530" label="EGB29232_1"/>
      <node id="1529" label="CKX97298_1"/>
      <node id="1528" label="EFD73056_2"/>
      <node id="1527" label="CFS33831_1"/>
      <node id="1526" label="COV92604_1"/>
      <node id="1525" label="WP_079099227_1"/>
      <node id="1524" label="WP_019885858_2"/>
      <node id="1523" label="WP_015663091_1"/>
      <node id="1522" label="WP_114626704_1"/>
      <node id="1521" label="WP_121801511_3"/>
      <node id="1520" label="WP_033309246_1"/>
      <node id="1519" label="WP_055633699_1"/>
      <node id="1518" label="WP_084521174_1"/>
      <node id="1517" label="WP_079611677_1"/>
      <node id="1516" label="WP_100521517_1"/>
      <node id="1515" label="WP_030794381_3"/>
      <node id="1514" label="YP_008998156_1"/>
      <node id="1513" label="WP_100806338_4"/>
      <node id="1512" label="WP_082822395_2"/>
      <node id="1511" label="EKX68554_1"/>
      <node id="1510" label="WP_059081255_1"/>
      <node id="1509" label="EKX68557_1"/>
      <node id="1508" label="EMF50559_1"/>
      <node id="1507" label="WP_005486705_1"/>
      <node id="1506" label="CBG72692_1"/>
      <node id="1505" label="WP_059081288_1"/>
      <node id="1504" label="AFV25482_1"/>
      <node id="1503" label="GAQ63669_1"/>
      <node id="1502" label="WP_020115555_1"/>
      <node id="1501" label="AFV25483_1"/>
      <node id="1500" label="WP_048819674_1"/>
      <node id="1499" label="WP_100243842_1"/>
      <node id="1498" label="WP_043668521_2"/>
      <node id="1497" label="WP_053775823_2"/>
      <node id="1496" label="OUE24647_2"/>
      <node id="1495" label="WP_104343881_2"/>
      <node id="1494" label="WP_086515725_2"/>
      <node id="1493" label="WP_119402500_1"/>
      <node id="1492" label="WP_087197904_2"/>
      <node id="1491" label="AWF97203_2"/>
      <node id="1490" label="OUE10317_2"/>
      <node id="1489" label="WP_086517141_2"/>
      <node id="1488" label="KZC95159_2"/>
      <node id="1487" label="WP_108249502_1"/>
      <node id="1486" label="PYG35723_1"/>
      <node id="1485" label="WP_093583210_2"/>
      <node id="1484" label="WP_073419543_1"/>
      <node id="1483" label="SHF79230_1"/>
      <node id="1482" label="WP_075012634_2"/>
      <node id="1481" label="SFO01480_2"/>
      <node id="1480" label="PYG35723_3"/>
      <node id="1479" label="WP_110909804_1"/>
      <node id="1478" label="WP_089404560_1"/>
      <node id="1477" label="WP_076159164_1"/>
      <node id="1476" label="SFO01480_3"/>
      <node id="1475" label="WP_110909804_3"/>
      <node id="1474" label="WP_066366076_3"/>
      <node id="1473" label="WP_049570352_4"/>
      <node id="1472" label="WP_083744315_1"/>
      <node id="1471" label="WP_111700764_2"/>
      <node id="1470" label="WP_111167565_4"/>
      <node id="1469" label="WP_081903334_1"/>
      <node id="1468" label="WP_114029832_3"/>
      <node id="1467" label="WP_084316863_1"/>
      <node id="1466" label="SIR58548_2"/>
      <node id="1465" label="WP_061300623_3"/>
      <node id="1464" label="WP_113985589_3"/>
      <node id="1463" label="WP_015622289_3"/>
      <node id="1462" label="WP_091216389_2"/>
      <node id="1461" label="SDN42488_1"/>
      <node id="1460" label="ADB73782_1"/>
      <node id="1459" label="WP_113781263_1"/>
      <node id="1458" label="WP_091374161_1"/>
      <node id="1457" label="SDL97273_2"/>
      <node id="1456" label="WP_091159224_3"/>
      <node id="1455" label="WP_089304860_1"/>
      <node id="1454" label="WP_041241887_1"/>
      <node id="1453" label="SDY68794_3"/>
      <node id="1452" label="WP_091448332_1"/>
      <node id="1451" label="ODR23958_1"/>
      <node id="1450" label="RUP01435_1"/>
      <node id="1449" label="ORC04413_1"/>
      <node id="1448" label="WP_133437797_2"/>
      <node id="1447" label="WP_075510821_1"/>
      <node id="1446" label="WP_065164254_2"/>
      <node id="1445" label="WP_065136618_1"/>
      <node id="1444" label="WP_122442751_1"/>
      <node id="1443" label="WP_055578070_1"/>
      <node id="1442" label="WP_083271029_1"/>
      <node id="1441" label="WP_036403339_1"/>
      <node id="1440" label="WP_054468484_3"/>
      <node id="1439" label="WP_048589183_2"/>
      <node id="1438" label="WP_038620030_2"/>
      <node id="1437" label="AKP09252_2"/>
      <node id="1436" label="WP_087454414_2"/>
      <node id="1435" label="AER69640_1"/>
      <node id="1434" label="AKS13949_1"/>
      <node id="1433" label="AIG09585_2"/>
      <node id="1432" label="WP_046096646_2"/>
      <node id="1431" label="ESU58068_2"/>
      <node id="1430" label="WP_043014356_2"/>
      <node id="1429" label="WP_111035529_1"/>
      <node id="1428" label="WP_086575168_3"/>
      <node id="1427" label="OEV01037_1"/>
      <node id="1426" label="WP_027760735_1"/>
      <node id="1425" label="WP_114021280_1"/>
      <node id="1424" label="WP_099881056_1"/>
      <node id="1423" label="WP_111166051_7"/>
      <node id="1422" label="WP_079171959_1"/>
      <node id="1421" label="WP_084211656_2"/>
      <node id="1420" label="WP_114018158_1"/>
      <node id="1419" label="WP_113979657_4"/>
      <node id="1418" label="WP_080042116_1"/>
      <node id="1417" label="WP_012891705_1"/>
      <node id="1416" label="WP_111170305_1"/>
      <node id="1415" label="SEG99236_2"/>
      <node id="1414" label="WP_084772427_3"/>
      <node id="1413" label="WP_113984581_2"/>
      <node id="1412" label="WP_090941614_2"/>
      <node id="1411" label="WP_103960548_2"/>
      <node id="1410" label="WP_134033092_1"/>
      <node id="1409" label="SPL97283_1"/>
      <node id="1408" label="SBO93312_1"/>
      <node id="1407" label="WP_123603612_2"/>
      <node id="1406" label="WP_114032054_1"/>
      <node id="1405" label="WP_030633187_1"/>
      <node id="1404" label="WP_006347379_1"/>
      <node id="1403" label="WP_100806338_7"/>
      <node id="1402" label="WP_124286732_7"/>
      <node id="1401" label="WP_023554016_3"/>
      <node id="1400" label="WP_059190156_4"/>
      <node id="1399" label="WP_100806338_6"/>
      <node id="1398" label="WP_017589866_3"/>
      <node id="1397" label="WP_092556553_3"/>
      <node id="1396" label="AXG59058_2"/>
      <node id="1395" label="WP_100302786_3"/>
      <node id="1394" label="WP_078564093_3"/>
      <node id="1393" label="WP_052770273_2"/>
      <node id="1392" label="RZU94771_3"/>
      <node id="1391" label="WP_131561563_1"/>
      <node id="1390" label="WP_078572841_3"/>
      <node id="1389" label="PJJ39560_3"/>
      <node id="1388" label="ANS70161_2"/>
      <node id="1387" label="AKH86621_2"/>
      <node id="1386" label="WP_075012634_1"/>
      <node id="1385" label="WP_091365795_1"/>
      <node id="1384" label="WP_089404560_2"/>
      <node id="1383" label="SDC53518_1"/>
      <node id="1382" label="WP_110909804_2"/>
      <node id="1381" label="WP_093583210_1"/>
      <node id="1380" label="PYG35723_2"/>
      <node id="1379" label="SFO01480_1"/>
      <node id="1378" label="WP_106275543_1"/>
      <node id="1377" label="WP_091114658_1"/>
      <node id="1376" label="WP_131103335_5"/>
      <node id="1375" label="WP_101559196_2"/>
      <node id="1374" label="WP_119835460_2"/>
      <node id="1373" label="WP_120205519_2"/>
      <node id="1372" label="WP_046468711_3"/>
      <node id="1371" label="WP_017608824_2"/>
      <node id="1370" label="WP_083296694_1"/>
      <node id="1369" label="WP_017559667_1"/>
      <node id="1368" label="OFK71393_2"/>
      <node id="1367" label="WP_017559667_2"/>
      <node id="1366" label="WP_132172132_1"/>
      <node id="1365" label="WP_117404578_1"/>
      <node id="1364" label="WP_092533827_2"/>
      <node id="1363" label="WP_061294147_1"/>
      <node id="1362" label="WP_129800352_1"/>
      <node id="1361" label="WP_113979595_1"/>
      <node id="1360" label="WP_075941351_1"/>
      <node id="1359" label="WP_132339706_4"/>
      <node id="1358" label="ALE82507_2"/>
      <node id="1357" label="WP_018657395_2"/>
      <node id="1356" label="WP_113985589_1"/>
      <node id="1355" label="WP_061300623_1"/>
      <node id="1354" label="WP_111167565_1"/>
      <node id="1353" label="WP_015622289_1"/>
      <node id="1352" label="WP_049570352_3"/>
      <node id="1351" label="WP_062349267_1"/>
      <node id="1350" label="WP_066366076_1"/>
      <node id="1349" label="SIR58548_1"/>
      <node id="1348" label="WP_114029832_1"/>
      <node id="1347" label="WP_062440803_1"/>
      <node id="1346" label="WP_063274437_1"/>
      <node id="1345" label="WP_088799362_2"/>
      <node id="1344" label="WP_053747924_1"/>
      <node id="1343" label="WP_111415595_3"/>
      <node id="1342" label="WP_088799351_1"/>
      <node id="1341" label="WP_030462613_1"/>
      <node id="1340" label="WP_030040480_2"/>
      <node id="1339" label="WP_067603246_2"/>
      <node id="1338" label="WP_037881970_2"/>
      <node id="1337" label="WP_004018421_2"/>
      <node id="1336" label="WP_051458184_1"/>
      <node id="1335" label="KIE24863_5"/>
      <node id="1334" label="AKJ13608_4"/>
      <node id="1333" label="WP_055553439_2"/>
      <node id="1332" label="WP_063832391_1"/>
      <node id="1331" label="WP_063758854_2"/>
      <node id="1330" label="WP_055482843_1"/>
      <node id="1329" label="WP_037862255_3"/>
      <node id="1328" label="OUE24647_1"/>
      <node id="1327" label="AWF97203_1"/>
      <node id="1326" label="WP_053775823_1"/>
      <node id="1325" label="OUE10317_1"/>
      <node id="1324" label="WP_086517141_1"/>
      <node id="1323" label="WP_043668521_1"/>
      <node id="1322" label="WP_104343881_1"/>
      <node id="1321" label="WP_086515725_1"/>
      <node id="1320" label="KZC95159_1"/>
      <node id="1319" label="WP_064110435_1"/>
      <node id="1318" label="WP_093766414_2"/>
      <node id="1317" label="WP_085014622_7"/>
      <node id="1316" label="WP_093849541_1"/>
      <node id="1315" label="WP_027743449_2"/>
      <node id="1314" label="WP_035849420_2"/>
      <node id="1313" label="WP_093655900_2"/>
      <node id="1312" label="WP_085014620_5"/>
      <node id="1311" label="WP_090039557_1"/>
      <node id="1310" label="WP_035849420_3"/>
      <node id="1309" label="WP_090039557_4"/>
      <node id="1308" label="WP_064110435_4"/>
      <node id="1307" label="WP_093849541_6"/>
      <node id="1306" label="WP_093766414_5"/>
      <node id="1305" label="WP_093655900_6"/>
      <node id="1304" label="WP_027743449_5"/>
      <node id="1303" label="WP_085014620_2"/>
      <node id="1302" label="WP_085014622_2"/>
      <node id="1301" label="WP_083115648_1"/>
      <node id="1300" label="OOK83994_1"/>
      <node id="1299" label="WP_083102943_1"/>
      <node id="1298" label="WP_122530149_1"/>
      <node id="1297" label="WP_085671318_1"/>
      <node id="1296" label="WP_085105271_1"/>
      <node id="1295" label="EUA05503_1"/>
      <node id="1294" label="WP_085252934_1"/>
      <node id="1293" label="WP_063471945_1"/>
      <node id="1292" label="WP_030040480_4"/>
      <node id="1291" label="WP_111415595_4"/>
      <node id="1290" label="WP_053747924_3"/>
      <node id="1289" label="WP_067603246_1"/>
      <node id="1288" label="WP_088799362_3"/>
      <node id="1287" label="WP_088799362_4"/>
      <node id="1286" label="WP_088799351_2"/>
      <node id="1285" label="WP_037881970_3"/>
      <node id="1284" label="WP_030462613_2"/>
      <node id="1283" label="WP_062703680_1"/>
      <node id="1282" label="WP_078902009_1"/>
      <node id="1281" label="WP_051771079_1"/>
      <node id="1280" label="OKH95170_4"/>
      <node id="1279" label="KOV37396_2"/>
      <node id="1278" label="KJY27974_1"/>
      <node id="1277" label="EIF94124_2"/>
      <node id="1276" label="WP_121006702_1"/>
      <node id="1275" label="WP_073785992_4"/>
      <node id="1274" label="WP_090003614_1"/>
      <node id="1273" label="WP_093590338_1"/>
      <node id="1272" label="WP_090064781_1"/>
      <node id="1271" label="SMC91639_2"/>
      <node id="1270" label="PWK88358_1"/>
      <node id="1269" label="WP_109636347_1"/>
      <node id="1268" label="SER15522_2"/>
      <node id="1267" label="WP_089952439_2"/>
      <node id="1266" label="WP_090047429_4"/>
      <node id="1265" label="WP_052295615_1"/>
      <node id="1264" label="WP_083191919_3"/>
      <node id="1263" label="KOU46944_3"/>
      <node id="1262" label="SDE31545_2"/>
      <node id="1261" label="KOG82578_4"/>
      <node id="1260" label="WP_106731546_1"/>
      <node id="1259" label="WP_055559179_2"/>
      <node id="1258" label="BAG17422_1"/>
      <node id="1257" label="SEC29390_1"/>
      <node id="1256" label="SEQ53933_1"/>
      <node id="1255" label="WP_109280200_1"/>
      <node id="1254" label="WP_052852666_1"/>
      <node id="1253" label="WP_109280137_1"/>
      <node id="1252" label="WP_066215709_1"/>
      <node id="1251" label="WP_089950617_1"/>
      <node id="1250" label="WP_061787443_2"/>
      <node id="1249" label="WP_067284698_1"/>
      <node id="1248" label="WP_084011357_2"/>
      <node id="1247" label="WP_131785730_1"/>
      <node id="1246" label="WP_045877303_2"/>
      <node id="1245" label="WP_035849418_2"/>
      <node id="1244" label="WP_035849420_4"/>
      <node id="1243" label="WP_004004118_1"/>
      <node id="1242" label="WP_131785729_1"/>
      <node id="1241" label="WP_093849541_3"/>
      <node id="1240" label="WP_085014620_3"/>
      <node id="1239" label="WP_090039557_5"/>
      <node id="1238" label="WP_064110435_5"/>
      <node id="1237" label="WP_027743449_3"/>
      <node id="1236" label="WP_093655900_4"/>
      <node id="1235" label="WP_093766414_3"/>
      <node id="1234" label="WP_085014622_4"/>
      <node id="1233" label="WP_123971014_2"/>
      <node id="1232" label="AKJ15899_3"/>
      <node id="1231" label="PKB45316_1"/>
      <node id="1230" label="WP_100886407_1"/>
      <node id="1229" label="RPF24868_2"/>
      <node id="1228" label="WP_053729792_2"/>
      <node id="1227" label="WP_100584684_1"/>
      <node id="1226" label="WP_053729790_2"/>
      <node id="1225" label="WP_088246551_2"/>
      <node id="1224" label="WP_100886407_2"/>
      <node id="1223" label="WP_088261769_1"/>
      <node id="1222" label="WP_053587900_2"/>
      <node id="1221" label="PKB45316_2"/>
      <node id="1220" label="WP_088264775_2"/>
      <node id="1219" label="OMO45941_3"/>
      <node id="1218" label="WP_093886633_1"/>
      <node id="1217" label="WP_081453250_1"/>
      <node id="1216" label="SFI84698_1"/>
      <node id="1215" label="WP_081937495_1"/>
      <node id="1214" label="KLO64220_1"/>
      <node id="1213" label="WP_086572205_1"/>
      <node id="1212" label="ACZ89043_1"/>
      <node id="1211" label="RZU94771_2"/>
      <node id="1210" label="AKH86621_1"/>
      <node id="1209" label="WP_052770273_1"/>
      <node id="1208" label="WP_100302786_2"/>
      <node id="1207" label="PJJ39560_2"/>
      <node id="1206" label="WP_078572841_2"/>
      <node id="1205" label="WP_078564093_2"/>
      <node id="1204" label="WP_030633187_2"/>
      <node id="1203" label="WP_053787331_1"/>
      <node id="1202" label="WP_103491678_3"/>
      <node id="1201" label="WP_125541988_1"/>
      <node id="1200" label="TDU80263_1"/>
      <node id="1199" label="WP_086845754_2"/>
      <node id="1198" label="WP_114055833_1"/>
      <node id="1197" label="WP_088948967_1"/>
      <node id="1196" label="WP_046567642_2"/>
      <node id="1195" label="WP_120728438_1"/>
      <node id="1194" label="WP_088988891_1"/>
      <node id="1193" label="WP_088972034_1"/>
      <node id="1192" label="WP_067306280_1"/>
      <node id="1191" label="WP_089157775_2"/>
      <node id="1190" label="WP_030432198_1"/>
      <node id="1189" label="WP_092779820_1"/>
      <node id="1188" label="WP_126898321_2"/>
      <node id="1187" label="WP_125813086_2"/>
      <node id="1186" label="WP_121394015_1"/>
      <node id="1185" label="WP_086824496_1"/>
      <node id="1184" label="SEC38602_2"/>
      <node id="1183" label="WP_090014707_2"/>
      <node id="1182" label="WP_107442966_5"/>
      <node id="1181" label="SDN00667_2"/>
      <node id="1180" label="WP_031012255_1"/>
      <node id="1179" label="WP_078909294_7"/>
      <node id="1178" label="WP_057576508_3"/>
      <node id="1177" label="WP_015618321_1"/>
      <node id="1176" label="WP_104263679_2"/>
      <node id="1175" label="WP_067284698_2"/>
      <node id="1174" label="WP_045877303_4"/>
      <node id="1173" label="WP_084011357_4"/>
      <node id="1172" label="WP_035849418_3"/>
      <node id="1171" label="WP_035849420_5"/>
      <node id="1170" label="WP_004004118_2"/>
      <node id="1169" label="WP_018550650_1"/>
      <node id="1168" label="WP_084415984_2"/>
      <node id="1167" label="WP_071377378_1"/>
      <node id="1166" label="WP_115914639_1"/>
      <node id="1165" label="WP_054222272_1"/>
      <node id="1164" label="WP_051386825_1"/>
      <node id="1163" label="WP_103517755_2"/>
      <node id="1162" label="WP_124003633_2"/>
      <node id="1161" label="RPE52214_2"/>
      <node id="1160" label="WP_091272827_3"/>
      <node id="1159" label="WP_131626375_3"/>
      <node id="1158" label="WP_091272829_3"/>
      <node id="1157" label="WP_124003201_2"/>
      <node id="1156" label="WP_076824657_2"/>
      <node id="1155" label="WP_013865882_1"/>
      <node id="1154" label="BAK38069_1"/>
      <node id="1153" label="WP_117228579_1"/>
      <node id="1152" label="WP_013865884_1"/>
      <node id="1151" label="WP_117228580_1"/>
      <node id="1150" label="WP_117228578_1"/>
      <node id="1149" label="WP_049804670_1"/>
      <node id="1148" label="WP_117228578_2"/>
      <node id="1147" label="WP_109186559_2"/>
      <node id="1146" label="WP_035849420_6"/>
      <node id="1145" label="WP_117228579_2"/>
      <node id="1144" label="WP_085014622_5"/>
      <node id="1143" label="WP_027743449_6"/>
      <node id="1142" label="WP_091094839_9004"/>
      <node id="1141" label="WP_061921822_9003"/>
      <node id="1140" label="AEM00621_9001"/>
      <node id="1139" label="WP_120688998_9002"/>
      <node id="1138" label="WP_127935985_5"/>
      <node id="1137" label="WP_026413549_9004"/>
      <node id="1136" label="WP_091094891_1"/>
      <node id="1135" label="WP_014176997_1"/>
      <node id="1134" label="WP_131761782_2"/>
      <node id="1133" label="SCL44965_2"/>
      <node id="1132" label="SCL44965_3"/>
      <node id="1131" label="WP_091030566_2"/>
      <node id="1130" label="ODR23958_2"/>
      <node id="1129" label="WP_085249702_2"/>
      <node id="1128" label="RUP01435_2"/>
      <node id="1127" label="WP_083271029_2"/>
      <node id="1126" label="WP_055578070_3"/>
      <node id="1125" label="WP_133437797_1"/>
      <node id="1124" label="WP_091067169_1"/>
      <node id="1123" label="WP_091553165_1"/>
      <node id="1122" label="SDG90099_1"/>
      <node id="1121" label="SCX58064_1"/>
      <node id="1120" label="WP_092807119_1"/>
      <node id="1119" label="WP_091247291_1"/>
      <node id="1118" label="WP_132388266_1"/>
      <node id="1117" label="WP_132186408_1"/>
      <node id="1116" label="WP_132268317_1"/>
      <node id="1115" label="WP_132268319_1"/>
      <node id="1114" label="WP_132186409_1"/>
      <node id="1113" label="WP_132388264_1"/>
      <node id="1112" label="WP_093766414_1"/>
      <node id="1111" label="WP_085014622_3"/>
      <node id="1110" label="WP_124799873_1"/>
      <node id="1109" label="WP_027743449_1"/>
      <node id="1108" label="WP_093849541_2"/>
      <node id="1107" label="WP_093655900_3"/>
      <node id="1106" label="WP_084692311_3"/>
      <node id="1105" label="WP_084692314_1"/>
      <node id="1104" label="WP_018962008_2"/>
      <node id="1103" label="WP_018962008_3"/>
      <node id="1102" label="WP_028567914_3"/>
      <node id="1101" label="WP_084436210_1"/>
      <node id="1100" label="WP_051709136_1"/>
      <node id="1099" label="WP_127935985_6"/>
      <node id="1098" label="WP_120688998_1"/>
      <node id="1097" label="WP_093656413_1"/>
      <node id="1096" label="WP_091094839_1"/>
      <node id="1095" label="WP_119286192_1"/>
      <node id="1094" label="WP_090799956_1"/>
      <node id="1093" label="WP_089254486_1"/>
      <node id="1092" label="WP_073700824_1"/>
      <node id="1091" label="WP_030877129_1"/>
      <node id="1090" label="WP_017557210_1"/>
      <node id="1089" label="WP_071967420_1"/>
      <node id="1088" label="WP_050507047_1"/>
      <node id="1087" label="WP_099938361_1"/>
      <node id="1086" label="WP_050514186_1"/>
      <node id="1085" label="WP_128433746_1"/>
      <node id="1084" label="PIF99032_1"/>
      <node id="1083" label="WP_078966254_1"/>
      <node id="1082" label="VEG28624_3"/>
      <node id="1081" label="WP_126382680_3"/>
      <node id="1080" label="WP_093640559_4"/>
      <node id="1079" label="WP_055699111_7"/>
      <node id="1078" label="WP_056678071_6"/>
      <node id="1077" label="WP_063469930_2"/>
      <node id="1076" label="OOK66964_2"/>
      <node id="1075" label="WP_023370892_1"/>
      <node id="1074" label="WP_122441228_1"/>
      <node id="1073" label="EUA04475_3"/>
      <node id="1072" label="WP_110666035_1"/>
      <node id="1071" label="WP_107100134_1"/>
      <node id="1070" label="WP_031027146_2"/>
      <node id="1069" label="KPC95547_1"/>
      <node id="1068" label="WP_108724550_2"/>
      <node id="1067" label="EGR94682_2"/>
      <node id="1066" label="ADD99586_1"/>
      <node id="1065" label="WP_075371528_1"/>
      <node id="1064" label="EGR94682_5"/>
      <node id="1063" label="ADD99586_6"/>
      <node id="1062" label="WP_018522479_2"/>
      <node id="1061" label="WP_028441277_2"/>
      <node id="1060" label="WP_101404757_2"/>
      <node id="1059" label="WP_057611617_3"/>
      <node id="1058" label="WP_049563074_2"/>
      <node id="1057" label="WP_104820017_2"/>
      <node id="1056" label="WP_057236399_1"/>
      <node id="1055" label="WP_051778263_1"/>
      <node id="1054" label="WP_104820017_3"/>
      <node id="1053" label="WP_104820017_1"/>
      <node id="1052" label="WP_078841030_2"/>
      <node id="1051" label="OPF84252_2"/>
      <node id="1050" label="OPF84252_4"/>
      <node id="1049" label="WP_078841030_4"/>
      <node id="1048" label="WP_046085362_4"/>
      <node id="1047" label="KQR47999_1"/>
      <node id="1046" label="WP_082508744_1"/>
      <node id="1045" label="WP_075410821_9002"/>
      <node id="1044" label="OLO48687_1"/>
      <node id="1043" label="WP_081384789_1"/>
      <node id="1042" label="AER69640_3"/>
      <node id="1041" label="AKP09252_3"/>
      <node id="1040" label="AIG09585_3"/>
      <node id="1039" label="WP_048589183_3"/>
      <node id="1038" label="AKS13949_2"/>
      <node id="1037" label="WP_089157775_1"/>
      <node id="1036" label="WP_093610459_1"/>
      <node id="1035" label="PWK29583_1"/>
      <node id="1034" label="WP_046567642_1"/>
      <node id="1033" label="WP_089298084_1"/>
      <node id="1032" label="SHF79230_2"/>
      <node id="1031" label="WP_073419543_2"/>
      <node id="1030" label="WP_091365795_2"/>
      <node id="1029" label="WP_089404560_3"/>
      <node id="1028" label="SDC53518_2"/>
      <node id="1027" label="WP_100302786_1"/>
      <node id="1026" label="RZU94771_1"/>
      <node id="1025" label="WP_078564093_1"/>
      <node id="1024" label="WP_078572841_1"/>
      <node id="1023" label="PJJ39560_1"/>
      <node id="1022" label="PWF27333_3"/>
      <node id="1021" label="WP_081323045_3"/>
      <node id="1020" label="KTR94659_3"/>
      <node id="1019" label="WP_133246044_3"/>
      <node id="1018" label="WP_109092842_1"/>
      <node id="1017" label="WP_124284474_1"/>
      <node id="1016" label="WP_082248115_1"/>
      <node id="1015" label="WP_132339706_2"/>
      <node id="1014" label="WP_080684945_2"/>
      <node id="1013" label="OQM68597_1"/>
      <node id="1012" label="WP_091289566_2"/>
      <node id="1011" label="WP_091289566_3"/>
      <node id="1010" label="WP_091674323_1"/>
      <node id="1009" label="SFB39971_1"/>
      <node id="1008" label="WP_091289566_1"/>
      <node id="1007" label="WP_082057091_1"/>
      <node id="1006" label="SEC29390_3"/>
      <node id="1005" label="AJT41785_1"/>
      <node id="1004" label="SEB29931_2"/>
      <node id="1003" label="WP_026174640_2"/>
      <node id="1002" label="WP_132047282_3"/>
      <node id="1001" label="ALE82507_1"/>
      <node id="1000" label="ODU05661_1"/>
      <node id="999" label="WP_084211656_1"/>
      <node id="998" label="WP_091159224_1"/>
      <node id="997" label="SDL97273_1"/>
      <node id="996" label="WP_091216389_1"/>
      <node id="995" label="SDY68794_1"/>
      <node id="994" label="KOG82578_3"/>
      <node id="993" label="WP_083191919_5"/>
      <node id="992" label="KOU46944_2"/>
      <node id="991" label="SDE31545_5"/>
      <node id="990" label="SDE51953_2"/>
      <node id="989" label="SDL22458_3"/>
      <node id="988" label="WP_091051455_3"/>
      <node id="987" label="WP_091040567_3"/>
      <node id="986" label="WP_083667099_1"/>
      <node id="985" label="WP_083679341_1"/>
      <node id="984" label="OMC41183_1"/>
      <node id="983" label="OMC50887_1"/>
      <node id="982" label="WP_084093827_1"/>
      <node id="981" label="WP_116200011_1"/>
      <node id="980" label="WP_067592598_1"/>
      <node id="979" label="KDN17331_1"/>
      <node id="978" label="WP_135231520_2"/>
      <node id="977" label="WP_132175704_2"/>
      <node id="976" label="WP_131965720_2"/>
      <node id="975" label="WP_107657165_1"/>
      <node id="974" label="WP_120571833_1"/>
      <node id="973" label="WP_123601960_2"/>
      <node id="972" label="WP_123601959_2"/>
      <node id="971" label="WP_120571834_1"/>
      <node id="970" label="WP_086513413_3"/>
      <node id="969" label="OUE27580_2"/>
      <node id="968" label="WP_086513414_3"/>
      <node id="967" label="OUE27579_2"/>
      <node id="966" label="WP_092807119_2"/>
      <node id="965" label="WP_091067169_2"/>
      <node id="964" label="SCX58064_2"/>
      <node id="963" label="WP_091553165_2"/>
      <node id="962" label="WP_078909294_8"/>
      <node id="961" label="WP_057576508_4"/>
      <node id="960" label="WP_107442966_6"/>
      <node id="959" label="WP_031012255_4"/>
      <node id="958" label="WP_027737671_2"/>
      <node id="957" label="AXK36692_1"/>
      <node id="956" label="WP_027737668_2"/>
      <node id="955" label="AXK36690_2"/>
      <node id="954" label="WP_132388266_3"/>
      <node id="953" label="WP_132186409_2"/>
      <node id="952" label="WP_132186408_2"/>
      <node id="951" label="WP_132388264_3"/>
      <node id="950" label="WP_132172132_2"/>
      <node id="949" label="WP_121801511_6"/>
      <node id="948" label="WP_018657395_3"/>
      <node id="947" label="WP_091460541_1"/>
      <node id="946" label="WP_028427539_1"/>
      <node id="945" label="WP_078515914_1"/>
      <node id="944" label="WP_017568553_1"/>
      <node id="943" label="WP_017568552_1"/>
      <node id="942" label="WP_083982727_4"/>
      <node id="941" label="WP_083982727_3"/>
      <node id="940" label="WP_082008308_3"/>
      <node id="939" label="KHK96352_4"/>
      <node id="938" label="WP_132268319_3"/>
      <node id="937" label="WP_132388266_4"/>
      <node id="936" label="WP_132388264_4"/>
      <node id="935" label="WP_132268317_3"/>
      <node id="934" label="WP_067972339_2"/>
      <node id="933" label="WP_111166051_2"/>
      <node id="932" label="WP_091094891_2"/>
      <node id="931" label="SCL44965_4"/>
      <node id="930" label="WP_104181080_4"/>
      <node id="929" label="SDL22458_1"/>
      <node id="928" label="WP_105032337_4"/>
      <node id="927" label="WP_091051455_1"/>
      <node id="926" label="KOU46944_1"/>
      <node id="925" label="SDE31545_1"/>
      <node id="924" label="WP_083191919_1"/>
      <node id="923" label="KOG82578_1"/>
      <node id="922" label="WP_131965720_1"/>
      <node id="921" label="WP_132175704_1"/>
      <node id="920" label="WP_135231520_1"/>
      <node id="919" label="WP_131883639_1"/>
      <node id="918" label="WP_085014620_1"/>
      <node id="917" label="WP_093849541_4"/>
      <node id="916" label="WP_085014622_1"/>
      <node id="915" label="WP_093655900_1"/>
      <node id="914" label="WP_081655210_1"/>
      <node id="913" label="WP_034274384_1"/>
      <node id="912" label="WP_029068734_1"/>
      <node id="911" label="WP_033306993_1"/>
      <node id="910" label="WP_125813086_6"/>
      <node id="909" label="WP_084902797_1"/>
      <node id="908" label="WP_015663091_5"/>
      <node id="907" label="WP_089156471_1"/>
      <node id="906" label="WP_121185218_2"/>
      <node id="905" label="WP_017568553_2"/>
      <node id="904" label="WP_121185217_1"/>
      <node id="903" label="WP_017568552_2"/>
      <node id="902" label="WP_088991224_1"/>
      <node id="901" label="SCE72260_1"/>
      <node id="900" label="SCE72235_1"/>
      <node id="899" label="WP_088986452_1"/>
      <node id="898" label="WP_062440803_4"/>
      <node id="897" label="WP_066366076_4"/>
      <node id="896" label="WP_062349267_3"/>
      <node id="895" label="WP_061300623_4"/>
      <node id="894" label="WP_089404560_4"/>
      <node id="893" label="SFO01480_4"/>
      <node id="892" label="WP_093583210_4"/>
      <node id="891" label="WP_075012634_3"/>
      <node id="890" label="WP_049570352_6"/>
      <node id="889" label="WP_111167565_5"/>
      <node id="888" label="WP_113985589_4"/>
      <node id="887" label="SIR58548_3"/>
      <node id="886" label="WP_076824657_3"/>
      <node id="885" label="WP_091272829_2"/>
      <node id="884" label="WP_091272827_2"/>
      <node id="883" label="WP_054567598_3"/>
      <node id="882" label="AJT41785_2"/>
      <node id="881" label="WP_131626375_2"/>
      <node id="880" label="WP_082057091_2"/>
      <node id="879" label="WP_070739770_3"/>
      <node id="878" label="WP_070739770_4"/>
      <node id="877" label="WP_070739770_2"/>
      <node id="876" label="SBN62121_2"/>
      <node id="875" label="WP_110911190_2"/>
      <node id="874" label="WP_111209344_1"/>
      <node id="873" label="WP_103341360_2"/>
      <node id="872" label="ANN17130_2"/>
      <node id="871" label="WP_113979657_5"/>
      <node id="870" label="WP_071042994_1"/>
      <node id="869" label="WP_104167780_1"/>
      <node id="868" label="WP_071042996_1"/>
      <node id="867" label="EFL12569_3"/>
      <node id="866" label="WP_014690715_1"/>
      <node id="865" label="WP_078561279_4"/>
      <node id="864" label="AFK17249_2"/>
      <node id="863" label="WP_075142776_2"/>
      <node id="862" label="WP_061409829_2"/>
      <node id="861" label="WP_116200011_2"/>
      <node id="860" label="WP_101557149_1"/>
      <node id="859" label="WP_101557151_1"/>
      <node id="858" label="WP_094009173_4"/>
      <node id="857" label="WP_123074529_4"/>
      <node id="856" label="WP_057608322_3"/>
      <node id="855" label="WP_078564093_4"/>
      <node id="854" label="WP_100302786_4"/>
      <node id="853" label="PJJ39560_4"/>
      <node id="852" label="WP_105032337_1"/>
      <node id="851" label="WP_098514311_1"/>
      <node id="850" label="WP_104181080_1"/>
      <node id="849" label="WP_126890470_1"/>
      <node id="848" label="WP_100806338_2"/>
      <node id="847" label="WP_006143940_1"/>
      <node id="846" label="WP_037862255_2"/>
      <node id="845" label="WP_055553439_1"/>
      <node id="844" label="AKJ13608_5"/>
      <node id="843" label="WP_089952439_1"/>
      <node id="842" label="SMC91639_1"/>
      <node id="841" label="SER15522_1"/>
      <node id="840" label="WP_078971081_3"/>
      <node id="839" label="KPC62607_3"/>
      <node id="838" label="WP_067972339_5"/>
      <node id="837" label="KZM72684_1"/>
      <node id="836" label="WP_082871442_1"/>
      <node id="835" label="WP_030877129_2"/>
      <node id="834" label="WP_020787304_1"/>
      <node id="833" label="CDM77002_2"/>
      <node id="832" label="AGC62644_1"/>
      <node id="831" label="WP_079177123_4"/>
      <node id="830" label="WP_023554016_1"/>
      <node id="829" label="OIJ88146_4"/>
      <node id="828" label="WP_116209352_1"/>
      <node id="827" label="WP_124271723_1"/>
      <node id="826" label="RPK69291_1"/>
      <node id="825" label="WP_059193363_2"/>
      <node id="824" label="WP_107120384_2"/>
      <node id="823" label="KUN25245_2"/>
      <node id="822" label="WP_030269598_1"/>
      <node id="821" label="WP_128378882_1"/>
      <node id="820" label="WP_057232473_1"/>
      <node id="819" label="OFL66352_2"/>
      <node id="818" label="WP_083304061_2"/>
      <node id="817" label="WP_083318853_2"/>
      <node id="816" label="WP_125499925_1"/>
      <node id="815" label="WP_111506795_3"/>
      <node id="814" label="WP_051816122_1"/>
      <node id="813" label="WP_121148667_1"/>
      <node id="812" label="WP_058623611_1"/>
      <node id="811" label="RKT36058_2"/>
      <node id="810" label="WP_107120384_4"/>
      <node id="809" label="WP_059193363_4"/>
      <node id="808" label="KUN25245_4"/>
      <node id="807" label="SFO39709_2"/>
      <node id="806" label="WP_101786715_1"/>
      <node id="805" label="WP_083597719_2"/>
      <node id="804" label="ANS70161_1"/>
      <node id="803" label="WP_079164984_1"/>
      <node id="802" label="AXG59058_1"/>
      <node id="801" label="SEB29931_3"/>
      <node id="800" label="WP_082724316_1"/>
      <node id="799" label="WP_066217216_1"/>
      <node id="798" label="WP_082248115_2"/>
      <node id="797" label="OKL53160_2"/>
      <node id="796" label="WP_083603298_2"/>
      <node id="795" label="SDL74859_1"/>
      <node id="794" label="WP_090009591_1"/>
      <node id="793" label="SDG32337_1"/>
      <node id="792" label="AFJ68075_1"/>
      <node id="791" label="WP_079051299_1"/>
      <node id="790" label="KUM76187_1"/>
      <node id="789" label="WP_087454414_3"/>
      <node id="788" label="WP_046096646_3"/>
      <node id="787" label="ESU58068_3"/>
      <node id="786" label="WP_007495061_1"/>
      <node id="785" label="WP_121191582_1"/>
      <node id="784" label="RKS80725_1"/>
      <node id="783" label="WP_116150435_1"/>
      <node id="782" label="WP_044386624_1"/>
      <node id="781" label="WP_130329265_1"/>
      <node id="780" label="WP_081937495_2"/>
      <node id="779" label="ACZ89043_3"/>
      <node id="778" label="SFI84698_2"/>
      <node id="777" label="SCX58064_3"/>
      <node id="776" label="WP_091247291_2"/>
      <node id="775" label="WP_092807119_3"/>
      <node id="774" label="WP_135971800_3"/>
      <node id="773" label="WP_092888237_3"/>
      <node id="772" label="WP_092888237_1"/>
      <node id="771" label="WP_061300721_1"/>
      <node id="770" label="WP_061300720_1"/>
      <node id="769" label="WP_061300719_1"/>
      <node id="768" label="WP_091614694_9002"/>
      <node id="767" label="WP_074475319_9003"/>
      <node id="766" label="WP_110565442_9001"/>
      <node id="765" label="WP_043809367_2"/>
      <node id="764" label="WP_007536321_2"/>
      <node id="763" label="EME16460_2"/>
      <node id="762" label="OMO45941_2"/>
      <node id="761" label="WP_088246551_3"/>
      <node id="760" label="WP_070795263_3"/>
      <node id="759" label="WP_053775070_2"/>
      <node id="758" label="WP_129176857_3"/>
      <node id="757" label="WP_130490932_1"/>
      <node id="756" label="SFK92414_3"/>
      <node id="755" label="WP_093601012_1"/>
      <node id="754" label="WP_125792333_4"/>
      <node id="753" label="KIE24863_1"/>
      <node id="752" label="AKJ13608_3"/>
      <node id="751" label="WP_052318929_1"/>
      <node id="750" label="CAM04239_3"/>
      <node id="749" label="WP_009951067_2"/>
      <node id="748" label="WP_132619812_2"/>
      <node id="747" label="SDH11838_2"/>
      <node id="746" label="WP_093170943_1"/>
      <node id="745" label="WP_093170892_2"/>
      <node id="744" label="WP_082822395_1"/>
      <node id="743" label="WP_091040567_2"/>
      <node id="742" label="SDE51953_1"/>
      <node id="741" label="WP_079037558_6"/>
      <node id="740" label="CUM40551_5"/>
      <node id="739" label="WP_125547276_1"/>
      <node id="738" label="WP_083296959_2"/>
      <node id="737" label="WP_082931047_2"/>
      <node id="736" label="EWM64891_2"/>
      <node id="735" label="WP_082128669_2"/>
      <node id="734" label="KLO64220_4"/>
      <node id="733" label="WP_131103335_2"/>
      <node id="732" label="WP_093170943_3"/>
      <node id="731" label="WP_093170892_5"/>
      <node id="730" label="SDH11838_5"/>
      <node id="729" label="KZM72684_2"/>
      <node id="728" label="WP_082871442_2"/>
      <node id="727" label="WP_098695120_3"/>
      <node id="726" label="WP_134664144_7"/>
      <node id="725" label="WP_134664144_5"/>
      <node id="724" label="WP_099279259_5"/>
      <node id="723" label="EWM64891_3"/>
      <node id="722" label="WP_082931047_3"/>
      <node id="721" label="WP_083296959_3"/>
      <node id="720" label="WP_083296959_1"/>
      <node id="719" label="WP_082931047_1"/>
      <node id="718" label="EWM64891_1"/>
      <node id="717" label="WP_082163142_1"/>
      <node id="716" label="EFF80328_1"/>
      <node id="715" label="WP_127571148_1"/>
      <node id="714" label="KLL12571_3"/>
      <node id="713" label="WP_076843254_2"/>
      <node id="712" label="WP_076843253_2"/>
      <node id="711" label="WP_072028150_2"/>
      <node id="710" label="ONF71727_5"/>
      <node id="709" label="WP_083715654_5"/>
      <node id="708" label="WP_086828879_1"/>
      <node id="707" label="SDM16976_1"/>
      <node id="706" label="WP_081900771_1"/>
      <node id="705" label="WP_059193363_3"/>
      <node id="704" label="KUN25245_3"/>
      <node id="703" label="WP_107120384_3"/>
      <node id="702" label="WP_076804070_2"/>
      <node id="701" label="WP_108913844_2"/>
      <node id="700" label="WP_043591397_2"/>
      <node id="699" label="PKV33869_6"/>
      <node id="698" label="RED74809_6"/>
      <node id="697" label="WP_116154877_6"/>
      <node id="696" label="WP_091040567_5"/>
      <node id="695" label="SDE51953_4"/>
      <node id="694" label="WP_069774196_3"/>
      <node id="693" label="WP_053652832_3"/>
      <node id="692" label="SCG59471_1"/>
      <node id="691" label="REF98980_2"/>
      <node id="690" label="WP_106674009_1"/>
      <node id="689" label="WP_125314889_1"/>
      <node id="688" label="WP_051338384_1"/>
      <node id="687" label="WP_119105432_2"/>
      <node id="686" label="WP_054213495_3"/>
      <node id="685" label="KPI20077_3"/>
      <node id="684" label="WP_030701973_2"/>
      <node id="683" label="SDL97273_3"/>
      <node id="682" label="WP_091216389_3"/>
      <node id="681" label="WP_075831737_1"/>
      <node id="680" label="WP_124566915_1"/>
      <node id="679" label="WP_080909324_1"/>
      <node id="678" label="WP_080684945_1"/>
      <node id="677" label="OQM68597_3"/>
      <node id="676" label="WP_082248115_3"/>
      <node id="675" label="WP_100861846_2"/>
      <node id="674" label="WP_051777853_1"/>
      <node id="673" label="WP_131965734_2"/>
      <node id="672" label="WP_131965735_3"/>
      <node id="671" label="WP_017559667_3"/>
      <node id="670" label="ROS45991_2"/>
      <node id="669" label="RUP01435_5"/>
      <node id="668" label="WP_055578070_5"/>
      <node id="667" label="WP_093544729_1"/>
      <node id="666" label="SCD31130_1"/>
      <node id="665" label="WP_064833209_2"/>
      <node id="664" label="OBA55656_3"/>
      <node id="663" label="WP_073876556_3"/>
      <node id="662" label="RLV71217_2"/>
      <node id="661" label="SMF78969_1"/>
      <node id="660" label="WP_085213387_1"/>
      <node id="659" label="SGI74060_1"/>
      <node id="658" label="WP_079180155_1"/>
      <node id="657" label="KJK44488_5"/>
      <node id="656" label="WP_082115066_4"/>
      <node id="655" label="EMF02011_4"/>
      <node id="654" label="WP_040887728_4"/>
      <node id="653" label="WP_034253534_4"/>
      <node id="652" label="EGQ75425_4"/>
      <node id="651" label="WP_116708219_1"/>
      <node id="650" label="WP_133828511_1"/>
      <node id="649" label="SEG99236_1"/>
      <node id="648" label="WP_103960548_1"/>
      <node id="647" label="WP_035861760_1"/>
      <node id="646" label="EXG81129_1"/>
      <node id="645" label="WP_048316860_2"/>
      <node id="644" label="WP_048317341_2"/>
      <node id="643" label="WP_079182634_3"/>
      <node id="642" label="OKI46856_3"/>
      <node id="641" label="WP_084692314_4"/>
      <node id="640" label="WP_084692311_6"/>
      <node id="639" label="CCB71037_1"/>
      <node id="638" label="WP_078590495_1"/>
      <node id="637" label="WP_131965734_3"/>
      <node id="636" label="WP_131965735_4"/>
      <node id="635" label="WP_096168585_3"/>
      <node id="634" label="WP_135448567_2"/>
      <node id="633" label="WP_017568553_3"/>
      <node id="632" label="WP_017568552_3"/>
      <node id="631" label="WP_130875440_1"/>
      <node id="630" label="WP_061787443_4"/>
      <node id="629" label="PDQ36469_2"/>
      <node id="628" label="WP_125614105_1"/>
      <node id="627" label="WP_104181080_2"/>
      <node id="626" label="WP_105032337_2"/>
      <node id="625" label="PJJ46026_2"/>
      <node id="624" label="WP_100302197_2"/>
      <node id="623" label="RED74809_7"/>
      <node id="622" label="WP_116154877_7"/>
      <node id="621" label="OJV24806_3"/>
      <node id="620" label="OJV24808_3"/>
      <node id="619" label="WP_132170147_1"/>
      <node id="618" label="WP_132170149_1"/>
      <node id="617" label="WP_081453250_3"/>
      <node id="616" label="ACZ89043_4"/>
      <node id="615" label="RKT76768_2"/>
      <node id="614" label="WP_121030237_2"/>
      <node id="613" label="ANS70161_3"/>
      <node id="612" label="AXG59058_3"/>
      <node id="611" label="WP_078841030_3"/>
      <node id="610" label="OPF84252_3"/>
      <node id="609" label="WP_076825825_2"/>
      <node id="608" label="WP_091273394_4"/>
      <node id="607" label="WP_117355837_1"/>
      <node id="606" label="WP_122198059_1"/>
      <node id="605" label="WP_063274437_2"/>
      <node id="604" label="WP_112443292_6"/>
      <node id="603" label="PJJ46026_1"/>
      <node id="602" label="WP_100302197_1"/>
      <node id="601" label="ORA12704_2"/>
      <node id="600" label="WP_083115866_2"/>
      <node id="599" label="WP_082508744_2"/>
      <node id="598" label="KQR47999_2"/>
      <node id="597" label="WP_111166051_1"/>
      <node id="596" label="WP_067972339_1"/>
      <node id="595" label="WP_051458214_3"/>
      <node id="594" label="WP_046468711_1"/>
      <node id="593" label="KOG82578_2"/>
      <node id="592" label="WP_083191919_2"/>
      <node id="591" label="WP_101557149_3"/>
      <node id="590" label="WP_101557151_3"/>
      <node id="589" label="WP_128397239_5"/>
      <node id="588" label="WP_062097999_5"/>
      <node id="587" label="EGY78124_2"/>
      <node id="586" label="ERS23150_2"/>
      <node id="585" label="WP_029068734_3"/>
      <node id="584" label="WP_053775070_1"/>
      <node id="583" label="WP_083603298_1"/>
      <node id="582" label="OKL53160_1"/>
      <node id="581" label="WP_116026136_2"/>
      <node id="580" label="WP_116026137_2"/>
      <node id="579" label="WP_082008308_1"/>
      <node id="578" label="KHK96352_1"/>
      <node id="577" label="WP_122198059_3"/>
      <node id="576" label="WP_062760655_1"/>
      <node id="575" label="WP_009951067_3"/>
      <node id="574" label="CAM04239_4"/>
      <node id="573" label="CCB71037_2"/>
      <node id="572" label="WP_078590495_2"/>
      <node id="571" label="OJV25031_1"/>
      <node id="570" label="OJV24806_1"/>
      <node id="569" label="WP_123292376_1"/>
      <node id="568" label="ROS45991_1"/>
      <node id="567" label="WP_084692314_2"/>
      <node id="566" label="WP_084692311_4"/>
      <node id="565" label="WP_053676554_1"/>
      <node id="564" label="WP_094009173_1"/>
      <node id="563" label="WP_083752781_2"/>
      <node id="562" label="ONI88739_2"/>
      <node id="561" label="WP_095563712_4"/>
      <node id="560" label="WP_073387576_1"/>
      <node id="559" label="RKT76768_3"/>
      <node id="558" label="WP_121030237_3"/>
      <node id="557" label="WP_066216109_3"/>
      <node id="556" label="WP_107004474_3"/>
      <node id="555" label="WP_110050419_5"/>
      <node id="554" label="WP_017545560_2"/>
      <node id="553" label="WP_088261769_2"/>
      <node id="552" label="WP_088290452_2"/>
      <node id="551" label="WP_089774243_2"/>
      <node id="550" label="SEE89807_1"/>
      <node id="549" label="PYE15898_2"/>
      <node id="548" label="WP_110470681_2"/>
      <node id="547" label="OKH95170_2"/>
      <node id="546" label="WP_073785992_2"/>
      <node id="545" label="CAM04239_5"/>
      <node id="544" label="WP_009951067_4"/>
      <node id="543" label="WP_079177123_6"/>
      <node id="542" label="OIJ88146_6"/>
      <node id="541" label="OOC53575_2"/>
      <node id="540" label="WP_077689962_2"/>
      <node id="539" label="WP_083752781_1"/>
      <node id="538" label="ONI88739_1"/>
      <node id="537" label="WP_071042996_2"/>
      <node id="536" label="WP_071042994_2"/>
      <node id="535" label="OFK71393_3"/>
      <node id="534" label="WP_083296694_2"/>
      <node id="533" label="KOG82578_5"/>
      <node id="532" label="WP_083191919_4"/>
      <node id="531" label="SDL22458_2"/>
      <node id="530" label="WP_091051455_2"/>
      <node id="529" label="WP_093603934_1"/>
      <node id="528" label="SFR28131_1"/>
      <node id="527" label="WP_116154877_4"/>
      <node id="526" label="RED74809_4"/>
      <node id="525" label="ROS45991_3"/>
      <node id="524" label="WP_123292376_3"/>
      <node id="523" label="WP_133246044_1"/>
      <node id="522" label="PWF27333_1"/>
      <node id="521" label="WP_081384789_2"/>
      <node id="520" label="WP_075410821_1"/>
      <node id="519" label="WP_045196822_1"/>
      <node id="518" label="KZE98020_1"/>
      <node id="517" label="WP_079177123_2"/>
      <node id="516" label="OIJ88146_2"/>
      <node id="515" label="WP_035849420_8"/>
      <node id="514" label="WP_035849418_5"/>
      <node id="513" label="WP_057611617_1"/>
      <node id="512" label="WP_057611617_2"/>
      <node id="511" label="KOV37396_1"/>
      <node id="510" label="WP_107094495_1"/>
      <node id="509" label="WP_134664144_4"/>
      <node id="508" label="WP_112443341_1"/>
      <node id="507" label="KLO64220_5"/>
      <node id="506" label="WP_082128669_3"/>
      <node id="505" label="WP_091073170_2"/>
      <node id="504" label="SEQ04975_2"/>
      <node id="503" label="WP_028441277_3"/>
      <node id="502" label="WP_007495061_3"/>
      <node id="501" label="SGI74060_2"/>
      <node id="500" label="WP_079180155_2"/>
      <node id="499" label="RKT54190_1"/>
      <node id="498" label="WP_121005579_1"/>
      <node id="497" label="WP_086845754_1"/>
      <node id="496" label="WP_038682890_1"/>
      <node id="495" label="WP_082057091_3"/>
      <node id="494" label="AJT41785_3"/>
      <node id="493" label="CDM77002_1"/>
      <node id="492" label="AGC62644_2"/>
      <node id="491" label="WP_051268851_4"/>
      <node id="490" label="WP_026407791_2"/>
      <node id="489" label="WP_093357236_1"/>
      <node id="488" label="SFO40826_2"/>
      <node id="487" label="OLF11310_1"/>
      <node id="486" label="OLF11310_2"/>
      <node id="485" label="WP_080564860_1"/>
      <node id="484" label="ERS23150_3"/>
      <node id="483" label="WP_076002756_2"/>
      <node id="482" label="WP_020759490_1"/>
      <node id="481" label="AEB46035_1"/>
      <node id="480" label="WP_081476164_1"/>
      <node id="479" label="RED74809_8"/>
      <node id="478" label="WP_116154877_8"/>
      <node id="477" label="SDR04557_2"/>
      <node id="476" label="WP_093264055_2"/>
      <node id="475" label="OJH69022_5"/>
      <node id="474" label="WP_030288747_5"/>
      <node id="473" label="WP_132186408_3"/>
      <node id="472" label="WP_132186409_3"/>
      <node id="471" label="SEH00212_3"/>
      <node id="470" label="SEH00207_9005"/>
      <node id="469" label="OUE27579_3"/>
      <node id="468" label="OUE27580_3"/>
      <node id="467" label="WP_082163142_3"/>
      <node id="466" label="EFF80328_3"/>
      <node id="465" label="WP_058846818_1"/>
      <node id="464" label="WP_037658204_1"/>
      <node id="463" label="WP_040887728_2"/>
      <node id="462" label="EMF02011_2"/>
      <node id="461" label="WP_107778339_1"/>
      <node id="460" label="WP_107778338_1"/>
      <node id="459" label="WP_073704754_2"/>
      <node id="458" label="WP_077692191_1"/>
      <node id="457" label="PWK29583_3"/>
      <node id="456" label="WP_093610459_2"/>
      <node id="455" label="WP_083115866_1"/>
      <node id="454" label="ORA12704_1"/>
      <node id="453" label="WP_131785729_2"/>
      <node id="452" label="WP_131785730_2"/>
      <node id="451" label="EWC60518_1"/>
      <node id="450" label="WP_075973981_1"/>
      <node id="449" label="ROS76630_1"/>
      <node id="448" label="WP_123307848_1"/>
      <node id="447" label="GCB48186_2"/>
      <node id="446" label="WP_124441159_2"/>
      <node id="445" label="BAM28031_2"/>
      <node id="444" label="WP_087454409_2"/>
      <node id="443" label="WP_117401160_1"/>
      <node id="442" label="WP_117401161_1"/>
      <node id="441" label="WP_052311581_1"/>
      <node id="440" label="AEV84085_1"/>
      <node id="439" label="OXL32905_2"/>
      <node id="438" label="WP_089507734_2"/>
      <node id="437" label="WP_090073899_1"/>
      <node id="436" label="WP_082373216_1"/>
      <node id="435" label="WP_084580442_3"/>
      <node id="434" label="EWM17971_2"/>
      <node id="433" label="OIJ88146_5"/>
      <node id="432" label="WP_079177123_5"/>
      <node id="431" label="ONF71729_2"/>
      <node id="430" label="WP_083715657_2"/>
      <node id="429" label="WP_107308000_2"/>
      <node id="428" label="WP_033309246_2"/>
      <node id="427" label="WP_071042996_5"/>
      <node id="426" label="WP_071042994_4"/>
      <node id="425" label="WP_116708219_2"/>
      <node id="424" label="WP_133828511_2"/>
      <node id="423" label="WP_091073170_1"/>
      <node id="422" label="SEQ04975_1"/>
      <node id="421" label="WP_080968710_2"/>
      <node id="420" label="KMT47190_5"/>
      <node id="419" label="EXG81129_2"/>
      <node id="418" label="WP_035861760_2"/>
      <node id="417" label="KHK96352_2"/>
      <node id="416" label="WP_082008308_2"/>
      <node id="415" label="WP_052038751_3"/>
      <node id="414" label="WP_076002756_3"/>
      <node id="413" label="OUE29607_1"/>
      <node id="412" label="OUE29606_1"/>
      <node id="411" label="OKL53160_3"/>
      <node id="410" label="WP_083603298_3"/>
      <node id="409" label="SBT66104_2"/>
      <node id="408" label="WP_098744376_2"/>
      <node id="407" label="WP_081453250_2"/>
      <node id="406" label="ACZ89043_2"/>
      <node id="405" label="QBI53056_9001"/>
      <node id="404" label="WP_131102102_9001"/>
      <node id="403" label="KJK44488_3"/>
      <node id="402" label="WP_082115066_3"/>
      <node id="401" label="PDQ36099_2"/>
      <node id="400" label="PDQ36095_4"/>
      <node id="399" label="WP_030578068_1"/>
      <node id="398" label="WP_119286192_2"/>
      <node id="397" label="WP_123971014_4"/>
      <node id="396" label="RPF24868_3"/>
      <node id="395" label="WP_083982727_1"/>
      <node id="394" label="WP_114029352_1"/>
      <node id="393" label="OKJ94941_1"/>
      <node id="392" label="WP_084902797_2"/>
      <node id="391" label="WP_031027146_3"/>
      <node id="390" label="KPC95547_3"/>
      <node id="389" label="WP_017177815_1"/>
      <node id="388" label="WP_073452776_2"/>
      <node id="387" label="SDG90099_2"/>
      <node id="386" label="WP_091067169_3"/>
      <node id="385" label="PDQ36095_2"/>
      <node id="384" label="PDQ36093_3"/>
      <node id="383" label="WP_091114658_2"/>
      <node id="382" label="WP_093583210_5"/>
      <node id="381" label="KOG82578_6"/>
      <node id="380" label="KOU46944_4"/>
      <node id="379" label="OPF84252_1"/>
      <node id="378" label="WP_078841030_1"/>
      <node id="377" label="SEE89807_2"/>
      <node id="376" label="WP_089774243_3"/>
      <node id="375" label="SFN21853_1"/>
      <node id="374" label="WP_083597223_1"/>
      <node id="373" label="SDR04557_1"/>
      <node id="372" label="WP_093264055_1"/>
      <node id="371" label="KIE24863_3"/>
      <node id="370" label="WP_052318929_2"/>
      <node id="369" label="WP_116110588_1"/>
      <node id="368" label="WP_094002561_1"/>
      <node id="367" label="RKT36058_3"/>
      <node id="366" label="WP_121148667_2"/>
      <node id="365" label="WP_083715657_1"/>
      <node id="364" label="ONF71729_1"/>
      <node id="363" label="WP_092862843_2"/>
      <node id="362" label="SDQ22037_2"/>
      <node id="361" label="RKT76768_1"/>
      <node id="360" label="WP_121030237_1"/>
      <node id="359" label="WP_090039557_2"/>
      <node id="358" label="WP_064110435_2"/>
      <node id="357" label="WP_078515914_2"/>
      <node id="356" label="WP_028427539_3"/>
      <node id="355" label="WP_018962008_4"/>
      <node id="354" label="WP_018962008_7"/>
      <node id="353" label="WP_012086849_1"/>
      <node id="352" label="WP_023550873_2"/>
      <node id="351" label="WP_112443292_2"/>
      <node id="350" label="WP_071934999_1"/>
      <node id="349" label="SEH00212_2"/>
      <node id="348" label="WP_084415984_1"/>
      <node id="347" label="WP_129587643_3"/>
      <node id="346" label="WP_080654621_1"/>
      <node id="345" label="WP_084415931_3"/>
      <node id="344" label="AND16936_3"/>
      <node id="343" label="WP_119835460_1"/>
      <node id="342" label="WP_120205519_1"/>
      <node id="341" label="WP_131102102_1"/>
      <node id="340" label="QBI53056_1"/>
      <node id="339" label="WP_037862255_1"/>
      <node id="338" label="WP_063758854_1"/>
      <node id="337" label="PZS01282_1"/>
      <node id="336" label="WP_134128179_1"/>
      <node id="335" label="WP_078561279_3"/>
      <node id="334" label="EFL12569_2"/>
      <node id="333" label="WP_119286192_3"/>
      <node id="332" label="WP_030578068_2"/>
      <node id="331" label="WP_052499830_2"/>
      <node id="330" label="WP_062760655_3"/>
      <node id="329" label="WP_130451801_2"/>
      <node id="328" label="WP_123074529_2"/>
      <node id="327" label="WP_040887728_3"/>
      <node id="326" label="EMF02011_3"/>
      <node id="325" label="WP_123601959_1"/>
      <node id="324" label="WP_123601960_1"/>
      <node id="323" label="OLB80605_4"/>
      <node id="322" label="WP_116200011_3"/>
      <node id="321" label="WP_090014707_4"/>
      <node id="320" label="SDN00667_4"/>
      <node id="319" label="SDQ22037_1"/>
      <node id="318" label="WP_092862843_1"/>
      <node id="317" label="WP_111166051_3"/>
      <node id="316" label="WP_067972339_3"/>
      <node id="315" label="OJV25031_3"/>
      <node id="314" label="OJV25031_2"/>
      <node id="313" label="PKV30436_1"/>
      <node id="312" label="WP_101368245_1"/>
      <node id="311" label="WP_110911190_4"/>
      <node id="310" label="WP_111209344_3"/>
      <node id="309" label="WP_054213495_1"/>
      <node id="308" label="KPI20077_1"/>
      <node id="307" label="WP_084523472_2"/>
      <node id="306" label="WP_067823333_3"/>
      <node id="305" label="WP_052129072_2"/>
      <node id="304" label="WP_080754833_2"/>
      <node id="303" label="KLO64220_3"/>
      <node id="302" label="WP_082128669_1"/>
      <node id="301" label="PDQ36093_2"/>
      <node id="300" label="PDQ36095_1"/>
      <node id="299" label="WP_084692311_5"/>
      <node id="298" label="WP_084692314_3"/>
      <node id="297" label="SDN00667_3"/>
      <node id="296" label="WP_090014707_3"/>
      <node id="295" label="WP_083191919_6"/>
      <node id="294" label="KOG82578_7"/>
      <node id="293" label="WP_058846818_2"/>
      <node id="292" label="WP_037658204_2"/>
      <node id="291" label="WP_053729792_1"/>
      <node id="290" label="WP_053729790_1"/>
      <node id="289" label="OJH69022_1"/>
      <node id="288" label="WP_030288747_1"/>
      <node id="287" label="WP_120571834_2"/>
      <node id="286" label="WP_120571833_2"/>
      <node id="285" label="WP_079182634_2"/>
      <node id="284" label="OKI46856_2"/>
      <node id="283" label="WP_084692311_7"/>
      <node id="282" label="WP_084692314_5"/>
      <node id="281" label="PDQ36093_6"/>
      <node id="280" label="PDQ36095_5"/>
      <node id="279" label="WP_093544729_3"/>
      <node id="278" label="SCD31130_3"/>
      <node id="277" label="WP_083597223_2"/>
      <node id="276" label="SFN21853_3"/>
      <node id="275" label="WP_123601959_3"/>
      <node id="274" label="WP_123601960_3"/>
      <node id="273" label="SIK72068_5"/>
      <node id="272" label="WP_083019015_3"/>
      <node id="271" label="SEC38602_1"/>
      <node id="270" label="WP_126898321_1"/>
      <node id="269" label="WP_091159224_2"/>
      <node id="268" label="SDY68794_2"/>
      <node id="267" label="WP_086861034_2"/>
      <node id="266" label="WP_079054543_2"/>
      <node id="265" label="WP_092533827_1"/>
      <node id="264" label="WP_067908345_1"/>
      <node id="263" label="WP_092779820_2"/>
      <node id="262" label="WP_121394015_2"/>
      <node id="261" label="WP_030172142_1"/>
      <node id="260" label="WP_030172139_1"/>
      <node id="259" label="WP_083715654_1"/>
      <node id="258" label="ONF71727_1"/>
      <node id="257" label="WP_059190156_1"/>
      <node id="256" label="WP_097276114_1"/>
      <node id="255" label="EWM18075_1"/>
      <node id="254" label="WP_052396081_1"/>
      <node id="253" label="WP_071129084_3"/>
      <node id="252" label="WP_122819575_2"/>
      <node id="251" label="ORC04864_2"/>
      <node id="250" label="WP_082275447_3"/>
      <node id="249" label="WP_052396081_2"/>
      <node id="248" label="EWM18075_2"/>
      <node id="247" label="WP_126382826_1"/>
      <node id="246" label="WP_126382827_1"/>
      <node id="245" label="WP_040899039_2"/>
      <node id="244" label="EJJ05688_2"/>
      <node id="243" label="WP_084580442_2"/>
      <node id="242" label="EWM17971_1"/>
      <node id="241" label="WP_124441159_1"/>
      <node id="240" label="GCB48186_1"/>
      <node id="239" label="WP_083597719_1"/>
      <node id="238" label="SFO39709_1"/>
      <node id="237" label="WP_079611677_2"/>
      <node id="236" label="WP_100521517_2"/>
      <node id="235" label="WP_122198059_2"/>
      <node id="234" label="WP_117355837_2"/>
      <node id="233" label="WP_091040567_4"/>
      <node id="232" label="SDE51953_3"/>
      <node id="231" label="WP_049566251_1"/>
      <node id="230" label="WP_100806338_1"/>
      <node id="229" label="RKS80725_2"/>
      <node id="228" label="WP_121191582_2"/>
      <node id="227" label="WP_094931980_1"/>
      <node id="226" label="WP_124799873_2"/>
      <node id="225" label="AKJ11407_3"/>
      <node id="224" label="AKJ11412_3"/>
      <node id="223" label="EFF80328_2"/>
      <node id="222" label="WP_082163142_2"/>
      <node id="221" label="WP_101557151_2"/>
      <node id="220" label="WP_101557149_2"/>
      <node id="219" label="SDN00667_1"/>
      <node id="218" label="WP_090014707_1"/>
      <node id="217" label="WP_009951067_1"/>
      <node id="216" label="CAM04239_1"/>
      <node id="215" label="WP_111209344_2"/>
      <node id="214" label="SBN62121_1"/>
      <node id="213" label="WP_073785992_1"/>
      <node id="212" label="OKH95170_1"/>
      <node id="211" label="EXG81129_3"/>
      <node id="210" label="WP_035861760_3"/>
      <node id="209" label="WP_081907113_2"/>
      <node id="208" label="WP_073387576_3"/>
      <node id="207" label="WP_064282747_1"/>
      <node id="206" label="KKF03247_1"/>
      <node id="205" label="RPF24868_1"/>
      <node id="204" label="WP_123971014_1"/>
      <node id="203" label="WP_121394015_3"/>
      <node id="202" label="WP_092779820_3"/>
      <node id="201" label="WP_051751858_2"/>
      <node id="200" label="WP_131736173_1"/>
      <node id="199" label="WP_084011357_3"/>
      <node id="198" label="WP_045877303_3"/>
      <node id="197" label="WP_123603612_3"/>
      <node id="196" label="WP_033342998_1"/>
      <node id="195" label="WP_086513413_2"/>
      <node id="194" label="WP_086513414_2"/>
      <node id="193" label="WP_107004474_2"/>
      <node id="192" label="WP_066216109_1"/>
      <node id="191" label="EEZ91469_3"/>
      <node id="190" label="WP_004017479_2"/>
      <node id="189" label="WP_098744376_1"/>
      <node id="188" label="SBT66104_1"/>
      <node id="187" label="OKL50794_1"/>
      <node id="186" label="WP_124913393_2"/>
      <node id="185" label="WP_097276114_3"/>
      <node id="184" label="SDE31545_3"/>
      <node id="183" label="SFD04819_1"/>
      <node id="182" label="WP_028567914_2"/>
      <node id="181" label="EFL12569_1"/>
      <node id="180" label="WP_078561279_1"/>
      <node id="179" label="WP_081323045_1"/>
      <node id="178" label="KTR94659_1"/>
      <node id="177" label="OXL32905_1"/>
      <node id="176" label="WP_089507734_1"/>
      <node id="175" label="WP_082115066_1"/>
      <node id="174" label="KJK44488_1"/>
      <node id="173" label="WP_082320087_1"/>
      <node id="172" label="EPJ34556_2"/>
      <node id="171" label="WP_090039557_3"/>
      <node id="170" label="WP_064110435_3"/>
      <node id="169" label="WP_054569301_1"/>
      <node id="168" label="WP_018637157_1"/>
      <node id="167" label="KPI20077_2"/>
      <node id="166" label="WP_054213495_2"/>
      <node id="165" label="WP_080564860_3"/>
      <node id="164" label="WP_083982727_2"/>
      <node id="163" label="WP_086461443_2"/>
      <node id="162" label="WP_086461444_2"/>
      <node id="161" label="WP_027737671_1"/>
      <node id="160" label="WP_027737668_1"/>
      <node id="159" label="WP_042407643_4"/>
      <node id="158" label="WP_042407643_3"/>
      <node id="157" label="WP_083753877_1"/>
      <node id="156" label="ONI75210_1"/>
      <node id="155" label="WP_053729792_3"/>
      <node id="154" label="WP_053729790_3"/>
      <node id="153" label="WP_054049769_2"/>
      <node id="152" label="WP_091371144_1"/>
      <node id="151" label="WP_059082757_1"/>
      <node id="150" label="GAQ65395_1"/>
      <node id="149" label="WP_094002561_2"/>
      <node id="148" label="WP_116110588_2"/>
      <node id="147" label="WP_054046275_1"/>
      <node id="146" label="EWC60518_2"/>
      <node id="145" label="AFJ68075_2"/>
      <node id="144" label="WP_067908345_2"/>
      <node id="143" label="KZE98020_3"/>
      <node id="142" label="WP_045196822_3"/>
      <node id="141" label="WP_091674323_2"/>
      <node id="140" label="SFB39971_2"/>
      <node id="139" label="WP_116154877_2"/>
      <node id="138" label="RED74809_2"/>
      <node id="137" label="OJV24808_1"/>
      <node id="136" label="OJV24806_2"/>
      <node id="135" label="WP_053729790_4"/>
      <node id="134" label="WP_053729792_4"/>
      <node id="133" label="WP_082115066_2"/>
      <node id="132" label="KJK44488_2"/>
      <node id="131" label="WP_079180155_3"/>
      <node id="130" label="SGI74060_3"/>
      <node id="129" label="WP_040899039_1"/>
      <node id="128" label="EJJ05688_1"/>
      <node id="127" label="WP_097165202_2"/>
      <node id="126" label="WP_104263679_3"/>
      <node id="125" label="WP_081707409_1"/>
      <node id="124" label="ERK54887_1"/>
      <node id="123" label="WP_076045700_1"/>
      <node id="122" label="WP_060180042_2"/>
      <node id="121" label="WP_086858376_4"/>
      <node id="120" label="WP_086858376_3"/>
      <node id="119" label="WP_111862863_1"/>
      <node id="118" label="WP_111862862_1"/>
      <node id="117" label="WP_125807935_1"/>
      <node id="116" label="RSM56874_1"/>
      <node id="115" label="WP_065164254_4"/>
      <node id="114" label="WP_061921822_1"/>
      <node id="113" label="WP_018962008_5"/>
      <node id="112" label="WP_018962008_8"/>
      <node id="111" label="RED74809_3"/>
      <node id="110" label="WP_116154877_3"/>
      <node id="109" label="WP_035849420_7"/>
      <node id="108" label="WP_035849418_4"/>
      <node id="107" label="WP_075410821_2"/>
      <node id="106" label="WP_081384789_3"/>
      <node id="105" label="WP_085670625_1"/>
      <node id="104" label="WP_083113299_2"/>
      <node id="103" label="WP_111334328_1"/>
      <node id="102" label="PKV33869_5"/>
      <node id="101" label="WP_116026136_1"/>
      <node id="100" label="WP_116026137_1"/>
      <node id="99" label="AXK36692_2"/>
      <node id="98" label="AXK36690_3"/>
      <node id="97" label="WP_121405200_3"/>
      <node id="96" label="WP_100045344_3"/>
      <node id="95" label="WP_083609312_2"/>
      <node id="94" label="OKI12399_2"/>
      <node id="93" label="WP_126382826_3"/>
      <node id="92" label="WP_126382827_4"/>
      <node id="91" label="OKH95170_3"/>
      <node id="90" label="WP_073785992_3"/>
      <node id="89" label="WP_095563712_3"/>
      <node id="88" label="WP_095563712_2"/>
      <node id="87" label="WP_053619387_1"/>
      <node id="86" label="WP_121183327_1"/>
      <node id="85" label="WP_123601959_4"/>
      <node id="84" label="WP_123601960_4"/>
      <node id="83" label="WP_131785730_4"/>
      <node id="82" label="WP_131785729_4"/>
      <node id="81" label="WP_103341360_1"/>
      <node id="80" label="WP_131735418_1"/>
      <node id="79" label="WP_084580442_1"/>
      <node id="78" label="REH37226_1"/>
      <node id="77" label="WP_073452776_1"/>
      <node id="76" label="WP_017177815_2"/>
      <node id="75" label="WP_090039557_6"/>
      <node id="74" label="WP_083091741_1"/>
      <node id="73" label="COV81994_2"/>
      <node id="72" label="AGL26862_1"/>
      <node id="71" label="WP_107778339_3"/>
      <node id="70" label="WP_107778338_3"/>
      <node id="69" label="WP_104181080_3"/>
      <node id="68" label="WP_105032337_3"/>
      <node id="67" label="PDQ36095_3"/>
      <node id="66" label="PDQ36093_4"/>
      <node id="65" label="SEC29390_2"/>
      <node id="64" label="WP_066215709_2"/>
      <node id="63" label="PWF27333_2"/>
      <node id="62" label="WP_133246044_2"/>
      <edge id="29793" label="WP_040271779_1 (pp) ONI75210_2" source="2553" target="2552" cy:directed="1"/>
      <edge id="29792" label="WP_040271779_1 (pp) WP_086780456_1" source="2553" target="2551" cy:directed="1"/>
      <edge id="29791" label="WP_040271779_1 (pp) WP_055876321_1" source="2553" target="2550" cy:directed="1"/>
      <edge id="29790" label="WP_040271779_1 (pp) WP_125937921_2" source="2553" target="2549" cy:directed="1"/>
      <edge id="29789" label="WP_040271779_1 (pp) WP_081761968_1" source="2553" target="2548" cy:directed="1"/>
      <edge id="29788" label="WP_040271779_1 (pp) WP_096287923_1" source="2553" target="2547" cy:directed="1"/>
      <edge id="29787" label="WP_040271779_1 (pp) WP_090858762_1" source="2553" target="2546" cy:directed="1"/>
      <edge id="29786" label="WP_040271779_1 (pp) WP_115920406_2" source="2553" target="2545" cy:directed="1"/>
      <edge id="29785" label="WP_040271779_1 (pp) ALG08515_1" source="2553" target="2544" cy:directed="1"/>
      <edge id="29784" label="WP_040271779_1 (pp) WP_121830363_1" source="2553" target="2543" cy:directed="1"/>
      <edge id="29783" label="WP_040271779_1 (pp) WP_107004474_1" source="2553" target="2542" cy:directed="1"/>
      <edge id="29782" label="WP_040271779_1 (pp) WP_081907113_1" source="2553" target="2541" cy:directed="1"/>
      <edge id="29781" label="WP_040271779_1 (pp) WP_073876556_1" source="2553" target="2540" cy:directed="1"/>
      <edge id="29780" label="WP_040271779_1 (pp) WP_053623192_1" source="2553" target="2539" cy:directed="1"/>
      <edge id="29779" label="WP_040271779_1 (pp) RPK87717_1" source="2553" target="2538" cy:directed="1"/>
      <edge id="29778" label="WP_040271779_1 (pp) WP_116951408_3" source="2553" target="2537" cy:directed="1"/>
      <edge id="29777" label="WP_040271779_1 (pp) WP_129802804_1" source="2553" target="2536" cy:directed="1"/>
      <edge id="29776" label="WP_040271779_1 (pp) EHM27670_1" source="2553" target="2535" cy:directed="1"/>
      <edge id="29775" label="WP_086780456_1 (pp) ONI75210_2" source="2551" target="2552" cy:directed="1"/>
      <edge id="29774" label="WP_086780456_1 (pp) WP_096287923_1" source="2551" target="2547" cy:directed="1"/>
      <edge id="29773" label="WP_086780456_1 (pp) WP_090858762_1" source="2551" target="2546" cy:directed="1"/>
      <edge id="29772" label="WP_086780456_1 (pp) WP_121830363_1" source="2551" target="2543" cy:directed="1"/>
      <edge id="29771" label="WP_086780456_1 (pp) WP_081907113_1" source="2551" target="2541" cy:directed="1"/>
      <edge id="29770" label="WP_086780456_1 (pp) WP_053623192_1" source="2551" target="2539" cy:directed="1"/>
      <edge id="29769" label="WP_055876321_1 (pp) ONI75210_2" source="2550" target="2552" cy:directed="1"/>
      <edge id="29768" label="WP_055876321_1 (pp) WP_086780456_1" source="2550" target="2551" cy:directed="1"/>
      <edge id="29767" label="WP_055876321_1 (pp) WP_096287923_1" source="2550" target="2547" cy:directed="1"/>
      <edge id="29766" label="WP_055876321_1 (pp) WP_121830363_1" source="2550" target="2543" cy:directed="1"/>
      <edge id="29765" label="WP_055876321_1 (pp) WP_081907113_1" source="2550" target="2541" cy:directed="1"/>
      <edge id="29764" label="WP_055876321_1 (pp) WP_053623192_1" source="2550" target="2539" cy:directed="1"/>
      <edge id="29763" label="WP_125937921_2 (pp) ONI75210_2" source="2549" target="2552" cy:directed="1"/>
      <edge id="29762" label="WP_125937921_2 (pp) WP_086780456_1" source="2549" target="2551" cy:directed="1"/>
      <edge id="29761" label="WP_125937921_2 (pp) WP_055876321_1" source="2549" target="2550" cy:directed="1"/>
      <edge id="29760" label="WP_125937921_2 (pp) WP_096287923_1" source="2549" target="2547" cy:directed="1"/>
      <edge id="29759" label="WP_125937921_2 (pp) WP_090858762_1" source="2549" target="2546" cy:directed="1"/>
      <edge id="29758" label="WP_125937921_2 (pp) WP_121830363_1" source="2549" target="2543" cy:directed="1"/>
      <edge id="29757" label="WP_125937921_2 (pp) WP_081907113_1" source="2549" target="2541" cy:directed="1"/>
      <edge id="29756" label="WP_125937921_2 (pp) WP_053623192_1" source="2549" target="2539" cy:directed="1"/>
      <edge id="29755" label="WP_081761968_1 (pp) ONI75210_2" source="2548" target="2552" cy:directed="1"/>
      <edge id="29754" label="WP_081761968_1 (pp) WP_086780456_1" source="2548" target="2551" cy:directed="1"/>
      <edge id="29753" label="WP_081761968_1 (pp) WP_055876321_1" source="2548" target="2550" cy:directed="1"/>
      <edge id="29752" label="WP_081761968_1 (pp) WP_125937921_2" source="2548" target="2549" cy:directed="1"/>
      <edge id="29751" label="WP_081761968_1 (pp) WP_096287923_1" source="2548" target="2547" cy:directed="1"/>
      <edge id="29750" label="WP_081761968_1 (pp) WP_090858762_1" source="2548" target="2546" cy:directed="1"/>
      <edge id="29749" label="WP_081761968_1 (pp) WP_121830363_1" source="2548" target="2543" cy:directed="1"/>
      <edge id="29748" label="WP_081761968_1 (pp) WP_081907113_1" source="2548" target="2541" cy:directed="1"/>
      <edge id="29747" label="WP_081761968_1 (pp) WP_067823333_1" source="2548" target="2429" cy:directed="1"/>
      <edge id="29746" label="WP_081761968_1 (pp) WP_053623192_1" source="2548" target="2539" cy:directed="1"/>
      <edge id="29745" label="WP_096287923_1 (pp) ONI75210_2" source="2547" target="2552" cy:directed="1"/>
      <edge id="29744" label="WP_090858762_1 (pp) ONI75210_2" source="2546" target="2552" cy:directed="1"/>
      <edge id="29743" label="WP_090858762_1 (pp) WP_096287923_1" source="2546" target="2547" cy:directed="1"/>
      <edge id="29742" label="WP_115920406_2 (pp) ONI75210_2" source="2545" target="2552" cy:directed="1"/>
      <edge id="29741" label="WP_115920406_2 (pp) WP_086780456_1" source="2545" target="2551" cy:directed="1"/>
      <edge id="29740" label="WP_115920406_2 (pp) WP_055876321_1" source="2545" target="2550" cy:directed="1"/>
      <edge id="29739" label="WP_115920406_2 (pp) WP_125937921_2" source="2545" target="2549" cy:directed="1"/>
      <edge id="29738" label="WP_115920406_2 (pp) WP_081761968_1" source="2545" target="2548" cy:directed="1"/>
      <edge id="29737" label="WP_115920406_2 (pp) WP_096287923_1" source="2545" target="2547" cy:directed="1"/>
      <edge id="29736" label="WP_115920406_2 (pp) WP_090858762_1" source="2545" target="2546" cy:directed="1"/>
      <edge id="29735" label="WP_115920406_2 (pp) WP_121830363_1" source="2545" target="2543" cy:directed="1"/>
      <edge id="29734" label="WP_115920406_2 (pp) WP_081907113_1" source="2545" target="2541" cy:directed="1"/>
      <edge id="29733" label="WP_115920406_2 (pp) WP_053623192_1" source="2545" target="2539" cy:directed="1"/>
      <edge id="29732" label="ALG08515_1 (pp) ONI75210_2" source="2544" target="2552" cy:directed="1"/>
      <edge id="29731" label="ALG08515_1 (pp) WP_086780456_1" source="2544" target="2551" cy:directed="1"/>
      <edge id="29730" label="ALG08515_1 (pp) WP_055876321_1" source="2544" target="2550" cy:directed="1"/>
      <edge id="29729" label="ALG08515_1 (pp) WP_125937921_2" source="2544" target="2549" cy:directed="1"/>
      <edge id="29728" label="ALG08515_1 (pp) WP_081761968_1" source="2544" target="2548" cy:directed="1"/>
      <edge id="29727" label="ALG08515_1 (pp) WP_096287923_1" source="2544" target="2547" cy:directed="1"/>
      <edge id="29726" label="ALG08515_1 (pp) WP_090858762_1" source="2544" target="2546" cy:directed="1"/>
      <edge id="29725" label="ALG08515_1 (pp) WP_115920406_2" source="2544" target="2545" cy:directed="1"/>
      <edge id="29724" label="ALG08515_1 (pp) WP_121830363_1" source="2544" target="2543" cy:directed="1"/>
      <edge id="29723" label="ALG08515_1 (pp) WP_081907113_1" source="2544" target="2541" cy:directed="1"/>
      <edge id="29722" label="ALG08515_1 (pp) WP_053623192_1" source="2544" target="2539" cy:directed="1"/>
      <edge id="29721" label="WP_121830363_1 (pp) ONI75210_2" source="2543" target="2552" cy:directed="1"/>
      <edge id="29720" label="WP_121830363_1 (pp) WP_096287923_1" source="2543" target="2547" cy:directed="1"/>
      <edge id="29719" label="WP_121830363_1 (pp) WP_090858762_1" source="2543" target="2546" cy:directed="1"/>
      <edge id="29718" label="WP_107004474_1 (pp) ONI75210_2" source="2542" target="2552" cy:directed="1"/>
      <edge id="29717" label="WP_107004474_1 (pp) WP_086780456_1" source="2542" target="2551" cy:directed="1"/>
      <edge id="29716" label="WP_107004474_1 (pp) WP_055876321_1" source="2542" target="2550" cy:directed="1"/>
      <edge id="29715" label="WP_107004474_1 (pp) WP_125937921_2" source="2542" target="2549" cy:directed="1"/>
      <edge id="29714" label="WP_107004474_1 (pp) WP_081761968_1" source="2542" target="2548" cy:directed="1"/>
      <edge id="29713" label="WP_107004474_1 (pp) WP_096287923_1" source="2542" target="2547" cy:directed="1"/>
      <edge id="29712" label="WP_107004474_1 (pp) WP_090858762_1" source="2542" target="2546" cy:directed="1"/>
      <edge id="29711" label="WP_107004474_1 (pp) WP_115920406_2" source="2542" target="2545" cy:directed="1"/>
      <edge id="29710" label="WP_107004474_1 (pp) ALG08515_1" source="2542" target="2544" cy:directed="1"/>
      <edge id="29709" label="WP_107004474_1 (pp) WP_121830363_1" source="2542" target="2543" cy:directed="1"/>
      <edge id="29708" label="WP_107004474_1 (pp) WP_098957614_1" source="2542" target="2386" cy:directed="1"/>
      <edge id="29707" label="WP_107004474_1 (pp) WP_081907113_1" source="2542" target="2541" cy:directed="1"/>
      <edge id="29706" label="WP_107004474_1 (pp) WP_053623192_1" source="2542" target="2539" cy:directed="1"/>
      <edge id="29705" label="WP_081907113_1 (pp) ONI75210_2" source="2541" target="2552" cy:directed="1"/>
      <edge id="29704" label="WP_081907113_1 (pp) WP_096287923_1" source="2541" target="2547" cy:directed="1"/>
      <edge id="29703" label="WP_081907113_1 (pp) WP_090858762_1" source="2541" target="2546" cy:directed="1"/>
      <edge id="29702" label="WP_081907113_1 (pp) WP_121830363_1" source="2541" target="2543" cy:directed="1"/>
      <edge id="29701" label="WP_073876556_1 (pp) ONI75210_2" source="2540" target="2552" cy:directed="1"/>
      <edge id="29700" label="WP_073876556_1 (pp) WP_086780456_1" source="2540" target="2551" cy:directed="1"/>
      <edge id="29699" label="WP_073876556_1 (pp) WP_055876321_1" source="2540" target="2550" cy:directed="1"/>
      <edge id="29698" label="WP_073876556_1 (pp) WP_125937921_2" source="2540" target="2549" cy:directed="1"/>
      <edge id="29697" label="WP_073876556_1 (pp) WP_081761968_1" source="2540" target="2548" cy:directed="1"/>
      <edge id="29696" label="WP_073876556_1 (pp) WP_096287923_1" source="2540" target="2547" cy:directed="1"/>
      <edge id="29695" label="WP_073876556_1 (pp) WP_090858762_1" source="2540" target="2546" cy:directed="1"/>
      <edge id="29694" label="WP_073876556_1 (pp) WP_115920406_2" source="2540" target="2545" cy:directed="1"/>
      <edge id="29693" label="WP_073876556_1 (pp) ALG08515_1" source="2540" target="2544" cy:directed="1"/>
      <edge id="29692" label="WP_073876556_1 (pp) WP_121830363_1" source="2540" target="2543" cy:directed="1"/>
      <edge id="29691" label="WP_073876556_1 (pp) WP_107004474_1" source="2540" target="2542" cy:directed="1"/>
      <edge id="29690" label="WP_073876556_1 (pp) WP_081907113_1" source="2540" target="2541" cy:directed="1"/>
      <edge id="29689" label="WP_073876556_1 (pp) WP_053623192_1" source="2540" target="2539" cy:directed="1"/>
      <edge id="29688" label="WP_053623192_1 (pp) ONI75210_2" source="2539" target="2552" cy:directed="1"/>
      <edge id="29687" label="WP_053623192_1 (pp) WP_096287923_1" source="2539" target="2547" cy:directed="1"/>
      <edge id="29686" label="WP_053623192_1 (pp) WP_090858762_1" source="2539" target="2546" cy:directed="1"/>
      <edge id="29685" label="WP_053623192_1 (pp) WP_121830363_1" source="2539" target="2543" cy:directed="1"/>
      <edge id="29684" label="WP_053623192_1 (pp) WP_081907113_1" source="2539" target="2541" cy:directed="1"/>
      <edge id="29683" label="RPK87717_1 (pp) ONI75210_2" source="2538" target="2552" cy:directed="1"/>
      <edge id="29682" label="RPK87717_1 (pp) WP_086780456_1" source="2538" target="2551" cy:directed="1"/>
      <edge id="29681" label="RPK87717_1 (pp) WP_055876321_1" source="2538" target="2550" cy:directed="1"/>
      <edge id="29680" label="RPK87717_1 (pp) WP_125937921_2" source="2538" target="2549" cy:directed="1"/>
      <edge id="29679" label="RPK87717_1 (pp) WP_081761968_1" source="2538" target="2548" cy:directed="1"/>
      <edge id="29678" label="RPK87717_1 (pp) WP_096287923_1" source="2538" target="2547" cy:directed="1"/>
      <edge id="29677" label="RPK87717_1 (pp) WP_090858762_1" source="2538" target="2546" cy:directed="1"/>
      <edge id="29676" label="RPK87717_1 (pp) WP_115920406_2" source="2538" target="2545" cy:directed="1"/>
      <edge id="29675" label="RPK87717_1 (pp) ALG08515_1" source="2538" target="2544" cy:directed="1"/>
      <edge id="29674" label="RPK87717_1 (pp) WP_121830363_1" source="2538" target="2543" cy:directed="1"/>
      <edge id="29673" label="RPK87717_1 (pp) WP_107004474_1" source="2538" target="2542" cy:directed="1"/>
      <edge id="29672" label="RPK87717_1 (pp) WP_081907113_1" source="2538" target="2541" cy:directed="1"/>
      <edge id="29671" label="RPK87717_1 (pp) WP_073876556_1" source="2538" target="2540" cy:directed="1"/>
      <edge id="29670" label="RPK87717_1 (pp) WP_053623192_1" source="2538" target="2539" cy:directed="1"/>
      <edge id="29669" label="WP_116951408_3 (pp) ONI75210_2" source="2537" target="2552" cy:directed="1"/>
      <edge id="29668" label="WP_116951408_3 (pp) WP_086780456_1" source="2537" target="2551" cy:directed="1"/>
      <edge id="29667" label="WP_116951408_3 (pp) WP_055876321_1" source="2537" target="2550" cy:directed="1"/>
      <edge id="29666" label="WP_116951408_3 (pp) WP_125937921_2" source="2537" target="2549" cy:directed="1"/>
      <edge id="29665" label="WP_116951408_3 (pp) WP_081761968_1" source="2537" target="2548" cy:directed="1"/>
      <edge id="29664" label="WP_116951408_3 (pp) WP_096287923_1" source="2537" target="2547" cy:directed="1"/>
      <edge id="29663" label="WP_116951408_3 (pp) WP_090858762_1" source="2537" target="2546" cy:directed="1"/>
      <edge id="29662" label="WP_116951408_3 (pp) WP_115920406_2" source="2537" target="2545" cy:directed="1"/>
      <edge id="29661" label="WP_116951408_3 (pp) ALG08515_1" source="2537" target="2544" cy:directed="1"/>
      <edge id="29660" label="WP_116951408_3 (pp) WP_121830363_1" source="2537" target="2543" cy:directed="1"/>
      <edge id="29659" label="WP_116951408_3 (pp) WP_107004474_1" source="2537" target="2542" cy:directed="1"/>
      <edge id="29658" label="WP_116951408_3 (pp) WP_081907113_1" source="2537" target="2541" cy:directed="1"/>
      <edge id="29657" label="WP_116951408_3 (pp) WP_073876556_1" source="2537" target="2540" cy:directed="1"/>
      <edge id="29656" label="WP_116951408_3 (pp) WP_053623192_1" source="2537" target="2539" cy:directed="1"/>
      <edge id="29655" label="WP_116951408_3 (pp) RPK87717_1" source="2537" target="2538" cy:directed="1"/>
      <edge id="29654" label="WP_129802804_1 (pp) ONI75210_2" source="2536" target="2552" cy:directed="1"/>
      <edge id="29653" label="WP_129802804_1 (pp) WP_086780456_1" source="2536" target="2551" cy:directed="1"/>
      <edge id="29652" label="WP_129802804_1 (pp) WP_055876321_1" source="2536" target="2550" cy:directed="1"/>
      <edge id="29651" label="WP_129802804_1 (pp) WP_125937921_2" source="2536" target="2549" cy:directed="1"/>
      <edge id="29650" label="WP_129802804_1 (pp) WP_081761968_1" source="2536" target="2548" cy:directed="1"/>
      <edge id="29649" label="WP_129802804_1 (pp) WP_096287923_1" source="2536" target="2547" cy:directed="1"/>
      <edge id="29648" label="WP_129802804_1 (pp) WP_090858762_1" source="2536" target="2546" cy:directed="1"/>
      <edge id="29647" label="WP_129802804_1 (pp) WP_115920406_2" source="2536" target="2545" cy:directed="1"/>
      <edge id="29646" label="WP_129802804_1 (pp) ALG08515_1" source="2536" target="2544" cy:directed="1"/>
      <edge id="29645" label="WP_129802804_1 (pp) WP_121830363_1" source="2536" target="2543" cy:directed="1"/>
      <edge id="29644" label="WP_129802804_1 (pp) WP_107004474_1" source="2536" target="2542" cy:directed="1"/>
      <edge id="29643" label="WP_129802804_1 (pp) WP_081907113_1" source="2536" target="2541" cy:directed="1"/>
      <edge id="29642" label="WP_129802804_1 (pp) WP_073876556_1" source="2536" target="2540" cy:directed="1"/>
      <edge id="29641" label="WP_129802804_1 (pp) WP_053623192_1" source="2536" target="2539" cy:directed="1"/>
      <edge id="29640" label="WP_129802804_1 (pp) RPK87717_1" source="2536" target="2538" cy:directed="1"/>
      <edge id="29639" label="WP_129802804_1 (pp) WP_116951408_3" source="2536" target="2537" cy:directed="1"/>
      <edge id="29638" label="EHM27670_1 (pp) ONI75210_2" source="2535" target="2552" cy:directed="1"/>
      <edge id="29637" label="EHM27670_1 (pp) WP_086780456_1" source="2535" target="2551" cy:directed="1"/>
      <edge id="29636" label="EHM27670_1 (pp) WP_055876321_1" source="2535" target="2550" cy:directed="1"/>
      <edge id="29635" label="EHM27670_1 (pp) WP_125937921_2" source="2535" target="2549" cy:directed="1"/>
      <edge id="29634" label="EHM27670_1 (pp) WP_081761968_1" source="2535" target="2548" cy:directed="1"/>
      <edge id="29633" label="EHM27670_1 (pp) WP_096287923_1" source="2535" target="2547" cy:directed="1"/>
      <edge id="29632" label="EHM27670_1 (pp) WP_090858762_1" source="2535" target="2546" cy:directed="1"/>
      <edge id="29631" label="EHM27670_1 (pp) WP_115920406_2" source="2535" target="2545" cy:directed="1"/>
      <edge id="29630" label="EHM27670_1 (pp) ALG08515_1" source="2535" target="2544" cy:directed="1"/>
      <edge id="29629" label="EHM27670_1 (pp) WP_121830363_1" source="2535" target="2543" cy:directed="1"/>
      <edge id="29628" label="EHM27670_1 (pp) WP_107004474_1" source="2535" target="2542" cy:directed="1"/>
      <edge id="29627" label="EHM27670_1 (pp) WP_081907113_1" source="2535" target="2541" cy:directed="1"/>
      <edge id="29626" label="EHM27670_1 (pp) WP_073876556_1" source="2535" target="2540" cy:directed="1"/>
      <edge id="29625" label="EHM27670_1 (pp) WP_053623192_1" source="2535" target="2539" cy:directed="1"/>
      <edge id="29624" label="EHM27670_1 (pp) RPK87717_1" source="2535" target="2538" cy:directed="1"/>
      <edge id="29623" label="EHM27670_1 (pp) WP_116951408_3" source="2535" target="2537" cy:directed="1"/>
      <edge id="29622" label="EHM27670_1 (pp) WP_129802804_1" source="2535" target="2536" cy:directed="1"/>
      <edge id="29621" label="WP_089118023_1 (pp) ONI75210_2" source="2534" target="2552" cy:directed="1"/>
      <edge id="29620" label="WP_089118023_1 (pp) WP_086780456_1" source="2534" target="2551" cy:directed="1"/>
      <edge id="29619" label="WP_089118023_1 (pp) WP_040271779_1" source="2534" target="2553" cy:directed="1"/>
      <edge id="29618" label="WP_089118023_1 (pp) WP_067284698_3" source="2534" target="2533" cy:directed="1"/>
      <edge id="29617" label="WP_089118023_1 (pp) WP_055876321_1" source="2534" target="2550" cy:directed="1"/>
      <edge id="29616" label="WP_089118023_1 (pp) WP_027743449_4" source="2534" target="2532" cy:directed="1"/>
      <edge id="29615" label="WP_089118023_1 (pp) WP_125937921_2" source="2534" target="2549" cy:directed="1"/>
      <edge id="29614" label="WP_089118023_1 (pp) WP_017627596_1" source="2534" target="2531" cy:directed="1"/>
      <edge id="29613" label="WP_089118023_1 (pp) WP_110343524_1" source="2534" target="2530" cy:directed="1"/>
      <edge id="29612" label="WP_089118023_1 (pp) WP_081761968_1" source="2534" target="2548" cy:directed="1"/>
      <edge id="29611" label="WP_089118023_1 (pp) WP_130451801_3" source="2534" target="2529" cy:directed="1"/>
      <edge id="29610" label="WP_089118023_1 (pp) WP_084752844_1" source="2534" target="2528" cy:directed="1"/>
      <edge id="29609" label="WP_089118023_1 (pp) WP_006350677_1" source="2534" target="2527" cy:directed="1"/>
      <edge id="29608" label="WP_089118023_1 (pp) WP_094931980_2" source="2534" target="2526" cy:directed="1"/>
      <edge id="29607" label="WP_089118023_1 (pp) WP_096287923_1" source="2534" target="2547" cy:directed="1"/>
      <edge id="29606" label="WP_089118023_1 (pp) WP_083467034_1" source="2534" target="2525" cy:directed="1"/>
      <edge id="29605" label="WP_089118023_1 (pp) WP_090858762_1" source="2534" target="2546" cy:directed="1"/>
      <edge id="29604" label="WP_089118023_1 (pp) WP_105672644_2" source="2534" target="2524" cy:directed="1"/>
      <edge id="29603" label="WP_089118023_1 (pp) WP_017594221_1" source="2534" target="2523" cy:directed="1"/>
      <edge id="29602" label="WP_089118023_1 (pp) WP_015613007_1" source="2534" target="2522" cy:directed="1"/>
      <edge id="29601" label="WP_089118023_1 (pp) WP_045196822_2" source="2534" target="2521" cy:directed="1"/>
      <edge id="29600" label="WP_089118023_1 (pp) WP_038682890_3" source="2534" target="2520" cy:directed="1"/>
      <edge id="29599" label="WP_089118023_1 (pp) WP_073770697_1" source="2534" target="2519" cy:directed="1"/>
      <edge id="29598" label="WP_089118023_1 (pp) WP_089597075_1" source="2534" target="2518" cy:directed="1"/>
      <edge id="29597" label="WP_089118023_1 (pp) WP_110470681_1" source="2534" target="2517" cy:directed="1"/>
      <edge id="29596" label="WP_089118023_1 (pp) WP_037939130_1" source="2534" target="2516" cy:directed="1"/>
      <edge id="29595" label="WP_089118023_1 (pp) WP_061787600_2" source="2534" target="2515" cy:directed="1"/>
      <edge id="29594" label="WP_089118023_1 (pp) WP_017558654_2" source="2534" target="2514" cy:directed="1"/>
      <edge id="29593" label="WP_089118023_1 (pp) WP_064722319_1" source="2534" target="2513" cy:directed="1"/>
      <edge id="29592" label="WP_089118023_1 (pp) WP_055421506_1" source="2534" target="2512" cy:directed="1"/>
      <edge id="29591" label="WP_089118023_1 (pp) WP_114400345_1" source="2534" target="2511" cy:directed="1"/>
      <edge id="29590" label="WP_089118023_1 (pp) WP_093766414_4" source="2534" target="2510" cy:directed="1"/>
      <edge id="29589" label="WP_089118023_1 (pp) WP_078760898_1" source="2534" target="2509" cy:directed="1"/>
      <edge id="29588" label="WP_089118023_1 (pp) WP_073815370_1" source="2534" target="2508" cy:directed="1"/>
      <edge id="29587" label="WP_089118023_1 (pp) WP_053556805_1" source="2534" target="2507" cy:directed="1"/>
      <edge id="29586" label="WP_089118023_1 (pp) WP_103530696_1" source="2534" target="2506" cy:directed="1"/>
      <edge id="29585" label="WP_089118023_1 (pp) WP_115920406_2" source="2534" target="2545" cy:directed="1"/>
      <edge id="29584" label="WP_089118023_1 (pp) WP_093355673_1" source="2534" target="2505" cy:directed="1"/>
      <edge id="29583" label="WP_089118023_1 (pp) ALG08515_1" source="2534" target="2544" cy:directed="1"/>
      <edge id="29582" label="WP_089118023_1 (pp) OKI12399_1" source="2534" target="2504" cy:directed="1"/>
      <edge id="29581" label="WP_089118023_1 (pp) WP_071934999_2" source="2534" target="2503" cy:directed="1"/>
      <edge id="29580" label="WP_089118023_1 (pp) WP_087767686_1" source="2534" target="2502" cy:directed="1"/>
      <edge id="29579" label="WP_089118023_1 (pp) OQO95173_1" source="2534" target="2501" cy:directed="1"/>
      <edge id="29578" label="WP_089118023_1 (pp) WP_029987712_1" source="2534" target="2500" cy:directed="1"/>
      <edge id="29577" label="WP_089118023_1 (pp) WP_018847808_1" source="2534" target="2499" cy:directed="1"/>
      <edge id="29576" label="WP_089118023_1 (pp) KWX01007_1" source="2534" target="2498" cy:directed="1"/>
      <edge id="29575" label="WP_089118023_1 (pp) WP_075846085_2" source="2534" target="2497" cy:directed="1"/>
      <edge id="29574" label="WP_089118023_1 (pp) WP_123813761_1" source="2534" target="2496" cy:directed="1"/>
      <edge id="29573" label="WP_089118023_1 (pp) OLO29347_1" source="2534" target="2495" cy:directed="1"/>
      <edge id="29572" label="WP_089118023_1 (pp) OKJ27000_1" source="2534" target="2494" cy:directed="1"/>
      <edge id="29571" label="WP_089118023_1 (pp) WP_113689373_1" source="2534" target="2493" cy:directed="1"/>
      <edge id="29570" label="WP_089118023_1 (pp) WP_121830363_1" source="2534" target="2543" cy:directed="1"/>
      <edge id="29569" label="WP_089118023_1 (pp) WP_095752644_1" source="2534" target="2492" cy:directed="1"/>
      <edge id="29568" label="WP_089118023_1 (pp) RLV71217_1" source="2534" target="2491" cy:directed="1"/>
      <edge id="29567" label="WP_089118023_1 (pp) WP_107004474_1" source="2534" target="2542" cy:directed="1"/>
      <edge id="29566" label="WP_089118023_1 (pp) WP_097634704_1" source="2534" target="2490" cy:directed="1"/>
      <edge id="29565" label="WP_089118023_1 (pp) PXY18584_1" source="2534" target="2489" cy:directed="1"/>
      <edge id="29564" label="WP_089118023_1 (pp) WP_083753877_2" source="2534" target="2488" cy:directed="1"/>
      <edge id="29563" label="WP_089118023_1 (pp) WP_109162285_1" source="2534" target="2487" cy:directed="1"/>
      <edge id="29562" label="WP_089118023_1 (pp) KKI16967_3" source="2534" target="2486" cy:directed="1"/>
      <edge id="29561" label="WP_089118023_1 (pp) WP_081907113_1" source="2534" target="2541" cy:directed="1"/>
      <edge id="29560" label="WP_089118023_1 (pp) WP_084252732_3" source="2534" target="2485" cy:directed="1"/>
      <edge id="29559" label="WP_089118023_1 (pp) SJZ81173_1" source="2534" target="2484" cy:directed="1"/>
      <edge id="29558" label="WP_089118023_1 (pp) WP_103467468_1" source="2534" target="2483" cy:directed="1"/>
      <edge id="29557" label="WP_089118023_1 (pp) WP_033300563_1" source="2534" target="2482" cy:directed="1"/>
      <edge id="29556" label="WP_089118023_1 (pp) WP_058632033_1" source="2534" target="2481" cy:directed="1"/>
      <edge id="29555" label="WP_089118023_1 (pp) WP_078612341_1" source="2534" target="2480" cy:directed="1"/>
      <edge id="29554" label="WP_089118023_1 (pp) WP_059008183_2" source="2534" target="2479" cy:directed="1"/>
      <edge id="29553" label="WP_089118023_1 (pp) WP_073876556_1" source="2534" target="2540" cy:directed="1"/>
      <edge id="29552" label="WP_089118023_1 (pp) WP_008409979_1" source="2534" target="2478" cy:directed="1"/>
      <edge id="29551" label="WP_089118023_1 (pp) WP_116112318_1" source="2534" target="2477" cy:directed="1"/>
      <edge id="29550" label="WP_089118023_1 (pp) WP_031002210_2" source="2534" target="2476" cy:directed="1"/>
      <edge id="29549" label="WP_089118023_1 (pp) ALC19908_1" source="2534" target="2475" cy:directed="1"/>
      <edge id="29548" label="WP_089118023_1 (pp) WP_015100718_1" source="2534" target="2474" cy:directed="1"/>
      <edge id="29547" label="WP_089118023_1 (pp) WP_006501818_1" source="2534" target="2473" cy:directed="1"/>
      <edge id="29546" label="WP_089118023_1 (pp) WP_055689909_1" source="2534" target="2472" cy:directed="1"/>
      <edge id="29545" label="WP_089118023_1 (pp) WP_121007506_1" source="2534" target="2471" cy:directed="1"/>
      <edge id="29544" label="WP_089118023_1 (pp) WP_058915320_1" source="2534" target="2470" cy:directed="1"/>
      <edge id="29543" label="WP_089118023_1 (pp) WP_105722094_1" source="2534" target="2469" cy:directed="1"/>
      <edge id="29542" label="WP_089118023_1 (pp) WP_109186559_1" source="2534" target="2468" cy:directed="1"/>
      <edge id="29541" label="WP_089118023_1 (pp) SED75494_1" source="2534" target="2467" cy:directed="1"/>
      <edge id="29540" label="WP_089118023_1 (pp) WP_111250567_1" source="2534" target="2466" cy:directed="1"/>
      <edge id="29539" label="WP_089118023_1 (pp) WP_030143818_1" source="2534" target="2465" cy:directed="1"/>
      <edge id="29538" label="WP_089118023_1 (pp) WP_062924764_1" source="2534" target="2464" cy:directed="1"/>
      <edge id="29537" label="WP_089118023_1 (pp) WP_053623192_1" source="2534" target="2539" cy:directed="1"/>
      <edge id="29536" label="WP_089118023_1 (pp) WP_093655900_5" source="2534" target="2463" cy:directed="1"/>
      <edge id="29535" label="WP_089118023_1 (pp) WP_105527259_1" source="2534" target="2462" cy:directed="1"/>
      <edge id="29534" label="WP_089118023_1 (pp) WP_048574296_1" source="2534" target="2461" cy:directed="1"/>
      <edge id="29533" label="WP_089118023_1 (pp) WP_052852666_2" source="2534" target="2460" cy:directed="1"/>
      <edge id="29532" label="WP_089118023_1 (pp) WP_066976558_1" source="2534" target="2459" cy:directed="1"/>
      <edge id="29531" label="WP_089118023_1 (pp) WP_042167067_1" source="2534" target="2458" cy:directed="1"/>
      <edge id="29530" label="WP_089118023_1 (pp) RPK87717_1" source="2534" target="2538" cy:directed="1"/>
      <edge id="29529" label="WP_089118023_1 (pp) WP_081663146_1" source="2534" target="2457" cy:directed="1"/>
      <edge id="29528" label="WP_089118023_1 (pp) WP_116951408_3" source="2534" target="2537" cy:directed="1"/>
      <edge id="29527" label="WP_089118023_1 (pp) WP_132929859_1" source="2534" target="2456" cy:directed="1"/>
      <edge id="29526" label="WP_089118023_1 (pp) WP_043461231_1" source="2534" target="2455" cy:directed="1"/>
      <edge id="29525" label="WP_089118023_1 (pp) WP_077689962_1" source="2534" target="2454" cy:directed="1"/>
      <edge id="29524" label="WP_089118023_1 (pp) WP_129802804_1" source="2534" target="2536" cy:directed="1"/>
      <edge id="29523" label="WP_089118023_1 (pp) WP_028327189_1" source="2534" target="2453" cy:directed="1"/>
      <edge id="29522" label="WP_089118023_1 (pp) WP_016691947_2" source="2534" target="2452" cy:directed="1"/>
      <edge id="29521" label="WP_089118023_1 (pp) EHM27670_1" source="2534" target="2535" cy:directed="1"/>
      <edge id="29520" label="WP_089118023_1 (pp) WP_070343622_1" source="2534" target="2451" cy:directed="1"/>
      <edge id="29519" label="WP_089118023_1 (pp) OKI46856_1" source="2534" target="2450" cy:directed="1"/>
      <edge id="29518" label="WP_089118023_1 (pp) WP_125509413_1" source="2534" target="2449" cy:directed="1"/>
      <edge id="29517" label="WP_089118023_1 (pp) CEL19833_1" source="2534" target="2448" cy:directed="1"/>
      <edge id="29516" label="WP_089118023_1 (pp) WP_010048307_1" source="2534" target="2447" cy:directed="1"/>
      <edge id="29515" label="WP_089118023_1 (pp) WP_030701973_1" source="2534" target="2446" cy:directed="1"/>
      <edge id="29514" label="WP_089118023_1 (pp) WP_033318793_2" source="2534" target="2445" cy:directed="1"/>
      <edge id="29513" label="WP_089118023_1 (pp) WP_083472659_1" source="2534" target="2444" cy:directed="1"/>
      <edge id="29512" label="WP_089118023_1 (pp) WP_112271410_1" source="2534" target="2443" cy:directed="1"/>
      <edge id="29511" label="WP_067284698_3 (pp) ONI75210_2" source="2533" target="2552" cy:directed="1"/>
      <edge id="29510" label="WP_067284698_3 (pp) WP_086780456_1" source="2533" target="2551" cy:directed="1"/>
      <edge id="29509" label="WP_067284698_3 (pp) WP_040271779_1" source="2533" target="2553" cy:directed="1"/>
      <edge id="29508" label="WP_067284698_3 (pp) WP_055876321_1" source="2533" target="2550" cy:directed="1"/>
      <edge id="29507" label="WP_067284698_3 (pp) WP_125937921_2" source="2533" target="2549" cy:directed="1"/>
      <edge id="29506" label="WP_067284698_3 (pp) WP_081761968_1" source="2533" target="2548" cy:directed="1"/>
      <edge id="29505" label="WP_067284698_3 (pp) WP_096287923_1" source="2533" target="2547" cy:directed="1"/>
      <edge id="29504" label="WP_067284698_3 (pp) WP_090858762_1" source="2533" target="2546" cy:directed="1"/>
      <edge id="29503" label="WP_067284698_3 (pp) WP_115920406_2" source="2533" target="2545" cy:directed="1"/>
      <edge id="29502" label="WP_067284698_3 (pp) ALG08515_1" source="2533" target="2544" cy:directed="1"/>
      <edge id="29501" label="WP_067284698_3 (pp) WP_121830363_1" source="2533" target="2543" cy:directed="1"/>
      <edge id="29500" label="WP_067284698_3 (pp) WP_107004474_1" source="2533" target="2542" cy:directed="1"/>
      <edge id="29499" label="WP_067284698_3 (pp) WP_081907113_1" source="2533" target="2541" cy:directed="1"/>
      <edge id="29498" label="WP_067284698_3 (pp) WP_073876556_1" source="2533" target="2540" cy:directed="1"/>
      <edge id="29497" label="WP_067284698_3 (pp) WP_053623192_1" source="2533" target="2539" cy:directed="1"/>
      <edge id="29496" label="WP_067284698_3 (pp) RPK87717_1" source="2533" target="2538" cy:directed="1"/>
      <edge id="29495" label="WP_067284698_3 (pp) WP_116951408_3" source="2533" target="2537" cy:directed="1"/>
      <edge id="29494" label="WP_067284698_3 (pp) WP_129802804_1" source="2533" target="2536" cy:directed="1"/>
      <edge id="29493" label="WP_067284698_3 (pp) EHM27670_1" source="2533" target="2535" cy:directed="1"/>
      <edge id="29492" label="WP_027743449_4 (pp) ONI75210_2" source="2532" target="2552" cy:directed="1"/>
      <edge id="29491" label="WP_027743449_4 (pp) WP_086780456_1" source="2532" target="2551" cy:directed="1"/>
      <edge id="29490" label="WP_027743449_4 (pp) WP_040271779_1" source="2532" target="2553" cy:directed="1"/>
      <edge id="29489" label="WP_027743449_4 (pp) WP_067284698_3" source="2532" target="2533" cy:directed="1"/>
      <edge id="29488" label="WP_027743449_4 (pp) WP_055876321_1" source="2532" target="2550" cy:directed="1"/>
      <edge id="29487" label="WP_027743449_4 (pp) WP_125937921_2" source="2532" target="2549" cy:directed="1"/>
      <edge id="29486" label="WP_027743449_4 (pp) WP_110343524_1" source="2532" target="2530" cy:directed="1"/>
      <edge id="29485" label="WP_027743449_4 (pp) WP_081761968_1" source="2532" target="2548" cy:directed="1"/>
      <edge id="29484" label="WP_027743449_4 (pp) WP_130451801_3" source="2532" target="2529" cy:directed="1"/>
      <edge id="29483" label="WP_027743449_4 (pp) WP_084752844_1" source="2532" target="2528" cy:directed="1"/>
      <edge id="29482" label="WP_027743449_4 (pp) WP_096287923_1" source="2532" target="2547" cy:directed="1"/>
      <edge id="29481" label="WP_027743449_4 (pp) WP_090858762_1" source="2532" target="2546" cy:directed="1"/>
      <edge id="29480" label="WP_027743449_4 (pp) WP_017594221_1" source="2532" target="2523" cy:directed="1"/>
      <edge id="29479" label="WP_027743449_4 (pp) WP_110470681_1" source="2532" target="2517" cy:directed="1"/>
      <edge id="29478" label="WP_027743449_4 (pp) WP_037939130_1" source="2532" target="2516" cy:directed="1"/>
      <edge id="29477" label="WP_027743449_4 (pp) WP_114400345_1" source="2532" target="2511" cy:directed="1"/>
      <edge id="29476" label="WP_027743449_4 (pp) WP_078760898_1" source="2532" target="2509" cy:directed="1"/>
      <edge id="29475" label="WP_027743449_4 (pp) WP_053556805_1" source="2532" target="2507" cy:directed="1"/>
      <edge id="29474" label="WP_027743449_4 (pp) WP_115920406_2" source="2532" target="2545" cy:directed="1"/>
      <edge id="29473" label="WP_027743449_4 (pp) WP_093355673_1" source="2532" target="2505" cy:directed="1"/>
      <edge id="29472" label="WP_027743449_4 (pp) ALG08515_1" source="2532" target="2544" cy:directed="1"/>
      <edge id="29471" label="WP_027743449_4 (pp) WP_087767686_1" source="2532" target="2502" cy:directed="1"/>
      <edge id="29470" label="WP_027743449_4 (pp) OQO95173_1" source="2532" target="2501" cy:directed="1"/>
      <edge id="29469" label="WP_027743449_4 (pp) OLO29347_1" source="2532" target="2495" cy:directed="1"/>
      <edge id="29468" label="WP_027743449_4 (pp) WP_123813761_1" source="2532" target="2496" cy:directed="1"/>
      <edge id="29467" label="WP_027743449_4 (pp) WP_121830363_1" source="2532" target="2543" cy:directed="1"/>
      <edge id="29466" label="WP_027743449_4 (pp) WP_107004474_1" source="2532" target="2542" cy:directed="1"/>
      <edge id="29465" label="WP_027743449_4 (pp) WP_097634704_1" source="2532" target="2490" cy:directed="1"/>
      <edge id="29464" label="WP_027743449_4 (pp) WP_081907113_1" source="2532" target="2541" cy:directed="1"/>
      <edge id="29463" label="WP_027743449_4 (pp) WP_084252732_3" source="2532" target="2485" cy:directed="1"/>
      <edge id="29462" label="WP_027743449_4 (pp) WP_059008183_2" source="2532" target="2479" cy:directed="1"/>
      <edge id="29461" label="WP_027743449_4 (pp) WP_008409979_1" source="2532" target="2478" cy:directed="1"/>
      <edge id="29460" label="WP_027743449_4 (pp) WP_073876556_1" source="2532" target="2540" cy:directed="1"/>
      <edge id="29459" label="WP_027743449_4 (pp) WP_116112318_1" source="2532" target="2477" cy:directed="1"/>
      <edge id="29458" label="WP_027743449_4 (pp) WP_031002210_2" source="2532" target="2476" cy:directed="1"/>
      <edge id="29457" label="WP_027743449_4 (pp) WP_015100718_1" source="2532" target="2474" cy:directed="1"/>
      <edge id="29456" label="WP_027743449_4 (pp) WP_006501818_1" source="2532" target="2473" cy:directed="1"/>
      <edge id="29455" label="WP_027743449_4 (pp) WP_111250567_1" source="2532" target="2466" cy:directed="1"/>
      <edge id="29454" label="WP_027743449_4 (pp) WP_053623192_1" source="2532" target="2539" cy:directed="1"/>
      <edge id="29453" label="WP_027743449_4 (pp) WP_105527259_1" source="2532" target="2462" cy:directed="1"/>
      <edge id="29452" label="WP_027743449_4 (pp) WP_052852666_2" source="2532" target="2460" cy:directed="1"/>
      <edge id="29451" label="WP_027743449_4 (pp) WP_048574296_1" source="2532" target="2461" cy:directed="1"/>
      <edge id="29450" label="WP_027743449_4 (pp) WP_066976558_1" source="2532" target="2459" cy:directed="1"/>
      <edge id="29449" label="WP_027743449_4 (pp) RPK87717_1" source="2532" target="2538" cy:directed="1"/>
      <edge id="29448" label="WP_027743449_4 (pp) WP_081663146_1" source="2532" target="2457" cy:directed="1"/>
      <edge id="29447" label="WP_027743449_4 (pp) WP_116951408_3" source="2532" target="2537" cy:directed="1"/>
      <edge id="29446" label="WP_027743449_4 (pp) WP_077689962_1" source="2532" target="2454" cy:directed="1"/>
      <edge id="29445" label="WP_027743449_4 (pp) WP_129802804_1" source="2532" target="2536" cy:directed="1"/>
      <edge id="29444" label="WP_027743449_4 (pp) EHM27670_1" source="2532" target="2535" cy:directed="1"/>
      <edge id="29443" label="WP_027743449_4 (pp) WP_010048307_1" source="2532" target="2447" cy:directed="1"/>
      <edge id="29442" label="WP_027743449_4 (pp) WP_030701973_1" source="2532" target="2446" cy:directed="1"/>
      <edge id="29441" label="WP_027743449_4 (pp) WP_033318793_2" source="2532" target="2445" cy:directed="1"/>
      <edge id="29440" label="WP_027743449_4 (pp) WP_112271410_1" source="2532" target="2443" cy:directed="1"/>
      <edge id="29439" label="WP_017627596_1 (pp) ONI75210_2" source="2531" target="2552" cy:directed="1"/>
      <edge id="29438" label="WP_017627596_1 (pp) WP_086780456_1" source="2531" target="2551" cy:directed="1"/>
      <edge id="29437" label="WP_017627596_1 (pp) WP_040271779_1" source="2531" target="2553" cy:directed="1"/>
      <edge id="29436" label="WP_017627596_1 (pp) WP_067284698_3" source="2531" target="2533" cy:directed="1"/>
      <edge id="29435" label="WP_017627596_1 (pp) WP_027743449_4" source="2531" target="2532" cy:directed="1"/>
      <edge id="29434" label="WP_017627596_1 (pp) WP_055876321_1" source="2531" target="2550" cy:directed="1"/>
      <edge id="29433" label="WP_017627596_1 (pp) WP_125937921_2" source="2531" target="2549" cy:directed="1"/>
      <edge id="29432" label="WP_017627596_1 (pp) WP_110343524_1" source="2531" target="2530" cy:directed="1"/>
      <edge id="29431" label="WP_017627596_1 (pp) WP_081761968_1" source="2531" target="2548" cy:directed="1"/>
      <edge id="29430" label="WP_017627596_1 (pp) WP_130451801_3" source="2531" target="2529" cy:directed="1"/>
      <edge id="29429" label="WP_017627596_1 (pp) WP_084752844_1" source="2531" target="2528" cy:directed="1"/>
      <edge id="29428" label="WP_017627596_1 (pp) WP_006350677_1" source="2531" target="2527" cy:directed="1"/>
      <edge id="29427" label="WP_017627596_1 (pp) WP_096287923_1" source="2531" target="2547" cy:directed="1"/>
      <edge id="29426" label="WP_017627596_1 (pp) WP_083467034_1" source="2531" target="2525" cy:directed="1"/>
      <edge id="29425" label="WP_017627596_1 (pp) WP_090858762_1" source="2531" target="2546" cy:directed="1"/>
      <edge id="29424" label="WP_017627596_1 (pp) WP_105672644_2" source="2531" target="2524" cy:directed="1"/>
      <edge id="29423" label="WP_017627596_1 (pp) WP_017594221_1" source="2531" target="2523" cy:directed="1"/>
      <edge id="29422" label="WP_017627596_1 (pp) WP_015613007_1" source="2531" target="2522" cy:directed="1"/>
      <edge id="29421" label="WP_017627596_1 (pp) WP_045196822_2" source="2531" target="2521" cy:directed="1"/>
      <edge id="29420" label="WP_017627596_1 (pp) WP_038682890_3" source="2531" target="2520" cy:directed="1"/>
      <edge id="29419" label="WP_017627596_1 (pp) WP_037939130_1" source="2531" target="2516" cy:directed="1"/>
      <edge id="29418" label="WP_017627596_1 (pp) WP_064722319_1" source="2531" target="2513" cy:directed="1"/>
      <edge id="29417" label="WP_017627596_1 (pp) WP_093766414_4" source="2531" target="2510" cy:directed="1"/>
      <edge id="29416" label="WP_017627596_1 (pp) WP_114400345_1" source="2531" target="2511" cy:directed="1"/>
      <edge id="29415" label="WP_017627596_1 (pp) WP_078760898_1" source="2531" target="2509" cy:directed="1"/>
      <edge id="29414" label="WP_017627596_1 (pp) WP_073815370_1" source="2531" target="2508" cy:directed="1"/>
      <edge id="29413" label="WP_017627596_1 (pp) WP_053556805_1" source="2531" target="2507" cy:directed="1"/>
      <edge id="29412" label="WP_017627596_1 (pp) WP_115920406_2" source="2531" target="2545" cy:directed="1"/>
      <edge id="29411" label="WP_017627596_1 (pp) WP_093355673_1" source="2531" target="2505" cy:directed="1"/>
      <edge id="29410" label="WP_017627596_1 (pp) ALE78105_1" source="2531" target="2383" cy:directed="1"/>
      <edge id="29409" label="WP_017627596_1 (pp) ALG08515_1" source="2531" target="2544" cy:directed="1"/>
      <edge id="29408" label="WP_017627596_1 (pp) WP_071934999_2" source="2531" target="2503" cy:directed="1"/>
      <edge id="29407" label="WP_017627596_1 (pp) WP_087767686_1" source="2531" target="2502" cy:directed="1"/>
      <edge id="29406" label="WP_017627596_1 (pp) OQO95173_1" source="2531" target="2501" cy:directed="1"/>
      <edge id="29405" label="WP_017627596_1 (pp) WP_029987712_1" source="2531" target="2500" cy:directed="1"/>
      <edge id="29404" label="WP_017627596_1 (pp) WP_018847808_1" source="2531" target="2499" cy:directed="1"/>
      <edge id="29403" label="WP_017627596_1 (pp) KWX01007_1" source="2531" target="2498" cy:directed="1"/>
      <edge id="29402" label="WP_017627596_1 (pp) OLO29347_1" source="2531" target="2495" cy:directed="1"/>
      <edge id="29401" label="WP_017627596_1 (pp) WP_123813761_1" source="2531" target="2496" cy:directed="1"/>
      <edge id="29400" label="WP_017627596_1 (pp) WP_113689373_1" source="2531" target="2493" cy:directed="1"/>
      <edge id="29399" label="WP_017627596_1 (pp) WP_121830363_1" source="2531" target="2543" cy:directed="1"/>
      <edge id="29398" label="WP_017627596_1 (pp) RLV71217_1" source="2531" target="2491" cy:directed="1"/>
      <edge id="29397" label="WP_017627596_1 (pp) WP_097634704_1" source="2531" target="2490" cy:directed="1"/>
      <edge id="29396" label="WP_017627596_1 (pp) WP_107004474_1" source="2531" target="2542" cy:directed="1"/>
      <edge id="29395" label="WP_017627596_1 (pp) PXY18584_1" source="2531" target="2489" cy:directed="1"/>
      <edge id="29394" label="WP_017627596_1 (pp) WP_083753877_2" source="2531" target="2488" cy:directed="1"/>
      <edge id="29393" label="WP_017627596_1 (pp) WP_109162285_1" source="2531" target="2487" cy:directed="1"/>
      <edge id="29392" label="WP_017627596_1 (pp) WP_081907113_1" source="2531" target="2541" cy:directed="1"/>
      <edge id="29391" label="WP_017627596_1 (pp) WP_084252732_3" source="2531" target="2485" cy:directed="1"/>
      <edge id="29390" label="WP_017627596_1 (pp) SJZ81173_1" source="2531" target="2484" cy:directed="1"/>
      <edge id="29389" label="WP_017627596_1 (pp) WP_103467468_1" source="2531" target="2483" cy:directed="1"/>
      <edge id="29388" label="WP_017627596_1 (pp) WP_033300563_1" source="2531" target="2482" cy:directed="1"/>
      <edge id="29387" label="WP_017627596_1 (pp) WP_078612341_1" source="2531" target="2480" cy:directed="1"/>
      <edge id="29386" label="WP_017627596_1 (pp) WP_059008183_2" source="2531" target="2479" cy:directed="1"/>
      <edge id="29385" label="WP_017627596_1 (pp) WP_073876556_1" source="2531" target="2540" cy:directed="1"/>
      <edge id="29384" label="WP_017627596_1 (pp) WP_008409979_1" source="2531" target="2478" cy:directed="1"/>
      <edge id="29383" label="WP_017627596_1 (pp) WP_116112318_1" source="2531" target="2477" cy:directed="1"/>
      <edge id="29382" label="WP_017627596_1 (pp) WP_031002210_2" source="2531" target="2476" cy:directed="1"/>
      <edge id="29381" label="WP_017627596_1 (pp) ALC19908_1" source="2531" target="2475" cy:directed="1"/>
      <edge id="29380" label="WP_017627596_1 (pp) WP_015100718_1" source="2531" target="2474" cy:directed="1"/>
      <edge id="29379" label="WP_017627596_1 (pp) WP_006501818_1" source="2531" target="2473" cy:directed="1"/>
      <edge id="29378" label="WP_017627596_1 (pp) WP_055689909_1" source="2531" target="2472" cy:directed="1"/>
      <edge id="29377" label="WP_017627596_1 (pp) WP_105722094_1" source="2531" target="2469" cy:directed="1"/>
      <edge id="29376" label="WP_017627596_1 (pp) WP_109186559_1" source="2531" target="2468" cy:directed="1"/>
      <edge id="29375" label="WP_017627596_1 (pp) SED75494_1" source="2531" target="2467" cy:directed="1"/>
      <edge id="29374" label="WP_017627596_1 (pp) WP_111250567_1" source="2531" target="2466" cy:directed="1"/>
      <edge id="29373" label="WP_017627596_1 (pp) WP_053623192_1" source="2531" target="2539" cy:directed="1"/>
      <edge id="29372" label="WP_017627596_1 (pp) WP_062924764_1" source="2531" target="2464" cy:directed="1"/>
      <edge id="29371" label="WP_017627596_1 (pp) WP_105527259_1" source="2531" target="2462" cy:directed="1"/>
      <edge id="29370" label="WP_017627596_1 (pp) WP_052852666_2" source="2531" target="2460" cy:directed="1"/>
      <edge id="29369" label="WP_017627596_1 (pp) WP_048574296_1" source="2531" target="2461" cy:directed="1"/>
      <edge id="29368" label="WP_017627596_1 (pp) WP_066976558_1" source="2531" target="2459" cy:directed="1"/>
      <edge id="29367" label="WP_017627596_1 (pp) RPK87717_1" source="2531" target="2538" cy:directed="1"/>
      <edge id="29366" label="WP_017627596_1 (pp) WP_081663146_1" source="2531" target="2457" cy:directed="1"/>
      <edge id="29365" label="WP_017627596_1 (pp) WP_116951408_3" source="2531" target="2537" cy:directed="1"/>
      <edge id="29364" label="WP_017627596_1 (pp) WP_077689962_1" source="2531" target="2454" cy:directed="1"/>
      <edge id="29363" label="WP_017627596_1 (pp) WP_129802804_1" source="2531" target="2536" cy:directed="1"/>
      <edge id="29362" label="WP_017627596_1 (pp) WP_028327189_1" source="2531" target="2453" cy:directed="1"/>
      <edge id="29361" label="WP_017627596_1 (pp) EHM27670_1" source="2531" target="2535" cy:directed="1"/>
      <edge id="29360" label="WP_017627596_1 (pp) WP_070343622_1" source="2531" target="2451" cy:directed="1"/>
      <edge id="29359" label="WP_017627596_1 (pp) OKI46856_1" source="2531" target="2450" cy:directed="1"/>
      <edge id="29358" label="WP_017627596_1 (pp) WP_125509413_1" source="2531" target="2449" cy:directed="1"/>
      <edge id="29357" label="WP_017627596_1 (pp) WP_010048307_1" source="2531" target="2447" cy:directed="1"/>
      <edge id="29356" label="WP_017627596_1 (pp) WP_030701973_1" source="2531" target="2446" cy:directed="1"/>
      <edge id="29355" label="WP_017627596_1 (pp) WP_033318793_2" source="2531" target="2445" cy:directed="1"/>
      <edge id="29354" label="WP_017627596_1 (pp) WP_112271410_1" source="2531" target="2443" cy:directed="1"/>
      <edge id="29353" label="WP_110343524_1 (pp) ONI75210_2" source="2530" target="2552" cy:directed="1"/>
      <edge id="29352" label="WP_110343524_1 (pp) WP_086780456_1" source="2530" target="2551" cy:directed="1"/>
      <edge id="29351" label="WP_110343524_1 (pp) WP_040271779_1" source="2530" target="2553" cy:directed="1"/>
      <edge id="29350" label="WP_110343524_1 (pp) WP_067284698_3" source="2530" target="2533" cy:directed="1"/>
      <edge id="29349" label="WP_110343524_1 (pp) WP_055876321_1" source="2530" target="2550" cy:directed="1"/>
      <edge id="29348" label="WP_110343524_1 (pp) WP_125937921_2" source="2530" target="2549" cy:directed="1"/>
      <edge id="29347" label="WP_110343524_1 (pp) WP_081761968_1" source="2530" target="2548" cy:directed="1"/>
      <edge id="29346" label="WP_110343524_1 (pp) WP_130451801_3" source="2530" target="2529" cy:directed="1"/>
      <edge id="29345" label="WP_110343524_1 (pp) WP_096287923_1" source="2530" target="2547" cy:directed="1"/>
      <edge id="29344" label="WP_110343524_1 (pp) WP_090858762_1" source="2530" target="2546" cy:directed="1"/>
      <edge id="29343" label="WP_110343524_1 (pp) WP_017594221_1" source="2530" target="2523" cy:directed="1"/>
      <edge id="29342" label="WP_110343524_1 (pp) WP_037939130_1" source="2530" target="2516" cy:directed="1"/>
      <edge id="29341" label="WP_110343524_1 (pp) WP_061787600_2" source="2530" target="2515" cy:directed="1"/>
      <edge id="29340" label="WP_110343524_1 (pp) WP_114400345_1" source="2530" target="2511" cy:directed="1"/>
      <edge id="29339" label="WP_110343524_1 (pp) WP_078760898_1" source="2530" target="2509" cy:directed="1"/>
      <edge id="29338" label="WP_110343524_1 (pp) WP_053556805_1" source="2530" target="2507" cy:directed="1"/>
      <edge id="29337" label="WP_110343524_1 (pp) WP_115920406_2" source="2530" target="2545" cy:directed="1"/>
      <edge id="29336" label="WP_110343524_1 (pp) WP_093355673_1" source="2530" target="2505" cy:directed="1"/>
      <edge id="29335" label="WP_110343524_1 (pp) ALG08515_1" source="2530" target="2544" cy:directed="1"/>
      <edge id="29334" label="WP_110343524_1 (pp) OQO95173_1" source="2530" target="2501" cy:directed="1"/>
      <edge id="29333" label="WP_110343524_1 (pp) WP_123813761_1" source="2530" target="2496" cy:directed="1"/>
      <edge id="29332" label="WP_110343524_1 (pp) WP_121830363_1" source="2530" target="2543" cy:directed="1"/>
      <edge id="29331" label="WP_110343524_1 (pp) WP_107004474_1" source="2530" target="2542" cy:directed="1"/>
      <edge id="29330" label="WP_110343524_1 (pp) WP_081907113_1" source="2530" target="2541" cy:directed="1"/>
      <edge id="29329" label="WP_110343524_1 (pp) WP_084252732_3" source="2530" target="2485" cy:directed="1"/>
      <edge id="29328" label="WP_110343524_1 (pp) WP_073876556_1" source="2530" target="2540" cy:directed="1"/>
      <edge id="29327" label="WP_110343524_1 (pp) WP_031002210_2" source="2530" target="2476" cy:directed="1"/>
      <edge id="29326" label="WP_110343524_1 (pp) WP_006501818_1" source="2530" target="2473" cy:directed="1"/>
      <edge id="29325" label="WP_110343524_1 (pp) WP_053623192_1" source="2530" target="2539" cy:directed="1"/>
      <edge id="29324" label="WP_110343524_1 (pp) WP_048574296_1" source="2530" target="2461" cy:directed="1"/>
      <edge id="29323" label="WP_110343524_1 (pp) WP_066976558_1" source="2530" target="2459" cy:directed="1"/>
      <edge id="29322" label="WP_110343524_1 (pp) RPK87717_1" source="2530" target="2538" cy:directed="1"/>
      <edge id="29321" label="WP_110343524_1 (pp) WP_081663146_1" source="2530" target="2457" cy:directed="1"/>
      <edge id="29320" label="WP_110343524_1 (pp) WP_116951408_3" source="2530" target="2537" cy:directed="1"/>
      <edge id="29319" label="WP_110343524_1 (pp) WP_129802804_1" source="2530" target="2536" cy:directed="1"/>
      <edge id="29318" label="WP_110343524_1 (pp) EHM27670_1" source="2530" target="2535" cy:directed="1"/>
      <edge id="29317" label="WP_110343524_1 (pp) WP_033318793_2" source="2530" target="2445" cy:directed="1"/>
      <edge id="29316" label="WP_130451801_3 (pp) ONI75210_2" source="2529" target="2552" cy:directed="1"/>
      <edge id="29315" label="WP_130451801_3 (pp) WP_086780456_1" source="2529" target="2551" cy:directed="1"/>
      <edge id="29314" label="WP_130451801_3 (pp) WP_040271779_1" source="2529" target="2553" cy:directed="1"/>
      <edge id="29313" label="WP_130451801_3 (pp) WP_067284698_3" source="2529" target="2533" cy:directed="1"/>
      <edge id="29312" label="WP_130451801_3 (pp) WP_055876321_1" source="2529" target="2550" cy:directed="1"/>
      <edge id="29311" label="WP_130451801_3 (pp) WP_125937921_2" source="2529" target="2549" cy:directed="1"/>
      <edge id="29310" label="WP_130451801_3 (pp) WP_081761968_1" source="2529" target="2548" cy:directed="1"/>
      <edge id="29309" label="WP_130451801_3 (pp) WP_096287923_1" source="2529" target="2547" cy:directed="1"/>
      <edge id="29308" label="WP_130451801_3 (pp) WP_090858762_1" source="2529" target="2546" cy:directed="1"/>
      <edge id="29307" label="WP_130451801_3 (pp) WP_115920406_2" source="2529" target="2545" cy:directed="1"/>
      <edge id="29306" label="WP_130451801_3 (pp) ALG08515_1" source="2529" target="2544" cy:directed="1"/>
      <edge id="29305" label="WP_130451801_3 (pp) WP_121830363_1" source="2529" target="2543" cy:directed="1"/>
      <edge id="29304" label="WP_130451801_3 (pp) WP_107004474_1" source="2529" target="2542" cy:directed="1"/>
      <edge id="29303" label="WP_130451801_3 (pp) WP_081907113_1" source="2529" target="2541" cy:directed="1"/>
      <edge id="29302" label="WP_130451801_3 (pp) WP_073876556_1" source="2529" target="2540" cy:directed="1"/>
      <edge id="29301" label="WP_130451801_3 (pp) WP_053623192_1" source="2529" target="2539" cy:directed="1"/>
      <edge id="29300" label="WP_130451801_3 (pp) RPK87717_1" source="2529" target="2538" cy:directed="1"/>
      <edge id="29299" label="WP_130451801_3 (pp) WP_116951408_3" source="2529" target="2537" cy:directed="1"/>
      <edge id="29298" label="WP_130451801_3 (pp) WP_129802804_1" source="2529" target="2536" cy:directed="1"/>
      <edge id="29297" label="WP_130451801_3 (pp) EHM27670_1" source="2529" target="2535" cy:directed="1"/>
      <edge id="29296" label="WP_084752844_1 (pp) ONI75210_2" source="2528" target="2552" cy:directed="1"/>
      <edge id="29295" label="WP_084752844_1 (pp) WP_086780456_1" source="2528" target="2551" cy:directed="1"/>
      <edge id="29294" label="WP_084752844_1 (pp) WP_040271779_1" source="2528" target="2553" cy:directed="1"/>
      <edge id="29293" label="WP_084752844_1 (pp) WP_067284698_3" source="2528" target="2533" cy:directed="1"/>
      <edge id="29292" label="WP_084752844_1 (pp) WP_055876321_1" source="2528" target="2550" cy:directed="1"/>
      <edge id="29291" label="WP_084752844_1 (pp) WP_125937921_2" source="2528" target="2549" cy:directed="1"/>
      <edge id="29290" label="WP_084752844_1 (pp) WP_110343524_1" source="2528" target="2530" cy:directed="1"/>
      <edge id="29289" label="WP_084752844_1 (pp) WP_081761968_1" source="2528" target="2548" cy:directed="1"/>
      <edge id="29288" label="WP_084752844_1 (pp) WP_130451801_3" source="2528" target="2529" cy:directed="1"/>
      <edge id="29287" label="WP_084752844_1 (pp) WP_096287923_1" source="2528" target="2547" cy:directed="1"/>
      <edge id="29286" label="WP_084752844_1 (pp) WP_090858762_1" source="2528" target="2546" cy:directed="1"/>
      <edge id="29285" label="WP_084752844_1 (pp) WP_017594221_1" source="2528" target="2523" cy:directed="1"/>
      <edge id="29284" label="WP_084752844_1 (pp) WP_037939130_1" source="2528" target="2516" cy:directed="1"/>
      <edge id="29283" label="WP_084752844_1 (pp) WP_114400345_1" source="2528" target="2511" cy:directed="1"/>
      <edge id="29282" label="WP_084752844_1 (pp) WP_078760898_1" source="2528" target="2509" cy:directed="1"/>
      <edge id="29281" label="WP_084752844_1 (pp) WP_053556805_1" source="2528" target="2507" cy:directed="1"/>
      <edge id="29280" label="WP_084752844_1 (pp) WP_115920406_2" source="2528" target="2545" cy:directed="1"/>
      <edge id="29279" label="WP_084752844_1 (pp) WP_093355673_1" source="2528" target="2505" cy:directed="1"/>
      <edge id="29278" label="WP_084752844_1 (pp) ALG08515_1" source="2528" target="2544" cy:directed="1"/>
      <edge id="29277" label="WP_084752844_1 (pp) OQO95173_1" source="2528" target="2501" cy:directed="1"/>
      <edge id="29276" label="WP_084752844_1 (pp) WP_123813761_1" source="2528" target="2496" cy:directed="1"/>
      <edge id="29275" label="WP_084752844_1 (pp) WP_121830363_1" source="2528" target="2543" cy:directed="1"/>
      <edge id="29274" label="WP_084752844_1 (pp) WP_107004474_1" source="2528" target="2542" cy:directed="1"/>
      <edge id="29273" label="WP_084752844_1 (pp) WP_081907113_1" source="2528" target="2541" cy:directed="1"/>
      <edge id="29272" label="WP_084752844_1 (pp) WP_084252732_3" source="2528" target="2485" cy:directed="1"/>
      <edge id="29271" label="WP_084752844_1 (pp) WP_073876556_1" source="2528" target="2540" cy:directed="1"/>
      <edge id="29270" label="WP_084752844_1 (pp) WP_031002210_2" source="2528" target="2476" cy:directed="1"/>
      <edge id="29269" label="WP_084752844_1 (pp) WP_006501818_1" source="2528" target="2473" cy:directed="1"/>
      <edge id="29268" label="WP_084752844_1 (pp) WP_053623192_1" source="2528" target="2539" cy:directed="1"/>
      <edge id="29267" label="WP_084752844_1 (pp) WP_048574296_1" source="2528" target="2461" cy:directed="1"/>
      <edge id="29266" label="WP_084752844_1 (pp) WP_066976558_1" source="2528" target="2459" cy:directed="1"/>
      <edge id="29265" label="WP_084752844_1 (pp) RPK87717_1" source="2528" target="2538" cy:directed="1"/>
      <edge id="29264" label="WP_084752844_1 (pp) WP_081663146_1" source="2528" target="2457" cy:directed="1"/>
      <edge id="29263" label="WP_084752844_1 (pp) WP_116951408_3" source="2528" target="2537" cy:directed="1"/>
      <edge id="29262" label="WP_084752844_1 (pp) WP_129802804_1" source="2528" target="2536" cy:directed="1"/>
      <edge id="29261" label="WP_084752844_1 (pp) EHM27670_1" source="2528" target="2535" cy:directed="1"/>
      <edge id="29260" label="WP_084752844_1 (pp) WP_033318793_2" source="2528" target="2445" cy:directed="1"/>
      <edge id="29259" label="WP_006350677_1 (pp) ONI75210_2" source="2527" target="2552" cy:directed="1"/>
      <edge id="29258" label="WP_006350677_1 (pp) WP_086780456_1" source="2527" target="2551" cy:directed="1"/>
      <edge id="29257" label="WP_006350677_1 (pp) WP_040271779_1" source="2527" target="2553" cy:directed="1"/>
      <edge id="29256" label="WP_006350677_1 (pp) WP_067284698_3" source="2527" target="2533" cy:directed="1"/>
      <edge id="29255" label="WP_006350677_1 (pp) WP_055876321_1" source="2527" target="2550" cy:directed="1"/>
      <edge id="29254" label="WP_006350677_1 (pp) WP_027743449_4" source="2527" target="2532" cy:directed="1"/>
      <edge id="29253" label="WP_006350677_1 (pp) WP_125937921_2" source="2527" target="2549" cy:directed="1"/>
      <edge id="29252" label="WP_006350677_1 (pp) WP_110343524_1" source="2527" target="2530" cy:directed="1"/>
      <edge id="29251" label="WP_006350677_1 (pp) WP_081761968_1" source="2527" target="2548" cy:directed="1"/>
      <edge id="29250" label="WP_006350677_1 (pp) WP_130451801_3" source="2527" target="2529" cy:directed="1"/>
      <edge id="29249" label="WP_006350677_1 (pp) WP_084752844_1" source="2527" target="2528" cy:directed="1"/>
      <edge id="29248" label="WP_006350677_1 (pp) WP_096287923_1" source="2527" target="2547" cy:directed="1"/>
      <edge id="29247" label="WP_006350677_1 (pp) WP_090858762_1" source="2527" target="2546" cy:directed="1"/>
      <edge id="29246" label="WP_006350677_1 (pp) WP_105672644_2" source="2527" target="2524" cy:directed="1"/>
      <edge id="29245" label="WP_006350677_1 (pp) WP_017594221_1" source="2527" target="2523" cy:directed="1"/>
      <edge id="29244" label="WP_006350677_1 (pp) WP_110470681_1" source="2527" target="2517" cy:directed="1"/>
      <edge id="29243" label="WP_006350677_1 (pp) WP_037939130_1" source="2527" target="2516" cy:directed="1"/>
      <edge id="29242" label="WP_006350677_1 (pp) WP_114400345_1" source="2527" target="2511" cy:directed="1"/>
      <edge id="29241" label="WP_006350677_1 (pp) WP_078760898_1" source="2527" target="2509" cy:directed="1"/>
      <edge id="29240" label="WP_006350677_1 (pp) WP_053556805_1" source="2527" target="2507" cy:directed="1"/>
      <edge id="29239" label="WP_006350677_1 (pp) WP_115920406_2" source="2527" target="2545" cy:directed="1"/>
      <edge id="29238" label="WP_006350677_1 (pp) WP_093355673_1" source="2527" target="2505" cy:directed="1"/>
      <edge id="29237" label="WP_006350677_1 (pp) ALE78105_1" source="2527" target="2383" cy:directed="1"/>
      <edge id="29236" label="WP_006350677_1 (pp) ALG08515_1" source="2527" target="2544" cy:directed="1"/>
      <edge id="29235" label="WP_006350677_1 (pp) WP_087767686_1" source="2527" target="2502" cy:directed="1"/>
      <edge id="29234" label="WP_006350677_1 (pp) OQO95173_1" source="2527" target="2501" cy:directed="1"/>
      <edge id="29233" label="WP_006350677_1 (pp) OLO29347_1" source="2527" target="2495" cy:directed="1"/>
      <edge id="29232" label="WP_006350677_1 (pp) WP_123813761_1" source="2527" target="2496" cy:directed="1"/>
      <edge id="29231" label="WP_006350677_1 (pp) WP_121830363_1" source="2527" target="2543" cy:directed="1"/>
      <edge id="29230" label="WP_006350677_1 (pp) WP_107004474_1" source="2527" target="2542" cy:directed="1"/>
      <edge id="29229" label="WP_006350677_1 (pp) WP_097634704_1" source="2527" target="2490" cy:directed="1"/>
      <edge id="29228" label="WP_006350677_1 (pp) WP_081907113_1" source="2527" target="2541" cy:directed="1"/>
      <edge id="29227" label="WP_006350677_1 (pp) WP_084252732_3" source="2527" target="2485" cy:directed="1"/>
      <edge id="29226" label="WP_006350677_1 (pp) WP_059008183_2" source="2527" target="2479" cy:directed="1"/>
      <edge id="29225" label="WP_006350677_1 (pp) WP_073876556_1" source="2527" target="2540" cy:directed="1"/>
      <edge id="29224" label="WP_006350677_1 (pp) WP_008409979_1" source="2527" target="2478" cy:directed="1"/>
      <edge id="29223" label="WP_006350677_1 (pp) WP_116112318_1" source="2527" target="2477" cy:directed="1"/>
      <edge id="29222" label="WP_006350677_1 (pp) WP_031002210_2" source="2527" target="2476" cy:directed="1"/>
      <edge id="29221" label="WP_006350677_1 (pp) WP_015100718_1" source="2527" target="2474" cy:directed="1"/>
      <edge id="29220" label="WP_006350677_1 (pp) WP_006501818_1" source="2527" target="2473" cy:directed="1"/>
      <edge id="29219" label="WP_006350677_1 (pp) WP_111250567_1" source="2527" target="2466" cy:directed="1"/>
      <edge id="29218" label="WP_006350677_1 (pp) WP_053623192_1" source="2527" target="2539" cy:directed="1"/>
      <edge id="29217" label="WP_006350677_1 (pp) WP_105527259_1" source="2527" target="2462" cy:directed="1"/>
      <edge id="29216" label="WP_006350677_1 (pp) WP_052852666_2" source="2527" target="2460" cy:directed="1"/>
      <edge id="29215" label="WP_006350677_1 (pp) WP_048574296_1" source="2527" target="2461" cy:directed="1"/>
      <edge id="29214" label="WP_006350677_1 (pp) WP_066976558_1" source="2527" target="2459" cy:directed="1"/>
      <edge id="29213" label="WP_006350677_1 (pp) RPK87717_1" source="2527" target="2538" cy:directed="1"/>
      <edge id="29212" label="WP_006350677_1 (pp) WP_081663146_1" source="2527" target="2457" cy:directed="1"/>
      <edge id="29211" label="WP_006350677_1 (pp) WP_116951408_3" source="2527" target="2537" cy:directed="1"/>
      <edge id="29210" label="WP_006350677_1 (pp) WP_077689962_1" source="2527" target="2454" cy:directed="1"/>
      <edge id="29209" label="WP_006350677_1 (pp) WP_129802804_1" source="2527" target="2536" cy:directed="1"/>
      <edge id="29208" label="WP_006350677_1 (pp) EHM27670_1" source="2527" target="2535" cy:directed="1"/>
      <edge id="29207" label="WP_006350677_1 (pp) WP_010048307_1" source="2527" target="2447" cy:directed="1"/>
      <edge id="29206" label="WP_006350677_1 (pp) WP_030701973_1" source="2527" target="2446" cy:directed="1"/>
      <edge id="29205" label="WP_006350677_1 (pp) WP_033318793_2" source="2527" target="2445" cy:directed="1"/>
      <edge id="29204" label="WP_006350677_1 (pp) WP_112271410_1" source="2527" target="2443" cy:directed="1"/>
      <edge id="29203" label="WP_094931980_2 (pp) ONI75210_2" source="2526" target="2552" cy:directed="1"/>
      <edge id="29202" label="WP_094931980_2 (pp) WP_086780456_1" source="2526" target="2551" cy:directed="1"/>
      <edge id="29201" label="WP_094931980_2 (pp) WP_040271779_1" source="2526" target="2553" cy:directed="1"/>
      <edge id="29200" label="WP_094931980_2 (pp) WP_067284698_3" source="2526" target="2533" cy:directed="1"/>
      <edge id="29199" label="WP_094931980_2 (pp) WP_027743449_4" source="2526" target="2532" cy:directed="1"/>
      <edge id="29198" label="WP_094931980_2 (pp) WP_055876321_1" source="2526" target="2550" cy:directed="1"/>
      <edge id="29197" label="WP_094931980_2 (pp) WP_125937921_2" source="2526" target="2549" cy:directed="1"/>
      <edge id="29196" label="WP_094931980_2 (pp) WP_110343524_1" source="2526" target="2530" cy:directed="1"/>
      <edge id="29195" label="WP_094931980_2 (pp) WP_017627596_1" source="2526" target="2531" cy:directed="1"/>
      <edge id="29194" label="WP_094931980_2 (pp) WP_081761968_1" source="2526" target="2548" cy:directed="1"/>
      <edge id="29193" label="WP_094931980_2 (pp) WP_130451801_3" source="2526" target="2529" cy:directed="1"/>
      <edge id="29192" label="WP_094931980_2 (pp) WP_096287923_1" source="2526" target="2547" cy:directed="1"/>
      <edge id="29191" label="WP_094931980_2 (pp) WP_083467034_1" source="2526" target="2525" cy:directed="1"/>
      <edge id="29190" label="WP_094931980_2 (pp) WP_090858762_1" source="2526" target="2546" cy:directed="1"/>
      <edge id="29189" label="WP_094931980_2 (pp) WP_045196822_2" source="2526" target="2521" cy:directed="1"/>
      <edge id="29188" label="WP_094931980_2 (pp) WP_038682890_3" source="2526" target="2520" cy:directed="1"/>
      <edge id="29187" label="WP_094931980_2 (pp) WP_037939130_1" source="2526" target="2516" cy:directed="1"/>
      <edge id="29186" label="WP_094931980_2 (pp) WP_064722319_1" source="2526" target="2513" cy:directed="1"/>
      <edge id="29185" label="WP_094931980_2 (pp) WP_114400345_1" source="2526" target="2511" cy:directed="1"/>
      <edge id="29184" label="WP_094931980_2 (pp) WP_093766414_4" source="2526" target="2510" cy:directed="1"/>
      <edge id="29183" label="WP_094931980_2 (pp) WP_078760898_1" source="2526" target="2509" cy:directed="1"/>
      <edge id="29182" label="WP_094931980_2 (pp) WP_073815370_1" source="2526" target="2508" cy:directed="1"/>
      <edge id="29181" label="WP_094931980_2 (pp) WP_053556805_1" source="2526" target="2507" cy:directed="1"/>
      <edge id="29180" label="WP_094931980_2 (pp) WP_115920406_2" source="2526" target="2545" cy:directed="1"/>
      <edge id="29179" label="WP_094931980_2 (pp) WP_093355673_1" source="2526" target="2505" cy:directed="1"/>
      <edge id="29178" label="WP_094931980_2 (pp) ALE78105_1" source="2526" target="2383" cy:directed="1"/>
      <edge id="29177" label="WP_094931980_2 (pp) ALG08515_1" source="2526" target="2544" cy:directed="1"/>
      <edge id="29176" label="WP_094931980_2 (pp) OKI12399_1" source="2526" target="2504" cy:directed="1"/>
      <edge id="29175" label="WP_094931980_2 (pp) WP_071934999_2" source="2526" target="2503" cy:directed="1"/>
      <edge id="29174" label="WP_094931980_2 (pp) WP_087767686_1" source="2526" target="2502" cy:directed="1"/>
      <edge id="29173" label="WP_094931980_2 (pp) OQO95173_1" source="2526" target="2501" cy:directed="1"/>
      <edge id="29172" label="WP_094931980_2 (pp) WP_029987712_1" source="2526" target="2500" cy:directed="1"/>
      <edge id="29171" label="WP_094931980_2 (pp) WP_018847808_1" source="2526" target="2499" cy:directed="1"/>
      <edge id="29170" label="WP_094931980_2 (pp) KWX01007_1" source="2526" target="2498" cy:directed="1"/>
      <edge id="29169" label="WP_094931980_2 (pp) WP_123813761_1" source="2526" target="2496" cy:directed="1"/>
      <edge id="29168" label="WP_094931980_2 (pp) OLO29347_1" source="2526" target="2495" cy:directed="1"/>
      <edge id="29167" label="WP_094931980_2 (pp) WP_113689373_1" source="2526" target="2493" cy:directed="1"/>
      <edge id="29166" label="WP_094931980_2 (pp) WP_121830363_1" source="2526" target="2543" cy:directed="1"/>
      <edge id="29165" label="WP_094931980_2 (pp) WP_095752644_1" source="2526" target="2492" cy:directed="1"/>
      <edge id="29164" label="WP_094931980_2 (pp) WP_097634704_1" source="2526" target="2490" cy:directed="1"/>
      <edge id="29163" label="WP_094931980_2 (pp) WP_107004474_1" source="2526" target="2542" cy:directed="1"/>
      <edge id="29162" label="WP_094931980_2 (pp) PXY18584_1" source="2526" target="2489" cy:directed="1"/>
      <edge id="29161" label="WP_094931980_2 (pp) WP_083753877_2" source="2526" target="2488" cy:directed="1"/>
      <edge id="29160" label="WP_094931980_2 (pp) KKI16967_3" source="2526" target="2486" cy:directed="1"/>
      <edge id="29159" label="WP_094931980_2 (pp) WP_084252732_3" source="2526" target="2485" cy:directed="1"/>
      <edge id="29158" label="WP_094931980_2 (pp) SJZ81173_1" source="2526" target="2484" cy:directed="1"/>
      <edge id="29157" label="WP_094931980_2 (pp) WP_103467468_1" source="2526" target="2483" cy:directed="1"/>
      <edge id="29156" label="WP_094931980_2 (pp) WP_033300563_1" source="2526" target="2482" cy:directed="1"/>
      <edge id="29155" label="WP_094931980_2 (pp) WP_058632033_1" source="2526" target="2481" cy:directed="1"/>
      <edge id="29154" label="WP_094931980_2 (pp) WP_078612341_1" source="2526" target="2480" cy:directed="1"/>
      <edge id="29153" label="WP_094931980_2 (pp) WP_059008183_2" source="2526" target="2479" cy:directed="1"/>
      <edge id="29152" label="WP_094931980_2 (pp) WP_116112318_1" source="2526" target="2477" cy:directed="1"/>
      <edge id="29151" label="WP_094931980_2 (pp) WP_031002210_2" source="2526" target="2476" cy:directed="1"/>
      <edge id="29150" label="WP_094931980_2 (pp) ALC19908_1" source="2526" target="2475" cy:directed="1"/>
      <edge id="29149" label="WP_094931980_2 (pp) WP_015100718_1" source="2526" target="2474" cy:directed="1"/>
      <edge id="29148" label="WP_094931980_2 (pp) WP_006501818_1" source="2526" target="2473" cy:directed="1"/>
      <edge id="29147" label="WP_094931980_2 (pp) WP_055689909_1" source="2526" target="2472" cy:directed="1"/>
      <edge id="29146" label="WP_094931980_2 (pp) WP_121007506_1" source="2526" target="2471" cy:directed="1"/>
      <edge id="29145" label="WP_094931980_2 (pp) WP_058915320_1" source="2526" target="2470" cy:directed="1"/>
      <edge id="29144" label="WP_094931980_2 (pp) WP_105722094_1" source="2526" target="2469" cy:directed="1"/>
      <edge id="29143" label="WP_094931980_2 (pp) WP_109186559_1" source="2526" target="2468" cy:directed="1"/>
      <edge id="29142" label="WP_094931980_2 (pp) SED75494_1" source="2526" target="2467" cy:directed="1"/>
      <edge id="29141" label="WP_094931980_2 (pp) WP_053623192_1" source="2526" target="2539" cy:directed="1"/>
      <edge id="29140" label="WP_094931980_2 (pp) WP_062924764_1" source="2526" target="2464" cy:directed="1"/>
      <edge id="29139" label="WP_094931980_2 (pp) WP_093655900_5" source="2526" target="2463" cy:directed="1"/>
      <edge id="29138" label="WP_094931980_2 (pp) WP_105527259_1" source="2526" target="2462" cy:directed="1"/>
      <edge id="29137" label="WP_094931980_2 (pp) WP_052852666_2" source="2526" target="2460" cy:directed="1"/>
      <edge id="29136" label="WP_094931980_2 (pp) WP_048574296_1" source="2526" target="2461" cy:directed="1"/>
      <edge id="29135" label="WP_094931980_2 (pp) WP_066976558_1" source="2526" target="2459" cy:directed="1"/>
      <edge id="29134" label="WP_094931980_2 (pp) RPK87717_1" source="2526" target="2538" cy:directed="1"/>
      <edge id="29133" label="WP_094931980_2 (pp) WP_081663146_1" source="2526" target="2457" cy:directed="1"/>
      <edge id="29132" label="WP_094931980_2 (pp) WP_116951408_3" source="2526" target="2537" cy:directed="1"/>
      <edge id="29131" label="WP_094931980_2 (pp) WP_077689962_1" source="2526" target="2454" cy:directed="1"/>
      <edge id="29130" label="WP_094931980_2 (pp) WP_043461231_1" source="2526" target="2455" cy:directed="1"/>
      <edge id="29129" label="WP_094931980_2 (pp) WP_129802804_1" source="2526" target="2536" cy:directed="1"/>
      <edge id="29128" label="WP_094931980_2 (pp) WP_028327189_1" source="2526" target="2453" cy:directed="1"/>
      <edge id="29127" label="WP_094931980_2 (pp) EHM27670_1" source="2526" target="2535" cy:directed="1"/>
      <edge id="29126" label="WP_094931980_2 (pp) WP_016691947_2" source="2526" target="2452" cy:directed="1"/>
      <edge id="29125" label="WP_094931980_2 (pp) WP_125509413_1" source="2526" target="2449" cy:directed="1"/>
      <edge id="29124" label="WP_094931980_2 (pp) CEL19833_1" source="2526" target="2448" cy:directed="1"/>
      <edge id="29123" label="WP_094931980_2 (pp) WP_010048307_1" source="2526" target="2447" cy:directed="1"/>
      <edge id="29122" label="WP_094931980_2 (pp) WP_030701973_1" source="2526" target="2446" cy:directed="1"/>
      <edge id="29121" label="WP_094931980_2 (pp) WP_033318793_2" source="2526" target="2445" cy:directed="1"/>
      <edge id="29120" label="WP_094931980_2 (pp) WP_083472659_1" source="2526" target="2444" cy:directed="1"/>
      <edge id="29119" label="WP_094931980_2 (pp) WP_112271410_1" source="2526" target="2443" cy:directed="1"/>
      <edge id="29118" label="WP_083467034_1 (pp) ONI75210_2" source="2525" target="2552" cy:directed="1"/>
      <edge id="29117" label="WP_083467034_1 (pp) WP_086780456_1" source="2525" target="2551" cy:directed="1"/>
      <edge id="29116" label="WP_083467034_1 (pp) WP_040271779_1" source="2525" target="2553" cy:directed="1"/>
      <edge id="29115" label="WP_083467034_1 (pp) WP_067284698_3" source="2525" target="2533" cy:directed="1"/>
      <edge id="29114" label="WP_083467034_1 (pp) WP_055876321_1" source="2525" target="2550" cy:directed="1"/>
      <edge id="29113" label="WP_083467034_1 (pp) WP_027743449_4" source="2525" target="2532" cy:directed="1"/>
      <edge id="29112" label="WP_083467034_1 (pp) WP_125937921_2" source="2525" target="2549" cy:directed="1"/>
      <edge id="29111" label="WP_083467034_1 (pp) WP_110343524_1" source="2525" target="2530" cy:directed="1"/>
      <edge id="29110" label="WP_083467034_1 (pp) WP_081761968_1" source="2525" target="2548" cy:directed="1"/>
      <edge id="29109" label="WP_083467034_1 (pp) WP_130451801_3" source="2525" target="2529" cy:directed="1"/>
      <edge id="29108" label="WP_083467034_1 (pp) WP_084752844_1" source="2525" target="2528" cy:directed="1"/>
      <edge id="29107" label="WP_083467034_1 (pp) WP_006350677_1" source="2525" target="2527" cy:directed="1"/>
      <edge id="29106" label="WP_083467034_1 (pp) WP_096287923_1" source="2525" target="2547" cy:directed="1"/>
      <edge id="29105" label="WP_083467034_1 (pp) WP_090858762_1" source="2525" target="2546" cy:directed="1"/>
      <edge id="29104" label="WP_083467034_1 (pp) WP_017594221_1" source="2525" target="2523" cy:directed="1"/>
      <edge id="29103" label="WP_083467034_1 (pp) WP_110470681_1" source="2525" target="2517" cy:directed="1"/>
      <edge id="29102" label="WP_083467034_1 (pp) WP_037939130_1" source="2525" target="2516" cy:directed="1"/>
      <edge id="29101" label="WP_083467034_1 (pp) WP_114400345_1" source="2525" target="2511" cy:directed="1"/>
      <edge id="29100" label="WP_083467034_1 (pp) WP_078760898_1" source="2525" target="2509" cy:directed="1"/>
      <edge id="29099" label="WP_083467034_1 (pp) WP_053556805_1" source="2525" target="2507" cy:directed="1"/>
      <edge id="29098" label="WP_083467034_1 (pp) WP_115920406_2" source="2525" target="2545" cy:directed="1"/>
      <edge id="29097" label="WP_083467034_1 (pp) WP_093355673_1" source="2525" target="2505" cy:directed="1"/>
      <edge id="29096" label="WP_083467034_1 (pp) ALG08515_1" source="2525" target="2544" cy:directed="1"/>
      <edge id="29095" label="WP_083467034_1 (pp) WP_087767686_1" source="2525" target="2502" cy:directed="1"/>
      <edge id="29094" label="WP_083467034_1 (pp) OQO95173_1" source="2525" target="2501" cy:directed="1"/>
      <edge id="29093" label="WP_083467034_1 (pp) OLO29347_1" source="2525" target="2495" cy:directed="1"/>
      <edge id="29092" label="WP_083467034_1 (pp) WP_123813761_1" source="2525" target="2496" cy:directed="1"/>
      <edge id="29091" label="WP_083467034_1 (pp) WP_121830363_1" source="2525" target="2543" cy:directed="1"/>
      <edge id="29090" label="WP_083467034_1 (pp) WP_107004474_1" source="2525" target="2542" cy:directed="1"/>
      <edge id="29089" label="WP_083467034_1 (pp) WP_097634704_1" source="2525" target="2490" cy:directed="1"/>
      <edge id="29088" label="WP_083467034_1 (pp) WP_081907113_1" source="2525" target="2541" cy:directed="1"/>
      <edge id="29087" label="WP_083467034_1 (pp) WP_084252732_3" source="2525" target="2485" cy:directed="1"/>
      <edge id="29086" label="WP_083467034_1 (pp) WP_059008183_2" source="2525" target="2479" cy:directed="1"/>
      <edge id="29085" label="WP_083467034_1 (pp) WP_073876556_1" source="2525" target="2540" cy:directed="1"/>
      <edge id="29084" label="WP_083467034_1 (pp) WP_008409979_1" source="2525" target="2478" cy:directed="1"/>
      <edge id="29083" label="WP_083467034_1 (pp) WP_116112318_1" source="2525" target="2477" cy:directed="1"/>
      <edge id="29082" label="WP_083467034_1 (pp) WP_031002210_2" source="2525" target="2476" cy:directed="1"/>
      <edge id="29081" label="WP_083467034_1 (pp) WP_015100718_1" source="2525" target="2474" cy:directed="1"/>
      <edge id="29080" label="WP_083467034_1 (pp) WP_006501818_1" source="2525" target="2473" cy:directed="1"/>
      <edge id="29079" label="WP_083467034_1 (pp) WP_111250567_1" source="2525" target="2466" cy:directed="1"/>
      <edge id="29078" label="WP_083467034_1 (pp) WP_053623192_1" source="2525" target="2539" cy:directed="1"/>
      <edge id="29077" label="WP_083467034_1 (pp) WP_105527259_1" source="2525" target="2462" cy:directed="1"/>
      <edge id="29076" label="WP_083467034_1 (pp) WP_048574296_1" source="2525" target="2461" cy:directed="1"/>
      <edge id="29075" label="WP_083467034_1 (pp) WP_052852666_2" source="2525" target="2460" cy:directed="1"/>
      <edge id="29074" label="WP_083467034_1 (pp) WP_066976558_1" source="2525" target="2459" cy:directed="1"/>
      <edge id="29073" label="WP_083467034_1 (pp) RPK87717_1" source="2525" target="2538" cy:directed="1"/>
      <edge id="29072" label="WP_083467034_1 (pp) WP_081663146_1" source="2525" target="2457" cy:directed="1"/>
      <edge id="29071" label="WP_083467034_1 (pp) WP_116951408_3" source="2525" target="2537" cy:directed="1"/>
      <edge id="29070" label="WP_083467034_1 (pp) WP_077689962_1" source="2525" target="2454" cy:directed="1"/>
      <edge id="29069" label="WP_083467034_1 (pp) WP_056298480_2" source="2525" target="2368" cy:directed="1"/>
      <edge id="29068" label="WP_083467034_1 (pp) WP_129802804_1" source="2525" target="2536" cy:directed="1"/>
      <edge id="29067" label="WP_083467034_1 (pp) EHM27670_1" source="2525" target="2535" cy:directed="1"/>
      <edge id="29066" label="WP_083467034_1 (pp) WP_010048307_1" source="2525" target="2447" cy:directed="1"/>
      <edge id="29065" label="WP_083467034_1 (pp) WP_030701973_1" source="2525" target="2446" cy:directed="1"/>
      <edge id="29064" label="WP_083467034_1 (pp) WP_033318793_2" source="2525" target="2445" cy:directed="1"/>
      <edge id="29063" label="WP_083467034_1 (pp) WP_112271410_1" source="2525" target="2443" cy:directed="1"/>
      <edge id="29062" label="WP_105672644_2 (pp) ONI75210_2" source="2524" target="2552" cy:directed="1"/>
      <edge id="29061" label="WP_105672644_2 (pp) WP_086780456_1" source="2524" target="2551" cy:directed="1"/>
      <edge id="29060" label="WP_105672644_2 (pp) WP_040271779_1" source="2524" target="2553" cy:directed="1"/>
      <edge id="29059" label="WP_105672644_2 (pp) WP_067284698_3" source="2524" target="2533" cy:directed="1"/>
      <edge id="29058" label="WP_105672644_2 (pp) WP_027743449_4" source="2524" target="2532" cy:directed="1"/>
      <edge id="29057" label="WP_105672644_2 (pp) WP_055876321_1" source="2524" target="2550" cy:directed="1"/>
      <edge id="29056" label="WP_105672644_2 (pp) WP_125937921_2" source="2524" target="2549" cy:directed="1"/>
      <edge id="29055" label="WP_105672644_2 (pp) WP_110343524_1" source="2524" target="2530" cy:directed="1"/>
      <edge id="29054" label="WP_105672644_2 (pp) WP_081761968_1" source="2524" target="2548" cy:directed="1"/>
      <edge id="29053" label="WP_105672644_2 (pp) WP_130451801_3" source="2524" target="2529" cy:directed="1"/>
      <edge id="29052" label="WP_105672644_2 (pp) WP_084752844_1" source="2524" target="2528" cy:directed="1"/>
      <edge id="29051" label="WP_105672644_2 (pp) WP_096287923_1" source="2524" target="2547" cy:directed="1"/>
      <edge id="29050" label="WP_105672644_2 (pp) WP_083467034_1" source="2524" target="2525" cy:directed="1"/>
      <edge id="29049" label="WP_105672644_2 (pp) WP_017594221_1" source="2524" target="2523" cy:directed="1"/>
      <edge id="29048" label="WP_105672644_2 (pp) WP_037939130_1" source="2524" target="2516" cy:directed="1"/>
      <edge id="29047" label="WP_105672644_2 (pp) WP_064722319_1" source="2524" target="2513" cy:directed="1"/>
      <edge id="29046" label="WP_105672644_2 (pp) WP_114400345_1" source="2524" target="2511" cy:directed="1"/>
      <edge id="29045" label="WP_105672644_2 (pp) WP_093766414_4" source="2524" target="2510" cy:directed="1"/>
      <edge id="29044" label="WP_105672644_2 (pp) WP_078760898_1" source="2524" target="2509" cy:directed="1"/>
      <edge id="29043" label="WP_105672644_2 (pp) WP_053556805_1" source="2524" target="2507" cy:directed="1"/>
      <edge id="29042" label="WP_105672644_2 (pp) WP_115920406_2" source="2524" target="2545" cy:directed="1"/>
      <edge id="29041" label="WP_105672644_2 (pp) WP_093355673_1" source="2524" target="2505" cy:directed="1"/>
      <edge id="29040" label="WP_105672644_2 (pp) ALE78105_1" source="2524" target="2383" cy:directed="1"/>
      <edge id="29039" label="WP_105672644_2 (pp) ALG08515_1" source="2524" target="2544" cy:directed="1"/>
      <edge id="29038" label="WP_105672644_2 (pp) WP_071934999_2" source="2524" target="2503" cy:directed="1"/>
      <edge id="29037" label="WP_105672644_2 (pp) WP_087767686_1" source="2524" target="2502" cy:directed="1"/>
      <edge id="29036" label="WP_105672644_2 (pp) OQO95173_1" source="2524" target="2501" cy:directed="1"/>
      <edge id="29035" label="WP_105672644_2 (pp) WP_018847808_1" source="2524" target="2499" cy:directed="1"/>
      <edge id="29034" label="WP_105672644_2 (pp) OLO29347_1" source="2524" target="2495" cy:directed="1"/>
      <edge id="29033" label="WP_105672644_2 (pp) WP_123813761_1" source="2524" target="2496" cy:directed="1"/>
      <edge id="29032" label="WP_105672644_2 (pp) WP_113689373_1" source="2524" target="2493" cy:directed="1"/>
      <edge id="29031" label="WP_105672644_2 (pp) RLV71217_1" source="2524" target="2491" cy:directed="1"/>
      <edge id="29030" label="WP_105672644_2 (pp) WP_121830363_1" source="2524" target="2543" cy:directed="1"/>
      <edge id="29029" label="WP_105672644_2 (pp) WP_097634704_1" source="2524" target="2490" cy:directed="1"/>
      <edge id="29028" label="WP_105672644_2 (pp) WP_107004474_1" source="2524" target="2542" cy:directed="1"/>
      <edge id="29027" label="WP_105672644_2 (pp) WP_083753877_2" source="2524" target="2488" cy:directed="1"/>
      <edge id="29026" label="WP_105672644_2 (pp) WP_081907113_1" source="2524" target="2541" cy:directed="1"/>
      <edge id="29025" label="WP_105672644_2 (pp) WP_084252732_3" source="2524" target="2485" cy:directed="1"/>
      <edge id="29024" label="WP_105672644_2 (pp) SJZ81173_1" source="2524" target="2484" cy:directed="1"/>
      <edge id="29023" label="WP_105672644_2 (pp) WP_103467468_1" source="2524" target="2483" cy:directed="1"/>
      <edge id="29022" label="WP_105672644_2 (pp) WP_033300563_1" source="2524" target="2482" cy:directed="1"/>
      <edge id="29021" label="WP_105672644_2 (pp) WP_078612341_1" source="2524" target="2480" cy:directed="1"/>
      <edge id="29020" label="WP_105672644_2 (pp) WP_059008183_2" source="2524" target="2479" cy:directed="1"/>
      <edge id="29019" label="WP_105672644_2 (pp) WP_073876556_1" source="2524" target="2540" cy:directed="1"/>
      <edge id="29018" label="WP_105672644_2 (pp) WP_008409979_1" source="2524" target="2478" cy:directed="1"/>
      <edge id="29017" label="WP_105672644_2 (pp) WP_116112318_1" source="2524" target="2477" cy:directed="1"/>
      <edge id="29016" label="WP_105672644_2 (pp) WP_031002210_2" source="2524" target="2476" cy:directed="1"/>
      <edge id="29015" label="WP_105672644_2 (pp) ALC19908_1" source="2524" target="2475" cy:directed="1"/>
      <edge id="29014" label="WP_105672644_2 (pp) WP_015100718_1" source="2524" target="2474" cy:directed="1"/>
      <edge id="29013" label="WP_105672644_2 (pp) WP_006501818_1" source="2524" target="2473" cy:directed="1"/>
      <edge id="29012" label="WP_105672644_2 (pp) WP_055689909_1" source="2524" target="2472" cy:directed="1"/>
      <edge id="29011" label="WP_105672644_2 (pp) WP_109186559_1" source="2524" target="2468" cy:directed="1"/>
      <edge id="29010" label="WP_105672644_2 (pp) SED75494_1" source="2524" target="2467" cy:directed="1"/>
      <edge id="29009" label="WP_105672644_2 (pp) WP_111250567_1" source="2524" target="2466" cy:directed="1"/>
      <edge id="29008" label="WP_105672644_2 (pp) WP_062924764_1" source="2524" target="2464" cy:directed="1"/>
      <edge id="29007" label="WP_105672644_2 (pp) WP_053623192_1" source="2524" target="2539" cy:directed="1"/>
      <edge id="29006" label="WP_105672644_2 (pp) WP_105527259_1" source="2524" target="2462" cy:directed="1"/>
      <edge id="29005" label="WP_105672644_2 (pp) WP_052852666_2" source="2524" target="2460" cy:directed="1"/>
      <edge id="29004" label="WP_105672644_2 (pp) WP_048574296_1" source="2524" target="2461" cy:directed="1"/>
      <edge id="29003" label="WP_105672644_2 (pp) WP_066976558_1" source="2524" target="2459" cy:directed="1"/>
      <edge id="29002" label="WP_105672644_2 (pp) RPK87717_1" source="2524" target="2538" cy:directed="1"/>
      <edge id="29001" label="WP_105672644_2 (pp) WP_081663146_1" source="2524" target="2457" cy:directed="1"/>
      <edge id="29000" label="WP_105672644_2 (pp) WP_116951408_3" source="2524" target="2537" cy:directed="1"/>
      <edge id="28999" label="WP_105672644_2 (pp) WP_077689962_1" source="2524" target="2454" cy:directed="1"/>
      <edge id="28998" label="WP_105672644_2 (pp) WP_129802804_1" source="2524" target="2536" cy:directed="1"/>
      <edge id="28997" label="WP_105672644_2 (pp) WP_028327189_1" source="2524" target="2453" cy:directed="1"/>
      <edge id="28996" label="WP_105672644_2 (pp) EHM27670_1" source="2524" target="2535" cy:directed="1"/>
      <edge id="28995" label="WP_105672644_2 (pp) WP_070343622_1" source="2524" target="2451" cy:directed="1"/>
      <edge id="28994" label="WP_105672644_2 (pp) OKI46856_1" source="2524" target="2450" cy:directed="1"/>
      <edge id="28993" label="WP_105672644_2 (pp) WP_010048307_1" source="2524" target="2447" cy:directed="1"/>
      <edge id="28992" label="WP_105672644_2 (pp) WP_030701973_1" source="2524" target="2446" cy:directed="1"/>
      <edge id="28991" label="WP_105672644_2 (pp) WP_033318793_2" source="2524" target="2445" cy:directed="1"/>
      <edge id="28990" label="WP_105672644_2 (pp) WP_112271410_1" source="2524" target="2443" cy:directed="1"/>
      <edge id="28989" label="WP_017594221_1 (pp) ONI75210_2" source="2523" target="2552" cy:directed="1"/>
      <edge id="28988" label="WP_017594221_1 (pp) WP_086780456_1" source="2523" target="2551" cy:directed="1"/>
      <edge id="28987" label="WP_017594221_1 (pp) WP_040271779_1" source="2523" target="2553" cy:directed="1"/>
      <edge id="28986" label="WP_017594221_1 (pp) WP_067284698_3" source="2523" target="2533" cy:directed="1"/>
      <edge id="28985" label="WP_017594221_1 (pp) WP_055876321_1" source="2523" target="2550" cy:directed="1"/>
      <edge id="28984" label="WP_017594221_1 (pp) WP_125937921_2" source="2523" target="2549" cy:directed="1"/>
      <edge id="28983" label="WP_017594221_1 (pp) WP_081761968_1" source="2523" target="2548" cy:directed="1"/>
      <edge id="28982" label="WP_017594221_1 (pp) WP_130451801_3" source="2523" target="2529" cy:directed="1"/>
      <edge id="28981" label="WP_017594221_1 (pp) WP_096287923_1" source="2523" target="2547" cy:directed="1"/>
      <edge id="28980" label="WP_017594221_1 (pp) WP_090858762_1" source="2523" target="2546" cy:directed="1"/>
      <edge id="28979" label="WP_017594221_1 (pp) WP_115920406_2" source="2523" target="2545" cy:directed="1"/>
      <edge id="28978" label="WP_017594221_1 (pp) ALG08515_1" source="2523" target="2544" cy:directed="1"/>
      <edge id="28977" label="WP_017594221_1 (pp) WP_121830363_1" source="2523" target="2543" cy:directed="1"/>
      <edge id="28976" label="WP_017594221_1 (pp) WP_107004474_1" source="2523" target="2542" cy:directed="1"/>
      <edge id="28975" label="WP_017594221_1 (pp) WP_081907113_1" source="2523" target="2541" cy:directed="1"/>
      <edge id="28974" label="WP_017594221_1 (pp) WP_073876556_1" source="2523" target="2540" cy:directed="1"/>
      <edge id="28973" label="WP_017594221_1 (pp) WP_053623192_1" source="2523" target="2539" cy:directed="1"/>
      <edge id="28972" label="WP_017594221_1 (pp) RPK87717_1" source="2523" target="2538" cy:directed="1"/>
      <edge id="28971" label="WP_017594221_1 (pp) WP_116951408_3" source="2523" target="2537" cy:directed="1"/>
      <edge id="28970" label="WP_017594221_1 (pp) WP_129802804_1" source="2523" target="2536" cy:directed="1"/>
      <edge id="28969" label="WP_017594221_1 (pp) EHM27670_1" source="2523" target="2535" cy:directed="1"/>
      <edge id="28968" label="WP_015613007_1 (pp) ONI75210_2" source="2522" target="2552" cy:directed="1"/>
      <edge id="28967" label="WP_015613007_1 (pp) WP_086780456_1" source="2522" target="2551" cy:directed="1"/>
      <edge id="28966" label="WP_015613007_1 (pp) WP_040271779_1" source="2522" target="2553" cy:directed="1"/>
      <edge id="28965" label="WP_015613007_1 (pp) WP_067284698_3" source="2522" target="2533" cy:directed="1"/>
      <edge id="28964" label="WP_015613007_1 (pp) WP_055876321_1" source="2522" target="2550" cy:directed="1"/>
      <edge id="28963" label="WP_015613007_1 (pp) WP_027743449_4" source="2522" target="2532" cy:directed="1"/>
      <edge id="28962" label="WP_015613007_1 (pp) WP_125937921_2" source="2522" target="2549" cy:directed="1"/>
      <edge id="28961" label="WP_015613007_1 (pp) WP_110343524_1" source="2522" target="2530" cy:directed="1"/>
      <edge id="28960" label="WP_015613007_1 (pp) WP_081761968_1" source="2522" target="2548" cy:directed="1"/>
      <edge id="28959" label="WP_015613007_1 (pp) WP_130451801_3" source="2522" target="2529" cy:directed="1"/>
      <edge id="28958" label="WP_015613007_1 (pp) WP_084752844_1" source="2522" target="2528" cy:directed="1"/>
      <edge id="28957" label="WP_015613007_1 (pp) WP_006350677_1" source="2522" target="2527" cy:directed="1"/>
      <edge id="28956" label="WP_015613007_1 (pp) WP_096287923_1" source="2522" target="2547" cy:directed="1"/>
      <edge id="28955" label="WP_015613007_1 (pp) WP_083467034_1" source="2522" target="2525" cy:directed="1"/>
      <edge id="28954" label="WP_015613007_1 (pp) WP_090858762_1" source="2522" target="2546" cy:directed="1"/>
      <edge id="28953" label="WP_015613007_1 (pp) WP_105672644_2" source="2522" target="2524" cy:directed="1"/>
      <edge id="28952" label="WP_015613007_1 (pp) WP_017594221_1" source="2522" target="2523" cy:directed="1"/>
      <edge id="28951" label="WP_015613007_1 (pp) WP_038682890_3" source="2522" target="2520" cy:directed="1"/>
      <edge id="28950" label="WP_015613007_1 (pp) WP_110470681_1" source="2522" target="2517" cy:directed="1"/>
      <edge id="28949" label="WP_015613007_1 (pp) WP_037939130_1" source="2522" target="2516" cy:directed="1"/>
      <edge id="28948" label="WP_015613007_1 (pp) WP_064722319_1" source="2522" target="2513" cy:directed="1"/>
      <edge id="28947" label="WP_015613007_1 (pp) WP_114400345_1" source="2522" target="2511" cy:directed="1"/>
      <edge id="28946" label="WP_015613007_1 (pp) WP_093766414_4" source="2522" target="2510" cy:directed="1"/>
      <edge id="28945" label="WP_015613007_1 (pp) WP_078760898_1" source="2522" target="2509" cy:directed="1"/>
      <edge id="28944" label="WP_015613007_1 (pp) WP_053556805_1" source="2522" target="2507" cy:directed="1"/>
      <edge id="28943" label="WP_015613007_1 (pp) WP_115920406_2" source="2522" target="2545" cy:directed="1"/>
      <edge id="28942" label="WP_015613007_1 (pp) WP_093355673_1" source="2522" target="2505" cy:directed="1"/>
      <edge id="28941" label="WP_015613007_1 (pp) ALG08515_1" source="2522" target="2544" cy:directed="1"/>
      <edge id="28940" label="WP_015613007_1 (pp) WP_071934999_2" source="2522" target="2503" cy:directed="1"/>
      <edge id="28939" label="WP_015613007_1 (pp) WP_087767686_1" source="2522" target="2502" cy:directed="1"/>
      <edge id="28938" label="WP_015613007_1 (pp) OQO95173_1" source="2522" target="2501" cy:directed="1"/>
      <edge id="28937" label="WP_015613007_1 (pp) WP_018847808_1" source="2522" target="2499" cy:directed="1"/>
      <edge id="28936" label="WP_015613007_1 (pp) WP_123813761_1" source="2522" target="2496" cy:directed="1"/>
      <edge id="28935" label="WP_015613007_1 (pp) OLO29347_1" source="2522" target="2495" cy:directed="1"/>
      <edge id="28934" label="WP_015613007_1 (pp) WP_113689373_1" source="2522" target="2493" cy:directed="1"/>
      <edge id="28933" label="WP_015613007_1 (pp) WP_121830363_1" source="2522" target="2543" cy:directed="1"/>
      <edge id="28932" label="WP_015613007_1 (pp) RLV71217_1" source="2522" target="2491" cy:directed="1"/>
      <edge id="28931" label="WP_015613007_1 (pp) WP_107004474_1" source="2522" target="2542" cy:directed="1"/>
      <edge id="28930" label="WP_015613007_1 (pp) WP_097634704_1" source="2522" target="2490" cy:directed="1"/>
      <edge id="28929" label="WP_015613007_1 (pp) WP_083753877_2" source="2522" target="2488" cy:directed="1"/>
      <edge id="28928" label="WP_015613007_1 (pp) WP_081907113_1" source="2522" target="2541" cy:directed="1"/>
      <edge id="28927" label="WP_015613007_1 (pp) WP_084252732_3" source="2522" target="2485" cy:directed="1"/>
      <edge id="28926" label="WP_015613007_1 (pp) SJZ81173_1" source="2522" target="2484" cy:directed="1"/>
      <edge id="28925" label="WP_015613007_1 (pp) WP_103467468_1" source="2522" target="2483" cy:directed="1"/>
      <edge id="28924" label="WP_015613007_1 (pp) WP_033300563_1" source="2522" target="2482" cy:directed="1"/>
      <edge id="28923" label="WP_015613007_1 (pp) WP_078612341_1" source="2522" target="2480" cy:directed="1"/>
      <edge id="28922" label="WP_015613007_1 (pp) WP_059008183_2" source="2522" target="2479" cy:directed="1"/>
      <edge id="28921" label="WP_015613007_1 (pp) WP_073876556_1" source="2522" target="2540" cy:directed="1"/>
      <edge id="28920" label="WP_015613007_1 (pp) WP_008409979_1" source="2522" target="2478" cy:directed="1"/>
      <edge id="28919" label="WP_015613007_1 (pp) WP_116112318_1" source="2522" target="2477" cy:directed="1"/>
      <edge id="28918" label="WP_015613007_1 (pp) WP_031002210_2" source="2522" target="2476" cy:directed="1"/>
      <edge id="28917" label="WP_015613007_1 (pp) ALC19908_1" source="2522" target="2475" cy:directed="1"/>
      <edge id="28916" label="WP_015613007_1 (pp) WP_015100718_1" source="2522" target="2474" cy:directed="1"/>
      <edge id="28915" label="WP_015613007_1 (pp) WP_006501818_1" source="2522" target="2473" cy:directed="1"/>
      <edge id="28914" label="WP_015613007_1 (pp) WP_055689909_1" source="2522" target="2472" cy:directed="1"/>
      <edge id="28913" label="WP_015613007_1 (pp) WP_109186559_1" source="2522" target="2468" cy:directed="1"/>
      <edge id="28912" label="WP_015613007_1 (pp) SED75494_1" source="2522" target="2467" cy:directed="1"/>
      <edge id="28911" label="WP_015613007_1 (pp) WP_111250567_1" source="2522" target="2466" cy:directed="1"/>
      <edge id="28910" label="WP_015613007_1 (pp) WP_062924764_1" source="2522" target="2464" cy:directed="1"/>
      <edge id="28909" label="WP_015613007_1 (pp) WP_053623192_1" source="2522" target="2539" cy:directed="1"/>
      <edge id="28908" label="WP_015613007_1 (pp) WP_105527259_1" source="2522" target="2462" cy:directed="1"/>
      <edge id="28907" label="WP_015613007_1 (pp) WP_048574296_1" source="2522" target="2461" cy:directed="1"/>
      <edge id="28906" label="WP_015613007_1 (pp) WP_052852666_2" source="2522" target="2460" cy:directed="1"/>
      <edge id="28905" label="WP_015613007_1 (pp) WP_066976558_1" source="2522" target="2459" cy:directed="1"/>
      <edge id="28904" label="WP_015613007_1 (pp) RPK87717_1" source="2522" target="2538" cy:directed="1"/>
      <edge id="28903" label="WP_015613007_1 (pp) WP_081663146_1" source="2522" target="2457" cy:directed="1"/>
      <edge id="28902" label="WP_015613007_1 (pp) WP_116951408_3" source="2522" target="2537" cy:directed="1"/>
      <edge id="28901" label="WP_015613007_1 (pp) WP_077689962_1" source="2522" target="2454" cy:directed="1"/>
      <edge id="28900" label="WP_015613007_1 (pp) WP_129802804_1" source="2522" target="2536" cy:directed="1"/>
      <edge id="28899" label="WP_015613007_1 (pp) WP_028327189_1" source="2522" target="2453" cy:directed="1"/>
      <edge id="28898" label="WP_015613007_1 (pp) EHM27670_1" source="2522" target="2535" cy:directed="1"/>
      <edge id="28897" label="WP_015613007_1 (pp) WP_070343622_1" source="2522" target="2451" cy:directed="1"/>
      <edge id="28896" label="WP_015613007_1 (pp) OKI46856_1" source="2522" target="2450" cy:directed="1"/>
      <edge id="28895" label="WP_015613007_1 (pp) WP_010048307_1" source="2522" target="2447" cy:directed="1"/>
      <edge id="28894" label="WP_015613007_1 (pp) WP_030701973_1" source="2522" target="2446" cy:directed="1"/>
      <edge id="28893" label="WP_015613007_1 (pp) WP_033318793_2" source="2522" target="2445" cy:directed="1"/>
      <edge id="28892" label="WP_015613007_1 (pp) WP_112271410_1" source="2522" target="2443" cy:directed="1"/>
      <edge id="28891" label="WP_045196822_2 (pp) ONI75210_2" source="2521" target="2552" cy:directed="1"/>
      <edge id="28890" label="WP_045196822_2 (pp) WP_086780456_1" source="2521" target="2551" cy:directed="1"/>
      <edge id="28889" label="WP_045196822_2 (pp) WP_040271779_1" source="2521" target="2553" cy:directed="1"/>
      <edge id="28888" label="WP_045196822_2 (pp) WP_067284698_3" source="2521" target="2533" cy:directed="1"/>
      <edge id="28887" label="WP_045196822_2 (pp) WP_055876321_1" source="2521" target="2550" cy:directed="1"/>
      <edge id="28886" label="WP_045196822_2 (pp) WP_027743449_4" source="2521" target="2532" cy:directed="1"/>
      <edge id="28885" label="WP_045196822_2 (pp) WP_125937921_2" source="2521" target="2549" cy:directed="1"/>
      <edge id="28884" label="WP_045196822_2 (pp) WP_110343524_1" source="2521" target="2530" cy:directed="1"/>
      <edge id="28883" label="WP_045196822_2 (pp) WP_081761968_1" source="2521" target="2548" cy:directed="1"/>
      <edge id="28882" label="WP_045196822_2 (pp) WP_130451801_3" source="2521" target="2529" cy:directed="1"/>
      <edge id="28881" label="WP_045196822_2 (pp) WP_084752844_1" source="2521" target="2528" cy:directed="1"/>
      <edge id="28880" label="WP_045196822_2 (pp) WP_006350677_1" source="2521" target="2527" cy:directed="1"/>
      <edge id="28879" label="WP_045196822_2 (pp) WP_096287923_1" source="2521" target="2547" cy:directed="1"/>
      <edge id="28878" label="WP_045196822_2 (pp) WP_083467034_1" source="2521" target="2525" cy:directed="1"/>
      <edge id="28877" label="WP_045196822_2 (pp) WP_090858762_1" source="2521" target="2546" cy:directed="1"/>
      <edge id="28876" label="WP_045196822_2 (pp) WP_105672644_2" source="2521" target="2524" cy:directed="1"/>
      <edge id="28875" label="WP_045196822_2 (pp) WP_017594221_1" source="2521" target="2523" cy:directed="1"/>
      <edge id="28874" label="WP_045196822_2 (pp) WP_015613007_1" source="2521" target="2522" cy:directed="1"/>
      <edge id="28873" label="WP_045196822_2 (pp) WP_038682890_3" source="2521" target="2520" cy:directed="1"/>
      <edge id="28872" label="WP_045196822_2 (pp) WP_110470681_1" source="2521" target="2517" cy:directed="1"/>
      <edge id="28871" label="WP_045196822_2 (pp) WP_037939130_1" source="2521" target="2516" cy:directed="1"/>
      <edge id="28870" label="WP_045196822_2 (pp) WP_064722319_1" source="2521" target="2513" cy:directed="1"/>
      <edge id="28869" label="WP_045196822_2 (pp) WP_093766414_4" source="2521" target="2510" cy:directed="1"/>
      <edge id="28868" label="WP_045196822_2 (pp) WP_114400345_1" source="2521" target="2511" cy:directed="1"/>
      <edge id="28867" label="WP_045196822_2 (pp) WP_078760898_1" source="2521" target="2509" cy:directed="1"/>
      <edge id="28866" label="WP_045196822_2 (pp) WP_053556805_1" source="2521" target="2507" cy:directed="1"/>
      <edge id="28865" label="WP_045196822_2 (pp) WP_115920406_2" source="2521" target="2545" cy:directed="1"/>
      <edge id="28864" label="WP_045196822_2 (pp) WP_093355673_1" source="2521" target="2505" cy:directed="1"/>
      <edge id="28863" label="WP_045196822_2 (pp) ALG08515_1" source="2521" target="2544" cy:directed="1"/>
      <edge id="28862" label="WP_045196822_2 (pp) WP_071934999_2" source="2521" target="2503" cy:directed="1"/>
      <edge id="28861" label="WP_045196822_2 (pp) WP_087767686_1" source="2521" target="2502" cy:directed="1"/>
      <edge id="28860" label="WP_045196822_2 (pp) OQO95173_1" source="2521" target="2501" cy:directed="1"/>
      <edge id="28859" label="WP_045196822_2 (pp) WP_018847808_1" source="2521" target="2499" cy:directed="1"/>
      <edge id="28858" label="WP_045196822_2 (pp) WP_123813761_1" source="2521" target="2496" cy:directed="1"/>
      <edge id="28857" label="WP_045196822_2 (pp) OLO29347_1" source="2521" target="2495" cy:directed="1"/>
      <edge id="28856" label="WP_045196822_2 (pp) WP_113689373_1" source="2521" target="2493" cy:directed="1"/>
      <edge id="28855" label="WP_045196822_2 (pp) WP_121830363_1" source="2521" target="2543" cy:directed="1"/>
      <edge id="28854" label="WP_045196822_2 (pp) RLV71217_1" source="2521" target="2491" cy:directed="1"/>
      <edge id="28853" label="WP_045196822_2 (pp) WP_097634704_1" source="2521" target="2490" cy:directed="1"/>
      <edge id="28852" label="WP_045196822_2 (pp) WP_107004474_1" source="2521" target="2542" cy:directed="1"/>
      <edge id="28851" label="WP_045196822_2 (pp) WP_083753877_2" source="2521" target="2488" cy:directed="1"/>
      <edge id="28850" label="WP_045196822_2 (pp) WP_081907113_1" source="2521" target="2541" cy:directed="1"/>
      <edge id="28849" label="WP_045196822_2 (pp) WP_084252732_3" source="2521" target="2485" cy:directed="1"/>
      <edge id="28848" label="WP_045196822_2 (pp) SJZ81173_1" source="2521" target="2484" cy:directed="1"/>
      <edge id="28847" label="WP_045196822_2 (pp) WP_103467468_1" source="2521" target="2483" cy:directed="1"/>
      <edge id="28846" label="WP_045196822_2 (pp) WP_033300563_1" source="2521" target="2482" cy:directed="1"/>
      <edge id="28845" label="WP_045196822_2 (pp) WP_078612341_1" source="2521" target="2480" cy:directed="1"/>
      <edge id="28844" label="WP_045196822_2 (pp) WP_059008183_2" source="2521" target="2479" cy:directed="1"/>
      <edge id="28843" label="WP_045196822_2 (pp) WP_073876556_1" source="2521" target="2540" cy:directed="1"/>
      <edge id="28842" label="WP_045196822_2 (pp) WP_008409979_1" source="2521" target="2478" cy:directed="1"/>
      <edge id="28841" label="WP_045196822_2 (pp) WP_116112318_1" source="2521" target="2477" cy:directed="1"/>
      <edge id="28840" label="WP_045196822_2 (pp) WP_031002210_2" source="2521" target="2476" cy:directed="1"/>
      <edge id="28839" label="WP_045196822_2 (pp) WP_015100718_1" source="2521" target="2474" cy:directed="1"/>
      <edge id="28838" label="WP_045196822_2 (pp) ALC19908_1" source="2521" target="2475" cy:directed="1"/>
      <edge id="28837" label="WP_045196822_2 (pp) WP_006501818_1" source="2521" target="2473" cy:directed="1"/>
      <edge id="28836" label="WP_045196822_2 (pp) WP_055689909_1" source="2521" target="2472" cy:directed="1"/>
      <edge id="28835" label="WP_045196822_2 (pp) WP_109186559_1" source="2521" target="2468" cy:directed="1"/>
      <edge id="28834" label="WP_045196822_2 (pp) SED75494_1" source="2521" target="2467" cy:directed="1"/>
      <edge id="28833" label="WP_045196822_2 (pp) WP_111250567_1" source="2521" target="2466" cy:directed="1"/>
      <edge id="28832" label="WP_045196822_2 (pp) WP_053623192_1" source="2521" target="2539" cy:directed="1"/>
      <edge id="28831" label="WP_045196822_2 (pp) WP_062924764_1" source="2521" target="2464" cy:directed="1"/>
      <edge id="28830" label="WP_045196822_2 (pp) WP_105527259_1" source="2521" target="2462" cy:directed="1"/>
      <edge id="28829" label="WP_045196822_2 (pp) WP_048574296_1" source="2521" target="2461" cy:directed="1"/>
      <edge id="28828" label="WP_045196822_2 (pp) WP_052852666_2" source="2521" target="2460" cy:directed="1"/>
      <edge id="28827" label="WP_045196822_2 (pp) WP_066976558_1" source="2521" target="2459" cy:directed="1"/>
      <edge id="28826" label="WP_045196822_2 (pp) RPK87717_1" source="2521" target="2538" cy:directed="1"/>
      <edge id="28825" label="WP_045196822_2 (pp) WP_081663146_1" source="2521" target="2457" cy:directed="1"/>
      <edge id="28824" label="WP_045196822_2 (pp) WP_116951408_3" source="2521" target="2537" cy:directed="1"/>
      <edge id="28823" label="WP_045196822_2 (pp) WP_077689962_1" source="2521" target="2454" cy:directed="1"/>
      <edge id="28822" label="WP_045196822_2 (pp) WP_129802804_1" source="2521" target="2536" cy:directed="1"/>
      <edge id="28821" label="WP_045196822_2 (pp) WP_056298480_2" source="2521" target="2368" cy:directed="1"/>
      <edge id="28820" label="WP_045196822_2 (pp) WP_028327189_1" source="2521" target="2453" cy:directed="1"/>
      <edge id="28819" label="WP_045196822_2 (pp) EHM27670_1" source="2521" target="2535" cy:directed="1"/>
      <edge id="28818" label="WP_045196822_2 (pp) WP_070343622_1" source="2521" target="2451" cy:directed="1"/>
      <edge id="28817" label="WP_045196822_2 (pp) OKI46856_1" source="2521" target="2450" cy:directed="1"/>
      <edge id="28816" label="WP_045196822_2 (pp) WP_010048307_1" source="2521" target="2447" cy:directed="1"/>
      <edge id="28815" label="WP_045196822_2 (pp) WP_030701973_1" source="2521" target="2446" cy:directed="1"/>
      <edge id="28814" label="WP_045196822_2 (pp) WP_033318793_2" source="2521" target="2445" cy:directed="1"/>
      <edge id="28813" label="WP_045196822_2 (pp) WP_112271410_1" source="2521" target="2443" cy:directed="1"/>
      <edge id="28812" label="WP_038682890_3 (pp) ONI75210_2" source="2520" target="2552" cy:directed="1"/>
      <edge id="28811" label="WP_038682890_3 (pp) WP_086780456_1" source="2520" target="2551" cy:directed="1"/>
      <edge id="28810" label="WP_038682890_3 (pp) WP_040271779_1" source="2520" target="2553" cy:directed="1"/>
      <edge id="28809" label="WP_038682890_3 (pp) WP_067284698_3" source="2520" target="2533" cy:directed="1"/>
      <edge id="28808" label="WP_038682890_3 (pp) WP_027743449_4" source="2520" target="2532" cy:directed="1"/>
      <edge id="28807" label="WP_038682890_3 (pp) WP_125937921_2" source="2520" target="2549" cy:directed="1"/>
      <edge id="28806" label="WP_038682890_3 (pp) WP_110343524_1" source="2520" target="2530" cy:directed="1"/>
      <edge id="28805" label="WP_038682890_3 (pp) WP_081761968_1" source="2520" target="2548" cy:directed="1"/>
      <edge id="28804" label="WP_038682890_3 (pp) WP_130451801_3" source="2520" target="2529" cy:directed="1"/>
      <edge id="28803" label="WP_038682890_3 (pp) WP_084752844_1" source="2520" target="2528" cy:directed="1"/>
      <edge id="28802" label="WP_038682890_3 (pp) WP_006350677_1" source="2520" target="2527" cy:directed="1"/>
      <edge id="28801" label="WP_038682890_3 (pp) WP_096287923_1" source="2520" target="2547" cy:directed="1"/>
      <edge id="28800" label="WP_038682890_3 (pp) WP_083467034_1" source="2520" target="2525" cy:directed="1"/>
      <edge id="28799" label="WP_038682890_3 (pp) WP_090858762_1" source="2520" target="2546" cy:directed="1"/>
      <edge id="28798" label="WP_038682890_3 (pp) WP_017594221_1" source="2520" target="2523" cy:directed="1"/>
      <edge id="28797" label="WP_038682890_3 (pp) WP_110470681_1" source="2520" target="2517" cy:directed="1"/>
      <edge id="28796" label="WP_038682890_3 (pp) WP_037939130_1" source="2520" target="2516" cy:directed="1"/>
      <edge id="28795" label="WP_038682890_3 (pp) WP_064722319_1" source="2520" target="2513" cy:directed="1"/>
      <edge id="28794" label="WP_038682890_3 (pp) WP_093766414_4" source="2520" target="2510" cy:directed="1"/>
      <edge id="28793" label="WP_038682890_3 (pp) WP_114400345_1" source="2520" target="2511" cy:directed="1"/>
      <edge id="28792" label="WP_038682890_3 (pp) WP_078760898_1" source="2520" target="2509" cy:directed="1"/>
      <edge id="28791" label="WP_038682890_3 (pp) WP_053556805_1" source="2520" target="2507" cy:directed="1"/>
      <edge id="28790" label="WP_038682890_3 (pp) WP_115920406_2" source="2520" target="2545" cy:directed="1"/>
      <edge id="28789" label="WP_038682890_3 (pp) WP_093355673_1" source="2520" target="2505" cy:directed="1"/>
      <edge id="28788" label="WP_038682890_3 (pp) ALG08515_1" source="2520" target="2544" cy:directed="1"/>
      <edge id="28787" label="WP_038682890_3 (pp) WP_087767686_1" source="2520" target="2502" cy:directed="1"/>
      <edge id="28786" label="WP_038682890_3 (pp) CAQ01680_1" source="2520" target="2396" cy:directed="1"/>
      <edge id="28785" label="WP_038682890_3 (pp) OQO95173_1" source="2520" target="2501" cy:directed="1"/>
      <edge id="28784" label="WP_038682890_3 (pp) WP_018847808_1" source="2520" target="2499" cy:directed="1"/>
      <edge id="28783" label="WP_038682890_3 (pp) OLO29347_1" source="2520" target="2495" cy:directed="1"/>
      <edge id="28782" label="WP_038682890_3 (pp) WP_121830363_1" source="2520" target="2543" cy:directed="1"/>
      <edge id="28781" label="WP_038682890_3 (pp) WP_097634704_1" source="2520" target="2490" cy:directed="1"/>
      <edge id="28780" label="WP_038682890_3 (pp) WP_107004474_1" source="2520" target="2542" cy:directed="1"/>
      <edge id="28779" label="WP_038682890_3 (pp) WP_083753877_2" source="2520" target="2488" cy:directed="1"/>
      <edge id="28778" label="WP_038682890_3 (pp) WP_081907113_1" source="2520" target="2541" cy:directed="1"/>
      <edge id="28777" label="WP_038682890_3 (pp) WP_084252732_3" source="2520" target="2485" cy:directed="1"/>
      <edge id="28776" label="WP_038682890_3 (pp) WP_033300563_1" source="2520" target="2482" cy:directed="1"/>
      <edge id="28775" label="WP_038682890_3 (pp) WP_059008183_2" source="2520" target="2479" cy:directed="1"/>
      <edge id="28774" label="WP_038682890_3 (pp) WP_073876556_1" source="2520" target="2540" cy:directed="1"/>
      <edge id="28773" label="WP_038682890_3 (pp) WP_008409979_1" source="2520" target="2478" cy:directed="1"/>
      <edge id="28772" label="WP_038682890_3 (pp) WP_116112318_1" source="2520" target="2477" cy:directed="1"/>
      <edge id="28771" label="WP_038682890_3 (pp) WP_031002210_2" source="2520" target="2476" cy:directed="1"/>
      <edge id="28770" label="WP_038682890_3 (pp) WP_015100718_1" source="2520" target="2474" cy:directed="1"/>
      <edge id="28769" label="WP_038682890_3 (pp) WP_006501818_1" source="2520" target="2473" cy:directed="1"/>
      <edge id="28768" label="WP_038682890_3 (pp) WP_109186559_1" source="2520" target="2468" cy:directed="1"/>
      <edge id="28767" label="WP_038682890_3 (pp) SED75494_1" source="2520" target="2467" cy:directed="1"/>
      <edge id="28766" label="WP_038682890_3 (pp) WP_062924764_1" source="2520" target="2464" cy:directed="1"/>
      <edge id="28765" label="WP_038682890_3 (pp) WP_053623192_1" source="2520" target="2539" cy:directed="1"/>
      <edge id="28764" label="WP_038682890_3 (pp) WP_105527259_1" source="2520" target="2462" cy:directed="1"/>
      <edge id="28763" label="WP_038682890_3 (pp) WP_048574296_1" source="2520" target="2461" cy:directed="1"/>
      <edge id="28762" label="WP_038682890_3 (pp) WP_052852666_2" source="2520" target="2460" cy:directed="1"/>
      <edge id="28761" label="WP_038682890_3 (pp) WP_066976558_1" source="2520" target="2459" cy:directed="1"/>
      <edge id="28760" label="WP_038682890_3 (pp) RPK87717_1" source="2520" target="2538" cy:directed="1"/>
      <edge id="28759" label="WP_038682890_3 (pp) WP_081663146_1" source="2520" target="2457" cy:directed="1"/>
      <edge id="28758" label="WP_038682890_3 (pp) WP_116951408_3" source="2520" target="2537" cy:directed="1"/>
      <edge id="28757" label="WP_038682890_3 (pp) WP_077689962_1" source="2520" target="2454" cy:directed="1"/>
      <edge id="28756" label="WP_038682890_3 (pp) WP_129802804_1" source="2520" target="2536" cy:directed="1"/>
      <edge id="28755" label="WP_038682890_3 (pp) WP_056298480_2" source="2520" target="2368" cy:directed="1"/>
      <edge id="28754" label="WP_038682890_3 (pp) EHM27670_1" source="2520" target="2535" cy:directed="1"/>
      <edge id="28753" label="WP_038682890_3 (pp) WP_070343622_1" source="2520" target="2451" cy:directed="1"/>
      <edge id="28752" label="WP_038682890_3 (pp) OKI46856_1" source="2520" target="2450" cy:directed="1"/>
      <edge id="28751" label="WP_038682890_3 (pp) WP_010048307_1" source="2520" target="2447" cy:directed="1"/>
      <edge id="28750" label="WP_038682890_3 (pp) WP_030701973_1" source="2520" target="2446" cy:directed="1"/>
      <edge id="28749" label="WP_038682890_3 (pp) WP_033318793_2" source="2520" target="2445" cy:directed="1"/>
      <edge id="28748" label="WP_038682890_3 (pp) WP_112271410_1" source="2520" target="2443" cy:directed="1"/>
      <edge id="28747" label="WP_073770697_1 (pp) ONI75210_2" source="2519" target="2552" cy:directed="1"/>
      <edge id="28746" label="WP_073770697_1 (pp) WP_086780456_1" source="2519" target="2551" cy:directed="1"/>
      <edge id="28745" label="WP_073770697_1 (pp) WP_040271779_1" source="2519" target="2553" cy:directed="1"/>
      <edge id="28744" label="WP_073770697_1 (pp) WP_067284698_3" source="2519" target="2533" cy:directed="1"/>
      <edge id="28743" label="WP_073770697_1 (pp) WP_055876321_1" source="2519" target="2550" cy:directed="1"/>
      <edge id="28742" label="WP_073770697_1 (pp) WP_027743449_4" source="2519" target="2532" cy:directed="1"/>
      <edge id="28741" label="WP_073770697_1 (pp) WP_125937921_2" source="2519" target="2549" cy:directed="1"/>
      <edge id="28740" label="WP_073770697_1 (pp) WP_017627596_1" source="2519" target="2531" cy:directed="1"/>
      <edge id="28739" label="WP_073770697_1 (pp) WP_110343524_1" source="2519" target="2530" cy:directed="1"/>
      <edge id="28738" label="WP_073770697_1 (pp) WP_081761968_1" source="2519" target="2548" cy:directed="1"/>
      <edge id="28737" label="WP_073770697_1 (pp) WP_130451801_3" source="2519" target="2529" cy:directed="1"/>
      <edge id="28736" label="WP_073770697_1 (pp) WP_084752844_1" source="2519" target="2528" cy:directed="1"/>
      <edge id="28735" label="WP_073770697_1 (pp) WP_006350677_1" source="2519" target="2527" cy:directed="1"/>
      <edge id="28734" label="WP_073770697_1 (pp) WP_096287923_1" source="2519" target="2547" cy:directed="1"/>
      <edge id="28733" label="WP_073770697_1 (pp) WP_083467034_1" source="2519" target="2525" cy:directed="1"/>
      <edge id="28732" label="WP_073770697_1 (pp) WP_090858762_1" source="2519" target="2546" cy:directed="1"/>
      <edge id="28731" label="WP_073770697_1 (pp) WP_105672644_2" source="2519" target="2524" cy:directed="1"/>
      <edge id="28730" label="WP_073770697_1 (pp) WP_017594221_1" source="2519" target="2523" cy:directed="1"/>
      <edge id="28729" label="WP_073770697_1 (pp) WP_015613007_1" source="2519" target="2522" cy:directed="1"/>
      <edge id="28728" label="WP_073770697_1 (pp) WP_045196822_2" source="2519" target="2521" cy:directed="1"/>
      <edge id="28727" label="WP_073770697_1 (pp) WP_038682890_3" source="2519" target="2520" cy:directed="1"/>
      <edge id="28726" label="WP_073770697_1 (pp) WP_110470681_1" source="2519" target="2517" cy:directed="1"/>
      <edge id="28725" label="WP_073770697_1 (pp) WP_037939130_1" source="2519" target="2516" cy:directed="1"/>
      <edge id="28724" label="WP_073770697_1 (pp) WP_061787600_2" source="2519" target="2515" cy:directed="1"/>
      <edge id="28723" label="WP_073770697_1 (pp) WP_064722319_1" source="2519" target="2513" cy:directed="1"/>
      <edge id="28722" label="WP_073770697_1 (pp) WP_114400345_1" source="2519" target="2511" cy:directed="1"/>
      <edge id="28721" label="WP_073770697_1 (pp) WP_093766414_4" source="2519" target="2510" cy:directed="1"/>
      <edge id="28720" label="WP_073770697_1 (pp) WP_078760898_1" source="2519" target="2509" cy:directed="1"/>
      <edge id="28719" label="WP_073770697_1 (pp) WP_073815370_1" source="2519" target="2508" cy:directed="1"/>
      <edge id="28718" label="WP_073770697_1 (pp) WP_053556805_1" source="2519" target="2507" cy:directed="1"/>
      <edge id="28717" label="WP_073770697_1 (pp) WP_115920406_2" source="2519" target="2545" cy:directed="1"/>
      <edge id="28716" label="WP_073770697_1 (pp) WP_093355673_1" source="2519" target="2505" cy:directed="1"/>
      <edge id="28715" label="WP_073770697_1 (pp) ALG08515_1" source="2519" target="2544" cy:directed="1"/>
      <edge id="28714" label="WP_073770697_1 (pp) WP_071934999_2" source="2519" target="2503" cy:directed="1"/>
      <edge id="28713" label="WP_073770697_1 (pp) WP_087767686_1" source="2519" target="2502" cy:directed="1"/>
      <edge id="28712" label="WP_073770697_1 (pp) OQO95173_1" source="2519" target="2501" cy:directed="1"/>
      <edge id="28711" label="WP_073770697_1 (pp) WP_029987712_1" source="2519" target="2500" cy:directed="1"/>
      <edge id="28710" label="WP_073770697_1 (pp) WP_018847808_1" source="2519" target="2499" cy:directed="1"/>
      <edge id="28709" label="WP_073770697_1 (pp) KWX01007_1" source="2519" target="2498" cy:directed="1"/>
      <edge id="28708" label="WP_073770697_1 (pp) WP_123813761_1" source="2519" target="2496" cy:directed="1"/>
      <edge id="28707" label="WP_073770697_1 (pp) OLO29347_1" source="2519" target="2495" cy:directed="1"/>
      <edge id="28706" label="WP_073770697_1 (pp) WP_113689373_1" source="2519" target="2493" cy:directed="1"/>
      <edge id="28705" label="WP_073770697_1 (pp) WP_121830363_1" source="2519" target="2543" cy:directed="1"/>
      <edge id="28704" label="WP_073770697_1 (pp) RLV71217_1" source="2519" target="2491" cy:directed="1"/>
      <edge id="28703" label="WP_073770697_1 (pp) WP_107004474_1" source="2519" target="2542" cy:directed="1"/>
      <edge id="28702" label="WP_073770697_1 (pp) WP_097634704_1" source="2519" target="2490" cy:directed="1"/>
      <edge id="28701" label="WP_073770697_1 (pp) PXY18584_1" source="2519" target="2489" cy:directed="1"/>
      <edge id="28700" label="WP_073770697_1 (pp) WP_083753877_2" source="2519" target="2488" cy:directed="1"/>
      <edge id="28699" label="WP_073770697_1 (pp) WP_109162285_1" source="2519" target="2487" cy:directed="1"/>
      <edge id="28698" label="WP_073770697_1 (pp) WP_081907113_1" source="2519" target="2541" cy:directed="1"/>
      <edge id="28697" label="WP_073770697_1 (pp) WP_084252732_3" source="2519" target="2485" cy:directed="1"/>
      <edge id="28696" label="WP_073770697_1 (pp) SJZ81173_1" source="2519" target="2484" cy:directed="1"/>
      <edge id="28695" label="WP_073770697_1 (pp) WP_103467468_1" source="2519" target="2483" cy:directed="1"/>
      <edge id="28694" label="WP_073770697_1 (pp) WP_033300563_1" source="2519" target="2482" cy:directed="1"/>
      <edge id="28693" label="WP_073770697_1 (pp) WP_078612341_1" source="2519" target="2480" cy:directed="1"/>
      <edge id="28692" label="WP_073770697_1 (pp) WP_059008183_2" source="2519" target="2479" cy:directed="1"/>
      <edge id="28691" label="WP_073770697_1 (pp) WP_073876556_1" source="2519" target="2540" cy:directed="1"/>
      <edge id="28690" label="WP_073770697_1 (pp) WP_008409979_1" source="2519" target="2478" cy:directed="1"/>
      <edge id="28689" label="WP_073770697_1 (pp) WP_116112318_1" source="2519" target="2477" cy:directed="1"/>
      <edge id="28688" label="WP_073770697_1 (pp) WP_031002210_2" source="2519" target="2476" cy:directed="1"/>
      <edge id="28687" label="WP_073770697_1 (pp) ALC19908_1" source="2519" target="2475" cy:directed="1"/>
      <edge id="28686" label="WP_073770697_1 (pp) WP_015100718_1" source="2519" target="2474" cy:directed="1"/>
      <edge id="28685" label="WP_073770697_1 (pp) WP_006501818_1" source="2519" target="2473" cy:directed="1"/>
      <edge id="28684" label="WP_073770697_1 (pp) WP_055689909_1" source="2519" target="2472" cy:directed="1"/>
      <edge id="28683" label="WP_073770697_1 (pp) WP_105722094_1" source="2519" target="2469" cy:directed="1"/>
      <edge id="28682" label="WP_073770697_1 (pp) WP_109186559_1" source="2519" target="2468" cy:directed="1"/>
      <edge id="28681" label="WP_073770697_1 (pp) SED75494_1" source="2519" target="2467" cy:directed="1"/>
      <edge id="28680" label="WP_073770697_1 (pp) WP_111250567_1" source="2519" target="2466" cy:directed="1"/>
      <edge id="28679" label="WP_073770697_1 (pp) WP_062924764_1" source="2519" target="2464" cy:directed="1"/>
      <edge id="28678" label="WP_073770697_1 (pp) WP_053623192_1" source="2519" target="2539" cy:directed="1"/>
      <edge id="28677" label="WP_073770697_1 (pp) WP_105527259_1" source="2519" target="2462" cy:directed="1"/>
      <edge id="28676" label="WP_073770697_1 (pp) WP_048574296_1" source="2519" target="2461" cy:directed="1"/>
      <edge id="28675" label="WP_073770697_1 (pp) WP_052852666_2" source="2519" target="2460" cy:directed="1"/>
      <edge id="28674" label="WP_073770697_1 (pp) WP_066976558_1" source="2519" target="2459" cy:directed="1"/>
      <edge id="28673" label="WP_073770697_1 (pp) RPK87717_1" source="2519" target="2538" cy:directed="1"/>
      <edge id="28672" label="WP_073770697_1 (pp) WP_081663146_1" source="2519" target="2457" cy:directed="1"/>
      <edge id="28671" label="WP_073770697_1 (pp) WP_116951408_3" source="2519" target="2537" cy:directed="1"/>
      <edge id="28670" label="WP_073770697_1 (pp) WP_077689962_1" source="2519" target="2454" cy:directed="1"/>
      <edge id="28669" label="WP_073770697_1 (pp) WP_129802804_1" source="2519" target="2536" cy:directed="1"/>
      <edge id="28668" label="WP_073770697_1 (pp) WP_056298480_2" source="2519" target="2368" cy:directed="1"/>
      <edge id="28667" label="WP_073770697_1 (pp) WP_028327189_1" source="2519" target="2453" cy:directed="1"/>
      <edge id="28666" label="WP_073770697_1 (pp) EHM27670_1" source="2519" target="2535" cy:directed="1"/>
      <edge id="28665" label="WP_073770697_1 (pp) WP_070343622_1" source="2519" target="2451" cy:directed="1"/>
      <edge id="28664" label="WP_073770697_1 (pp) OKI46856_1" source="2519" target="2450" cy:directed="1"/>
      <edge id="28663" label="WP_073770697_1 (pp) WP_125509413_1" source="2519" target="2449" cy:directed="1"/>
      <edge id="28662" label="WP_073770697_1 (pp) WP_010048307_1" source="2519" target="2447" cy:directed="1"/>
      <edge id="28661" label="WP_073770697_1 (pp) WP_030701973_1" source="2519" target="2446" cy:directed="1"/>
      <edge id="28660" label="WP_073770697_1 (pp) WP_033318793_2" source="2519" target="2445" cy:directed="1"/>
      <edge id="28659" label="WP_073770697_1 (pp) WP_112271410_1" source="2519" target="2443" cy:directed="1"/>
      <edge id="28658" label="WP_089597075_1 (pp) ONI75210_2" source="2518" target="2552" cy:directed="1"/>
      <edge id="28657" label="WP_089597075_1 (pp) WP_086780456_1" source="2518" target="2551" cy:directed="1"/>
      <edge id="28656" label="WP_089597075_1 (pp) WP_040271779_1" source="2518" target="2553" cy:directed="1"/>
      <edge id="28655" label="WP_089597075_1 (pp) WP_067284698_3" source="2518" target="2533" cy:directed="1"/>
      <edge id="28654" label="WP_089597075_1 (pp) WP_027743449_4" source="2518" target="2532" cy:directed="1"/>
      <edge id="28653" label="WP_089597075_1 (pp) WP_055876321_1" source="2518" target="2550" cy:directed="1"/>
      <edge id="28652" label="WP_089597075_1 (pp) WP_125937921_2" source="2518" target="2549" cy:directed="1"/>
      <edge id="28651" label="WP_089597075_1 (pp) WP_017627596_1" source="2518" target="2531" cy:directed="1"/>
      <edge id="28650" label="WP_089597075_1 (pp) WP_110343524_1" source="2518" target="2530" cy:directed="1"/>
      <edge id="28649" label="WP_089597075_1 (pp) WP_081761968_1" source="2518" target="2548" cy:directed="1"/>
      <edge id="28648" label="WP_089597075_1 (pp) WP_130451801_3" source="2518" target="2529" cy:directed="1"/>
      <edge id="28647" label="WP_089597075_1 (pp) WP_084752844_1" source="2518" target="2528" cy:directed="1"/>
      <edge id="28646" label="WP_089597075_1 (pp) WP_006350677_1" source="2518" target="2527" cy:directed="1"/>
      <edge id="28645" label="WP_089597075_1 (pp) WP_094931980_2" source="2518" target="2526" cy:directed="1"/>
      <edge id="28644" label="WP_089597075_1 (pp) WP_096287923_1" source="2518" target="2547" cy:directed="1"/>
      <edge id="28643" label="WP_089597075_1 (pp) WP_083467034_1" source="2518" target="2525" cy:directed="1"/>
      <edge id="28642" label="WP_089597075_1 (pp) WP_090858762_1" source="2518" target="2546" cy:directed="1"/>
      <edge id="28641" label="WP_089597075_1 (pp) WP_105672644_2" source="2518" target="2524" cy:directed="1"/>
      <edge id="28640" label="WP_089597075_1 (pp) WP_017594221_1" source="2518" target="2523" cy:directed="1"/>
      <edge id="28639" label="WP_089597075_1 (pp) WP_015613007_1" source="2518" target="2522" cy:directed="1"/>
      <edge id="28638" label="WP_089597075_1 (pp) WP_045196822_2" source="2518" target="2521" cy:directed="1"/>
      <edge id="28637" label="WP_089597075_1 (pp) WP_038682890_3" source="2518" target="2520" cy:directed="1"/>
      <edge id="28636" label="WP_089597075_1 (pp) WP_073770697_1" source="2518" target="2519" cy:directed="1"/>
      <edge id="28635" label="WP_089597075_1 (pp) WP_110470681_1" source="2518" target="2517" cy:directed="1"/>
      <edge id="28634" label="WP_089597075_1 (pp) WP_037939130_1" source="2518" target="2516" cy:directed="1"/>
      <edge id="28633" label="WP_089597075_1 (pp) WP_064722319_1" source="2518" target="2513" cy:directed="1"/>
      <edge id="28632" label="WP_089597075_1 (pp) WP_114400345_1" source="2518" target="2511" cy:directed="1"/>
      <edge id="28631" label="WP_089597075_1 (pp) WP_093766414_4" source="2518" target="2510" cy:directed="1"/>
      <edge id="28630" label="WP_089597075_1 (pp) WP_078760898_1" source="2518" target="2509" cy:directed="1"/>
      <edge id="28629" label="WP_089597075_1 (pp) WP_073815370_1" source="2518" target="2508" cy:directed="1"/>
      <edge id="28628" label="WP_089597075_1 (pp) WP_053556805_1" source="2518" target="2507" cy:directed="1"/>
      <edge id="28627" label="WP_089597075_1 (pp) WP_115920406_2" source="2518" target="2545" cy:directed="1"/>
      <edge id="28626" label="WP_089597075_1 (pp) WP_093355673_1" source="2518" target="2505" cy:directed="1"/>
      <edge id="28625" label="WP_089597075_1 (pp) ALE78105_1" source="2518" target="2383" cy:directed="1"/>
      <edge id="28624" label="WP_089597075_1 (pp) ALG08515_1" source="2518" target="2544" cy:directed="1"/>
      <edge id="28623" label="WP_089597075_1 (pp) OKI12399_1" source="2518" target="2504" cy:directed="1"/>
      <edge id="28622" label="WP_089597075_1 (pp) WP_071934999_2" source="2518" target="2503" cy:directed="1"/>
      <edge id="28621" label="WP_089597075_1 (pp) WP_087767686_1" source="2518" target="2502" cy:directed="1"/>
      <edge id="28620" label="WP_089597075_1 (pp) OQO95173_1" source="2518" target="2501" cy:directed="1"/>
      <edge id="28619" label="WP_089597075_1 (pp) WP_029987712_1" source="2518" target="2500" cy:directed="1"/>
      <edge id="28618" label="WP_089597075_1 (pp) WP_018847808_1" source="2518" target="2499" cy:directed="1"/>
      <edge id="28617" label="WP_089597075_1 (pp) KWX01007_1" source="2518" target="2498" cy:directed="1"/>
      <edge id="28616" label="WP_089597075_1 (pp) WP_123813761_1" source="2518" target="2496" cy:directed="1"/>
      <edge id="28615" label="WP_089597075_1 (pp) OLO29347_1" source="2518" target="2495" cy:directed="1"/>
      <edge id="28614" label="WP_089597075_1 (pp) WP_113689373_1" source="2518" target="2493" cy:directed="1"/>
      <edge id="28613" label="WP_089597075_1 (pp) WP_095752644_1" source="2518" target="2492" cy:directed="1"/>
      <edge id="28612" label="WP_089597075_1 (pp) WP_121830363_1" source="2518" target="2543" cy:directed="1"/>
      <edge id="28611" label="WP_089597075_1 (pp) RLV71217_1" source="2518" target="2491" cy:directed="1"/>
      <edge id="28610" label="WP_089597075_1 (pp) WP_107004474_1" source="2518" target="2542" cy:directed="1"/>
      <edge id="28609" label="WP_089597075_1 (pp) WP_097634704_1" source="2518" target="2490" cy:directed="1"/>
      <edge id="28608" label="WP_089597075_1 (pp) PXY18584_1" source="2518" target="2489" cy:directed="1"/>
      <edge id="28607" label="WP_089597075_1 (pp) WP_083753877_2" source="2518" target="2488" cy:directed="1"/>
      <edge id="28606" label="WP_089597075_1 (pp) WP_109162285_1" source="2518" target="2487" cy:directed="1"/>
      <edge id="28605" label="WP_089597075_1 (pp) KKI16967_3" source="2518" target="2486" cy:directed="1"/>
      <edge id="28604" label="WP_089597075_1 (pp) WP_081907113_1" source="2518" target="2541" cy:directed="1"/>
      <edge id="28603" label="WP_089597075_1 (pp) WP_084252732_3" source="2518" target="2485" cy:directed="1"/>
      <edge id="28602" label="WP_089597075_1 (pp) SJZ81173_1" source="2518" target="2484" cy:directed="1"/>
      <edge id="28601" label="WP_089597075_1 (pp) WP_103467468_1" source="2518" target="2483" cy:directed="1"/>
      <edge id="28600" label="WP_089597075_1 (pp) WP_033300563_1" source="2518" target="2482" cy:directed="1"/>
      <edge id="28599" label="WP_089597075_1 (pp) WP_058632033_1" source="2518" target="2481" cy:directed="1"/>
      <edge id="28598" label="WP_089597075_1 (pp) WP_078612341_1" source="2518" target="2480" cy:directed="1"/>
      <edge id="28597" label="WP_089597075_1 (pp) WP_059008183_2" source="2518" target="2479" cy:directed="1"/>
      <edge id="28596" label="WP_089597075_1 (pp) WP_073876556_1" source="2518" target="2540" cy:directed="1"/>
      <edge id="28595" label="WP_089597075_1 (pp) WP_008409979_1" source="2518" target="2478" cy:directed="1"/>
      <edge id="28594" label="WP_089597075_1 (pp) WP_116112318_1" source="2518" target="2477" cy:directed="1"/>
      <edge id="28593" label="WP_089597075_1 (pp) WP_031002210_2" source="2518" target="2476" cy:directed="1"/>
      <edge id="28592" label="WP_089597075_1 (pp) ALC19908_1" source="2518" target="2475" cy:directed="1"/>
      <edge id="28591" label="WP_089597075_1 (pp) WP_015100718_1" source="2518" target="2474" cy:directed="1"/>
      <edge id="28590" label="WP_089597075_1 (pp) WP_006501818_1" source="2518" target="2473" cy:directed="1"/>
      <edge id="28589" label="WP_089597075_1 (pp) WP_055689909_1" source="2518" target="2472" cy:directed="1"/>
      <edge id="28588" label="WP_089597075_1 (pp) WP_121007506_1" source="2518" target="2471" cy:directed="1"/>
      <edge id="28587" label="WP_089597075_1 (pp) WP_058915320_1" source="2518" target="2470" cy:directed="1"/>
      <edge id="28586" label="WP_089597075_1 (pp) WP_105722094_1" source="2518" target="2469" cy:directed="1"/>
      <edge id="28585" label="WP_089597075_1 (pp) WP_109186559_1" source="2518" target="2468" cy:directed="1"/>
      <edge id="28584" label="WP_089597075_1 (pp) SED75494_1" source="2518" target="2467" cy:directed="1"/>
      <edge id="28583" label="WP_089597075_1 (pp) WP_111250567_1" source="2518" target="2466" cy:directed="1"/>
      <edge id="28582" label="WP_089597075_1 (pp) WP_053623192_1" source="2518" target="2539" cy:directed="1"/>
      <edge id="28581" label="WP_089597075_1 (pp) WP_062924764_1" source="2518" target="2464" cy:directed="1"/>
      <edge id="28580" label="WP_089597075_1 (pp) WP_093655900_5" source="2518" target="2463" cy:directed="1"/>
      <edge id="28579" label="WP_089597075_1 (pp) WP_105527259_1" source="2518" target="2462" cy:directed="1"/>
      <edge id="28578" label="WP_089597075_1 (pp) WP_052852666_2" source="2518" target="2460" cy:directed="1"/>
      <edge id="28577" label="WP_089597075_1 (pp) WP_048574296_1" source="2518" target="2461" cy:directed="1"/>
      <edge id="28576" label="WP_089597075_1 (pp) WP_066976558_1" source="2518" target="2459" cy:directed="1"/>
      <edge id="28575" label="WP_089597075_1 (pp) RPK87717_1" source="2518" target="2538" cy:directed="1"/>
      <edge id="28574" label="WP_089597075_1 (pp) WP_081663146_1" source="2518" target="2457" cy:directed="1"/>
      <edge id="28573" label="WP_089597075_1 (pp) WP_116951408_3" source="2518" target="2537" cy:directed="1"/>
      <edge id="28572" label="WP_089597075_1 (pp) WP_077689962_1" source="2518" target="2454" cy:directed="1"/>
      <edge id="28571" label="WP_089597075_1 (pp) WP_043461231_1" source="2518" target="2455" cy:directed="1"/>
      <edge id="28570" label="WP_089597075_1 (pp) WP_129802804_1" source="2518" target="2536" cy:directed="1"/>
      <edge id="28569" label="WP_089597075_1 (pp) WP_028327189_1" source="2518" target="2453" cy:directed="1"/>
      <edge id="28568" label="WP_089597075_1 (pp) EHM27670_1" source="2518" target="2535" cy:directed="1"/>
      <edge id="28567" label="WP_089597075_1 (pp) WP_016691947_2" source="2518" target="2452" cy:directed="1"/>
      <edge id="28566" label="WP_089597075_1 (pp) WP_070343622_1" source="2518" target="2451" cy:directed="1"/>
      <edge id="28565" label="WP_089597075_1 (pp) OKI46856_1" source="2518" target="2450" cy:directed="1"/>
      <edge id="28564" label="WP_089597075_1 (pp) WP_125509413_1" source="2518" target="2449" cy:directed="1"/>
      <edge id="28563" label="WP_089597075_1 (pp) CEL19833_1" source="2518" target="2448" cy:directed="1"/>
      <edge id="28562" label="WP_089597075_1 (pp) WP_010048307_1" source="2518" target="2447" cy:directed="1"/>
      <edge id="28561" label="WP_089597075_1 (pp) WP_030701973_1" source="2518" target="2446" cy:directed="1"/>
      <edge id="28560" label="WP_089597075_1 (pp) WP_033318793_2" source="2518" target="2445" cy:directed="1"/>
      <edge id="28559" label="WP_089597075_1 (pp) WP_083472659_1" source="2518" target="2444" cy:directed="1"/>
      <edge id="28558" label="WP_089597075_1 (pp) WP_112271410_1" source="2518" target="2443" cy:directed="1"/>
      <edge id="28557" label="WP_110470681_1 (pp) ONI75210_2" source="2517" target="2552" cy:directed="1"/>
      <edge id="28556" label="WP_110470681_1 (pp) WP_086780456_1" source="2517" target="2551" cy:directed="1"/>
      <edge id="28555" label="WP_110470681_1 (pp) WP_040271779_1" source="2517" target="2553" cy:directed="1"/>
      <edge id="28554" label="WP_110470681_1 (pp) WP_067284698_3" source="2517" target="2533" cy:directed="1"/>
      <edge id="28553" label="WP_110470681_1 (pp) WP_125937921_2" source="2517" target="2549" cy:directed="1"/>
      <edge id="28552" label="WP_110470681_1 (pp) WP_110343524_1" source="2517" target="2530" cy:directed="1"/>
      <edge id="28551" label="WP_110470681_1 (pp) WP_081761968_1" source="2517" target="2548" cy:directed="1"/>
      <edge id="28550" label="WP_110470681_1 (pp) WP_130451801_3" source="2517" target="2529" cy:directed="1"/>
      <edge id="28549" label="WP_110470681_1 (pp) WP_084752844_1" source="2517" target="2528" cy:directed="1"/>
      <edge id="28548" label="WP_110470681_1 (pp) WP_096287923_1" source="2517" target="2547" cy:directed="1"/>
      <edge id="28547" label="WP_110470681_1 (pp) WP_090858762_1" source="2517" target="2546" cy:directed="1"/>
      <edge id="28546" label="WP_110470681_1 (pp) WP_017594221_1" source="2517" target="2523" cy:directed="1"/>
      <edge id="28545" label="WP_110470681_1 (pp) WP_037939130_1" source="2517" target="2516" cy:directed="1"/>
      <edge id="28544" label="WP_110470681_1 (pp) WP_114400345_1" source="2517" target="2511" cy:directed="1"/>
      <edge id="28543" label="WP_110470681_1 (pp) WP_078760898_1" source="2517" target="2509" cy:directed="1"/>
      <edge id="28542" label="WP_110470681_1 (pp) WP_053556805_1" source="2517" target="2507" cy:directed="1"/>
      <edge id="28541" label="WP_110470681_1 (pp) WP_115920406_2" source="2517" target="2545" cy:directed="1"/>
      <edge id="28540" label="WP_110470681_1 (pp) WP_093355673_1" source="2517" target="2505" cy:directed="1"/>
      <edge id="28539" label="WP_110470681_1 (pp) ALG08515_1" source="2517" target="2544" cy:directed="1"/>
      <edge id="28538" label="WP_110470681_1 (pp) OQO95173_1" source="2517" target="2501" cy:directed="1"/>
      <edge id="28537" label="WP_110470681_1 (pp) WP_123813761_1" source="2517" target="2496" cy:directed="1"/>
      <edge id="28536" label="WP_110470681_1 (pp) WP_121830363_1" source="2517" target="2543" cy:directed="1"/>
      <edge id="28535" label="WP_110470681_1 (pp) WP_107004474_1" source="2517" target="2542" cy:directed="1"/>
      <edge id="28534" label="WP_110470681_1 (pp) WP_081907113_1" source="2517" target="2541" cy:directed="1"/>
      <edge id="28533" label="WP_110470681_1 (pp) WP_084252732_3" source="2517" target="2485" cy:directed="1"/>
      <edge id="28532" label="WP_110470681_1 (pp) WP_073876556_1" source="2517" target="2540" cy:directed="1"/>
      <edge id="28531" label="WP_110470681_1 (pp) WP_031002210_2" source="2517" target="2476" cy:directed="1"/>
      <edge id="28530" label="WP_110470681_1 (pp) WP_006501818_1" source="2517" target="2473" cy:directed="1"/>
      <edge id="28529" label="WP_110470681_1 (pp) WP_053623192_1" source="2517" target="2539" cy:directed="1"/>
      <edge id="28528" label="WP_110470681_1 (pp) WP_048574296_1" source="2517" target="2461" cy:directed="1"/>
      <edge id="28527" label="WP_110470681_1 (pp) WP_066976558_1" source="2517" target="2459" cy:directed="1"/>
      <edge id="28526" label="WP_110470681_1 (pp) RPK87717_1" source="2517" target="2538" cy:directed="1"/>
      <edge id="28525" label="WP_110470681_1 (pp) WP_081663146_1" source="2517" target="2457" cy:directed="1"/>
      <edge id="28524" label="WP_110470681_1 (pp) WP_116951408_3" source="2517" target="2537" cy:directed="1"/>
      <edge id="28523" label="WP_110470681_1 (pp) WP_056298480_2" source="2517" target="2368" cy:directed="1"/>
      <edge id="28522" label="WP_110470681_1 (pp) WP_129802804_1" source="2517" target="2536" cy:directed="1"/>
      <edge id="28521" label="WP_110470681_1 (pp) EHM27670_1" source="2517" target="2535" cy:directed="1"/>
      <edge id="28520" label="WP_110470681_1 (pp) WP_033318793_2" source="2517" target="2445" cy:directed="1"/>
      <edge id="28519" label="WP_037939130_1 (pp) ONI75210_2" source="2516" target="2552" cy:directed="1"/>
      <edge id="28518" label="WP_037939130_1 (pp) WP_086780456_1" source="2516" target="2551" cy:directed="1"/>
      <edge id="28517" label="WP_037939130_1 (pp) WP_040271779_1" source="2516" target="2553" cy:directed="1"/>
      <edge id="28516" label="WP_037939130_1 (pp) WP_067284698_3" source="2516" target="2533" cy:directed="1"/>
      <edge id="28515" label="WP_037939130_1 (pp) WP_055876321_1" source="2516" target="2550" cy:directed="1"/>
      <edge id="28514" label="WP_037939130_1 (pp) WP_125937921_2" source="2516" target="2549" cy:directed="1"/>
      <edge id="28513" label="WP_037939130_1 (pp) WP_081761968_1" source="2516" target="2548" cy:directed="1"/>
      <edge id="28512" label="WP_037939130_1 (pp) WP_130451801_3" source="2516" target="2529" cy:directed="1"/>
      <edge id="28511" label="WP_037939130_1 (pp) WP_096287923_1" source="2516" target="2547" cy:directed="1"/>
      <edge id="28510" label="WP_037939130_1 (pp) WP_090858762_1" source="2516" target="2546" cy:directed="1"/>
      <edge id="28509" label="WP_037939130_1 (pp) WP_017594221_1" source="2516" target="2523" cy:directed="1"/>
      <edge id="28508" label="WP_037939130_1 (pp) WP_115920406_2" source="2516" target="2545" cy:directed="1"/>
      <edge id="28507" label="WP_037939130_1 (pp) ALG08515_1" source="2516" target="2544" cy:directed="1"/>
      <edge id="28506" label="WP_037939130_1 (pp) WP_121830363_1" source="2516" target="2543" cy:directed="1"/>
      <edge id="28505" label="WP_037939130_1 (pp) WP_107004474_1" source="2516" target="2542" cy:directed="1"/>
      <edge id="28504" label="WP_037939130_1 (pp) WP_081907113_1" source="2516" target="2541" cy:directed="1"/>
      <edge id="28503" label="WP_037939130_1 (pp) WP_073876556_1" source="2516" target="2540" cy:directed="1"/>
      <edge id="28502" label="WP_037939130_1 (pp) WP_053623192_1" source="2516" target="2539" cy:directed="1"/>
      <edge id="28501" label="WP_037939130_1 (pp) RPK87717_1" source="2516" target="2538" cy:directed="1"/>
      <edge id="28500" label="WP_037939130_1 (pp) WP_116951408_3" source="2516" target="2537" cy:directed="1"/>
      <edge id="28499" label="WP_037939130_1 (pp) WP_129802804_1" source="2516" target="2536" cy:directed="1"/>
      <edge id="28498" label="WP_037939130_1 (pp) EHM27670_1" source="2516" target="2535" cy:directed="1"/>
      <edge id="28497" label="WP_061787600_2 (pp) WP_040271779_1" source="2515" target="2553" cy:directed="1"/>
      <edge id="28496" label="WP_061787600_2 (pp) WP_053623192_1" source="2515" target="2539" cy:directed="1"/>
      <edge id="28495" label="WP_061787600_2 (pp) WP_081907113_1" source="2515" target="2541" cy:directed="1"/>
      <edge id="28494" label="WP_061787600_2 (pp) RPK87717_1" source="2515" target="2538" cy:directed="1"/>
      <edge id="28493" label="WP_061787600_2 (pp) WP_081761968_1" source="2515" target="2548" cy:directed="1"/>
      <edge id="28492" label="WP_061787600_2 (pp) WP_017594221_1" source="2515" target="2523" cy:directed="1"/>
      <edge id="28491" label="WP_017558654_2 (pp) ONI75210_2" source="2514" target="2552" cy:directed="1"/>
      <edge id="28490" label="WP_017558654_2 (pp) WP_086780456_1" source="2514" target="2551" cy:directed="1"/>
      <edge id="28489" label="WP_017558654_2 (pp) WP_040271779_1" source="2514" target="2553" cy:directed="1"/>
      <edge id="28488" label="WP_017558654_2 (pp) WP_067284698_3" source="2514" target="2533" cy:directed="1"/>
      <edge id="28487" label="WP_017558654_2 (pp) WP_027743449_4" source="2514" target="2532" cy:directed="1"/>
      <edge id="28486" label="WP_017558654_2 (pp) WP_055876321_1" source="2514" target="2550" cy:directed="1"/>
      <edge id="28485" label="WP_017558654_2 (pp) WP_125937921_2" source="2514" target="2549" cy:directed="1"/>
      <edge id="28484" label="WP_017558654_2 (pp) WP_017627596_1" source="2514" target="2531" cy:directed="1"/>
      <edge id="28483" label="WP_017558654_2 (pp) WP_110343524_1" source="2514" target="2530" cy:directed="1"/>
      <edge id="28482" label="WP_017558654_2 (pp) WP_081761968_1" source="2514" target="2548" cy:directed="1"/>
      <edge id="28481" label="WP_017558654_2 (pp) WP_130451801_3" source="2514" target="2529" cy:directed="1"/>
      <edge id="28480" label="WP_017558654_2 (pp) WP_084752844_1" source="2514" target="2528" cy:directed="1"/>
      <edge id="28479" label="WP_017558654_2 (pp) WP_006350677_1" source="2514" target="2527" cy:directed="1"/>
      <edge id="28478" label="WP_017558654_2 (pp) WP_094931980_2" source="2514" target="2526" cy:directed="1"/>
      <edge id="28477" label="WP_017558654_2 (pp) WP_096287923_1" source="2514" target="2547" cy:directed="1"/>
      <edge id="28476" label="WP_017558654_2 (pp) WP_083467034_1" source="2514" target="2525" cy:directed="1"/>
      <edge id="28475" label="WP_017558654_2 (pp) WP_090858762_1" source="2514" target="2546" cy:directed="1"/>
      <edge id="28474" label="WP_017558654_2 (pp) WP_105672644_2" source="2514" target="2524" cy:directed="1"/>
      <edge id="28473" label="WP_017558654_2 (pp) WP_017594221_1" source="2514" target="2523" cy:directed="1"/>
      <edge id="28472" label="WP_017558654_2 (pp) WP_015613007_1" source="2514" target="2522" cy:directed="1"/>
      <edge id="28471" label="WP_017558654_2 (pp) WP_045196822_2" source="2514" target="2521" cy:directed="1"/>
      <edge id="28470" label="WP_017558654_2 (pp) WP_038682890_3" source="2514" target="2520" cy:directed="1"/>
      <edge id="28469" label="WP_017558654_2 (pp) WP_073770697_1" source="2514" target="2519" cy:directed="1"/>
      <edge id="28468" label="WP_017558654_2 (pp) WP_089597075_1" source="2514" target="2518" cy:directed="1"/>
      <edge id="28467" label="WP_017558654_2 (pp) WP_110470681_1" source="2514" target="2517" cy:directed="1"/>
      <edge id="28466" label="WP_017558654_2 (pp) WP_037939130_1" source="2514" target="2516" cy:directed="1"/>
      <edge id="28465" label="WP_017558654_2 (pp) WP_061787600_2" source="2514" target="2515" cy:directed="1"/>
      <edge id="28464" label="WP_017558654_2 (pp) WP_064722319_1" source="2514" target="2513" cy:directed="1"/>
      <edge id="28463" label="WP_017558654_2 (pp) WP_114400345_1" source="2514" target="2511" cy:directed="1"/>
      <edge id="28462" label="WP_017558654_2 (pp) WP_093766414_4" source="2514" target="2510" cy:directed="1"/>
      <edge id="28461" label="WP_017558654_2 (pp) WP_078760898_1" source="2514" target="2509" cy:directed="1"/>
      <edge id="28460" label="WP_017558654_2 (pp) WP_073815370_1" source="2514" target="2508" cy:directed="1"/>
      <edge id="28459" label="WP_017558654_2 (pp) WP_053556805_1" source="2514" target="2507" cy:directed="1"/>
      <edge id="28458" label="WP_017558654_2 (pp) WP_115920406_2" source="2514" target="2545" cy:directed="1"/>
      <edge id="28457" label="WP_017558654_2 (pp) WP_093355673_1" source="2514" target="2505" cy:directed="1"/>
      <edge id="28456" label="WP_017558654_2 (pp) ALE78105_1" source="2514" target="2383" cy:directed="1"/>
      <edge id="28455" label="WP_017558654_2 (pp) ALG08515_1" source="2514" target="2544" cy:directed="1"/>
      <edge id="28454" label="WP_017558654_2 (pp) OKI12399_1" source="2514" target="2504" cy:directed="1"/>
      <edge id="28453" label="WP_017558654_2 (pp) WP_071934999_2" source="2514" target="2503" cy:directed="1"/>
      <edge id="28452" label="WP_017558654_2 (pp) WP_087767686_1" source="2514" target="2502" cy:directed="1"/>
      <edge id="28451" label="WP_017558654_2 (pp) OQO95173_1" source="2514" target="2501" cy:directed="1"/>
      <edge id="28450" label="WP_017558654_2 (pp) WP_018847808_1" source="2514" target="2499" cy:directed="1"/>
      <edge id="28449" label="WP_017558654_2 (pp) WP_029987712_1" source="2514" target="2500" cy:directed="1"/>
      <edge id="28448" label="WP_017558654_2 (pp) KWX01007_1" source="2514" target="2498" cy:directed="1"/>
      <edge id="28447" label="WP_017558654_2 (pp) OLO29347_1" source="2514" target="2495" cy:directed="1"/>
      <edge id="28446" label="WP_017558654_2 (pp) WP_123813761_1" source="2514" target="2496" cy:directed="1"/>
      <edge id="28445" label="WP_017558654_2 (pp) WP_113689373_1" source="2514" target="2493" cy:directed="1"/>
      <edge id="28444" label="WP_017558654_2 (pp) RLV71217_1" source="2514" target="2491" cy:directed="1"/>
      <edge id="28443" label="WP_017558654_2 (pp) WP_095752644_1" source="2514" target="2492" cy:directed="1"/>
      <edge id="28442" label="WP_017558654_2 (pp) WP_121830363_1" source="2514" target="2543" cy:directed="1"/>
      <edge id="28441" label="WP_017558654_2 (pp) WP_097634704_1" source="2514" target="2490" cy:directed="1"/>
      <edge id="28440" label="WP_017558654_2 (pp) WP_107004474_1" source="2514" target="2542" cy:directed="1"/>
      <edge id="28439" label="WP_017558654_2 (pp) PXY18584_1" source="2514" target="2489" cy:directed="1"/>
      <edge id="28438" label="WP_017558654_2 (pp) WP_083753877_2" source="2514" target="2488" cy:directed="1"/>
      <edge id="28437" label="WP_017558654_2 (pp) WP_109162285_1" source="2514" target="2487" cy:directed="1"/>
      <edge id="28436" label="WP_017558654_2 (pp) KKI16967_3" source="2514" target="2486" cy:directed="1"/>
      <edge id="28435" label="WP_017558654_2 (pp) WP_081907113_1" source="2514" target="2541" cy:directed="1"/>
      <edge id="28434" label="WP_017558654_2 (pp) WP_084252732_3" source="2514" target="2485" cy:directed="1"/>
      <edge id="28433" label="WP_017558654_2 (pp) SJZ81173_1" source="2514" target="2484" cy:directed="1"/>
      <edge id="28432" label="WP_017558654_2 (pp) WP_103467468_1" source="2514" target="2483" cy:directed="1"/>
      <edge id="28431" label="WP_017558654_2 (pp) WP_033300563_1" source="2514" target="2482" cy:directed="1"/>
      <edge id="28430" label="WP_017558654_2 (pp) WP_058632033_1" source="2514" target="2481" cy:directed="1"/>
      <edge id="28429" label="WP_017558654_2 (pp) WP_078612341_1" source="2514" target="2480" cy:directed="1"/>
      <edge id="28428" label="WP_017558654_2 (pp) WP_059008183_2" source="2514" target="2479" cy:directed="1"/>
      <edge id="28427" label="WP_017558654_2 (pp) WP_008409979_1" source="2514" target="2478" cy:directed="1"/>
      <edge id="28426" label="WP_017558654_2 (pp) WP_073876556_1" source="2514" target="2540" cy:directed="1"/>
      <edge id="28425" label="WP_017558654_2 (pp) WP_116112318_1" source="2514" target="2477" cy:directed="1"/>
      <edge id="28424" label="WP_017558654_2 (pp) WP_031002210_2" source="2514" target="2476" cy:directed="1"/>
      <edge id="28423" label="WP_017558654_2 (pp) ALC19908_1" source="2514" target="2475" cy:directed="1"/>
      <edge id="28422" label="WP_017558654_2 (pp) WP_015100718_1" source="2514" target="2474" cy:directed="1"/>
      <edge id="28421" label="WP_017558654_2 (pp) WP_006501818_1" source="2514" target="2473" cy:directed="1"/>
      <edge id="28420" label="WP_017558654_2 (pp) WP_055689909_1" source="2514" target="2472" cy:directed="1"/>
      <edge id="28419" label="WP_017558654_2 (pp) WP_121007506_1" source="2514" target="2471" cy:directed="1"/>
      <edge id="28418" label="WP_017558654_2 (pp) WP_058915320_1" source="2514" target="2470" cy:directed="1"/>
      <edge id="28417" label="WP_017558654_2 (pp) WP_105722094_1" source="2514" target="2469" cy:directed="1"/>
      <edge id="28416" label="WP_017558654_2 (pp) WP_109186559_1" source="2514" target="2468" cy:directed="1"/>
      <edge id="28415" label="WP_017558654_2 (pp) SED75494_1" source="2514" target="2467" cy:directed="1"/>
      <edge id="28414" label="WP_017558654_2 (pp) WP_111250567_1" source="2514" target="2466" cy:directed="1"/>
      <edge id="28413" label="WP_017558654_2 (pp) WP_062924764_1" source="2514" target="2464" cy:directed="1"/>
      <edge id="28412" label="WP_017558654_2 (pp) WP_053623192_1" source="2514" target="2539" cy:directed="1"/>
      <edge id="28411" label="WP_017558654_2 (pp) WP_093655900_5" source="2514" target="2463" cy:directed="1"/>
      <edge id="28410" label="WP_017558654_2 (pp) WP_105527259_1" source="2514" target="2462" cy:directed="1"/>
      <edge id="28409" label="WP_017558654_2 (pp) WP_052852666_2" source="2514" target="2460" cy:directed="1"/>
      <edge id="28408" label="WP_017558654_2 (pp) WP_048574296_1" source="2514" target="2461" cy:directed="1"/>
      <edge id="28407" label="WP_017558654_2 (pp) WP_066976558_1" source="2514" target="2459" cy:directed="1"/>
      <edge id="28406" label="WP_017558654_2 (pp) RPK87717_1" source="2514" target="2538" cy:directed="1"/>
      <edge id="28405" label="WP_017558654_2 (pp) WP_081663146_1" source="2514" target="2457" cy:directed="1"/>
      <edge id="28404" label="WP_017558654_2 (pp) WP_116951408_3" source="2514" target="2537" cy:directed="1"/>
      <edge id="28403" label="WP_017558654_2 (pp) WP_043461231_1" source="2514" target="2455" cy:directed="1"/>
      <edge id="28402" label="WP_017558654_2 (pp) WP_077689962_1" source="2514" target="2454" cy:directed="1"/>
      <edge id="28401" label="WP_017558654_2 (pp) WP_129802804_1" source="2514" target="2536" cy:directed="1"/>
      <edge id="28400" label="WP_017558654_2 (pp) WP_056298480_2" source="2514" target="2368" cy:directed="1"/>
      <edge id="28399" label="WP_017558654_2 (pp) WP_028327189_1" source="2514" target="2453" cy:directed="1"/>
      <edge id="28398" label="WP_017558654_2 (pp) EHM27670_1" source="2514" target="2535" cy:directed="1"/>
      <edge id="28397" label="WP_017558654_2 (pp) WP_016691947_2" source="2514" target="2452" cy:directed="1"/>
      <edge id="28396" label="WP_017558654_2 (pp) WP_070343622_1" source="2514" target="2451" cy:directed="1"/>
      <edge id="28395" label="WP_017558654_2 (pp) OKI46856_1" source="2514" target="2450" cy:directed="1"/>
      <edge id="28394" label="WP_017558654_2 (pp) WP_125509413_1" source="2514" target="2449" cy:directed="1"/>
      <edge id="28393" label="WP_017558654_2 (pp) CEL19833_1" source="2514" target="2448" cy:directed="1"/>
      <edge id="28392" label="WP_017558654_2 (pp) WP_010048307_1" source="2514" target="2447" cy:directed="1"/>
      <edge id="28391" label="WP_017558654_2 (pp) WP_030701973_1" source="2514" target="2446" cy:directed="1"/>
      <edge id="28390" label="WP_017558654_2 (pp) WP_033318793_2" source="2514" target="2445" cy:directed="1"/>
      <edge id="28389" label="WP_017558654_2 (pp) WP_083472659_1" source="2514" target="2444" cy:directed="1"/>
      <edge id="28388" label="WP_017558654_2 (pp) WP_112271410_1" source="2514" target="2443" cy:directed="1"/>
      <edge id="28387" label="WP_064722319_1 (pp) ONI75210_2" source="2513" target="2552" cy:directed="1"/>
      <edge id="28386" label="WP_064722319_1 (pp) WP_086780456_1" source="2513" target="2551" cy:directed="1"/>
      <edge id="28385" label="WP_064722319_1 (pp) WP_040271779_1" source="2513" target="2553" cy:directed="1"/>
      <edge id="28384" label="WP_064722319_1 (pp) WP_067284698_3" source="2513" target="2533" cy:directed="1"/>
      <edge id="28383" label="WP_064722319_1 (pp) WP_027743449_4" source="2513" target="2532" cy:directed="1"/>
      <edge id="28382" label="WP_064722319_1 (pp) WP_055876321_1" source="2513" target="2550" cy:directed="1"/>
      <edge id="28381" label="WP_064722319_1 (pp) WP_125937921_2" source="2513" target="2549" cy:directed="1"/>
      <edge id="28380" label="WP_064722319_1 (pp) WP_110343524_1" source="2513" target="2530" cy:directed="1"/>
      <edge id="28379" label="WP_064722319_1 (pp) WP_081761968_1" source="2513" target="2548" cy:directed="1"/>
      <edge id="28378" label="WP_064722319_1 (pp) WP_130451801_3" source="2513" target="2529" cy:directed="1"/>
      <edge id="28377" label="WP_064722319_1 (pp) WP_084752844_1" source="2513" target="2528" cy:directed="1"/>
      <edge id="28376" label="WP_064722319_1 (pp) WP_006350677_1" source="2513" target="2527" cy:directed="1"/>
      <edge id="28375" label="WP_064722319_1 (pp) WP_096287923_1" source="2513" target="2547" cy:directed="1"/>
      <edge id="28374" label="WP_064722319_1 (pp) WP_083467034_1" source="2513" target="2525" cy:directed="1"/>
      <edge id="28373" label="WP_064722319_1 (pp) WP_090858762_1" source="2513" target="2546" cy:directed="1"/>
      <edge id="28372" label="WP_064722319_1 (pp) WP_017594221_1" source="2513" target="2523" cy:directed="1"/>
      <edge id="28371" label="WP_064722319_1 (pp) WP_110470681_1" source="2513" target="2517" cy:directed="1"/>
      <edge id="28370" label="WP_064722319_1 (pp) WP_037939130_1" source="2513" target="2516" cy:directed="1"/>
      <edge id="28369" label="WP_064722319_1 (pp) WP_114400345_1" source="2513" target="2511" cy:directed="1"/>
      <edge id="28368" label="WP_064722319_1 (pp) WP_078760898_1" source="2513" target="2509" cy:directed="1"/>
      <edge id="28367" label="WP_064722319_1 (pp) WP_053556805_1" source="2513" target="2507" cy:directed="1"/>
      <edge id="28366" label="WP_064722319_1 (pp) WP_115920406_2" source="2513" target="2545" cy:directed="1"/>
      <edge id="28365" label="WP_064722319_1 (pp) WP_093355673_1" source="2513" target="2505" cy:directed="1"/>
      <edge id="28364" label="WP_064722319_1 (pp) ALG08515_1" source="2513" target="2544" cy:directed="1"/>
      <edge id="28363" label="WP_064722319_1 (pp) WP_087767686_1" source="2513" target="2502" cy:directed="1"/>
      <edge id="28362" label="WP_064722319_1 (pp) OQO95173_1" source="2513" target="2501" cy:directed="1"/>
      <edge id="28361" label="WP_064722319_1 (pp) OLO29347_1" source="2513" target="2495" cy:directed="1"/>
      <edge id="28360" label="WP_064722319_1 (pp) WP_123813761_1" source="2513" target="2496" cy:directed="1"/>
      <edge id="28359" label="WP_064722319_1 (pp) WP_121830363_1" source="2513" target="2543" cy:directed="1"/>
      <edge id="28358" label="WP_064722319_1 (pp) WP_107004474_1" source="2513" target="2542" cy:directed="1"/>
      <edge id="28357" label="WP_064722319_1 (pp) WP_097634704_1" source="2513" target="2490" cy:directed="1"/>
      <edge id="28356" label="WP_064722319_1 (pp) WP_081907113_1" source="2513" target="2541" cy:directed="1"/>
      <edge id="28355" label="WP_064722319_1 (pp) WP_084252732_3" source="2513" target="2485" cy:directed="1"/>
      <edge id="28354" label="WP_064722319_1 (pp) WP_059008183_2" source="2513" target="2479" cy:directed="1"/>
      <edge id="28353" label="WP_064722319_1 (pp) WP_073876556_1" source="2513" target="2540" cy:directed="1"/>
      <edge id="28352" label="WP_064722319_1 (pp) WP_008409979_1" source="2513" target="2478" cy:directed="1"/>
      <edge id="28351" label="WP_064722319_1 (pp) WP_116112318_1" source="2513" target="2477" cy:directed="1"/>
      <edge id="28350" label="WP_064722319_1 (pp) WP_031002210_2" source="2513" target="2476" cy:directed="1"/>
      <edge id="28349" label="WP_064722319_1 (pp) WP_015100718_1" source="2513" target="2474" cy:directed="1"/>
      <edge id="28348" label="WP_064722319_1 (pp) WP_006501818_1" source="2513" target="2473" cy:directed="1"/>
      <edge id="28347" label="WP_064722319_1 (pp) WP_111250567_1" source="2513" target="2466" cy:directed="1"/>
      <edge id="28346" label="WP_064722319_1 (pp) WP_053623192_1" source="2513" target="2539" cy:directed="1"/>
      <edge id="28345" label="WP_064722319_1 (pp) WP_105527259_1" source="2513" target="2462" cy:directed="1"/>
      <edge id="28344" label="WP_064722319_1 (pp) WP_048574296_1" source="2513" target="2461" cy:directed="1"/>
      <edge id="28343" label="WP_064722319_1 (pp) WP_052852666_2" source="2513" target="2460" cy:directed="1"/>
      <edge id="28342" label="WP_064722319_1 (pp) WP_066976558_1" source="2513" target="2459" cy:directed="1"/>
      <edge id="28341" label="WP_064722319_1 (pp) RPK87717_1" source="2513" target="2538" cy:directed="1"/>
      <edge id="28340" label="WP_064722319_1 (pp) WP_081663146_1" source="2513" target="2457" cy:directed="1"/>
      <edge id="28339" label="WP_064722319_1 (pp) WP_116951408_3" source="2513" target="2537" cy:directed="1"/>
      <edge id="28338" label="WP_064722319_1 (pp) WP_077689962_1" source="2513" target="2454" cy:directed="1"/>
      <edge id="28337" label="WP_064722319_1 (pp) WP_129802804_1" source="2513" target="2536" cy:directed="1"/>
      <edge id="28336" label="WP_064722319_1 (pp) EHM27670_1" source="2513" target="2535" cy:directed="1"/>
      <edge id="28335" label="WP_064722319_1 (pp) WP_010048307_1" source="2513" target="2447" cy:directed="1"/>
      <edge id="28334" label="WP_064722319_1 (pp) WP_030701973_1" source="2513" target="2446" cy:directed="1"/>
      <edge id="28333" label="WP_064722319_1 (pp) WP_033318793_2" source="2513" target="2445" cy:directed="1"/>
      <edge id="28332" label="WP_064722319_1 (pp) WP_112271410_1" source="2513" target="2443" cy:directed="1"/>
      <edge id="28331" label="WP_055421506_1 (pp) ONI75210_2" source="2512" target="2552" cy:directed="1"/>
      <edge id="28330" label="WP_055421506_1 (pp) WP_086780456_1" source="2512" target="2551" cy:directed="1"/>
      <edge id="28329" label="WP_055421506_1 (pp) WP_040271779_1" source="2512" target="2553" cy:directed="1"/>
      <edge id="28328" label="WP_055421506_1 (pp) WP_067284698_3" source="2512" target="2533" cy:directed="1"/>
      <edge id="28327" label="WP_055421506_1 (pp) WP_055876321_1" source="2512" target="2550" cy:directed="1"/>
      <edge id="28326" label="WP_055421506_1 (pp) WP_027743449_4" source="2512" target="2532" cy:directed="1"/>
      <edge id="28325" label="WP_055421506_1 (pp) WP_125937921_2" source="2512" target="2549" cy:directed="1"/>
      <edge id="28324" label="WP_055421506_1 (pp) WP_017627596_1" source="2512" target="2531" cy:directed="1"/>
      <edge id="28323" label="WP_055421506_1 (pp) WP_110343524_1" source="2512" target="2530" cy:directed="1"/>
      <edge id="28322" label="WP_055421506_1 (pp) WP_081761968_1" source="2512" target="2548" cy:directed="1"/>
      <edge id="28321" label="WP_055421506_1 (pp) WP_130451801_3" source="2512" target="2529" cy:directed="1"/>
      <edge id="28320" label="WP_055421506_1 (pp) WP_084752844_1" source="2512" target="2528" cy:directed="1"/>
      <edge id="28319" label="WP_055421506_1 (pp) WP_006350677_1" source="2512" target="2527" cy:directed="1"/>
      <edge id="28318" label="WP_055421506_1 (pp) WP_094931980_2" source="2512" target="2526" cy:directed="1"/>
      <edge id="28317" label="WP_055421506_1 (pp) WP_096287923_1" source="2512" target="2547" cy:directed="1"/>
      <edge id="28316" label="WP_055421506_1 (pp) WP_083467034_1" source="2512" target="2525" cy:directed="1"/>
      <edge id="28315" label="WP_055421506_1 (pp) WP_090858762_1" source="2512" target="2546" cy:directed="1"/>
      <edge id="28314" label="WP_055421506_1 (pp) WP_105672644_2" source="2512" target="2524" cy:directed="1"/>
      <edge id="28313" label="WP_055421506_1 (pp) WP_017594221_1" source="2512" target="2523" cy:directed="1"/>
      <edge id="28312" label="WP_055421506_1 (pp) WP_015613007_1" source="2512" target="2522" cy:directed="1"/>
      <edge id="28311" label="WP_055421506_1 (pp) WP_038682890_3" source="2512" target="2520" cy:directed="1"/>
      <edge id="28310" label="WP_055421506_1 (pp) WP_045196822_2" source="2512" target="2521" cy:directed="1"/>
      <edge id="28309" label="WP_055421506_1 (pp) WP_073770697_1" source="2512" target="2519" cy:directed="1"/>
      <edge id="28308" label="WP_055421506_1 (pp) WP_089597075_1" source="2512" target="2518" cy:directed="1"/>
      <edge id="28307" label="WP_055421506_1 (pp) WP_110470681_1" source="2512" target="2517" cy:directed="1"/>
      <edge id="28306" label="WP_055421506_1 (pp) WP_037939130_1" source="2512" target="2516" cy:directed="1"/>
      <edge id="28305" label="WP_055421506_1 (pp) WP_017558654_2" source="2512" target="2514" cy:directed="1"/>
      <edge id="28304" label="WP_055421506_1 (pp) WP_064722319_1" source="2512" target="2513" cy:directed="1"/>
      <edge id="28303" label="WP_055421506_1 (pp) WP_093766414_4" source="2512" target="2510" cy:directed="1"/>
      <edge id="28302" label="WP_055421506_1 (pp) WP_114400345_1" source="2512" target="2511" cy:directed="1"/>
      <edge id="28301" label="WP_055421506_1 (pp) WP_078760898_1" source="2512" target="2509" cy:directed="1"/>
      <edge id="28300" label="WP_055421506_1 (pp) WP_073815370_1" source="2512" target="2508" cy:directed="1"/>
      <edge id="28299" label="WP_055421506_1 (pp) WP_053556805_1" source="2512" target="2507" cy:directed="1"/>
      <edge id="28298" label="WP_055421506_1 (pp) WP_115920406_2" source="2512" target="2545" cy:directed="1"/>
      <edge id="28297" label="WP_055421506_1 (pp) WP_093355673_1" source="2512" target="2505" cy:directed="1"/>
      <edge id="28296" label="WP_055421506_1 (pp) ALE78105_1" source="2512" target="2383" cy:directed="1"/>
      <edge id="28295" label="WP_055421506_1 (pp) ALG08515_1" source="2512" target="2544" cy:directed="1"/>
      <edge id="28294" label="WP_055421506_1 (pp) OKI12399_1" source="2512" target="2504" cy:directed="1"/>
      <edge id="28293" label="WP_055421506_1 (pp) WP_071934999_2" source="2512" target="2503" cy:directed="1"/>
      <edge id="28292" label="WP_055421506_1 (pp) WP_087767686_1" source="2512" target="2502" cy:directed="1"/>
      <edge id="28291" label="WP_055421506_1 (pp) OQO95173_1" source="2512" target="2501" cy:directed="1"/>
      <edge id="28290" label="WP_055421506_1 (pp) WP_029987712_1" source="2512" target="2500" cy:directed="1"/>
      <edge id="28289" label="WP_055421506_1 (pp) WP_018847808_1" source="2512" target="2499" cy:directed="1"/>
      <edge id="28288" label="WP_055421506_1 (pp) KWX01007_1" source="2512" target="2498" cy:directed="1"/>
      <edge id="28287" label="WP_055421506_1 (pp) WP_123813761_1" source="2512" target="2496" cy:directed="1"/>
      <edge id="28286" label="WP_055421506_1 (pp) OLO29347_1" source="2512" target="2495" cy:directed="1"/>
      <edge id="28285" label="WP_055421506_1 (pp) WP_113689373_1" source="2512" target="2493" cy:directed="1"/>
      <edge id="28284" label="WP_055421506_1 (pp) WP_095752644_1" source="2512" target="2492" cy:directed="1"/>
      <edge id="28283" label="WP_055421506_1 (pp) WP_121830363_1" source="2512" target="2543" cy:directed="1"/>
      <edge id="28282" label="WP_055421506_1 (pp) RLV71217_1" source="2512" target="2491" cy:directed="1"/>
      <edge id="28281" label="WP_055421506_1 (pp) WP_107004474_1" source="2512" target="2542" cy:directed="1"/>
      <edge id="28280" label="WP_055421506_1 (pp) WP_097634704_1" source="2512" target="2490" cy:directed="1"/>
      <edge id="28279" label="WP_055421506_1 (pp) PXY18584_1" source="2512" target="2489" cy:directed="1"/>
      <edge id="28278" label="WP_055421506_1 (pp) WP_083753877_2" source="2512" target="2488" cy:directed="1"/>
      <edge id="28277" label="WP_055421506_1 (pp) WP_109162285_1" source="2512" target="2487" cy:directed="1"/>
      <edge id="28276" label="WP_055421506_1 (pp) KKI16967_3" source="2512" target="2486" cy:directed="1"/>
      <edge id="28275" label="WP_055421506_1 (pp) WP_081907113_1" source="2512" target="2541" cy:directed="1"/>
      <edge id="28274" label="WP_055421506_1 (pp) WP_084252732_3" source="2512" target="2485" cy:directed="1"/>
      <edge id="28273" label="WP_055421506_1 (pp) SJZ81173_1" source="2512" target="2484" cy:directed="1"/>
      <edge id="28272" label="WP_055421506_1 (pp) WP_103467468_1" source="2512" target="2483" cy:directed="1"/>
      <edge id="28271" label="WP_055421506_1 (pp) WP_033300563_1" source="2512" target="2482" cy:directed="1"/>
      <edge id="28270" label="WP_055421506_1 (pp) WP_058632033_1" source="2512" target="2481" cy:directed="1"/>
      <edge id="28269" label="WP_055421506_1 (pp) WP_078612341_1" source="2512" target="2480" cy:directed="1"/>
      <edge id="28268" label="WP_055421506_1 (pp) WP_059008183_2" source="2512" target="2479" cy:directed="1"/>
      <edge id="28267" label="WP_055421506_1 (pp) WP_008409979_1" source="2512" target="2478" cy:directed="1"/>
      <edge id="28266" label="WP_055421506_1 (pp) WP_073876556_1" source="2512" target="2540" cy:directed="1"/>
      <edge id="28265" label="WP_055421506_1 (pp) WP_116112318_1" source="2512" target="2477" cy:directed="1"/>
      <edge id="28264" label="WP_055421506_1 (pp) WP_031002210_2" source="2512" target="2476" cy:directed="1"/>
      <edge id="28263" label="WP_055421506_1 (pp) ALC19908_1" source="2512" target="2475" cy:directed="1"/>
      <edge id="28262" label="WP_055421506_1 (pp) WP_015100718_1" source="2512" target="2474" cy:directed="1"/>
      <edge id="28261" label="WP_055421506_1 (pp) WP_006501818_1" source="2512" target="2473" cy:directed="1"/>
      <edge id="28260" label="WP_055421506_1 (pp) WP_055689909_1" source="2512" target="2472" cy:directed="1"/>
      <edge id="28259" label="WP_055421506_1 (pp) WP_121007506_1" source="2512" target="2471" cy:directed="1"/>
      <edge id="28258" label="WP_055421506_1 (pp) WP_058915320_1" source="2512" target="2470" cy:directed="1"/>
      <edge id="28257" label="WP_055421506_1 (pp) WP_105722094_1" source="2512" target="2469" cy:directed="1"/>
      <edge id="28256" label="WP_055421506_1 (pp) WP_109186559_1" source="2512" target="2468" cy:directed="1"/>
      <edge id="28255" label="WP_055421506_1 (pp) SED75494_1" source="2512" target="2467" cy:directed="1"/>
      <edge id="28254" label="WP_055421506_1 (pp) WP_111250567_1" source="2512" target="2466" cy:directed="1"/>
      <edge id="28253" label="WP_055421506_1 (pp) WP_053623192_1" source="2512" target="2539" cy:directed="1"/>
      <edge id="28252" label="WP_055421506_1 (pp) WP_062924764_1" source="2512" target="2464" cy:directed="1"/>
      <edge id="28251" label="WP_055421506_1 (pp) WP_093655900_5" source="2512" target="2463" cy:directed="1"/>
      <edge id="28250" label="WP_055421506_1 (pp) WP_105527259_1" source="2512" target="2462" cy:directed="1"/>
      <edge id="28249" label="WP_055421506_1 (pp) WP_048574296_1" source="2512" target="2461" cy:directed="1"/>
      <edge id="28248" label="WP_055421506_1 (pp) WP_052852666_2" source="2512" target="2460" cy:directed="1"/>
      <edge id="28247" label="WP_055421506_1 (pp) WP_066976558_1" source="2512" target="2459" cy:directed="1"/>
      <edge id="28246" label="WP_055421506_1 (pp) RPK87717_1" source="2512" target="2538" cy:directed="1"/>
      <edge id="28245" label="WP_055421506_1 (pp) WP_081663146_1" source="2512" target="2457" cy:directed="1"/>
      <edge id="28244" label="WP_055421506_1 (pp) WP_116951408_3" source="2512" target="2537" cy:directed="1"/>
      <edge id="28243" label="WP_055421506_1 (pp) WP_077689962_1" source="2512" target="2454" cy:directed="1"/>
      <edge id="28242" label="WP_055421506_1 (pp) WP_043461231_1" source="2512" target="2455" cy:directed="1"/>
      <edge id="28241" label="WP_055421506_1 (pp) WP_129802804_1" source="2512" target="2536" cy:directed="1"/>
      <edge id="28240" label="WP_055421506_1 (pp) WP_028327189_1" source="2512" target="2453" cy:directed="1"/>
      <edge id="28239" label="WP_055421506_1 (pp) EHM27670_1" source="2512" target="2535" cy:directed="1"/>
      <edge id="28238" label="WP_055421506_1 (pp) WP_016691947_2" source="2512" target="2452" cy:directed="1"/>
      <edge id="28237" label="WP_055421506_1 (pp) WP_070343622_1" source="2512" target="2451" cy:directed="1"/>
      <edge id="28236" label="WP_055421506_1 (pp) OKI46856_1" source="2512" target="2450" cy:directed="1"/>
      <edge id="28235" label="WP_055421506_1 (pp) WP_125509413_1" source="2512" target="2449" cy:directed="1"/>
      <edge id="28234" label="WP_055421506_1 (pp) CEL19833_1" source="2512" target="2448" cy:directed="1"/>
      <edge id="28233" label="WP_055421506_1 (pp) WP_010048307_1" source="2512" target="2447" cy:directed="1"/>
      <edge id="28232" label="WP_055421506_1 (pp) WP_030701973_1" source="2512" target="2446" cy:directed="1"/>
      <edge id="28231" label="WP_055421506_1 (pp) WP_033318793_2" source="2512" target="2445" cy:directed="1"/>
      <edge id="28230" label="WP_055421506_1 (pp) WP_083472659_1" source="2512" target="2444" cy:directed="1"/>
      <edge id="28229" label="WP_055421506_1 (pp) WP_112271410_1" source="2512" target="2443" cy:directed="1"/>
      <edge id="28228" label="WP_114400345_1 (pp) ONI75210_2" source="2511" target="2552" cy:directed="1"/>
      <edge id="28227" label="WP_114400345_1 (pp) WP_086780456_1" source="2511" target="2551" cy:directed="1"/>
      <edge id="28226" label="WP_114400345_1 (pp) WP_040271779_1" source="2511" target="2553" cy:directed="1"/>
      <edge id="28225" label="WP_114400345_1 (pp) WP_067284698_3" source="2511" target="2533" cy:directed="1"/>
      <edge id="28224" label="WP_114400345_1 (pp) WP_055876321_1" source="2511" target="2550" cy:directed="1"/>
      <edge id="28223" label="WP_114400345_1 (pp) WP_125937921_2" source="2511" target="2549" cy:directed="1"/>
      <edge id="28222" label="WP_114400345_1 (pp) WP_081761968_1" source="2511" target="2548" cy:directed="1"/>
      <edge id="28221" label="WP_114400345_1 (pp) WP_130451801_3" source="2511" target="2529" cy:directed="1"/>
      <edge id="28220" label="WP_114400345_1 (pp) WP_096287923_1" source="2511" target="2547" cy:directed="1"/>
      <edge id="28219" label="WP_114400345_1 (pp) WP_090858762_1" source="2511" target="2546" cy:directed="1"/>
      <edge id="28218" label="WP_114400345_1 (pp) WP_017594221_1" source="2511" target="2523" cy:directed="1"/>
      <edge id="28217" label="WP_114400345_1 (pp) WP_037939130_1" source="2511" target="2516" cy:directed="1"/>
      <edge id="28216" label="WP_114400345_1 (pp) WP_115920406_2" source="2511" target="2545" cy:directed="1"/>
      <edge id="28215" label="WP_114400345_1 (pp) ALG08515_1" source="2511" target="2544" cy:directed="1"/>
      <edge id="28214" label="WP_114400345_1 (pp) WP_121830363_1" source="2511" target="2543" cy:directed="1"/>
      <edge id="28213" label="WP_114400345_1 (pp) WP_107004474_1" source="2511" target="2542" cy:directed="1"/>
      <edge id="28212" label="WP_114400345_1 (pp) WP_081907113_1" source="2511" target="2541" cy:directed="1"/>
      <edge id="28211" label="WP_114400345_1 (pp) WP_073876556_1" source="2511" target="2540" cy:directed="1"/>
      <edge id="28210" label="WP_114400345_1 (pp) WP_053623192_1" source="2511" target="2539" cy:directed="1"/>
      <edge id="28209" label="WP_114400345_1 (pp) RPK87717_1" source="2511" target="2538" cy:directed="1"/>
      <edge id="28208" label="WP_114400345_1 (pp) WP_116951408_3" source="2511" target="2537" cy:directed="1"/>
      <edge id="28207" label="WP_114400345_1 (pp) WP_129802804_1" source="2511" target="2536" cy:directed="1"/>
      <edge id="28206" label="WP_114400345_1 (pp) EHM27670_1" source="2511" target="2535" cy:directed="1"/>
      <edge id="28205" label="WP_093766414_4 (pp) ONI75210_2" source="2510" target="2552" cy:directed="1"/>
      <edge id="28204" label="WP_093766414_4 (pp) WP_086780456_1" source="2510" target="2551" cy:directed="1"/>
      <edge id="28203" label="WP_093766414_4 (pp) WP_040271779_1" source="2510" target="2553" cy:directed="1"/>
      <edge id="28202" label="WP_093766414_4 (pp) WP_067284698_3" source="2510" target="2533" cy:directed="1"/>
      <edge id="28201" label="WP_093766414_4 (pp) WP_055876321_1" source="2510" target="2550" cy:directed="1"/>
      <edge id="28200" label="WP_093766414_4 (pp) WP_027743449_4" source="2510" target="2532" cy:directed="1"/>
      <edge id="28199" label="WP_093766414_4 (pp) WP_125937921_2" source="2510" target="2549" cy:directed="1"/>
      <edge id="28198" label="WP_093766414_4 (pp) WP_110343524_1" source="2510" target="2530" cy:directed="1"/>
      <edge id="28197" label="WP_093766414_4 (pp) WP_081761968_1" source="2510" target="2548" cy:directed="1"/>
      <edge id="28196" label="WP_093766414_4 (pp) WP_130451801_3" source="2510" target="2529" cy:directed="1"/>
      <edge id="28195" label="WP_093766414_4 (pp) WP_084752844_1" source="2510" target="2528" cy:directed="1"/>
      <edge id="28194" label="WP_093766414_4 (pp) WP_006350677_1" source="2510" target="2527" cy:directed="1"/>
      <edge id="28193" label="WP_093766414_4 (pp) WP_096287923_1" source="2510" target="2547" cy:directed="1"/>
      <edge id="28192" label="WP_093766414_4 (pp) WP_083467034_1" source="2510" target="2525" cy:directed="1"/>
      <edge id="28191" label="WP_093766414_4 (pp) WP_090858762_1" source="2510" target="2546" cy:directed="1"/>
      <edge id="28190" label="WP_093766414_4 (pp) WP_017594221_1" source="2510" target="2523" cy:directed="1"/>
      <edge id="28189" label="WP_093766414_4 (pp) WP_110470681_1" source="2510" target="2517" cy:directed="1"/>
      <edge id="28188" label="WP_093766414_4 (pp) WP_037939130_1" source="2510" target="2516" cy:directed="1"/>
      <edge id="28187" label="WP_093766414_4 (pp) WP_064722319_1" source="2510" target="2513" cy:directed="1"/>
      <edge id="28186" label="WP_093766414_4 (pp) WP_114400345_1" source="2510" target="2511" cy:directed="1"/>
      <edge id="28185" label="WP_093766414_4 (pp) WP_078760898_1" source="2510" target="2509" cy:directed="1"/>
      <edge id="28184" label="WP_093766414_4 (pp) WP_053556805_1" source="2510" target="2507" cy:directed="1"/>
      <edge id="28183" label="WP_093766414_4 (pp) WP_115920406_2" source="2510" target="2545" cy:directed="1"/>
      <edge id="28182" label="WP_093766414_4 (pp) WP_093355673_1" source="2510" target="2505" cy:directed="1"/>
      <edge id="28181" label="WP_093766414_4 (pp) ALG08515_1" source="2510" target="2544" cy:directed="1"/>
      <edge id="28180" label="WP_093766414_4 (pp) WP_087767686_1" source="2510" target="2502" cy:directed="1"/>
      <edge id="28179" label="WP_093766414_4 (pp) OQO95173_1" source="2510" target="2501" cy:directed="1"/>
      <edge id="28178" label="WP_093766414_4 (pp) OLO29347_1" source="2510" target="2495" cy:directed="1"/>
      <edge id="28177" label="WP_093766414_4 (pp) WP_123813761_1" source="2510" target="2496" cy:directed="1"/>
      <edge id="28176" label="WP_093766414_4 (pp) WP_121830363_1" source="2510" target="2543" cy:directed="1"/>
      <edge id="28175" label="WP_093766414_4 (pp) WP_107004474_1" source="2510" target="2542" cy:directed="1"/>
      <edge id="28174" label="WP_093766414_4 (pp) WP_097634704_1" source="2510" target="2490" cy:directed="1"/>
      <edge id="28173" label="WP_093766414_4 (pp) WP_081907113_1" source="2510" target="2541" cy:directed="1"/>
      <edge id="28172" label="WP_093766414_4 (pp) WP_084252732_3" source="2510" target="2485" cy:directed="1"/>
      <edge id="28171" label="WP_093766414_4 (pp) WP_059008183_2" source="2510" target="2479" cy:directed="1"/>
      <edge id="28170" label="WP_093766414_4 (pp) WP_008409979_1" source="2510" target="2478" cy:directed="1"/>
      <edge id="28169" label="WP_093766414_4 (pp) WP_073876556_1" source="2510" target="2540" cy:directed="1"/>
      <edge id="28168" label="WP_093766414_4 (pp) WP_116112318_1" source="2510" target="2477" cy:directed="1"/>
      <edge id="28167" label="WP_093766414_4 (pp) WP_031002210_2" source="2510" target="2476" cy:directed="1"/>
      <edge id="28166" label="WP_093766414_4 (pp) WP_015100718_1" source="2510" target="2474" cy:directed="1"/>
      <edge id="28165" label="WP_093766414_4 (pp) WP_006501818_1" source="2510" target="2473" cy:directed="1"/>
      <edge id="28164" label="WP_093766414_4 (pp) WP_111250567_1" source="2510" target="2466" cy:directed="1"/>
      <edge id="28163" label="WP_093766414_4 (pp) WP_053623192_1" source="2510" target="2539" cy:directed="1"/>
      <edge id="28162" label="WP_093766414_4 (pp) WP_105527259_1" source="2510" target="2462" cy:directed="1"/>
      <edge id="28161" label="WP_093766414_4 (pp) WP_048574296_1" source="2510" target="2461" cy:directed="1"/>
      <edge id="28160" label="WP_093766414_4 (pp) WP_052852666_2" source="2510" target="2460" cy:directed="1"/>
      <edge id="28159" label="WP_093766414_4 (pp) WP_066976558_1" source="2510" target="2459" cy:directed="1"/>
      <edge id="28158" label="WP_093766414_4 (pp) RPK87717_1" source="2510" target="2538" cy:directed="1"/>
      <edge id="28157" label="WP_093766414_4 (pp) WP_081663146_1" source="2510" target="2457" cy:directed="1"/>
      <edge id="28156" label="WP_093766414_4 (pp) WP_116951408_3" source="2510" target="2537" cy:directed="1"/>
      <edge id="28155" label="WP_093766414_4 (pp) WP_077689962_1" source="2510" target="2454" cy:directed="1"/>
      <edge id="28154" label="WP_093766414_4 (pp) WP_129802804_1" source="2510" target="2536" cy:directed="1"/>
      <edge id="28153" label="WP_093766414_4 (pp) EHM27670_1" source="2510" target="2535" cy:directed="1"/>
      <edge id="28152" label="WP_093766414_4 (pp) WP_010048307_1" source="2510" target="2447" cy:directed="1"/>
      <edge id="28151" label="WP_093766414_4 (pp) WP_030701973_1" source="2510" target="2446" cy:directed="1"/>
      <edge id="28150" label="WP_093766414_4 (pp) WP_033318793_2" source="2510" target="2445" cy:directed="1"/>
      <edge id="28149" label="WP_093766414_4 (pp) WP_112271410_1" source="2510" target="2443" cy:directed="1"/>
      <edge id="28148" label="WP_078760898_1 (pp) ONI75210_2" source="2509" target="2552" cy:directed="1"/>
      <edge id="28147" label="WP_078760898_1 (pp) WP_086780456_1" source="2509" target="2551" cy:directed="1"/>
      <edge id="28146" label="WP_078760898_1 (pp) WP_040271779_1" source="2509" target="2553" cy:directed="1"/>
      <edge id="28145" label="WP_078760898_1 (pp) WP_067284698_3" source="2509" target="2533" cy:directed="1"/>
      <edge id="28144" label="WP_078760898_1 (pp) WP_055876321_1" source="2509" target="2550" cy:directed="1"/>
      <edge id="28143" label="WP_078760898_1 (pp) WP_125937921_2" source="2509" target="2549" cy:directed="1"/>
      <edge id="28142" label="WP_078760898_1 (pp) WP_081761968_1" source="2509" target="2548" cy:directed="1"/>
      <edge id="28141" label="WP_078760898_1 (pp) WP_130451801_3" source="2509" target="2529" cy:directed="1"/>
      <edge id="28140" label="WP_078760898_1 (pp) WP_096287923_1" source="2509" target="2547" cy:directed="1"/>
      <edge id="28139" label="WP_078760898_1 (pp) WP_090858762_1" source="2509" target="2546" cy:directed="1"/>
      <edge id="28138" label="WP_078760898_1 (pp) WP_017594221_1" source="2509" target="2523" cy:directed="1"/>
      <edge id="28137" label="WP_078760898_1 (pp) WP_037939130_1" source="2509" target="2516" cy:directed="1"/>
      <edge id="28136" label="WP_078760898_1 (pp) WP_114400345_1" source="2509" target="2511" cy:directed="1"/>
      <edge id="28135" label="WP_078760898_1 (pp) WP_115920406_2" source="2509" target="2545" cy:directed="1"/>
      <edge id="28134" label="WP_078760898_1 (pp) ALG08515_1" source="2509" target="2544" cy:directed="1"/>
      <edge id="28133" label="WP_078760898_1 (pp) WP_121830363_1" source="2509" target="2543" cy:directed="1"/>
      <edge id="28132" label="WP_078760898_1 (pp) WP_107004474_1" source="2509" target="2542" cy:directed="1"/>
      <edge id="28131" label="WP_078760898_1 (pp) WP_081907113_1" source="2509" target="2541" cy:directed="1"/>
      <edge id="28130" label="WP_078760898_1 (pp) WP_073876556_1" source="2509" target="2540" cy:directed="1"/>
      <edge id="28129" label="WP_078760898_1 (pp) WP_053623192_1" source="2509" target="2539" cy:directed="1"/>
      <edge id="28128" label="WP_078760898_1 (pp) RPK87717_1" source="2509" target="2538" cy:directed="1"/>
      <edge id="28127" label="WP_078760898_1 (pp) WP_116951408_3" source="2509" target="2537" cy:directed="1"/>
      <edge id="28126" label="WP_078760898_1 (pp) WP_129802804_1" source="2509" target="2536" cy:directed="1"/>
      <edge id="28125" label="WP_078760898_1 (pp) EHM27670_1" source="2509" target="2535" cy:directed="1"/>
      <edge id="28124" label="WP_073815370_1 (pp) ONI75210_2" source="2508" target="2552" cy:directed="1"/>
      <edge id="28123" label="WP_073815370_1 (pp) WP_086780456_1" source="2508" target="2551" cy:directed="1"/>
      <edge id="28122" label="WP_073815370_1 (pp) WP_040271779_1" source="2508" target="2553" cy:directed="1"/>
      <edge id="28121" label="WP_073815370_1 (pp) WP_067284698_3" source="2508" target="2533" cy:directed="1"/>
      <edge id="28120" label="WP_073815370_1 (pp) WP_055876321_1" source="2508" target="2550" cy:directed="1"/>
      <edge id="28119" label="WP_073815370_1 (pp) WP_027743449_4" source="2508" target="2532" cy:directed="1"/>
      <edge id="28118" label="WP_073815370_1 (pp) WP_125937921_2" source="2508" target="2549" cy:directed="1"/>
      <edge id="28117" label="WP_073815370_1 (pp) WP_110343524_1" source="2508" target="2530" cy:directed="1"/>
      <edge id="28116" label="WP_073815370_1 (pp) WP_081761968_1" source="2508" target="2548" cy:directed="1"/>
      <edge id="28115" label="WP_073815370_1 (pp) WP_130451801_3" source="2508" target="2529" cy:directed="1"/>
      <edge id="28114" label="WP_073815370_1 (pp) WP_084752844_1" source="2508" target="2528" cy:directed="1"/>
      <edge id="28113" label="WP_073815370_1 (pp) WP_006350677_1" source="2508" target="2527" cy:directed="1"/>
      <edge id="28112" label="WP_073815370_1 (pp) WP_096287923_1" source="2508" target="2547" cy:directed="1"/>
      <edge id="28111" label="WP_073815370_1 (pp) WP_083467034_1" source="2508" target="2525" cy:directed="1"/>
      <edge id="28110" label="WP_073815370_1 (pp) WP_090858762_1" source="2508" target="2546" cy:directed="1"/>
      <edge id="28109" label="WP_073815370_1 (pp) WP_105672644_2" source="2508" target="2524" cy:directed="1"/>
      <edge id="28108" label="WP_073815370_1 (pp) WP_017594221_1" source="2508" target="2523" cy:directed="1"/>
      <edge id="28107" label="WP_073815370_1 (pp) WP_015613007_1" source="2508" target="2522" cy:directed="1"/>
      <edge id="28106" label="WP_073815370_1 (pp) WP_038682890_3" source="2508" target="2520" cy:directed="1"/>
      <edge id="28105" label="WP_073815370_1 (pp) WP_045196822_2" source="2508" target="2521" cy:directed="1"/>
      <edge id="28104" label="WP_073815370_1 (pp) WP_110470681_1" source="2508" target="2517" cy:directed="1"/>
      <edge id="28103" label="WP_073815370_1 (pp) WP_037939130_1" source="2508" target="2516" cy:directed="1"/>
      <edge id="28102" label="WP_073815370_1 (pp) WP_064722319_1" source="2508" target="2513" cy:directed="1"/>
      <edge id="28101" label="WP_073815370_1 (pp) WP_093766414_4" source="2508" target="2510" cy:directed="1"/>
      <edge id="28100" label="WP_073815370_1 (pp) WP_114400345_1" source="2508" target="2511" cy:directed="1"/>
      <edge id="28099" label="WP_073815370_1 (pp) WP_078760898_1" source="2508" target="2509" cy:directed="1"/>
      <edge id="28098" label="WP_073815370_1 (pp) WP_053556805_1" source="2508" target="2507" cy:directed="1"/>
      <edge id="28097" label="WP_073815370_1 (pp) WP_115920406_2" source="2508" target="2545" cy:directed="1"/>
      <edge id="28096" label="WP_073815370_1 (pp) WP_093355673_1" source="2508" target="2505" cy:directed="1"/>
      <edge id="28095" label="WP_073815370_1 (pp) ALE78105_1" source="2508" target="2383" cy:directed="1"/>
      <edge id="28094" label="WP_073815370_1 (pp) ALG08515_1" source="2508" target="2544" cy:directed="1"/>
      <edge id="28093" label="WP_073815370_1 (pp) WP_071934999_2" source="2508" target="2503" cy:directed="1"/>
      <edge id="28092" label="WP_073815370_1 (pp) WP_087767686_1" source="2508" target="2502" cy:directed="1"/>
      <edge id="28091" label="WP_073815370_1 (pp) OQO95173_1" source="2508" target="2501" cy:directed="1"/>
      <edge id="28090" label="WP_073815370_1 (pp) WP_018847808_1" source="2508" target="2499" cy:directed="1"/>
      <edge id="28089" label="WP_073815370_1 (pp) OLO29347_1" source="2508" target="2495" cy:directed="1"/>
      <edge id="28088" label="WP_073815370_1 (pp) WP_123813761_1" source="2508" target="2496" cy:directed="1"/>
      <edge id="28087" label="WP_073815370_1 (pp) WP_113689373_1" source="2508" target="2493" cy:directed="1"/>
      <edge id="28086" label="WP_073815370_1 (pp) RLV71217_1" source="2508" target="2491" cy:directed="1"/>
      <edge id="28085" label="WP_073815370_1 (pp) WP_121830363_1" source="2508" target="2543" cy:directed="1"/>
      <edge id="28084" label="WP_073815370_1 (pp) WP_107004474_1" source="2508" target="2542" cy:directed="1"/>
      <edge id="28083" label="WP_073815370_1 (pp) WP_097634704_1" source="2508" target="2490" cy:directed="1"/>
      <edge id="28082" label="WP_073815370_1 (pp) WP_083753877_2" source="2508" target="2488" cy:directed="1"/>
      <edge id="28081" label="WP_073815370_1 (pp) WP_081907113_1" source="2508" target="2541" cy:directed="1"/>
      <edge id="28080" label="WP_073815370_1 (pp) WP_084252732_3" source="2508" target="2485" cy:directed="1"/>
      <edge id="28079" label="WP_073815370_1 (pp) SJZ81173_1" source="2508" target="2484" cy:directed="1"/>
      <edge id="28078" label="WP_073815370_1 (pp) WP_103467468_1" source="2508" target="2483" cy:directed="1"/>
      <edge id="28077" label="WP_073815370_1 (pp) WP_033300563_1" source="2508" target="2482" cy:directed="1"/>
      <edge id="28076" label="WP_073815370_1 (pp) WP_078612341_1" source="2508" target="2480" cy:directed="1"/>
      <edge id="28075" label="WP_073815370_1 (pp) WP_059008183_2" source="2508" target="2479" cy:directed="1"/>
      <edge id="28074" label="WP_073815370_1 (pp) WP_008409979_1" source="2508" target="2478" cy:directed="1"/>
      <edge id="28073" label="WP_073815370_1 (pp) WP_073876556_1" source="2508" target="2540" cy:directed="1"/>
      <edge id="28072" label="WP_073815370_1 (pp) WP_116112318_1" source="2508" target="2477" cy:directed="1"/>
      <edge id="28071" label="WP_073815370_1 (pp) WP_031002210_2" source="2508" target="2476" cy:directed="1"/>
      <edge id="28070" label="WP_073815370_1 (pp) ALC19908_1" source="2508" target="2475" cy:directed="1"/>
      <edge id="28069" label="WP_073815370_1 (pp) WP_015100718_1" source="2508" target="2474" cy:directed="1"/>
      <edge id="28068" label="WP_073815370_1 (pp) WP_006501818_1" source="2508" target="2473" cy:directed="1"/>
      <edge id="28067" label="WP_073815370_1 (pp) WP_055689909_1" source="2508" target="2472" cy:directed="1"/>
      <edge id="28066" label="WP_073815370_1 (pp) WP_109186559_1" source="2508" target="2468" cy:directed="1"/>
      <edge id="28065" label="WP_073815370_1 (pp) SED75494_1" source="2508" target="2467" cy:directed="1"/>
      <edge id="28064" label="WP_073815370_1 (pp) WP_111250567_1" source="2508" target="2466" cy:directed="1"/>
      <edge id="28063" label="WP_073815370_1 (pp) WP_053623192_1" source="2508" target="2539" cy:directed="1"/>
      <edge id="28062" label="WP_073815370_1 (pp) WP_062924764_1" source="2508" target="2464" cy:directed="1"/>
      <edge id="28061" label="WP_073815370_1 (pp) WP_105527259_1" source="2508" target="2462" cy:directed="1"/>
      <edge id="28060" label="WP_073815370_1 (pp) WP_048574296_1" source="2508" target="2461" cy:directed="1"/>
      <edge id="28059" label="WP_073815370_1 (pp) WP_052852666_2" source="2508" target="2460" cy:directed="1"/>
      <edge id="28058" label="WP_073815370_1 (pp) WP_066976558_1" source="2508" target="2459" cy:directed="1"/>
      <edge id="28057" label="WP_073815370_1 (pp) RPK87717_1" source="2508" target="2538" cy:directed="1"/>
      <edge id="28056" label="WP_073815370_1 (pp) WP_081663146_1" source="2508" target="2457" cy:directed="1"/>
      <edge id="28055" label="WP_073815370_1 (pp) WP_116951408_3" source="2508" target="2537" cy:directed="1"/>
      <edge id="28054" label="WP_073815370_1 (pp) WP_077689962_1" source="2508" target="2454" cy:directed="1"/>
      <edge id="28053" label="WP_073815370_1 (pp) WP_129802804_1" source="2508" target="2536" cy:directed="1"/>
      <edge id="28052" label="WP_073815370_1 (pp) WP_028327189_1" source="2508" target="2453" cy:directed="1"/>
      <edge id="28051" label="WP_073815370_1 (pp) EHM27670_1" source="2508" target="2535" cy:directed="1"/>
      <edge id="28050" label="WP_073815370_1 (pp) WP_070343622_1" source="2508" target="2451" cy:directed="1"/>
      <edge id="28049" label="WP_073815370_1 (pp) OKI46856_1" source="2508" target="2450" cy:directed="1"/>
      <edge id="28048" label="WP_073815370_1 (pp) WP_010048307_1" source="2508" target="2447" cy:directed="1"/>
      <edge id="28047" label="WP_073815370_1 (pp) WP_030701973_1" source="2508" target="2446" cy:directed="1"/>
      <edge id="28046" label="WP_073815370_1 (pp) WP_033318793_2" source="2508" target="2445" cy:directed="1"/>
      <edge id="28045" label="WP_073815370_1 (pp) WP_112271410_1" source="2508" target="2443" cy:directed="1"/>
      <edge id="28044" label="WP_053556805_1 (pp) ONI75210_2" source="2507" target="2552" cy:directed="1"/>
      <edge id="28043" label="WP_053556805_1 (pp) WP_086780456_1" source="2507" target="2551" cy:directed="1"/>
      <edge id="28042" label="WP_053556805_1 (pp) WP_040271779_1" source="2507" target="2553" cy:directed="1"/>
      <edge id="28041" label="WP_053556805_1 (pp) WP_067284698_3" source="2507" target="2533" cy:directed="1"/>
      <edge id="28040" label="WP_053556805_1 (pp) WP_055876321_1" source="2507" target="2550" cy:directed="1"/>
      <edge id="28039" label="WP_053556805_1 (pp) WP_125937921_2" source="2507" target="2549" cy:directed="1"/>
      <edge id="28038" label="WP_053556805_1 (pp) WP_081761968_1" source="2507" target="2548" cy:directed="1"/>
      <edge id="28037" label="WP_053556805_1 (pp) WP_130451801_3" source="2507" target="2529" cy:directed="1"/>
      <edge id="28036" label="WP_053556805_1 (pp) WP_096287923_1" source="2507" target="2547" cy:directed="1"/>
      <edge id="28035" label="WP_053556805_1 (pp) WP_090858762_1" source="2507" target="2546" cy:directed="1"/>
      <edge id="28034" label="WP_053556805_1 (pp) WP_017594221_1" source="2507" target="2523" cy:directed="1"/>
      <edge id="28033" label="WP_053556805_1 (pp) WP_037939130_1" source="2507" target="2516" cy:directed="1"/>
      <edge id="28032" label="WP_053556805_1 (pp) WP_061787600_2" source="2507" target="2515" cy:directed="1"/>
      <edge id="28031" label="WP_053556805_1 (pp) WP_114400345_1" source="2507" target="2511" cy:directed="1"/>
      <edge id="28030" label="WP_053556805_1 (pp) WP_078760898_1" source="2507" target="2509" cy:directed="1"/>
      <edge id="28029" label="WP_053556805_1 (pp) WP_115920406_2" source="2507" target="2545" cy:directed="1"/>
      <edge id="28028" label="WP_053556805_1 (pp) ALG08515_1" source="2507" target="2544" cy:directed="1"/>
      <edge id="28027" label="WP_053556805_1 (pp) WP_121830363_1" source="2507" target="2543" cy:directed="1"/>
      <edge id="28026" label="WP_053556805_1 (pp) WP_107004474_1" source="2507" target="2542" cy:directed="1"/>
      <edge id="28025" label="WP_053556805_1 (pp) WP_081907113_1" source="2507" target="2541" cy:directed="1"/>
      <edge id="28024" label="WP_053556805_1 (pp) WP_073876556_1" source="2507" target="2540" cy:directed="1"/>
      <edge id="28023" label="WP_053556805_1 (pp) WP_053623192_1" source="2507" target="2539" cy:directed="1"/>
      <edge id="28022" label="WP_053556805_1 (pp) RPK87717_1" source="2507" target="2538" cy:directed="1"/>
      <edge id="28021" label="WP_053556805_1 (pp) WP_116951408_3" source="2507" target="2537" cy:directed="1"/>
      <edge id="28020" label="WP_053556805_1 (pp) WP_129802804_1" source="2507" target="2536" cy:directed="1"/>
      <edge id="28019" label="WP_053556805_1 (pp) EHM27670_1" source="2507" target="2535" cy:directed="1"/>
      <edge id="28018" label="WP_103530696_1 (pp) ONI75210_2" source="2506" target="2552" cy:directed="1"/>
      <edge id="28017" label="WP_103530696_1 (pp) WP_086780456_1" source="2506" target="2551" cy:directed="1"/>
      <edge id="28016" label="WP_103530696_1 (pp) WP_040271779_1" source="2506" target="2553" cy:directed="1"/>
      <edge id="28015" label="WP_103530696_1 (pp) WP_067284698_3" source="2506" target="2533" cy:directed="1"/>
      <edge id="28014" label="WP_103530696_1 (pp) WP_055876321_1" source="2506" target="2550" cy:directed="1"/>
      <edge id="28013" label="WP_103530696_1 (pp) WP_027743449_4" source="2506" target="2532" cy:directed="1"/>
      <edge id="28012" label="WP_103530696_1 (pp) WP_125937921_2" source="2506" target="2549" cy:directed="1"/>
      <edge id="28011" label="WP_103530696_1 (pp) WP_017627596_1" source="2506" target="2531" cy:directed="1"/>
      <edge id="28010" label="WP_103530696_1 (pp) WP_110343524_1" source="2506" target="2530" cy:directed="1"/>
      <edge id="28009" label="WP_103530696_1 (pp) WP_081761968_1" source="2506" target="2548" cy:directed="1"/>
      <edge id="28008" label="WP_103530696_1 (pp) WP_130451801_3" source="2506" target="2529" cy:directed="1"/>
      <edge id="28007" label="WP_103530696_1 (pp) WP_084752844_1" source="2506" target="2528" cy:directed="1"/>
      <edge id="28006" label="WP_103530696_1 (pp) WP_006350677_1" source="2506" target="2527" cy:directed="1"/>
      <edge id="28005" label="WP_103530696_1 (pp) WP_094931980_2" source="2506" target="2526" cy:directed="1"/>
      <edge id="28004" label="WP_103530696_1 (pp) WP_096287923_1" source="2506" target="2547" cy:directed="1"/>
      <edge id="28003" label="WP_103530696_1 (pp) WP_083467034_1" source="2506" target="2525" cy:directed="1"/>
      <edge id="28002" label="WP_103530696_1 (pp) WP_090858762_1" source="2506" target="2546" cy:directed="1"/>
      <edge id="28001" label="WP_103530696_1 (pp) WP_105672644_2" source="2506" target="2524" cy:directed="1"/>
      <edge id="28000" label="WP_103530696_1 (pp) WP_017594221_1" source="2506" target="2523" cy:directed="1"/>
      <edge id="27999" label="WP_103530696_1 (pp) WP_015613007_1" source="2506" target="2522" cy:directed="1"/>
      <edge id="27998" label="WP_103530696_1 (pp) WP_045196822_2" source="2506" target="2521" cy:directed="1"/>
      <edge id="27997" label="WP_103530696_1 (pp) WP_038682890_3" source="2506" target="2520" cy:directed="1"/>
      <edge id="27996" label="WP_103530696_1 (pp) WP_073770697_1" source="2506" target="2519" cy:directed="1"/>
      <edge id="27995" label="WP_103530696_1 (pp) WP_089597075_1" source="2506" target="2518" cy:directed="1"/>
      <edge id="27994" label="WP_103530696_1 (pp) WP_110470681_1" source="2506" target="2517" cy:directed="1"/>
      <edge id="27993" label="WP_103530696_1 (pp) WP_037939130_1" source="2506" target="2516" cy:directed="1"/>
      <edge id="27992" label="WP_103530696_1 (pp) WP_017558654_2" source="2506" target="2514" cy:directed="1"/>
      <edge id="27991" label="WP_103530696_1 (pp) WP_064722319_1" source="2506" target="2513" cy:directed="1"/>
      <edge id="27990" label="WP_103530696_1 (pp) WP_055421506_1" source="2506" target="2512" cy:directed="1"/>
      <edge id="27989" label="WP_103530696_1 (pp) WP_114400345_1" source="2506" target="2511" cy:directed="1"/>
      <edge id="27988" label="WP_103530696_1 (pp) WP_093766414_4" source="2506" target="2510" cy:directed="1"/>
      <edge id="27987" label="WP_103530696_1 (pp) WP_078760898_1" source="2506" target="2509" cy:directed="1"/>
      <edge id="27986" label="WP_103530696_1 (pp) WP_073815370_1" source="2506" target="2508" cy:directed="1"/>
      <edge id="27985" label="WP_103530696_1 (pp) WP_053556805_1" source="2506" target="2507" cy:directed="1"/>
      <edge id="27984" label="WP_103530696_1 (pp) WP_115920406_2" source="2506" target="2545" cy:directed="1"/>
      <edge id="27983" label="WP_103530696_1 (pp) WP_093355673_1" source="2506" target="2505" cy:directed="1"/>
      <edge id="27982" label="WP_103530696_1 (pp) ALG08515_1" source="2506" target="2544" cy:directed="1"/>
      <edge id="27981" label="WP_103530696_1 (pp) OKI12399_1" source="2506" target="2504" cy:directed="1"/>
      <edge id="27980" label="WP_103530696_1 (pp) WP_071934999_2" source="2506" target="2503" cy:directed="1"/>
      <edge id="27979" label="WP_103530696_1 (pp) WP_087767686_1" source="2506" target="2502" cy:directed="1"/>
      <edge id="27978" label="WP_103530696_1 (pp) OQO95173_1" source="2506" target="2501" cy:directed="1"/>
      <edge id="27977" label="WP_103530696_1 (pp) WP_029987712_1" source="2506" target="2500" cy:directed="1"/>
      <edge id="27976" label="WP_103530696_1 (pp) WP_018847808_1" source="2506" target="2499" cy:directed="1"/>
      <edge id="27975" label="WP_103530696_1 (pp) KWX01007_1" source="2506" target="2498" cy:directed="1"/>
      <edge id="27974" label="WP_103530696_1 (pp) WP_123813761_1" source="2506" target="2496" cy:directed="1"/>
      <edge id="27973" label="WP_103530696_1 (pp) OLO29347_1" source="2506" target="2495" cy:directed="1"/>
      <edge id="27972" label="WP_103530696_1 (pp) WP_113689373_1" source="2506" target="2493" cy:directed="1"/>
      <edge id="27971" label="WP_103530696_1 (pp) WP_121830363_1" source="2506" target="2543" cy:directed="1"/>
      <edge id="27970" label="WP_103530696_1 (pp) WP_095752644_1" source="2506" target="2492" cy:directed="1"/>
      <edge id="27969" label="WP_103530696_1 (pp) RLV71217_1" source="2506" target="2491" cy:directed="1"/>
      <edge id="27968" label="WP_103530696_1 (pp) WP_107004474_1" source="2506" target="2542" cy:directed="1"/>
      <edge id="27967" label="WP_103530696_1 (pp) WP_097634704_1" source="2506" target="2490" cy:directed="1"/>
      <edge id="27966" label="WP_103530696_1 (pp) PXY18584_1" source="2506" target="2489" cy:directed="1"/>
      <edge id="27965" label="WP_103530696_1 (pp) WP_083753877_2" source="2506" target="2488" cy:directed="1"/>
      <edge id="27964" label="WP_103530696_1 (pp) WP_109162285_1" source="2506" target="2487" cy:directed="1"/>
      <edge id="27963" label="WP_103530696_1 (pp) KKI16967_3" source="2506" target="2486" cy:directed="1"/>
      <edge id="27962" label="WP_103530696_1 (pp) WP_081907113_1" source="2506" target="2541" cy:directed="1"/>
      <edge id="27961" label="WP_103530696_1 (pp) WP_084252732_3" source="2506" target="2485" cy:directed="1"/>
      <edge id="27960" label="WP_103530696_1 (pp) SJZ81173_1" source="2506" target="2484" cy:directed="1"/>
      <edge id="27959" label="WP_103530696_1 (pp) WP_103467468_1" source="2506" target="2483" cy:directed="1"/>
      <edge id="27958" label="WP_103530696_1 (pp) WP_033300563_1" source="2506" target="2482" cy:directed="1"/>
      <edge id="27957" label="WP_103530696_1 (pp) WP_058632033_1" source="2506" target="2481" cy:directed="1"/>
      <edge id="27956" label="WP_103530696_1 (pp) WP_078612341_1" source="2506" target="2480" cy:directed="1"/>
      <edge id="27955" label="WP_103530696_1 (pp) WP_059008183_2" source="2506" target="2479" cy:directed="1"/>
      <edge id="27954" label="WP_103530696_1 (pp) WP_073876556_1" source="2506" target="2540" cy:directed="1"/>
      <edge id="27953" label="WP_103530696_1 (pp) WP_008409979_1" source="2506" target="2478" cy:directed="1"/>
      <edge id="27952" label="WP_103530696_1 (pp) WP_116112318_1" source="2506" target="2477" cy:directed="1"/>
      <edge id="27951" label="WP_103530696_1 (pp) WP_031002210_2" source="2506" target="2476" cy:directed="1"/>
      <edge id="27950" label="WP_103530696_1 (pp) ALC19908_1" source="2506" target="2475" cy:directed="1"/>
      <edge id="27949" label="WP_103530696_1 (pp) WP_015100718_1" source="2506" target="2474" cy:directed="1"/>
      <edge id="27948" label="WP_103530696_1 (pp) WP_006501818_1" source="2506" target="2473" cy:directed="1"/>
      <edge id="27947" label="WP_103530696_1 (pp) WP_055689909_1" source="2506" target="2472" cy:directed="1"/>
      <edge id="27946" label="WP_103530696_1 (pp) WP_121007506_1" source="2506" target="2471" cy:directed="1"/>
      <edge id="27945" label="WP_103530696_1 (pp) WP_058915320_1" source="2506" target="2470" cy:directed="1"/>
      <edge id="27944" label="WP_103530696_1 (pp) WP_105722094_1" source="2506" target="2469" cy:directed="1"/>
      <edge id="27943" label="WP_103530696_1 (pp) WP_109186559_1" source="2506" target="2468" cy:directed="1"/>
      <edge id="27942" label="WP_103530696_1 (pp) SED75494_1" source="2506" target="2467" cy:directed="1"/>
      <edge id="27941" label="WP_103530696_1 (pp) WP_111250567_1" source="2506" target="2466" cy:directed="1"/>
      <edge id="27940" label="WP_103530696_1 (pp) WP_062924764_1" source="2506" target="2464" cy:directed="1"/>
      <edge id="27939" label="WP_103530696_1 (pp) WP_053623192_1" source="2506" target="2539" cy:directed="1"/>
      <edge id="27938" label="WP_103530696_1 (pp) WP_093655900_5" source="2506" target="2463" cy:directed="1"/>
      <edge id="27937" label="WP_103530696_1 (pp) WP_105527259_1" source="2506" target="2462" cy:directed="1"/>
      <edge id="27936" label="WP_103530696_1 (pp) WP_048574296_1" source="2506" target="2461" cy:directed="1"/>
      <edge id="27935" label="WP_103530696_1 (pp) WP_052852666_2" source="2506" target="2460" cy:directed="1"/>
      <edge id="27934" label="WP_103530696_1 (pp) WP_066976558_1" source="2506" target="2459" cy:directed="1"/>
      <edge id="27933" label="WP_103530696_1 (pp) RPK87717_1" source="2506" target="2538" cy:directed="1"/>
      <edge id="27932" label="WP_103530696_1 (pp) WP_081663146_1" source="2506" target="2457" cy:directed="1"/>
      <edge id="27931" label="WP_103530696_1 (pp) WP_116951408_3" source="2506" target="2537" cy:directed="1"/>
      <edge id="27930" label="WP_103530696_1 (pp) WP_043461231_1" source="2506" target="2455" cy:directed="1"/>
      <edge id="27929" label="WP_103530696_1 (pp) WP_077689962_1" source="2506" target="2454" cy:directed="1"/>
      <edge id="27928" label="WP_103530696_1 (pp) WP_129802804_1" source="2506" target="2536" cy:directed="1"/>
      <edge id="27927" label="WP_103530696_1 (pp) WP_028327189_1" source="2506" target="2453" cy:directed="1"/>
      <edge id="27926" label="WP_103530696_1 (pp) WP_016691947_2" source="2506" target="2452" cy:directed="1"/>
      <edge id="27925" label="WP_103530696_1 (pp) EHM27670_1" source="2506" target="2535" cy:directed="1"/>
      <edge id="27924" label="WP_103530696_1 (pp) WP_070343622_1" source="2506" target="2451" cy:directed="1"/>
      <edge id="27923" label="WP_103530696_1 (pp) OKI46856_1" source="2506" target="2450" cy:directed="1"/>
      <edge id="27922" label="WP_103530696_1 (pp) WP_125509413_1" source="2506" target="2449" cy:directed="1"/>
      <edge id="27921" label="WP_103530696_1 (pp) CEL19833_1" source="2506" target="2448" cy:directed="1"/>
      <edge id="27920" label="WP_103530696_1 (pp) WP_010048307_1" source="2506" target="2447" cy:directed="1"/>
      <edge id="27919" label="WP_103530696_1 (pp) WP_030701973_1" source="2506" target="2446" cy:directed="1"/>
      <edge id="27918" label="WP_103530696_1 (pp) WP_033318793_2" source="2506" target="2445" cy:directed="1"/>
      <edge id="27917" label="WP_103530696_1 (pp) WP_083472659_1" source="2506" target="2444" cy:directed="1"/>
      <edge id="27916" label="WP_103530696_1 (pp) WP_112271410_1" source="2506" target="2443" cy:directed="1"/>
      <edge id="27915" label="WP_093355673_1 (pp) ONI75210_2" source="2505" target="2552" cy:directed="1"/>
      <edge id="27914" label="WP_093355673_1 (pp) WP_086780456_1" source="2505" target="2551" cy:directed="1"/>
      <edge id="27913" label="WP_093355673_1 (pp) WP_040271779_1" source="2505" target="2553" cy:directed="1"/>
      <edge id="27912" label="WP_093355673_1 (pp) WP_067284698_3" source="2505" target="2533" cy:directed="1"/>
      <edge id="27911" label="WP_093355673_1 (pp) WP_055876321_1" source="2505" target="2550" cy:directed="1"/>
      <edge id="27910" label="WP_093355673_1 (pp) WP_125937921_2" source="2505" target="2549" cy:directed="1"/>
      <edge id="27909" label="WP_093355673_1 (pp) WP_081761968_1" source="2505" target="2548" cy:directed="1"/>
      <edge id="27908" label="WP_093355673_1 (pp) WP_130451801_3" source="2505" target="2529" cy:directed="1"/>
      <edge id="27907" label="WP_093355673_1 (pp) WP_096287923_1" source="2505" target="2547" cy:directed="1"/>
      <edge id="27906" label="WP_093355673_1 (pp) WP_090858762_1" source="2505" target="2546" cy:directed="1"/>
      <edge id="27905" label="WP_093355673_1 (pp) WP_017594221_1" source="2505" target="2523" cy:directed="1"/>
      <edge id="27904" label="WP_093355673_1 (pp) WP_037939130_1" source="2505" target="2516" cy:directed="1"/>
      <edge id="27903" label="WP_093355673_1 (pp) WP_114400345_1" source="2505" target="2511" cy:directed="1"/>
      <edge id="27902" label="WP_093355673_1 (pp) WP_078760898_1" source="2505" target="2509" cy:directed="1"/>
      <edge id="27901" label="WP_093355673_1 (pp) WP_053556805_1" source="2505" target="2507" cy:directed="1"/>
      <edge id="27900" label="WP_093355673_1 (pp) WP_115920406_2" source="2505" target="2545" cy:directed="1"/>
      <edge id="27899" label="WP_093355673_1 (pp) ALG08515_1" source="2505" target="2544" cy:directed="1"/>
      <edge id="27898" label="WP_093355673_1 (pp) WP_098957614_1" source="2505" target="2386" cy:directed="1"/>
      <edge id="27897" label="WP_093355673_1 (pp) WP_121830363_1" source="2505" target="2543" cy:directed="1"/>
      <edge id="27896" label="WP_093355673_1 (pp) WP_107004474_1" source="2505" target="2542" cy:directed="1"/>
      <edge id="27895" label="WP_093355673_1 (pp) WP_081907113_1" source="2505" target="2541" cy:directed="1"/>
      <edge id="27894" label="WP_093355673_1 (pp) WP_073876556_1" source="2505" target="2540" cy:directed="1"/>
      <edge id="27893" label="WP_093355673_1 (pp) WP_053623192_1" source="2505" target="2539" cy:directed="1"/>
      <edge id="27892" label="WP_093355673_1 (pp) RPK87717_1" source="2505" target="2538" cy:directed="1"/>
      <edge id="27891" label="WP_093355673_1 (pp) WP_116951408_3" source="2505" target="2537" cy:directed="1"/>
      <edge id="27890" label="WP_093355673_1 (pp) WP_129802804_1" source="2505" target="2536" cy:directed="1"/>
      <edge id="27889" label="WP_093355673_1 (pp) EHM27670_1" source="2505" target="2535" cy:directed="1"/>
      <edge id="27888" label="OKI12399_1 (pp) ONI75210_2" source="2504" target="2552" cy:directed="1"/>
      <edge id="27887" label="OKI12399_1 (pp) WP_086780456_1" source="2504" target="2551" cy:directed="1"/>
      <edge id="27886" label="OKI12399_1 (pp) WP_040271779_1" source="2504" target="2553" cy:directed="1"/>
      <edge id="27885" label="OKI12399_1 (pp) WP_067284698_3" source="2504" target="2533" cy:directed="1"/>
      <edge id="27884" label="OKI12399_1 (pp) WP_055876321_1" source="2504" target="2550" cy:directed="1"/>
      <edge id="27883" label="OKI12399_1 (pp) WP_027743449_4" source="2504" target="2532" cy:directed="1"/>
      <edge id="27882" label="OKI12399_1 (pp) WP_125937921_2" source="2504" target="2549" cy:directed="1"/>
      <edge id="27881" label="OKI12399_1 (pp) WP_017627596_1" source="2504" target="2531" cy:directed="1"/>
      <edge id="27880" label="OKI12399_1 (pp) WP_110343524_1" source="2504" target="2530" cy:directed="1"/>
      <edge id="27879" label="OKI12399_1 (pp) WP_081761968_1" source="2504" target="2548" cy:directed="1"/>
      <edge id="27878" label="OKI12399_1 (pp) WP_130451801_3" source="2504" target="2529" cy:directed="1"/>
      <edge id="27877" label="OKI12399_1 (pp) WP_084752844_1" source="2504" target="2528" cy:directed="1"/>
      <edge id="27876" label="OKI12399_1 (pp) WP_006350677_1" source="2504" target="2527" cy:directed="1"/>
      <edge id="27875" label="OKI12399_1 (pp) WP_096287923_1" source="2504" target="2547" cy:directed="1"/>
      <edge id="27874" label="OKI12399_1 (pp) WP_083467034_1" source="2504" target="2525" cy:directed="1"/>
      <edge id="27873" label="OKI12399_1 (pp) WP_090858762_1" source="2504" target="2546" cy:directed="1"/>
      <edge id="27872" label="OKI12399_1 (pp) WP_105672644_2" source="2504" target="2524" cy:directed="1"/>
      <edge id="27871" label="OKI12399_1 (pp) WP_017594221_1" source="2504" target="2523" cy:directed="1"/>
      <edge id="27870" label="OKI12399_1 (pp) WP_015613007_1" source="2504" target="2522" cy:directed="1"/>
      <edge id="27869" label="OKI12399_1 (pp) WP_038682890_3" source="2504" target="2520" cy:directed="1"/>
      <edge id="27868" label="OKI12399_1 (pp) WP_073770697_1" source="2504" target="2519" cy:directed="1"/>
      <edge id="27867" label="OKI12399_1 (pp) WP_110470681_1" source="2504" target="2517" cy:directed="1"/>
      <edge id="27866" label="OKI12399_1 (pp) WP_037939130_1" source="2504" target="2516" cy:directed="1"/>
      <edge id="27865" label="OKI12399_1 (pp) WP_064722319_1" source="2504" target="2513" cy:directed="1"/>
      <edge id="27864" label="OKI12399_1 (pp) WP_114400345_1" source="2504" target="2511" cy:directed="1"/>
      <edge id="27863" label="OKI12399_1 (pp) WP_093766414_4" source="2504" target="2510" cy:directed="1"/>
      <edge id="27862" label="OKI12399_1 (pp) WP_078760898_1" source="2504" target="2509" cy:directed="1"/>
      <edge id="27861" label="OKI12399_1 (pp) WP_073815370_1" source="2504" target="2508" cy:directed="1"/>
      <edge id="27860" label="OKI12399_1 (pp) WP_053556805_1" source="2504" target="2507" cy:directed="1"/>
      <edge id="27859" label="OKI12399_1 (pp) WP_115920406_2" source="2504" target="2545" cy:directed="1"/>
      <edge id="27858" label="OKI12399_1 (pp) WP_093355673_1" source="2504" target="2505" cy:directed="1"/>
      <edge id="27857" label="OKI12399_1 (pp) ALE78105_1" source="2504" target="2383" cy:directed="1"/>
      <edge id="27856" label="OKI12399_1 (pp) ALG08515_1" source="2504" target="2544" cy:directed="1"/>
      <edge id="27855" label="OKI12399_1 (pp) WP_071934999_2" source="2504" target="2503" cy:directed="1"/>
      <edge id="27854" label="OKI12399_1 (pp) WP_087767686_1" source="2504" target="2502" cy:directed="1"/>
      <edge id="27853" label="OKI12399_1 (pp) OQO95173_1" source="2504" target="2501" cy:directed="1"/>
      <edge id="27852" label="OKI12399_1 (pp) WP_018847808_1" source="2504" target="2499" cy:directed="1"/>
      <edge id="27851" label="OKI12399_1 (pp) WP_029987712_1" source="2504" target="2500" cy:directed="1"/>
      <edge id="27850" label="OKI12399_1 (pp) KWX01007_1" source="2504" target="2498" cy:directed="1"/>
      <edge id="27849" label="OKI12399_1 (pp) WP_123813761_1" source="2504" target="2496" cy:directed="1"/>
      <edge id="27848" label="OKI12399_1 (pp) OLO29347_1" source="2504" target="2495" cy:directed="1"/>
      <edge id="27847" label="OKI12399_1 (pp) WP_113689373_1" source="2504" target="2493" cy:directed="1"/>
      <edge id="27846" label="OKI12399_1 (pp) WP_121830363_1" source="2504" target="2543" cy:directed="1"/>
      <edge id="27845" label="OKI12399_1 (pp) RLV71217_1" source="2504" target="2491" cy:directed="1"/>
      <edge id="27844" label="OKI12399_1 (pp) WP_107004474_1" source="2504" target="2542" cy:directed="1"/>
      <edge id="27843" label="OKI12399_1 (pp) WP_097634704_1" source="2504" target="2490" cy:directed="1"/>
      <edge id="27842" label="OKI12399_1 (pp) PXY18584_1" source="2504" target="2489" cy:directed="1"/>
      <edge id="27841" label="OKI12399_1 (pp) WP_083753877_2" source="2504" target="2488" cy:directed="1"/>
      <edge id="27840" label="OKI12399_1 (pp) WP_109162285_1" source="2504" target="2487" cy:directed="1"/>
      <edge id="27839" label="OKI12399_1 (pp) WP_081907113_1" source="2504" target="2541" cy:directed="1"/>
      <edge id="27838" label="OKI12399_1 (pp) WP_084252732_3" source="2504" target="2485" cy:directed="1"/>
      <edge id="27837" label="OKI12399_1 (pp) SJZ81173_1" source="2504" target="2484" cy:directed="1"/>
      <edge id="27836" label="OKI12399_1 (pp) WP_103467468_1" source="2504" target="2483" cy:directed="1"/>
      <edge id="27835" label="OKI12399_1 (pp) WP_033300563_1" source="2504" target="2482" cy:directed="1"/>
      <edge id="27834" label="OKI12399_1 (pp) WP_078612341_1" source="2504" target="2480" cy:directed="1"/>
      <edge id="27833" label="OKI12399_1 (pp) WP_059008183_2" source="2504" target="2479" cy:directed="1"/>
      <edge id="27832" label="OKI12399_1 (pp) WP_073876556_1" source="2504" target="2540" cy:directed="1"/>
      <edge id="27831" label="OKI12399_1 (pp) WP_008409979_1" source="2504" target="2478" cy:directed="1"/>
      <edge id="27830" label="OKI12399_1 (pp) WP_116112318_1" source="2504" target="2477" cy:directed="1"/>
      <edge id="27829" label="OKI12399_1 (pp) WP_031002210_2" source="2504" target="2476" cy:directed="1"/>
      <edge id="27828" label="OKI12399_1 (pp) WP_015100718_1" source="2504" target="2474" cy:directed="1"/>
      <edge id="27827" label="OKI12399_1 (pp) ALC19908_1" source="2504" target="2475" cy:directed="1"/>
      <edge id="27826" label="OKI12399_1 (pp) WP_006501818_1" source="2504" target="2473" cy:directed="1"/>
      <edge id="27825" label="OKI12399_1 (pp) WP_055689909_1" source="2504" target="2472" cy:directed="1"/>
      <edge id="27824" label="OKI12399_1 (pp) WP_105722094_1" source="2504" target="2469" cy:directed="1"/>
      <edge id="27823" label="OKI12399_1 (pp) WP_109186559_1" source="2504" target="2468" cy:directed="1"/>
      <edge id="27822" label="OKI12399_1 (pp) SED75494_1" source="2504" target="2467" cy:directed="1"/>
      <edge id="27821" label="OKI12399_1 (pp) WP_111250567_1" source="2504" target="2466" cy:directed="1"/>
      <edge id="27820" label="OKI12399_1 (pp) WP_053623192_1" source="2504" target="2539" cy:directed="1"/>
      <edge id="27819" label="OKI12399_1 (pp) WP_062924764_1" source="2504" target="2464" cy:directed="1"/>
      <edge id="27818" label="OKI12399_1 (pp) WP_105527259_1" source="2504" target="2462" cy:directed="1"/>
      <edge id="27817" label="OKI12399_1 (pp) WP_048574296_1" source="2504" target="2461" cy:directed="1"/>
      <edge id="27816" label="OKI12399_1 (pp) WP_052852666_2" source="2504" target="2460" cy:directed="1"/>
      <edge id="27815" label="OKI12399_1 (pp) WP_066976558_1" source="2504" target="2459" cy:directed="1"/>
      <edge id="27814" label="OKI12399_1 (pp) RPK87717_1" source="2504" target="2538" cy:directed="1"/>
      <edge id="27813" label="OKI12399_1 (pp) WP_081663146_1" source="2504" target="2457" cy:directed="1"/>
      <edge id="27812" label="OKI12399_1 (pp) WP_116951408_3" source="2504" target="2537" cy:directed="1"/>
      <edge id="27811" label="OKI12399_1 (pp) WP_077689962_1" source="2504" target="2454" cy:directed="1"/>
      <edge id="27810" label="OKI12399_1 (pp) WP_129802804_1" source="2504" target="2536" cy:directed="1"/>
      <edge id="27809" label="OKI12399_1 (pp) WP_056298480_2" source="2504" target="2368" cy:directed="1"/>
      <edge id="27808" label="OKI12399_1 (pp) WP_028327189_1" source="2504" target="2453" cy:directed="1"/>
      <edge id="27807" label="OKI12399_1 (pp) EHM27670_1" source="2504" target="2535" cy:directed="1"/>
      <edge id="27806" label="OKI12399_1 (pp) WP_070343622_1" source="2504" target="2451" cy:directed="1"/>
      <edge id="27805" label="OKI12399_1 (pp) OKI46856_1" source="2504" target="2450" cy:directed="1"/>
      <edge id="27804" label="OKI12399_1 (pp) WP_125509413_1" source="2504" target="2449" cy:directed="1"/>
      <edge id="27803" label="OKI12399_1 (pp) WP_010048307_1" source="2504" target="2447" cy:directed="1"/>
      <edge id="27802" label="OKI12399_1 (pp) WP_030701973_1" source="2504" target="2446" cy:directed="1"/>
      <edge id="27801" label="OKI12399_1 (pp) WP_033318793_2" source="2504" target="2445" cy:directed="1"/>
      <edge id="27800" label="OKI12399_1 (pp) WP_112271410_1" source="2504" target="2443" cy:directed="1"/>
      <edge id="27799" label="WP_071934999_2 (pp) ONI75210_2" source="2503" target="2552" cy:directed="1"/>
      <edge id="27798" label="WP_071934999_2 (pp) WP_086780456_1" source="2503" target="2551" cy:directed="1"/>
      <edge id="27797" label="WP_071934999_2 (pp) WP_040271779_1" source="2503" target="2553" cy:directed="1"/>
      <edge id="27796" label="WP_071934999_2 (pp) WP_067284698_3" source="2503" target="2533" cy:directed="1"/>
      <edge id="27795" label="WP_071934999_2 (pp) WP_027743449_4" source="2503" target="2532" cy:directed="1"/>
      <edge id="27794" label="WP_071934999_2 (pp) WP_055876321_1" source="2503" target="2550" cy:directed="1"/>
      <edge id="27793" label="WP_071934999_2 (pp) WP_125937921_2" source="2503" target="2549" cy:directed="1"/>
      <edge id="27792" label="WP_071934999_2 (pp) WP_110343524_1" source="2503" target="2530" cy:directed="1"/>
      <edge id="27791" label="WP_071934999_2 (pp) WP_081761968_1" source="2503" target="2548" cy:directed="1"/>
      <edge id="27790" label="WP_071934999_2 (pp) WP_130451801_3" source="2503" target="2529" cy:directed="1"/>
      <edge id="27789" label="WP_071934999_2 (pp) WP_084752844_1" source="2503" target="2528" cy:directed="1"/>
      <edge id="27788" label="WP_071934999_2 (pp) WP_006350677_1" source="2503" target="2527" cy:directed="1"/>
      <edge id="27787" label="WP_071934999_2 (pp) WP_096287923_1" source="2503" target="2547" cy:directed="1"/>
      <edge id="27786" label="WP_071934999_2 (pp) WP_083467034_1" source="2503" target="2525" cy:directed="1"/>
      <edge id="27785" label="WP_071934999_2 (pp) WP_090858762_1" source="2503" target="2546" cy:directed="1"/>
      <edge id="27784" label="WP_071934999_2 (pp) WP_017594221_1" source="2503" target="2523" cy:directed="1"/>
      <edge id="27783" label="WP_071934999_2 (pp) WP_038682890_3" source="2503" target="2520" cy:directed="1"/>
      <edge id="27782" label="WP_071934999_2 (pp) WP_110470681_1" source="2503" target="2517" cy:directed="1"/>
      <edge id="27781" label="WP_071934999_2 (pp) WP_037939130_1" source="2503" target="2516" cy:directed="1"/>
      <edge id="27780" label="WP_071934999_2 (pp) WP_064722319_1" source="2503" target="2513" cy:directed="1"/>
      <edge id="27779" label="WP_071934999_2 (pp) WP_093766414_4" source="2503" target="2510" cy:directed="1"/>
      <edge id="27778" label="WP_071934999_2 (pp) WP_114400345_1" source="2503" target="2511" cy:directed="1"/>
      <edge id="27777" label="WP_071934999_2 (pp) WP_078760898_1" source="2503" target="2509" cy:directed="1"/>
      <edge id="27776" label="WP_071934999_2 (pp) WP_053556805_1" source="2503" target="2507" cy:directed="1"/>
      <edge id="27775" label="WP_071934999_2 (pp) WP_115920406_2" source="2503" target="2545" cy:directed="1"/>
      <edge id="27774" label="WP_071934999_2 (pp) WP_093355673_1" source="2503" target="2505" cy:directed="1"/>
      <edge id="27773" label="WP_071934999_2 (pp) ALE78105_1" source="2503" target="2383" cy:directed="1"/>
      <edge id="27772" label="WP_071934999_2 (pp) ALG08515_1" source="2503" target="2544" cy:directed="1"/>
      <edge id="27771" label="WP_071934999_2 (pp) WP_087767686_1" source="2503" target="2502" cy:directed="1"/>
      <edge id="27770" label="WP_071934999_2 (pp) OQO95173_1" source="2503" target="2501" cy:directed="1"/>
      <edge id="27769" label="WP_071934999_2 (pp) WP_018847808_1" source="2503" target="2499" cy:directed="1"/>
      <edge id="27768" label="WP_071934999_2 (pp) OLO29347_1" source="2503" target="2495" cy:directed="1"/>
      <edge id="27767" label="WP_071934999_2 (pp) WP_123813761_1" source="2503" target="2496" cy:directed="1"/>
      <edge id="27766" label="WP_071934999_2 (pp) WP_121830363_1" source="2503" target="2543" cy:directed="1"/>
      <edge id="27765" label="WP_071934999_2 (pp) WP_097634704_1" source="2503" target="2490" cy:directed="1"/>
      <edge id="27764" label="WP_071934999_2 (pp) WP_107004474_1" source="2503" target="2542" cy:directed="1"/>
      <edge id="27763" label="WP_071934999_2 (pp) WP_083753877_2" source="2503" target="2488" cy:directed="1"/>
      <edge id="27762" label="WP_071934999_2 (pp) WP_081907113_1" source="2503" target="2541" cy:directed="1"/>
      <edge id="27761" label="WP_071934999_2 (pp) WP_084252732_3" source="2503" target="2485" cy:directed="1"/>
      <edge id="27760" label="WP_071934999_2 (pp) WP_033300563_1" source="2503" target="2482" cy:directed="1"/>
      <edge id="27759" label="WP_071934999_2 (pp) WP_059008183_2" source="2503" target="2479" cy:directed="1"/>
      <edge id="27758" label="WP_071934999_2 (pp) WP_073876556_1" source="2503" target="2540" cy:directed="1"/>
      <edge id="27757" label="WP_071934999_2 (pp) WP_008409979_1" source="2503" target="2478" cy:directed="1"/>
      <edge id="27756" label="WP_071934999_2 (pp) WP_116112318_1" source="2503" target="2477" cy:directed="1"/>
      <edge id="27755" label="WP_071934999_2 (pp) WP_031002210_2" source="2503" target="2476" cy:directed="1"/>
      <edge id="27754" label="WP_071934999_2 (pp) WP_015100718_1" source="2503" target="2474" cy:directed="1"/>
      <edge id="27753" label="WP_071934999_2 (pp) WP_006501818_1" source="2503" target="2473" cy:directed="1"/>
      <edge id="27752" label="WP_071934999_2 (pp) WP_109186559_1" source="2503" target="2468" cy:directed="1"/>
      <edge id="27751" label="WP_071934999_2 (pp) SED75494_1" source="2503" target="2467" cy:directed="1"/>
      <edge id="27750" label="WP_071934999_2 (pp) WP_111250567_1" source="2503" target="2466" cy:directed="1"/>
      <edge id="27749" label="WP_071934999_2 (pp) WP_062924764_1" source="2503" target="2464" cy:directed="1"/>
      <edge id="27748" label="WP_071934999_2 (pp) WP_053623192_1" source="2503" target="2539" cy:directed="1"/>
      <edge id="27747" label="WP_071934999_2 (pp) WP_105527259_1" source="2503" target="2462" cy:directed="1"/>
      <edge id="27746" label="WP_071934999_2 (pp) WP_052852666_2" source="2503" target="2460" cy:directed="1"/>
      <edge id="27745" label="WP_071934999_2 (pp) WP_048574296_1" source="2503" target="2461" cy:directed="1"/>
      <edge id="27744" label="WP_071934999_2 (pp) WP_066976558_1" source="2503" target="2459" cy:directed="1"/>
      <edge id="27743" label="WP_071934999_2 (pp) RPK87717_1" source="2503" target="2538" cy:directed="1"/>
      <edge id="27742" label="WP_071934999_2 (pp) WP_081663146_1" source="2503" target="2457" cy:directed="1"/>
      <edge id="27741" label="WP_071934999_2 (pp) WP_116951408_3" source="2503" target="2537" cy:directed="1"/>
      <edge id="27740" label="WP_071934999_2 (pp) WP_077689962_1" source="2503" target="2454" cy:directed="1"/>
      <edge id="27739" label="WP_071934999_2 (pp) WP_129802804_1" source="2503" target="2536" cy:directed="1"/>
      <edge id="27738" label="WP_071934999_2 (pp) WP_056298480_2" source="2503" target="2368" cy:directed="1"/>
      <edge id="27737" label="WP_071934999_2 (pp) EHM27670_1" source="2503" target="2535" cy:directed="1"/>
      <edge id="27736" label="WP_071934999_2 (pp) WP_070343622_1" source="2503" target="2451" cy:directed="1"/>
      <edge id="27735" label="WP_071934999_2 (pp) OKI46856_1" source="2503" target="2450" cy:directed="1"/>
      <edge id="27734" label="WP_071934999_2 (pp) WP_010048307_1" source="2503" target="2447" cy:directed="1"/>
      <edge id="27733" label="WP_071934999_2 (pp) WP_030701973_1" source="2503" target="2446" cy:directed="1"/>
      <edge id="27732" label="WP_071934999_2 (pp) WP_033318793_2" source="2503" target="2445" cy:directed="1"/>
      <edge id="27731" label="WP_071934999_2 (pp) WP_112271410_1" source="2503" target="2443" cy:directed="1"/>
      <edge id="27730" label="WP_087767686_1 (pp) ONI75210_2" source="2502" target="2552" cy:directed="1"/>
      <edge id="27729" label="WP_087767686_1 (pp) WP_086780456_1" source="2502" target="2551" cy:directed="1"/>
      <edge id="27728" label="WP_087767686_1 (pp) WP_040271779_1" source="2502" target="2553" cy:directed="1"/>
      <edge id="27727" label="WP_087767686_1 (pp) WP_067284698_3" source="2502" target="2533" cy:directed="1"/>
      <edge id="27726" label="WP_087767686_1 (pp) WP_055876321_1" source="2502" target="2550" cy:directed="1"/>
      <edge id="27725" label="WP_087767686_1 (pp) WP_125937921_2" source="2502" target="2549" cy:directed="1"/>
      <edge id="27724" label="WP_087767686_1 (pp) WP_110343524_1" source="2502" target="2530" cy:directed="1"/>
      <edge id="27723" label="WP_087767686_1 (pp) WP_081761968_1" source="2502" target="2548" cy:directed="1"/>
      <edge id="27722" label="WP_087767686_1 (pp) WP_130451801_3" source="2502" target="2529" cy:directed="1"/>
      <edge id="27721" label="WP_087767686_1 (pp) WP_084752844_1" source="2502" target="2528" cy:directed="1"/>
      <edge id="27720" label="WP_087767686_1 (pp) WP_096287923_1" source="2502" target="2547" cy:directed="1"/>
      <edge id="27719" label="WP_087767686_1 (pp) WP_090858762_1" source="2502" target="2546" cy:directed="1"/>
      <edge id="27718" label="WP_087767686_1 (pp) WP_017594221_1" source="2502" target="2523" cy:directed="1"/>
      <edge id="27717" label="WP_087767686_1 (pp) WP_110470681_1" source="2502" target="2517" cy:directed="1"/>
      <edge id="27716" label="WP_087767686_1 (pp) WP_037939130_1" source="2502" target="2516" cy:directed="1"/>
      <edge id="27715" label="WP_087767686_1 (pp) WP_114400345_1" source="2502" target="2511" cy:directed="1"/>
      <edge id="27714" label="WP_087767686_1 (pp) WP_078760898_1" source="2502" target="2509" cy:directed="1"/>
      <edge id="27713" label="WP_087767686_1 (pp) WP_053556805_1" source="2502" target="2507" cy:directed="1"/>
      <edge id="27712" label="WP_087767686_1 (pp) WP_115920406_2" source="2502" target="2545" cy:directed="1"/>
      <edge id="27711" label="WP_087767686_1 (pp) WP_093355673_1" source="2502" target="2505" cy:directed="1"/>
      <edge id="27710" label="WP_087767686_1 (pp) ALG08515_1" source="2502" target="2544" cy:directed="1"/>
      <edge id="27709" label="WP_087767686_1 (pp) OQO95173_1" source="2502" target="2501" cy:directed="1"/>
      <edge id="27708" label="WP_087767686_1 (pp) WP_123813761_1" source="2502" target="2496" cy:directed="1"/>
      <edge id="27707" label="WP_087767686_1 (pp) WP_121830363_1" source="2502" target="2543" cy:directed="1"/>
      <edge id="27706" label="WP_087767686_1 (pp) WP_107004474_1" source="2502" target="2542" cy:directed="1"/>
      <edge id="27705" label="WP_087767686_1 (pp) WP_081907113_1" source="2502" target="2541" cy:directed="1"/>
      <edge id="27704" label="WP_087767686_1 (pp) WP_084252732_3" source="2502" target="2485" cy:directed="1"/>
      <edge id="27703" label="WP_087767686_1 (pp) WP_073876556_1" source="2502" target="2540" cy:directed="1"/>
      <edge id="27702" label="WP_087767686_1 (pp) WP_031002210_2" source="2502" target="2476" cy:directed="1"/>
      <edge id="27701" label="WP_087767686_1 (pp) WP_006501818_1" source="2502" target="2473" cy:directed="1"/>
      <edge id="27700" label="WP_087767686_1 (pp) WP_053623192_1" source="2502" target="2539" cy:directed="1"/>
      <edge id="27699" label="WP_087767686_1 (pp) WP_048574296_1" source="2502" target="2461" cy:directed="1"/>
      <edge id="27698" label="WP_087767686_1 (pp) WP_066976558_1" source="2502" target="2459" cy:directed="1"/>
      <edge id="27697" label="WP_087767686_1 (pp) RPK87717_1" source="2502" target="2538" cy:directed="1"/>
      <edge id="27696" label="WP_087767686_1 (pp) WP_081663146_1" source="2502" target="2457" cy:directed="1"/>
      <edge id="27695" label="WP_087767686_1 (pp) WP_116951408_3" source="2502" target="2537" cy:directed="1"/>
      <edge id="27694" label="WP_087767686_1 (pp) WP_129802804_1" source="2502" target="2536" cy:directed="1"/>
      <edge id="27693" label="WP_087767686_1 (pp) EHM27670_1" source="2502" target="2535" cy:directed="1"/>
      <edge id="27692" label="WP_087767686_1 (pp) WP_033318793_2" source="2502" target="2445" cy:directed="1"/>
      <edge id="27691" label="OQO95173_1 (pp) ONI75210_2" source="2501" target="2552" cy:directed="1"/>
      <edge id="27690" label="OQO95173_1 (pp) WP_086780456_1" source="2501" target="2551" cy:directed="1"/>
      <edge id="27689" label="OQO95173_1 (pp) WP_040271779_1" source="2501" target="2553" cy:directed="1"/>
      <edge id="27688" label="OQO95173_1 (pp) WP_067284698_3" source="2501" target="2533" cy:directed="1"/>
      <edge id="27687" label="OQO95173_1 (pp) WP_055876321_1" source="2501" target="2550" cy:directed="1"/>
      <edge id="27686" label="OQO95173_1 (pp) WP_125937921_2" source="2501" target="2549" cy:directed="1"/>
      <edge id="27685" label="OQO95173_1 (pp) WP_081761968_1" source="2501" target="2548" cy:directed="1"/>
      <edge id="27684" label="OQO95173_1 (pp) WP_130451801_3" source="2501" target="2529" cy:directed="1"/>
      <edge id="27683" label="OQO95173_1 (pp) WP_096287923_1" source="2501" target="2547" cy:directed="1"/>
      <edge id="27682" label="OQO95173_1 (pp) WP_090858762_1" source="2501" target="2546" cy:directed="1"/>
      <edge id="27681" label="OQO95173_1 (pp) WP_017594221_1" source="2501" target="2523" cy:directed="1"/>
      <edge id="27680" label="OQO95173_1 (pp) WP_037939130_1" source="2501" target="2516" cy:directed="1"/>
      <edge id="27679" label="OQO95173_1 (pp) WP_061787600_2" source="2501" target="2515" cy:directed="1"/>
      <edge id="27678" label="OQO95173_1 (pp) WP_114400345_1" source="2501" target="2511" cy:directed="1"/>
      <edge id="27677" label="OQO95173_1 (pp) WP_078760898_1" source="2501" target="2509" cy:directed="1"/>
      <edge id="27676" label="OQO95173_1 (pp) WP_053556805_1" source="2501" target="2507" cy:directed="1"/>
      <edge id="27675" label="OQO95173_1 (pp) WP_115920406_2" source="2501" target="2545" cy:directed="1"/>
      <edge id="27674" label="OQO95173_1 (pp) WP_093355673_1" source="2501" target="2505" cy:directed="1"/>
      <edge id="27673" label="OQO95173_1 (pp) ALG08515_1" source="2501" target="2544" cy:directed="1"/>
      <edge id="27672" label="OQO95173_1 (pp) WP_121830363_1" source="2501" target="2543" cy:directed="1"/>
      <edge id="27671" label="OQO95173_1 (pp) WP_107004474_1" source="2501" target="2542" cy:directed="1"/>
      <edge id="27670" label="OQO95173_1 (pp) WP_081907113_1" source="2501" target="2541" cy:directed="1"/>
      <edge id="27669" label="OQO95173_1 (pp) WP_073876556_1" source="2501" target="2540" cy:directed="1"/>
      <edge id="27668" label="OQO95173_1 (pp) WP_067823333_1" source="2501" target="2429" cy:directed="1"/>
      <edge id="27667" label="OQO95173_1 (pp) WP_053623192_1" source="2501" target="2539" cy:directed="1"/>
      <edge id="27666" label="OQO95173_1 (pp) RPK87717_1" source="2501" target="2538" cy:directed="1"/>
      <edge id="27665" label="OQO95173_1 (pp) WP_116951408_3" source="2501" target="2537" cy:directed="1"/>
      <edge id="27664" label="OQO95173_1 (pp) WP_129802804_1" source="2501" target="2536" cy:directed="1"/>
      <edge id="27663" label="OQO95173_1 (pp) EHM27670_1" source="2501" target="2535" cy:directed="1"/>
      <edge id="27662" label="WP_029987712_1 (pp) ONI75210_2" source="2500" target="2552" cy:directed="1"/>
      <edge id="27661" label="WP_029987712_1 (pp) WP_086780456_1" source="2500" target="2551" cy:directed="1"/>
      <edge id="27660" label="WP_029987712_1 (pp) WP_040271779_1" source="2500" target="2553" cy:directed="1"/>
      <edge id="27659" label="WP_029987712_1 (pp) WP_067284698_3" source="2500" target="2533" cy:directed="1"/>
      <edge id="27658" label="WP_029987712_1 (pp) WP_027743449_4" source="2500" target="2532" cy:directed="1"/>
      <edge id="27657" label="WP_029987712_1 (pp) WP_055876321_1" source="2500" target="2550" cy:directed="1"/>
      <edge id="27656" label="WP_029987712_1 (pp) WP_125937921_2" source="2500" target="2549" cy:directed="1"/>
      <edge id="27655" label="WP_029987712_1 (pp) WP_110343524_1" source="2500" target="2530" cy:directed="1"/>
      <edge id="27654" label="WP_029987712_1 (pp) WP_081761968_1" source="2500" target="2548" cy:directed="1"/>
      <edge id="27653" label="WP_029987712_1 (pp) WP_130451801_3" source="2500" target="2529" cy:directed="1"/>
      <edge id="27652" label="WP_029987712_1 (pp) WP_084752844_1" source="2500" target="2528" cy:directed="1"/>
      <edge id="27651" label="WP_029987712_1 (pp) WP_006350677_1" source="2500" target="2527" cy:directed="1"/>
      <edge id="27650" label="WP_029987712_1 (pp) WP_096287923_1" source="2500" target="2547" cy:directed="1"/>
      <edge id="27649" label="WP_029987712_1 (pp) WP_083467034_1" source="2500" target="2525" cy:directed="1"/>
      <edge id="27648" label="WP_029987712_1 (pp) WP_090858762_1" source="2500" target="2546" cy:directed="1"/>
      <edge id="27647" label="WP_029987712_1 (pp) WP_105672644_2" source="2500" target="2524" cy:directed="1"/>
      <edge id="27646" label="WP_029987712_1 (pp) WP_017594221_1" source="2500" target="2523" cy:directed="1"/>
      <edge id="27645" label="WP_029987712_1 (pp) WP_015613007_1" source="2500" target="2522" cy:directed="1"/>
      <edge id="27644" label="WP_029987712_1 (pp) WP_038682890_3" source="2500" target="2520" cy:directed="1"/>
      <edge id="27643" label="WP_029987712_1 (pp) WP_045196822_2" source="2500" target="2521" cy:directed="1"/>
      <edge id="27642" label="WP_029987712_1 (pp) WP_110470681_1" source="2500" target="2517" cy:directed="1"/>
      <edge id="27641" label="WP_029987712_1 (pp) WP_037939130_1" source="2500" target="2516" cy:directed="1"/>
      <edge id="27640" label="WP_029987712_1 (pp) WP_064722319_1" source="2500" target="2513" cy:directed="1"/>
      <edge id="27639" label="WP_029987712_1 (pp) WP_114400345_1" source="2500" target="2511" cy:directed="1"/>
      <edge id="27638" label="WP_029987712_1 (pp) WP_093766414_4" source="2500" target="2510" cy:directed="1"/>
      <edge id="27637" label="WP_029987712_1 (pp) WP_078760898_1" source="2500" target="2509" cy:directed="1"/>
      <edge id="27636" label="WP_029987712_1 (pp) WP_073815370_1" source="2500" target="2508" cy:directed="1"/>
      <edge id="27635" label="WP_029987712_1 (pp) WP_053556805_1" source="2500" target="2507" cy:directed="1"/>
      <edge id="27634" label="WP_029987712_1 (pp) WP_115920406_2" source="2500" target="2545" cy:directed="1"/>
      <edge id="27633" label="WP_029987712_1 (pp) WP_093355673_1" source="2500" target="2505" cy:directed="1"/>
      <edge id="27632" label="WP_029987712_1 (pp) ALE78105_1" source="2500" target="2383" cy:directed="1"/>
      <edge id="27631" label="WP_029987712_1 (pp) ALG08515_1" source="2500" target="2544" cy:directed="1"/>
      <edge id="27630" label="WP_029987712_1 (pp) WP_071934999_2" source="2500" target="2503" cy:directed="1"/>
      <edge id="27629" label="WP_029987712_1 (pp) WP_087767686_1" source="2500" target="2502" cy:directed="1"/>
      <edge id="27628" label="WP_029987712_1 (pp) OQO95173_1" source="2500" target="2501" cy:directed="1"/>
      <edge id="27627" label="WP_029987712_1 (pp) WP_018847808_1" source="2500" target="2499" cy:directed="1"/>
      <edge id="27626" label="WP_029987712_1 (pp) WP_123813761_1" source="2500" target="2496" cy:directed="1"/>
      <edge id="27625" label="WP_029987712_1 (pp) OLO29347_1" source="2500" target="2495" cy:directed="1"/>
      <edge id="27624" label="WP_029987712_1 (pp) WP_113689373_1" source="2500" target="2493" cy:directed="1"/>
      <edge id="27623" label="WP_029987712_1 (pp) WP_121830363_1" source="2500" target="2543" cy:directed="1"/>
      <edge id="27622" label="WP_029987712_1 (pp) RLV71217_1" source="2500" target="2491" cy:directed="1"/>
      <edge id="27621" label="WP_029987712_1 (pp) WP_097634704_1" source="2500" target="2490" cy:directed="1"/>
      <edge id="27620" label="WP_029987712_1 (pp) WP_107004474_1" source="2500" target="2542" cy:directed="1"/>
      <edge id="27619" label="WP_029987712_1 (pp) WP_083753877_2" source="2500" target="2488" cy:directed="1"/>
      <edge id="27618" label="WP_029987712_1 (pp) WP_081907113_1" source="2500" target="2541" cy:directed="1"/>
      <edge id="27617" label="WP_029987712_1 (pp) WP_084252732_3" source="2500" target="2485" cy:directed="1"/>
      <edge id="27616" label="WP_029987712_1 (pp) SJZ81173_1" source="2500" target="2484" cy:directed="1"/>
      <edge id="27615" label="WP_029987712_1 (pp) WP_103467468_1" source="2500" target="2483" cy:directed="1"/>
      <edge id="27614" label="WP_029987712_1 (pp) WP_033300563_1" source="2500" target="2482" cy:directed="1"/>
      <edge id="27613" label="WP_029987712_1 (pp) WP_078612341_1" source="2500" target="2480" cy:directed="1"/>
      <edge id="27612" label="WP_029987712_1 (pp) WP_059008183_2" source="2500" target="2479" cy:directed="1"/>
      <edge id="27611" label="WP_029987712_1 (pp) WP_008409979_1" source="2500" target="2478" cy:directed="1"/>
      <edge id="27610" label="WP_029987712_1 (pp) WP_073876556_1" source="2500" target="2540" cy:directed="1"/>
      <edge id="27609" label="WP_029987712_1 (pp) WP_116112318_1" source="2500" target="2477" cy:directed="1"/>
      <edge id="27608" label="WP_029987712_1 (pp) WP_031002210_2" source="2500" target="2476" cy:directed="1"/>
      <edge id="27607" label="WP_029987712_1 (pp) ALC19908_1" source="2500" target="2475" cy:directed="1"/>
      <edge id="27606" label="WP_029987712_1 (pp) WP_015100718_1" source="2500" target="2474" cy:directed="1"/>
      <edge id="27605" label="WP_029987712_1 (pp) WP_006501818_1" source="2500" target="2473" cy:directed="1"/>
      <edge id="27604" label="WP_029987712_1 (pp) WP_055689909_1" source="2500" target="2472" cy:directed="1"/>
      <edge id="27603" label="WP_029987712_1 (pp) WP_109186559_1" source="2500" target="2468" cy:directed="1"/>
      <edge id="27602" label="WP_029987712_1 (pp) SED75494_1" source="2500" target="2467" cy:directed="1"/>
      <edge id="27601" label="WP_029987712_1 (pp) WP_111250567_1" source="2500" target="2466" cy:directed="1"/>
      <edge id="27600" label="WP_029987712_1 (pp) WP_062924764_1" source="2500" target="2464" cy:directed="1"/>
      <edge id="27599" label="WP_029987712_1 (pp) WP_053623192_1" source="2500" target="2539" cy:directed="1"/>
      <edge id="27598" label="WP_029987712_1 (pp) WP_105527259_1" source="2500" target="2462" cy:directed="1"/>
      <edge id="27597" label="WP_029987712_1 (pp) WP_048574296_1" source="2500" target="2461" cy:directed="1"/>
      <edge id="27596" label="WP_029987712_1 (pp) WP_052852666_2" source="2500" target="2460" cy:directed="1"/>
      <edge id="27595" label="WP_029987712_1 (pp) WP_066976558_1" source="2500" target="2459" cy:directed="1"/>
      <edge id="27594" label="WP_029987712_1 (pp) RPK87717_1" source="2500" target="2538" cy:directed="1"/>
      <edge id="27593" label="WP_029987712_1 (pp) WP_081663146_1" source="2500" target="2457" cy:directed="1"/>
      <edge id="27592" label="WP_029987712_1 (pp) WP_116951408_3" source="2500" target="2537" cy:directed="1"/>
      <edge id="27591" label="WP_029987712_1 (pp) WP_077689962_1" source="2500" target="2454" cy:directed="1"/>
      <edge id="27590" label="WP_029987712_1 (pp) WP_129802804_1" source="2500" target="2536" cy:directed="1"/>
      <edge id="27589" label="WP_029987712_1 (pp) WP_056298480_2" source="2500" target="2368" cy:directed="1"/>
      <edge id="27588" label="WP_029987712_1 (pp) WP_028327189_1" source="2500" target="2453" cy:directed="1"/>
      <edge id="27587" label="WP_029987712_1 (pp) EHM27670_1" source="2500" target="2535" cy:directed="1"/>
      <edge id="27586" label="WP_029987712_1 (pp) WP_070343622_1" source="2500" target="2451" cy:directed="1"/>
      <edge id="27585" label="WP_029987712_1 (pp) OKI46856_1" source="2500" target="2450" cy:directed="1"/>
      <edge id="27584" label="WP_029987712_1 (pp) WP_010048307_1" source="2500" target="2447" cy:directed="1"/>
      <edge id="27583" label="WP_029987712_1 (pp) WP_030701973_1" source="2500" target="2446" cy:directed="1"/>
      <edge id="27582" label="WP_029987712_1 (pp) WP_033318793_2" source="2500" target="2445" cy:directed="1"/>
      <edge id="27581" label="WP_029987712_1 (pp) WP_112271410_1" source="2500" target="2443" cy:directed="1"/>
      <edge id="27580" label="WP_018847808_1 (pp) ONI75210_2" source="2499" target="2552" cy:directed="1"/>
      <edge id="27579" label="WP_018847808_1 (pp) WP_086780456_1" source="2499" target="2551" cy:directed="1"/>
      <edge id="27578" label="WP_018847808_1 (pp) WP_040271779_1" source="2499" target="2553" cy:directed="1"/>
      <edge id="27577" label="WP_018847808_1 (pp) WP_067284698_3" source="2499" target="2533" cy:directed="1"/>
      <edge id="27576" label="WP_018847808_1 (pp) WP_055876321_1" source="2499" target="2550" cy:directed="1"/>
      <edge id="27575" label="WP_018847808_1 (pp) WP_027743449_4" source="2499" target="2532" cy:directed="1"/>
      <edge id="27574" label="WP_018847808_1 (pp) WP_125937921_2" source="2499" target="2549" cy:directed="1"/>
      <edge id="27573" label="WP_018847808_1 (pp) WP_110343524_1" source="2499" target="2530" cy:directed="1"/>
      <edge id="27572" label="WP_018847808_1 (pp) WP_081761968_1" source="2499" target="2548" cy:directed="1"/>
      <edge id="27571" label="WP_018847808_1 (pp) WP_130451801_3" source="2499" target="2529" cy:directed="1"/>
      <edge id="27570" label="WP_018847808_1 (pp) WP_084752844_1" source="2499" target="2528" cy:directed="1"/>
      <edge id="27569" label="WP_018847808_1 (pp) WP_006350677_1" source="2499" target="2527" cy:directed="1"/>
      <edge id="27568" label="WP_018847808_1 (pp) WP_096287923_1" source="2499" target="2547" cy:directed="1"/>
      <edge id="27567" label="WP_018847808_1 (pp) WP_083467034_1" source="2499" target="2525" cy:directed="1"/>
      <edge id="27566" label="WP_018847808_1 (pp) WP_090858762_1" source="2499" target="2546" cy:directed="1"/>
      <edge id="27565" label="WP_018847808_1 (pp) WP_017594221_1" source="2499" target="2523" cy:directed="1"/>
      <edge id="27564" label="WP_018847808_1 (pp) WP_110470681_1" source="2499" target="2517" cy:directed="1"/>
      <edge id="27563" label="WP_018847808_1 (pp) WP_037939130_1" source="2499" target="2516" cy:directed="1"/>
      <edge id="27562" label="WP_018847808_1 (pp) WP_061787600_2" source="2499" target="2515" cy:directed="1"/>
      <edge id="27561" label="WP_018847808_1 (pp) WP_064722319_1" source="2499" target="2513" cy:directed="1"/>
      <edge id="27560" label="WP_018847808_1 (pp) WP_093766414_4" source="2499" target="2510" cy:directed="1"/>
      <edge id="27559" label="WP_018847808_1 (pp) WP_114400345_1" source="2499" target="2511" cy:directed="1"/>
      <edge id="27558" label="WP_018847808_1 (pp) WP_078760898_1" source="2499" target="2509" cy:directed="1"/>
      <edge id="27557" label="WP_018847808_1 (pp) WP_053556805_1" source="2499" target="2507" cy:directed="1"/>
      <edge id="27556" label="WP_018847808_1 (pp) WP_115920406_2" source="2499" target="2545" cy:directed="1"/>
      <edge id="27555" label="WP_018847808_1 (pp) WP_093355673_1" source="2499" target="2505" cy:directed="1"/>
      <edge id="27554" label="WP_018847808_1 (pp) ALG08515_1" source="2499" target="2544" cy:directed="1"/>
      <edge id="27553" label="WP_018847808_1 (pp) WP_087767686_1" source="2499" target="2502" cy:directed="1"/>
      <edge id="27552" label="WP_018847808_1 (pp) OQO95173_1" source="2499" target="2501" cy:directed="1"/>
      <edge id="27551" label="WP_018847808_1 (pp) OLO29347_1" source="2499" target="2495" cy:directed="1"/>
      <edge id="27550" label="WP_018847808_1 (pp) WP_123813761_1" source="2499" target="2496" cy:directed="1"/>
      <edge id="27549" label="WP_018847808_1 (pp) WP_121830363_1" source="2499" target="2543" cy:directed="1"/>
      <edge id="27548" label="WP_018847808_1 (pp) WP_107004474_1" source="2499" target="2542" cy:directed="1"/>
      <edge id="27547" label="WP_018847808_1 (pp) WP_097634704_1" source="2499" target="2490" cy:directed="1"/>
      <edge id="27546" label="WP_018847808_1 (pp) WP_081907113_1" source="2499" target="2541" cy:directed="1"/>
      <edge id="27545" label="WP_018847808_1 (pp) WP_084252732_3" source="2499" target="2485" cy:directed="1"/>
      <edge id="27544" label="WP_018847808_1 (pp) WP_059008183_2" source="2499" target="2479" cy:directed="1"/>
      <edge id="27543" label="WP_018847808_1 (pp) WP_008409979_1" source="2499" target="2478" cy:directed="1"/>
      <edge id="27542" label="WP_018847808_1 (pp) WP_073876556_1" source="2499" target="2540" cy:directed="1"/>
      <edge id="27541" label="WP_018847808_1 (pp) WP_116112318_1" source="2499" target="2477" cy:directed="1"/>
      <edge id="27540" label="WP_018847808_1 (pp) WP_031002210_2" source="2499" target="2476" cy:directed="1"/>
      <edge id="27539" label="WP_018847808_1 (pp) WP_015100718_1" source="2499" target="2474" cy:directed="1"/>
      <edge id="27538" label="WP_018847808_1 (pp) WP_006501818_1" source="2499" target="2473" cy:directed="1"/>
      <edge id="27537" label="WP_018847808_1 (pp) WP_111250567_1" source="2499" target="2466" cy:directed="1"/>
      <edge id="27536" label="WP_018847808_1 (pp) WP_053623192_1" source="2499" target="2539" cy:directed="1"/>
      <edge id="27535" label="WP_018847808_1 (pp) WP_105527259_1" source="2499" target="2462" cy:directed="1"/>
      <edge id="27534" label="WP_018847808_1 (pp) WP_052852666_2" source="2499" target="2460" cy:directed="1"/>
      <edge id="27533" label="WP_018847808_1 (pp) WP_048574296_1" source="2499" target="2461" cy:directed="1"/>
      <edge id="27532" label="WP_018847808_1 (pp) WP_066976558_1" source="2499" target="2459" cy:directed="1"/>
      <edge id="27531" label="WP_018847808_1 (pp) RPK87717_1" source="2499" target="2538" cy:directed="1"/>
      <edge id="27530" label="WP_018847808_1 (pp) WP_081663146_1" source="2499" target="2457" cy:directed="1"/>
      <edge id="27529" label="WP_018847808_1 (pp) WP_116951408_3" source="2499" target="2537" cy:directed="1"/>
      <edge id="27528" label="WP_018847808_1 (pp) WP_077689962_1" source="2499" target="2454" cy:directed="1"/>
      <edge id="27527" label="WP_018847808_1 (pp) WP_129802804_1" source="2499" target="2536" cy:directed="1"/>
      <edge id="27526" label="WP_018847808_1 (pp) EHM27670_1" source="2499" target="2535" cy:directed="1"/>
      <edge id="27525" label="WP_018847808_1 (pp) WP_010048307_1" source="2499" target="2447" cy:directed="1"/>
      <edge id="27524" label="WP_018847808_1 (pp) WP_030701973_1" source="2499" target="2446" cy:directed="1"/>
      <edge id="27523" label="WP_018847808_1 (pp) WP_033318793_2" source="2499" target="2445" cy:directed="1"/>
      <edge id="27522" label="WP_018847808_1 (pp) WP_112271410_1" source="2499" target="2443" cy:directed="1"/>
      <edge id="27521" label="KWX01007_1 (pp) ONI75210_2" source="2498" target="2552" cy:directed="1"/>
      <edge id="27520" label="KWX01007_1 (pp) WP_086780456_1" source="2498" target="2551" cy:directed="1"/>
      <edge id="27519" label="KWX01007_1 (pp) WP_040271779_1" source="2498" target="2553" cy:directed="1"/>
      <edge id="27518" label="KWX01007_1 (pp) WP_067284698_3" source="2498" target="2533" cy:directed="1"/>
      <edge id="27517" label="KWX01007_1 (pp) WP_055876321_1" source="2498" target="2550" cy:directed="1"/>
      <edge id="27516" label="KWX01007_1 (pp) WP_027743449_4" source="2498" target="2532" cy:directed="1"/>
      <edge id="27515" label="KWX01007_1 (pp) WP_125937921_2" source="2498" target="2549" cy:directed="1"/>
      <edge id="27514" label="KWX01007_1 (pp) WP_110343524_1" source="2498" target="2530" cy:directed="1"/>
      <edge id="27513" label="KWX01007_1 (pp) WP_081761968_1" source="2498" target="2548" cy:directed="1"/>
      <edge id="27512" label="KWX01007_1 (pp) WP_130451801_3" source="2498" target="2529" cy:directed="1"/>
      <edge id="27511" label="KWX01007_1 (pp) WP_084752844_1" source="2498" target="2528" cy:directed="1"/>
      <edge id="27510" label="KWX01007_1 (pp) WP_006350677_1" source="2498" target="2527" cy:directed="1"/>
      <edge id="27509" label="KWX01007_1 (pp) WP_096287923_1" source="2498" target="2547" cy:directed="1"/>
      <edge id="27508" label="KWX01007_1 (pp) WP_083467034_1" source="2498" target="2525" cy:directed="1"/>
      <edge id="27507" label="KWX01007_1 (pp) WP_090858762_1" source="2498" target="2546" cy:directed="1"/>
      <edge id="27506" label="KWX01007_1 (pp) WP_105672644_2" source="2498" target="2524" cy:directed="1"/>
      <edge id="27505" label="KWX01007_1 (pp) WP_017594221_1" source="2498" target="2523" cy:directed="1"/>
      <edge id="27504" label="KWX01007_1 (pp) WP_015613007_1" source="2498" target="2522" cy:directed="1"/>
      <edge id="27503" label="KWX01007_1 (pp) WP_045196822_2" source="2498" target="2521" cy:directed="1"/>
      <edge id="27502" label="KWX01007_1 (pp) WP_038682890_3" source="2498" target="2520" cy:directed="1"/>
      <edge id="27501" label="KWX01007_1 (pp) WP_110470681_1" source="2498" target="2517" cy:directed="1"/>
      <edge id="27500" label="KWX01007_1 (pp) WP_037939130_1" source="2498" target="2516" cy:directed="1"/>
      <edge id="27499" label="KWX01007_1 (pp) WP_064722319_1" source="2498" target="2513" cy:directed="1"/>
      <edge id="27498" label="KWX01007_1 (pp) WP_114400345_1" source="2498" target="2511" cy:directed="1"/>
      <edge id="27497" label="KWX01007_1 (pp) WP_093766414_4" source="2498" target="2510" cy:directed="1"/>
      <edge id="27496" label="KWX01007_1 (pp) WP_078760898_1" source="2498" target="2509" cy:directed="1"/>
      <edge id="27495" label="KWX01007_1 (pp) WP_073815370_1" source="2498" target="2508" cy:directed="1"/>
      <edge id="27494" label="KWX01007_1 (pp) WP_053556805_1" source="2498" target="2507" cy:directed="1"/>
      <edge id="27493" label="KWX01007_1 (pp) WP_115920406_2" source="2498" target="2545" cy:directed="1"/>
      <edge id="27492" label="KWX01007_1 (pp) WP_093355673_1" source="2498" target="2505" cy:directed="1"/>
      <edge id="27491" label="KWX01007_1 (pp) ALE78105_1" source="2498" target="2383" cy:directed="1"/>
      <edge id="27490" label="KWX01007_1 (pp) ALG08515_1" source="2498" target="2544" cy:directed="1"/>
      <edge id="27489" label="KWX01007_1 (pp) WP_071934999_2" source="2498" target="2503" cy:directed="1"/>
      <edge id="27488" label="KWX01007_1 (pp) WP_087767686_1" source="2498" target="2502" cy:directed="1"/>
      <edge id="27487" label="KWX01007_1 (pp) OQO95173_1" source="2498" target="2501" cy:directed="1"/>
      <edge id="27486" label="KWX01007_1 (pp) WP_018847808_1" source="2498" target="2499" cy:directed="1"/>
      <edge id="27485" label="KWX01007_1 (pp) WP_029987712_1" source="2498" target="2500" cy:directed="1"/>
      <edge id="27484" label="KWX01007_1 (pp) WP_123813761_1" source="2498" target="2496" cy:directed="1"/>
      <edge id="27483" label="KWX01007_1 (pp) OLO29347_1" source="2498" target="2495" cy:directed="1"/>
      <edge id="27482" label="KWX01007_1 (pp) WP_113689373_1" source="2498" target="2493" cy:directed="1"/>
      <edge id="27481" label="KWX01007_1 (pp) WP_121830363_1" source="2498" target="2543" cy:directed="1"/>
      <edge id="27480" label="KWX01007_1 (pp) RLV71217_1" source="2498" target="2491" cy:directed="1"/>
      <edge id="27479" label="KWX01007_1 (pp) WP_107004474_1" source="2498" target="2542" cy:directed="1"/>
      <edge id="27478" label="KWX01007_1 (pp) WP_097634704_1" source="2498" target="2490" cy:directed="1"/>
      <edge id="27477" label="KWX01007_1 (pp) WP_083753877_2" source="2498" target="2488" cy:directed="1"/>
      <edge id="27476" label="KWX01007_1 (pp) WP_084252732_3" source="2498" target="2485" cy:directed="1"/>
      <edge id="27475" label="KWX01007_1 (pp) SJZ81173_1" source="2498" target="2484" cy:directed="1"/>
      <edge id="27474" label="KWX01007_1 (pp) WP_103467468_1" source="2498" target="2483" cy:directed="1"/>
      <edge id="27473" label="KWX01007_1 (pp) WP_033300563_1" source="2498" target="2482" cy:directed="1"/>
      <edge id="27472" label="KWX01007_1 (pp) WP_078612341_1" source="2498" target="2480" cy:directed="1"/>
      <edge id="27471" label="KWX01007_1 (pp) WP_059008183_2" source="2498" target="2479" cy:directed="1"/>
      <edge id="27470" label="KWX01007_1 (pp) WP_073876556_1" source="2498" target="2540" cy:directed="1"/>
      <edge id="27469" label="KWX01007_1 (pp) WP_008409979_1" source="2498" target="2478" cy:directed="1"/>
      <edge id="27468" label="KWX01007_1 (pp) WP_116112318_1" source="2498" target="2477" cy:directed="1"/>
      <edge id="27467" label="KWX01007_1 (pp) WP_031002210_2" source="2498" target="2476" cy:directed="1"/>
      <edge id="27466" label="KWX01007_1 (pp) ALC19908_1" source="2498" target="2475" cy:directed="1"/>
      <edge id="27465" label="KWX01007_1 (pp) WP_015100718_1" source="2498" target="2474" cy:directed="1"/>
      <edge id="27464" label="KWX01007_1 (pp) WP_006501818_1" source="2498" target="2473" cy:directed="1"/>
      <edge id="27463" label="KWX01007_1 (pp) WP_055689909_1" source="2498" target="2472" cy:directed="1"/>
      <edge id="27462" label="KWX01007_1 (pp) WP_109186559_1" source="2498" target="2468" cy:directed="1"/>
      <edge id="27461" label="KWX01007_1 (pp) SED75494_1" source="2498" target="2467" cy:directed="1"/>
      <edge id="27460" label="KWX01007_1 (pp) WP_111250567_1" source="2498" target="2466" cy:directed="1"/>
      <edge id="27459" label="KWX01007_1 (pp) WP_062924764_1" source="2498" target="2464" cy:directed="1"/>
      <edge id="27458" label="KWX01007_1 (pp) WP_053623192_1" source="2498" target="2539" cy:directed="1"/>
      <edge id="27457" label="KWX01007_1 (pp) WP_105527259_1" source="2498" target="2462" cy:directed="1"/>
      <edge id="27456" label="KWX01007_1 (pp) WP_052852666_2" source="2498" target="2460" cy:directed="1"/>
      <edge id="27455" label="KWX01007_1 (pp) WP_048574296_1" source="2498" target="2461" cy:directed="1"/>
      <edge id="27454" label="KWX01007_1 (pp) WP_066976558_1" source="2498" target="2459" cy:directed="1"/>
      <edge id="27453" label="KWX01007_1 (pp) RPK87717_1" source="2498" target="2538" cy:directed="1"/>
      <edge id="27452" label="KWX01007_1 (pp) WP_081663146_1" source="2498" target="2457" cy:directed="1"/>
      <edge id="27451" label="KWX01007_1 (pp) WP_116951408_3" source="2498" target="2537" cy:directed="1"/>
      <edge id="27450" label="KWX01007_1 (pp) WP_077689962_1" source="2498" target="2454" cy:directed="1"/>
      <edge id="27449" label="KWX01007_1 (pp) WP_129802804_1" source="2498" target="2536" cy:directed="1"/>
      <edge id="27448" label="KWX01007_1 (pp) WP_028327189_1" source="2498" target="2453" cy:directed="1"/>
      <edge id="27447" label="KWX01007_1 (pp) EHM27670_1" source="2498" target="2535" cy:directed="1"/>
      <edge id="27446" label="KWX01007_1 (pp) WP_070343622_1" source="2498" target="2451" cy:directed="1"/>
      <edge id="27445" label="KWX01007_1 (pp) OKI46856_1" source="2498" target="2450" cy:directed="1"/>
      <edge id="27444" label="KWX01007_1 (pp) WP_010048307_1" source="2498" target="2447" cy:directed="1"/>
      <edge id="27443" label="KWX01007_1 (pp) WP_030701973_1" source="2498" target="2446" cy:directed="1"/>
      <edge id="27442" label="KWX01007_1 (pp) WP_033318793_2" source="2498" target="2445" cy:directed="1"/>
      <edge id="27441" label="KWX01007_1 (pp) WP_112271410_1" source="2498" target="2443" cy:directed="1"/>
      <edge id="27440" label="WP_075846085_2 (pp) ONI75210_2" source="2497" target="2552" cy:directed="1"/>
      <edge id="27439" label="WP_075846085_2 (pp) WP_086780456_1" source="2497" target="2551" cy:directed="1"/>
      <edge id="27438" label="WP_075846085_2 (pp) WP_040271779_1" source="2497" target="2553" cy:directed="1"/>
      <edge id="27437" label="WP_075846085_2 (pp) WP_067284698_3" source="2497" target="2533" cy:directed="1"/>
      <edge id="27436" label="WP_075846085_2 (pp) WP_027743449_4" source="2497" target="2532" cy:directed="1"/>
      <edge id="27435" label="WP_075846085_2 (pp) WP_055876321_1" source="2497" target="2550" cy:directed="1"/>
      <edge id="27434" label="WP_075846085_2 (pp) WP_125937921_2" source="2497" target="2549" cy:directed="1"/>
      <edge id="27433" label="WP_075846085_2 (pp) WP_017627596_1" source="2497" target="2531" cy:directed="1"/>
      <edge id="27432" label="WP_075846085_2 (pp) WP_110343524_1" source="2497" target="2530" cy:directed="1"/>
      <edge id="27431" label="WP_075846085_2 (pp) WP_081761968_1" source="2497" target="2548" cy:directed="1"/>
      <edge id="27430" label="WP_075846085_2 (pp) WP_130451801_3" source="2497" target="2529" cy:directed="1"/>
      <edge id="27429" label="WP_075846085_2 (pp) WP_084752844_1" source="2497" target="2528" cy:directed="1"/>
      <edge id="27428" label="WP_075846085_2 (pp) WP_006350677_1" source="2497" target="2527" cy:directed="1"/>
      <edge id="27427" label="WP_075846085_2 (pp) WP_094931980_2" source="2497" target="2526" cy:directed="1"/>
      <edge id="27426" label="WP_075846085_2 (pp) WP_096287923_1" source="2497" target="2547" cy:directed="1"/>
      <edge id="27425" label="WP_075846085_2 (pp) WP_083467034_1" source="2497" target="2525" cy:directed="1"/>
      <edge id="27424" label="WP_075846085_2 (pp) WP_090858762_1" source="2497" target="2546" cy:directed="1"/>
      <edge id="27423" label="WP_075846085_2 (pp) WP_105672644_2" source="2497" target="2524" cy:directed="1"/>
      <edge id="27422" label="WP_075846085_2 (pp) WP_017594221_1" source="2497" target="2523" cy:directed="1"/>
      <edge id="27421" label="WP_075846085_2 (pp) WP_015613007_1" source="2497" target="2522" cy:directed="1"/>
      <edge id="27420" label="WP_075846085_2 (pp) WP_038682890_3" source="2497" target="2520" cy:directed="1"/>
      <edge id="27419" label="WP_075846085_2 (pp) WP_045196822_2" source="2497" target="2521" cy:directed="1"/>
      <edge id="27418" label="WP_075846085_2 (pp) WP_073770697_1" source="2497" target="2519" cy:directed="1"/>
      <edge id="27417" label="WP_075846085_2 (pp) WP_089597075_1" source="2497" target="2518" cy:directed="1"/>
      <edge id="27416" label="WP_075846085_2 (pp) WP_110470681_1" source="2497" target="2517" cy:directed="1"/>
      <edge id="27415" label="WP_075846085_2 (pp) WP_037939130_1" source="2497" target="2516" cy:directed="1"/>
      <edge id="27414" label="WP_075846085_2 (pp) WP_017558654_2" source="2497" target="2514" cy:directed="1"/>
      <edge id="27413" label="WP_075846085_2 (pp) WP_064722319_1" source="2497" target="2513" cy:directed="1"/>
      <edge id="27412" label="WP_075846085_2 (pp) WP_055421506_1" source="2497" target="2512" cy:directed="1"/>
      <edge id="27411" label="WP_075846085_2 (pp) WP_114400345_1" source="2497" target="2511" cy:directed="1"/>
      <edge id="27410" label="WP_075846085_2 (pp) WP_093766414_4" source="2497" target="2510" cy:directed="1"/>
      <edge id="27409" label="WP_075846085_2 (pp) WP_078760898_1" source="2497" target="2509" cy:directed="1"/>
      <edge id="27408" label="WP_075846085_2 (pp) WP_073815370_1" source="2497" target="2508" cy:directed="1"/>
      <edge id="27407" label="WP_075846085_2 (pp) WP_053556805_1" source="2497" target="2507" cy:directed="1"/>
      <edge id="27406" label="WP_075846085_2 (pp) WP_103530696_1" source="2497" target="2506" cy:directed="1"/>
      <edge id="27405" label="WP_075846085_2 (pp) WP_115920406_2" source="2497" target="2545" cy:directed="1"/>
      <edge id="27404" label="WP_075846085_2 (pp) WP_093355673_1" source="2497" target="2505" cy:directed="1"/>
      <edge id="27403" label="WP_075846085_2 (pp) ALE78105_1" source="2497" target="2383" cy:directed="1"/>
      <edge id="27402" label="WP_075846085_2 (pp) ALG08515_1" source="2497" target="2544" cy:directed="1"/>
      <edge id="27401" label="WP_075846085_2 (pp) OKI12399_1" source="2497" target="2504" cy:directed="1"/>
      <edge id="27400" label="WP_075846085_2 (pp) WP_071934999_2" source="2497" target="2503" cy:directed="1"/>
      <edge id="27399" label="WP_075846085_2 (pp) WP_087767686_1" source="2497" target="2502" cy:directed="1"/>
      <edge id="27398" label="WP_075846085_2 (pp) OQO95173_1" source="2497" target="2501" cy:directed="1"/>
      <edge id="27397" label="WP_075846085_2 (pp) WP_018847808_1" source="2497" target="2499" cy:directed="1"/>
      <edge id="27396" label="WP_075846085_2 (pp) WP_029987712_1" source="2497" target="2500" cy:directed="1"/>
      <edge id="27395" label="WP_075846085_2 (pp) KWX01007_1" source="2497" target="2498" cy:directed="1"/>
      <edge id="27394" label="WP_075846085_2 (pp) WP_123813761_1" source="2497" target="2496" cy:directed="1"/>
      <edge id="27393" label="WP_075846085_2 (pp) OLO29347_1" source="2497" target="2495" cy:directed="1"/>
      <edge id="27392" label="WP_075846085_2 (pp) WP_113689373_1" source="2497" target="2493" cy:directed="1"/>
      <edge id="27391" label="WP_075846085_2 (pp) WP_095752644_1" source="2497" target="2492" cy:directed="1"/>
      <edge id="27390" label="WP_075846085_2 (pp) WP_121830363_1" source="2497" target="2543" cy:directed="1"/>
      <edge id="27389" label="WP_075846085_2 (pp) RLV71217_1" source="2497" target="2491" cy:directed="1"/>
      <edge id="27388" label="WP_075846085_2 (pp) WP_097634704_1" source="2497" target="2490" cy:directed="1"/>
      <edge id="27387" label="WP_075846085_2 (pp) WP_107004474_1" source="2497" target="2542" cy:directed="1"/>
      <edge id="27386" label="WP_075846085_2 (pp) PXY18584_1" source="2497" target="2489" cy:directed="1"/>
      <edge id="27385" label="WP_075846085_2 (pp) WP_083753877_2" source="2497" target="2488" cy:directed="1"/>
      <edge id="27384" label="WP_075846085_2 (pp) WP_109162285_1" source="2497" target="2487" cy:directed="1"/>
      <edge id="27383" label="WP_075846085_2 (pp) KKI16967_3" source="2497" target="2486" cy:directed="1"/>
      <edge id="27382" label="WP_075846085_2 (pp) WP_081907113_1" source="2497" target="2541" cy:directed="1"/>
      <edge id="27381" label="WP_075846085_2 (pp) WP_084252732_3" source="2497" target="2485" cy:directed="1"/>
      <edge id="27380" label="WP_075846085_2 (pp) SJZ81173_1" source="2497" target="2484" cy:directed="1"/>
      <edge id="27379" label="WP_075846085_2 (pp) WP_103467468_1" source="2497" target="2483" cy:directed="1"/>
      <edge id="27378" label="WP_075846085_2 (pp) WP_033300563_1" source="2497" target="2482" cy:directed="1"/>
      <edge id="27377" label="WP_075846085_2 (pp) WP_058632033_1" source="2497" target="2481" cy:directed="1"/>
      <edge id="27376" label="WP_075846085_2 (pp) WP_078612341_1" source="2497" target="2480" cy:directed="1"/>
      <edge id="27375" label="WP_075846085_2 (pp) WP_059008183_2" source="2497" target="2479" cy:directed="1"/>
      <edge id="27374" label="WP_075846085_2 (pp) WP_008409979_1" source="2497" target="2478" cy:directed="1"/>
      <edge id="27373" label="WP_075846085_2 (pp) WP_073876556_1" source="2497" target="2540" cy:directed="1"/>
      <edge id="27372" label="WP_075846085_2 (pp) WP_116112318_1" source="2497" target="2477" cy:directed="1"/>
      <edge id="27371" label="WP_075846085_2 (pp) WP_031002210_2" source="2497" target="2476" cy:directed="1"/>
      <edge id="27370" label="WP_075846085_2 (pp) ALC19908_1" source="2497" target="2475" cy:directed="1"/>
      <edge id="27369" label="WP_075846085_2 (pp) WP_015100718_1" source="2497" target="2474" cy:directed="1"/>
      <edge id="27368" label="WP_075846085_2 (pp) WP_006501818_1" source="2497" target="2473" cy:directed="1"/>
      <edge id="27367" label="WP_075846085_2 (pp) WP_055689909_1" source="2497" target="2472" cy:directed="1"/>
      <edge id="27366" label="WP_075846085_2 (pp) WP_121007506_1" source="2497" target="2471" cy:directed="1"/>
      <edge id="27365" label="WP_075846085_2 (pp) WP_058915320_1" source="2497" target="2470" cy:directed="1"/>
      <edge id="27364" label="WP_075846085_2 (pp) WP_105722094_1" source="2497" target="2469" cy:directed="1"/>
      <edge id="27363" label="WP_075846085_2 (pp) WP_109186559_1" source="2497" target="2468" cy:directed="1"/>
      <edge id="27362" label="WP_075846085_2 (pp) SED75494_1" source="2497" target="2467" cy:directed="1"/>
      <edge id="27361" label="WP_075846085_2 (pp) WP_111250567_1" source="2497" target="2466" cy:directed="1"/>
      <edge id="27360" label="WP_075846085_2 (pp) WP_053623192_1" source="2497" target="2539" cy:directed="1"/>
      <edge id="27359" label="WP_075846085_2 (pp) WP_062924764_1" source="2497" target="2464" cy:directed="1"/>
      <edge id="27358" label="WP_075846085_2 (pp) WP_093655900_5" source="2497" target="2463" cy:directed="1"/>
      <edge id="27357" label="WP_075846085_2 (pp) WP_105527259_1" source="2497" target="2462" cy:directed="1"/>
      <edge id="27356" label="WP_075846085_2 (pp) WP_048574296_1" source="2497" target="2461" cy:directed="1"/>
      <edge id="27355" label="WP_075846085_2 (pp) WP_052852666_2" source="2497" target="2460" cy:directed="1"/>
      <edge id="27354" label="WP_075846085_2 (pp) WP_066976558_1" source="2497" target="2459" cy:directed="1"/>
      <edge id="27353" label="WP_075846085_2 (pp) RPK87717_1" source="2497" target="2538" cy:directed="1"/>
      <edge id="27352" label="WP_075846085_2 (pp) WP_081663146_1" source="2497" target="2457" cy:directed="1"/>
      <edge id="27351" label="WP_075846085_2 (pp) WP_116951408_3" source="2497" target="2537" cy:directed="1"/>
      <edge id="27350" label="WP_075846085_2 (pp) WP_077689962_1" source="2497" target="2454" cy:directed="1"/>
      <edge id="27349" label="WP_075846085_2 (pp) WP_043461231_1" source="2497" target="2455" cy:directed="1"/>
      <edge id="27348" label="WP_075846085_2 (pp) WP_129802804_1" source="2497" target="2536" cy:directed="1"/>
      <edge id="27347" label="WP_075846085_2 (pp) WP_028327189_1" source="2497" target="2453" cy:directed="1"/>
      <edge id="27346" label="WP_075846085_2 (pp) EHM27670_1" source="2497" target="2535" cy:directed="1"/>
      <edge id="27345" label="WP_075846085_2 (pp) WP_016691947_2" source="2497" target="2452" cy:directed="1"/>
      <edge id="27344" label="WP_075846085_2 (pp) WP_070343622_1" source="2497" target="2451" cy:directed="1"/>
      <edge id="27343" label="WP_075846085_2 (pp) OKI46856_1" source="2497" target="2450" cy:directed="1"/>
      <edge id="27342" label="WP_075846085_2 (pp) WP_125509413_1" source="2497" target="2449" cy:directed="1"/>
      <edge id="27341" label="WP_075846085_2 (pp) CEL19833_1" source="2497" target="2448" cy:directed="1"/>
      <edge id="27340" label="WP_075846085_2 (pp) WP_010048307_1" source="2497" target="2447" cy:directed="1"/>
      <edge id="27339" label="WP_075846085_2 (pp) WP_030701973_1" source="2497" target="2446" cy:directed="1"/>
      <edge id="27338" label="WP_075846085_2 (pp) WP_033318793_2" source="2497" target="2445" cy:directed="1"/>
      <edge id="27337" label="WP_075846085_2 (pp) WP_083472659_1" source="2497" target="2444" cy:directed="1"/>
      <edge id="27336" label="WP_075846085_2 (pp) WP_112271410_1" source="2497" target="2443" cy:directed="1"/>
      <edge id="27335" label="WP_123813761_1 (pp) ONI75210_2" source="2496" target="2552" cy:directed="1"/>
      <edge id="27334" label="WP_123813761_1 (pp) WP_086780456_1" source="2496" target="2551" cy:directed="1"/>
      <edge id="27333" label="WP_123813761_1 (pp) WP_040271779_1" source="2496" target="2553" cy:directed="1"/>
      <edge id="27332" label="WP_123813761_1 (pp) WP_067284698_3" source="2496" target="2533" cy:directed="1"/>
      <edge id="27331" label="WP_123813761_1 (pp) WP_055876321_1" source="2496" target="2550" cy:directed="1"/>
      <edge id="27330" label="WP_123813761_1 (pp) WP_125937921_2" source="2496" target="2549" cy:directed="1"/>
      <edge id="27329" label="WP_123813761_1 (pp) WP_081761968_1" source="2496" target="2548" cy:directed="1"/>
      <edge id="27328" label="WP_123813761_1 (pp) WP_130451801_3" source="2496" target="2529" cy:directed="1"/>
      <edge id="27327" label="WP_123813761_1 (pp) WP_096287923_1" source="2496" target="2547" cy:directed="1"/>
      <edge id="27326" label="WP_123813761_1 (pp) WP_017594221_1" source="2496" target="2523" cy:directed="1"/>
      <edge id="27325" label="WP_123813761_1 (pp) WP_037939130_1" source="2496" target="2516" cy:directed="1"/>
      <edge id="27324" label="WP_123813761_1 (pp) WP_114400345_1" source="2496" target="2511" cy:directed="1"/>
      <edge id="27323" label="WP_123813761_1 (pp) WP_078760898_1" source="2496" target="2509" cy:directed="1"/>
      <edge id="27322" label="WP_123813761_1 (pp) WP_053556805_1" source="2496" target="2507" cy:directed="1"/>
      <edge id="27321" label="WP_123813761_1 (pp) WP_115920406_2" source="2496" target="2545" cy:directed="1"/>
      <edge id="27320" label="WP_123813761_1 (pp) WP_093355673_1" source="2496" target="2505" cy:directed="1"/>
      <edge id="27319" label="WP_123813761_1 (pp) ALG08515_1" source="2496" target="2544" cy:directed="1"/>
      <edge id="27318" label="WP_123813761_1 (pp) OQO95173_1" source="2496" target="2501" cy:directed="1"/>
      <edge id="27317" label="WP_123813761_1 (pp) WP_121830363_1" source="2496" target="2543" cy:directed="1"/>
      <edge id="27316" label="WP_123813761_1 (pp) WP_107004474_1" source="2496" target="2542" cy:directed="1"/>
      <edge id="27315" label="WP_123813761_1 (pp) WP_081907113_1" source="2496" target="2541" cy:directed="1"/>
      <edge id="27314" label="WP_123813761_1 (pp) WP_073876556_1" source="2496" target="2540" cy:directed="1"/>
      <edge id="27313" label="WP_123813761_1 (pp) WP_053623192_1" source="2496" target="2539" cy:directed="1"/>
      <edge id="27312" label="WP_123813761_1 (pp) RPK87717_1" source="2496" target="2538" cy:directed="1"/>
      <edge id="27311" label="WP_123813761_1 (pp) WP_116951408_3" source="2496" target="2537" cy:directed="1"/>
      <edge id="27310" label="WP_123813761_1 (pp) WP_129802804_1" source="2496" target="2536" cy:directed="1"/>
      <edge id="27309" label="WP_123813761_1 (pp) EHM27670_1" source="2496" target="2535" cy:directed="1"/>
      <edge id="27308" label="OLO29347_1 (pp) ONI75210_2" source="2495" target="2552" cy:directed="1"/>
      <edge id="27307" label="OLO29347_1 (pp) WP_086780456_1" source="2495" target="2551" cy:directed="1"/>
      <edge id="27306" label="OLO29347_1 (pp) WP_040271779_1" source="2495" target="2553" cy:directed="1"/>
      <edge id="27305" label="OLO29347_1 (pp) WP_067284698_3" source="2495" target="2533" cy:directed="1"/>
      <edge id="27304" label="OLO29347_1 (pp) WP_055876321_1" source="2495" target="2550" cy:directed="1"/>
      <edge id="27303" label="OLO29347_1 (pp) WP_125937921_2" source="2495" target="2549" cy:directed="1"/>
      <edge id="27302" label="OLO29347_1 (pp) WP_110343524_1" source="2495" target="2530" cy:directed="1"/>
      <edge id="27301" label="OLO29347_1 (pp) WP_081761968_1" source="2495" target="2548" cy:directed="1"/>
      <edge id="27300" label="OLO29347_1 (pp) WP_130451801_3" source="2495" target="2529" cy:directed="1"/>
      <edge id="27299" label="OLO29347_1 (pp) WP_084752844_1" source="2495" target="2528" cy:directed="1"/>
      <edge id="27298" label="OLO29347_1 (pp) WP_096287923_1" source="2495" target="2547" cy:directed="1"/>
      <edge id="27297" label="OLO29347_1 (pp) WP_090858762_1" source="2495" target="2546" cy:directed="1"/>
      <edge id="27296" label="OLO29347_1 (pp) WP_017594221_1" source="2495" target="2523" cy:directed="1"/>
      <edge id="27295" label="OLO29347_1 (pp) WP_110470681_1" source="2495" target="2517" cy:directed="1"/>
      <edge id="27294" label="OLO29347_1 (pp) WP_037939130_1" source="2495" target="2516" cy:directed="1"/>
      <edge id="27293" label="OLO29347_1 (pp) WP_114400345_1" source="2495" target="2511" cy:directed="1"/>
      <edge id="27292" label="OLO29347_1 (pp) WP_078760898_1" source="2495" target="2509" cy:directed="1"/>
      <edge id="27291" label="OLO29347_1 (pp) WP_053556805_1" source="2495" target="2507" cy:directed="1"/>
      <edge id="27290" label="OLO29347_1 (pp) WP_115920406_2" source="2495" target="2545" cy:directed="1"/>
      <edge id="27289" label="OLO29347_1 (pp) WP_093355673_1" source="2495" target="2505" cy:directed="1"/>
      <edge id="27288" label="OLO29347_1 (pp) ALG08515_1" source="2495" target="2544" cy:directed="1"/>
      <edge id="27287" label="OLO29347_1 (pp) WP_087767686_1" source="2495" target="2502" cy:directed="1"/>
      <edge id="27286" label="OLO29347_1 (pp) OQO95173_1" source="2495" target="2501" cy:directed="1"/>
      <edge id="27285" label="OLO29347_1 (pp) WP_123813761_1" source="2495" target="2496" cy:directed="1"/>
      <edge id="27284" label="OLO29347_1 (pp) WP_121830363_1" source="2495" target="2543" cy:directed="1"/>
      <edge id="27283" label="OLO29347_1 (pp) WP_107004474_1" source="2495" target="2542" cy:directed="1"/>
      <edge id="27282" label="OLO29347_1 (pp) WP_081907113_1" source="2495" target="2541" cy:directed="1"/>
      <edge id="27281" label="OLO29347_1 (pp) WP_084252732_3" source="2495" target="2485" cy:directed="1"/>
      <edge id="27280" label="OLO29347_1 (pp) WP_059008183_2" source="2495" target="2479" cy:directed="1"/>
      <edge id="27279" label="OLO29347_1 (pp) WP_073876556_1" source="2495" target="2540" cy:directed="1"/>
      <edge id="27278" label="OLO29347_1 (pp) WP_008409979_1" source="2495" target="2478" cy:directed="1"/>
      <edge id="27277" label="OLO29347_1 (pp) WP_116112318_1" source="2495" target="2477" cy:directed="1"/>
      <edge id="27276" label="OLO29347_1 (pp) WP_031002210_2" source="2495" target="2476" cy:directed="1"/>
      <edge id="27275" label="OLO29347_1 (pp) WP_006501818_1" source="2495" target="2473" cy:directed="1"/>
      <edge id="27274" label="OLO29347_1 (pp) WP_053623192_1" source="2495" target="2539" cy:directed="1"/>
      <edge id="27273" label="OLO29347_1 (pp) WP_048574296_1" source="2495" target="2461" cy:directed="1"/>
      <edge id="27272" label="OLO29347_1 (pp) WP_066976558_1" source="2495" target="2459" cy:directed="1"/>
      <edge id="27271" label="OLO29347_1 (pp) RPK87717_1" source="2495" target="2538" cy:directed="1"/>
      <edge id="27270" label="OLO29347_1 (pp) WP_081663146_1" source="2495" target="2457" cy:directed="1"/>
      <edge id="27269" label="OLO29347_1 (pp) WP_116951408_3" source="2495" target="2537" cy:directed="1"/>
      <edge id="27268" label="OLO29347_1 (pp) WP_077689962_1" source="2495" target="2454" cy:directed="1"/>
      <edge id="27267" label="OLO29347_1 (pp) WP_129802804_1" source="2495" target="2536" cy:directed="1"/>
      <edge id="27266" label="OLO29347_1 (pp) EHM27670_1" source="2495" target="2535" cy:directed="1"/>
      <edge id="27265" label="OLO29347_1 (pp) WP_010048307_1" source="2495" target="2447" cy:directed="1"/>
      <edge id="27264" label="OLO29347_1 (pp) WP_033318793_2" source="2495" target="2445" cy:directed="1"/>
      <edge id="27263" label="OKJ27000_1 (pp) ONI75210_2" source="2494" target="2552" cy:directed="1"/>
      <edge id="27262" label="OKJ27000_1 (pp) WP_086780456_1" source="2494" target="2551" cy:directed="1"/>
      <edge id="27261" label="OKJ27000_1 (pp) WP_040271779_1" source="2494" target="2553" cy:directed="1"/>
      <edge id="27260" label="OKJ27000_1 (pp) WP_067284698_3" source="2494" target="2533" cy:directed="1"/>
      <edge id="27259" label="OKJ27000_1 (pp) WP_055876321_1" source="2494" target="2550" cy:directed="1"/>
      <edge id="27258" label="OKJ27000_1 (pp) WP_027743449_4" source="2494" target="2532" cy:directed="1"/>
      <edge id="27257" label="OKJ27000_1 (pp) WP_125937921_2" source="2494" target="2549" cy:directed="1"/>
      <edge id="27256" label="OKJ27000_1 (pp) WP_017627596_1" source="2494" target="2531" cy:directed="1"/>
      <edge id="27255" label="OKJ27000_1 (pp) WP_110343524_1" source="2494" target="2530" cy:directed="1"/>
      <edge id="27254" label="OKJ27000_1 (pp) WP_081761968_1" source="2494" target="2548" cy:directed="1"/>
      <edge id="27253" label="OKJ27000_1 (pp) WP_130451801_3" source="2494" target="2529" cy:directed="1"/>
      <edge id="27252" label="OKJ27000_1 (pp) WP_084752844_1" source="2494" target="2528" cy:directed="1"/>
      <edge id="27251" label="OKJ27000_1 (pp) WP_006350677_1" source="2494" target="2527" cy:directed="1"/>
      <edge id="27250" label="OKJ27000_1 (pp) WP_094931980_2" source="2494" target="2526" cy:directed="1"/>
      <edge id="27249" label="OKJ27000_1 (pp) WP_096287923_1" source="2494" target="2547" cy:directed="1"/>
      <edge id="27248" label="OKJ27000_1 (pp) WP_083467034_1" source="2494" target="2525" cy:directed="1"/>
      <edge id="27247" label="OKJ27000_1 (pp) WP_090858762_1" source="2494" target="2546" cy:directed="1"/>
      <edge id="27246" label="OKJ27000_1 (pp) WP_105672644_2" source="2494" target="2524" cy:directed="1"/>
      <edge id="27245" label="OKJ27000_1 (pp) WP_017594221_1" source="2494" target="2523" cy:directed="1"/>
      <edge id="27244" label="OKJ27000_1 (pp) WP_015613007_1" source="2494" target="2522" cy:directed="1"/>
      <edge id="27243" label="OKJ27000_1 (pp) WP_045196822_2" source="2494" target="2521" cy:directed="1"/>
      <edge id="27242" label="OKJ27000_1 (pp) WP_038682890_3" source="2494" target="2520" cy:directed="1"/>
      <edge id="27241" label="OKJ27000_1 (pp) WP_073770697_1" source="2494" target="2519" cy:directed="1"/>
      <edge id="27240" label="OKJ27000_1 (pp) WP_089597075_1" source="2494" target="2518" cy:directed="1"/>
      <edge id="27239" label="OKJ27000_1 (pp) WP_110470681_1" source="2494" target="2517" cy:directed="1"/>
      <edge id="27238" label="OKJ27000_1 (pp) WP_037939130_1" source="2494" target="2516" cy:directed="1"/>
      <edge id="27237" label="OKJ27000_1 (pp) WP_061787600_2" source="2494" target="2515" cy:directed="1"/>
      <edge id="27236" label="OKJ27000_1 (pp) WP_017558654_2" source="2494" target="2514" cy:directed="1"/>
      <edge id="27235" label="OKJ27000_1 (pp) WP_064722319_1" source="2494" target="2513" cy:directed="1"/>
      <edge id="27234" label="OKJ27000_1 (pp) WP_055421506_1" source="2494" target="2512" cy:directed="1"/>
      <edge id="27233" label="OKJ27000_1 (pp) WP_114400345_1" source="2494" target="2511" cy:directed="1"/>
      <edge id="27232" label="OKJ27000_1 (pp) WP_093766414_4" source="2494" target="2510" cy:directed="1"/>
      <edge id="27231" label="OKJ27000_1 (pp) WP_078760898_1" source="2494" target="2509" cy:directed="1"/>
      <edge id="27230" label="OKJ27000_1 (pp) WP_073815370_1" source="2494" target="2508" cy:directed="1"/>
      <edge id="27229" label="OKJ27000_1 (pp) WP_053556805_1" source="2494" target="2507" cy:directed="1"/>
      <edge id="27228" label="OKJ27000_1 (pp) WP_103530696_1" source="2494" target="2506" cy:directed="1"/>
      <edge id="27227" label="OKJ27000_1 (pp) WP_115920406_2" source="2494" target="2545" cy:directed="1"/>
      <edge id="27226" label="OKJ27000_1 (pp) WP_093355673_1" source="2494" target="2505" cy:directed="1"/>
      <edge id="27225" label="OKJ27000_1 (pp) ALG08515_1" source="2494" target="2544" cy:directed="1"/>
      <edge id="27224" label="OKJ27000_1 (pp) OKI12399_1" source="2494" target="2504" cy:directed="1"/>
      <edge id="27223" label="OKJ27000_1 (pp) WP_071934999_2" source="2494" target="2503" cy:directed="1"/>
      <edge id="27222" label="OKJ27000_1 (pp) WP_087767686_1" source="2494" target="2502" cy:directed="1"/>
      <edge id="27221" label="OKJ27000_1 (pp) OQO95173_1" source="2494" target="2501" cy:directed="1"/>
      <edge id="27220" label="OKJ27000_1 (pp) WP_029987712_1" source="2494" target="2500" cy:directed="1"/>
      <edge id="27219" label="OKJ27000_1 (pp) WP_018847808_1" source="2494" target="2499" cy:directed="1"/>
[truncated: 2,719,694 more chars]
