# Supplementary material for: Discovery and characterisation of an amidine-containing ribosomally-synthesised peptide that is widely distributed in nature
Source: Royal Society of Chemistry journal article supplement (doi:10.1039/d1sc01456k), 2021-01-01
Supplement: d1sc01456k2.cys [file d1sc01456k2.cys › CytoscapeSession-2019_12_19-13_30/properties/session.props]

#Written by: Cytoscape's PropertiesWriterImpl
#Thu Dec 19 13:31:03 GMT 2019
defaultSpeciesName=Saccharomyces cerevisiae
