# Supplementary material for: Discovery and characterisation of an amidine-containing ribosomally-synthesised peptide that is widely distributed in nature
Source: Royal Society of Chemistry journal article supplement (doi:10.1039/d1sc01456k), 2021-01-01
Supplement: d1sc01456k2.cys [file d1sc01456k2.cys › CytoscapeSession-2019_12_19-13_30/session_vizmap.xml]

<?xml version="1.0" encoding="UTF-8" standalone="yes"?>
<vizmap documentVersion="3.0" id="VizMap-2019_12_19-13_31">
    <visualStyle name="BioPAX_SIF">
        <network>
            <visualProperty name="NETWORK_BACKGROUND_PAINT" default="#FFFFFF"/>
        </network>
        <node>
            <dependency name="nodeCustomGraphicsSizeSync" value="true"/>
            <dependency name="nodeSizeLocked" value="false"/>
            <visualProperty name="NODE_TRANSPARENCY" default="125"/>
            <visualProperty name="NODE_SHAPE" default="ELLIPSE">
                <discreteMapping attributeType="string" attributeName="BIOPAX_TYPE">
                    <discreteMappingEntry value="HEXAGON" attributeValue="Complex"/>
                </discreteMapping>
            </visualProperty>
            <visualProperty name="NODE_LABEL">
                <passthroughMapping attributeType="string" attributeName="name"/>
            </visualProperty>
            <visualProperty name="NODE_FILL_COLOR" default="#FF9999">
                <discreteMapping attributeType="string" attributeName="BIOPAX_TYPE">
                    <discreteMappingEntry value="#99CCFF" attributeValue="Complex"/>
                </discreteMapping>
            </visualProperty>
        </node>
        <edge>
            <dependency name="arrowColorMatchesEdge" value="true"/>
            <visualProperty name="EDGE_TARGET_ARROW_SHAPE">
                <discreteMapping attributeType="string" attributeName="interaction">
                    <discreteMappingEntry value="ARROW" attributeValue="controls-expression-of"/>
                    <discreteMappingEntry value="ARROW" attributeValue="chemical-affects"/>
                    <discreteMappingEntry value="ARROW" attributeValue="controls-state-change-of"/>
                    <discreteMappingEntry value="ARROW" attributeValue="controls-phosphorylation-of"/>
                    <discreteMappingEntry value="ARROW" attributeValue="controls-transport-of-chemical"/>
                    <discreteMappingEntry value="ARROW" attributeValue="used-to-produce"/>
                    <discreteMappingEntry value="ARROW" attributeValue="controls-transport-of"/>
                    <discreteMappingEntry value="ARROW" attributeValue="consumption-controled-by"/>
                    <discreteMappingEntry value="ARROW" attributeValue="controls-production-of"/>
                    <discreteMappingEntry value="ARROW" attributeValue="catalysis-precedes"/>
                </discreteMapping>
            </visualProperty>
            <visualProperty name="EDGE_STROKE_UNSELECTED_PAINT" default="#000000">
                <discreteMapping attributeType="string" attributeName="interaction">
                    <discreteMappingEntry value="#005500" attributeValue="interacts-with"/>
                    <discreteMappingEntry value="#F09000" attributeValue="chemical-affects"/>
                    <discreteMappingEntry value="#0000C0" attributeValue="controls-state-change-of"/>
                    <discreteMappingEntry value="#700000" attributeValue="controls-transport-of"/>
                    <discreteMappingEntry value="#FF3300" attributeValue="consumption-controled-by"/>
                    <discreteMappingEntry value="#00FF00" attributeValue="reacts-with"/>
                    <discreteMappingEntry value="#00AA00" attributeValue="neighbor-of"/>
                    <discreteMappingEntry value="#00A0A0" attributeValue="controls-expression-of"/>
                    <discreteMappingEntry value="#0000FF" attributeValue="controls-phosphorylation-of"/>
                    <discreteMappingEntry value="#A00000" attributeValue="controls-transport-of-chemical"/>
                    <discreteMappingEntry value="#F75500" attributeValue="used-to-produce"/>
                    <discreteMappingEntry value="#F000A0" attributeValue="in-complex-with"/>
                    <discreteMappingEntry value="#00CCF0" attributeValue="controls-production-of"/>
                    <discreteMappingEntry value="#7000A0" attributeValue="catalysis-precedes"/>
                </discreteMapping>
            </visualProperty>
            <visualProperty name="EDGE_WIDTH" default="4.0"/>
            <visualProperty name="EDGE_UNSELECTED_PAINT" default="#000000">
                <discreteMapping attributeType="string" attributeName="interaction">
                    <discreteMappingEntry value="#005500" attributeValue="interacts-with"/>
                    <discreteMappingEntry value="#F09000" attributeValue="chemical-affects"/>
                    <discreteMappingEntry value="#0000C0" attributeValue="controls-state-change-of"/>
                    <discreteMappingEntry value="#700000" attributeValue="controls-transport-of"/>
                    <discreteMappingEntry value="#FF3300" attributeValue="consumption-controled-by"/>
                    <discreteMappingEntry value="#00FF00" attributeValue="reacts-with"/>
                    <discreteMappingEntry value="#00AA00" attributeValue="neighbor-of"/>
                    <discreteMappingEntry value="#00A0A0" attributeValue="controls-expression-of"/>
                    <discreteMappingEntry value="#0000FF" attributeValue="controls-phosphorylation-of"/>
                    <discreteMappingEntry value="#A00000" attributeValue="controls-transport-of-chemical"/>
                    <discreteMappingEntry value="#F75500" attributeValue="used-to-produce"/>
                    <discreteMappingEntry value="#F000A0" attributeValue="in-complex-with"/>
                    <discreteMappingEntry value="#00CCF0" attributeValue="controls-production-of"/>
                    <discreteMappingEntry value="#7000A0" attributeValue="catalysis-precedes"/>
                </discreteMapping>
            </visualProperty>
        </edge>
    </visualStyle>
    <visualStyle name="Minimal">
        <network>
            <visualProperty name="NETWORK_BACKGROUND_PAINT" default="#999999"/>
        </network>
        <node>
            <dependency name="nodeCustomGraphicsSizeSync" value="true"/>
            <dependency name="nodeSizeLocked" value="true"/>
            <visualProperty name="NODE_CUSTOMGRAPHICS_POSITION_2" default="C,C,c,0.00,0.00"/>
            <visualProperty name="NODE_TRANSPARENCY" default="255"/>
            <visualProperty name="NODE_CUSTOMGRAPHICS_7" default="org.cytoscape.ding.customgraphics.NullCustomGraphics,0,[ Remove Graphics ],"/>
            <visualProperty name="NODE_CUSTOMGRAPHICS_1" default="org.cytoscape.ding.customgraphics.NullCustomGraphics,0,[ Remove Graphics ],"/>
            <visualProperty name="NODE_LABEL_POSITION" default="C,C,c,0.00,0.00"/>
            <visualProperty name="NODE_CUSTOMGRAPHICS_POSITION_3" default="C,C,c,0.00,0.00"/>
            <visualProperty name="NODE_CUSTOMGRAPHICS_POSITION_1" default="C,C,c,0.00,0.00"/>
            <visualProperty name="NODE_CUSTOMGRAPHICS_POSITION_9" default="C,C,c,0.00,0.00"/>
            <visualProperty name="NODE_CUSTOMGRAPHICS_2" default="org.cytoscape.ding.customgraphics.NullCustomGraphics,0,[ Remove Graphics ],"/>
            <visualProperty name="NODE_LABEL_FONT_SIZE" default="12"/>
            <visualProperty name="NODE_SIZE" default="30.0"/>
            <visualProperty name="NODE_TOOLTIP" default=""/>
            <visualProperty name="NODE_LABEL_WIDTH" default="100.0"/>
            <visualProperty name="NODE_CUSTOMGRAPHICS_9" default="org.cytoscape.ding.customgraphics.NullCustomGraphics,0,[ Remove Graphics ],"/>
            <visualProperty name="NODE_LABEL_FONT_FACE" default="Dialog.plain,plain,12"/>
            <visualProperty name="NODE_BORDER_TRANSPARENCY" default="255"/>
            <visualProperty name="NODE_CUSTOMGRAPHICS_POSITION_4" default="C,C,c,0.00,0.00"/>
            <visualProperty name="NODE_BORDER_WIDTH" default="0.0"/>
            <visualProperty name="NODE_SHAPE" default="RECTANGLE"/>
            <visualProperty name="NODE_CUSTOMGRAPHICS_5" default="org.cytoscape.ding.customgraphics.NullCustomGraphics,0,[ Remove Graphics ],"/>
            <visualProperty name="NODE_CUSTOMGRAPHICS_POSITION_7" default="C,C,c,0.00,0.00"/>
            <visualProperty name="NODE_LABEL" default=""/>
            <visualProperty name="NODE_LABEL_TRANSPARENCY" default="255"/>
            <visualProperty name="NODE_CUSTOMGRAPHICS_3" default="org.cytoscape.ding.customgraphics.NullCustomGraphics,0,[ Remove Graphics ],"/>
            <visualProperty name="NODE_CUSTOMGRAPHICS_POSITION_6" default="C,C,c,0.00,0.00"/>
            <visualProperty name="NODE_CUSTOMGRAPHICS_POSITION_8" default="C,C,c,0.00,0.00"/>
            <visualProperty name="NODE_NESTED_NETWORK_IMAGE_VISIBLE" default="true"/>
            <visualProperty name="NODE_FILL_COLOR" default="#FFFFFF"/>
            <visualProperty name="NODE_BORDER_STROKE" default="SOLID"/>
            <visualProperty name="NODE_WIDTH" default="70.0"/>
            <visualProperty name="NODE_HEIGHT" default="30.0"/>
            <visualProperty name="NODE_LABEL_COLOR" default="#000000"/>
            <visualProperty name="NODE_CUSTOMGRAPHICS_6" default="org.cytoscape.ding.customgraphics.NullCustomGraphics,0,[ Remove Graphics ],"/>
            <visualProperty name="NODE_SELECTED_PAINT" default="#FFFF00"/>
            <visualProperty name="NODE_CUSTOMGRAPHICS_8" default="org.cytoscape.ding.customgraphics.NullCustomGraphics,0,[ Remove Graphics ],"/>
            <visualProperty name="NODE_CUSTOMGRAPHICS_POSITION_5" default="C,C,c,0.00,0.00"/>
            <visualProperty name="NODE_BORDER_PAINT" default="#000000"/>
            <visualProperty name="NODE_CUSTOMGRAPHICS_4" default="org.cytoscape.ding.customgraphics.NullCustomGraphics,0,[ Remove Graphics ],"/>
        </node>
        <edge>
            <dependency name="arrowColorMatchesEdge" value="false"/>
            <visualProperty name="EDGE_TARGET_ARROW_UNSELECTED_PAINT" default="#000000"/>
            <visualProperty name="EDGE_LABEL_WIDTH" default="100.0"/>
            <visualProperty name="EDGE_SOURCE_ARROW_UNSELECTED_PAINT" default="#000000"/>
            <visualProperty name="EDGE_TARGET_ARROW_SHAPE" default="NONE"/>
            <visualProperty name="EDGE_STROKE_UNSELECTED_PAINT" default="#333333"/>
            <visualProperty name="EDGE_SOURCE_ARROW_SHAPE" default="NONE"/>
            <visualProperty name="EDGE_STROKE_SELECTED_PAINT" default="#FF0000"/>
            <visualProperty name="EDGE_WIDTH" default="4.0"/>
            <visualProperty name="EDGE_TOOLTIP" default=""/>
            <visualProperty name="EDGE_LABEL_FONT_FACE" default="Dialog.plain,plain,10"/>
            <visualProperty name="EDGE_LABEL_COLOR" default="#000000"/>
            <visualProperty name="EDGE_UNSELECTED_PAINT" default="#333333"/>
            <visualProperty name="EDGE_TRANSPARENCY" default="255"/>
            <visualProperty name="EDGE_LABEL" default=""/>
            <visualProperty name="EDGE_LABEL_TRANSPARENCY" default="255"/>
            <visualProperty name="EDGE_LABEL_FONT_SIZE" default="10"/>
            <visualProperty name="EDGE_LINE_TYPE" default="SOLID"/>
        </edge>
    </visualStyle>
    <visualStyle name="Universe">
        <network>
            <visualProperty name="NETWORK_BACKGROUND_PAINT" default="#000000"/>
        </network>
        <node>
            <dependency name="nodeCustomGraphicsSizeSync" value="true"/>
            <dependency name="nodeSizeLocked" value="true"/>
            <visualProperty name="NODE_CUSTOMGRAPHICS_POSITION_2" default="C,C,c,0.00,0.00"/>
            <visualProperty name="NODE_TRANSPARENCY" default="0"/>
            <visualProperty name="NODE_CUSTOMGRAPHICS_7" default="org.cytoscape.ding.customgraphics.NullCustomGraphics,0,[ Remove Graphics ],"/>
            <visualProperty name="NODE_CUSTOMGRAPHICS_1" default="org.cytoscape.ding.customgraphics.NullCustomGraphics,0,[ Remove Graphics ],"/>
            <visualProperty name="NODE_LABEL_POSITION" default="C,C,c,0.00,0.00"/>
            <visualProperty name="NODE_CUSTOMGRAPHICS_POSITION_3" default="C,C,c,0.00,0.00"/>
            <visualProperty name="NODE_CUSTOMGRAPHICS_POSITION_1" default="C,C,c,0.00,0.00"/>
            <visualProperty name="NODE_CUSTOMGRAPHICS_POSITION_9" default="C,C,c,0.00,0.00"/>
            <visualProperty name="NODE_CUSTOMGRAPHICS_2" default="org.cytoscape.ding.customgraphics.NullCustomGraphics,0,[ Remove Graphics ],"/>
            <visualProperty name="NODE_LABEL_FONT_SIZE" default="20"/>
            <visualProperty name="NODE_SIZE" default="40.0"/>
            <visualProperty name="NODE_TOOLTIP" default=""/>
            <visualProperty name="NODE_LABEL_WIDTH" default="100.0"/>
            <visualProperty name="NODE_CUSTOMGRAPHICS_9" default="org.cytoscape.ding.customgraphics.NullCustomGraphics,0,[ Remove Graphics ],"/>
            <visualProperty name="NODE_LABEL_FONT_FACE" default="Monospaced.bold,bold,12"/>
            <visualProperty name="NODE_BORDER_TRANSPARENCY" default="255"/>
            <visualProperty name="NODE_CUSTOMGRAPHICS_POSITION_4" default="C,C,c,0.00,0.00"/>
            <visualProperty name="NODE_BORDER_WIDTH" default="0.0"/>
            <visualProperty name="NODE_SHAPE" default="ELLIPSE"/>
            <visualProperty name="NODE_CUSTOMGRAPHICS_5" default="org.cytoscape.ding.customgraphics.NullCustomGraphics,0,[ Remove Graphics ],"/>
            <visualProperty name="NODE_CUSTOMGRAPHICS_POSITION_7" default="C,C,c,0.00,0.00"/>
            <visualProperty name="NODE_LABEL" default="">
                <passthroughMapping attributeType="string" attributeName="name"/>
            </visualProperty>
            <visualProperty name="NODE_LABEL_TRANSPARENCY" default="180"/>
            <visualProperty name="NODE_CUSTOMGRAPHICS_3" default="org.cytoscape.ding.customgraphics.NullCustomGraphics,0,[ Remove Graphics ],"/>
            <visualProperty name="NODE_CUSTOMGRAPHICS_POSITION_6" default="C,C,c,0.00,0.00"/>
            <visualProperty name="NODE_CUSTOMGRAPHICS_POSITION_8" default="C,C,c,0.00,0.00"/>
            <visualProperty name="NODE_NESTED_NETWORK_IMAGE_VISIBLE" default="true"/>
            <visualProperty name="NODE_FILL_COLOR" default="#000000"/>
            <visualProperty name="NODE_BORDER_STROKE" default="SOLID"/>
            <visualProperty name="NODE_WIDTH" default="100.0"/>
            <visualProperty name="NODE_HEIGHT" default="30.0"/>
            <visualProperty name="NODE_LABEL_COLOR" default="#FFFFCC"/>
            <visualProperty name="NODE_CUSTOMGRAPHICS_6" default="org.cytoscape.ding.customgraphics.NullCustomGraphics,0,[ Remove Graphics ],"/>
            <visualProperty name="NODE_SELECTED_PAINT" default="#FFFF00"/>
            <visualProperty name="NODE_CUSTOMGRAPHICS_8" default="org.cytoscape.ding.customgraphics.NullCustomGraphics,0,[ Remove Graphics ],"/>
            <visualProperty name="NODE_CUSTOMGRAPHICS_POSITION_5" default="C,C,c,0.00,0.00"/>
            <visualProperty name="NODE_BORDER_PAINT" default="#000000"/>
            <visualProperty name="NODE_CUSTOMGRAPHICS_4" default="org.cytoscape.ding.customgraphics.NullCustomGraphics,0,[ Remove Graphics ],"/>
        </node>
        <edge>
            <dependency name="arrowColorMatchesEdge" value="false"/>
            <visualProperty name="EDGE_TARGET_ARROW_UNSELECTED_PAINT" default="#000000"/>
            <visualProperty name="EDGE_LABEL_WIDTH" default="100.0"/>
            <visualProperty name="EDGE_SOURCE_ARROW_UNSELECTED_PAINT" default="#000000"/>
            <visualProperty name="EDGE_TARGET_ARROW_SHAPE" default="NONE"/>
            <visualProperty name="EDGE_STROKE_UNSELECTED_PAINT" default="#FFFFFF"/>
            <visualProperty name="EDGE_SOURCE_ARROW_SHAPE" default="NONE"/>
            <visualProperty name="EDGE_STROKE_SELECTED_PAINT" default="#FF0000"/>
            <visualProperty name="EDGE_WIDTH" default="3.0"/>
            <visualProperty name="EDGE_TOOLTIP" default=""/>
            <visualProperty name="EDGE_LABEL_FONT_FACE" default="Dialog.plain,plain,10"/>
            <visualProperty name="EDGE_LABEL_COLOR" default="#000000"/>
            <visualProperty name="EDGE_UNSELECTED_PAINT" default="#FFFFFF"/>
            <visualProperty name="EDGE_TRANSPARENCY" default="100"/>
            <visualProperty name="EDGE_LABEL" default=""/>
            <visualProperty name="EDGE_LABEL_TRANSPARENCY" default="255"/>
            <visualProperty name="EDGE_LABEL_FONT_SIZE" default="10"/>
            <visualProperty name="EDGE_LINE_TYPE" default="LONG_DASH"/>
        </edge>
    </visualStyle>
    <visualStyle name="BioPAX">
        <network/>
        <node>
            <dependency name="nodeCustomGraphicsSizeSync" value="true"/>
            <dependency name="nodeSizeLocked" value="false"/>
            <visualProperty name="NODE_SHAPE" default="ELLIPSE">
                <discreteMapping attributeType="string" attributeName="BIOPAX_TYPE">
                    <discreteMappingEntry value="ELLIPSE" attributeValue="SimplePhysicalEntity"/>
                    <discreteMappingEntry value="ELLIPSE" attributeValue="Rna"/>
                    <discreteMappingEntry value="RECTANGLE" attributeValue="GeneticInteraction"/>
                    <discreteMappingEntry value="RECTANGLE" attributeValue="BiochemicalReaction"/>
                    <discreteMappingEntry value="RECTANGLE" attributeValue="Interaction"/>
                    <discreteMappingEntry value="RECTANGLE" attributeValue="TransportWithBiochemicalReaction"/>
                    <discreteMappingEntry value="RECTANGLE" attributeValue="Conversion"/>
                    <discreteMappingEntry value="RECTANGLE" attributeValue="ComplexAssembly"/>
                    <discreteMappingEntry value="ELLIPSE" attributeValue="Protein"/>
                    <discreteMappingEntry value="DIAMOND" attributeValue="Complex"/>
                    <discreteMappingEntry value="ELLIPSE" attributeValue="RnaRegion"/>
                    <discreteMappingEntry value="RECTANGLE" attributeValue="Degradation"/>
                    <discreteMappingEntry value="TRIANGLE" attributeValue="TemplateReactionRegulation"/>
                    <discreteMappingEntry value="TRIANGLE" attributeValue="Control"/>
                    <discreteMappingEntry value="ELLIPSE" attributeValue="PhysicalEntity"/>
                    <discreteMappingEntry value="ELLIPSE" attributeValue="DnaRegion"/>
                    <discreteMappingEntry value="ELLIPSE" attributeValue="SmallMolecule"/>
                    <discreteMappingEntry value="ELLIPSE" attributeValue="Dna"/>
                    <discreteMappingEntry value="TRIANGLE" attributeValue="Modulation"/>
                    <discreteMappingEntry value="RECTANGLE" attributeValue="MolecularInteraction"/>
                    <discreteMappingEntry value="RECTANGLE" attributeValue="TemplateReaction"/>
                    <discreteMappingEntry value="TRIANGLE" attributeValue="Catalysis"/>
                    <discreteMappingEntry value="RECTANGLE" attributeValue="Transport"/>
                    <discreteMappingEntry value="ELLIPSE" attributeValue="Protein-phosphorylated"/>
                </discreteMapping>
            </visualProperty>
            <visualProperty name="NODE_LABEL">
                <passthroughMapping attributeType="string" attributeName="name"/>
            </visualProperty>
            <visualProperty name="NODE_FILL_COLOR" default="#FFFFFF">
                <discreteMapping attributeType="string" attributeName="BIOPAX_TYPE">
                    <discreteMappingEntry value="#FFFFFF" attributeValue="Complex"/>
                </discreteMapping>
            </visualProperty>
            <visualProperty name="NODE_WIDTH" default="20.0">
                <discreteMapping attributeType="string" attributeName="BIOPAX_TYPE">
                    <discreteMappingEntry value="13.4" attributeValue="GeneticInteraction"/>
                    <discreteMappingEntry value="13.4" attributeValue="BiochemicalReaction"/>
                    <discreteMappingEntry value="13.4" attributeValue="Interaction"/>
                    <discreteMappingEntry value="13.4" attributeValue="TransportWithBiochemicalReaction"/>
                    <discreteMappingEntry value="13.4" attributeValue="Conversion"/>
                    <discreteMappingEntry value="13.4" attributeValue="ComplexAssembly"/>
                    <discreteMappingEntry value="13.4" attributeValue="Complex"/>
                    <discreteMappingEntry value="13.4" attributeValue="Degradation"/>
                    <discreteMappingEntry value="13.4" attributeValue="TemplateReactionRegulation"/>
                    <discreteMappingEntry value="13.4" attributeValue="Control"/>
                    <discreteMappingEntry value="13.4" attributeValue="Modulation"/>
                    <discreteMappingEntry value="13.4" attributeValue="MolecularInteraction"/>
                    <discreteMappingEntry value="13.4" attributeValue="TemplateReaction"/>
                    <discreteMappingEntry value="13.4" attributeValue="Catalysis"/>
                    <discreteMappingEntry value="13.4" attributeValue="Transport"/>
                </discreteMapping>
            </visualProperty>
            <visualProperty name="NODE_HEIGHT" default="20.0">
                <discreteMapping attributeType="string" attributeName="BIOPAX_TYPE">
                    <discreteMappingEntry value="13.4" attributeValue="GeneticInteraction"/>
                    <discreteMappingEntry value="13.4" attributeValue="BiochemicalReaction"/>
                    <discreteMappingEntry value="13.4" attributeValue="Interaction"/>
                    <discreteMappingEntry value="13.4" attributeValue="TransportWithBiochemicalReaction"/>
                    <discreteMappingEntry value="13.4" attributeValue="Conversion"/>
                    <discreteMappingEntry value="13.4" attributeValue="ComplexAssembly"/>
                    <discreteMappingEntry value="13.4" attributeValue="Complex"/>
                    <discreteMappingEntry value="13.4" attributeValue="Degradation"/>
                    <discreteMappingEntry value="13.4" attributeValue="TemplateReactionRegulation"/>
                    <discreteMappingEntry value="13.4" attributeValue="Control"/>
                    <discreteMappingEntry value="13.4" attributeValue="Modulation"/>
                    <discreteMappingEntry value="13.4" attributeValue="MolecularInteraction"/>
                    <discreteMappingEntry value="13.4" attributeValue="TemplateReaction"/>
                    <discreteMappingEntry value="13.4" attributeValue="Catalysis"/>
                    <discreteMappingEntry value="13.4" attributeValue="Transport"/>
                </discreteMapping>
            </visualProperty>
            <visualProperty name="NODE_BORDER_PAINT" default="#006666">
                <discreteMapping attributeType="string" attributeName="BIOPAX_TYPE">
                    <discreteMappingEntry value="#006666" attributeValue="Complex"/>
                </discreteMapping>
            </visualProperty>
        </node>
        <edge>
            <dependency name="arrowColorMatchesEdge" value="true"/>
            <visualProperty name="EDGE_TARGET_ARROW_SHAPE">
                <discreteMapping attributeType="string" attributeName="interaction">
                    <discreteMappingEntry value="T" attributeValue="INHIBITION_NONCOMPETITIVE"/>
                    <discreteMappingEntry value="T" attributeValue="INHIBITION_OTHER"/>
                    <discreteMappingEntry value="DELTA" attributeValue="ACTIVATION"/>
                    <discreteMappingEntry value="T" attributeValue="INHIBITION_UNCOMPETITIVE"/>
                    <discreteMappingEntry value="DELTA" attributeValue="cofactor"/>
                    <discreteMappingEntry value="DELTA" attributeValue="ACTIVATION_ALLOSTERIC"/>
                    <discreteMappingEntry value="DELTA" attributeValue="right"/>
                    <discreteMappingEntry value="T" attributeValue="INHIBITION_ALLOSTERIC"/>
                    <discreteMappingEntry value="DELTA" attributeValue="controlled"/>
                    <discreteMappingEntry value="CIRCLE" attributeValue="contains"/>
                    <discreteMappingEntry value="T" attributeValue="INHIBITION"/>
                    <discreteMappingEntry value="T" attributeValue="INHIBITION_UNKMECH"/>
                    <discreteMappingEntry value="T" attributeValue="INHIBITION_IRREVERSIBLE"/>
                    <discreteMappingEntry value="T" attributeValue="INHIBITION_COMPETITIVE"/>
                    <discreteMappingEntry value="DELTA" attributeValue="ACTIVATION_UNKMECH"/>
                    <discreteMappingEntry value="DELTA" attributeValue="ACTIVATION_NONALLOSTERIC"/>
                </discreteMapping>
            </visualProperty>
        </edge>
    </visualStyle>
    <visualStyle name="Sample1">
        <network>
            <visualProperty name="NETWORK_BACKGROUND_PAINT" default="#FFFFFF"/>
        </network>
        <node>
            <dependency name="nodeCustomGraphicsSizeSync" value="true"/>
            <dependency name="nodeSizeLocked" value="true"/>
            <visualProperty name="NODE_CUSTOMGRAPHICS_POSITION_2" default="C,C,c,0.00,0.00"/>
            <visualProperty name="NODE_TRANSPARENCY" default="255"/>
            <visualProperty name="NODE_CUSTOMGRAPHICS_7" default="org.cytoscape.ding.customgraphics.NullCustomGraphics,0,[ Remove Graphics ],"/>
            <visualProperty name="NODE_CUSTOMGRAPHICS_1" default="org.cytoscape.ding.customgraphics.NullCustomGraphics,0,[ Remove Graphics ],"/>
            <visualProperty name="NODE_LABEL_POSITION" default="C,C,c,0.00,0.00"/>
            <visualProperty name="NODE_CUSTOMGRAPHICS_POSITION_3" default="C,C,c,0.00,0.00"/>
            <visualProperty name="NODE_CUSTOMGRAPHICS_POSITION_1" default="C,C,c,0.00,0.00"/>
            <visualProperty name="NODE_CUSTOMGRAPHICS_POSITION_9" default="C,C,c,0.00,0.00"/>
            <visualProperty name="NODE_CUSTOMGRAPHICS_2" default="org.cytoscape.ding.customgraphics.NullCustomGraphics,0,[ Remove Graphics ],"/>
            <visualProperty name="NODE_LABEL_FONT_SIZE" default="12"/>
            <visualProperty name="NODE_SIZE" default="40.0"/>
            <visualProperty name="NODE_TOOLTIP" default=""/>
            <visualProperty name="NODE_LABEL_WIDTH" default="100.0"/>
            <visualProperty name="NODE_CUSTOMGRAPHICS_9" default="org.cytoscape.ding.customgraphics.NullCustomGraphics,0,[ Remove Graphics ],"/>
            <visualProperty name="NODE_LABEL_FONT_FACE" default="Dialog.bold,bold,12"/>
            <visualProperty name="NODE_BORDER_TRANSPARENCY" default="255"/>
            <visualProperty name="NODE_CUSTOMGRAPHICS_POSITION_4" default="C,C,c,0.00,0.00"/>
            <visualProperty name="NODE_BORDER_WIDTH" default="0.0"/>
            <visualProperty name="NODE_SHAPE" default="ELLIPSE"/>
            <visualProperty name="NODE_CUSTOMGRAPHICS_5" default="org.cytoscape.ding.customgraphics.NullCustomGraphics,0,[ Remove Graphics ],"/>
            <visualProperty name="NODE_CUSTOMGRAPHICS_POSITION_7" default="C,C,c,0.00,0.00"/>
            <visualProperty name="NODE_LABEL" default="">
                <passthroughMapping attributeType="string" attributeName="name"/>
            </visualProperty>
            <visualProperty name="NODE_LABEL_TRANSPARENCY" default="255"/>
            <visualProperty name="NODE_CUSTOMGRAPHICS_3" default="org.cytoscape.ding.customgraphics.NullCustomGraphics,0,[ Remove Graphics ],"/>
            <visualProperty name="NODE_CUSTOMGRAPHICS_POSITION_6" default="C,C,c,0.00,0.00"/>
            <visualProperty name="NODE_CUSTOMGRAPHICS_POSITION_8" default="C,C,c,0.00,0.00"/>
            <visualProperty name="NODE_NESTED_NETWORK_IMAGE_VISIBLE" default="true"/>
            <visualProperty name="NODE_FILL_COLOR" default="#CCCCFF"/>
            <visualProperty name="NODE_BORDER_STROKE" default="SOLID"/>
            <visualProperty name="NODE_WIDTH" default="70.0"/>
            <visualProperty name="NODE_HEIGHT" default="30.0"/>
            <visualProperty name="NODE_LABEL_COLOR" default="#000000"/>
            <visualProperty name="NODE_CUSTOMGRAPHICS_6" default="org.cytoscape.ding.customgraphics.NullCustomGraphics,0,[ Remove Graphics ],"/>
            <visualProperty name="NODE_SELECTED_PAINT" default="#FFFF00"/>
            <visualProperty name="NODE_CUSTOMGRAPHICS_8" default="org.cytoscape.ding.customgraphics.NullCustomGraphics,0,[ Remove Graphics ],"/>
            <visualProperty name="NODE_CUSTOMGRAPHICS_POSITION_5" default="C,C,c,0.00,0.00"/>
            <visualProperty name="NODE_BORDER_PAINT" default="#000000"/>
            <visualProperty name="NODE_CUSTOMGRAPHICS_4" default="org.cytoscape.ding.customgraphics.NullCustomGraphics,0,[ Remove Graphics ],"/>
        </node>
        <edge>
            <dependency name="arrowColorMatchesEdge" value="false"/>
            <visualProperty name="EDGE_TARGET_ARROW_UNSELECTED_PAINT" default="#000000"/>
            <visualProperty name="EDGE_LABEL_WIDTH" default="100.0"/>
            <visualProperty name="EDGE_SOURCE_ARROW_UNSELECTED_PAINT" default="#000000"/>
            <visualProperty name="EDGE_TARGET_ARROW_SHAPE" default="NONE"/>
            <visualProperty name="EDGE_STROKE_UNSELECTED_PAINT" default="#000000">
                <discreteMapping attributeType="string" attributeName="interaction">
                    <discreteMappingEntry value="#00CC00" attributeValue="pp"/>
                    <discreteMappingEntry value="#FF0033" attributeValue="pd"/>
                </discreteMapping>
            </visualProperty>
            <visualProperty name="EDGE_SOURCE_ARROW_SHAPE" default="NONE"/>
            <visualProperty name="EDGE_STROKE_SELECTED_PAINT" default="#FF0000"/>
            <visualProperty name="EDGE_WIDTH" default="1.0"/>
            <visualProperty name="EDGE_TOOLTIP" default=""/>
            <visualProperty name="EDGE_LABEL_FONT_FACE" default="Dialog.plain,plain,10"/>
            <visualProperty name="EDGE_LABEL_COLOR" default="#000000"/>
            <visualProperty name="EDGE_UNSELECTED_PAINT" default="#000000">
                <discreteMapping attributeType="string" attributeName="interaction">
                    <discreteMappingEntry value="#00CC00" attributeValue="pp"/>
                    <discreteMappingEntry value="#FF0033" attributeValue="pd"/>
                </discreteMapping>
            </visualProperty>
            <visualProperty name="EDGE_TRANSPARENCY" default="255"/>
            <visualProperty name="EDGE_LABEL" default="">
                <passthroughMapping attributeType="string" attributeName="interaction"/>
            </visualProperty>
            <visualProperty name="EDGE_LABEL_TRANSPARENCY" default="255"/>
            <visualProperty name="EDGE_LABEL_FONT_SIZE" default="10"/>
            <visualProperty name="EDGE_LINE_TYPE" default="SOLID">
                <discreteMapping attributeType="string" attributeName="interaction">
                    <discreteMappingEntry value="SOLID" attributeValue="pp"/>
                    <discreteMappingEntry value="LONG_DASH" attributeValue="pd"/>
                </discreteMapping>
            </visualProperty>
        </edge>
    </visualStyle>
    <visualStyle name="default">
        <network>
            <visualProperty name="NETWORK_BACKGROUND_PAINT" default="#CCCCFF"/>
        </network>
        <node>
            <dependency name="nodeCustomGraphicsSizeSync" value="true"/>
            <dependency name="nodeSizeLocked" value="true"/>
            <visualProperty name="NODE_CUSTOMGRAPHICS_POSITION_2" default="C,C,c,0.00,0.00"/>
            <visualProperty name="NODE_TRANSPARENCY" default="255"/>
            <visualProperty name="NODE_CUSTOMGRAPHICS_7" default="org.cytoscape.ding.customgraphics.NullCustomGraphics,0,[ Remove Graphics ],"/>
            <visualProperty name="NODE_CUSTOMGRAPHICS_1" default="org.cytoscape.ding.customgraphics.NullCustomGraphics,0,[ Remove Graphics ],"/>
            <visualProperty name="NODE_LABEL_POSITION" default="C,C,c,0.00,0.00"/>
            <visualProperty name="NODE_CUSTOMGRAPHICS_POSITION_3" default="C,C,c,0.00,0.00"/>
            <visualProperty name="NODE_CUSTOMGRAPHICS_POSITION_1" default="C,C,c,0.00,0.00"/>
            <visualProperty name="NODE_CUSTOMGRAPHICS_POSITION_9" default="C,C,c,0.00,0.00"/>
            <visualProperty name="NODE_CUSTOMGRAPHICS_2" default="org.cytoscape.ding.customgraphics.NullCustomGraphics,0,[ Remove Graphics ],"/>
            <visualProperty name="NODE_LABEL_FONT_SIZE" default="12"/>
            <visualProperty name="NODE_SIZE" default="40.0"/>
            <visualProperty name="NODE_TOOLTIP" default=""/>
            <visualProperty name="NODE_LABEL_WIDTH" default="100.0"/>
            <visualProperty name="NODE_CUSTOMGRAPHICS_9" default="org.cytoscape.ding.customgraphics.NullCustomGraphics,0,[ Remove Graphics ],"/>
            <visualProperty name="NODE_LABEL_FONT_FACE" default="SansSerif.bold,bold,12"/>
            <visualProperty name="NODE_BORDER_TRANSPARENCY" default="255"/>
            <visualProperty name="NODE_CUSTOMGRAPHICS_POSITION_4" default="C,C,c,0.00,0.00"/>
            <visualProperty name="NODE_BORDER_WIDTH" default="1.5"/>
            <visualProperty name="NODE_SHAPE" default="ELLIPSE"/>
            <visualProperty name="NODE_CUSTOMGRAPHICS_5" default="org.cytoscape.ding.customgraphics.NullCustomGraphics,0,[ Remove Graphics ],"/>
            <visualProperty name="NODE_CUSTOMGRAPHICS_POSITION_7" default="C,C,c,0.00,0.00"/>
            <visualProperty name="NODE_LABEL" default="">
                <passthroughMapping attributeType="string" attributeName="name"/>
            </visualProperty>
            <visualProperty name="NODE_LABEL_TRANSPARENCY" default="255"/>
            <visualProperty name="NODE_CUSTOMGRAPHICS_3" default="org.cytoscape.ding.customgraphics.NullCustomGraphics,0,[ Remove Graphics ],"/>
            <visualProperty name="NODE_CUSTOMGRAPHICS_POSITION_6" default="C,C,c,0.00,0.00"/>
            <visualProperty name="NODE_CUSTOMGRAPHICS_POSITION_8" default="C,C,c,0.00,0.00"/>
            <visualProperty name="NODE_NESTED_NETWORK_IMAGE_VISIBLE" default="true"/>
            <visualProperty name="NODE_FILL_COLOR" default="#FF9999"/>
            <visualProperty name="NODE_BORDER_STROKE" default="SOLID"/>
            <visualProperty name="NODE_WIDTH" default="70.0"/>
            <visualProperty name="NODE_HEIGHT" default="30.0"/>
            <visualProperty name="NODE_LABEL_COLOR" default="#000000"/>
            <visualProperty name="NODE_CUSTOMGRAPHICS_6" default="org.cytoscape.ding.customgraphics.NullCustomGraphics,0,[ Remove Graphics ],"/>
            <visualProperty name="NODE_SELECTED_PAINT" default="#FFFF00"/>
            <visualProperty name="NODE_CUSTOMGRAPHICS_8" default="org.cytoscape.ding.customgraphics.NullCustomGraphics,0,[ Remove Graphics ],"/>
            <visualProperty name="NODE_CUSTOMGRAPHICS_POSITION_5" default="C,C,c,0.00,0.00"/>
            <visualProperty name="NODE_BORDER_PAINT" default="#666666"/>
            <visualProperty name="NODE_CUSTOMGRAPHICS_4" default="org.cytoscape.ding.customgraphics.NullCustomGraphics,0,[ Remove Graphics ],"/>
        </node>
        <edge>
            <dependency name="arrowColorMatchesEdge" value="false"/>
            <visualProperty name="EDGE_TARGET_ARROW_UNSELECTED_PAINT" default="#000000"/>
            <visualProperty name="EDGE_LABEL_WIDTH" default="100.0"/>
            <visualProperty name="EDGE_SOURCE_ARROW_UNSELECTED_PAINT" default="#000000"/>
            <visualProperty name="EDGE_TARGET_ARROW_SHAPE" default="NONE"/>
            <visualProperty name="EDGE_STROKE_UNSELECTED_PAINT" default="#0000FF"/>
            <visualProperty name="EDGE_SOURCE_ARROW_SHAPE" default="NONE"/>
            <visualProperty name="EDGE_STROKE_SELECTED_PAINT" default="#FF0000"/>
            <visualProperty name="EDGE_WIDTH" default="1.5"/>
            <visualProperty name="EDGE_TOOLTIP" default=""/>
            <visualProperty name="EDGE_LABEL_FONT_FACE" default="Dialog.plain,plain,10"/>
            <visualProperty name="EDGE_LABEL_COLOR" default="#000000"/>
            <visualProperty name="EDGE_UNSELECTED_PAINT" default="#0000FF"/>
            <visualProperty name="EDGE_TRANSPARENCY" default="255"/>
            <visualProperty name="EDGE_LABEL" default=""/>
            <visualProperty name="EDGE_LABEL_TRANSPARENCY" default="255"/>
            <visualProperty name="EDGE_LABEL_FONT_SIZE" default="10"/>
            <visualProperty name="EDGE_LINE_TYPE" default="SOLID"/>
        </edge>
    </visualStyle>
    <visualStyle name="Solid">
        <network>
            <visualProperty name="NETWORK_BACKGROUND_PAINT" default="#FFFFFF"/>
            <visualProperty name="NETWORK_WIDTH" default="550.0"/>
            <visualProperty name="NETWORK_HEIGHT" default="400.0"/>
            <visualProperty name="NETWORK_DEPTH" default="0.0"/>
            <visualProperty name="NETWORK_EDGE_SELECTION" default="true"/>
            <visualProperty name="NETWORK_TITLE" default=""/>
            <visualProperty name="NETWORK_NODE_SELECTION" default="true"/>
            <visualProperty name="NETWORK_SCALE_FACTOR" default="1.0"/>
            <visualProperty name="NETWORK_CENTER_X_LOCATION" default="0.0"/>
            <visualProperty name="NETWORK_CENTER_Z_LOCATION" default="0.0"/>
            <visualProperty name="NETWORK_CENTER_Y_LOCATION" default="0.0"/>
        </network>
        <node>
            <dependency name="nodeCustomGraphicsSizeSync" value="true"/>
            <dependency name="nodeSizeLocked" value="true"/>
            <visualProperty name="COMPOUND_NODE_PADDING" default="10.0"/>
            <visualProperty name="NODE_CUSTOMGRAPHICS_POSITION_2" default="C,C,c,0.00,0.00"/>
            <visualProperty name="NODE_TRANSPARENCY" default="255"/>
            <visualProperty name="NODE_CUSTOMGRAPHICS_7" default="org.cytoscape.ding.customgraphics.NullCustomGraphics,0,[ Remove Graphics ],"/>
            <visualProperty name="NODE_CUSTOMGRAPHICS_1" default="org.cytoscape.ding.customgraphics.NullCustomGraphics,0,[ Remove Graphics ],"/>
            <visualProperty name="NODE_LABEL_POSITION" default="S,NW,c,0.00,5.00"/>
            <visualProperty name="NODE_CUSTOMGRAPHICS_SIZE_8" default="0.0"/>
            <visualProperty name="NODE_CUSTOMGRAPHICS_POSITION_3" default="C,C,c,0.00,0.00"/>
            <visualProperty name="NODE_CUSTOMGRAPHICS_POSITION_1" default="C,C,c,0.00,0.00"/>
            <visualProperty name="NODE_CUSTOMGRAPHICS_POSITION_9" default="C,C,c,0.00,0.00"/>
            <visualProperty name="NODE_CUSTOMGRAPHICS_2" default="org.cytoscape.ding.customgraphics.NullCustomGraphics,0,[ Remove Graphics ],"/>
            <visualProperty name="NODE_LABEL_FONT_SIZE" default="18"/>
            <visualProperty name="NODE_CUSTOMGRAPHICS_SIZE_2" default="0.0"/>
            <visualProperty name="NODE_SIZE" default="40.0"/>
            <visualProperty name="NODE_TOOLTIP" default=""/>
            <visualProperty name="NODE_CUSTOMGRAPHICS_SIZE_7" default="0.0"/>
            <visualProperty name="NODE_LABEL_WIDTH" default="100.0"/>
            <visualProperty name="NODE_CUSTOMGRAPHICS_9" default="org.cytoscape.ding.customgraphics.NullCustomGraphics,0,[ Remove Graphics ],"/>
            <visualProperty name="NODE_CUSTOMGRAPHICS_SIZE_4" default="0.0"/>
            <visualProperty name="NODE_CUSTOMGRAPHICS_SIZE_1" default="0.0"/>
            <visualProperty name="NODE_LABEL_FONT_FACE" default="Dialog.plain,plain,12"/>
            <visualProperty name="NODE_BORDER_TRANSPARENCY" default="255"/>
            <visualProperty name="NODE_CUSTOMGRAPHICS_POSITION_4" default="C,C,c,0.00,0.00"/>
            <visualProperty name="NODE_BORDER_WIDTH" default="3.0"/>
            <visualProperty name="NODE_SHAPE" default="ELLIPSE"/>
            <visualProperty name="COMPOUND_NODE_SHAPE" default="ROUND_RECTANGLE"/>
            <visualProperty name="NODE_X_LOCATION" default="0.0"/>
            <visualProperty name="NODE_SELECTED" default="false"/>
            <visualProperty name="NODE_Z_LOCATION" default="0.0"/>
            <visualProperty name="NODE_CUSTOMGRAPHICS_5" default="org.cytoscape.ding.customgraphics.NullCustomGraphics,0,[ Remove Graphics ],"/>
            <visualProperty name="NODE_DEPTH" default="0.0"/>
            <visualProperty name="NODE_CUSTOMGRAPHICS_POSITION_7" default="C,C,c,0.00,0.00"/>
            <visualProperty name="NODE_LABEL" default=""/>
            <visualProperty name="NODE_LABEL_TRANSPARENCY" default="160"/>
            <visualProperty name="NODE_CUSTOMGRAPHICS_3" default="org.cytoscape.ding.customgraphics.NullCustomGraphics,0,[ Remove Graphics ],"/>
            <visualProperty name="NODE_CUSTOMGRAPHICS_POSITION_6" default="C,C,c,0.00,0.00"/>
            <visualProperty name="NODE_CUSTOMGRAPHICS_POSITION_8" default="C,C,c,0.00,0.00"/>
            <visualProperty name="NODE_CUSTOMGRAPHICS_SIZE_9" default="0.0"/>
            <visualProperty name="NODE_NESTED_NETWORK_IMAGE_VISIBLE" default="true"/>
            <visualProperty name="NODE_Y_LOCATION" default="0.0"/>
            <visualProperty name="NODE_FILL_COLOR" default="#666666">
                <discreteMapping attributeType="string" attributeName="hdesc">
                    <discreteMappingEntry value="#FF0033" attributeValue="thiovirid_RiPP: thioviridamide family RiPP peptid"/>
                    <discreteMappingEntry value="#0000FF" attributeValue="lasso_leader_L3: lasso RiPP family leader peptide"/>
                    <discreteMappingEntry value="#0000FF" attributeValue="lasso_albusnod: albusnodin family lasso peptide"/>
                    <discreteMappingEntry value="#006666" attributeValue="plantaricin: plantaricin C family lantibiotic"/>
                    <discreteMappingEntry value="#006666" attributeValue="Nitrile hydratase beta subunit"/>
                    <discreteMappingEntry value="#996600" attributeValue="thiazolyl_GetA: GE37468 family thiazolyl peptide"/>
                    <discreteMappingEntry value="#996600" attributeValue="thiazolyl_B: thiazolylpeptide-type bacteriocin"/>
                    <discreteMappingEntry value="#9933FF" attributeValue="RiPP_thiocil: thiocillin family RiPP"/>
                    <discreteMappingEntry value="#FFFF00" attributeValue="ThiS family"/>
                    <discreteMappingEntry value="#006666" attributeValue="Nitrile hydratase, alpha chain"/>
                    <discreteMappingEntry value="#9933FF" attributeValue="thiazolyl_BerA: thiocillin/thiostrepton family th"/>
                    <discreteMappingEntry value="#33CC00" attributeValue="bottro_RiPP: bottromycin family RiPP peptide"/>
                </discreteMapping>
            </visualProperty>
            <visualProperty name="NODE_BORDER_STROKE" default="SOLID"/>
            <visualProperty name="NODE_WIDTH" default="70.0"/>
            <visualProperty name="NODE_VISIBLE" default="true"/>
            <visualProperty name="NODE_CUSTOMGRAPHICS_SIZE_3" default="0.0"/>
            <visualProperty name="NODE_HEIGHT" default="30.0"/>
            <visualProperty name="NODE_CUSTOMGRAPHICS_SIZE_5" default="0.0"/>
            <visualProperty name="NODE_CUSTOMGRAPHICS_SIZE_6" default="0.0"/>
            <visualProperty name="NODE_LABEL_COLOR" default="#000000"/>
            <visualProperty name="NODE_CUSTOMGRAPHICS_6" default="org.cytoscape.ding.customgraphics.NullCustomGraphics,0,[ Remove Graphics ],"/>
            <visualProperty name="NODE_SELECTED_PAINT" default="#FFFF00"/>
            <visualProperty name="NODE_CUSTOMGRAPHICS_8" default="org.cytoscape.ding.customgraphics.NullCustomGraphics,0,[ Remove Graphics ],"/>
            <visualProperty name="NODE_CUSTOMGRAPHICS_POSITION_5" default="C,C,c,0.00,0.00"/>
            <visualProperty name="NODE_BORDER_PAINT" default="#000000"/>
            <visualProperty name="NODE_CUSTOMGRAPHICS_4" default="org.cytoscape.ding.customgraphics.NullCustomGraphics,0,[ Remove Graphics ],"/>
        </node>
        <edge>
            <dependency name="arrowColorMatchesEdge" value="false"/>
            <visualProperty name="EDGE_TARGET_ARROW_UNSELECTED_PAINT" default="#000000"/>
            <visualProperty name="EDGE_LABEL_WIDTH" default="100.0"/>
            <visualProperty name="EDGE_SOURCE_ARROW_UNSELECTED_PAINT" default="#000000"/>
            <visualProperty name="EDGE_TARGET_ARROW_SHAPE" default="NONE"/>
            <visualProperty name="EDGE_STROKE_UNSELECTED_PAINT" default="#CCCCCC"/>
            <visualProperty name="EDGE_SOURCE_ARROW_SHAPE" default="NONE"/>
            <visualProperty name="EDGE_STROKE_SELECTED_PAINT" default="#FF0000"/>
            <visualProperty name="EDGE_WIDTH" default="5.0"/>
            <visualProperty name="EDGE_TOOLTIP" default=""/>
            <visualProperty name="EDGE_TARGET_ARROW_SELECTED_PAINT" default="#FFFF00"/>
            <visualProperty name="EDGE_LABEL_FONT_FACE" default="Dialog.plain,plain,10"/>
            <visualProperty name="EDGE_SOURCE_ARROW_SELECTED_PAINT" default="#FFFF00"/>
            <visualProperty name="EDGE_BEND"/>
            <visualProperty name="EDGE_LABEL_COLOR" default="#666666"/>
            <visualProperty name="EDGE_UNSELECTED_PAINT" default="#CCCCCC"/>
            <visualProperty name="EDGE_SELECTED" default="false"/>
            <visualProperty name="EDGE_TRANSPARENCY" default="255"/>
            <visualProperty name="EDGE_LABEL" default=""/>
            <visualProperty name="EDGE_LABEL_TRANSPARENCY" default="190"/>
            <visualProperty name="EDGE_CURVED" default="true"/>
            <visualProperty name="EDGE_VISIBLE" default="true"/>
            <visualProperty name="EDGE_LABEL_FONT_SIZE" default="10"/>
            <visualProperty name="EDGE_LINE_TYPE" default="SOLID"/>
        </edge>
    </visualStyle>
    <visualStyle name="Nested Network Style">
        <network>
            <visualProperty name="NETWORK_BACKGROUND_PAINT" default="#FFFFFF"/>
        </network>
        <node>
            <dependency name="nodeCustomGraphicsSizeSync" value="true"/>
            <dependency name="nodeSizeLocked" value="true"/>
            <visualProperty name="NODE_CUSTOMGRAPHICS_POSITION_2" default="C,C,c,0.00,0.00"/>
            <visualProperty name="NODE_TRANSPARENCY" default="150"/>
            <visualProperty name="NODE_CUSTOMGRAPHICS_7" default="org.cytoscape.ding.customgraphics.NullCustomGraphics,0,[ Remove Graphics ],"/>
            <visualProperty name="NODE_CUSTOMGRAPHICS_1" default="org.cytoscape.ding.customgraphics.NullCustomGraphics,0,[ Remove Graphics ],"/>
            <visualProperty name="NODE_LABEL_POSITION" default="C,C,c,0.00,0.00">
                <discreteMapping attributeType="boolean" attributeName="has_nested_network">
                    <discreteMappingEntry value="SE,NW,c,0.00,0.00" attributeValue="true"/>
                </discreteMapping>
            </visualProperty>
            <visualProperty name="NODE_CUSTOMGRAPHICS_POSITION_3" default="C,C,c,0.00,0.00"/>
            <visualProperty name="NODE_CUSTOMGRAPHICS_POSITION_1" default="C,C,c,0.00,0.00"/>
            <visualProperty name="NODE_CUSTOMGRAPHICS_POSITION_9" default="C,C,c,0.00,0.00"/>
            <visualProperty name="NODE_CUSTOMGRAPHICS_2" default="org.cytoscape.ding.customgraphics.NullCustomGraphics,0,[ Remove Graphics ],"/>
            <visualProperty name="NODE_LABEL_FONT_SIZE" default="13"/>
            <visualProperty name="NODE_SIZE" default="40.0">
                <discreteMapping attributeType="boolean" attributeName="has_nested_network">
                    <discreteMappingEntry value="60.0" attributeValue="true"/>
                </discreteMapping>
            </visualProperty>
            <visualProperty name="NODE_TOOLTIP" default=""/>
            <visualProperty name="NODE_LABEL_WIDTH" default="100.0"/>
            <visualProperty name="NODE_CUSTOMGRAPHICS_9" default="org.cytoscape.ding.customgraphics.NullCustomGraphics,0,[ Remove Graphics ],"/>
            <visualProperty name="NODE_LABEL_FONT_FACE" default="SansSerif.plain,plain,12"/>
            <visualProperty name="NODE_BORDER_TRANSPARENCY" default="190"/>
            <visualProperty name="NODE_CUSTOMGRAPHICS_POSITION_4" default="C,C,c,0.00,0.00"/>
            <visualProperty name="NODE_BORDER_WIDTH" default="2.0">
                <discreteMapping attributeType="boolean" attributeName="has_nested_network">
                    <discreteMappingEntry value="5.0" attributeValue="true"/>
                </discreteMapping>
            </visualProperty>
            <visualProperty name="NODE_SHAPE" default="ELLIPSE">
                <discreteMapping attributeType="boolean" attributeName="has_nested_network">
                    <discreteMappingEntry value="RECTANGLE" attributeValue="true"/>
                </discreteMapping>
            </visualProperty>
            <visualProperty name="NODE_CUSTOMGRAPHICS_5" default="org.cytoscape.ding.customgraphics.NullCustomGraphics,0,[ Remove Graphics ],"/>
            <visualProperty name="NODE_CUSTOMGRAPHICS_POSITION_7" default="C,C,c,0.00,0.00"/>
            <visualProperty name="NODE_LABEL" default="">
                <passthroughMapping attributeType="string" attributeName="name"/>
            </visualProperty>
            <visualProperty name="NODE_LABEL_TRANSPARENCY" default="255"/>
            <visualProperty name="NODE_CUSTOMGRAPHICS_3" default="org.cytoscape.ding.customgraphics.NullCustomGraphics,0,[ Remove Graphics ],"/>
            <visualProperty name="NODE_CUSTOMGRAPHICS_POSITION_6" default="C,C,c,0.00,0.00"/>
            <visualProperty name="NODE_CUSTOMGRAPHICS_POSITION_8" default="C,C,c,0.00,0.00"/>
            <visualProperty name="NODE_NESTED_NETWORK_IMAGE_VISIBLE" default="true"/>
            <visualProperty name="NODE_FILL_COLOR" default="#99FF99">
                <discreteMapping attributeType="boolean" attributeName="has_nested_network">
                    <discreteMappingEntry value="#FFFFFF" attributeValue="true"/>
                </discreteMapping>
            </visualProperty>
            <visualProperty name="NODE_BORDER_STROKE" default="SOLID"/>
            <visualProperty name="NODE_WIDTH" default="70.0"/>
            <visualProperty name="NODE_HEIGHT" default="30.0"/>
            <visualProperty name="NODE_LABEL_COLOR" default="#000000">
                <discreteMapping attributeType="boolean" attributeName="has_nested_network">
                    <discreteMappingEntry value="#0066CC" attributeValue="true"/>
                </discreteMapping>
            </visualProperty>
            <visualProperty name="NODE_CUSTOMGRAPHICS_6" default="org.cytoscape.ding.customgraphics.NullCustomGraphics,0,[ Remove Graphics ],"/>
            <visualProperty name="NODE_SELECTED_PAINT" default="#FFFF00"/>
            <visualProperty name="NODE_CUSTOMGRAPHICS_8" default="org.cytoscape.ding.customgraphics.NullCustomGraphics,0,[ Remove Graphics ],"/>
            <visualProperty name="NODE_CUSTOMGRAPHICS_POSITION_5" default="C,C,c,0.00,0.00"/>
            <visualProperty name="NODE_BORDER_PAINT" default="#009900">
                <discreteMapping attributeType="boolean" attributeName="has_nested_network">
                    <discreteMappingEntry value="#0066CC" attributeValue="true"/>
                </discreteMapping>
            </visualProperty>
            <visualProperty name="NODE_CUSTOMGRAPHICS_4" default="org.cytoscape.ding.customgraphics.NullCustomGraphics,0,[ Remove Graphics ],"/>
        </node>
        <edge>
            <dependency name="arrowColorMatchesEdge" value="false"/>
            <visualProperty name="EDGE_TARGET_ARROW_UNSELECTED_PAINT" default="#000000"/>
            <visualProperty name="EDGE_LABEL_WIDTH" default="100.0"/>
            <visualProperty name="EDGE_SOURCE_ARROW_UNSELECTED_PAINT" default="#000000"/>
            <visualProperty name="EDGE_TARGET_ARROW_SHAPE" default="NONE"/>
            <visualProperty name="EDGE_STROKE_UNSELECTED_PAINT" default="#333333"/>
            <visualProperty name="EDGE_SOURCE_ARROW_SHAPE" default="NONE"/>
            <visualProperty name="EDGE_STROKE_SELECTED_PAINT" default="#FF0000"/>
            <visualProperty name="EDGE_WIDTH" default="2.0"/>
            <visualProperty name="EDGE_TOOLTIP" default=""/>
            <visualProperty name="EDGE_LABEL_FONT_FACE" default="Dialog.plain,plain,10"/>
            <visualProperty name="EDGE_LABEL_COLOR" default="#000000"/>
            <visualProperty name="EDGE_UNSELECTED_PAINT" default="#333333"/>
            <visualProperty name="EDGE_TRANSPARENCY" default="255"/>
            <visualProperty name="EDGE_LABEL" default=""/>
            <visualProperty name="EDGE_LABEL_TRANSPARENCY" default="255"/>
            <visualProperty name="EDGE_LABEL_FONT_SIZE" default="10"/>
            <visualProperty name="EDGE_LINE_TYPE" default="SOLID"/>
        </edge>
    </visualStyle>
</vizmap>
