# Supplementary material for: Discovery and characterisation of an amidine-containing ribosomally-synthesised peptide that is widely distributed in nature
Source: Royal Society of Chemistry journal article supplement (doi:10.1039/d1sc01456k), 2021-01-01
Supplement: d1sc01456k2.cys [file d1sc01456k2.cys › CytoscapeSession-2019_12_19-13_30/tables/36-cc_1.to.494.txt/LOCAL_ATTRS-org.cytoscape.model.CyNode-36+default+node.cytable]

CyCSV-Version	1
SUID	name	selected
java.lang.Long	java.lang.String	java.lang.Boolean
36 default node
62	WP_133246044_2	false
63	PWF27333_2	false
64	WP_066215709_2	false
65	SEC29390_2	false
66	PDQ36093_4	false
67	PDQ36095_3	false
68	WP_105032337_3	false
69	WP_104181080_3	false
70	WP_107778338_3	false
71	WP_107778339_3	false
72	AGL26862_1	false
73	COV81994_2	false
74	WP_083091741_1	false
75	WP_090039557_6	false
76	WP_017177815_2	false
77	WP_073452776_1	false
78	REH37226_1	false
79	WP_084580442_1	false
80	WP_131735418_1	false
81	WP_103341360_1	false
82	WP_131785729_4	false
83	WP_131785730_4	false
84	WP_123601960_4	false
85	WP_123601959_4	false
86	WP_121183327_1	false
87	WP_053619387_1	false
88	WP_095563712_2	false
89	WP_095563712_3	false
90	WP_073785992_3	false
91	OKH95170_3	false
92	WP_126382827_4	false
93	WP_126382826_3	false
94	OKI12399_2	false
95	WP_083609312_2	false
96	WP_100045344_3	false
97	WP_121405200_3	false
98	AXK36690_3	false
99	AXK36692_2	false
100	WP_116026137_1	false
101	WP_116026136_1	false
102	PKV33869_5	false
103	WP_111334328_1	false
104	WP_083113299_2	false
105	WP_085670625_1	false
106	WP_081384789_3	false
107	WP_075410821_2	false
108	WP_035849418_4	false
109	WP_035849420_7	false
110	WP_116154877_3	false
111	RED74809_3	false
112	WP_018962008_8	false
113	WP_018962008_5	false
114	WP_061921822_1	false
115	WP_065164254_4	false
116	RSM56874_1	false
117	WP_125807935_1	false
118	WP_111862862_1	false
119	WP_111862863_1	false
120	WP_086858376_3	false
121	WP_086858376_4	false
122	WP_060180042_2	false
123	WP_076045700_1	false
124	ERK54887_1	false
125	WP_081707409_1	false
126	WP_104263679_3	false
127	WP_097165202_2	false
128	EJJ05688_1	false
129	WP_040899039_1	false
130	SGI74060_3	false
131	WP_079180155_3	false
132	KJK44488_2	false
133	WP_082115066_2	false
134	WP_053729792_4	false
135	WP_053729790_4	false
136	OJV24806_2	false
137	OJV24808_1	false
138	RED74809_2	false
139	WP_116154877_2	false
140	SFB39971_2	false
141	WP_091674323_2	false
142	WP_045196822_3	false
143	KZE98020_3	false
144	WP_067908345_2	false
145	AFJ68075_2	false
146	EWC60518_2	false
147	WP_054046275_1	false
148	WP_116110588_2	false
149	WP_094002561_2	false
150	GAQ65395_1	false
151	WP_059082757_1	false
152	WP_091371144_1	false
153	WP_054049769_2	false
154	WP_053729790_3	false
155	WP_053729792_3	false
156	ONI75210_1	false
157	WP_083753877_1	false
158	WP_042407643_3	false
159	WP_042407643_4	false
160	WP_027737668_1	false
161	WP_027737671_1	false
162	WP_086461444_2	false
163	WP_086461443_2	false
164	WP_083982727_2	false
165	WP_080564860_3	false
166	WP_054213495_2	false
167	KPI20077_2	false
168	WP_018637157_1	false
169	WP_054569301_1	false
170	WP_064110435_3	false
171	WP_090039557_3	false
172	EPJ34556_2	false
173	WP_082320087_1	false
174	KJK44488_1	false
175	WP_082115066_1	false
176	WP_089507734_1	false
177	OXL32905_1	false
178	KTR94659_1	false
179	WP_081323045_1	false
180	WP_078561279_1	false
181	EFL12569_1	false
182	WP_028567914_2	false
183	SFD04819_1	false
184	SDE31545_3	false
185	WP_097276114_3	false
186	WP_124913393_2	false
187	OKL50794_1	false
188	SBT66104_1	false
189	WP_098744376_1	false
190	WP_004017479_2	false
191	EEZ91469_3	false
192	WP_066216109_1	false
193	WP_107004474_2	false
194	WP_086513414_2	false
195	WP_086513413_2	false
196	WP_033342998_1	false
197	WP_123603612_3	false
198	WP_045877303_3	false
199	WP_084011357_3	false
200	WP_131736173_1	false
201	WP_051751858_2	false
202	WP_092779820_3	false
203	WP_121394015_3	false
204	WP_123971014_1	false
205	RPF24868_1	false
206	KKF03247_1	false
207	WP_064282747_1	false
208	WP_073387576_3	false
209	WP_081907113_2	false
210	WP_035861760_3	false
211	EXG81129_3	false
212	OKH95170_1	false
213	WP_073785992_1	false
214	SBN62121_1	false
215	WP_111209344_2	false
216	CAM04239_1	false
217	WP_009951067_1	false
218	WP_090014707_1	false
219	SDN00667_1	false
220	WP_101557149_2	false
221	WP_101557151_2	false
222	WP_082163142_2	false
223	EFF80328_2	false
224	AKJ11412_3	false
225	AKJ11407_3	false
226	WP_124799873_2	false
227	WP_094931980_1	false
228	WP_121191582_2	false
229	RKS80725_2	false
230	WP_100806338_1	false
231	WP_049566251_1	false
232	SDE51953_3	false
233	WP_091040567_4	false
234	WP_117355837_2	false
235	WP_122198059_2	false
236	WP_100521517_2	false
237	WP_079611677_2	false
238	SFO39709_1	false
239	WP_083597719_1	false
240	GCB48186_1	false
241	WP_124441159_1	false
242	EWM17971_1	false
243	WP_084580442_2	false
244	EJJ05688_2	false
245	WP_040899039_2	false
246	WP_126382827_1	false
247	WP_126382826_1	false
248	EWM18075_2	false
249	WP_052396081_2	false
250	WP_082275447_3	false
251	ORC04864_2	false
252	WP_122819575_2	false
253	WP_071129084_3	false
254	WP_052396081_1	false
255	EWM18075_1	false
256	WP_097276114_1	false
257	WP_059190156_1	false
258	ONF71727_1	false
259	WP_083715654_1	false
260	WP_030172139_1	false
261	WP_030172142_1	false
262	WP_121394015_2	false
263	WP_092779820_2	false
264	WP_067908345_1	false
265	WP_092533827_1	false
266	WP_079054543_2	false
267	WP_086861034_2	false
268	SDY68794_2	false
269	WP_091159224_2	false
270	WP_126898321_1	false
271	SEC38602_1	false
272	WP_083019015_3	false
273	SIK72068_5	false
274	WP_123601960_3	false
275	WP_123601959_3	false
276	SFN21853_3	false
277	WP_083597223_2	false
278	SCD31130_3	false
279	WP_093544729_3	false
280	PDQ36095_5	false
281	PDQ36093_6	false
282	WP_084692314_5	false
283	WP_084692311_7	false
284	OKI46856_2	false
285	WP_079182634_2	false
286	WP_120571833_2	false
287	WP_120571834_2	false
288	WP_030288747_1	false
289	OJH69022_1	false
290	WP_053729790_1	false
291	WP_053729792_1	false
292	WP_037658204_2	false
293	WP_058846818_2	false
294	KOG82578_7	false
295	WP_083191919_6	false
296	WP_090014707_3	false
297	SDN00667_3	false
298	WP_084692314_3	false
299	WP_084692311_5	false
300	PDQ36095_1	false
301	PDQ36093_2	false
302	WP_082128669_1	false
303	KLO64220_3	false
304	WP_080754833_2	false
305	WP_052129072_2	false
306	WP_067823333_3	false
307	WP_084523472_2	false
308	KPI20077_1	false
309	WP_054213495_1	false
310	WP_111209344_3	false
311	WP_110911190_4	false
312	WP_101368245_1	false
313	PKV30436_1	false
314	OJV25031_2	false
315	OJV25031_3	false
316	WP_067972339_3	false
317	WP_111166051_3	false
318	WP_092862843_1	false
319	SDQ22037_1	false
320	SDN00667_4	false
321	WP_090014707_4	false
322	WP_116200011_3	false
323	OLB80605_4	false
324	WP_123601960_1	false
325	WP_123601959_1	false
326	EMF02011_3	false
327	WP_040887728_3	false
328	WP_123074529_2	false
329	WP_130451801_2	false
330	WP_062760655_3	false
331	WP_052499830_2	false
332	WP_030578068_2	false
333	WP_119286192_3	false
334	EFL12569_2	false
335	WP_078561279_3	false
336	WP_134128179_1	false
337	PZS01282_1	false
338	WP_063758854_1	false
339	WP_037862255_1	false
340	QBI53056_1	false
341	WP_131102102_1	false
342	WP_120205519_1	false
343	WP_119835460_1	false
344	AND16936_3	false
345	WP_084415931_3	false
346	WP_080654621_1	false
347	WP_129587643_3	false
348	WP_084415984_1	false
349	SEH00212_2	false
350	WP_071934999_1	false
351	WP_112443292_2	false
352	WP_023550873_2	false
353	WP_012086849_1	false
354	WP_018962008_7	false
355	WP_018962008_4	false
356	WP_028427539_3	false
357	WP_078515914_2	false
358	WP_064110435_2	false
359	WP_090039557_2	false
360	WP_121030237_1	false
361	RKT76768_1	false
362	SDQ22037_2	false
363	WP_092862843_2	false
364	ONF71729_1	false
365	WP_083715657_1	false
366	WP_121148667_2	false
367	RKT36058_3	false
368	WP_094002561_1	false
369	WP_116110588_1	false
370	WP_052318929_2	false
371	KIE24863_3	false
372	WP_093264055_1	false
373	SDR04557_1	false
374	WP_083597223_1	false
375	SFN21853_1	false
376	WP_089774243_3	false
377	SEE89807_2	false
378	WP_078841030_1	false
379	OPF84252_1	false
380	KOU46944_4	false
381	KOG82578_6	false
382	WP_093583210_5	false
383	WP_091114658_2	false
384	PDQ36093_3	false
385	PDQ36095_2	false
386	WP_091067169_3	false
387	SDG90099_2	false
388	WP_073452776_2	false
389	WP_017177815_1	false
390	KPC95547_3	false
391	WP_031027146_3	false
392	WP_084902797_2	false
393	OKJ94941_1	false
394	WP_114029352_1	false
395	WP_083982727_1	false
396	RPF24868_3	false
397	WP_123971014_4	false
398	WP_119286192_2	false
399	WP_030578068_1	false
400	PDQ36095_4	false
401	PDQ36099_2	false
402	WP_082115066_3	false
403	KJK44488_3	false
404	WP_131102102_9001	false
405	QBI53056_9001	false
406	ACZ89043_2	false
407	WP_081453250_2	false
408	WP_098744376_2	false
409	SBT66104_2	false
410	WP_083603298_3	false
411	OKL53160_3	false
412	OUE29606_1	false
413	OUE29607_1	false
414	WP_076002756_3	false
415	WP_052038751_3	false
416	WP_082008308_2	false
417	KHK96352_2	false
418	WP_035861760_2	false
419	EXG81129_2	false
420	KMT47190_5	false
421	WP_080968710_2	false
422	SEQ04975_1	false
423	WP_091073170_1	false
424	WP_133828511_2	false
425	WP_116708219_2	false
426	WP_071042994_4	false
427	WP_071042996_5	false
428	WP_033309246_2	false
429	WP_107308000_2	false
430	WP_083715657_2	false
431	ONF71729_2	false
432	WP_079177123_5	false
433	OIJ88146_5	false
434	EWM17971_2	false
435	WP_084580442_3	false
436	WP_082373216_1	false
437	WP_090073899_1	false
438	WP_089507734_2	false
439	OXL32905_2	false
440	AEV84085_1	false
441	WP_052311581_1	false
442	WP_117401161_1	false
443	WP_117401160_1	false
444	WP_087454409_2	false
445	BAM28031_2	false
446	WP_124441159_2	false
447	GCB48186_2	false
448	WP_123307848_1	false
449	ROS76630_1	false
450	WP_075973981_1	false
451	EWC60518_1	false
452	WP_131785730_2	false
453	WP_131785729_2	false
454	ORA12704_1	false
455	WP_083115866_1	false
456	WP_093610459_2	false
457	PWK29583_3	false
458	WP_077692191_1	false
459	WP_073704754_2	false
460	WP_107778338_1	false
461	WP_107778339_1	false
462	EMF02011_2	false
463	WP_040887728_2	false
464	WP_037658204_1	false
465	WP_058846818_1	false
466	EFF80328_3	false
467	WP_082163142_3	false
468	OUE27580_3	false
469	OUE27579_3	false
470	SEH00207_9005	false
471	SEH00212_3	false
472	WP_132186409_3	false
473	WP_132186408_3	false
474	WP_030288747_5	false
475	OJH69022_5	false
476	WP_093264055_2	false
477	SDR04557_2	false
478	WP_116154877_8	false
479	RED74809_8	false
480	WP_081476164_1	false
481	AEB46035_1	false
482	WP_020759490_1	false
483	WP_076002756_2	false
484	ERS23150_3	false
485	WP_080564860_1	false
486	OLF11310_2	false
487	OLF11310_1	false
488	SFO40826_2	false
489	WP_093357236_1	false
490	WP_026407791_2	false
491	WP_051268851_4	false
492	AGC62644_2	false
493	CDM77002_1	false
494	AJT41785_3	false
495	WP_082057091_3	false
496	WP_038682890_1	false
497	WP_086845754_1	false
498	WP_121005579_1	false
499	RKT54190_1	false
500	WP_079180155_2	false
501	SGI74060_2	false
502	WP_007495061_3	false
503	WP_028441277_3	false
504	SEQ04975_2	false
505	WP_091073170_2	false
506	WP_082128669_3	false
507	KLO64220_5	false
508	WP_112443341_1	false
509	WP_134664144_4	false
510	WP_107094495_1	false
511	KOV37396_1	false
512	WP_057611617_2	false
513	WP_057611617_1	false
514	WP_035849418_5	false
515	WP_035849420_8	false
516	OIJ88146_2	false
517	WP_079177123_2	false
518	KZE98020_1	false
519	WP_045196822_1	false
520	WP_075410821_1	false
521	WP_081384789_2	false
522	PWF27333_1	false
523	WP_133246044_1	false
524	WP_123292376_3	false
525	ROS45991_3	false
526	RED74809_4	false
527	WP_116154877_4	false
528	SFR28131_1	false
529	WP_093603934_1	false
530	WP_091051455_2	false
531	SDL22458_2	false
532	WP_083191919_4	false
533	KOG82578_5	false
534	WP_083296694_2	false
535	OFK71393_3	false
536	WP_071042994_2	false
537	WP_071042996_2	false
538	ONI88739_1	false
539	WP_083752781_1	false
540	WP_077689962_2	false
541	OOC53575_2	false
542	OIJ88146_6	false
543	WP_079177123_6	false
544	WP_009951067_4	false
545	CAM04239_5	false
546	WP_073785992_2	false
547	OKH95170_2	false
548	WP_110470681_2	false
549	PYE15898_2	false
550	SEE89807_1	false
551	WP_089774243_2	false
552	WP_088290452_2	false
553	WP_088261769_2	false
554	WP_017545560_2	false
555	WP_110050419_5	false
556	WP_107004474_3	false
557	WP_066216109_3	false
558	WP_121030237_3	false
559	RKT76768_3	false
560	WP_073387576_1	false
561	WP_095563712_4	false
562	ONI88739_2	false
563	WP_083752781_2	false
564	WP_094009173_1	false
565	WP_053676554_1	false
566	WP_084692311_4	false
567	WP_084692314_2	false
568	ROS45991_1	false
569	WP_123292376_1	false
570	OJV24806_1	false
571	OJV25031_1	false
572	WP_078590495_2	false
573	CCB71037_2	false
574	CAM04239_4	false
575	WP_009951067_3	false
576	WP_062760655_1	false
577	WP_122198059_3	false
578	KHK96352_1	false
579	WP_082008308_1	false
580	WP_116026137_2	false
581	WP_116026136_2	false
582	OKL53160_1	false
583	WP_083603298_1	false
584	WP_053775070_1	false
585	WP_029068734_3	false
586	ERS23150_2	false
587	EGY78124_2	false
588	WP_062097999_5	false
589	WP_128397239_5	false
590	WP_101557151_3	false
591	WP_101557149_3	false
592	WP_083191919_2	false
593	KOG82578_2	false
594	WP_046468711_1	false
595	WP_051458214_3	false
596	WP_067972339_1	false
597	WP_111166051_1	false
598	KQR47999_2	false
599	WP_082508744_2	false
600	WP_083115866_2	false
601	ORA12704_2	false
602	WP_100302197_1	false
603	PJJ46026_1	false
604	WP_112443292_6	false
605	WP_063274437_2	false
606	WP_122198059_1	false
607	WP_117355837_1	false
608	WP_091273394_4	false
609	WP_076825825_2	false
610	OPF84252_3	false
611	WP_078841030_3	false
612	AXG59058_3	false
613	ANS70161_3	false
614	WP_121030237_2	false
615	RKT76768_2	false
616	ACZ89043_4	false
617	WP_081453250_3	false
618	WP_132170149_1	false
619	WP_132170147_1	false
620	OJV24808_3	false
621	OJV24806_3	false
622	WP_116154877_7	false
623	RED74809_7	false
624	WP_100302197_2	false
625	PJJ46026_2	false
626	WP_105032337_2	false
627	WP_104181080_2	false
628	WP_125614105_1	false
629	PDQ36469_2	false
630	WP_061787443_4	false
631	WP_130875440_1	false
632	WP_017568552_3	false
633	WP_017568553_3	false
634	WP_135448567_2	false
635	WP_096168585_3	false
636	WP_131965735_4	false
637	WP_131965734_3	false
638	WP_078590495_1	false
639	CCB71037_1	false
640	WP_084692311_6	false
641	WP_084692314_4	false
642	OKI46856_3	false
643	WP_079182634_3	false
644	WP_048317341_2	false
645	WP_048316860_2	false
646	EXG81129_1	false
647	WP_035861760_1	false
648	WP_103960548_1	false
649	SEG99236_1	false
650	WP_133828511_1	false
651	WP_116708219_1	false
652	EGQ75425_4	false
653	WP_034253534_4	false
654	WP_040887728_4	false
655	EMF02011_4	false
656	WP_082115066_4	false
657	KJK44488_5	false
658	WP_079180155_1	false
659	SGI74060_1	false
660	WP_085213387_1	false
661	SMF78969_1	false
662	RLV71217_2	false
663	WP_073876556_3	false
664	OBA55656_3	false
665	WP_064833209_2	false
666	SCD31130_1	false
667	WP_093544729_1	false
668	WP_055578070_5	false
669	RUP01435_5	false
670	ROS45991_2	false
671	WP_017559667_3	false
672	WP_131965735_3	false
673	WP_131965734_2	false
674	WP_051777853_1	false
675	WP_100861846_2	false
676	WP_082248115_3	false
677	OQM68597_3	false
678	WP_080684945_1	false
679	WP_080909324_1	false
680	WP_124566915_1	false
681	WP_075831737_1	false
682	WP_091216389_3	false
683	SDL97273_3	false
684	WP_030701973_2	false
685	KPI20077_3	false
686	WP_054213495_3	false
687	WP_119105432_2	false
688	WP_051338384_1	false
689	WP_125314889_1	false
690	WP_106674009_1	false
691	REF98980_2	false
692	SCG59471_1	false
693	WP_053652832_3	false
694	WP_069774196_3	false
695	SDE51953_4	false
696	WP_091040567_5	false
697	WP_116154877_6	false
698	RED74809_6	false
699	PKV33869_6	false
700	WP_043591397_2	false
701	WP_108913844_2	false
702	WP_076804070_2	false
703	WP_107120384_3	false
704	KUN25245_3	false
705	WP_059193363_3	false
706	WP_081900771_1	false
707	SDM16976_1	false
708	WP_086828879_1	false
709	WP_083715654_5	false
710	ONF71727_5	false
711	WP_072028150_2	false
712	WP_076843253_2	false
713	WP_076843254_2	false
714	KLL12571_3	false
715	WP_127571148_1	false
716	EFF80328_1	false
717	WP_082163142_1	false
718	EWM64891_1	false
719	WP_082931047_1	false
720	WP_083296959_1	false
721	WP_083296959_3	false
722	WP_082931047_3	false
723	EWM64891_3	false
724	WP_099279259_5	false
725	WP_134664144_5	false
726	WP_134664144_7	false
727	WP_098695120_3	false
728	WP_082871442_2	false
729	KZM72684_2	false
730	SDH11838_5	false
731	WP_093170892_5	false
732	WP_093170943_3	false
733	WP_131103335_2	false
734	KLO64220_4	false
735	WP_082128669_2	false
736	EWM64891_2	false
737	WP_082931047_2	false
738	WP_083296959_2	false
739	WP_125547276_1	false
740	CUM40551_5	false
741	WP_079037558_6	false
742	SDE51953_1	false
743	WP_091040567_2	false
744	WP_082822395_1	false
745	WP_093170892_2	false
746	WP_093170943_1	false
747	SDH11838_2	false
748	WP_132619812_2	false
749	WP_009951067_2	false
750	CAM04239_3	false
751	WP_052318929_1	false
752	AKJ13608_3	false
753	KIE24863_1	false
754	WP_125792333_4	false
755	WP_093601012_1	false
756	SFK92414_3	false
757	WP_130490932_1	false
758	WP_129176857_3	false
759	WP_053775070_2	false
760	WP_070795263_3	false
761	WP_088246551_3	false
762	OMO45941_2	false
763	EME16460_2	false
764	WP_007536321_2	false
765	WP_043809367_2	false
766	WP_110565442_9001	false
767	WP_074475319_9003	false
768	WP_091614694_9002	false
769	WP_061300719_1	false
770	WP_061300720_1	false
771	WP_061300721_1	false
772	WP_092888237_1	false
773	WP_092888237_3	false
774	WP_135971800_3	false
775	WP_092807119_3	false
776	WP_091247291_2	false
777	SCX58064_3	false
778	SFI84698_2	false
779	ACZ89043_3	false
780	WP_081937495_2	false
781	WP_130329265_1	false
782	WP_044386624_1	false
783	WP_116150435_1	false
784	RKS80725_1	false
785	WP_121191582_1	false
786	WP_007495061_1	false
787	ESU58068_3	false
788	WP_046096646_3	false
789	WP_087454414_3	false
790	KUM76187_1	false
791	WP_079051299_1	false
792	AFJ68075_1	false
793	SDG32337_1	false
794	WP_090009591_1	false
795	SDL74859_1	false
796	WP_083603298_2	false
797	OKL53160_2	false
798	WP_082248115_2	false
799	WP_066217216_1	false
800	WP_082724316_1	false
801	SEB29931_3	false
802	AXG59058_1	false
803	WP_079164984_1	false
804	ANS70161_1	false
805	WP_083597719_2	false
806	WP_101786715_1	false
807	SFO39709_2	false
808	KUN25245_4	false
809	WP_059193363_4	false
810	WP_107120384_4	false
811	RKT36058_2	false
812	WP_058623611_1	false
813	WP_121148667_1	false
814	WP_051816122_1	false
815	WP_111506795_3	false
816	WP_125499925_1	false
817	WP_083318853_2	false
818	WP_083304061_2	false
819	OFL66352_2	false
820	WP_057232473_1	false
821	WP_128378882_1	false
822	WP_030269598_1	false
823	KUN25245_2	false
824	WP_107120384_2	false
825	WP_059193363_2	false
826	RPK69291_1	false
827	WP_124271723_1	false
828	WP_116209352_1	false
829	OIJ88146_4	false
830	WP_023554016_1	false
831	WP_079177123_4	false
832	AGC62644_1	false
833	CDM77002_2	false
834	WP_020787304_1	false
835	WP_030877129_2	false
836	WP_082871442_1	false
837	KZM72684_1	false
838	WP_067972339_5	false
839	KPC62607_3	false
840	WP_078971081_3	false
841	SER15522_1	false
842	SMC91639_1	false
843	WP_089952439_1	false
844	AKJ13608_5	false
845	WP_055553439_1	false
846	WP_037862255_2	false
847	WP_006143940_1	false
848	WP_100806338_2	false
849	WP_126890470_1	false
850	WP_104181080_1	false
851	WP_098514311_1	false
852	WP_105032337_1	false
853	PJJ39560_4	false
854	WP_100302786_4	false
855	WP_078564093_4	false
856	WP_057608322_3	false
857	WP_123074529_4	false
858	WP_094009173_4	false
859	WP_101557151_1	false
860	WP_101557149_1	false
861	WP_116200011_2	false
862	WP_061409829_2	false
863	WP_075142776_2	false
864	AFK17249_2	false
865	WP_078561279_4	false
866	WP_014690715_1	false
867	EFL12569_3	false
868	WP_071042996_1	false
869	WP_104167780_1	false
870	WP_071042994_1	false
871	WP_113979657_5	false
872	ANN17130_2	false
873	WP_103341360_2	false
874	WP_111209344_1	false
875	WP_110911190_2	false
876	SBN62121_2	false
877	WP_070739770_2	false
878	WP_070739770_4	false
879	WP_070739770_3	false
880	WP_082057091_2	false
881	WP_131626375_2	false
882	AJT41785_2	false
883	WP_054567598_3	false
884	WP_091272827_2	false
885	WP_091272829_2	false
886	WP_076824657_3	false
887	SIR58548_3	false
888	WP_113985589_4	false
889	WP_111167565_5	false
890	WP_049570352_6	false
891	WP_075012634_3	false
892	WP_093583210_4	false
893	SFO01480_4	false
894	WP_089404560_4	false
895	WP_061300623_4	false
896	WP_062349267_3	false
897	WP_066366076_4	false
898	WP_062440803_4	false
899	WP_088986452_1	false
900	SCE72235_1	false
901	SCE72260_1	false
902	WP_088991224_1	false
903	WP_017568552_2	false
904	WP_121185217_1	false
905	WP_017568553_2	false
906	WP_121185218_2	false
907	WP_089156471_1	false
908	WP_015663091_5	false
909	WP_084902797_1	false
910	WP_125813086_6	false
911	WP_033306993_1	false
912	WP_029068734_1	false
913	WP_034274384_1	false
914	WP_081655210_1	false
915	WP_093655900_1	false
916	WP_085014622_1	false
917	WP_093849541_4	false
918	WP_085014620_1	false
919	WP_131883639_1	false
920	WP_135231520_1	false
921	WP_132175704_1	false
922	WP_131965720_1	false
923	KOG82578_1	false
924	WP_083191919_1	false
925	SDE31545_1	false
926	KOU46944_1	false
927	WP_091051455_1	false
928	WP_105032337_4	false
929	SDL22458_1	false
930	WP_104181080_4	false
931	SCL44965_4	false
932	WP_091094891_2	false
933	WP_111166051_2	false
934	WP_067972339_2	false
935	WP_132268317_3	false
936	WP_132388264_4	false
937	WP_132388266_4	false
938	WP_132268319_3	false
939	KHK96352_4	false
940	WP_082008308_3	false
941	WP_083982727_3	false
942	WP_083982727_4	false
943	WP_017568552_1	false
944	WP_017568553_1	false
945	WP_078515914_1	false
946	WP_028427539_1	false
947	WP_091460541_1	false
948	WP_018657395_3	false
949	WP_121801511_6	false
950	WP_132172132_2	false
951	WP_132388264_3	false
952	WP_132186408_2	false
953	WP_132186409_2	false
954	WP_132388266_3	false
955	AXK36690_2	false
956	WP_027737668_2	false
957	AXK36692_1	false
958	WP_027737671_2	false
959	WP_031012255_4	false
960	WP_107442966_6	false
961	WP_057576508_4	false
962	WP_078909294_8	false
963	WP_091553165_2	false
964	SCX58064_2	false
965	WP_091067169_2	false
966	WP_092807119_2	false
967	OUE27579_2	false
968	WP_086513414_3	false
969	OUE27580_2	false
970	WP_086513413_3	false
971	WP_120571834_1	false
972	WP_123601959_2	false
973	WP_123601960_2	false
974	WP_120571833_1	false
975	WP_107657165_1	false
976	WP_131965720_2	false
977	WP_132175704_2	false
978	WP_135231520_2	false
979	KDN17331_1	false
980	WP_067592598_1	false
981	WP_116200011_1	false
982	WP_084093827_1	false
983	OMC50887_1	false
984	OMC41183_1	false
985	WP_083679341_1	false
986	WP_083667099_1	false
987	WP_091040567_3	false
988	WP_091051455_3	false
989	SDL22458_3	false
990	SDE51953_2	false
991	SDE31545_5	false
992	KOU46944_2	false
993	WP_083191919_5	false
994	KOG82578_3	false
995	SDY68794_1	false
996	WP_091216389_1	false
997	SDL97273_1	false
998	WP_091159224_1	false
999	WP_084211656_1	false
1000	ODU05661_1	false
1001	ALE82507_1	false
1002	WP_132047282_3	false
1003	WP_026174640_2	false
1004	SEB29931_2	false
1005	AJT41785_1	false
1006	SEC29390_3	false
1007	WP_082057091_1	false
1008	WP_091289566_1	false
1009	SFB39971_1	false
1010	WP_091674323_1	false
1011	WP_091289566_3	false
1012	WP_091289566_2	false
1013	OQM68597_1	false
1014	WP_080684945_2	false
1015	WP_132339706_2	false
1016	WP_082248115_1	false
1017	WP_124284474_1	false
1018	WP_109092842_1	false
1019	WP_133246044_3	false
1020	KTR94659_3	false
1021	WP_081323045_3	false
1022	PWF27333_3	false
1023	PJJ39560_1	false
1024	WP_078572841_1	false
1025	WP_078564093_1	false
1026	RZU94771_1	false
1027	WP_100302786_1	false
1028	SDC53518_2	false
1029	WP_089404560_3	false
1030	WP_091365795_2	false
1031	WP_073419543_2	false
1032	SHF79230_2	false
1033	WP_089298084_1	false
1034	WP_046567642_1	false
1035	PWK29583_1	false
1036	WP_093610459_1	false
1037	WP_089157775_1	false
1038	AKS13949_2	false
1039	WP_048589183_3	false
1040	AIG09585_3	false
1041	AKP09252_3	false
1042	AER69640_3	false
1043	WP_081384789_1	false
1044	OLO48687_1	false
1045	WP_075410821_9002	false
1046	WP_082508744_1	false
1047	KQR47999_1	false
1048	WP_046085362_4	false
1049	WP_078841030_4	false
1050	OPF84252_4	false
1051	OPF84252_2	false
1052	WP_078841030_2	false
1053	WP_104820017_1	false
1054	WP_104820017_3	false
1055	WP_051778263_1	false
1056	WP_057236399_1	false
1057	WP_104820017_2	false
1058	WP_049563074_2	false
1059	WP_057611617_3	false
1060	WP_101404757_2	false
1061	WP_028441277_2	false
1062	WP_018522479_2	false
1063	ADD99586_6	false
1064	EGR94682_5	false
1065	WP_075371528_1	false
1066	ADD99586_1	false
1067	EGR94682_2	false
1068	WP_108724550_2	false
1069	KPC95547_1	false
1070	WP_031027146_2	false
1071	WP_107100134_1	false
1072	WP_110666035_1	false
1073	EUA04475_3	false
1074	WP_122441228_1	false
1075	WP_023370892_1	false
1076	OOK66964_2	false
1077	WP_063469930_2	false
1078	WP_056678071_6	false
1079	WP_055699111_7	false
1080	WP_093640559_4	false
1081	WP_126382680_3	false
1082	VEG28624_3	false
1083	WP_078966254_1	false
1084	PIF99032_1	false
1085	WP_128433746_1	false
1086	WP_050514186_1	false
1087	WP_099938361_1	false
1088	WP_050507047_1	false
1089	WP_071967420_1	false
1090	WP_017557210_1	false
1091	WP_030877129_1	false
1092	WP_073700824_1	false
1093	WP_089254486_1	false
1094	WP_090799956_1	false
1095	WP_119286192_1	false
1096	WP_091094839_1	false
1097	WP_093656413_1	false
1098	WP_120688998_1	false
1099	WP_127935985_6	false
1100	WP_051709136_1	false
1101	WP_084436210_1	false
1102	WP_028567914_3	false
1103	WP_018962008_3	false
1104	WP_018962008_2	false
1105	WP_084692314_1	false
1106	WP_084692311_3	false
1107	WP_093655900_3	false
1108	WP_093849541_2	false
1109	WP_027743449_1	false
1110	WP_124799873_1	false
1111	WP_085014622_3	false
1112	WP_093766414_1	false
1113	WP_132388264_1	false
1114	WP_132186409_1	false
1115	WP_132268319_1	false
1116	WP_132268317_1	false
1117	WP_132186408_1	false
1118	WP_132388266_1	false
1119	WP_091247291_1	false
1120	WP_092807119_1	false
1121	SCX58064_1	false
1122	SDG90099_1	false
1123	WP_091553165_1	false
1124	WP_091067169_1	false
1125	WP_133437797_1	false
1126	WP_055578070_3	false
1127	WP_083271029_2	false
1128	RUP01435_2	false
1129	WP_085249702_2	false
1130	ODR23958_2	false
1131	WP_091030566_2	false
1132	SCL44965_3	false
1133	SCL44965_2	false
1134	WP_131761782_2	false
1135	WP_014176997_1	false
1136	WP_091094891_1	false
1137	WP_026413549_9004	false
1138	WP_127935985_5	false
1139	WP_120688998_9002	false
1140	AEM00621_9001	false
1141	WP_061921822_9003	false
1142	WP_091094839_9004	false
1143	WP_027743449_6	false
1144	WP_085014622_5	false
1145	WP_117228579_2	false
1146	WP_035849420_6	false
1147	WP_109186559_2	false
1148	WP_117228578_2	false
1149	WP_049804670_1	false
1150	WP_117228578_1	false
1151	WP_117228580_1	false
1152	WP_013865884_1	false
1153	WP_117228579_1	false
1154	BAK38069_1	false
1155	WP_013865882_1	false
1156	WP_076824657_2	false
1157	WP_124003201_2	false
1158	WP_091272829_3	false
1159	WP_131626375_3	false
1160	WP_091272827_3	false
1161	RPE52214_2	false
1162	WP_124003633_2	false
1163	WP_103517755_2	false
1164	WP_051386825_1	false
1165	WP_054222272_1	false
1166	WP_115914639_1	false
1167	WP_071377378_1	false
1168	WP_084415984_2	false
1169	WP_018550650_1	false
1170	WP_004004118_2	false
1171	WP_035849420_5	false
1172	WP_035849418_3	false
1173	WP_084011357_4	false
1174	WP_045877303_4	false
1175	WP_067284698_2	false
1176	WP_104263679_2	false
1177	WP_015618321_1	false
1178	WP_057576508_3	false
1179	WP_078909294_7	false
1180	WP_031012255_1	false
1181	SDN00667_2	false
1182	WP_107442966_5	false
1183	WP_090014707_2	false
1184	SEC38602_2	false
1185	WP_086824496_1	false
1186	WP_121394015_1	false
1187	WP_125813086_2	false
1188	WP_126898321_2	false
1189	WP_092779820_1	false
1190	WP_030432198_1	false
1191	WP_089157775_2	false
1192	WP_067306280_1	false
1193	WP_088972034_1	false
1194	WP_088988891_1	false
1195	WP_120728438_1	false
1196	WP_046567642_2	false
1197	WP_088948967_1	false
1198	WP_114055833_1	false
1199	WP_086845754_2	false
1200	TDU80263_1	false
1201	WP_125541988_1	false
1202	WP_103491678_3	false
1203	WP_053787331_1	false
1204	WP_030633187_2	false
1205	WP_078564093_2	false
1206	WP_078572841_2	false
1207	PJJ39560_2	false
1208	WP_100302786_2	false
1209	WP_052770273_1	false
1210	AKH86621_1	false
1211	RZU94771_2	false
1212	ACZ89043_1	false
1213	WP_086572205_1	false
1214	KLO64220_1	false
1215	WP_081937495_1	false
1216	SFI84698_1	false
1217	WP_081453250_1	false
1218	WP_093886633_1	false
1219	OMO45941_3	false
1220	WP_088264775_2	false
1221	PKB45316_2	false
1222	WP_053587900_2	false
1223	WP_088261769_1	false
1224	WP_100886407_2	false
1225	WP_088246551_2	false
1226	WP_053729790_2	false
1227	WP_100584684_1	false
1228	WP_053729792_2	false
1229	RPF24868_2	false
1230	WP_100886407_1	false
1231	PKB45316_1	false
1232	AKJ15899_3	false
1233	WP_123971014_2	false
1234	WP_085014622_4	false
1235	WP_093766414_3	false
1236	WP_093655900_4	false
1237	WP_027743449_3	false
1238	WP_064110435_5	false
1239	WP_090039557_5	false
1240	WP_085014620_3	false
1241	WP_093849541_3	false
1242	WP_131785729_1	false
1243	WP_004004118_1	false
1244	WP_035849420_4	false
1245	WP_035849418_2	false
1246	WP_045877303_2	false
1247	WP_131785730_1	false
1248	WP_084011357_2	false
1249	WP_067284698_1	false
1250	WP_061787443_2	false
1251	WP_089950617_1	false
1252	WP_066215709_1	false
1253	WP_109280137_1	false
1254	WP_052852666_1	false
1255	WP_109280200_1	false
1256	SEQ53933_1	false
1257	SEC29390_1	false
1258	BAG17422_1	false
1259	WP_055559179_2	false
1260	WP_106731546_1	false
1261	KOG82578_4	false
1262	SDE31545_2	false
1263	KOU46944_3	false
1264	WP_083191919_3	false
1265	WP_052295615_1	false
1266	WP_090047429_4	false
1267	WP_089952439_2	false
1268	SER15522_2	false
1269	WP_109636347_1	false
1270	PWK88358_1	false
1271	SMC91639_2	false
1272	WP_090064781_1	false
1273	WP_093590338_1	false
1274	WP_090003614_1	false
1275	WP_073785992_4	false
1276	WP_121006702_1	false
1277	EIF94124_2	false
1278	KJY27974_1	false
1279	KOV37396_2	false
1280	OKH95170_4	false
1281	WP_051771079_1	false
1282	WP_078902009_1	false
1283	WP_062703680_1	false
1284	WP_030462613_2	false
1285	WP_037881970_3	false
1286	WP_088799351_2	false
1287	WP_088799362_4	false
1288	WP_088799362_3	false
1289	WP_067603246_1	false
1290	WP_053747924_3	false
1291	WP_111415595_4	false
1292	WP_030040480_4	false
1293	WP_063471945_1	false
1294	WP_085252934_1	false
1295	EUA05503_1	false
1296	WP_085105271_1	false
1297	WP_085671318_1	false
1298	WP_122530149_1	false
1299	WP_083102943_1	false
1300	OOK83994_1	false
1301	WP_083115648_1	false
1302	WP_085014622_2	false
1303	WP_085014620_2	false
1304	WP_027743449_5	false
1305	WP_093655900_6	false
1306	WP_093766414_5	false
1307	WP_093849541_6	false
1308	WP_064110435_4	false
1309	WP_090039557_4	false
1310	WP_035849420_3	false
1311	WP_090039557_1	false
1312	WP_085014620_5	false
1313	WP_093655900_2	false
1314	WP_035849420_2	false
1315	WP_027743449_2	false
1316	WP_093849541_1	false
1317	WP_085014622_7	false
1318	WP_093766414_2	false
1319	WP_064110435_1	false
1320	KZC95159_1	false
1321	WP_086515725_1	false
1322	WP_104343881_1	false
1323	WP_043668521_1	false
1324	WP_086517141_1	false
1325	OUE10317_1	false
1326	WP_053775823_1	false
1327	AWF97203_1	false
1328	OUE24647_1	false
1329	WP_037862255_3	false
1330	WP_055482843_1	false
1331	WP_063758854_2	false
1332	WP_063832391_1	false
1333	WP_055553439_2	false
1334	AKJ13608_4	false
1335	KIE24863_5	false
1336	WP_051458184_1	false
1337	WP_004018421_2	false
1338	WP_037881970_2	false
1339	WP_067603246_2	false
1340	WP_030040480_2	false
1341	WP_030462613_1	false
1342	WP_088799351_1	false
1343	WP_111415595_3	false
1344	WP_053747924_1	false
1345	WP_088799362_2	false
1346	WP_063274437_1	false
1347	WP_062440803_1	false
1348	WP_114029832_1	false
1349	SIR58548_1	false
1350	WP_066366076_1	false
1351	WP_062349267_1	false
1352	WP_049570352_3	false
1353	WP_015622289_1	false
1354	WP_111167565_1	false
1355	WP_061300623_1	false
1356	WP_113985589_1	false
1357	WP_018657395_2	false
1358	ALE82507_2	false
1359	WP_132339706_4	false
1360	WP_075941351_1	false
1361	WP_113979595_1	false
1362	WP_129800352_1	false
1363	WP_061294147_1	false
1364	WP_092533827_2	false
1365	WP_117404578_1	false
1366	WP_132172132_1	false
1367	WP_017559667_2	false
1368	OFK71393_2	false
1369	WP_017559667_1	false
1370	WP_083296694_1	false
1371	WP_017608824_2	false
1372	WP_046468711_3	false
1373	WP_120205519_2	false
1374	WP_119835460_2	false
1375	WP_101559196_2	false
1376	WP_131103335_5	false
1377	WP_091114658_1	false
1378	WP_106275543_1	false
1379	SFO01480_1	false
1380	PYG35723_2	false
1381	WP_093583210_1	false
1382	WP_110909804_2	false
1383	SDC53518_1	false
1384	WP_089404560_2	false
1385	WP_091365795_1	false
1386	WP_075012634_1	false
1387	AKH86621_2	false
1388	ANS70161_2	false
1389	PJJ39560_3	false
1390	WP_078572841_3	false
1391	WP_131561563_1	false
1392	RZU94771_3	false
1393	WP_052770273_2	false
1394	WP_078564093_3	false
1395	WP_100302786_3	false
1396	AXG59058_2	false
1397	WP_092556553_3	false
1398	WP_017589866_3	false
1399	WP_100806338_6	false
1400	WP_059190156_4	false
1401	WP_023554016_3	false
1402	WP_124286732_7	false
1403	WP_100806338_7	false
1404	WP_006347379_1	false
1405	WP_030633187_1	false
1406	WP_114032054_1	false
1407	WP_123603612_2	false
1408	SBO93312_1	false
1409	SPL97283_1	false
1410	WP_134033092_1	false
1411	WP_103960548_2	false
1412	WP_090941614_2	false
1413	WP_113984581_2	false
1414	WP_084772427_3	false
1415	SEG99236_2	false
1416	WP_111170305_1	false
1417	WP_012891705_1	false
1418	WP_080042116_1	false
1419	WP_113979657_4	false
1420	WP_114018158_1	false
1421	WP_084211656_2	false
1422	WP_079171959_1	false
1423	WP_111166051_7	false
1424	WP_099881056_1	false
1425	WP_114021280_1	false
1426	WP_027760735_1	false
1427	OEV01037_1	false
1428	WP_086575168_3	false
1429	WP_111035529_1	false
1430	WP_043014356_2	false
1431	ESU58068_2	false
1432	WP_046096646_2	false
1433	AIG09585_2	false
1434	AKS13949_1	false
1435	AER69640_1	false
1436	WP_087454414_2	false
1437	AKP09252_2	false
1438	WP_038620030_2	false
1439	WP_048589183_2	false
1440	WP_054468484_3	false
1441	WP_036403339_1	false
1442	WP_083271029_1	false
1443	WP_055578070_1	false
1444	WP_122442751_1	false
1445	WP_065136618_1	false
1446	WP_065164254_2	false
1447	WP_075510821_1	false
1448	WP_133437797_2	false
1449	ORC04413_1	false
1450	RUP01435_1	false
1451	ODR23958_1	false
1452	WP_091448332_1	false
1453	SDY68794_3	false
1454	WP_041241887_1	false
1455	WP_089304860_1	false
1456	WP_091159224_3	false
1457	SDL97273_2	false
1458	WP_091374161_1	false
1459	WP_113781263_1	false
1460	ADB73782_1	false
1461	SDN42488_1	false
1462	WP_091216389_2	false
1463	WP_015622289_3	false
1464	WP_113985589_3	false
1465	WP_061300623_3	false
1466	SIR58548_2	false
1467	WP_084316863_1	false
1468	WP_114029832_3	false
1469	WP_081903334_1	false
1470	WP_111167565_4	false
1471	WP_111700764_2	false
1472	WP_083744315_1	false
1473	WP_049570352_4	false
1474	WP_066366076_3	false
1475	WP_110909804_3	false
1476	SFO01480_3	false
1477	WP_076159164_1	false
1478	WP_089404560_1	false
1479	WP_110909804_1	false
1480	PYG35723_3	false
1481	SFO01480_2	false
1482	WP_075012634_2	false
1483	SHF79230_1	false
1484	WP_073419543_1	false
1485	WP_093583210_2	false
1486	PYG35723_1	false
1487	WP_108249502_1	false
1488	KZC95159_2	false
1489	WP_086517141_2	false
1490	OUE10317_2	false
1491	AWF97203_2	false
1492	WP_087197904_2	false
1493	WP_119402500_1	false
1494	WP_086515725_2	false
1495	WP_104343881_2	false
1496	OUE24647_2	false
1497	WP_053775823_2	false
1498	WP_043668521_2	false
1499	WP_100243842_1	false
1500	WP_048819674_1	false
1501	AFV25483_1	false
1502	WP_020115555_1	false
1503	GAQ63669_1	false
1504	AFV25482_1	false
1505	WP_059081288_1	false
1506	CBG72692_1	false
1507	WP_005486705_1	false
1508	EMF50559_1	false
1509	EKX68557_1	false
1510	WP_059081255_1	false
1511	EKX68554_1	false
1512	WP_082822395_2	false
1513	WP_100806338_4	false
1514	YP_008998156_1	false
1515	WP_030794381_3	false
1516	WP_100521517_1	false
1517	WP_079611677_1	false
1518	WP_084521174_1	false
1519	WP_055633699_1	false
1520	WP_033309246_1	false
1521	WP_121801511_3	false
1522	WP_114626704_1	false
1523	WP_015663091_1	false
1524	WP_019885858_2	false
1525	WP_079099227_1	false
1526	COV92604_1	false
1527	CFS33831_1	false
1528	EFD73056_2	false
1529	CKX97298_1	false
1530	EGB29232_1	false
1531	COV81994_1	false
1532	AKR01079_1	false
1533	WP_031737334_1	false
1534	COV23412_1	false
1535	WP_075911259_1	false
1536	WP_086155057_1	false
1537	SGD85762_1	false
1538	OOK64193_1	false
1539	EPQ80131_3	false
1540	RUP01435_3	false
1541	WP_085249702_3	false
1542	WP_086085423_2	false
1543	ORC04413_2	false
1544	WP_036403339_3	false
1545	WP_055578070_2	false
1546	WP_122442751_2	false
1547	WP_075510821_2	false
1548	WP_065164254_1	false
1549	WP_083046415_1	false
1550	WP_085160326_1	false
1551	WP_085673955_1	false
1552	WP_024818115_4	false
1553	AFR30485_4	false
1554	WP_128397239_4	false
1555	WP_062097999_4	false
1556	AOY69839_4	false
1557	WP_031216848_4	false
1558	WP_043470682_4	false
1559	WP_028265499_5	false
1560	WP_062071474_4	false
1561	SCZ59071_4	false
1562	WP_091470208_4	false
1563	WP_089596247_4	false
1564	WP_105691909_4	false
1565	WP_026542026_4	false
1566	WP_075814930_1	false
1567	WP_017589866_5	false
1568	WP_073704754_3	false
1569	WP_121183327_2	false
1570	PSK95408_1	false
1571	WP_053619387_2	false
1572	WP_075924874_2	false
1573	WP_047868005_1	false
1574	WP_017615044_1	false
1575	WP_087102102_3	false
1576	WP_017563703_1	false
1577	WP_097636337_1	false
1578	WP_017617728_1	false
1579	WP_017596140_1	false
1580	WP_077692191_2	false
1581	EGQ75425_1	false
1582	WP_075376581_1	false
1583	WP_009405321_2	false
1584	WP_075417427_1	false
1585	WP_126382680_1	false
1586	WP_075414364_1	false
1587	WP_075375613_1	false
1588	WP_034253534_1	false
1589	VEG28624_1	false
1590	WP_075405296_1	false
1591	WP_026408316_1	false
1592	WP_124933089_1	false
1593	WP_126414579_1	false
1594	WP_026426216_1	false
1595	WP_075412233_1	false
1596	WP_124933089_2	false
1597	WP_075414364_2	false
1598	WP_075375613_2	false
1599	WP_034253534_2	false
1600	WP_009405321_1	false
1601	WP_075417427_2	false
1602	WP_026408316_2	false
1603	WP_126414579_2	false
1604	WP_126382680_2	false
1605	WP_075376581_2	false
1606	EGQ75425_2	false
1607	VEG28624_2	false
1608	WP_075405296_2	false
1609	WP_026426216_2	false
1610	WP_075846085_1	false
1611	WP_075412233_2	false
1612	WP_111167565_3	false
1613	WP_113985589_2	false
1614	WP_114029832_2	false
1615	WP_066366076_5	false
1616	WP_062440803_3	false
1617	WP_015622289_2	false
1618	WP_061300623_2	false
1619	WP_111167565_2	false
1620	WP_066366076_2	false
1621	WP_049570352_1	false
1622	WP_084316863_3	false
1623	WP_093603934_2	false
1624	WP_062349267_4	false
1625	WP_015622289_4	false
1626	SFR28131_2	false
1627	WP_062349267_2	false
1628	WP_062440803_2	false
1629	OMO45941_1	false
1630	WP_054468484_1	false
1631	WP_088246551_1	false
1632	WP_070795263_1	false
1633	WP_043014356_1	false
1634	WP_088264775_1	false
1635	WP_075142776_1	false
1636	WP_046096646_1	false
1637	AIG09585_1	false
1638	WP_087454414_1	false
1639	BAM28031_1	false
1640	ESU58068_1	false
1641	WP_087454409_1	false
1642	WP_061409829_1	false
1643	WP_048589183_1	false
1644	WP_038620030_1	false
1645	WP_088290452_1	false
1646	AFK17249_1	false
1647	AKP09252_1	false
1648	WP_123292368_1	false
1649	WP_053775070_4	false
1650	WP_053775076_9003	false
1651	WP_123292376_2	false
1652	KTR94659_9002	false
1653	WP_084253025_1	false
1654	WP_058623611_2	false
1655	WP_081323045_9002	false
1656	WP_106109992_1	false
1657	WP_053775076_1	false
1658	WP_081323045_2	false
1659	WP_053775070_3	false
1660	KTR94659_2	false
1661	WP_058623611_3	false
1662	WP_106109998_1	false
1663	WP_051268851_2	false
1664	WP_051268851_1	false
1665	WP_064833209_3	false
1666	WP_064833216_2	false
1667	WP_084253023_5	false
1668	AFV25483_2	false
1669	EMF50559_2	false
1670	WP_019887079_1	false
1671	WP_059081288_2	false
1672	WP_013003263_1	false
1673	WP_109280200_2	false
1674	AFU90402_2	false
1675	GAQ63669_2	false
1676	EKX68557_2	false
1677	EKX68554_2	false
1678	WP_048819674_2	false
1679	WP_109280137_2	false
1680	WP_019549855_1	false
1681	WP_019887077_1	false
1682	AFV25482_3	false
1683	WP_005486705_2	false
1684	WP_059081255_2	false
1685	WP_100243842_2	false
1686	WP_020115555_2	false
1687	CBG72692_2	false
1688	WP_084253023_4	false
1689	WP_136207038_4	false
1690	OBA55656_2	false
1691	WP_064833209_1	false
1692	WP_083926625_1	false
1693	WP_113984581_1	false
1694	WP_069774196_1	false
1695	ERS23150_1	false
1696	WP_080564860_2	false
1697	WP_125614105_4	false
1698	WP_136207038_3	false
1699	EGE49931_1	false
1700	WP_012360880_1	false
1701	AGL26862_2	false
1702	WP_124934048_1	false
1703	WP_078590495_3	false
1704	KAU25380_1	false
1705	WP_131103335_1	false
1706	KCR02833_1	false
1707	EGY78124_1	false
1708	CCB71037_3	false
1709	WP_136207038_1	false
1710	WP_094009173_2	false
1711	WP_116154877_1	false
1712	WP_101385752_1	false
1713	WP_123074529_1	false
1714	KPC62607_1	false
1715	WP_005477225_1	false
1716	EMF26273_1	false
1717	WP_079177123_1	false
1718	PKV33869_3	false
1719	WP_023550873_1	false
1720	WP_134664144_1	false
1721	WP_078971081_1	false
1722	WP_057608322_1	false
1723	WP_018522479_1	false
1724	WP_099279259_1	false
1725	RED74809_1	false
1726	WP_028441277_1	false
1727	WP_129292093_1	false
1728	WP_099887535_1	false
1729	OIJ88146_1	false
1730	WP_053676554_2	false
1731	WP_069774196_2	false
1732	WP_030570393_1	false
1733	WP_086702179_1	false
1734	WP_050514186_3	false
1735	WP_107308000_1	false
1736	WP_124286732_1	false
1737	WP_107307769_1	false
1738	WP_002518052_2	false
1739	WP_040899039_9002	false
1740	AKJ11407_9005	false
1741	EJJ05688_9003	false
1742	WP_131102102_9002	false
1743	WP_017535900_9002	false
1744	WP_051007002_1	false
1745	WP_030578068_9013	false
1746	WP_073444401_9006	false
1747	WP_067348529_9005	false
1748	WP_014690715_9002	false
1749	WP_093656413_2	false
1750	WP_051709136_3	false
1751	WP_067348529_9006	false
1752	WP_131097488_2	false
1753	QBI53056_9006	false
1754	WP_120727774_9003	false
1755	OLO57000_9001	false
1756	OLO56996_1	false
1757	WP_131097488_1	false
1758	WP_124934048_2	false
1759	EJJ05683_1	false
1760	WP_073444401_9009	false
1761	WP_030578068_9010	false
1762	WP_124934052_9002	false
1763	WP_086561060_1	false
1764	AKJ11412_1	false
1765	WP_086561055_9001	false
1766	WP_131102102_9005	false
1767	WP_067348529_9007	false
1768	QBI53056_9003	false
1769	WP_131965735_1	false
1770	WP_020218384_1	false
1771	WP_062428470_1	false
1772	WP_131965734_1	false
1773	WP_030455411_1	false
1774	WP_113982325_1	false
1775	WP_061300719_2	false
1776	WP_030172139_2	false
1777	WP_111862862_2	false
1778	WP_093170892_4	false
1779	WP_062343135_1	false
1780	WP_030455409_1	false
1781	WP_062428474_1	false
1782	WP_061300720_2	false
1783	WP_111169117_3	false
1784	WP_093170943_2	false
1785	WP_116026137_3	false
1786	WP_061300721_2	false
1787	WP_132388264_2	false
1788	WP_113982324_1	false
1789	SDH11838_4	false
1790	WP_030455410_1	false
1791	WP_116026136_3	false
1792	WP_062428472_1	false
1793	WP_132388266_2	false
1794	WP_062343137_1	false
1795	WP_117401160_2	false
1796	WP_132268319_2	false
1797	WP_111862863_2	false
1798	WP_030172142_2	false
1799	WP_117401161_2	false
1800	WP_132268317_2	false
1801	WP_020218383_1	false
1802	WP_065848698_1	false
1803	WP_039653092_1	false
1804	BAN83923_2	false
1805	WP_043911856_1	false
1806	WP_073735916_2	false
1807	WP_124271723_2	false
1808	RPK69291_2	false
1809	WP_061988205_1	false
1810	WP_076159164_4	false
1811	WP_035804978_2	false
1812	WP_073483171_2	false
1813	WP_031052551_1	false
1814	WP_130877472_3	false
1815	WP_107105767_1	false
1816	WP_116209352_2	false
1817	WP_127149214_3	false
1818	WP_046930162_5	false
1819	WP_123082011_3	false
1820	WP_023544308_2	false
1821	WP_078859808_4	false
1822	WP_073787016_1	false
1823	WP_125511014_1	false
1824	WP_127176619_1	false
1825	WP_128508010_2	false
1826	WP_081983063_6	false
1827	WP_078593643_1	false
1828	WP_115912935_2	false
1829	WP_099282405_1	false
1830	WP_093545912_1	false
1831	WP_106236748_1	false
1832	WP_091117929_1	false
1833	WP_071375573_1	false
1834	WP_030193566_1	false
1835	WP_017595616_2	false
1836	WP_018962008_1	false
1837	WP_131980226_1	false
1838	WP_027655653_1	false
1839	WP_101404757_4	false
1840	WP_086861034_3	false
1841	WP_028441277_4	false
1842	WP_086702179_2	false
1843	WP_101385752_2	false
1844	WP_103341360_4	false
1845	WP_057608322_2	false
1846	PKV33869_4	false
1847	WP_030570393_2	false
1848	WP_129292093_3	false
1849	WP_134664144_3	false
1850	RED74809_5	false
1851	WP_116154877_5	false
1852	WP_018522479_4	false
1853	WP_023550873_8	false
1854	WP_087885333_3	false
1855	WP_059190156_3	false
1856	WP_097276114_2	false
1857	WP_111415595_2	false
1858	WP_131735418_3	false
1859	WP_030040480_3	false
1860	WP_037881970_1	false
1861	WP_088799362_1	false
1862	WP_053747924_2	false
1863	WP_123074529_6	false
1864	WP_057611617_6	false
1865	WP_018568344_1	false
1866	WP_006347379_2	false
1867	WP_023554016_2	false
1868	WP_030065831_1	false
1869	WP_093603917_1	false
1870	WP_007495061_2	false
1871	GAQ65395_3	false
1872	WP_059082757_2	false
1873	WP_086861034_1	false
1874	WP_099279259_2	false
1875	WP_078971081_2	false
1876	WP_124286732_5	false
1877	WP_107308000_3	false
1878	WP_053676554_4	false
1879	OIJ88146_3	false
1880	WP_094009173_3	false
1881	WP_079177123_3	false
1882	KPC62607_2	false
1883	WP_005477225_2	false
1884	WP_099887535_4	false
1885	WP_085671318_2	false
1886	WP_085671453_2	false
1887	VDM88753_2	false
1888	WP_083115866_3	false
1889	WP_085671380_1	false
1890	EGB29232_2	false
1891	WP_065164254_3	false
1892	CFR67737_1	false
1893	EGE49931_2	false
1894	WP_085673955_2	false
1895	WP_085670073_3	false
1896	ORW98956_1	false
1897	KCR02833_2	false
1898	ORA12704_3	false
1899	WP_085673083_1	false
1900	COV81994_3	false
1901	COV23412_2	false
1902	WP_086155057_2	false
1903	AKR01079_2	false
1904	OOK83994_3	false
1905	WP_122530149_2	false
1906	WP_051490166_1	false
1907	WP_083102943_2	false
1908	EUA05503_2	false
1909	WP_085252934_2	false
1910	WP_085105271_2	false
1911	WP_083115648_2	false
1912	WP_031737334_2	false
1913	WP_023370892_2	false
1914	OOK66964_1	false
1915	WP_085673955_3	false
1916	WP_085673959_2	false
1917	WP_085670625_2	false
1918	WP_083113299_3	false
1919	WP_065136618_3	false
1920	COV92604_2	false
1921	WP_075911259_2	false
1922	CFS33831_2	false
1923	KAU25380_2	false
1924	WP_083115253_1	false
1925	ORC04864_1	false
1926	WP_082275447_2	false
1927	ODR23958_5	false
1928	AUS50474_3	false
1929	CKX97298_2	false
1930	WP_067240547_1	false
1931	WP_065136618_2	false
1932	SGD85762_2	false
1933	WP_085670073_2	false
1934	WP_085249702_4	false
1935	WP_079099227_2	false
1936	WP_122441228_2	false
1937	WP_065136618_4	false
1938	WP_083271029_3	false
1939	WP_133437797_3	false
1940	WP_085160326_2	false
1941	WP_085323284_3	false
1942	WP_055578070_4	false
1943	WP_023370892_3	false
1944	OOK66964_3	false
1945	EUA04475_2	false
1946	OOK63274_3	false
1947	OOK63274_4	false
1948	WP_063469930_1	false
1949	WP_085250966_3	false
1950	EUA04475_1	false
1951	WP_085673959_1	false
1952	ODR23958_3	false
1953	ODR23958_4	false
1954	OMC50887_2	false
1955	WP_083271029_5	false
1956	OMC41183_2	false
1957	WP_083271029_4	false
1958	WP_083046415_2	false
1959	RUP01435_4	false
1960	WP_083679341_2	false
1961	WP_018500447_3	false
1962	WP_082115047_1	false
1963	WP_107778339_2	false
1964	WP_091325076_3	false
1965	WP_129283158_5	false
1966	WP_125792333_2	false
1967	SFK92414_2	false
1968	WP_093601012_3	false
1969	WP_129176857_2	false
1970	WP_015618321_4	false
1971	WP_015618321_6	false
1972	WP_127571148_2	false
1973	WP_097165202_3	false
1974	WP_026542026_1	false
1975	WP_107778338_2	false
1976	WP_028265499_2	false
1977	WP_031072263_3	false
1978	WP_043470682_3	false
1979	AFR30485_2	false
1980	WP_043470682_2	false
1981	WP_015618321_3	false
1982	WP_076825825_3	false
1983	WP_091273394_1	false
1984	WP_076825825_1	false
1985	WP_091273394_3	false
1986	WP_031072263_6	false
1987	WP_015618321_7	false
1988	WP_131746916_2	false
1989	WP_018500447_4	false
1990	WP_031072263_2	false
1991	WP_104263679_5	false
1992	WP_097165202_5	false
1993	WP_091470208_1	false
1994	WP_105691909_2	false
1995	WP_094737915_2	false
1996	WP_089596247_3	false
1997	WP_091470208_3	false
1998	WP_078909294_3	false
1999	WP_015618321_2	false
2000	WP_031012255_5	false
2001	WP_129176857_4	false
2002	WP_129283158_4	false
2003	WP_091273394_2	false
2004	WP_091273394_5	false
2005	WP_031072263_4	false
2006	WP_116246380_4	false
2007	WP_061783869_3	false
2008	WP_062071474_3	false
2009	WP_028265499_3	false
2010	WP_024818115_2	false
2011	WP_116246380_3	false
2012	WP_078909294_2	false
2013	WP_121405200_1	false
2014	WP_061783869_4	false
2015	WP_057576508_1	false
2016	WP_107442966_2	false
2017	WP_107442966_1	false
2018	WP_089596247_2	false
2019	WP_091325076_1	false
2020	WP_128397239_3	false
2021	WP_091470208_2	false
2022	WP_043470682_1	false
2023	WP_031216848_1	false
2024	WP_062071474_2	false
2025	AOY69839_2	false
2026	WP_031216848_2	false
2027	WP_091325076_2	false
2028	WP_062097999_2	false
2029	SCZ59071_1	false
2030	SCZ59071_2	false
2031	WP_105691909_1	false
2032	WP_097165202_4	false
2033	AFR30485_3	false
2034	WP_026542026_2	false
2035	WP_105691909_3	false
2036	WP_062071474_1	false
2037	SCZ59071_3	false
2038	WP_127571148_4	false
2039	WP_031012255_2	false
2040	WP_104263679_4	false
2041	WP_055478352_3	false
2042	WP_061783869_2	false
2043	WP_061783869_5	false
2044	WP_107442966_3	false
2045	WP_076825825_4	false
2046	WP_057576508_2	false
2047	WP_094737915_3	false
2048	WP_062097999_3	false
2049	AOY69839_1	false
2050	WP_026542026_3	false
2051	AFR30485_1	false
2052	WP_076045700_2	false
2053	WP_031012255_3	false
2054	WP_060180042_3	false
2055	WP_116246380_2	false
2056	WP_061783869_6	false
2057	WP_055478352_2	false
[truncated: 496 more rows]
