# Supplementary material for: Discovery and characterisation of an amidine-containing ribosomally-synthesised peptide that is widely distributed in nature
Source: Royal Society of Chemistry journal article supplement (doi:10.1039/d1sc01456k), 2021-01-01
Supplement: d1sc01456k2.cys [file d1sc01456k2.cys › CytoscapeSession-2019_12_19-13_30/tables/36-cc_1.to.494.txt/SHARED_ATTRS-org.cytoscape.model.CyEdge-36+shared+edge.cytable]

CyCSV-Version	1
SUID	canonicalName	EVALUE	HIT%ID	MIN_COV_OPT	shared interaction	shared name	SS%ID
java.lang.Long	java.lang.String	java.lang.Double	java.lang.Double	java.lang.Integer	java.lang.String	java.lang.String	java.lang.Double
	mutable	mutable	mutable	mutable			mutable
36 shared edge
2554	PWF27333_2 (pp) WP_133246044_2	39.0	100.0	1	pp	PWF27333_2 (pp) WP_133246044_2	100.0
2555	SEC29390_2 (pp) WP_066215709_2	66.0	100.0	1	pp	SEC29390_2 (pp) WP_066215709_2	100.0
2556	PDQ36095_3 (pp) PDQ36093_4	62.0	100.0	1	pp	PDQ36095_3 (pp) PDQ36093_4	100.0
2557	WP_104181080_3 (pp) WP_105032337_3	63.0	91.346	1	pp	WP_104181080_3 (pp) WP_105032337_3	91.35
2558	WP_107778339_3 (pp) WP_107778338_3	60.0	100.0	1	pp	WP_107778339_3 (pp) WP_107778338_3	100.0
2559	COV81994_2 (pp) AGL26862_1	67.0	100.0	1	pp	COV81994_2 (pp) AGL26862_1	100.0
2560	WP_090039557_6 (pp) WP_083091741_1	8.0	54.545	1	pp	WP_090039557_6 (pp) WP_083091741_1	52.94
2561	WP_073452776_1 (pp) WP_017177815_2	46.0	91.549	1	pp	WP_073452776_1 (pp) WP_017177815_2	91.55
2562	WP_084580442_1 (pp) REH37226_1	38.0	71.591	1	pp	WP_084580442_1 (pp) REH37226_1	69.23
2563	WP_103341360_1 (pp) WP_131735418_1	47.0	76.136	1	pp	WP_103341360_1 (pp) WP_131735418_1	76.14
2564	WP_131785730_4 (pp) WP_131785729_4	57.0	100.0	1	pp	WP_131785730_4 (pp) WP_131785729_4	100.0
2565	WP_123601959_4 (pp) WP_123601960_4	62.0	100.0	1	pp	WP_123601959_4 (pp) WP_123601960_4	100.0
2566	WP_053619387_1 (pp) WP_121183327_1	33.0	89.091	1	pp	WP_053619387_1 (pp) WP_121183327_1	87.5
2567	WP_095563712_3 (pp) WP_095563712_2	35.0	54.902	1	pp	WP_095563712_3 (pp) WP_095563712_2	54.9
2568	OKH95170_3 (pp) WP_073785992_3	55.0	100.0	1	pp	OKH95170_3 (pp) WP_073785992_3	100.0
2569	WP_126382826_3 (pp) WP_126382827_4	43.0	100.0	1	pp	WP_126382826_3 (pp) WP_126382827_4	100.0
2570	WP_083609312_2 (pp) OKI12399_2	57.0	100.0	1	pp	WP_083609312_2 (pp) OKI12399_2	100.0
2571	WP_121405200_3 (pp) WP_100045344_3	7.0	76.19	1	pp	WP_121405200_3 (pp) WP_100045344_3	69.56
2572	AXK36692_2 (pp) AXK36690_3	50.0	100.0	1	pp	AXK36692_2 (pp) AXK36690_3	100.0
2573	WP_116026136_1 (pp) WP_116026137_1	77.0	100.0	1	pp	WP_116026136_1 (pp) WP_116026137_1	100.0
2574	WP_111334328_1 (pp) PKV33869_5	38.0	57.407	1	pp	WP_111334328_1 (pp) PKV33869_5	58.49
2575	WP_085670625_1 (pp) WP_083113299_2	49.0	86.42	1	pp	WP_085670625_1 (pp) WP_083113299_2	86.42
2576	WP_075410821_2 (pp) WP_081384789_3	63.0	100.0	1	pp	WP_075410821_2 (pp) WP_081384789_3	100.0
2577	WP_035849420_7 (pp) WP_035849418_4	62.0	100.0	1	pp	WP_035849420_7 (pp) WP_035849418_4	100.0
2578	RED74809_3 (pp) WP_116154877_3	67.0	100.0	1	pp	RED74809_3 (pp) WP_116154877_3	100.0
2579	WP_018962008_5 (pp) WP_018962008_8	40.0	100.0	1	pp	WP_018962008_5 (pp) WP_018962008_8	100.0
2580	WP_065164254_4 (pp) WP_061921822_1	0.11	47.619	0	pp	WP_065164254_4 (pp) WP_061921822_1	40.0
2581	WP_125807935_1 (pp) RSM56874_1	40.0	100.0	1	pp	WP_125807935_1 (pp) RSM56874_1	100.0
2582	WP_111862863_1 (pp) WP_111862862_1	79.0	100.0	1	pp	WP_111862863_1 (pp) WP_111862862_1	100.0
2583	WP_086858376_4 (pp) WP_086858376_3	7.0	70.732	1	pp	WP_086858376_4 (pp) WP_086858376_3	70.73
2584	WP_076045700_1 (pp) WP_060180042_2	44.0	100.0	1	pp	WP_076045700_1 (pp) WP_060180042_2	100.0
2585	WP_081707409_1 (pp) ERK54887_1	36.0	100.0	1	pp	WP_081707409_1 (pp) ERK54887_1	100.0
2586	WP_097165202_2 (pp) WP_104263679_3	26.0	55.556	1	pp	WP_097165202_2 (pp) WP_104263679_3	55.56
2587	WP_040899039_1 (pp) EJJ05688_1	70.0	100.0	1	pp	WP_040899039_1 (pp) EJJ05688_1	100.0
2588	WP_079180155_3 (pp) SGI74060_3	28.0	100.0	1	pp	WP_079180155_3 (pp) SGI74060_3	100.0
2589	WP_082115066_2 (pp) KJK44488_2	79.0	100.0	1	pp	WP_082115066_2 (pp) KJK44488_2	100.0
2590	WP_053729790_4 (pp) WP_053729792_4	27.0	100.0	1	pp	WP_053729790_4 (pp) WP_053729792_4	100.0
2591	OJV24808_1 (pp) OJV24806_2	43.0	100.0	1	pp	OJV24808_1 (pp) OJV24806_2	100.0
2592	WP_116154877_2 (pp) RED74809_2	54.0	100.0	1	pp	WP_116154877_2 (pp) RED74809_2	100.0
2593	WP_091674323_2 (pp) SFB39971_2	23.0	100.0	1	pp	WP_091674323_2 (pp) SFB39971_2	100.0
2594	KZE98020_3 (pp) WP_045196822_3	46.0	80.0	1	pp	KZE98020_3 (pp) WP_045196822_3	80.0
2595	AFJ68075_2 (pp) WP_067908345_2	0.095	52.381	0	pp	AFJ68075_2 (pp) WP_067908345_2	42.31
2596	WP_054046275_1 (pp) EWC60518_2	14.0	58.824	1	pp	WP_054046275_1 (pp) EWC60518_2	44.78
2597	WP_094002561_2 (pp) WP_116110588_2	24.0	100.0	1	pp	WP_094002561_2 (pp) WP_116110588_2	100.0
2598	WP_059082757_1 (pp) GAQ65395_1	63.0	100.0	1	pp	WP_059082757_1 (pp) GAQ65395_1	100.0
2599	WP_054049769_2 (pp) WP_091371144_1	36.0	66.667	1	pp	WP_054049769_2 (pp) WP_091371144_1	65.93
2600	WP_053729792_3 (pp) WP_053729790_3	83.0	100.0	1	pp	WP_053729792_3 (pp) WP_053729790_3	100.0
2601	WP_083753877_1 (pp) ONI75210_1	83.0	100.0	1	pp	WP_083753877_1 (pp) ONI75210_1	100.0
2602	WP_042407643_4 (pp) WP_042407643_3	14.0	100.0	1	pp	WP_042407643_4 (pp) WP_042407643_3	100.0
2603	WP_027737671_1 (pp) WP_027737668_1	76.0	100.0	1	pp	WP_027737671_1 (pp) WP_027737668_1	100.0
2604	WP_086461443_2 (pp) WP_086461444_2	55.0	100.0	1	pp	WP_086461443_2 (pp) WP_086461444_2	100.0
2605	WP_080564860_3 (pp) WP_083982727_2	0.39	52.174	0	pp	WP_080564860_3 (pp) WP_083982727_2	44.44
2606	KPI20077_2 (pp) WP_054213495_2	48.0	100.0	1	pp	KPI20077_2 (pp) WP_054213495_2	100.0
2607	WP_054569301_1 (pp) WP_018637157_1	71.0	92.373	1	pp	WP_054569301_1 (pp) WP_018637157_1	91.6
2608	WP_090039557_3 (pp) WP_064110435_3	44.0	87.0	1	pp	WP_090039557_3 (pp) WP_064110435_3	87.0
2609	WP_082320087_1 (pp) EPJ34556_2	30.0	100.0	1	pp	WP_082320087_1 (pp) EPJ34556_2	100.0
2610	WP_082115066_1 (pp) KJK44488_1	58.0	100.0	1	pp	WP_082115066_1 (pp) KJK44488_1	100.0
2611	OXL32905_1 (pp) WP_089507734_1	45.0	100.0	1	pp	OXL32905_1 (pp) WP_089507734_1	100.0
2612	WP_081323045_1 (pp) KTR94659_1	34.0	100.0	1	pp	WP_081323045_1 (pp) KTR94659_1	100.0
2613	EFL12569_1 (pp) WP_078561279_1	68.0	100.0	1	pp	EFL12569_1 (pp) WP_078561279_1	100.0
2614	SFD04819_1 (pp) WP_028567914_2	20.0	79.487	1	pp	SFD04819_1 (pp) WP_028567914_2	59.62
2615	WP_097276114_3 (pp) SDE31545_3	20.0	41.111	1	pp	WP_097276114_3 (pp) SDE31545_3	42.53
2616	OKL50794_1 (pp) WP_124913393_2	23.0	100.0	1	pp	OKL50794_1 (pp) WP_124913393_2	100.0
2617	WP_098744376_1 (pp) SBT66104_1	56.0	98.81	1	pp	WP_098744376_1 (pp) SBT66104_1	98.81
2618	EEZ91469_3 (pp) WP_004017479_2	57.0	100.0	1	pp	EEZ91469_3 (pp) WP_004017479_2	100.0
2619	WP_107004474_2 (pp) WP_066216109_1	61.0	98.925	1	pp	WP_107004474_2 (pp) WP_066216109_1	97.87
2620	WP_086513413_2 (pp) WP_086513414_2	80.0	100.0	1	pp	WP_086513413_2 (pp) WP_086513414_2	100.0
2621	WP_123603612_3 (pp) WP_033342998_1	21.0	79.545	1	pp	WP_123603612_3 (pp) WP_033342998_1	79.55
2622	WP_084011357_3 (pp) WP_045877303_3	61.0	100.0	1	pp	WP_084011357_3 (pp) WP_045877303_3	100.0
2623	WP_051751858_2 (pp) WP_131736173_1	9.0	55.0	1	pp	WP_051751858_2 (pp) WP_131736173_1	41.51
2624	WP_121394015_3 (pp) WP_092779820_3	37.0	100.0	1	pp	WP_121394015_3 (pp) WP_092779820_3	100.0
2625	RPF24868_1 (pp) WP_123971014_1	76.0	100.0	1	pp	RPF24868_1 (pp) WP_123971014_1	100.0
2626	WP_064282747_1 (pp) KKF03247_1	30.0	100.0	1	pp	WP_064282747_1 (pp) KKF03247_1	100.0
2627	WP_081907113_2 (pp) WP_073387576_3	4.0	42.5	1	pp	WP_081907113_2 (pp) WP_073387576_3	45.95
2628	EXG81129_3 (pp) WP_035861760_3	32.0	100.0	1	pp	EXG81129_3 (pp) WP_035861760_3	100.0
2629	WP_073785992_1 (pp) OKH95170_1	54.0	100.0	1	pp	WP_073785992_1 (pp) OKH95170_1	100.0
2630	WP_111209344_2 (pp) SBN62121_1	35.0	54.206	1	pp	WP_111209344_2 (pp) SBN62121_1	53.21
2631	WP_009951067_1 (pp) CAM04239_1	52.0	100.0	1	pp	WP_009951067_1 (pp) CAM04239_1	100.0
2632	SDN00667_1 (pp) WP_090014707_1	65.0	100.0	1	pp	SDN00667_1 (pp) WP_090014707_1	100.0
2633	WP_101557151_2 (pp) WP_101557149_2	39.0	100.0	1	pp	WP_101557151_2 (pp) WP_101557149_2	100.0
2634	EFF80328_2 (pp) WP_082163142_2	43.0	72.043	1	pp	EFF80328_2 (pp) WP_082163142_2	72.04
2635	AKJ11407_3 (pp) AKJ11412_3	23.0	100.0	1	pp	AKJ11407_3 (pp) AKJ11412_3	100.0
2636	WP_094931980_1 (pp) WP_124799873_2	21.0	44.086	1	pp	WP_094931980_1 (pp) WP_124799873_2	44.09
2637	RKS80725_2 (pp) WP_121191582_2	48.0	100.0	1	pp	RKS80725_2 (pp) WP_121191582_2	100.0
2638	WP_049566251_1 (pp) WP_100806338_1	61.0	80.909	1	pp	WP_049566251_1 (pp) WP_100806338_1	79.46
2639	WP_091040567_4 (pp) SDE51953_3	30.0	100.0	1	pp	WP_091040567_4 (pp) SDE51953_3	100.0
2640	WP_122198059_2 (pp) WP_117355837_2	16.0	55.882	1	pp	WP_122198059_2 (pp) WP_117355837_2	59.37
2641	WP_079611677_2 (pp) WP_100521517_2	69.0	92.157	1	pp	WP_079611677_2 (pp) WP_100521517_2	83.93
2642	WP_083597719_1 (pp) SFO39709_1	75.0	100.0	1	pp	WP_083597719_1 (pp) SFO39709_1	100.0
2643	WP_124441159_1 (pp) GCB48186_1	17.0	100.0	1	pp	WP_124441159_1 (pp) GCB48186_1	100.0
2644	WP_084580442_2 (pp) EWM17971_1	30.0	100.0	1	pp	WP_084580442_2 (pp) EWM17971_1	100.0
2645	WP_040899039_2 (pp) EJJ05688_2	34.0	100.0	1	pp	WP_040899039_2 (pp) EJJ05688_2	100.0
2646	WP_126382826_1 (pp) WP_126382827_1	70.0	100.0	1	pp	WP_126382826_1 (pp) WP_126382827_1	100.0
2647	WP_052396081_2 (pp) EWM18075_2	25.0	100.0	1	pp	WP_052396081_2 (pp) EWM18075_2	100.0
2648	ORC04864_2 (pp) WP_082275447_3	74.0	100.0	1	pp	ORC04864_2 (pp) WP_082275447_3	100.0
2649	WP_071129084_3 (pp) WP_122819575_2	0.009	60.0	0	pp	WP_071129084_3 (pp) WP_122819575_2	54.55
2650	EWM18075_1 (pp) WP_052396081_1	67.0	100.0	1	pp	EWM18075_1 (pp) WP_052396081_1	100.0
2651	WP_059190156_1 (pp) WP_097276114_1	47.0	96.154	1	pp	WP_059190156_1 (pp) WP_097276114_1	94.94
2652	WP_083715654_1 (pp) ONF71727_1	86.0	100.0	1	pp	WP_083715654_1 (pp) ONF71727_1	100.0
2653	WP_030172142_1 (pp) WP_030172139_1	51.0	100.0	1	pp	WP_030172142_1 (pp) WP_030172139_1	100.0
2654	WP_092779820_2 (pp) WP_121394015_2	48.0	100.0	1	pp	WP_092779820_2 (pp) WP_121394015_2	100.0
2655	WP_092533827_1 (pp) WP_067908345_1	15.0	58.571	1	pp	WP_092533827_1 (pp) WP_067908345_1	53.95
2656	WP_086861034_2 (pp) WP_079054543_2	9.6	40.625	0	pp	WP_086861034_2 (pp) WP_079054543_2	48.15
2657	WP_091159224_2 (pp) SDY68794_2	52.0	100.0	1	pp	WP_091159224_2 (pp) SDY68794_2	100.0
2658	SEC38602_1 (pp) WP_126898321_1	75.0	93.636	1	pp	SEC38602_1 (pp) WP_126898321_1	93.64
2659	SIK72068_5 (pp) WP_083019015_3	32.0	100.0	1	pp	SIK72068_5 (pp) WP_083019015_3	100.0
2660	WP_123601959_3 (pp) WP_123601960_3	33.0	100.0	1	pp	WP_123601959_3 (pp) WP_123601960_3	100.0
2661	WP_083597223_2 (pp) SFN21853_3	23.0	100.0	1	pp	WP_083597223_2 (pp) SFN21853_3	100.0
2662	WP_093544729_3 (pp) SCD31130_3	39.0	100.0	1	pp	WP_093544729_3 (pp) SCD31130_3	100.0
2663	PDQ36093_6 (pp) PDQ36095_5	60.0	100.0	1	pp	PDQ36093_6 (pp) PDQ36095_5	100.0
2664	WP_084692311_7 (pp) WP_084692314_5	67.0	100.0	1	pp	WP_084692311_7 (pp) WP_084692314_5	100.0
2665	WP_079182634_2 (pp) OKI46856_2	27.0	100.0	1	pp	WP_079182634_2 (pp) OKI46856_2	100.0
2666	WP_120571834_2 (pp) WP_120571833_2	46.0	100.0	1	pp	WP_120571834_2 (pp) WP_120571833_2	100.0
2667	OJH69022_1 (pp) WP_030288747_1	70.0	100.0	1	pp	OJH69022_1 (pp) WP_030288747_1	100.0
2668	WP_053729792_1 (pp) WP_053729790_1	46.0	100.0	1	pp	WP_053729792_1 (pp) WP_053729790_1	100.0
2669	WP_058846818_2 (pp) WP_037658204_2	39.0	100.0	1	pp	WP_058846818_2 (pp) WP_037658204_2	100.0
2670	WP_083191919_6 (pp) KOG82578_7	65.0	98.958	1	pp	WP_083191919_6 (pp) KOG82578_7	98.96
2671	SDN00667_3 (pp) WP_090014707_3	59.0	100.0	1	pp	SDN00667_3 (pp) WP_090014707_3	100.0
2672	WP_084692311_5 (pp) WP_084692314_3	26.0	100.0	1	pp	WP_084692311_5 (pp) WP_084692314_3	100.0
2673	PDQ36093_2 (pp) PDQ36095_1	53.0	100.0	1	pp	PDQ36093_2 (pp) PDQ36095_1	100.0
2674	KLO64220_3 (pp) WP_082128669_1	75.0	100.0	1	pp	KLO64220_3 (pp) WP_082128669_1	100.0
2675	WP_052129072_2 (pp) WP_080754833_2	80.0	100.0	1	pp	WP_052129072_2 (pp) WP_080754833_2	100.0
2676	WP_084523472_2 (pp) WP_067823333_3	69.0	100.0	1	pp	WP_084523472_2 (pp) WP_067823333_3	100.0
2677	WP_054213495_1 (pp) KPI20077_1	47.0	100.0	1	pp	WP_054213495_1 (pp) KPI20077_1	100.0
2678	WP_110911190_4 (pp) WP_111209344_3	25.0	90.698	1	pp	WP_110911190_4 (pp) WP_111209344_3	90.7
2679	PKV30436_1 (pp) WP_101368245_1	34.0	100.0	1	pp	PKV30436_1 (pp) WP_101368245_1	100.0
2680	OJV25031_3 (pp) OJV25031_2	16.0	82.353	0	pp	OJV25031_3 (pp) OJV25031_2	54.9
2681	WP_111166051_3 (pp) WP_067972339_3	67.0	80.87	1	pp	WP_111166051_3 (pp) WP_067972339_3	80.87
2682	SDQ22037_1 (pp) WP_092862843_1	77.0	100.0	1	pp	SDQ22037_1 (pp) WP_092862843_1	100.0
2683	WP_090014707_4 (pp) SDN00667_4	45.0	100.0	1	pp	WP_090014707_4 (pp) SDN00667_4	100.0
2684	OLB80605_4 (pp) WP_116200011_3	9.8	52.174	0	pp	OLB80605_4 (pp) WP_116200011_3	52.17
2685	WP_123601959_1 (pp) WP_123601960_1	85.0	100.0	1	pp	WP_123601959_1 (pp) WP_123601960_1	100.0
2686	WP_040887728_3 (pp) EMF02011_3	54.0	100.0	1	pp	WP_040887728_3 (pp) EMF02011_3	100.0
2687	WP_130451801_2 (pp) WP_123074529_2	51.0	71.875	1	pp	WP_130451801_2 (pp) WP_123074529_2	71.88
2688	WP_052499830_2 (pp) WP_062760655_3	18.0	96.875	1	pp	WP_052499830_2 (pp) WP_062760655_3	96.88
2689	WP_119286192_3 (pp) WP_030578068_2	39.0	95.082	1	pp	WP_119286192_3 (pp) WP_030578068_2	95.08
2690	WP_078561279_3 (pp) EFL12569_2	84.0	100.0	1	pp	WP_078561279_3 (pp) EFL12569_2	100.0
2691	PZS01282_1 (pp) WP_134128179_1	30.0	85.714	1	pp	PZS01282_1 (pp) WP_134128179_1	84.0
2692	WP_037862255_1 (pp) WP_063758854_1	38.0	100.0	1	pp	WP_037862255_1 (pp) WP_063758854_1	100.0
2693	WP_131102102_1 (pp) QBI53056_1	42.0	100.0	1	pp	WP_131102102_1 (pp) QBI53056_1	100.0
2694	WP_119835460_1 (pp) WP_120205519_1	40.0	100.0	1	pp	WP_119835460_1 (pp) WP_120205519_1	100.0
2695	WP_084415931_3 (pp) AND16936_3	74.0	98.148	1	pp	WP_084415931_3 (pp) AND16936_3	98.15
2696	WP_129587643_3 (pp) WP_080654621_1	12.0	71.429	1	pp	WP_129587643_3 (pp) WP_080654621_1	55.56
2697	SEH00212_2 (pp) WP_084415984_1	24.0	42.609	1	pp	SEH00212_2 (pp) WP_084415984_1	44.14
2698	WP_112443292_2 (pp) WP_071934999_1	24.0	43.75	1	pp	WP_112443292_2 (pp) WP_071934999_1	43.75
2699	WP_012086849_1 (pp) WP_023550873_2	37.0	77.5	1	pp	WP_012086849_1 (pp) WP_023550873_2	72.09
2700	WP_018962008_4 (pp) WP_018962008_7	41.0	100.0	1	pp	WP_018962008_4 (pp) WP_018962008_7	100.0
2701	WP_078515914_2 (pp) WP_028427539_3	13.0	100.0	1	pp	WP_078515914_2 (pp) WP_028427539_3	100.0
2702	WP_090039557_2 (pp) WP_064110435_2	64.0	98.936	1	pp	WP_090039557_2 (pp) WP_064110435_2	98.94
2703	RKT76768_1 (pp) WP_121030237_1	70.0	100.0	1	pp	RKT76768_1 (pp) WP_121030237_1	100.0
2704	WP_092862843_2 (pp) SDQ22037_2	74.0	100.0	1	pp	WP_092862843_2 (pp) SDQ22037_2	100.0
2705	WP_083715657_1 (pp) ONF71729_1	65.0	100.0	1	pp	WP_083715657_1 (pp) ONF71729_1	100.0
2706	RKT36058_3 (pp) WP_121148667_2	35.0	100.0	1	pp	RKT36058_3 (pp) WP_121148667_2	100.0
2707	WP_116110588_1 (pp) WP_094002561_1	51.0	100.0	1	pp	WP_116110588_1 (pp) WP_094002561_1	100.0
2708	KIE24863_3 (pp) WP_052318929_2	69.0	100.0	1	pp	KIE24863_3 (pp) WP_052318929_2	100.0
2709	SDR04557_1 (pp) WP_093264055_1	32.0	100.0	1	pp	SDR04557_1 (pp) WP_093264055_1	100.0
2710	SFN21853_1 (pp) WP_083597223_1	85.0	100.0	1	pp	SFN21853_1 (pp) WP_083597223_1	100.0
2711	SEE89807_2 (pp) WP_089774243_3	39.0	100.0	1	pp	SEE89807_2 (pp) WP_089774243_3	100.0
2712	OPF84252_1 (pp) WP_078841030_1	87.0	100.0	1	pp	OPF84252_1 (pp) WP_078841030_1	100.0
2713	KOG82578_6 (pp) KOU46944_4	45.0	100.0	1	pp	KOG82578_6 (pp) KOU46944_4	100.0
2714	WP_091114658_2 (pp) WP_093583210_5	18.0	77.273	0	pp	WP_091114658_2 (pp) WP_093583210_5	53.13
2715	PDQ36095_2 (pp) PDQ36093_3	64.0	100.0	1	pp	PDQ36095_2 (pp) PDQ36093_3	100.0
2716	SDG90099_2 (pp) WP_091067169_3	28.0	100.0	1	pp	SDG90099_2 (pp) WP_091067169_3	100.0
2717	WP_017177815_1 (pp) WP_073452776_2	66.0	84.956	1	pp	WP_017177815_1 (pp) WP_073452776_2	84.96
2718	WP_031027146_3 (pp) KPC95547_3	24.0	100.0	1	pp	WP_031027146_3 (pp) KPC95547_3	100.0
2719	OKJ94941_1 (pp) WP_084902797_2	15.0	100.0	1	pp	OKJ94941_1 (pp) WP_084902797_2	100.0
2720	WP_083982727_1 (pp) WP_114029352_1	32.0	60.0	1	pp	WP_083982727_1 (pp) WP_114029352_1	60.64
2721	WP_123971014_4 (pp) RPF24868_3	37.0	100.0	1	pp	WP_123971014_4 (pp) RPF24868_3	100.0
2722	WP_030578068_1 (pp) WP_119286192_2	73.0	99.02	1	pp	WP_030578068_1 (pp) WP_119286192_2	99.02
2723	PDQ36099_2 (pp) PDQ36095_4	50.0	100.0	1	pp	PDQ36099_2 (pp) PDQ36095_4	100.0
2724	KJK44488_3 (pp) WP_082115066_3	28.0	100.0	1	pp	KJK44488_3 (pp) WP_082115066_3	100.0
2725	QBI53056_9001 (pp) WP_131102102_9001	39.0	100.0	1	pp	QBI53056_9001 (pp) WP_131102102_9001	100.0
2726	WP_081453250_2 (pp) ACZ89043_2	56.0	100.0	1	pp	WP_081453250_2 (pp) ACZ89043_2	100.0
2727	SBT66104_2 (pp) WP_098744376_2	29.0	100.0	1	pp	SBT66104_2 (pp) WP_098744376_2	100.0
2728	OKL53160_3 (pp) WP_083603298_3	24.0	100.0	1	pp	OKL53160_3 (pp) WP_083603298_3	100.0
2729	OUE29607_1 (pp) OUE29606_1	44.0	100.0	1	pp	OUE29607_1 (pp) OUE29606_1	100.0
2730	WP_052038751_3 (pp) WP_076002756_3	19.0	54.545	1	pp	WP_052038751_3 (pp) WP_076002756_3	50.85
2731	KHK96352_2 (pp) WP_082008308_2	81.0	100.0	1	pp	KHK96352_2 (pp) WP_082008308_2	100.0
2732	EXG81129_2 (pp) WP_035861760_2	23.0	100.0	1	pp	EXG81129_2 (pp) WP_035861760_2	100.0
2733	WP_080968710_2 (pp) KMT47190_5	13.0	92.0	0	pp	WP_080968710_2 (pp) KMT47190_5	46.0
2734	WP_091073170_1 (pp) SEQ04975_1	48.0	76.068	1	pp	WP_091073170_1 (pp) SEQ04975_1	76.07
2735	WP_116708219_2 (pp) WP_133828511_2	38.0	96.552	1	pp	WP_116708219_2 (pp) WP_133828511_2	94.92
2736	WP_071042996_5 (pp) WP_071042994_4	65.0	100.0	1	pp	WP_071042996_5 (pp) WP_071042994_4	100.0
2737	WP_107308000_2 (pp) WP_033309246_2	29.0	72.414	1	pp	WP_107308000_2 (pp) WP_033309246_2	67.74
2738	ONF71729_2 (pp) WP_083715657_2	58.0	100.0	1	pp	ONF71729_2 (pp) WP_083715657_2	100.0
2739	OIJ88146_5 (pp) WP_079177123_5	51.0	100.0	1	pp	OIJ88146_5 (pp) WP_079177123_5	100.0
2740	WP_084580442_3 (pp) EWM17971_2	36.0	100.0	1	pp	WP_084580442_3 (pp) EWM17971_2	100.0
2741	WP_090073899_1 (pp) WP_082373216_1	36.0	62.857	1	pp	WP_090073899_1 (pp) WP_082373216_1	62.86
2742	OXL32905_2 (pp) WP_089507734_2	22.0	100.0	1	pp	OXL32905_2 (pp) WP_089507734_2	100.0
2743	WP_052311581_1 (pp) AEV84085_1	39.0	100.0	1	pp	WP_052311581_1 (pp) AEV84085_1	100.0
2744	WP_117401160_1 (pp) WP_117401161_1	86.0	100.0	1	pp	WP_117401160_1 (pp) WP_117401161_1	100.0
2745	BAM28031_2 (pp) WP_087454409_2	17.0	71.795	1	pp	BAM28031_2 (pp) WP_087454409_2	70.0
2746	GCB48186_2 (pp) WP_124441159_2	29.0	100.0	1	pp	GCB48186_2 (pp) WP_124441159_2	100.0
2747	ROS76630_1 (pp) WP_123307848_1	76.0	100.0	1	pp	ROS76630_1 (pp) WP_123307848_1	100.0
2748	EWC60518_1 (pp) WP_075973981_1	72.0	87.395	1	pp	EWC60518_1 (pp) WP_075973981_1	87.39
2749	WP_131785729_2 (pp) WP_131785730_2	46.0	100.0	1	pp	WP_131785729_2 (pp) WP_131785730_2	100.0
2750	WP_083115866_1 (pp) ORA12704_1	66.0	100.0	1	pp	WP_083115866_1 (pp) ORA12704_1	100.0
2751	PWK29583_3 (pp) WP_093610459_2	12.0	70.588	1	pp	PWK29583_3 (pp) WP_093610459_2	70.59
2752	WP_073704754_2 (pp) WP_077692191_1	41.0	69.697	1	pp	WP_073704754_2 (pp) WP_077692191_1	74.19
2753	WP_107778339_1 (pp) WP_107778338_1	63.0	100.0	1	pp	WP_107778339_1 (pp) WP_107778338_1	100.0
2754	WP_040887728_2 (pp) EMF02011_2	49.0	100.0	1	pp	WP_040887728_2 (pp) EMF02011_2	100.0
2755	WP_058846818_1 (pp) WP_037658204_1	28.0	85.185	1	pp	WP_058846818_1 (pp) WP_037658204_1	85.19
2756	WP_082163142_3 (pp) EFF80328_3	46.0	100.0	1	pp	WP_082163142_3 (pp) EFF80328_3	100.0
2757	OUE27579_3 (pp) OUE27580_3	23.0	100.0	1	pp	OUE27579_3 (pp) OUE27580_3	100.0
2758	SEH00212_3 (pp) SEH00207_9005	25.0	100.0	1	pp	SEH00212_3 (pp) SEH00207_9005	100.0
2759	WP_132186408_3 (pp) WP_132186409_3	11.0	100.0	1	pp	WP_132186408_3 (pp) WP_132186409_3	100.0
2760	OJH69022_5 (pp) WP_030288747_5	39.0	100.0	1	pp	OJH69022_5 (pp) WP_030288747_5	100.0
2761	SDR04557_2 (pp) WP_093264055_2	34.0	100.0	1	pp	SDR04557_2 (pp) WP_093264055_2	100.0
2762	RED74809_8 (pp) WP_116154877_8	64.0	100.0	1	pp	RED74809_8 (pp) WP_116154877_8	100.0
2763	AEB46035_1 (pp) WP_081476164_1	37.0	100.0	1	pp	AEB46035_1 (pp) WP_081476164_1	100.0
2764	WP_076002756_2 (pp) WP_020759490_1	17.0	96.667	1	pp	WP_076002756_2 (pp) WP_020759490_1	96.67
2765	WP_080564860_1 (pp) ERS23150_3	55.0	100.0	1	pp	WP_080564860_1 (pp) ERS23150_3	100.0
2766	OLF11310_1 (pp) OLF11310_2	12.0	65.854	1	pp	OLF11310_1 (pp) OLF11310_2	64.29
2767	WP_093357236_1 (pp) SFO40826_2	14.0	100.0	1	pp	WP_093357236_1 (pp) SFO40826_2	96.3
2768	WP_051268851_4 (pp) WP_026407791_2	14.0	100.0	0	pp	WP_051268851_4 (pp) WP_026407791_2	81.82
2769	CDM77002_1 (pp) AGC62644_2	75.0	99.065	1	pp	CDM77002_1 (pp) AGC62644_2	99.06
2770	WP_082057091_3 (pp) AJT41785_3	62.0	100.0	1	pp	WP_082057091_3 (pp) AJT41785_3	100.0
2771	WP_086845754_1 (pp) WP_038682890_1	42.0	56.075	1	pp	WP_086845754_1 (pp) WP_038682890_1	52.17
2772	RKT54190_1 (pp) WP_121005579_1	34.0	100.0	1	pp	RKT54190_1 (pp) WP_121005579_1	100.0
2773	SGI74060_2 (pp) WP_079180155_2	15.0	100.0	1	pp	SGI74060_2 (pp) WP_079180155_2	100.0
2774	WP_028441277_3 (pp) WP_007495061_3	35.0	62.136	1	pp	WP_028441277_3 (pp) WP_007495061_3	62.14
2775	WP_091073170_2 (pp) SEQ04975_2	45.0	87.179	1	pp	WP_091073170_2 (pp) SEQ04975_2	87.18
2776	KLO64220_5 (pp) WP_082128669_3	67.0	100.0	1	pp	KLO64220_5 (pp) WP_082128669_3	100.0
2777	WP_134664144_4 (pp) WP_112443341_1	49.0	73.109	1	pp	WP_134664144_4 (pp) WP_112443341_1	73.11
2778	KOV37396_1 (pp) WP_107094495_1	88.0	100.0	1	pp	KOV37396_1 (pp) WP_107094495_1	100.0
2779	WP_057611617_1 (pp) WP_057611617_2	30.0	77.143	1	pp	WP_057611617_1 (pp) WP_057611617_2	76.06
2780	WP_035849420_8 (pp) WP_035849418_5	65.0	100.0	1	pp	WP_035849420_8 (pp) WP_035849418_5	100.0
2781	WP_079177123_2 (pp) OIJ88146_2	78.0	100.0	1	pp	WP_079177123_2 (pp) OIJ88146_2	100.0
2782	WP_045196822_1 (pp) KZE98020_1	52.0	93.671	1	pp	WP_045196822_1 (pp) KZE98020_1	91.36
2783	WP_081384789_2 (pp) WP_075410821_1	37.0	100.0	1	pp	WP_081384789_2 (pp) WP_075410821_1	100.0
2784	WP_133246044_1 (pp) PWF27333_1	32.0	100.0	1	pp	WP_133246044_1 (pp) PWF27333_1	100.0
2785	ROS45991_3 (pp) WP_123292376_3	15.0	100.0	1	pp	ROS45991_3 (pp) WP_123292376_3	100.0
2786	WP_116154877_4 (pp) RED74809_4	60.0	100.0	1	pp	WP_116154877_4 (pp) RED74809_4	100.0
2787	WP_093603934_1 (pp) SFR28131_1	47.0	100.0	1	pp	WP_093603934_1 (pp) SFR28131_1	100.0
2788	SDL22458_2 (pp) WP_091051455_2	85.0	100.0	1	pp	SDL22458_2 (pp) WP_091051455_2	100.0
2789	KOG82578_5 (pp) WP_083191919_4	40.0	100.0	1	pp	KOG82578_5 (pp) WP_083191919_4	100.0
2790	OFK71393_3 (pp) WP_083296694_2	24.0	100.0	1	pp	OFK71393_3 (pp) WP_083296694_2	100.0
2791	WP_071042996_2 (pp) WP_071042994_2	43.0	100.0	1	pp	WP_071042996_2 (pp) WP_071042994_2	100.0
2792	WP_083752781_1 (pp) ONI88739_1	18.0	100.0	1	pp	WP_083752781_1 (pp) ONI88739_1	100.0
2793	OOC53575_2 (pp) WP_077689962_2	72.0	100.0	1	pp	OOC53575_2 (pp) WP_077689962_2	100.0
2794	WP_079177123_6 (pp) OIJ88146_6	70.0	100.0	1	pp	WP_079177123_6 (pp) OIJ88146_6	100.0
2795	CAM04239_5 (pp) WP_009951067_4	52.0	100.0	1	pp	CAM04239_5 (pp) WP_009951067_4	100.0
2796	OKH95170_2 (pp) WP_073785992_2	61.0	100.0	1	pp	OKH95170_2 (pp) WP_073785992_2	100.0
2797	PYE15898_2 (pp) WP_110470681_2	39.0	100.0	1	pp	PYE15898_2 (pp) WP_110470681_2	100.0
2798	WP_089774243_2 (pp) SEE89807_1	52.0	100.0	1	pp	WP_089774243_2 (pp) SEE89807_1	100.0
2799	WP_088261769_2 (pp) WP_088290452_2	21.0	85.366	1	pp	WP_088261769_2 (pp) WP_088290452_2	85.37
2800	WP_110050419_5 (pp) WP_017545560_2	26.0	100.0	1	pp	WP_110050419_5 (pp) WP_017545560_2	100.0
2801	WP_066216109_3 (pp) WP_107004474_3	18.0	90.625	1	pp	WP_066216109_3 (pp) WP_107004474_3	90.62
2802	RKT76768_3 (pp) WP_121030237_3	80.0	100.0	1	pp	RKT76768_3 (pp) WP_121030237_3	100.0
2803	WP_095563712_4 (pp) WP_073387576_1	48.0	91.781	1	pp	WP_095563712_4 (pp) WP_073387576_1	91.78
2804	WP_083752781_2 (pp) ONI88739_2	31.0	100.0	1	pp	WP_083752781_2 (pp) ONI88739_2	100.0
2805	WP_053676554_1 (pp) WP_094009173_1	72.0	94.495	1	pp	WP_053676554_1 (pp) WP_094009173_1	93.64
2806	WP_084692314_2 (pp) WP_084692311_4	64.0	100.0	1	pp	WP_084692314_2 (pp) WP_084692311_4	100.0
2807	WP_123292376_1 (pp) ROS45991_1	34.0	100.0	1	pp	WP_123292376_1 (pp) ROS45991_1	100.0
2808	OJV25031_1 (pp) OJV24806_1	50.0	100.0	1	pp	OJV25031_1 (pp) OJV24806_1	100.0
2809	CCB71037_2 (pp) WP_078590495_2	26.0	100.0	1	pp	CCB71037_2 (pp) WP_078590495_2	100.0
2810	WP_009951067_3 (pp) CAM04239_4	26.0	100.0	1	pp	WP_009951067_3 (pp) CAM04239_4	100.0
2811	WP_122198059_3 (pp) WP_062760655_1	4.7	44.444	0	pp	WP_122198059_3 (pp) WP_062760655_1	46.15
2812	WP_082008308_1 (pp) KHK96352_1	79.0	100.0	1	pp	WP_082008308_1 (pp) KHK96352_1	100.0
2813	WP_116026136_2 (pp) WP_116026137_2	55.0	100.0	1	pp	WP_116026136_2 (pp) WP_116026137_2	100.0
2814	WP_083603298_1 (pp) OKL53160_1	60.0	100.0	1	pp	WP_083603298_1 (pp) OKL53160_1	100.0
2815	WP_029068734_3 (pp) WP_053775070_1	24.0	42.609	1	pp	WP_029068734_3 (pp) WP_053775070_1	42.24
2816	EGY78124_2 (pp) ERS23150_2	30.0	100.0	1	pp	EGY78124_2 (pp) ERS23150_2	100.0
2817	WP_128397239_5 (pp) WP_062097999_5	39.0	100.0	1	pp	WP_128397239_5 (pp) WP_062097999_5	100.0
2818	WP_101557149_3 (pp) WP_101557151_3	11.0	100.0	1	pp	WP_101557149_3 (pp) WP_101557151_3	100.0
2819	KOG82578_2 (pp) WP_083191919_2	79.0	100.0	1	pp	KOG82578_2 (pp) WP_083191919_2	100.0
2820	WP_051458214_3 (pp) WP_046468711_1	21.0	70.909	1	pp	WP_051458214_3 (pp) WP_046468711_1	54.17
2821	WP_111166051_1 (pp) WP_067972339_1	60.0	76.852	1	pp	WP_111166051_1 (pp) WP_067972339_1	76.85
2822	WP_082508744_2 (pp) KQR47999_2	40.0	100.0	1	pp	WP_082508744_2 (pp) KQR47999_2	100.0
2823	ORA12704_2 (pp) WP_083115866_2	71.0	100.0	1	pp	ORA12704_2 (pp) WP_083115866_2	100.0
2824	PJJ46026_1 (pp) WP_100302197_1	27.0	100.0	1	pp	PJJ46026_1 (pp) WP_100302197_1	100.0
2825	WP_063274437_2 (pp) WP_112443292_6	18.0	56.25	1	pp	WP_063274437_2 (pp) WP_112443292_6	46.75
2826	WP_117355837_1 (pp) WP_122198059_1	29.0	92.063	1	pp	WP_117355837_1 (pp) WP_122198059_1	92.06
2827	WP_076825825_2 (pp) WP_091273394_4	40.0	84.211	1	pp	WP_076825825_2 (pp) WP_091273394_4	84.21
2828	WP_078841030_3 (pp) OPF84252_3	34.0	100.0	1	pp	WP_078841030_3 (pp) OPF84252_3	100.0
2829	ANS70161_3 (pp) AXG59058_3	47.0	100.0	1	pp	ANS70161_3 (pp) AXG59058_3	100.0
2830	RKT76768_2 (pp) WP_121030237_2	77.0	100.0	1	pp	RKT76768_2 (pp) WP_121030237_2	100.0
2831	WP_081453250_3 (pp) ACZ89043_4	40.0	100.0	1	pp	WP_081453250_3 (pp) ACZ89043_4	100.0
2832	WP_132170147_1 (pp) WP_132170149_1	57.0	100.0	1	pp	WP_132170147_1 (pp) WP_132170149_1	100.0
2833	OJV24806_3 (pp) OJV24808_3	61.0	100.0	1	pp	OJV24806_3 (pp) OJV24808_3	100.0
2834	RED74809_7 (pp) WP_116154877_7	49.0	100.0	1	pp	RED74809_7 (pp) WP_116154877_7	100.0
2835	PJJ46026_2 (pp) WP_100302197_2	22.0	100.0	1	pp	PJJ46026_2 (pp) WP_100302197_2	100.0
2836	WP_104181080_2 (pp) WP_105032337_2	37.0	91.262	1	pp	WP_104181080_2 (pp) WP_105032337_2	91.26
2837	PDQ36469_2 (pp) WP_125614105_1	22.0	61.404	1	pp	PDQ36469_2 (pp) WP_125614105_1	41.67
2838	WP_130875440_1 (pp) WP_061787443_4	51.0	94.937	1	pp	WP_130875440_1 (pp) WP_061787443_4	92.59
2839	WP_017568553_3 (pp) WP_017568552_3	53.0	100.0	1	pp	WP_017568553_3 (pp) WP_017568552_3	100.0
2840	WP_096168585_3 (pp) WP_135448567_2	18.0	96.774	1	pp	WP_096168585_3 (pp) WP_135448567_2	96.77
2841	WP_131965734_3 (pp) WP_131965735_4	76.0	100.0	1	pp	WP_131965734_3 (pp) WP_131965735_4	100.0
2842	CCB71037_1 (pp) WP_078590495_1	75.0	100.0	1	pp	CCB71037_1 (pp) WP_078590495_1	100.0
2843	WP_084692314_4 (pp) WP_084692311_6	79.0	100.0	1	pp	WP_084692314_4 (pp) WP_084692311_6	100.0
2844	WP_079182634_3 (pp) OKI46856_3	59.0	100.0	1	pp	WP_079182634_3 (pp) OKI46856_3	100.0
2845	WP_048316860_2 (pp) WP_048317341_2	73.0	100.0	1	pp	WP_048316860_2 (pp) WP_048317341_2	100.0
2846	WP_035861760_1 (pp) EXG81129_1	82.0	100.0	1	pp	WP_035861760_1 (pp) EXG81129_1	100.0
2847	SEG99236_1 (pp) WP_103960548_1	49.0	100.0	1	pp	SEG99236_1 (pp) WP_103960548_1	100.0
2848	WP_116708219_1 (pp) WP_133828511_1	48.0	80.723	1	pp	WP_116708219_1 (pp) WP_133828511_1	80.72
2849	WP_034253534_4 (pp) EGQ75425_4	55.0	100.0	1	pp	WP_034253534_4 (pp) EGQ75425_4	100.0
2850	EMF02011_4 (pp) WP_040887728_4	61.0	100.0	1	pp	EMF02011_4 (pp) WP_040887728_4	100.0
2851	KJK44488_5 (pp) WP_082115066_4	56.0	100.0	1	pp	KJK44488_5 (pp) WP_082115066_4	100.0
2852	SGI74060_1 (pp) WP_079180155_1	17.0	100.0	1	pp	SGI74060_1 (pp) WP_079180155_1	100.0
2853	SMF78969_1 (pp) WP_085213387_1	24.0	100.0	1	pp	SMF78969_1 (pp) WP_085213387_1	100.0
2854	WP_073876556_3 (pp) RLV71217_2	17.0	86.842	1	pp	WP_073876556_3 (pp) RLV71217_2	86.84
2855	WP_064833209_2 (pp) OBA55656_3	47.0	100.0	1	pp	WP_064833209_2 (pp) OBA55656_3	100.0
2856	WP_093544729_1 (pp) SCD31130_1	81.0	100.0	1	pp	WP_093544729_1 (pp) SCD31130_1	100.0
2857	RUP01435_5 (pp) WP_055578070_5	33.0	88.333	1	pp	RUP01435_5 (pp) WP_055578070_5	86.88
2858	WP_017559667_3 (pp) ROS45991_2	4.5	47.826	0	pp	WP_017559667_3 (pp) ROS45991_2	40.74
2859	WP_131965734_2 (pp) WP_131965735_3	79.0	100.0	1	pp	WP_131965734_2 (pp) WP_131965735_3	100.0
2860	WP_100861846_2 (pp) WP_051777853_1	24.0	54.217	1	pp	WP_100861846_2 (pp) WP_051777853_1	54.22
2861	WP_082248115_3 (pp) WP_080684945_1	50.0	98.718	1	pp	WP_082248115_3 (pp) WP_080684945_1	98.72
2862	WP_082248115_3 (pp) OQM68597_3	51.0	100.0	1	pp	WP_082248115_3 (pp) OQM68597_3	100.0
2863	WP_080684945_1 (pp) OQM68597_3	50.0	98.718	1	pp	WP_080684945_1 (pp) OQM68597_3	98.72
2864	WP_080909324_1 (pp) WP_124566915_1	45.0	91.753	1	pp	WP_080909324_1 (pp) WP_124566915_1	94.68
2865	WP_080909324_1 (pp) WP_075831737_1	61.0	93.814	1	pp	WP_080909324_1 (pp) WP_075831737_1	96.81
2866	WP_075831737_1 (pp) WP_124566915_1	48.0	95.745	1	pp	WP_075831737_1 (pp) WP_124566915_1	95.74
2867	SDL97273_3 (pp) WP_091216389_3	35.0	100.0	1	pp	SDL97273_3 (pp) WP_091216389_3	100.0
2868	WP_030701973_2 (pp) WP_091216389_3	6.1	61.111	0	pp	WP_030701973_2 (pp) WP_091216389_3	40.74
2869	WP_030701973_2 (pp) SDL97273_3	6.1	61.111	0	pp	WP_030701973_2 (pp) SDL97273_3	40.74
2870	WP_054213495_3 (pp) KPI20077_3	28.0	100.0	1	pp	WP_054213495_3 (pp) KPI20077_3	100.0
2871	WP_119105432_2 (pp) KPI20077_3	6.0	51.163	1	pp	WP_119105432_2 (pp) KPI20077_3	45.83
2872	WP_119105432_2 (pp) WP_054213495_3	6.0	51.163	1	pp	WP_119105432_2 (pp) WP_054213495_3	45.83
2873	WP_051338384_1 (pp) WP_106674009_1	7.0	54.839	1	pp	WP_051338384_1 (pp) WP_106674009_1	41.46
2874	WP_106674009_1 (pp) WP_125314889_1	5.0	48.837	1	pp	WP_106674009_1 (pp) WP_125314889_1	46.67
2875	SCG59471_1 (pp) REF98980_2	17.0	48.421	1	pp	SCG59471_1 (pp) REF98980_2	51.11
2876	WP_053652832_3 (pp) REF98980_2	14.0	49.18	1	pp	WP_053652832_3 (pp) REF98980_2	44.12
2877	WP_053652832_3 (pp) SCG59471_1	25.0	73.016	1	pp	WP_053652832_3 (pp) SCG59471_1	67.65
2878	SDE51953_4 (pp) WP_069774196_3	15.0	50.0	1	pp	SDE51953_4 (pp) WP_069774196_3	47.14
2879	WP_091040567_5 (pp) WP_069774196_3	15.0	50.0	1	pp	WP_091040567_5 (pp) WP_069774196_3	47.14
2880	WP_091040567_5 (pp) SDE51953_4	55.0	100.0	1	pp	WP_091040567_5 (pp) SDE51953_4	100.0
2881	WP_116154877_6 (pp) RED74809_6	48.0	100.0	1	pp	WP_116154877_6 (pp) RED74809_6	100.0
2882	PKV33869_6 (pp) WP_116154877_6	47.0	97.059	1	pp	PKV33869_6 (pp) WP_116154877_6	97.06
2883	PKV33869_6 (pp) RED74809_6	47.0	97.059	1	pp	PKV33869_6 (pp) RED74809_6	97.06
2884	WP_043591397_2 (pp) WP_108913844_2	78.0	98.198	1	pp	WP_043591397_2 (pp) WP_108913844_2	98.2
2885	WP_076804070_2 (pp) WP_043591397_2	78.0	98.198	1	pp	WP_076804070_2 (pp) WP_043591397_2	98.2
2886	WP_076804070_2 (pp) WP_108913844_2	79.0	100.0	1	pp	WP_076804070_2 (pp) WP_108913844_2	100.0
2887	WP_107120384_3 (pp) KUN25245_3	77.0	100.0	1	pp	WP_107120384_3 (pp) KUN25245_3	100.0
2888	WP_059193363_3 (pp) WP_107120384_3	77.0	100.0	1	pp	WP_059193363_3 (pp) WP_107120384_3	100.0
2889	WP_059193363_3 (pp) KUN25245_3	77.0	100.0	1	pp	WP_059193363_3 (pp) KUN25245_3	100.0
2890	WP_081900771_1 (pp) SDM16976_1	78.0	100.0	1	pp	WP_081900771_1 (pp) SDM16976_1	100.0
2891	WP_086828879_1 (pp) WP_081900771_1	74.0	93.519	1	pp	WP_086828879_1 (pp) WP_081900771_1	93.52
2892	WP_086828879_1 (pp) SDM16976_1	74.0	93.519	1	pp	WP_086828879_1 (pp) SDM16976_1	93.52
2893	WP_083715654_5 (pp) ONF71727_5	68.0	98.0	1	pp	WP_083715654_5 (pp) ONF71727_5	98.0
2894	WP_083715654_5 (pp) WP_072028150_2	69.0	100.0	1	pp	WP_083715654_5 (pp) WP_072028150_2	100.0
2895	WP_072028150_2 (pp) ONF71727_5	68.0	98.0	1	pp	WP_072028150_2 (pp) ONF71727_5	98.0
2896	WP_076843254_2 (pp) WP_076843253_2	38.0	100.0	1	pp	WP_076843254_2 (pp) WP_076843253_2	100.0
2897	KLL12571_3 (pp) WP_076843253_2	38.0	100.0	1	pp	KLL12571_3 (pp) WP_076843253_2	100.0
2898	KLL12571_3 (pp) WP_076843254_2	38.0	100.0	1	pp	KLL12571_3 (pp) WP_076843254_2	100.0
2899	WP_127571148_1 (pp) EFF80328_1	43.0	76.744	1	pp	WP_127571148_1 (pp) EFF80328_1	64.08
2900	WP_082163142_1 (pp) WP_127571148_1	43.0	75.581	1	pp	WP_082163142_1 (pp) WP_127571148_1	63.11
2901	WP_082163142_1 (pp) EFF80328_1	71.0	87.288	1	pp	WP_082163142_1 (pp) EFF80328_1	87.29
2902	EWM64891_1 (pp) WP_082931047_1	60.0	100.0	1	pp	EWM64891_1 (pp) WP_082931047_1	100.0
2903	WP_083296959_1 (pp) EWM64891_1	60.0	100.0	1	pp	WP_083296959_1 (pp) EWM64891_1	100.0
2904	WP_083296959_1 (pp) WP_082931047_1	60.0	100.0	1	pp	WP_083296959_1 (pp) WP_082931047_1	100.0
2905	WP_083296959_3 (pp) WP_082931047_3	19.0	100.0	1	pp	WP_083296959_3 (pp) WP_082931047_3	100.0
2906	WP_083296959_3 (pp) EWM64891_3	19.0	100.0	1	pp	WP_083296959_3 (pp) EWM64891_3	100.0
2907	EWM64891_3 (pp) WP_082931047_3	19.0	100.0	1	pp	EWM64891_3 (pp) WP_082931047_3	100.0
2908	WP_099279259_5 (pp) WP_134664144_5	25.0	52.809	1	pp	WP_099279259_5 (pp) WP_134664144_5	43.12
2909	WP_134664144_7 (pp) WP_099279259_5	47.0	78.824	1	pp	WP_134664144_7 (pp) WP_099279259_5	63.81
2910	WP_134664144_7 (pp) WP_134664144_5	29.0	59.551	1	pp	WP_134664144_7 (pp) WP_134664144_5	50.48
2911	WP_098695120_3 (pp) WP_082871442_2	35.0	100.0	1	pp	WP_098695120_3 (pp) WP_082871442_2	100.0
2912	WP_098695120_3 (pp) KZM72684_2	35.0	100.0	1	pp	WP_098695120_3 (pp) KZM72684_2	100.0
2913	KZM72684_2 (pp) WP_082871442_2	35.0	100.0	1	pp	KZM72684_2 (pp) WP_082871442_2	100.0
2914	WP_093170892_5 (pp) SDH11838_5	62.0	100.0	1	pp	WP_093170892_5 (pp) SDH11838_5	100.0
2915	WP_093170943_3 (pp) SDH11838_5	62.0	100.0	1	pp	WP_093170943_3 (pp) SDH11838_5	100.0
2916	WP_093170943_3 (pp) WP_093170892_5	62.0	100.0	1	pp	WP_093170943_3 (pp) WP_093170892_5	100.0
2917	WP_131103335_2 (pp) WP_082128669_2	11.0	43.636	1	pp	WP_131103335_2 (pp) WP_082128669_2	40.68
2918	WP_131103335_2 (pp) KLO64220_4	11.0	43.636	1	pp	WP_131103335_2 (pp) KLO64220_4	40.68
2919	WP_082128669_2 (pp) KLO64220_4	36.0	100.0	1	pp	WP_082128669_2 (pp) KLO64220_4	100.0
2920	WP_082931047_2 (pp) EWM64891_2	36.0	100.0	1	pp	WP_082931047_2 (pp) EWM64891_2	100.0
2921	WP_083296959_2 (pp) EWM64891_2	36.0	100.0	1	pp	WP_083296959_2 (pp) EWM64891_2	100.0
2922	WP_083296959_2 (pp) WP_082931047_2	36.0	100.0	1	pp	WP_083296959_2 (pp) WP_082931047_2	100.0
2923	WP_125547276_1 (pp) CUM40551_5	25.0	52.427	1	pp	WP_125547276_1 (pp) CUM40551_5	60.0
2924	WP_079037558_6 (pp) WP_125547276_1	10.0	52.427	1	pp	WP_079037558_6 (pp) WP_125547276_1	60.0
2925	WP_079037558_6 (pp) CUM40551_5	62.0	100.0	1	pp	WP_079037558_6 (pp) CUM40551_5	100.0
2926	SDE51953_1 (pp) WP_091040567_2	80.0	100.0	1	pp	SDE51953_1 (pp) WP_091040567_2	100.0
2927	WP_082822395_1 (pp) SDE51953_1	26.0	53.333	1	pp	WP_082822395_1 (pp) SDE51953_1	43.24
2928	WP_082822395_1 (pp) WP_091040567_2	26.0	53.333	1	pp	WP_082822395_1 (pp) WP_091040567_2	43.24
2929	WP_093170943_1 (pp) WP_093170892_2	51.0	100.0	1	pp	WP_093170943_1 (pp) WP_093170892_2	100.0
2930	SDH11838_2 (pp) WP_093170892_2	51.0	100.0	1	pp	SDH11838_2 (pp) WP_093170892_2	100.0
2931	SDH11838_2 (pp) WP_093170943_1	51.0	100.0	1	pp	SDH11838_2 (pp) WP_093170943_1	100.0
2932	WP_132619812_2 (pp) CAM04239_3	7.0	83.333	1	pp	WP_132619812_2 (pp) CAM04239_3	83.33
2933	WP_132619812_2 (pp) WP_009951067_2	7.0	83.333	1	pp	WP_132619812_2 (pp) WP_009951067_2	83.33
2934	CAM04239_3 (pp) WP_009951067_2	24.0	100.0	1	pp	CAM04239_3 (pp) WP_009951067_2	100.0
2935	WP_052318929_1 (pp) AKJ13608_3	50.0	81.928	1	pp	WP_052318929_1 (pp) AKJ13608_3	80.95
2936	KIE24863_1 (pp) WP_052318929_1	59.0	100.0	1	pp	KIE24863_1 (pp) WP_052318929_1	100.0
2937	KIE24863_1 (pp) AKJ13608_3	50.0	81.928	1	pp	KIE24863_1 (pp) AKJ13608_3	80.95
2938	SFK92414_3 (pp) WP_125792333_4	21.0	67.797	1	pp	SFK92414_3 (pp) WP_125792333_4	66.67
2939	SFK92414_3 (pp) WP_093601012_1	8.0	47.727	1	pp	SFK92414_3 (pp) WP_093601012_1	41.18
2940	WP_130490932_1 (pp) WP_129176857_3	6.0	40.0	1	pp	WP_130490932_1 (pp) WP_129176857_3	40.51
2941	WP_053775070_2 (pp) WP_129176857_3	13.0	44.318	1	pp	WP_053775070_2 (pp) WP_129176857_3	49.37
2942	WP_070795263_3 (pp) WP_088246551_3	60.0	100.0	1	pp	WP_070795263_3 (pp) WP_088246551_3	100.0
2943	OMO45941_2 (pp) WP_070795263_3	54.0	91.667	1	pp	OMO45941_2 (pp) WP_070795263_3	91.67
2944	OMO45941_2 (pp) WP_088246551_3	54.0	91.667	1	pp	OMO45941_2 (pp) WP_088246551_3	91.67
2945	WP_007536321_2 (pp) EME16460_2	30.0	100.0	1	pp	WP_007536321_2 (pp) EME16460_2	100.0
2946	WP_043809367_2 (pp) EME16460_2	30.0	100.0	1	pp	WP_043809367_2 (pp) EME16460_2	100.0
2947	WP_043809367_2 (pp) WP_007536321_2	30.0	100.0	1	pp	WP_043809367_2 (pp) WP_007536321_2	100.0
2948	WP_110565442_9001 (pp) WP_074475319_9003	25.0	90.741	1	pp	WP_110565442_9001 (pp) WP_074475319_9003	80.33
2949	WP_110565442_9001 (pp) WP_091614694_9002	15.0	68.519	1	pp	WP_110565442_9001 (pp) WP_091614694_9002	60.66
2950	WP_091614694_9002 (pp) WP_074475319_9003	16.0	68.519	1	pp	WP_091614694_9002 (pp) WP_074475319_9003	60.66
2951	WP_061300719_1 (pp) WP_061300720_1	84.0	100.0	1	pp	WP_061300719_1 (pp) WP_061300720_1	100.0
2952	WP_061300719_1 (pp) WP_061300721_1	84.0	100.0	1	pp	WP_061300719_1 (pp) WP_061300721_1	100.0
2953	WP_061300721_1 (pp) WP_061300720_1	84.0	100.0	1	pp	WP_061300721_1 (pp) WP_061300720_1	100.0
2954	WP_092888237_1 (pp) WP_135971800_3	17.0	60.345	1	pp	WP_092888237_1 (pp) WP_135971800_3	51.47
2955	WP_092888237_1 (pp) WP_092888237_3	11.0	43.75	1	pp	WP_092888237_1 (pp) WP_092888237_3	51.47
2956	WP_135971800_3 (pp) WP_092888237_3	10.0	45.588	1	pp	WP_135971800_3 (pp) WP_092888237_3	45.59
2957	WP_092807119_3 (pp) WP_091247291_2	30.0	91.071	1	pp	WP_092807119_3 (pp) WP_091247291_2	68.0
2958	SCX58064_3 (pp) WP_092807119_3	46.0	100.0	1	pp	SCX58064_3 (pp) WP_092807119_3	100.0
2959	SCX58064_3 (pp) WP_091247291_2	30.0	91.071	1	pp	SCX58064_3 (pp) WP_091247291_2	68.0
2960	SFI84698_2 (pp) ACZ89043_3	26.0	89.13	1	pp	SFI84698_2 (pp) ACZ89043_3	89.13
2961	SFI84698_2 (pp) WP_081937495_2	30.0	100.0	1	pp	SFI84698_2 (pp) WP_081937495_2	100.0
2962	WP_081937495_2 (pp) ACZ89043_3	26.0	89.13	1	pp	WP_081937495_2 (pp) ACZ89043_3	89.13
2963	WP_044386624_1 (pp) WP_130329265_1	17.0	62.903	1	pp	WP_044386624_1 (pp) WP_130329265_1	52.0
2964	WP_116150435_1 (pp) WP_130329265_1	41.0	85.333	1	pp	WP_116150435_1 (pp) WP_130329265_1	85.33
2965	WP_116150435_1 (pp) WP_044386624_1	15.0	52.326	1	pp	WP_116150435_1 (pp) WP_044386624_1	55.56
2966	RKS80725_1 (pp) WP_121191582_1	54.0	100.0	1	pp	RKS80725_1 (pp) WP_121191582_1	100.0
2967	WP_007495061_1 (pp) RKS80725_1	28.0	52.0	1	pp	WP_007495061_1 (pp) RKS80725_1	51.32
2968	WP_007495061_1 (pp) WP_121191582_1	28.0	52.0	1	pp	WP_007495061_1 (pp) WP_121191582_1	51.32
2969	ESU58068_3 (pp) WP_046096646_3	57.0	100.0	1	pp	ESU58068_3 (pp) WP_046096646_3	100.0
2970	ESU58068_3 (pp) WP_087454414_3	50.0	89.157	1	pp	ESU58068_3 (pp) WP_087454414_3	89.16
2971	WP_087454414_3 (pp) WP_046096646_3	50.0	89.157	1	pp	WP_087454414_3 (pp) WP_046096646_3	89.16
2972	WP_079051299_1 (pp) KUM76187_1	26.0	100.0	1	pp	WP_079051299_1 (pp) KUM76187_1	100.0
2973	AFJ68075_1 (pp) KUM76187_1	16.0	85.714	1	pp	AFJ68075_1 (pp) KUM76187_1	83.33
2974	AFJ68075_1 (pp) WP_079051299_1	16.0	85.714	1	pp	AFJ68075_1 (pp) WP_079051299_1	83.33
2975	SDG32337_1 (pp) SDL74859_1	24.0	49.383	1	pp	SDG32337_1 (pp) SDL74859_1	50.0
2976	SDG32337_1 (pp) WP_090009591_1	24.0	49.383	1	pp	SDG32337_1 (pp) WP_090009591_1	50.0
2977	SDL74859_1 (pp) WP_090009591_1	81.0	100.0	1	pp	SDL74859_1 (pp) WP_090009591_1	100.0
2978	WP_083603298_2 (pp) OKL53160_2	16.0	100.0	1	pp	WP_083603298_2 (pp) OKL53160_2	100.0
2979	WP_083603298_2 (pp) WP_082248115_2	0.023	44.444	0	pp	WP_083603298_2 (pp) WP_082248115_2	42.86
2980	WP_082248115_2 (pp) OKL53160_2	0.05	44.444	0	pp	WP_082248115_2 (pp) OKL53160_2	42.86
2981	WP_066217216_1 (pp) WP_082724316_1	66.0	100.0	1	pp	WP_066217216_1 (pp) WP_082724316_1	100.0
2982	SEB29931_3 (pp) WP_066217216_1	84.0	100.0	1	pp	SEB29931_3 (pp) WP_066217216_1	100.0
2983	SEB29931_3 (pp) WP_082724316_1	66.0	100.0	1	pp	SEB29931_3 (pp) WP_082724316_1	100.0
2984	AXG59058_1 (pp) WP_079164984_1	67.0	100.0	1	pp	AXG59058_1 (pp) WP_079164984_1	100.0
2985	AXG59058_1 (pp) ANS70161_1	67.0	100.0	1	pp	AXG59058_1 (pp) ANS70161_1	100.0
2986	ANS70161_1 (pp) WP_079164984_1	67.0	100.0	1	pp	ANS70161_1 (pp) WP_079164984_1	100.0
2987	WP_083597719_2 (pp) SFO39709_2	36.0	100.0	1	pp	WP_083597719_2 (pp) SFO39709_2	100.0
2988	WP_083597719_2 (pp) WP_101786715_1	17.0	51.923	1	pp	WP_083597719_2 (pp) WP_101786715_1	50.0
2989	SFO39709_2 (pp) WP_101786715_1	17.0	51.923	1	pp	SFO39709_2 (pp) WP_101786715_1	50.0
2990	KUN25245_4 (pp) WP_059193363_4	25.0	100.0	1	pp	KUN25245_4 (pp) WP_059193363_4	100.0
2991	WP_107120384_4 (pp) KUN25245_4	25.0	100.0	1	pp	WP_107120384_4 (pp) KUN25245_4	100.0
2992	WP_107120384_4 (pp) WP_059193363_4	25.0	100.0	1	pp	WP_107120384_4 (pp) WP_059193363_4	100.0
2993	RKT36058_2 (pp) WP_058623611_1	30.0	57.143	1	pp	RKT36058_2 (pp) WP_058623611_1	55.91
2994	WP_121148667_1 (pp) RKT36058_2	65.0	100.0	1	pp	WP_121148667_1 (pp) RKT36058_2	100.0
2995	WP_121148667_1 (pp) WP_058623611_1	30.0	57.143	1	pp	WP_121148667_1 (pp) WP_058623611_1	55.91
2996	WP_051816122_1 (pp) WP_111506795_3	15.0	53.704	1	pp	WP_051816122_1 (pp) WP_111506795_3	50.0
2997	WP_125499925_1 (pp) WP_051816122_1	40.0	96.721	1	pp	WP_125499925_1 (pp) WP_051816122_1	96.72
2998	WP_125499925_1 (pp) WP_111506795_3	16.0	53.704	1	pp	WP_125499925_1 (pp) WP_111506795_3	50.0
2999	WP_083318853_2 (pp) WP_083304061_2	40.0	100.0	1	pp	WP_083318853_2 (pp) WP_083304061_2	100.0
3000	WP_083318853_2 (pp) OFL66352_2	40.0	100.0	1	pp	WP_083318853_2 (pp) OFL66352_2	100.0
3001	OFL66352_2 (pp) WP_083304061_2	40.0	100.0	1	pp	OFL66352_2 (pp) WP_083304061_2	100.0
3002	WP_030269598_1 (pp) WP_057232473_1	10.0	72.414	1	pp	WP_030269598_1 (pp) WP_057232473_1	44.68
3003	WP_030269598_1 (pp) WP_128378882_1	9.0	53.061	1	pp	WP_030269598_1 (pp) WP_128378882_1	55.32
3004	KUN25245_2 (pp) WP_107120384_2	49.0	100.0	1	pp	KUN25245_2 (pp) WP_107120384_2	100.0
3005	KUN25245_2 (pp) WP_059193363_2	49.0	100.0	1	pp	KUN25245_2 (pp) WP_059193363_2	100.0
3006	WP_059193363_2 (pp) WP_107120384_2	49.0	100.0	1	pp	WP_059193363_2 (pp) WP_107120384_2	100.0
3007	RPK69291_1 (pp) WP_124271723_1	58.0	100.0	1	pp	RPK69291_1 (pp) WP_124271723_1	100.0
3008	RPK69291_1 (pp) WP_116209352_1	22.0	65.672	1	pp	RPK69291_1 (pp) WP_116209352_1	48.89
3009	WP_116209352_1 (pp) WP_124271723_1	27.0	72.881	1	pp	WP_116209352_1 (pp) WP_124271723_1	47.78
3010	OIJ88146_4 (pp) WP_023554016_1	18.0	80.0	1	pp	OIJ88146_4 (pp) WP_023554016_1	80.0
3011	OIJ88146_4 (pp) WP_079177123_4	24.0	100.0	1	pp	OIJ88146_4 (pp) WP_079177123_4	100.0
3012	WP_079177123_4 (pp) WP_023554016_1	18.0	80.0	1	pp	WP_079177123_4 (pp) WP_023554016_1	80.0
3013	AGC62644_1 (pp) CDM77002_2	49.0	100.0	1	pp	AGC62644_1 (pp) CDM77002_2	100.0
3014	WP_020787304_1 (pp) AGC62644_1	49.0	100.0	1	pp	WP_020787304_1 (pp) AGC62644_1	100.0
3015	WP_020787304_1 (pp) CDM77002_2	49.0	100.0	1	pp	WP_020787304_1 (pp) CDM77002_2	100.0
3016	WP_030877129_2 (pp) WP_082871442_1	38.0	53.846	1	pp	WP_030877129_2 (pp) WP_082871442_1	53.33
3017	KZM72684_1 (pp) WP_030877129_2	41.0	53.846	1	pp	KZM72684_1 (pp) WP_030877129_2	53.33
3018	KZM72684_1 (pp) WP_082871442_1	76.0	100.0	1	pp	KZM72684_1 (pp) WP_082871442_1	100.0
3019	WP_067972339_5 (pp) WP_078971081_3	25.0	67.925	1	pp	WP_067972339_5 (pp) WP_078971081_3	57.14
3020	WP_067972339_5 (pp) KPC62607_3	25.0	67.925	1	pp	WP_067972339_5 (pp) KPC62607_3	57.14
3021	WP_078971081_3 (pp) KPC62607_3	44.0	100.0	1	pp	WP_078971081_3 (pp) KPC62607_3	100.0
3022	SER15522_1 (pp) SMC91639_1	23.0	69.355	1	pp	SER15522_1 (pp) SMC91639_1	48.31
3023	SER15522_1 (pp) WP_089952439_1	68.0	100.0	1	pp	SER15522_1 (pp) WP_089952439_1	100.0
3024	WP_089952439_1 (pp) SMC91639_1	23.0	69.355	1	pp	WP_089952439_1 (pp) SMC91639_1	48.31
3025	WP_055553439_1 (pp) AKJ13608_5	8.0	58.696	1	pp	WP_055553439_1 (pp) AKJ13608_5	47.37
3026	WP_037862255_2 (pp) AKJ13608_5	5.0	50.0	1	pp	WP_037862255_2 (pp) AKJ13608_5	42.62
3027	WP_037862255_2 (pp) WP_055553439_1	4.0	56.25	1	pp	WP_037862255_2 (pp) WP_055553439_1	47.37
3028	WP_006143940_1 (pp) WP_100806338_2	43.0	91.045	1	pp	WP_006143940_1 (pp) WP_100806338_2	91.05
3029	WP_126890470_1 (pp) WP_006143940_1	28.0	67.188	1	pp	WP_126890470_1 (pp) WP_006143940_1	64.18
3030	WP_126890470_1 (pp) WP_100806338_2	26.0	65.625	1	pp	WP_126890470_1 (pp) WP_100806338_2	62.69
3031	WP_104181080_1 (pp) WP_105032337_1	47.0	85.393	1	pp	WP_104181080_1 (pp) WP_105032337_1	85.39
3032	WP_104181080_1 (pp) WP_098514311_1	12.0	43.182	1	pp	WP_104181080_1 (pp) WP_098514311_1	42.7
3033	WP_105032337_1 (pp) WP_098514311_1	13.0	40.909	1	pp	WP_105032337_1 (pp) WP_098514311_1	40.45
3034	PJJ39560_4 (pp) WP_100302786_4	55.0	100.0	1	pp	PJJ39560_4 (pp) WP_100302786_4	100.0
3035	PJJ39560_4 (pp) WP_078564093_4	15.0	73.77	1	pp	PJJ39560_4 (pp) WP_078564093_4	80.36
3036	WP_078564093_4 (pp) WP_100302786_4	13.0	78.378	0	pp	WP_078564093_4 (pp) WP_100302786_4	51.79
3037	WP_094009173_4 (pp) WP_057608322_3	7.0	58.065	0	pp	WP_094009173_4 (pp) WP_057608322_3	42.86
3038	WP_094009173_4 (pp) WP_123074529_4	23.0	80.488	0	pp	WP_094009173_4 (pp) WP_123074529_4	78.57
3039	WP_101557149_1 (pp) WP_101557151_1	50.0	100.0	1	pp	WP_101557149_1 (pp) WP_101557151_1	100.0
3040	WP_116200011_2 (pp) WP_101557151_1	6.0	50.0	0	pp	WP_116200011_2 (pp) WP_101557151_1	42.42
3041	WP_116200011_2 (pp) WP_101557149_1	6.0	50.0	0	pp	WP_116200011_2 (pp) WP_101557149_1	42.42
3042	WP_061409829_2 (pp) WP_075142776_2	35.0	100.0	1	pp	WP_061409829_2 (pp) WP_075142776_2	100.0
3043	WP_061409829_2 (pp) AFK17249_2	35.0	100.0	1	pp	WP_061409829_2 (pp) AFK17249_2	100.0
3044	AFK17249_2 (pp) WP_075142776_2	35.0	100.0	1	pp	AFK17249_2 (pp) WP_075142776_2	100.0
3045	WP_078561279_4 (pp) EFL12569_3	44.0	100.0	1	pp	WP_078561279_4 (pp) EFL12569_3	100.0
3046	WP_078561279_4 (pp) WP_014690715_1	0.5	42.105	0	pp	WP_078561279_4 (pp) WP_014690715_1	40.0
3047	EFL12569_3 (pp) WP_014690715_1	0.5	42.105	0	pp	EFL12569_3 (pp) WP_014690715_1	40.0
3048	WP_071042996_1 (pp) WP_104167780_1	14.0	45.312	1	pp	WP_071042996_1 (pp) WP_104167780_1	41.43
3049	WP_071042996_1 (pp) WP_071042994_1	48.0	100.0	1	pp	WP_071042996_1 (pp) WP_071042994_1	100.0
3050	WP_071042994_1 (pp) WP_104167780_1	14.0	45.312	1	pp	WP_071042994_1 (pp) WP_104167780_1	41.43
3051	WP_113979657_5 (pp) ANN17130_2	23.0	45.946	1	pp	WP_113979657_5 (pp) ANN17130_2	45.95
3052	WP_103341360_2 (pp) ANN17130_2	30.0	61.194	1	pp	WP_103341360_2 (pp) ANN17130_2	56.16
3053	WP_111209344_1 (pp) SBN62121_2	56.0	76.522	1	pp	WP_111209344_1 (pp) SBN62121_2	76.52
3054	WP_111209344_1 (pp) WP_110911190_2	61.0	91.837	1	pp	WP_111209344_1 (pp) WP_110911190_2	91.84
3055	SBN62121_2 (pp) WP_110911190_2	56.0	81.633	1	pp	SBN62121_2 (pp) WP_110911190_2	81.63
3056	WP_070739770_2 (pp) WP_070739770_4	40.0	57.009	1	pp	WP_070739770_2 (pp) WP_070739770_4	56.48
3057	WP_070739770_3 (pp) WP_070739770_2	39.0	65.625	1	pp	WP_070739770_3 (pp) WP_070739770_2	65.62
3058	WP_070739770_3 (pp) WP_070739770_4	40.0	63.542	1	pp	WP_070739770_3 (pp) WP_070739770_4	63.54
3059	WP_131626375_2 (pp) WP_082057091_2	17.0	49.315	1	pp	WP_131626375_2 (pp) WP_082057091_2	52.94
3060	AJT41785_2 (pp) WP_082057091_2	71.0	100.0	1	pp	AJT41785_2 (pp) WP_082057091_2	100.0
3061	AJT41785_2 (pp) WP_131626375_2	17.0	49.315	1	pp	AJT41785_2 (pp) WP_131626375_2	52.94
3062	WP_054567598_3 (pp) WP_076824657_3	70.0	99.038	1	pp	WP_054567598_3 (pp) WP_076824657_3	99.04
3063	WP_054567598_3 (pp) WP_091272827_2	30.0	59.615	1	pp	WP_054567598_3 (pp) WP_091272827_2	59.62
3064	WP_054567598_3 (pp) WP_091272829_2	30.0	59.615	1	pp	WP_054567598_3 (pp) WP_091272829_2	59.62
3065	WP_091272827_2 (pp) WP_091272829_2	81.0	100.0	1	pp	WP_091272827_2 (pp) WP_091272829_2	100.0
3066	WP_076824657_3 (pp) WP_091272827_2	29.0	60.577	1	pp	WP_076824657_3 (pp) WP_091272827_2	60.58
3067	WP_076824657_3 (pp) WP_091272829_2	29.0	60.577	1	pp	WP_076824657_3 (pp) WP_091272829_2	60.58
3068	SIR58548_3 (pp) WP_111167565_5	14.0	65.306	1	pp	SIR58548_3 (pp) WP_111167565_5	48.48
3069	SIR58548_3 (pp) WP_049570352_6	19.0	63.333	1	pp	SIR58548_3 (pp) WP_049570352_6	57.58
3070	WP_113985589_4 (pp) SIR58548_3	15.0	76.19	1	pp	WP_113985589_4 (pp) SIR58548_3	48.48
3071	WP_113985589_4 (pp) WP_111167565_5	46.0	94.737	1	pp	WP_113985589_4 (pp) WP_111167565_5	94.74
3072	WP_113985589_4 (pp) WP_049570352_6	25.0	65.753	1	pp	WP_113985589_4 (pp) WP_049570352_6	63.16
3073	WP_049570352_6 (pp) WP_111167565_5	26.0	65.753	1	pp	WP_049570352_6 (pp) WP_111167565_5	63.16
3074	WP_075012634_3 (pp) WP_093583210_4	44.0	90.278	1	pp	WP_075012634_3 (pp) WP_093583210_4	90.28
3075	WP_075012634_3 (pp) SFO01480_4	49.0	100.0	1	pp	WP_075012634_3 (pp) SFO01480_4	100.0
3076	WP_075012634_3 (pp) WP_089404560_4	32.0	74.286	1	pp	WP_075012634_3 (pp) WP_089404560_4	72.22
3077	WP_093583210_4 (pp) SFO01480_4	44.0	90.278	1	pp	WP_093583210_4 (pp) SFO01480_4	90.28
3078	WP_093583210_4 (pp) WP_089404560_4	41.0	82.051	1	pp	WP_093583210_4 (pp) WP_089404560_4	80.0
3079	WP_089404560_4 (pp) SFO01480_4	32.0	74.286	1	pp	WP_089404560_4 (pp) SFO01480_4	72.22
3080	WP_061300623_4 (pp) WP_062440803_4	52.0	89.286	1	pp	WP_061300623_4 (pp) WP_062440803_4	83.33
3081	WP_061300623_4 (pp) WP_066366076_4	59.0	94.444	1	pp	WP_061300623_4 (pp) WP_066366076_4	94.44
3082	WP_061300623_4 (pp) WP_062349267_3	54.0	89.535	1	pp	WP_061300623_4 (pp) WP_062349267_3	85.56
3083	WP_066366076_4 (pp) WP_062349267_3	57.0	95.349	1	pp	WP_066366076_4 (pp) WP_062349267_3	91.11
3084	WP_062440803_4 (pp) WP_062349267_3	57.0	92.308	1	pp	WP_062440803_4 (pp) WP_062349267_3	92.31
3085	WP_062440803_4 (pp) WP_066366076_4	53.0	89.412	1	pp	WP_062440803_4 (pp) WP_066366076_4	84.44
3086	WP_088986452_1 (pp) SCE72235_1	30.0	100.0	1	pp	WP_088986452_1 (pp) SCE72235_1	100.0
3087	WP_088986452_1 (pp) SCE72260_1	30.0	100.0	1	pp	WP_088986452_1 (pp) SCE72260_1	100.0
3088	WP_088986452_1 (pp) WP_088991224_1	30.0	100.0	1	pp	WP_088986452_1 (pp) WP_088991224_1	100.0
3089	SCE72235_1 (pp) SCE72260_1	30.0	100.0	1	pp	SCE72235_1 (pp) SCE72260_1	100.0
3090	WP_088991224_1 (pp) SCE72235_1	30.0	100.0	1	pp	WP_088991224_1 (pp) SCE72235_1	100.0
3091	WP_088991224_1 (pp) SCE72260_1	30.0	100.0	1	pp	WP_088991224_1 (pp) SCE72260_1	100.0
3092	WP_017568552_2 (pp) WP_121185217_1	45.0	82.667	1	pp	WP_017568552_2 (pp) WP_121185217_1	82.67
3093	WP_017568553_2 (pp) WP_017568552_2	54.0	100.0	1	pp	WP_017568553_2 (pp) WP_017568552_2	100.0
3094	WP_017568553_2 (pp) WP_121185217_1	45.0	82.667	1	pp	WP_017568553_2 (pp) WP_121185217_1	82.67
3095	WP_121185218_2 (pp) WP_017568552_2	45.0	82.667	1	pp	WP_121185218_2 (pp) WP_017568552_2	82.67
3096	WP_121185218_2 (pp) WP_121185217_1	53.0	100.0	1	pp	WP_121185218_2 (pp) WP_121185217_1	100.0
3097	WP_121185218_2 (pp) WP_017568553_2	45.0	82.667	1	pp	WP_121185218_2 (pp) WP_017568553_2	82.67
3098	WP_089156471_1 (pp) WP_015663091_5	30.0	45.763	1	pp	WP_089156471_1 (pp) WP_015663091_5	46.15
3099	WP_089156471_1 (pp) WP_084902797_1	28.0	42.735	1	pp	WP_089156471_1 (pp) WP_084902797_1	42.73
3100	WP_015663091_5 (pp) WP_084902797_1	53.0	67.797	1	pp	WP_015663091_5 (pp) WP_084902797_1	68.38
3101	WP_125813086_6 (pp) WP_015663091_5	34.0	49.153	1	pp	WP_125813086_6 (pp) WP_015663091_5	49.15
3102	WP_125813086_6 (pp) WP_084902797_1	31.0	49.153	1	pp	WP_125813086_6 (pp) WP_084902797_1	49.57
3103	WP_033306993_1 (pp) WP_029068734_1	33.0	61.538	1	pp	WP_033306993_1 (pp) WP_029068734_1	59.26
3104	WP_033306993_1 (pp) WP_081655210_1	33.0	69.863	1	pp	WP_033306993_1 (pp) WP_081655210_1	61.45
3105	WP_033306993_1 (pp) WP_034274384_1	32.0	68.493	1	pp	WP_033306993_1 (pp) WP_034274384_1	60.24
3106	WP_034274384_1 (pp) WP_029068734_1	33.0	70.423	1	pp	WP_034274384_1 (pp) WP_029068734_1	61.73
3107	WP_081655210_1 (pp) WP_029068734_1	32.0	60.256	1	pp	WP_081655210_1 (pp) WP_029068734_1	58.02
3108	WP_081655210_1 (pp) WP_034274384_1	59.0	90.323	1	pp	WP_081655210_1 (pp) WP_034274384_1	90.32
3109	WP_093655900_1 (pp) WP_085014622_1	32.0	69.444	1	pp	WP_093655900_1 (pp) WP_085014622_1	64.1
3110	WP_093655900_1 (pp) WP_093849541_4	48.0	91.026	1	pp	WP_093655900_1 (pp) WP_093849541_4	91.03
3111	WP_093655900_1 (pp) WP_085014620_1	32.0	69.444	1	pp	WP_093655900_1 (pp) WP_085014620_1	64.1
3112	WP_085014622_1 (pp) WP_093849541_4	30.0	65.278	1	pp	WP_085014622_1 (pp) WP_093849541_4	60.26
3113	WP_085014620_1 (pp) WP_085014622_1	56.0	100.0	1	pp	WP_085014620_1 (pp) WP_085014622_1	100.0
3114	WP_085014620_1 (pp) WP_093849541_4	30.0	65.278	1	pp	WP_085014620_1 (pp) WP_093849541_4	60.26
3115	WP_131883639_1 (pp) WP_132175704_1	49.0	86.047	1	pp	WP_131883639_1 (pp) WP_132175704_1	85.06
3116	WP_135231520_1 (pp) WP_131883639_1	23.0	46.341	1	pp	WP_135231520_1 (pp) WP_131883639_1	43.68
3117	WP_135231520_1 (pp) WP_132175704_1	22.0	47.561	1	pp	WP_135231520_1 (pp) WP_132175704_1	44.83
3118	WP_131965720_1 (pp) WP_131883639_1	49.0	85.057	1	pp	WP_131965720_1 (pp) WP_131883639_1	85.06
3119	WP_131965720_1 (pp) WP_135231520_1	22.0	47.561	1	pp	WP_131965720_1 (pp) WP_135231520_1	44.83
3120	WP_131965720_1 (pp) WP_132175704_1	58.0	98.837	1	pp	WP_131965720_1 (pp) WP_132175704_1	97.7
3121	KOG82578_1 (pp) WP_083191919_1	35.0	91.525	1	pp	KOG82578_1 (pp) WP_083191919_1	96.43
3122	SDE31545_1 (pp) KOG82578_1	34.0	91.525	1	pp	SDE31545_1 (pp) KOG82578_1	91.52
3123	SDE31545_1 (pp) WP_083191919_1	37.0	96.429	1	pp	SDE31545_1 (pp) WP_083191919_1	96.43
3124	KOU46944_1 (pp) KOG82578_1	37.0	94.915	1	pp	KOU46944_1 (pp) KOG82578_1	100.0
3125	KOU46944_1 (pp) WP_083191919_1	37.0	96.429	1	pp	KOU46944_1 (pp) WP_083191919_1	96.43
3126	KOU46944_1 (pp) SDE31545_1	37.0	96.429	1	pp	KOU46944_1 (pp) SDE31545_1	96.43
3127	WP_091051455_1 (pp) WP_104181080_4	47.0	75.269	1	pp	WP_091051455_1 (pp) WP_104181080_4	63.64
3128	WP_091051455_1 (pp) SDL22458_1	75.0	100.0	1	pp	WP_091051455_1 (pp) SDL22458_1	100.0
3129	WP_091051455_1 (pp) WP_105032337_4	53.0	73.394	1	pp	WP_091051455_1 (pp) WP_105032337_4	72.73
3130	WP_105032337_4 (pp) SDL22458_1	53.0	73.394	1	pp	WP_105032337_4 (pp) SDL22458_1	72.73
3131	WP_104181080_4 (pp) WP_105032337_4	67.0	88.393	1	pp	WP_104181080_4 (pp) WP_105032337_4	88.39
3132	WP_104181080_4 (pp) SDL22458_1	51.0	71.56	1	pp	WP_104181080_4 (pp) SDL22458_1	70.91
3133	SCL44965_4 (pp) WP_091094891_2	19.0	100.0	1	pp	SCL44965_4 (pp) WP_091094891_2	100.0
3134	SCL44965_4 (pp) WP_067972339_2	6.0	55.172	0	pp	SCL44965_4 (pp) WP_067972339_2	48.48
3135	SCL44965_4 (pp) WP_111166051_2	7.0	58.621	0	pp	SCL44965_4 (pp) WP_111166051_2	51.52
3136	WP_111166051_2 (pp) WP_091094891_2	6.0	58.621	0	pp	WP_111166051_2 (pp) WP_091094891_2	51.52
3137	WP_067972339_2 (pp) WP_091094891_2	5.0	55.172	0	pp	WP_067972339_2 (pp) WP_091094891_2	48.48
3138	WP_067972339_2 (pp) WP_111166051_2	62.0	83.333	1	pp	WP_067972339_2 (pp) WP_111166051_2	83.33
3139	WP_132268317_3 (pp) WP_132268319_3	22.0	100.0	1	pp	WP_132268317_3 (pp) WP_132268319_3	100.0
3140	WP_132268317_3 (pp) WP_132388266_4	17.0	80.556	1	pp	WP_132268317_3 (pp) WP_132388266_4	80.56
3141	WP_132268317_3 (pp) WP_132388264_4	17.0	80.556	1	pp	WP_132268317_3 (pp) WP_132388264_4	80.56
3142	WP_132388264_4 (pp) WP_132388266_4	22.0	100.0	1	pp	WP_132388264_4 (pp) WP_132388266_4	100.0
3143	WP_132388264_4 (pp) WP_132268319_3	17.0	80.556	1	pp	WP_132388264_4 (pp) WP_132268319_3	80.56
3144	WP_132268319_3 (pp) WP_132388266_4	17.0	80.556	1	pp	WP_132268319_3 (pp) WP_132388266_4	80.56
3145	KHK96352_4 (pp) WP_082008308_3	32.0	100.0	1	pp	KHK96352_4 (pp) WP_082008308_3	100.0
3146	KHK96352_4 (pp) WP_083982727_3	3.9	43.243	1	pp	KHK96352_4 (pp) WP_083982727_3	42.11
3147	WP_082008308_3 (pp) WP_083982727_3	3.9	43.243	1	pp	WP_082008308_3 (pp) WP_083982727_3	42.11
3148	WP_083982727_4 (pp) WP_083982727_3	0.037	45.0	1	pp	WP_083982727_4 (pp) WP_083982727_3	47.37
3149	WP_017568552_1 (pp) WP_017568553_1	33.0	100.0	1	pp	WP_017568552_1 (pp) WP_017568553_1	100.0
3150	WP_017568552_1 (pp) WP_028427539_1	11.0	54.545	1	pp	WP_017568552_1 (pp) WP_028427539_1	48.98
3151	WP_017568552_1 (pp) WP_078515914_1	11.0	54.545	1	pp	WP_017568552_1 (pp) WP_078515914_1	48.98
3152	WP_078515914_1 (pp) WP_017568553_1	11.0	54.545	1	pp	WP_078515914_1 (pp) WP_017568553_1	48.98
3153	WP_028427539_1 (pp) WP_017568553_1	11.0	54.545	1	pp	WP_028427539_1 (pp) WP_017568553_1	48.98
3154	WP_028427539_1 (pp) WP_078515914_1	32.0	100.0	1	pp	WP_028427539_1 (pp) WP_078515914_1	100.0
3155	WP_018657395_3 (pp) WP_132172132_2	3.9	50.0	0	pp	WP_018657395_3 (pp) WP_132172132_2	40.0
3156	WP_018657395_3 (pp) WP_091460541_1	7.0	53.333	0	pp	WP_018657395_3 (pp) WP_091460541_1	40.0
3157	WP_132172132_2 (pp) WP_121801511_6	1.2	40.0	0	pp	WP_132172132_2 (pp) WP_121801511_6	40.0
3158	WP_132388264_3 (pp) WP_132388266_3	37.0	100.0	1	pp	WP_132388264_3 (pp) WP_132388266_3	100.0
3159	WP_132388264_3 (pp) WP_132186409_2	26.0	84.0	1	pp	WP_132388264_3 (pp) WP_132186409_2	79.25
3160	WP_132388264_3 (pp) WP_132186408_2	26.0	84.0	1	pp	WP_132388264_3 (pp) WP_132186408_2	79.25
3161	WP_132186408_2 (pp) WP_132388266_3	26.0	84.0	1	pp	WP_132186408_2 (pp) WP_132388266_3	79.25
3162	WP_132186408_2 (pp) WP_132186409_2	34.0	100.0	1	pp	WP_132186408_2 (pp) WP_132186409_2	100.0
3163	WP_132388266_3 (pp) WP_132186409_2	26.0	84.0	1	pp	WP_132388266_3 (pp) WP_132186409_2	79.25
3164	AXK36690_2 (pp) WP_027737668_2	23.0	64.516	1	pp	AXK36690_2 (pp) WP_027737668_2	65.57
3165	AXK36690_2 (pp) AXK36692_1	40.0	100.0	1	pp	AXK36690_2 (pp) AXK36692_1	100.0
3166	WP_027737668_2 (pp) AXK36692_1	23.0	64.516	1	pp	WP_027737668_2 (pp) AXK36692_1	65.57
3167	WP_027737671_2 (pp) AXK36690_2	23.0	64.516	1	pp	WP_027737671_2 (pp) AXK36690_2	65.57
3168	WP_027737671_2 (pp) WP_027737668_2	39.0	100.0	1	pp	WP_027737671_2 (pp) WP_027737668_2	100.0
3169	WP_027737671_2 (pp) AXK36692_1	23.0	64.516	1	pp	WP_027737671_2 (pp) AXK36692_1	65.57
3170	WP_031012255_4 (pp) WP_107442966_6	19.0	51.389	1	pp	WP_031012255_4 (pp) WP_107442966_6	46.25
3171	WP_031012255_4 (pp) WP_057576508_4	21.0	53.425	1	pp	WP_031012255_4 (pp) WP_057576508_4	48.75
3172	WP_031012255_4 (pp) WP_078909294_8	15.0	45.833	1	pp	WP_031012255_4 (pp) WP_078909294_8	41.25
3173	WP_057576508_4 (pp) WP_107442966_6	54.0	97.5	1	pp	WP_057576508_4 (pp) WP_107442966_6	97.5
3174	WP_078909294_8 (pp) WP_107442966_6	39.0	72.5	1	pp	WP_078909294_8 (pp) WP_107442966_6	72.5
3175	WP_078909294_8 (pp) WP_057576508_4	38.0	71.25	1	pp	WP_078909294_8 (pp) WP_057576508_4	71.25
3176	WP_091553165_2 (pp) SCX58064_2	66.0	86.667	1	pp	WP_091553165_2 (pp) SCX58064_2	86.67
3177	WP_091553165_2 (pp) WP_091067169_2	67.0	90.476	1	pp	WP_091553165_2 (pp) WP_091067169_2	90.48
3178	WP_091553165_2 (pp) WP_092807119_2	66.0	86.667	1	pp	WP_091553165_2 (pp) WP_092807119_2	86.67
3179	WP_091067169_2 (pp) SCX58064_2	68.0	90.476	1	pp	WP_091067169_2 (pp) SCX58064_2	90.48
3180	WP_092807119_2 (pp) SCX58064_2	73.0	100.0	1	pp	WP_092807119_2 (pp) SCX58064_2	100.0
3181	WP_092807119_2 (pp) WP_091067169_2	68.0	90.476	1	pp	WP_092807119_2 (pp) WP_091067169_2	90.48
3182	OUE27579_2 (pp) WP_086513413_3	72.0	100.0	1	pp	OUE27579_2 (pp) WP_086513413_3	100.0
3183	OUE27579_2 (pp) WP_086513414_3	72.0	100.0	1	pp	OUE27579_2 (pp) WP_086513414_3	100.0
3184	OUE27579_2 (pp) OUE27580_2	72.0	100.0	1	pp	OUE27579_2 (pp) OUE27580_2	100.0
3185	WP_086513414_3 (pp) OUE27580_2	72.0	100.0	1	pp	WP_086513414_3 (pp) OUE27580_2	100.0
3186	WP_086513413_3 (pp) WP_086513414_3	72.0	100.0	1	pp	WP_086513413_3 (pp) WP_086513414_3	100.0
3187	WP_086513413_3 (pp) OUE27580_2	72.0	100.0	1	pp	WP_086513413_3 (pp) OUE27580_2	100.0
3188	WP_123601959_2 (pp) WP_120571834_1	20.0	79.545	1	pp	WP_123601959_2 (pp) WP_120571834_1	74.47
3189	WP_123601960_2 (pp) WP_120571834_1	20.0	79.545	1	pp	WP_123601960_2 (pp) WP_120571834_1	74.47
3190	WP_123601960_2 (pp) WP_123601959_2	31.0	100.0	1	pp	WP_123601960_2 (pp) WP_123601959_2	100.0
3191	WP_120571833_1 (pp) WP_120571834_1	30.0	100.0	1	pp	WP_120571833_1 (pp) WP_120571834_1	100.0
3192	WP_120571833_1 (pp) WP_123601959_2	20.0	79.545	1	pp	WP_120571833_1 (pp) WP_123601959_2	74.47
3193	WP_120571833_1 (pp) WP_123601960_2	20.0	79.545	1	pp	WP_120571833_1 (pp) WP_123601960_2	74.47
3194	WP_107657165_1 (pp) WP_132175704_2	15.0	75.758	1	pp	WP_107657165_1 (pp) WP_132175704_2	67.57
3195	WP_107657165_1 (pp) WP_135231520_2	24.0	100.0	1	pp	WP_107657165_1 (pp) WP_135231520_2	100.0
3196	WP_131965720_2 (pp) WP_132175704_2	23.0	100.0	1	pp	WP_131965720_2 (pp) WP_132175704_2	100.0
3197	WP_131965720_2 (pp) WP_135231520_2	15.0	75.758	1	pp	WP_131965720_2 (pp) WP_135231520_2	67.57
3198	WP_131965720_2 (pp) WP_107657165_1	15.0	75.758	1	pp	WP_131965720_2 (pp) WP_107657165_1	67.57
3199	WP_135231520_2 (pp) WP_132175704_2	15.0	75.758	1	pp	WP_135231520_2 (pp) WP_132175704_2	67.57
3200	KDN17331_1 (pp) WP_067592598_1	15.0	61.364	1	pp	KDN17331_1 (pp) WP_067592598_1	61.36
3201	KDN17331_1 (pp) WP_084093827_1	29.0	100.0	1	pp	KDN17331_1 (pp) WP_084093827_1	100.0
3202	KDN17331_1 (pp) WP_116200011_1	15.0	59.091	1	pp	KDN17331_1 (pp) WP_116200011_1	59.09
3203	WP_067592598_1 (pp) WP_084093827_1	15.0	61.364	1	pp	WP_067592598_1 (pp) WP_084093827_1	61.36
3204	WP_067592598_1 (pp) WP_116200011_1	26.0	95.455	1	pp	WP_067592598_1 (pp) WP_116200011_1	95.45
3205	WP_084093827_1 (pp) WP_116200011_1	15.0	59.091	1	pp	WP_084093827_1 (pp) WP_116200011_1	59.09
3206	OMC50887_1 (pp) OMC41183_1	50.0	98.667	1	pp	OMC50887_1 (pp) OMC41183_1	98.67
3207	OMC50887_1 (pp) WP_083679341_1	50.0	98.667	1	pp	OMC50887_1 (pp) WP_083679341_1	98.67
3208	OMC50887_1 (pp) WP_083667099_1	46.0	92.0	1	pp	OMC50887_1 (pp) WP_083667099_1	92.0
3209	WP_083679341_1 (pp) OMC41183_1	51.0	100.0	1	pp	WP_083679341_1 (pp) OMC41183_1	100.0
3210	WP_083667099_1 (pp) OMC41183_1	44.0	90.667	1	pp	WP_083667099_1 (pp) OMC41183_1	90.67
3211	WP_083667099_1 (pp) WP_083679341_1	44.0	90.667	1	pp	WP_083667099_1 (pp) WP_083679341_1	90.67
3212	WP_091040567_3 (pp) SDE51953_2	40.0	100.0	1	pp	WP_091040567_3 (pp) SDE51953_2	100.0
3213	WP_091040567_3 (pp) SDL22458_3	22.0	70.37	1	pp	WP_091040567_3 (pp) SDL22458_3	66.67
3214	WP_091040567_3 (pp) WP_091051455_3	22.0	70.37	1	pp	WP_091040567_3 (pp) WP_091051455_3	66.67
3215	WP_091051455_3 (pp) SDE51953_2	13.0	57.407	1	pp	WP_091051455_3 (pp) SDE51953_2	54.39
3216	WP_091051455_3 (pp) SDL22458_3	38.0	100.0	1	pp	WP_091051455_3 (pp) SDL22458_3	100.0
3217	SDE51953_2 (pp) SDL22458_3	22.0	70.37	1	pp	SDE51953_2 (pp) SDL22458_3	66.67
3218	SDE31545_5 (pp) WP_083191919_5	63.0	97.826	1	pp	SDE31545_5 (pp) WP_083191919_5	97.83
3219	SDE31545_5 (pp) KOG82578_3	62.0	95.789	1	pp	SDE31545_5 (pp) KOG82578_3	98.91
3220	KOU46944_2 (pp) WP_083191919_5	64.0	98.913	1	pp	KOU46944_2 (pp) WP_083191919_5	98.91
3221	KOU46944_2 (pp) SDE31545_5	64.0	98.913	1	pp	KOU46944_2 (pp) SDE31545_5	98.91
3222	KOU46944_2 (pp) KOG82578_3	62.0	96.842	1	pp	KOU46944_2 (pp) KOG82578_3	100.0
3223	KOG82578_3 (pp) WP_083191919_5	61.0	95.789	1	pp	KOG82578_3 (pp) WP_083191919_5	98.91
3224	SDY68794_1 (pp) WP_091216389_1	76.0	91.597	1	pp	SDY68794_1 (pp) WP_091216389_1	91.6
3225	SDY68794_1 (pp) SDL97273_1	76.0	91.597	1	pp	SDY68794_1 (pp) SDL97273_1	91.6
3226	SDL97273_1 (pp) WP_091216389_1	85.0	100.0	1	pp	SDL97273_1 (pp) WP_091216389_1	100.0
3227	WP_091159224_1 (pp) SDY68794_1	85.0	100.0	1	pp	WP_091159224_1 (pp) SDY68794_1	100.0
3228	WP_091159224_1 (pp) WP_091216389_1	76.0	91.597	1	pp	WP_091159224_1 (pp) WP_091216389_1	91.6
3229	WP_091159224_1 (pp) SDL97273_1	76.0	91.597	1	pp	WP_091159224_1 (pp) SDL97273_1	91.6
3230	WP_084211656_1 (pp) ODU05661_1	31.0	65.672	1	pp	WP_084211656_1 (pp) ODU05661_1	64.71
3231	WP_084211656_1 (pp) ALE82507_1	31.0	66.154	1	pp	WP_084211656_1 (pp) ALE82507_1	58.9
3232	WP_084211656_1 (pp) WP_132047282_3	17.0	47.143	1	pp	WP_084211656_1 (pp) WP_132047282_3	45.83
3233	ODU05661_1 (pp) ALE82507_1	38.0	77.612	1	pp	ODU05661_1 (pp) ALE82507_1	76.47
3234	WP_132047282_3 (pp) ODU05661_1	21.0	46.97	1	pp	WP_132047282_3 (pp) ODU05661_1	45.59
3235	WP_132047282_3 (pp) ALE82507_1	20.0	50.847	1	pp	WP_132047282_3 (pp) ALE82507_1	41.67
3236	WP_026174640_2 (pp) WP_082057091_1	11.0	40.323	1	pp	WP_026174640_2 (pp) WP_082057091_1	42.37
3237	WP_026174640_2 (pp) AJT41785_1	11.0	40.323	1	pp	WP_026174640_2 (pp) AJT41785_1	42.37
3238	SEB29931_2 (pp) AJT41785_1	14.0	55.932	1	pp	SEB29931_2 (pp) AJT41785_1	53.23
3239	SEC29390_3 (pp) SEB29931_2	16.0	58.065	1	pp	SEC29390_3 (pp) SEB29931_2	58.06
3240	SEC29390_3 (pp) AJT41785_1	16.0	60.0	1	pp	SEC29390_3 (pp) AJT41785_1	58.06
3241	WP_082057091_1 (pp) SEB29931_2	12.0	55.932	1	pp	WP_082057091_1 (pp) SEB29931_2	53.23
3242	WP_082057091_1 (pp) AJT41785_1	41.0	100.0	1	pp	WP_082057091_1 (pp) AJT41785_1	100.0
3243	WP_082057091_1 (pp) SEC29390_3	16.0	60.0	1	pp	WP_082057091_1 (pp) SEC29390_3	58.06
3244	WP_091289566_1 (pp) WP_091674323_1	13.0	61.538	1	pp	WP_091289566_1 (pp) WP_091674323_1	61.54
3245	WP_091289566_1 (pp) SFB39971_1	13.0	61.538	1	pp	WP_091289566_1 (pp) SFB39971_1	61.54
3246	WP_091289566_1 (pp) WP_091289566_2	23.0	100.0	1	pp	WP_091289566_1 (pp) WP_091289566_2	100.0
3247	WP_091289566_1 (pp) WP_091289566_3	23.0	97.436	1	pp	WP_091289566_1 (pp) WP_091289566_3	97.44
3248	SFB39971_1 (pp) WP_091674323_1	24.0	100.0	1	pp	SFB39971_1 (pp) WP_091674323_1	100.0
3249	SFB39971_1 (pp) WP_091289566_2	13.0	61.538	1	pp	SFB39971_1 (pp) WP_091289566_2	61.54
3250	SFB39971_1 (pp) WP_091289566_3	14.0	61.538	1	pp	SFB39971_1 (pp) WP_091289566_3	61.54
3251	WP_091289566_3 (pp) WP_091674323_1	14.0	61.538	1	pp	WP_091289566_3 (pp) WP_091674323_1	61.54
3252	WP_091289566_2 (pp) WP_091674323_1	13.0	61.538	1	pp	WP_091289566_2 (pp) WP_091674323_1	61.54
3253	WP_091289566_2 (pp) WP_091289566_3	23.0	97.436	1	pp	WP_091289566_2 (pp) WP_091289566_3	97.44
3254	OQM68597_1 (pp) WP_080684945_2	47.0	98.551	1	pp	OQM68597_1 (pp) WP_080684945_2	98.55
3255	OQM68597_1 (pp) WP_124284474_1	23.0	53.846	1	pp	OQM68597_1 (pp) WP_124284474_1	50.72
3256	OQM68597_1 (pp) WP_132339706_2	22.0	53.968	1	pp	OQM68597_1 (pp) WP_132339706_2	49.28
3257	OQM68597_1 (pp) WP_082248115_1	48.0	100.0	1	pp	OQM68597_1 (pp) WP_082248115_1	100.0
3258	WP_132339706_2 (pp) WP_080684945_2	22.0	53.968	1	pp	WP_132339706_2 (pp) WP_080684945_2	49.28
3259	WP_082248115_1 (pp) WP_080684945_2	47.0	98.551	1	pp	WP_082248115_1 (pp) WP_080684945_2	98.55
3260	WP_082248115_1 (pp) WP_132339706_2	22.0	53.968	1	pp	WP_082248115_1 (pp) WP_132339706_2	49.28
3261	WP_124284474_1 (pp) WP_080684945_2	23.0	53.846	1	pp	WP_124284474_1 (pp) WP_080684945_2	50.72
3262	WP_124284474_1 (pp) WP_132339706_2	34.0	71.642	1	pp	WP_124284474_1 (pp) WP_132339706_2	60.76
3263	WP_124284474_1 (pp) WP_082248115_1	23.0	53.846	1	pp	WP_124284474_1 (pp) WP_082248115_1	50.72
3264	WP_109092842_1 (pp) PWF27333_3	30.0	100.0	1	pp	WP_109092842_1 (pp) PWF27333_3	100.0
3265	WP_109092842_1 (pp) KTR94659_3	2.3	62.5	1	pp	WP_109092842_1 (pp) KTR94659_3	60.61
3266	WP_109092842_1 (pp) WP_081323045_3	2.3	62.5	1	pp	WP_109092842_1 (pp) WP_081323045_3	60.61
3267	WP_133246044_3 (pp) PWF27333_3	30.0	100.0	1	pp	WP_133246044_3 (pp) PWF27333_3	100.0
3268	WP_133246044_3 (pp) WP_109092842_1	30.0	100.0	1	pp	WP_133246044_3 (pp) WP_109092842_1	100.0
3269	WP_133246044_3 (pp) KTR94659_3	2.3	62.5	1	pp	WP_133246044_3 (pp) KTR94659_3	60.61
3270	WP_133246044_3 (pp) WP_081323045_3	2.3	62.5	1	pp	WP_133246044_3 (pp) WP_081323045_3	60.61
3271	WP_081323045_3 (pp) KTR94659_3	17.0	100.0	1	pp	WP_081323045_3 (pp) KTR94659_3	100.0
3272	PWF27333_3 (pp) KTR94659_3	2.3	62.5	1	pp	PWF27333_3 (pp) KTR94659_3	60.61
3273	PWF27333_3 (pp) WP_081323045_3	2.3	62.5	1	pp	PWF27333_3 (pp) WP_081323045_3	60.61
3274	PJJ39560_1 (pp) WP_100302786_1	73.0	100.0	1	pp	PJJ39560_1 (pp) WP_100302786_1	100.0
3275	PJJ39560_1 (pp) WP_078572841_1	73.0	100.0	1	pp	PJJ39560_1 (pp) WP_078572841_1	100.0
3276	PJJ39560_1 (pp) WP_078564093_1	61.0	82.353	1	pp	PJJ39560_1 (pp) WP_078564093_1	81.55
3277	PJJ39560_1 (pp) RZU94771_1	73.0	100.0	1	pp	PJJ39560_1 (pp) RZU94771_1	100.0
3278	WP_078572841_1 (pp) RZU94771_1	73.0	100.0	1	pp	WP_078572841_1 (pp) RZU94771_1	100.0
3279	WP_078564093_1 (pp) WP_078572841_1	61.0	82.353	1	pp	WP_078564093_1 (pp) WP_078572841_1	81.55
3280	WP_078564093_1 (pp) RZU94771_1	61.0	82.353	1	pp	WP_078564093_1 (pp) RZU94771_1	81.55
3281	WP_100302786_1 (pp) WP_078572841_1	73.0	100.0	1	pp	WP_100302786_1 (pp) WP_078572841_1	100.0
3282	WP_100302786_1 (pp) WP_078564093_1	61.0	82.353	1	pp	WP_100302786_1 (pp) WP_078564093_1	81.55
3283	WP_100302786_1 (pp) RZU94771_1	73.0	100.0	1	pp	WP_100302786_1 (pp) RZU94771_1	100.0
3284	SDC53518_2 (pp) WP_091365795_2	75.0	100.0	1	pp	SDC53518_2 (pp) WP_091365795_2	100.0
3285	SDC53518_2 (pp) SHF79230_2	63.0	84.404	1	pp	SDC53518_2 (pp) SHF79230_2	84.4
3286	SDC53518_2 (pp) WP_073419543_2	63.0	84.404	1	pp	SDC53518_2 (pp) WP_073419543_2	84.4
3287	SDC53518_2 (pp) WP_089404560_3	63.0	83.486	1	pp	SDC53518_2 (pp) WP_089404560_3	83.49
3288	WP_089404560_3 (pp) WP_091365795_2	63.0	83.486	1	pp	WP_089404560_3 (pp) WP_091365795_2	83.49
3289	WP_089404560_3 (pp) SHF79230_2	68.0	88.991	1	pp	WP_089404560_3 (pp) SHF79230_2	88.99
3290	WP_089404560_3 (pp) WP_073419543_2	68.0	88.991	1	pp	WP_089404560_3 (pp) WP_073419543_2	88.99
3291	WP_073419543_2 (pp) WP_091365795_2	63.0	84.404	1	pp	WP_073419543_2 (pp) WP_091365795_2	84.4
3292	SHF79230_2 (pp) WP_091365795_2	63.0	84.404	1	pp	SHF79230_2 (pp) WP_091365795_2	84.4
3293	SHF79230_2 (pp) WP_073419543_2	76.0	100.0	1	pp	SHF79230_2 (pp) WP_073419543_2	100.0
3294	WP_089298084_1 (pp) WP_046567642_1	33.0	46.429	1	pp	WP_089298084_1 (pp) WP_046567642_1	46.43
3295	WP_089298084_1 (pp) WP_089157775_1	33.0	45.536	1	pp	WP_089298084_1 (pp) WP_089157775_1	45.54
3296	WP_046567642_1 (pp) WP_093610459_1	23.0	48.544	1	pp	WP_046567642_1 (pp) WP_093610459_1	44.64
3297	PWK29583_1 (pp) WP_046567642_1	28.0	47.573	1	pp	PWK29583_1 (pp) WP_046567642_1	43.75
3298	PWK29583_1 (pp) WP_093610459_1	65.0	89.744	1	pp	PWK29583_1 (pp) WP_093610459_1	91.3
3299	WP_089157775_1 (pp) WP_046567642_1	75.0	95.536	1	pp	WP_089157775_1 (pp) WP_046567642_1	95.54
3300	WP_089157775_1 (pp) PWK29583_1	26.0	48.544	1	pp	WP_089157775_1 (pp) PWK29583_1	44.64
3301	WP_089157775_1 (pp) WP_093610459_1	24.0	50.485	1	pp	WP_089157775_1 (pp) WP_093610459_1	46.43
3302	AKS13949_2 (pp) WP_048589183_3	18.0	100.0	1	pp	AKS13949_2 (pp) WP_048589183_3	100.0
3303	AKS13949_2 (pp) AIG09585_3	17.0	96.667	1	pp	AKS13949_2 (pp) AIG09585_3	96.67
3304	AKS13949_2 (pp) AKP09252_3	18.0	100.0	1	pp	AKS13949_2 (pp) AKP09252_3	100.0
3305	WP_048589183_3 (pp) AIG09585_3	17.0	96.667	1	pp	WP_048589183_3 (pp) AIG09585_3	96.67
3306	WP_048589183_3 (pp) AKP09252_3	18.0	100.0	1	pp	WP_048589183_3 (pp) AKP09252_3	100.0
3307	AIG09585_3 (pp) AKP09252_3	17.0	96.667	1	pp	AIG09585_3 (pp) AKP09252_3	96.67
3308	AER69640_3 (pp) AKS13949_2	18.0	100.0	1	pp	AER69640_3 (pp) AKS13949_2	100.0
3309	AER69640_3 (pp) WP_048589183_3	18.0	100.0	1	pp	AER69640_3 (pp) WP_048589183_3	100.0
3310	AER69640_3 (pp) AIG09585_3	17.0	96.667	1	pp	AER69640_3 (pp) AIG09585_3	96.67
3311	AER69640_3 (pp) AKP09252_3	18.0	100.0	1	pp	AER69640_3 (pp) AKP09252_3	100.0
3312	WP_081384789_1 (pp) KQR47999_1	0.001	67.308	1	pp	WP_081384789_1 (pp) KQR47999_1	58.33
3313	WP_081384789_1 (pp) OLO48687_1	40.0	100.0	1	pp	WP_081384789_1 (pp) OLO48687_1	100.0
3314	WP_081384789_1 (pp) WP_075410821_9002	40.0	100.0	1	pp	WP_081384789_1 (pp) WP_075410821_9002	100.0
3315	WP_081384789_1 (pp) WP_082508744_1	0.001	67.308	1	pp	WP_081384789_1 (pp) WP_082508744_1	58.33
3316	OLO48687_1 (pp) KQR47999_1	0.001	67.308	1	pp	OLO48687_1 (pp) KQR47999_1	58.33
3317	OLO48687_1 (pp) WP_075410821_9002	40.0	100.0	1	pp	OLO48687_1 (pp) WP_075410821_9002	100.0
3318	OLO48687_1 (pp) WP_082508744_1	0.001	67.308	1	pp	OLO48687_1 (pp) WP_082508744_1	58.33
3319	WP_082508744_1 (pp) WP_075410821_9002	5.0	67.308	1	pp	WP_082508744_1 (pp) WP_075410821_9002	58.33
3320	KQR47999_1 (pp) WP_075410821_9002	5.0	67.308	1	pp	KQR47999_1 (pp) WP_075410821_9002	58.33
3321	KQR47999_1 (pp) WP_082508744_1	36.0	100.0	1	pp	KQR47999_1 (pp) WP_082508744_1	100.0
3322	WP_046085362_4 (pp) WP_078841030_4	19.0	88.889	1	pp	WP_046085362_4 (pp) WP_078841030_4	84.21
3323	WP_046085362_4 (pp) OPF84252_4	19.0	88.889	1	pp	WP_046085362_4 (pp) OPF84252_4	84.21
3324	WP_046085362_4 (pp) WP_078841030_2	16.0	82.051	1	pp	WP_046085362_4 (pp) WP_078841030_2	84.21
3325	WP_046085362_4 (pp) OPF84252_2	16.0	82.051	1	pp	WP_046085362_4 (pp) OPF84252_2	84.21
3326	WP_078841030_4 (pp) OPF84252_4	23.0	100.0	1	pp	WP_078841030_4 (pp) OPF84252_4	100.0
3327	WP_078841030_4 (pp) WP_078841030_2	15.0	90.625	1	pp	WP_078841030_4 (pp) WP_078841030_2	76.32
3328	WP_078841030_4 (pp) OPF84252_2	15.0	90.625	1	pp	WP_078841030_4 (pp) OPF84252_2	76.32
3329	OPF84252_4 (pp) OPF84252_2	15.0	90.625	1	pp	OPF84252_4 (pp) OPF84252_2	76.32
3330	WP_078841030_2 (pp) OPF84252_4	15.0	90.625	1	pp	WP_078841030_2 (pp) OPF84252_4	76.32
3331	WP_078841030_2 (pp) OPF84252_2	23.0	100.0	1	pp	WP_078841030_2 (pp) OPF84252_2	100.0
3332	WP_104820017_1 (pp) WP_051778263_1	28.0	86.792	1	pp	WP_104820017_1 (pp) WP_051778263_1	70.77
3333	WP_104820017_1 (pp) WP_104820017_2	33.0	93.846	1	pp	WP_104820017_1 (pp) WP_104820017_2	93.85
3334	WP_104820017_1 (pp) WP_057236399_1	29.0	85.455	1	pp	WP_104820017_1 (pp) WP_057236399_1	72.31
3335	WP_104820017_3 (pp) WP_051778263_1	28.0	86.792	1	pp	WP_104820017_3 (pp) WP_051778263_1	70.77
3336	WP_104820017_3 (pp) WP_104820017_1	43.0	100.0	1	pp	WP_104820017_3 (pp) WP_104820017_1	100.0
3337	WP_104820017_3 (pp) WP_104820017_2	33.0	93.846	1	pp	WP_104820017_3 (pp) WP_104820017_2	93.85
3338	WP_104820017_3 (pp) WP_057236399_1	29.0	85.455	1	pp	WP_104820017_3 (pp) WP_057236399_1	72.31
3339	WP_051778263_1 (pp) WP_057236399_1	34.0	94.203	1	pp	WP_051778263_1 (pp) WP_057236399_1	94.2
3340	WP_104820017_2 (pp) WP_051778263_1	29.0	85.185	1	pp	WP_104820017_2 (pp) WP_051778263_1	70.77
3341	WP_104820017_2 (pp) WP_057236399_1	28.0	84.906	1	pp	WP_104820017_2 (pp) WP_057236399_1	69.23
3342	WP_049563074_2 (pp) WP_057611617_3	8.5	45.455	0	pp	WP_049563074_2 (pp) WP_057611617_3	40.0
3343	WP_057611617_3 (pp) WP_018522479_2	54.0	72.115	1	pp	WP_057611617_3 (pp) WP_018522479_2	70.09
3344	WP_057611617_3 (pp) WP_028441277_2	48.0	67.308	1	pp	WP_057611617_3 (pp) WP_028441277_2	64.82
3345	WP_101404757_2 (pp) WP_057611617_3	66.0	83.333	1	pp	WP_101404757_2 (pp) WP_057611617_3	83.33
3346	WP_101404757_2 (pp) WP_018522479_2	54.0	72.381	1	pp	WP_101404757_2 (pp) WP_018522479_2	71.03
3347	WP_101404757_2 (pp) WP_028441277_2	48.0	66.667	1	pp	WP_101404757_2 (pp) WP_028441277_2	64.82
3348	WP_018522479_2 (pp) WP_028441277_2	57.0	75.238	1	pp	WP_018522479_2 (pp) WP_028441277_2	73.83
3349	ADD99586_6 (pp) EGR94682_5	39.0	100.0	1	pp	ADD99586_6 (pp) EGR94682_5	100.0
3350	WP_075371528_1 (pp) ADD99586_6	6.0	57.895	1	pp	WP_075371528_1 (pp) ADD99586_6	55.0
3351	WP_075371528_1 (pp) EGR94682_5	6.0	57.895	1	pp	WP_075371528_1 (pp) EGR94682_5	55.0
3352	ADD99586_1 (pp) ADD99586_6	5.0	54.386	1	pp	ADD99586_1 (pp) ADD99586_6	51.67
3353	ADD99586_1 (pp) EGR94682_5	5.0	54.386	1	pp	ADD99586_1 (pp) EGR94682_5	51.67
3354	ADD99586_1 (pp) WP_075371528_1	19.0	88.333	1	pp	ADD99586_1 (pp) WP_075371528_1	88.33
3355	EGR94682_2 (pp) ADD99586_6	5.0	54.386	1	pp	EGR94682_2 (pp) ADD99586_6	51.67
3356	EGR94682_2 (pp) EGR94682_5	5.0	54.386	1	pp	EGR94682_2 (pp) EGR94682_5	51.67
3357	EGR94682_2 (pp) WP_075371528_1	19.0	88.333	1	pp	EGR94682_2 (pp) WP_075371528_1	88.33
3358	EGR94682_2 (pp) ADD99586_1	38.0	100.0	1	pp	EGR94682_2 (pp) ADD99586_1	100.0
3359	WP_108724550_2 (pp) KPC95547_1	10.0	63.889	1	pp	WP_108724550_2 (pp) KPC95547_1	54.76
3360	WP_108724550_2 (pp) WP_107100134_1	10.0	56.098	1	pp	WP_108724550_2 (pp) WP_107100134_1	54.76
3361	WP_108724550_2 (pp) WP_031027146_2	10.0	74.074	1	pp	WP_108724550_2 (pp) WP_031027146_2	47.62
3362	WP_108724550_2 (pp) WP_110666035_1	11.0	54.348	1	pp	WP_108724550_2 (pp) WP_110666035_1	59.52
3363	KPC95547_1 (pp) WP_107100134_1	32.0	96.078	1	pp	KPC95547_1 (pp) WP_107100134_1	96.08
3364	KPC95547_1 (pp) WP_031027146_2	32.0	94.118	1	pp	KPC95547_1 (pp) WP_031027146_2	94.12
3365	KPC95547_1 (pp) WP_110666035_1	11.0	61.702	1	pp	KPC95547_1 (pp) WP_110666035_1	63.04
3366	WP_031027146_2 (pp) WP_107100134_1	32.0	94.118	1	pp	WP_031027146_2 (pp) WP_107100134_1	94.12
3367	WP_031027146_2 (pp) WP_110666035_1	12.0	59.574	1	pp	WP_031027146_2 (pp) WP_110666035_1	60.87
3368	WP_110666035_1 (pp) WP_107100134_1	12.0	61.905	1	pp	WP_110666035_1 (pp) WP_107100134_1	56.52
3369	EUA04475_3 (pp) WP_023370892_1	78.0	100.0	1	pp	EUA04475_3 (pp) WP_023370892_1	96.46
3370	EUA04475_3 (pp) OOK66964_2	73.0	99.02	1	pp	EUA04475_3 (pp) OOK66964_2	99.02
3371	EUA04475_3 (pp) WP_063469930_2	47.0	89.61	1	pp	EUA04475_3 (pp) WP_063469930_2	89.61
3372	EUA04475_3 (pp) WP_122441228_1	76.0	98.148	1	pp	EUA04475_3 (pp) WP_122441228_1	93.81
3373	WP_122441228_1 (pp) WP_023370892_1	80.0	98.214	1	pp	WP_122441228_1 (pp) WP_023370892_1	97.34
3374	WP_122441228_1 (pp) OOK66964_2	70.0	97.03	1	pp	WP_122441228_1 (pp) OOK66964_2	96.08
3375	WP_122441228_1 (pp) WP_063469930_2	47.0	92.0	1	pp	WP_122441228_1 (pp) WP_063469930_2	89.61
3376	WP_023370892_1 (pp) OOK66964_2	73.0	99.02	1	pp	WP_023370892_1 (pp) OOK66964_2	99.02
3377	WP_063469930_2 (pp) WP_023370892_1	48.0	89.61	1	pp	WP_063469930_2 (pp) WP_023370892_1	89.61
3378	WP_063469930_2 (pp) OOK66964_2	48.0	89.61	1	pp	WP_063469930_2 (pp) OOK66964_2	89.61
3379	WP_093640559_4 (pp) WP_126382680_3	0.003	48.837	1	pp	WP_093640559_4 (pp) WP_126382680_3	53.85
3380	WP_093640559_4 (pp) VEG28624_3	0.003	48.837	1	pp	WP_093640559_4 (pp) VEG28624_3	53.85
3381	WP_093640559_4 (pp) WP_056678071_6	0.087	43.59	1	pp	WP_093640559_4 (pp) WP_056678071_6	43.59
3382	WP_093640559_4 (pp) WP_055699111_7	7.0	62.963	0	pp	WP_093640559_4 (pp) WP_055699111_7	43.59
3383	VEG28624_3 (pp) WP_126382680_3	41.0	100.0	1	pp	VEG28624_3 (pp) WP_126382680_3	100.0
3384	WP_078966254_1 (pp) WP_128433746_1	27.0	47.573	1	pp	WP_078966254_1 (pp) WP_128433746_1	46.67
3385	WP_078966254_1 (pp) WP_050514186_1	52.0	73.585	1	pp	WP_078966254_1 (pp) WP_050514186_1	74.29
3386	WP_078966254_1 (pp) WP_050507047_1	53.0	75.926	1	pp	WP_078966254_1 (pp) WP_050507047_1	77.36
3387	WP_078966254_1 (pp) WP_099938361_1	50.0	75.0	1	pp	WP_078966254_1 (pp) WP_099938361_1	76.42
3388	WP_078966254_1 (pp) PIF99032_1	50.0	75.0	1	pp	WP_078966254_1 (pp) PIF99032_1	76.42
3389	PIF99032_1 (pp) WP_128433746_1	25.0	49.515	1	pp	PIF99032_1 (pp) WP_128433746_1	48.57
3390	PIF99032_1 (pp) WP_050514186_1	50.0	71.296	1	pp	PIF99032_1 (pp) WP_050514186_1	73.33
3391	PIF99032_1 (pp) WP_050507047_1	53.0	76.852	1	pp	PIF99032_1 (pp) WP_050507047_1	76.85
3392	PIF99032_1 (pp) WP_099938361_1	77.0	100.0	1	pp	PIF99032_1 (pp) WP_099938361_1	100.0
3393	WP_128433746_1 (pp) WP_050514186_1	28.0	50.0	1	pp	WP_128433746_1 (pp) WP_050514186_1	47.62
3394	WP_128433746_1 (pp) WP_050507047_1	29.0	48.148	1	pp	WP_128433746_1 (pp) WP_050507047_1	49.52
3395	WP_128433746_1 (pp) WP_099938361_1	28.0	49.515	1	pp	WP_128433746_1 (pp) WP_099938361_1	48.57
3396	WP_050514186_1 (pp) WP_099938361_1	50.0	71.296	1	pp	WP_050514186_1 (pp) WP_099938361_1	73.33
3397	WP_050507047_1 (pp) WP_050514186_1	58.0	83.333	1	pp	WP_050507047_1 (pp) WP_050514186_1	80.95
3398	WP_050507047_1 (pp) WP_099938361_1	53.0	76.852	1	pp	WP_050507047_1 (pp) WP_099938361_1	76.85
3399	WP_071967420_1 (pp) WP_030877129_1	23.0	48.421	1	pp	WP_071967420_1 (pp) WP_030877129_1	58.97
3400	WP_017557210_1 (pp) WP_071967420_1	29.0	64.384	1	pp	WP_017557210_1 (pp) WP_071967420_1	60.26
3401	WP_017557210_1 (pp) WP_030877129_1	36.0	59.551	1	pp	WP_017557210_1 (pp) WP_030877129_1	53.0
3402	WP_073700824_1 (pp) WP_071967420_1	32.0	72.857	1	pp	WP_073700824_1 (pp) WP_071967420_1	65.38
3403	WP_073700824_1 (pp) WP_017557210_1	36.0	70.238	1	pp	WP_073700824_1 (pp) WP_017557210_1	72.84
3404	WP_073700824_1 (pp) WP_030877129_1	26.0	63.014	1	pp	WP_073700824_1 (pp) WP_030877129_1	56.79
3405	WP_089254486_1 (pp) WP_073700824_1	5.0	48.649	0	pp	WP_089254486_1 (pp) WP_073700824_1	40.0
3406	WP_090799956_1 (pp) WP_089254486_1	13.0	84.444	1	pp	WP_090799956_1 (pp) WP_089254486_1	84.44
3407	WP_119286192_1 (pp) WP_051709136_1	68.0	84.685	1	pp	WP_119286192_1 (pp) WP_051709136_1	82.46
3408	WP_119286192_1 (pp) WP_127935985_6	31.0	69.863	1	pp	WP_119286192_1 (pp) WP_127935985_6	48.57
3409	WP_091094839_1 (pp) WP_119286192_1	47.0	64.22	1	pp	WP_091094839_1 (pp) WP_119286192_1	63.64
3410	WP_091094839_1 (pp) WP_093656413_1	46.0	63.303	1	pp	WP_091094839_1 (pp) WP_093656413_1	62.73
3411	WP_091094839_1 (pp) WP_051709136_1	46.0	62.385	1	pp	WP_091094839_1 (pp) WP_051709136_1	61.82
3412	WP_091094839_1 (pp) WP_127935985_6	33.0	68.056	1	pp	WP_091094839_1 (pp) WP_127935985_6	46.67
3413	WP_093656413_1 (pp) WP_119286192_1	69.0	85.841	1	pp	WP_093656413_1 (pp) WP_119286192_1	85.09
3414	WP_093656413_1 (pp) WP_051709136_1	71.0	87.611	1	pp	WP_093656413_1 (pp) WP_051709136_1	86.84
3415	WP_093656413_1 (pp) WP_127935985_6	31.0	68.493	1	pp	WP_093656413_1 (pp) WP_127935985_6	47.62
3416	WP_120688998_1 (pp) WP_119286192_1	46.0	63.303	1	pp	WP_120688998_1 (pp) WP_119286192_1	62.73
3417	WP_120688998_1 (pp) WP_091094839_1	69.0	88.182	1	pp	WP_120688998_1 (pp) WP_091094839_1	88.18
3418	WP_120688998_1 (pp) WP_093656413_1	47.0	65.138	1	pp	WP_120688998_1 (pp) WP_093656413_1	64.55
3419	WP_120688998_1 (pp) WP_051709136_1	45.0	62.385	1	pp	WP_120688998_1 (pp) WP_051709136_1	61.82
3420	WP_120688998_1 (pp) WP_127935985_6	34.0	69.444	1	pp	WP_120688998_1 (pp) WP_127935985_6	47.62
3421	WP_051709136_1 (pp) WP_127935985_6	33.0	71.233	1	pp	WP_051709136_1 (pp) WP_127935985_6	49.52
3422	WP_018962008_3 (pp) WP_018962008_2	57.0	100.0	1	pp	WP_018962008_3 (pp) WP_018962008_2	100.0
3423	WP_018962008_3 (pp) WP_084692311_3	7.0	41.975	1	pp	WP_018962008_3 (pp) WP_084692311_3	40.96
3424	WP_018962008_3 (pp) WP_084436210_1	18.0	48.193	1	pp	WP_018962008_3 (pp) WP_084436210_1	48.19
3425	WP_018962008_3 (pp) WP_084692314_1	7.0	41.975	1	pp	WP_018962008_3 (pp) WP_084692314_1	40.96
3426	WP_018962008_3 (pp) WP_028567914_3	17.0	49.296	1	pp	WP_018962008_3 (pp) WP_028567914_3	42.17
3427	WP_018962008_2 (pp) WP_084436210_1	18.0	48.193	1	pp	WP_018962008_2 (pp) WP_084436210_1	48.19
3428	WP_018962008_2 (pp) WP_084692314_1	7.0	41.975	1	pp	WP_018962008_2 (pp) WP_084692314_1	40.96
3429	WP_018962008_2 (pp) WP_028567914_3	17.0	49.296	1	pp	WP_018962008_2 (pp) WP_028567914_3	42.17
3430	WP_084692311_3 (pp) WP_018962008_2	7.0	41.975	1	pp	WP_084692311_3 (pp) WP_018962008_2	40.96
3431	WP_084692311_3 (pp) WP_084692314_1	85.0	100.0	1	pp	WP_084692311_3 (pp) WP_084692314_1	100.0
3432	WP_093655900_3 (pp) WP_124799873_1	39.0	64.198	1	pp	WP_093655900_3 (pp) WP_124799873_1	61.91
3433	WP_093849541_2 (pp) WP_093655900_3	57.0	95.238	1	pp	WP_093849541_2 (pp) WP_093655900_3	95.24
3434	WP_093849541_2 (pp) WP_027743449_1	46.0	76.19	1	pp	WP_093849541_2 (pp) WP_027743449_1	76.19
3435	WP_093849541_2 (pp) WP_124799873_1	41.0	66.667	1	pp	WP_093849541_2 (pp) WP_124799873_1	63.53
3436	WP_027743449_1 (pp) WP_093655900_3	47.0	78.571	1	pp	WP_027743449_1 (pp) WP_093655900_3	78.57
3437	WP_027743449_1 (pp) WP_124799873_1	35.0	58.537	1	pp	WP_027743449_1 (pp) WP_124799873_1	57.14
3438	WP_085014622_3 (pp) WP_093655900_3	39.0	66.667	1	pp	WP_085014622_3 (pp) WP_093655900_3	65.06
3439	WP_085014622_3 (pp) WP_093849541_2	40.0	66.667	1	pp	WP_085014622_3 (pp) WP_093849541_2	65.06
3440	WP_085014622_3 (pp) WP_027743449_1	36.0	61.25	1	pp	WP_085014622_3 (pp) WP_027743449_1	59.04
3441	WP_085014622_3 (pp) WP_124799873_1	40.0	63.855	1	pp	WP_085014622_3 (pp) WP_124799873_1	63.85
3442	WP_093766414_1 (pp) WP_093655900_3	53.0	89.157	1	pp	WP_093766414_1 (pp) WP_093655900_3	88.1
3443	WP_093766414_1 (pp) WP_093849541_2	52.0	87.952	1	pp	WP_093766414_1 (pp) WP_093849541_2	86.9
3444	WP_093766414_1 (pp) WP_027743449_1	49.0	82.5	1	pp	WP_093766414_1 (pp) WP_027743449_1	78.57
3445	WP_093766414_1 (pp) WP_124799873_1	38.0	62.963	1	pp	WP_093766414_1 (pp) WP_124799873_1	60.71
3446	WP_093766414_1 (pp) WP_085014622_3	37.0	63.415	1	pp	WP_093766414_1 (pp) WP_085014622_3	62.65
3447	WP_132388264_1 (pp) WP_132186409_1	63.0	88.462	1	pp	WP_132388264_1 (pp) WP_132186409_1	88.46
3448	WP_132388264_1 (pp) WP_132388266_1	74.0	100.0	1	pp	WP_132388264_1 (pp) WP_132388266_1	100.0
3449	WP_132388264_1 (pp) WP_132268319_1	63.0	91.429	1	pp	WP_132388264_1 (pp) WP_132268319_1	86.49
3450	WP_132388264_1 (pp) WP_132268317_1	63.0	91.429	1	pp	WP_132388264_1 (pp) WP_132268317_1	86.49
3451	WP_132388264_1 (pp) WP_132186408_1	63.0	88.462	1	pp	WP_132388264_1 (pp) WP_132186408_1	88.46
3452	WP_132186409_1 (pp) WP_132388266_1	63.0	88.462	1	pp	WP_132186409_1 (pp) WP_132388266_1	88.46
3453	WP_132186409_1 (pp) WP_132268317_1	60.0	85.577	1	pp	WP_132186409_1 (pp) WP_132268317_1	85.58
3454	WP_132186409_1 (pp) WP_132186408_1	70.0	100.0	1	pp	WP_132186409_1 (pp) WP_132186408_1	100.0
3455	WP_132268319_1 (pp) WP_132186409_1	60.0	85.577	1	pp	WP_132268319_1 (pp) WP_132186409_1	85.58
3456	WP_132268319_1 (pp) WP_132268317_1	81.0	100.0	1	pp	WP_132268319_1 (pp) WP_132268317_1	100.0
3457	WP_132268319_1 (pp) WP_132388266_1	64.0	87.719	1	pp	WP_132268319_1 (pp) WP_132388266_1	90.09
3458	WP_132268319_1 (pp) WP_132186408_1	60.0	85.577	1	pp	WP_132268319_1 (pp) WP_132186408_1	85.58
3459	WP_132186408_1 (pp) WP_132268317_1	60.0	85.577	1	pp	WP_132186408_1 (pp) WP_132268317_1	85.58
3460	WP_132388266_1 (pp) WP_132268317_1	63.0	91.429	1	pp	WP_132388266_1 (pp) WP_132268317_1	86.49
3461	WP_132388266_1 (pp) WP_132186408_1	63.0	88.462	1	pp	WP_132388266_1 (pp) WP_132186408_1	88.46
3462	WP_091247291_1 (pp) WP_092807119_1	23.0	43.137	1	pp	WP_091247291_1 (pp) WP_092807119_1	41.12
3463	WP_091247291_1 (pp) SDG90099_1	32.0	56.25	1	pp	WP_091247291_1 (pp) SDG90099_1	50.47
3464	WP_091247291_1 (pp) WP_091553165_1	27.0	60.638	1	pp	WP_091247291_1 (pp) WP_091553165_1	53.27
3465	WP_091247291_1 (pp) SCX58064_1	23.0	43.137	1	pp	WP_091247291_1 (pp) SCX58064_1	41.12
3466	WP_091247291_1 (pp) WP_091067169_1	32.0	56.25	1	pp	WP_091247291_1 (pp) WP_091067169_1	50.47
3467	WP_092807119_1 (pp) SDG90099_1	32.0	53.398	1	pp	WP_092807119_1 (pp) SDG90099_1	51.4
3468	WP_092807119_1 (pp) WP_091553165_1	24.0	47.573	1	pp	WP_092807119_1 (pp) WP_091553165_1	45.37
3469	WP_092807119_1 (pp) SCX58064_1	83.0	100.0	1	pp	WP_092807119_1 (pp) SCX58064_1	100.0
3470	WP_092807119_1 (pp) WP_091067169_1	32.0	53.398	1	pp	WP_092807119_1 (pp) WP_091067169_1	51.4
3471	SCX58064_1 (pp) WP_091553165_1	24.0	47.573	1	pp	SCX58064_1 (pp) WP_091553165_1	45.37
3472	SCX58064_1 (pp) WP_091067169_1	32.0	53.398	1	pp	SCX58064_1 (pp) WP_091067169_1	51.4
3473	SDG90099_1 (pp) WP_091553165_1	53.0	83.962	1	pp	SDG90099_1 (pp) WP_091553165_1	83.18
3474	SDG90099_1 (pp) SCX58064_1	32.0	53.398	1	pp	SDG90099_1 (pp) SCX58064_1	51.4
3475	SDG90099_1 (pp) WP_091067169_1	73.0	100.0	1	pp	SDG90099_1 (pp) WP_091067169_1	100.0
3476	WP_091067169_1 (pp) WP_091553165_1	53.0	83.962	1	pp	WP_091067169_1 (pp) WP_091553165_1	83.18
3477	WP_133437797_1 (pp) WP_055578070_3	41.0	95.455	1	pp	WP_133437797_1 (pp) WP_055578070_3	95.46
3478	WP_133437797_1 (pp) WP_083271029_2	41.0	96.97	1	pp	WP_133437797_1 (pp) WP_083271029_2	96.97
3479	WP_133437797_1 (pp) ODR23958_2	41.0	96.97	1	pp	WP_133437797_1 (pp) ODR23958_2	96.97
3480	WP_133437797_1 (pp) RUP01435_2	41.0	96.97	1	pp	WP_133437797_1 (pp) RUP01435_2	96.97
3481	WP_133437797_1 (pp) WP_085249702_2	36.0	87.5	1	pp	WP_133437797_1 (pp) WP_085249702_2	84.85
3482	WP_055578070_3 (pp) WP_083271029_2	41.0	95.455	1	pp	WP_055578070_3 (pp) WP_083271029_2	95.46
3483	WP_055578070_3 (pp) ODR23958_2	41.0	95.455	1	pp	WP_055578070_3 (pp) ODR23958_2	95.46
3484	WP_055578070_3 (pp) RUP01435_2	42.0	98.485	1	pp	WP_055578070_3 (pp) RUP01435_2	98.48
3485	WP_055578070_3 (pp) WP_085249702_2	36.0	85.938	1	pp	WP_055578070_3 (pp) WP_085249702_2	83.33
3486	RUP01435_2 (pp) WP_083271029_2	42.0	96.97	1	pp	RUP01435_2 (pp) WP_083271029_2	96.97
3487	RUP01435_2 (pp) WP_085249702_2	36.0	87.5	1	pp	RUP01435_2 (pp) WP_085249702_2	84.85
3488	WP_085249702_2 (pp) WP_083271029_2	36.0	87.5	1	pp	WP_085249702_2 (pp) WP_083271029_2	84.85
3489	ODR23958_2 (pp) WP_083271029_2	43.0	100.0	1	pp	ODR23958_2 (pp) WP_083271029_2	100.0
3490	ODR23958_2 (pp) RUP01435_2	42.0	96.97	1	pp	ODR23958_2 (pp) RUP01435_2	96.97
3491	ODR23958_2 (pp) WP_085249702_2	36.0	87.5	1	pp	ODR23958_2 (pp) WP_085249702_2	84.85
3492	SCL44965_3 (pp) WP_091094891_1	23.0	71.429	1	pp	SCL44965_3 (pp) WP_091094891_1	71.43
3493	SCL44965_3 (pp) SCL44965_2	23.0	71.429	1	pp	SCL44965_3 (pp) SCL44965_2	71.43
3494	SCL44965_3 (pp) WP_131761782_2	12.0	55.102	1	pp	SCL44965_3 (pp) WP_131761782_2	57.45
3495	SCL44965_3 (pp) WP_014176997_1	12.0	50.0	1	pp	SCL44965_3 (pp) WP_014176997_1	51.02
3496	SCL44965_3 (pp) WP_091030566_2	8.0	45.283	1	pp	SCL44965_3 (pp) WP_091030566_2	48.98
3497	SCL44965_2 (pp) WP_131761782_2	12.0	46.939	1	pp	SCL44965_2 (pp) WP_131761782_2	48.94
3498	SCL44965_2 (pp) WP_014176997_1	14.0	58.0	1	pp	SCL44965_2 (pp) WP_014176997_1	59.18
3499	WP_131761782_2 (pp) WP_014176997_1	18.0	64.0	1	pp	WP_131761782_2 (pp) WP_014176997_1	68.09
3500	WP_091094891_1 (pp) SCL44965_2	33.0	100.0	1	pp	WP_091094891_1 (pp) SCL44965_2	100.0
3501	WP_091094891_1 (pp) WP_131761782_2	12.0	46.939	1	pp	WP_091094891_1 (pp) WP_131761782_2	48.94
3502	WP_091094891_1 (pp) WP_014176997_1	14.0	58.0	1	pp	WP_091094891_1 (pp) WP_014176997_1	59.18
3503	WP_026413549_9004 (pp) WP_127935985_5	17.0	68.182	1	pp	WP_026413549_9004 (pp) WP_127935985_5	50.0
3504	WP_026413549_9004 (pp) WP_120688998_9002	24.0	86.538	1	pp	WP_026413549_9004 (pp) WP_120688998_9002	75.0
3505	WP_026413549_9004 (pp) AEM00621_9001	13.0	49.091	1	pp	WP_026413549_9004 (pp) AEM00621_9001	47.37
3506	WP_026413549_9004 (pp) WP_091094839_9004	24.0	86.538	1	pp	WP_026413549_9004 (pp) WP_091094839_9004	75.0
3507	WP_026413549_9004 (pp) WP_061921822_9003	13.0	49.091	1	pp	WP_026413549_9004 (pp) WP_061921822_9003	47.37
3508	WP_127935985_5 (pp) WP_120688998_9002	19.0	75.0	1	pp	WP_127935985_5 (pp) WP_120688998_9002	55.0
3509	WP_127935985_5 (pp) AEM00621_9001	10.0	42.105	1	pp	WP_127935985_5 (pp) AEM00621_9001	42.1
3510	WP_127935985_5 (pp) WP_091094839_9004	19.0	72.727	1	pp	WP_127935985_5 (pp) WP_091094839_9004	53.33
3511	WP_127935985_5 (pp) WP_061921822_9003	10.0	48.936	1	pp	WP_127935985_5 (pp) WP_061921822_9003	40.35
3512	WP_120688998_9002 (pp) AEM00621_9001	13.0	47.273	1	pp	WP_120688998_9002 (pp) AEM00621_9001	45.61
3513	WP_120688998_9002 (pp) WP_061921822_9003	13.0	47.273	1	pp	WP_120688998_9002 (pp) WP_061921822_9003	45.61
3514	WP_061921822_9003 (pp) AEM00621_9001	39.0	98.246	1	pp	WP_061921822_9003 (pp) AEM00621_9001	98.25
3515	WP_091094839_9004 (pp) WP_120688998_9002	39.0	96.721	1	pp	WP_091094839_9004 (pp) WP_120688998_9002	96.72
3516	WP_091094839_9004 (pp) AEM00621_9001	13.0	47.273	1	pp	WP_091094839_9004 (pp) AEM00621_9001	45.61
3517	WP_091094839_9004 (pp) WP_061921822_9003	13.0	47.273	1	pp	WP_091094839_9004 (pp) WP_061921822_9003	45.61
3518	WP_085014622_5 (pp) WP_027743449_6	22.0	75.472	1	pp	WP_085014622_5 (pp) WP_027743449_6	75.47
3519	WP_085014622_5 (pp) WP_117228578_2	12.0	62.791	1	pp	WP_085014622_5 (pp) WP_117228578_2	50.94
3520	WP_085014622_5 (pp) WP_035849420_6	20.0	71.698	1	pp	WP_085014622_5 (pp) WP_035849420_6	71.7
3521	WP_085014622_5 (pp) WP_109186559_2	20.0	69.811	1	pp	WP_085014622_5 (pp) WP_109186559_2	69.81
3522	WP_117228579_2 (pp) WP_117228578_2	40.0	100.0	1	pp	WP_117228579_2 (pp) WP_117228578_2	100.0
3523	WP_117228579_2 (pp) WP_085014622_5	12.0	62.791	1	pp	WP_117228579_2 (pp) WP_085014622_5	50.94
3524	WP_117228579_2 (pp) WP_035849420_6	8.0	50.0	1	pp	WP_117228579_2 (pp) WP_035849420_6	40.0
3525	WP_117228579_2 (pp) WP_109186559_2	13.0	56.818	1	pp	WP_117228579_2 (pp) WP_109186559_2	44.64
3526	WP_035849420_6 (pp) WP_027743449_6	20.0	69.231	1	pp	WP_035849420_6 (pp) WP_027743449_6	65.45
3527	WP_109186559_2 (pp) WP_027743449_6	25.0	74.074	1	pp	WP_109186559_2 (pp) WP_027743449_6	71.43
3528	WP_109186559_2 (pp) WP_035849420_6	19.0	64.151	1	pp	WP_109186559_2 (pp) WP_035849420_6	61.82
3529	WP_117228578_2 (pp) WP_035849420_6	8.0	50.0	1	pp	WP_117228578_2 (pp) WP_035849420_6	40.0
3530	WP_117228578_2 (pp) WP_109186559_2	13.0	56.818	1	pp	WP_117228578_2 (pp) WP_109186559_2	44.64
3531	WP_049804670_1 (pp) WP_117228578_1	19.0	85.714	1	pp	WP_049804670_1 (pp) WP_117228578_1	85.71
3532	WP_049804670_1 (pp) WP_117228580_1	19.0	85.714	1	pp	WP_049804670_1 (pp) WP_117228580_1	85.71
3533	WP_049804670_1 (pp) WP_013865884_1	22.0	100.0	1	pp	WP_049804670_1 (pp) WP_013865884_1	100.0
3534	WP_117228578_1 (pp) WP_117228580_1	22.0	100.0	1	pp	WP_117228578_1 (pp) WP_117228580_1	100.0
3535	WP_117228578_1 (pp) WP_013865884_1	19.0	85.714	1	pp	WP_117228578_1 (pp) WP_013865884_1	85.71
3536	WP_117228580_1 (pp) WP_013865884_1	19.0	85.714	1	pp	WP_117228580_1 (pp) WP_013865884_1	85.71
3537	WP_117228579_1 (pp) WP_117228578_1	22.0	100.0	1	pp	WP_117228579_1 (pp) WP_117228578_1	100.0
3538	WP_117228579_1 (pp) WP_049804670_1	19.0	85.714	1	pp	WP_117228579_1 (pp) WP_049804670_1	85.71
3539	WP_117228579_1 (pp) WP_117228580_1	22.0	100.0	1	pp	WP_117228579_1 (pp) WP_117228580_1	100.0
3540	WP_117228579_1 (pp) WP_013865884_1	19.0	85.714	1	pp	WP_117228579_1 (pp) WP_013865884_1	85.71
3541	BAK38069_1 (pp) WP_049804670_1	22.0	100.0	1	pp	BAK38069_1 (pp) WP_049804670_1	100.0
3542	BAK38069_1 (pp) WP_117228578_1	19.0	85.714	1	pp	BAK38069_1 (pp) WP_117228578_1	85.71
3543	BAK38069_1 (pp) WP_117228580_1	19.0	85.714	1	pp	BAK38069_1 (pp) WP_117228580_1	85.71
3544	BAK38069_1 (pp) WP_013865884_1	22.0	100.0	1	pp	BAK38069_1 (pp) WP_013865884_1	100.0
3545	BAK38069_1 (pp) WP_117228579_1	19.0	85.714	1	pp	BAK38069_1 (pp) WP_117228579_1	85.71
3546	WP_013865882_1 (pp) WP_049804670_1	22.0	100.0	1	pp	WP_013865882_1 (pp) WP_049804670_1	100.0
3547	WP_013865882_1 (pp) WP_117228578_1	19.0	85.714	1	pp	WP_013865882_1 (pp) WP_117228578_1	85.71
3548	WP_013865882_1 (pp) WP_117228580_1	19.0	85.714	1	pp	WP_013865882_1 (pp) WP_117228580_1	85.71
3549	WP_013865882_1 (pp) WP_013865884_1	22.0	100.0	1	pp	WP_013865882_1 (pp) WP_013865884_1	100.0
3550	WP_013865882_1 (pp) WP_117228579_1	19.0	85.714	1	pp	WP_013865882_1 (pp) WP_117228579_1	85.71
3551	WP_013865882_1 (pp) BAK38069_1	22.0	100.0	1	pp	WP_013865882_1 (pp) BAK38069_1	100.0
3552	WP_076824657_2 (pp) WP_091272827_3	54.0	97.701	1	pp	WP_076824657_2 (pp) WP_091272827_3	97.7
3553	WP_076824657_2 (pp) WP_091272829_3	54.0	97.701	1	pp	WP_076824657_2 (pp) WP_091272829_3	97.7
3554	WP_076824657_2 (pp) WP_131626375_3	29.0	78.667	1	pp	WP_076824657_2 (pp) WP_131626375_3	67.82
3555	WP_124003201_2 (pp) RPE52214_2	80.0	100.0	1	pp	WP_124003201_2 (pp) RPE52214_2	100.0
3556	WP_124003201_2 (pp) WP_124003633_2	80.0	100.0	1	pp	WP_124003201_2 (pp) WP_124003633_2	100.0
3557	WP_091272829_3 (pp) RPE52214_2	17.0	56.25	1	pp	WP_091272829_3 (pp) RPE52214_2	41.38
3558	WP_091272829_3 (pp) WP_124003201_2	17.0	56.25	1	pp	WP_091272829_3 (pp) WP_124003201_2	41.38
3559	WP_091272829_3 (pp) WP_131626375_3	30.0	81.333	1	pp	WP_091272829_3 (pp) WP_131626375_3	70.11
3560	WP_091272829_3 (pp) WP_124003633_2	17.0	56.25	1	pp	WP_091272829_3 (pp) WP_124003633_2	41.38
3561	WP_091272827_3 (pp) WP_124003201_2	17.0	56.25	1	pp	WP_091272827_3 (pp) WP_124003201_2	41.38
3562	WP_091272827_3 (pp) RPE52214_2	17.0	56.25	1	pp	WP_091272827_3 (pp) RPE52214_2	41.38
3563	WP_091272827_3 (pp) WP_091272829_3	54.0	100.0	1	pp	WP_091272827_3 (pp) WP_091272829_3	100.0
3564	WP_091272827_3 (pp) WP_131626375_3	30.0	81.333	1	pp	WP_091272827_3 (pp) WP_131626375_3	70.11
3565	WP_091272827_3 (pp) WP_124003633_2	17.0	56.25	1	pp	WP_091272827_3 (pp) WP_124003633_2	41.38
3566	WP_124003633_2 (pp) RPE52214_2	80.0	100.0	1	pp	WP_124003633_2 (pp) RPE52214_2	100.0
3567	WP_103517755_2 (pp) WP_115914639_1	25.0	68.966	1	pp	WP_103517755_2 (pp) WP_115914639_1	70.18
3568	WP_103517755_2 (pp) WP_071377378_1	25.0	70.69	1	pp	WP_103517755_2 (pp) WP_071377378_1	71.93
3569	WP_103517755_2 (pp) WP_054222272_1	30.0	78.947	1	pp	WP_103517755_2 (pp) WP_054222272_1	78.95
3570	WP_103517755_2 (pp) WP_084415984_2	21.0	56.14	1	pp	WP_103517755_2 (pp) WP_084415984_2	56.14
3571	WP_103517755_2 (pp) WP_018550650_1	38.0	100.0	1	pp	WP_103517755_2 (pp) WP_018550650_1	100.0
3572	WP_103517755_2 (pp) WP_051386825_1	37.0	98.246	1	pp	WP_103517755_2 (pp) WP_051386825_1	98.25
3573	WP_051386825_1 (pp) WP_115914639_1	25.0	70.69	1	pp	WP_051386825_1 (pp) WP_115914639_1	71.93
3574	WP_051386825_1 (pp) WP_071377378_1	26.0	72.414	1	pp	WP_051386825_1 (pp) WP_071377378_1	73.68
3575	WP_051386825_1 (pp) WP_084415984_2	21.0	57.895	1	pp	WP_051386825_1 (pp) WP_084415984_2	57.89
3576	WP_051386825_1 (pp) WP_018550650_1	37.0	98.246	1	pp	WP_051386825_1 (pp) WP_018550650_1	98.25
3577	WP_054222272_1 (pp) WP_115914639_1	26.0	75.862	1	pp	WP_054222272_1 (pp) WP_115914639_1	77.19
3578	WP_054222272_1 (pp) WP_071377378_1	24.0	70.69	1	pp	WP_054222272_1 (pp) WP_071377378_1	71.93
3579	WP_054222272_1 (pp) WP_084415984_2	23.0	63.158	1	pp	WP_054222272_1 (pp) WP_084415984_2	63.16
3580	WP_054222272_1 (pp) WP_018550650_1	30.0	78.947	1	pp	WP_054222272_1 (pp) WP_018550650_1	78.95
3581	WP_054222272_1 (pp) WP_051386825_1	30.0	80.702	1	pp	WP_054222272_1 (pp) WP_051386825_1	80.7
3582	WP_071377378_1 (pp) WP_115914639_1	35.0	93.103	1	pp	WP_071377378_1 (pp) WP_115914639_1	93.1
3583	WP_084415984_2 (pp) WP_115914639_1	18.0	53.448	1	pp	WP_084415984_2 (pp) WP_115914639_1	54.39
3584	WP_084415984_2 (pp) WP_071377378_1	17.0	53.448	1	pp	WP_084415984_2 (pp) WP_071377378_1	54.39
3585	WP_018550650_1 (pp) WP_115914639_1	25.0	68.966	1	pp	WP_018550650_1 (pp) WP_115914639_1	70.18
3586	WP_018550650_1 (pp) WP_071377378_1	25.0	70.69	1	pp	WP_018550650_1 (pp) WP_071377378_1	71.93
3587	WP_018550650_1 (pp) WP_084415984_2	21.0	56.14	1	pp	WP_018550650_1 (pp) WP_084415984_2	56.14
3588	WP_004004118_2 (pp) WP_104263679_2	19.0	47.778	1	pp	WP_004004118_2 (pp) WP_104263679_2	46.24
3589	WP_004004118_2 (pp) WP_035849418_3	44.0	67.327	1	pp	WP_004004118_2 (pp) WP_035849418_3	66.02
3590	WP_004004118_2 (pp) WP_084011357_4	34.0	61.957	1	pp	WP_004004118_2 (pp) WP_084011357_4	55.34
3591	WP_004004118_2 (pp) WP_045877303_4	34.0	61.957	1	pp	WP_004004118_2 (pp) WP_045877303_4	55.34
3592	WP_004004118_2 (pp) WP_035849420_5	44.0	67.327	1	pp	WP_004004118_2 (pp) WP_035849420_5	66.02
3593	WP_004004118_2 (pp) WP_067284698_2	64.0	89.32	1	pp	WP_004004118_2 (pp) WP_067284698_2	89.32
3594	WP_035849420_5 (pp) WP_104263679_2	19.0	50.0	1	pp	WP_035849420_5 (pp) WP_104263679_2	49.46
3595	WP_035849420_5 (pp) WP_035849418_3	70.0	100.0	1	pp	WP_035849420_5 (pp) WP_035849418_3	100.0
3596	WP_035849420_5 (pp) WP_045877303_4	32.0	61.364	1	pp	WP_035849420_5 (pp) WP_045877303_4	52.43
3597	WP_035849420_5 (pp) WP_067284698_2	43.0	68.317	1	pp	WP_035849420_5 (pp) WP_067284698_2	66.99
3598	WP_084011357_4 (pp) WP_035849418_3	33.0	59.574	1	pp	WP_084011357_4 (pp) WP_035849418_3	54.37
3599	WP_084011357_4 (pp) WP_045877303_4	70.0	100.0	1	pp	WP_084011357_4 (pp) WP_045877303_4	100.0
3600	WP_084011357_4 (pp) WP_035849420_5	33.0	59.574	1	pp	WP_084011357_4 (pp) WP_035849420_5	54.37
3601	WP_084011357_4 (pp) WP_067284698_2	34.0	60.638	1	pp	WP_084011357_4 (pp) WP_067284698_2	55.34
3602	WP_045877303_4 (pp) WP_035849418_3	33.0	59.574	1	pp	WP_045877303_4 (pp) WP_035849418_3	54.37
3603	WP_067284698_2 (pp) WP_035849418_3	43.0	68.317	1	pp	WP_067284698_2 (pp) WP_035849418_3	66.99
3604	WP_067284698_2 (pp) WP_045877303_4	33.0	60.87	1	pp	WP_067284698_2 (pp) WP_045877303_4	54.37
3605	WP_104263679_2 (pp) WP_035849418_3	25.0	50.0	1	pp	WP_104263679_2 (pp) WP_035849418_3	49.46
3606	WP_104263679_2 (pp) WP_084011357_4	21.0	47.727	1	pp	WP_104263679_2 (pp) WP_084011357_4	45.16
3607	WP_104263679_2 (pp) WP_045877303_4	21.0	47.727	1	pp	WP_104263679_2 (pp) WP_045877303_4	45.16
3608	WP_104263679_2 (pp) WP_067284698_2	24.0	49.438	1	pp	WP_104263679_2 (pp) WP_067284698_2	47.31
3609	WP_057576508_3 (pp) WP_078909294_7	17.0	69.492	1	pp	WP_057576508_3 (pp) WP_078909294_7	69.49
3610	WP_031012255_1 (pp) WP_057576508_3	17.0	63.158	1	pp	WP_031012255_1 (pp) WP_057576508_3	61.02
3611	WP_031012255_1 (pp) WP_078909294_7	10.0	54.386	1	pp	WP_031012255_1 (pp) WP_078909294_7	52.54
3612	WP_031012255_1 (pp) WP_107442966_5	11.0	63.158	1	pp	WP_031012255_1 (pp) WP_107442966_5	61.02
3613	SDN00667_2 (pp) WP_090014707_2	14.0	100.0	1	pp	SDN00667_2 (pp) WP_090014707_2	100.0
3614	SDN00667_2 (pp) WP_107442966_5	1.6	57.143	0	pp	SDN00667_2 (pp) WP_107442966_5	44.44
3615	WP_107442966_5 (pp) WP_057576508_3	33.0	93.22	1	pp	WP_107442966_5 (pp) WP_057576508_3	93.22
3616	WP_107442966_5 (pp) WP_078909294_7	16.0	69.492	1	pp	WP_107442966_5 (pp) WP_078909294_7	69.49
3617	WP_107442966_5 (pp) WP_015618321_1	5.0	44.444	1	pp	WP_107442966_5 (pp) WP_015618321_1	40.68
3618	WP_090014707_2 (pp) WP_107442966_5	1.6	57.143	0	pp	WP_090014707_2 (pp) WP_107442966_5	44.44
3619	SEC38602_2 (pp) WP_125813086_2	26.0	86.957	1	pp	SEC38602_2 (pp) WP_125813086_2	86.96
3620	SEC38602_2 (pp) WP_126898321_2	29.0	97.826	1	pp	SEC38602_2 (pp) WP_126898321_2	97.83
3621	SEC38602_2 (pp) WP_092779820_1	8.0	50.0	1	pp	SEC38602_2 (pp) WP_092779820_1	41.3
3622	WP_086824496_1 (pp) WP_030432198_1	16.0	72.727	1	pp	WP_086824496_1 (pp) WP_030432198_1	57.14
3623	WP_086824496_1 (pp) WP_092779820_1	12.0	48.718	1	pp	WP_086824496_1 (pp) WP_092779820_1	42.22
3624	WP_121394015_1 (pp) SEC38602_2	8.0	50.0	1	pp	WP_121394015_1 (pp) SEC38602_2	41.3
3625	WP_121394015_1 (pp) WP_086824496_1	12.0	48.718	1	pp	WP_121394015_1 (pp) WP_086824496_1	42.22
3626	WP_121394015_1 (pp) WP_030432198_1	14.0	63.158	1	pp	WP_121394015_1 (pp) WP_030432198_1	57.14
3627	WP_121394015_1 (pp) WP_126898321_2	8.0	50.0	1	pp	WP_121394015_1 (pp) WP_126898321_2	41.3
3628	WP_121394015_1 (pp) WP_092779820_1	34.0	94.444	1	pp	WP_121394015_1 (pp) WP_092779820_1	92.73
3629	WP_126898321_2 (pp) WP_125813086_2	26.0	84.783	1	pp	WP_126898321_2 (pp) WP_125813086_2	84.78
3630	WP_126898321_2 (pp) WP_092779820_1	8.0	50.0	1	pp	WP_126898321_2 (pp) WP_092779820_1	41.3
3631	WP_030432198_1 (pp) WP_092779820_1	14.0	63.158	1	pp	WP_030432198_1 (pp) WP_092779820_1	57.14
3632	WP_089157775_2 (pp) WP_088972034_1	61.0	83.333	1	pp	WP_089157775_2 (pp) WP_088972034_1	83.33
3633	WP_089157775_2 (pp) WP_120728438_1	58.0	80.833	1	pp	WP_089157775_2 (pp) WP_120728438_1	80.83
3634	WP_089157775_2 (pp) WP_088988891_1	56.0	88.333	1	pp	WP_089157775_2 (pp) WP_088988891_1	88.33
3635	WP_089157775_2 (pp) WP_088948967_1	48.0	84.685	1	pp	WP_089157775_2 (pp) WP_088948967_1	84.69
3636	WP_089157775_2 (pp) WP_046567642_2	62.0	84.167	1	pp	WP_089157775_2 (pp) WP_046567642_2	84.17
3637	WP_067306280_1 (pp) WP_088972034_1	60.0	83.333	1	pp	WP_067306280_1 (pp) WP_088972034_1	83.33
3638	WP_067306280_1 (pp) WP_120728438_1	58.0	80.0	1	pp	WP_067306280_1 (pp) WP_120728438_1	80.0
3639	WP_067306280_1 (pp) WP_088988891_1	52.0	80.833	1	pp	WP_067306280_1 (pp) WP_088988891_1	80.83
3640	WP_067306280_1 (pp) WP_088948967_1	45.0	79.279	1	pp	WP_067306280_1 (pp) WP_088948967_1	79.28
3641	WP_067306280_1 (pp) WP_089157775_2	54.0	84.167	1	pp	WP_067306280_1 (pp) WP_089157775_2	84.17
3642	WP_067306280_1 (pp) WP_046567642_2	60.0	82.5	1	pp	WP_067306280_1 (pp) WP_046567642_2	82.5
3643	WP_088972034_1 (pp) WP_088988891_1	60.0	87.5	1	pp	WP_088972034_1 (pp) WP_088988891_1	87.5
3644	WP_088972034_1 (pp) WP_120728438_1	55.0	77.5	1	pp	WP_088972034_1 (pp) WP_120728438_1	77.5
3645	WP_120728438_1 (pp) WP_088988891_1	53.0	82.5	1	pp	WP_120728438_1 (pp) WP_088988891_1	82.5
3646	WP_046567642_2 (pp) WP_088972034_1	70.0	93.333	1	pp	WP_046567642_2 (pp) WP_088972034_1	93.33
3647	WP_046567642_2 (pp) WP_088988891_1	60.0	89.167	1	pp	WP_046567642_2 (pp) WP_088988891_1	89.17
3648	WP_046567642_2 (pp) WP_120728438_1	57.0	79.167	1	pp	WP_046567642_2 (pp) WP_120728438_1	79.17
3649	WP_088948967_1 (pp) WP_088972034_1	56.0	83.784	1	pp	WP_088948967_1 (pp) WP_088972034_1	83.78
3650	WP_088948967_1 (pp) WP_088988891_1	54.0	91.892	1	pp	WP_088948967_1 (pp) WP_088988891_1	91.89
3651	WP_088948967_1 (pp) WP_120728438_1	53.0	81.081	1	pp	WP_088948967_1 (pp) WP_120728438_1	81.08
3652	WP_088948967_1 (pp) WP_046567642_2	58.0	86.486	1	pp	WP_088948967_1 (pp) WP_046567642_2	86.49
3653	WP_114055833_1 (pp) WP_053787331_1	17.0	84.615	1	pp	WP_114055833_1 (pp) WP_053787331_1	84.62
3654	WP_114055833_1 (pp) WP_103491678_3	16.0	82.051	1	pp	WP_114055833_1 (pp) WP_103491678_3	82.05
3655	WP_114055833_1 (pp) TDU80263_1	17.0	84.615	1	pp	WP_114055833_1 (pp) TDU80263_1	84.62
3656	WP_114055833_1 (pp) WP_125541988_1	20.0	100.0	1	pp	WP_114055833_1 (pp) WP_125541988_1	100.0
3657	WP_114055833_1 (pp) WP_030633187_2	16.0	82.051	1	pp	WP_114055833_1 (pp) WP_030633187_2	82.05
3658	WP_086845754_2 (pp) WP_053787331_1	11.0	92.857	1	pp	WP_086845754_2 (pp) WP_053787331_1	66.67
3659	WP_086845754_2 (pp) WP_103491678_3	11.0	89.286	1	pp	WP_086845754_2 (pp) WP_103491678_3	64.1
3660	WP_086845754_2 (pp) TDU80263_1	11.0	92.857	1	pp	WP_086845754_2 (pp) TDU80263_1	66.67
3661	WP_086845754_2 (pp) WP_114055833_1	12.0	75.0	1	pp	WP_086845754_2 (pp) WP_114055833_1	84.62
3662	WP_086845754_2 (pp) WP_125541988_1	12.0	75.0	1	pp	WP_086845754_2 (pp) WP_125541988_1	84.62
3663	WP_086845754_2 (pp) WP_030633187_2	11.0	89.286	1	pp	WP_086845754_2 (pp) WP_030633187_2	64.1
3664	TDU80263_1 (pp) WP_053787331_1	21.0	100.0	1	pp	TDU80263_1 (pp) WP_053787331_1	100.0
3665	TDU80263_1 (pp) WP_103491678_3	19.0	92.308	1	pp	TDU80263_1 (pp) WP_103491678_3	92.31
3666	TDU80263_1 (pp) WP_030633187_2	19.0	92.308	1	pp	TDU80263_1 (pp) WP_030633187_2	92.31
3667	WP_125541988_1 (pp) WP_053787331_1	17.0	84.615	1	pp	WP_125541988_1 (pp) WP_053787331_1	84.62
3668	WP_125541988_1 (pp) WP_103491678_3	16.0	82.051	1	pp	WP_125541988_1 (pp) WP_103491678_3	82.05
3669	WP_125541988_1 (pp) TDU80263_1	17.0	84.615	1	pp	WP_125541988_1 (pp) TDU80263_1	84.62
3670	WP_125541988_1 (pp) WP_030633187_2	16.0	82.051	1	pp	WP_125541988_1 (pp) WP_030633187_2	82.05
3671	WP_053787331_1 (pp) WP_103491678_3	19.0	92.308	1	pp	WP_053787331_1 (pp) WP_103491678_3	92.31
3672	WP_030633187_2 (pp) WP_103491678_3	21.0	100.0	1	pp	WP_030633187_2 (pp) WP_103491678_3	100.0
3673	WP_030633187_2 (pp) WP_053787331_1	19.0	92.308	1	pp	WP_030633187_2 (pp) WP_053787331_1	92.31
3674	WP_078564093_2 (pp) PJJ39560_2	30.0	90.0	1	pp	WP_078564093_2 (pp) PJJ39560_2	90.0
3675	WP_078564093_2 (pp) WP_078572841_2	29.0	90.0	1	pp	WP_078564093_2 (pp) WP_078572841_2	90.0
3676	WP_078564093_2 (pp) WP_100302786_2	30.0	90.0	1	pp	WP_078564093_2 (pp) WP_100302786_2	90.0
3677	WP_078564093_2 (pp) WP_052770273_1	29.0	90.0	1	pp	WP_078564093_2 (pp) WP_052770273_1	90.0
3678	WP_078564093_2 (pp) AKH86621_1	29.0	90.0	1	pp	WP_078564093_2 (pp) AKH86621_1	90.0
3679	WP_078564093_2 (pp) RZU94771_2	29.0	90.0	1	pp	WP_078564093_2 (pp) RZU94771_2	90.0
3680	WP_078572841_2 (pp) AKH86621_1	28.0	88.0	1	pp	WP_078572841_2 (pp) AKH86621_1	88.0
3681	PJJ39560_2 (pp) WP_078572841_2	32.0	98.0	1	pp	PJJ39560_2 (pp) WP_078572841_2	98.0
3682	PJJ39560_2 (pp) AKH86621_1	29.0	88.0	1	pp	PJJ39560_2 (pp) AKH86621_1	88.0
3683	WP_100302786_2 (pp) PJJ39560_2	32.0	100.0	1	pp	WP_100302786_2 (pp) PJJ39560_2	100.0
3684	WP_100302786_2 (pp) WP_078572841_2	32.0	98.0	1	pp	WP_100302786_2 (pp) WP_078572841_2	98.0
3685	WP_100302786_2 (pp) AKH86621_1	29.0	88.0	1	pp	WP_100302786_2 (pp) AKH86621_1	88.0
3686	WP_052770273_1 (pp) PJJ39560_2	29.0	88.0	1	pp	WP_052770273_1 (pp) PJJ39560_2	88.0
3687	WP_052770273_1 (pp) WP_078572841_2	28.0	88.0	1	pp	WP_052770273_1 (pp) WP_078572841_2	88.0
3688	WP_052770273_1 (pp) WP_100302786_2	29.0	88.0	1	pp	WP_052770273_1 (pp) WP_100302786_2	88.0
3689	WP_052770273_1 (pp) AKH86621_1	32.0	100.0	1	pp	WP_052770273_1 (pp) AKH86621_1	100.0
3690	RZU94771_2 (pp) WP_078572841_2	32.0	100.0	1	pp	RZU94771_2 (pp) WP_078572841_2	100.0
3691	RZU94771_2 (pp) PJJ39560_2	32.0	98.0	1	pp	RZU94771_2 (pp) PJJ39560_2	98.0
3692	RZU94771_2 (pp) WP_100302786_2	32.0	98.0	1	pp	RZU94771_2 (pp) WP_100302786_2	98.0
3693	RZU94771_2 (pp) WP_052770273_1	28.0	88.0	1	pp	RZU94771_2 (pp) WP_052770273_1	88.0
3694	RZU94771_2 (pp) AKH86621_1	28.0	88.0	1	pp	RZU94771_2 (pp) AKH86621_1	88.0
3695	ACZ89043_1 (pp) WP_086572205_1	80.0	99.083	1	pp	ACZ89043_1 (pp) WP_086572205_1	99.08
3696	ACZ89043_1 (pp) KLO64220_1	34.0	50.962	1	pp	ACZ89043_1 (pp) KLO64220_1	48.62
3697	ACZ89043_1 (pp) WP_093886633_1	80.0	99.083	1	pp	ACZ89043_1 (pp) WP_093886633_1	99.08
3698	ACZ89043_1 (pp) SFI84698_1	80.0	99.083	1	pp	ACZ89043_1 (pp) SFI84698_1	99.08
3699	ACZ89043_1 (pp) WP_081453250_1	80.0	100.0	1	pp	ACZ89043_1 (pp) WP_081453250_1	100.0
3700	ACZ89043_1 (pp) WP_081937495_1	80.0	99.083	1	pp	ACZ89043_1 (pp) WP_081937495_1	99.08
3701	WP_086572205_1 (pp) KLO64220_1	34.0	50.962	1	pp	WP_086572205_1 (pp) KLO64220_1	48.62
3702	WP_086572205_1 (pp) WP_093886633_1	80.0	100.0	1	pp	WP_086572205_1 (pp) WP_093886633_1	100.0
3703	WP_086572205_1 (pp) SFI84698_1	80.0	100.0	1	pp	WP_086572205_1 (pp) SFI84698_1	100.0
3704	WP_086572205_1 (pp) WP_081937495_1	80.0	100.0	1	pp	WP_086572205_1 (pp) WP_081937495_1	100.0
3705	WP_086572205_1 (pp) WP_081453250_1	80.0	99.083	1	pp	WP_086572205_1 (pp) WP_081453250_1	99.08
3706	KLO64220_1 (pp) WP_093886633_1	34.0	50.962	1	pp	KLO64220_1 (pp) WP_093886633_1	48.62
3707	KLO64220_1 (pp) SFI84698_1	34.0	50.962	1	pp	KLO64220_1 (pp) SFI84698_1	48.62
3708	KLO64220_1 (pp) WP_081453250_1	34.0	50.962	1	pp	KLO64220_1 (pp) WP_081453250_1	48.62
3709	KLO64220_1 (pp) WP_081937495_1	34.0	50.962	1	pp	KLO64220_1 (pp) WP_081937495_1	48.62
3710	WP_081937495_1 (pp) WP_093886633_1	80.0	100.0	1	pp	WP_081937495_1 (pp) WP_093886633_1	100.0
3711	WP_081937495_1 (pp) SFI84698_1	80.0	100.0	1	pp	WP_081937495_1 (pp) SFI84698_1	100.0
3712	WP_081937495_1 (pp) WP_081453250_1	80.0	99.083	1	pp	WP_081937495_1 (pp) WP_081453250_1	99.08
3713	WP_081453250_1 (pp) SFI84698_1	80.0	99.083	1	pp	WP_081453250_1 (pp) SFI84698_1	99.08
3714	WP_093886633_1 (pp) SFI84698_1	80.0	100.0	1	pp	WP_093886633_1 (pp) SFI84698_1	100.0
3715	WP_093886633_1 (pp) WP_081453250_1	80.0	99.083	1	pp	WP_093886633_1 (pp) WP_081453250_1	99.08
3716	OMO45941_3 (pp) PKB45316_2	20.0	55.932	1	pp	OMO45941_3 (pp) PKB45316_2	50.77
3717	OMO45941_3 (pp) WP_088246551_2	44.0	98.462	1	pp	OMO45941_3 (pp) WP_088246551_2	98.46
3718	OMO45941_3 (pp) WP_053587900_2	14.0	61.364	1	pp	OMO45941_3 (pp) WP_053587900_2	41.54
3719	OMO45941_3 (pp) WP_088261769_1	44.0	100.0	1	pp	OMO45941_3 (pp) WP_088261769_1	100.0
3720	OMO45941_3 (pp) WP_100886407_2	20.0	55.932	1	pp	OMO45941_3 (pp) WP_100886407_2	50.77
3721	OMO45941_3 (pp) WP_088264775_2	44.0	100.0	1	pp	OMO45941_3 (pp) WP_088264775_2	100.0
3722	WP_088264775_2 (pp) PKB45316_2	20.0	55.932	1	pp	WP_088264775_2 (pp) PKB45316_2	50.77
3723	WP_088264775_2 (pp) WP_088246551_2	44.0	98.462	1	pp	WP_088264775_2 (pp) WP_088246551_2	98.46
3724	WP_088264775_2 (pp) WP_053587900_2	14.0	61.364	1	pp	WP_088264775_2 (pp) WP_053587900_2	41.54
3725	WP_088264775_2 (pp) WP_088261769_1	44.0	100.0	1	pp	WP_088264775_2 (pp) WP_088261769_1	100.0
3726	WP_088264775_2 (pp) WP_100886407_2	20.0	55.932	1	pp	WP_088264775_2 (pp) WP_100886407_2	50.77
3727	PKB45316_2 (pp) WP_053587900_2	21.0	64.912	1	pp	PKB45316_2 (pp) WP_053587900_2	50.68
3728	PKB45316_2 (pp) WP_088261769_1	20.0	55.932	1	pp	PKB45316_2 (pp) WP_088261769_1	50.77
3729	PKB45316_2 (pp) WP_100886407_2	51.0	100.0	1	pp	PKB45316_2 (pp) WP_100886407_2	100.0
3730	WP_053587900_2 (pp) WP_088261769_1	14.0	61.364	1	pp	WP_053587900_2 (pp) WP_088261769_1	41.54
3731	WP_053587900_2 (pp) WP_100886407_2	21.0	64.912	1	pp	WP_053587900_2 (pp) WP_100886407_2	50.68
3732	WP_088261769_1 (pp) WP_100886407_2	20.0	55.932	1	pp	WP_088261769_1 (pp) WP_100886407_2	50.77
3733	WP_088246551_2 (pp) PKB45316_2	19.0	54.237	1	pp	WP_088246551_2 (pp) PKB45316_2	49.23
3734	WP_088246551_2 (pp) WP_053587900_2	14.0	61.364	1	pp	WP_088246551_2 (pp) WP_053587900_2	41.54
3735	WP_088246551_2 (pp) WP_088261769_1	44.0	98.462	1	pp	WP_088246551_2 (pp) WP_088261769_1	98.46
3736	WP_088246551_2 (pp) WP_100886407_2	19.0	54.237	1	pp	WP_088246551_2 (pp) WP_100886407_2	49.23
3737	WP_053729790_2 (pp) AKJ15899_3	0.088	40.909	1	pp	WP_053729790_2 (pp) AKJ15899_3	43.9
3738	WP_053729790_2 (pp) WP_053729792_2	26.0	100.0	1	pp	WP_053729790_2 (pp) WP_053729792_2	100.0
3739	WP_100584684_1 (pp) AKJ15899_3	13.0	56.098	1	pp	WP_100584684_1 (pp) AKJ15899_3	56.1
3740	WP_100584684_1 (pp) RPF24868_2	12.0	53.659	1	pp	WP_100584684_1 (pp) RPF24868_2	53.66
3741	WP_100584684_1 (pp) WP_123971014_2	12.0	53.659	1	pp	WP_100584684_1 (pp) WP_123971014_2	53.66
3742	RPF24868_2 (pp) PKB45316_1	0.079	43.902	1	pp	RPF24868_2 (pp) PKB45316_1	46.15
3743	RPF24868_2 (pp) WP_100886407_1	0.079	43.902	1	pp	RPF24868_2 (pp) WP_100886407_1	46.15
3744	RPF24868_2 (pp) AKJ15899_3	21.0	87.805	1	pp	RPF24868_2 (pp) AKJ15899_3	87.81
3745	RPF24868_2 (pp) WP_123971014_2	24.0	100.0	1	pp	RPF24868_2 (pp) WP_123971014_2	100.0
3746	WP_100886407_1 (pp) AKJ15899_3	0.1	41.463	1	pp	WP_100886407_1 (pp) AKJ15899_3	43.59
3747	WP_100886407_1 (pp) WP_123971014_2	0.075	43.902	1	pp	WP_100886407_1 (pp) WP_123971014_2	46.15
3748	PKB45316_1 (pp) WP_100886407_1	23.0	100.0	1	pp	PKB45316_1 (pp) WP_100886407_1	100.0
3749	PKB45316_1 (pp) AKJ15899_3	0.1	41.463	1	pp	PKB45316_1 (pp) AKJ15899_3	43.59
3750	PKB45316_1 (pp) WP_123971014_2	0.075	43.902	1	pp	PKB45316_1 (pp) WP_123971014_2	46.15
3751	AKJ15899_3 (pp) WP_053729792_2	0.086	40.909	1	pp	AKJ15899_3 (pp) WP_053729792_2	43.9
3752	WP_123971014_2 (pp) AKJ15899_3	21.0	87.805	1	pp	WP_123971014_2 (pp) AKJ15899_3	87.81
3753	WP_085014622_4 (pp) WP_064110435_5	32.0	62.821	1	pp	WP_085014622_4 (pp) WP_064110435_5	62.82
3754	WP_085014622_4 (pp) WP_093655900_4	35.0	67.949	1	pp	WP_085014622_4 (pp) WP_093655900_4	67.95
3755	WP_085014622_4 (pp) WP_093849541_3	33.0	62.821	1	pp	WP_085014622_4 (pp) WP_093849541_3	62.82
3756	WP_085014622_4 (pp) WP_027743449_3	29.0	64.103	1	pp	WP_085014622_4 (pp) WP_027743449_3	64.1
3757	WP_085014622_4 (pp) WP_090039557_5	32.0	62.821	1	pp	WP_085014622_4 (pp) WP_090039557_5	62.82
3758	WP_085014622_4 (pp) WP_085014620_3	54.0	100.0	1	pp	WP_085014622_4 (pp) WP_085014620_3	100.0
3759	WP_093766414_3 (pp) WP_064110435_5	32.0	61.538	1	pp	WP_093766414_3 (pp) WP_064110435_5	61.54
3760	WP_093766414_3 (pp) WP_085014622_4	32.0	62.821	1	pp	WP_093766414_3 (pp) WP_085014622_4	62.82
3761	WP_093766414_3 (pp) WP_093655900_4	48.0	84.615	1	pp	WP_093766414_3 (pp) WP_093655900_4	84.62
3762	WP_093766414_3 (pp) WP_093849541_3	47.0	83.333	1	pp	WP_093766414_3 (pp) WP_093849541_3	83.33
3763	WP_093766414_3 (pp) WP_027743449_3	39.0	78.205	1	pp	WP_093766414_3 (pp) WP_027743449_3	78.21
3764	WP_093766414_3 (pp) WP_090039557_5	32.0	61.538	1	pp	WP_093766414_3 (pp) WP_090039557_5	61.54
3765	WP_093766414_3 (pp) WP_085014620_3	32.0	62.821	1	pp	WP_093766414_3 (pp) WP_085014620_3	62.82
3766	WP_093655900_4 (pp) WP_064110435_5	34.0	65.385	1	pp	WP_093655900_4 (pp) WP_064110435_5	65.39
3767	WP_093655900_4 (pp) WP_093849541_3	76.0	93.694	1	pp	WP_093655900_4 (pp) WP_093849541_3	93.69
3768	WP_093655900_4 (pp) WP_027743449_3	39.0	79.487	1	pp	WP_093655900_4 (pp) WP_027743449_3	79.49
3769	WP_093655900_4 (pp) WP_090039557_5	34.0	65.385	1	pp	WP_093655900_4 (pp) WP_090039557_5	65.39
3770	WP_093655900_4 (pp) WP_085014620_3	35.0	67.949	1	pp	WP_093655900_4 (pp) WP_085014620_3	67.95
3771	WP_027743449_3 (pp) WP_064110435_5	39.0	70.513	1	pp	WP_027743449_3 (pp) WP_064110435_5	70.51
3772	WP_027743449_3 (pp) WP_093849541_3	44.0	79.487	1	pp	WP_027743449_3 (pp) WP_093849541_3	79.49
3773	WP_027743449_3 (pp) WP_090039557_5	39.0	70.513	1	pp	WP_027743449_3 (pp) WP_090039557_5	70.51
3774	WP_027743449_3 (pp) WP_085014620_3	33.0	64.103	1	pp	WP_027743449_3 (pp) WP_085014620_3	64.1
3775	WP_064110435_5 (pp) WP_090039557_5	56.0	100.0	1	pp	WP_064110435_5 (pp) WP_090039557_5	100.0
3776	WP_064110435_5 (pp) WP_085014620_3	32.0	62.821	1	pp	WP_064110435_5 (pp) WP_085014620_3	62.82
3777	WP_085014620_3 (pp) WP_090039557_5	32.0	62.821	1	pp	WP_085014620_3 (pp) WP_090039557_5	62.82
3778	WP_093849541_3 (pp) WP_064110435_5	34.0	66.667	1	pp	WP_093849541_3 (pp) WP_064110435_5	66.67
3779	WP_093849541_3 (pp) WP_090039557_5	34.0	66.667	1	pp	WP_093849541_3 (pp) WP_090039557_5	66.67
3780	WP_093849541_3 (pp) WP_085014620_3	33.0	62.821	1	pp	WP_093849541_3 (pp) WP_085014620_3	62.82
3781	WP_131785729_1 (pp) WP_004004118_1	38.0	67.327	1	pp	WP_131785729_1 (pp) WP_004004118_1	68.0
3782	WP_131785729_1 (pp) WP_035849420_4	33.0	62.136	1	pp	WP_131785729_1 (pp) WP_035849420_4	64.0
3783	WP_131785729_1 (pp) WP_067284698_1	38.0	66.337	1	pp	WP_131785729_1 (pp) WP_067284698_1	67.0
3784	WP_131785729_1 (pp) WP_035849418_2	33.0	62.136	1	pp	WP_131785729_1 (pp) WP_035849418_2	64.0
3785	WP_131785729_1 (pp) WP_045877303_2	43.0	72.0	1	pp	WP_131785729_1 (pp) WP_045877303_2	72.0
3786	WP_131785729_1 (pp) WP_131785730_1	65.0	100.0	1	pp	WP_131785729_1 (pp) WP_131785730_1	100.0
3787	WP_131785729_1 (pp) WP_084011357_2	43.0	72.0	1	pp	WP_131785729_1 (pp) WP_084011357_2	72.0
3788	WP_004004118_1 (pp) WP_045877303_2	39.0	66.0	1	pp	WP_004004118_1 (pp) WP_045877303_2	66.0
3789	WP_035849420_4 (pp) WP_004004118_1	38.0	65.0	1	pp	WP_035849420_4 (pp) WP_004004118_1	65.0
3790	WP_035849420_4 (pp) WP_035849418_2	65.0	100.0	1	pp	WP_035849420_4 (pp) WP_035849418_2	100.0
3791	WP_035849420_4 (pp) WP_045877303_2	31.0	59.0	1	pp	WP_035849420_4 (pp) WP_045877303_2	59.0
3792	WP_035849420_4 (pp) WP_131785730_1	33.0	62.136	1	pp	WP_035849420_4 (pp) WP_131785730_1	64.0
3793	WP_035849418_2 (pp) WP_004004118_1	38.0	65.0	1	pp	WP_035849418_2 (pp) WP_004004118_1	65.0
3794	WP_035849418_2 (pp) WP_045877303_2	31.0	59.0	1	pp	WP_035849418_2 (pp) WP_045877303_2	59.0
3795	WP_035849418_2 (pp) WP_131785730_1	33.0	62.136	1	pp	WP_035849418_2 (pp) WP_131785730_1	64.0
3796	WP_131785730_1 (pp) WP_004004118_1	38.0	67.327	1	pp	WP_131785730_1 (pp) WP_004004118_1	68.0
3797	WP_131785730_1 (pp) WP_045877303_2	43.0	72.0	1	pp	WP_131785730_1 (pp) WP_045877303_2	72.0
3798	WP_084011357_2 (pp) WP_004004118_1	39.0	66.0	1	pp	WP_084011357_2 (pp) WP_004004118_1	66.0
3799	WP_084011357_2 (pp) WP_035849420_4	31.0	59.0	1	pp	WP_084011357_2 (pp) WP_035849420_4	59.0
3800	WP_084011357_2 (pp) WP_035849418_2	31.0	59.0	1	pp	WP_084011357_2 (pp) WP_035849418_2	59.0
3801	WP_084011357_2 (pp) WP_045877303_2	65.0	100.0	1	pp	WP_084011357_2 (pp) WP_045877303_2	100.0
3802	WP_084011357_2 (pp) WP_131785730_1	43.0	72.0	1	pp	WP_084011357_2 (pp) WP_131785730_1	72.0
3803	WP_067284698_1 (pp) WP_004004118_1	52.0	83.0	1	pp	WP_067284698_1 (pp) WP_004004118_1	83.0
3804	WP_067284698_1 (pp) WP_035849420_4	38.0	66.0	1	pp	WP_067284698_1 (pp) WP_035849420_4	66.0
3805	WP_067284698_1 (pp) WP_035849418_2	38.0	66.0	1	pp	WP_067284698_1 (pp) WP_035849418_2	66.0
3806	WP_067284698_1 (pp) WP_045877303_2	37.0	63.0	1	pp	WP_067284698_1 (pp) WP_045877303_2	63.0
3807	WP_067284698_1 (pp) WP_131785730_1	38.0	66.337	1	pp	WP_067284698_1 (pp) WP_131785730_1	67.0
3808	WP_067284698_1 (pp) WP_084011357_2	37.0	63.0	1	pp	WP_067284698_1 (pp) WP_084011357_2	63.0
3809	WP_061787443_2 (pp) SEC29390_1	19.0	43.0	1	pp	WP_061787443_2 (pp) SEC29390_1	41.35
3810	WP_061787443_2 (pp) WP_066215709_1	19.0	43.0	1	pp	WP_061787443_2 (pp) WP_066215709_1	41.35
3811	WP_089950617_1 (pp) SEC29390_1	33.0	55.435	1	pp	WP_089950617_1 (pp) SEC29390_1	49.04
3812	WP_089950617_1 (pp) WP_052852666_1	31.0	52.174	1	pp	WP_089950617_1 (pp) WP_052852666_1	43.24
3813	WP_089950617_1 (pp) WP_066215709_1	33.0	55.435	1	pp	WP_089950617_1 (pp) WP_066215709_1	49.04
3814	WP_089950617_1 (pp) SEQ53933_1	79.0	100.0	1	pp	WP_089950617_1 (pp) SEQ53933_1	100.0
3815	WP_066215709_1 (pp) SEC29390_1	74.0	100.0	1	pp	WP_066215709_1 (pp) SEC29390_1	100.0
3816	WP_066215709_1 (pp) WP_052852666_1	49.0	71.845	1	pp	WP_066215709_1 (pp) WP_052852666_1	71.15
3817	WP_066215709_1 (pp) WP_109280200_1	25.0	45.631	1	pp	WP_066215709_1 (pp) WP_109280200_1	45.19
3818	WP_066215709_1 (pp) SEQ53933_1	33.0	55.435	1	pp	WP_066215709_1 (pp) SEQ53933_1	49.04
3819	WP_109280137_1 (pp) SEC29390_1	25.0	45.631	1	pp	WP_109280137_1 (pp) SEC29390_1	45.19
3820	WP_109280137_1 (pp) WP_052852666_1	25.0	49.462	1	pp	WP_109280137_1 (pp) WP_052852666_1	42.2
3821	WP_109280137_1 (pp) WP_109280200_1	77.0	100.0	1	pp	WP_109280137_1 (pp) WP_109280200_1	100.0
3822	WP_109280137_1 (pp) WP_066215709_1	25.0	45.631	1	pp	WP_109280137_1 (pp) WP_066215709_1	45.19
3823	WP_052852666_1 (pp) SEQ53933_1	31.0	52.174	1	pp	WP_052852666_1 (pp) SEQ53933_1	43.24
3824	WP_109280200_1 (pp) WP_052852666_1	25.0	49.462	1	pp	WP_109280200_1 (pp) WP_052852666_1	42.2
3825	SEC29390_1 (pp) WP_052852666_1	49.0	71.845	1	pp	SEC29390_1 (pp) WP_052852666_1	71.15
3826	SEC29390_1 (pp) WP_109280200_1	25.0	45.631	1	pp	SEC29390_1 (pp) WP_109280200_1	45.19
3827	SEC29390_1 (pp) SEQ53933_1	33.0	55.435	1	pp	SEC29390_1 (pp) SEQ53933_1	49.04
3828	BAG17422_1 (pp) WP_052295615_1	51.0	100.0	1	pp	BAG17422_1 (pp) WP_052295615_1	100.0
3829	BAG17422_1 (pp) KOU46944_3	45.0	90.789	1	pp	BAG17422_1 (pp) KOU46944_3	90.79
3830	BAG17422_1 (pp) WP_083191919_3	45.0	90.789	1	pp	BAG17422_1 (pp) WP_083191919_3	90.79
3831	WP_055559179_2 (pp) WP_052295615_1	27.0	67.949	1	pp	WP_055559179_2 (pp) WP_052295615_1	77.94
3832	WP_055559179_2 (pp) BAG17422_1	27.0	67.949	1	pp	WP_055559179_2 (pp) BAG17422_1	77.94
3833	WP_055559179_2 (pp) KOU46944_3	32.0	75.641	1	pp	WP_055559179_2 (pp) KOU46944_3	86.76
3834	WP_055559179_2 (pp) WP_083191919_3	32.0	75.641	1	pp	WP_055559179_2 (pp) WP_083191919_3	86.76
3835	WP_106731546_1 (pp) WP_052295615_1	50.0	98.684	1	pp	WP_106731546_1 (pp) WP_052295615_1	98.68
3836	WP_106731546_1 (pp) BAG17422_1	50.0	98.684	1	pp	WP_106731546_1 (pp) BAG17422_1	98.68
3837	WP_106731546_1 (pp) KOU46944_3	46.0	92.105	1	pp	WP_106731546_1 (pp) KOU46944_3	92.11
3838	WP_106731546_1 (pp) WP_083191919_3	46.0	92.105	1	pp	WP_106731546_1 (pp) WP_083191919_3	92.11
3839	WP_106731546_1 (pp) WP_055559179_2	28.0	69.231	1	pp	WP_106731546_1 (pp) WP_055559179_2	79.41
3840	WP_106731546_1 (pp) KOG82578_4	46.0	92.105	1	pp	WP_106731546_1 (pp) KOG82578_4	92.11
3841	KOG82578_4 (pp) WP_052295615_1	45.0	90.789	1	pp	KOG82578_4 (pp) WP_052295615_1	90.79
3842	KOG82578_4 (pp) BAG17422_1	45.0	90.789	1	pp	KOG82578_4 (pp) BAG17422_1	90.79
3843	KOG82578_4 (pp) KOU46944_3	50.0	100.0	1	pp	KOG82578_4 (pp) KOU46944_3	100.0
3844	KOG82578_4 (pp) WP_083191919_3	50.0	100.0	1	pp	KOG82578_4 (pp) WP_083191919_3	100.0
3845	KOG82578_4 (pp) WP_055559179_2	32.0	75.641	1	pp	KOG82578_4 (pp) WP_055559179_2	86.76
3846	SDE31545_2 (pp) WP_052295615_1	45.0	90.789	1	pp	SDE31545_2 (pp) WP_052295615_1	90.79
3847	SDE31545_2 (pp) BAG17422_1	45.0	90.789	1	pp	SDE31545_2 (pp) BAG17422_1	90.79
3848	SDE31545_2 (pp) KOU46944_3	50.0	100.0	1	pp	SDE31545_2 (pp) KOU46944_3	100.0
3849	SDE31545_2 (pp) WP_083191919_3	50.0	100.0	1	pp	SDE31545_2 (pp) WP_083191919_3	100.0
3850	SDE31545_2 (pp) WP_055559179_2	32.0	75.641	1	pp	SDE31545_2 (pp) WP_055559179_2	86.76
3851	SDE31545_2 (pp) WP_106731546_1	46.0	92.105	1	pp	SDE31545_2 (pp) WP_106731546_1	92.11
3852	SDE31545_2 (pp) KOG82578_4	50.0	100.0	1	pp	SDE31545_2 (pp) KOG82578_4	100.0
3853	KOU46944_3 (pp) WP_083191919_3	50.0	100.0	1	pp	KOU46944_3 (pp) WP_083191919_3	100.0
3854	WP_052295615_1 (pp) KOU46944_3	45.0	90.789	1	pp	WP_052295615_1 (pp) KOU46944_3	90.79
3855	WP_052295615_1 (pp) WP_083191919_3	45.0	90.789	1	pp	WP_052295615_1 (pp) WP_083191919_3	90.79
3856	WP_090047429_4 (pp) WP_109636347_1	11.0	90.909	1	pp	WP_090047429_4 (pp) WP_109636347_1	87.72
3857	WP_090047429_4 (pp) SMC91639_2	14.0	89.286	1	pp	WP_090047429_4 (pp) SMC91639_2	87.72
3858	WP_090047429_4 (pp) WP_090064781_1	14.0	90.385	1	pp	WP_090047429_4 (pp) WP_090064781_1	82.46
3859	WP_090047429_4 (pp) WP_093590338_1	14.0	90.385	1	pp	WP_090047429_4 (pp) WP_093590338_1	82.46
3860	WP_090047429_4 (pp) SER15522_2	14.0	94.545	1	pp	WP_090047429_4 (pp) SER15522_2	91.23
3861	WP_090047429_4 (pp) WP_090003614_1	14.0	90.385	1	pp	WP_090047429_4 (pp) WP_090003614_1	82.46
3862	WP_089952439_2 (pp) WP_109636347_1	13.0	89.831	1	pp	WP_089952439_2 (pp) WP_109636347_1	89.83
3863	WP_089952439_2 (pp) SMC91639_2	14.0	84.746	1	pp	WP_089952439_2 (pp) SMC91639_2	84.75
3864	WP_089952439_2 (pp) WP_090047429_4	23.0	94.545	1	pp	WP_089952439_2 (pp) WP_090047429_4	91.23
3865	WP_089952439_2 (pp) WP_090064781_1	13.0	88.462	1	pp	WP_089952439_2 (pp) WP_090064781_1	80.7
3866	WP_089952439_2 (pp) WP_093590338_1	13.0	88.462	1	pp	WP_089952439_2 (pp) WP_093590338_1	80.7
3867	WP_089952439_2 (pp) SER15522_2	38.0	100.0	1	pp	WP_089952439_2 (pp) SER15522_2	100.0
3868	WP_089952439_2 (pp) WP_090003614_1	13.0	83.929	1	pp	WP_089952439_2 (pp) WP_090003614_1	82.46
3869	SER15522_2 (pp) WP_109636347_1	13.0	89.831	1	pp	SER15522_2 (pp) WP_109636347_1	89.83
3870	SER15522_2 (pp) SMC91639_2	14.0	84.746	1	pp	SER15522_2 (pp) SMC91639_2	84.75
3871	SER15522_2 (pp) WP_090064781_1	13.0	88.462	1	pp	SER15522_2 (pp) WP_090064781_1	80.7
3872	SER15522_2 (pp) WP_093590338_1	13.0	88.462	1	pp	SER15522_2 (pp) WP_093590338_1	80.7
3873	SER15522_2 (pp) WP_090003614_1	13.0	83.929	1	pp	SER15522_2 (pp) WP_090003614_1	82.46
3874	WP_109636347_1 (pp) SMC91639_2	15.0	85.0	1	pp	WP_109636347_1 (pp) SMC91639_2	86.44
3875	WP_109636347_1 (pp) WP_090064781_1	13.0	88.462	1	pp	WP_109636347_1 (pp) WP_090064781_1	80.7
3876	WP_109636347_1 (pp) WP_093590338_1	13.0	88.462	1	pp	WP_109636347_1 (pp) WP_093590338_1	80.7
3877	WP_109636347_1 (pp) WP_090003614_1	13.0	83.051	1	pp	WP_109636347_1 (pp) WP_090003614_1	85.97
3878	PWK88358_1 (pp) SMC91639_2	15.0	85.0	1	pp	PWK88358_1 (pp) SMC91639_2	86.44
3879	PWK88358_1 (pp) WP_090047429_4	23.0	90.909	1	pp	PWK88358_1 (pp) WP_090047429_4	87.72
3880	PWK88358_1 (pp) WP_089952439_2	16.0	89.831	1	pp	PWK88358_1 (pp) WP_089952439_2	89.83
3881	PWK88358_1 (pp) WP_090064781_1	13.0	88.462	1	pp	PWK88358_1 (pp) WP_090064781_1	80.7
3882	PWK88358_1 (pp) WP_093590338_1	13.0	88.462	1	pp	PWK88358_1 (pp) WP_093590338_1	80.7
3883	PWK88358_1 (pp) SER15522_2	16.0	89.831	1	pp	PWK88358_1 (pp) SER15522_2	89.83
3884	PWK88358_1 (pp) WP_109636347_1	38.0	100.0	1	pp	PWK88358_1 (pp) WP_109636347_1	100.0
3885	PWK88358_1 (pp) WP_090003614_1	13.0	83.051	1	pp	PWK88358_1 (pp) WP_090003614_1	85.97
3886	SMC91639_2 (pp) WP_090064781_1	33.0	93.333	1	pp	SMC91639_2 (pp) WP_090064781_1	98.25
3887	WP_093590338_1 (pp) SMC91639_2	33.0	93.333	1	pp	WP_093590338_1 (pp) SMC91639_2	98.25
3888	WP_093590338_1 (pp) WP_090064781_1	36.0	100.0	1	pp	WP_093590338_1 (pp) WP_090064781_1	100.0
3889	WP_090003614_1 (pp) SMC91639_2	33.0	100.0	1	pp	WP_090003614_1 (pp) SMC91639_2	92.98
3890	WP_090003614_1 (pp) WP_090064781_1	35.0	98.246	1	pp	WP_090003614_1 (pp) WP_090064781_1	98.25
3891	WP_090003614_1 (pp) WP_093590338_1	35.0	98.246	1	pp	WP_090003614_1 (pp) WP_093590338_1	98.25
3892	WP_073785992_4 (pp) KOV37396_2	12.0	75.862	1	pp	WP_073785992_4 (pp) KOV37396_2	52.38
3893	WP_073785992_4 (pp) WP_051771079_1	15.0	64.286	1	pp	WP_073785992_4 (pp) WP_051771079_1	62.79
3894	WP_073785992_4 (pp) KJY27974_1	12.0	75.862	1	pp	WP_073785992_4 (pp) KJY27974_1	52.38
3895	WP_073785992_4 (pp) WP_078902009_1	16.0	74.419	1	pp	WP_073785992_4 (pp) WP_078902009_1	78.05
3896	WP_073785992_4 (pp) OKH95170_4	28.0	100.0	1	pp	WP_073785992_4 (pp) OKH95170_4	100.0
3897	WP_073785992_4 (pp) EIF94124_2	16.0	74.419	1	pp	WP_073785992_4 (pp) EIF94124_2	78.05
3898	WP_121006702_1 (pp) WP_078902009_1	0.032	48.485	1	pp	WP_121006702_1 (pp) WP_078902009_1	42.11
3899	EIF94124_2 (pp) KOV37396_2	13.0	63.415	1	pp	EIF94124_2 (pp) KOV37396_2	63.41
3900	EIF94124_2 (pp) WP_051771079_1	14.0	62.791	1	pp	EIF94124_2 (pp) WP_051771079_1	65.85
3901	EIF94124_2 (pp) KJY27974_1	13.0	63.415	1	pp	EIF94124_2 (pp) KJY27974_1	63.41
3902	EIF94124_2 (pp) WP_062703680_1	0.32	43.75	1	pp	EIF94124_2 (pp) WP_062703680_1	41.18
3903	EIF94124_2 (pp) WP_078902009_1	26.0	100.0	1	pp	EIF94124_2 (pp) WP_078902009_1	100.0
3904	EIF94124_2 (pp) OKH95170_4	16.0	74.419	1	pp	EIF94124_2 (pp) OKH95170_4	78.05
3905	EIF94124_2 (pp) WP_121006702_1	0.035	48.485	1	pp	EIF94124_2 (pp) WP_121006702_1	42.11
3906	KJY27974_1 (pp) KOV37396_2	26.0	100.0	1	pp	KJY27974_1 (pp) KOV37396_2	100.0
3907	KJY27974_1 (pp) WP_051771079_1	16.0	76.19	1	pp	KJY27974_1 (pp) WP_051771079_1	76.19
3908	KJY27974_1 (pp) WP_078902009_1	13.0	63.415	1	pp	KJY27974_1 (pp) WP_078902009_1	63.41
3909	KJY27974_1 (pp) OKH95170_4	12.0	75.862	1	pp	KJY27974_1 (pp) OKH95170_4	52.38
3910	KOV37396_2 (pp) WP_078902009_1	13.0	63.415	1	pp	KOV37396_2 (pp) WP_078902009_1	63.41
3911	OKH95170_4 (pp) KOV37396_2	12.0	75.862	1	pp	OKH95170_4 (pp) KOV37396_2	52.38
3912	OKH95170_4 (pp) WP_078902009_1	16.0	74.419	1	pp	OKH95170_4 (pp) WP_078902009_1	78.05
3913	WP_051771079_1 (pp) KOV37396_2	16.0	76.19	1	pp	WP_051771079_1 (pp) KOV37396_2	76.19
3914	WP_051771079_1 (pp) WP_078902009_1	14.0	62.791	1	pp	WP_051771079_1 (pp) WP_078902009_1	65.85
3915	WP_051771079_1 (pp) OKH95170_4	15.0	64.286	1	pp	WP_051771079_1 (pp) OKH95170_4	62.79
3916	WP_062703680_1 (pp) WP_078902009_1	0.26	43.75	1	pp	WP_062703680_1 (pp) WP_078902009_1	41.18
3917	WP_030462613_2 (pp) WP_088799362_3	7.0	59.375	1	pp	WP_030462613_2 (pp) WP_088799362_3	50.0
3918	WP_030462613_2 (pp) WP_037881970_3	7.0	66.667	1	pp	WP_030462613_2 (pp) WP_037881970_3	47.37
3919	WP_030462613_2 (pp) WP_030040480_4	8.0	65.517	1	pp	WP_030462613_2 (pp) WP_030040480_4	50.0
3920	WP_030462613_2 (pp) WP_067603246_1	19.0	77.778	1	pp	WP_030462613_2 (pp) WP_067603246_1	79.55
3921	WP_030462613_2 (pp) WP_053747924_3	8.0	65.517	1	pp	WP_030462613_2 (pp) WP_053747924_3	50.0
3922	WP_030462613_2 (pp) WP_111415595_4	7.0	62.069	1	pp	WP_030462613_2 (pp) WP_111415595_4	47.37
3923	WP_037881970_3 (pp) WP_088799362_3	17.0	76.316	1	pp	WP_037881970_3 (pp) WP_088799362_3	76.32
3924	WP_037881970_3 (pp) WP_030040480_4	20.0	92.105	1	pp	WP_037881970_3 (pp) WP_030040480_4	92.11
3925	WP_037881970_3 (pp) WP_067603246_1	8.0	66.667	1	pp	WP_037881970_3 (pp) WP_067603246_1	47.37
3926	WP_037881970_3 (pp) WP_053747924_3	20.0	92.105	1	pp	WP_037881970_3 (pp) WP_053747924_3	92.11
3927	WP_037881970_3 (pp) WP_111415595_4	16.0	81.579	1	pp	WP_037881970_3 (pp) WP_111415595_4	81.58
3928	WP_088799351_2 (pp) WP_088799362_4	31.0	100.0	1	pp	WP_088799351_2 (pp) WP_088799362_4	100.0
3929	WP_088799351_2 (pp) WP_067603246_1	6.0	48.649	1	pp	WP_088799351_2 (pp) WP_067603246_1	40.91
3930	WP_088799362_4 (pp) WP_067603246_1	6.0	48.649	1	pp	WP_088799362_4 (pp) WP_067603246_1	40.91
3931	WP_088799362_3 (pp) WP_067603246_1	8.0	59.375	1	pp	WP_088799362_3 (pp) WP_067603246_1	50.0
3932	WP_088799362_3 (pp) WP_053747924_3	19.0	84.211	1	pp	WP_088799362_3 (pp) WP_053747924_3	84.21
3933	WP_088799362_3 (pp) WP_111415595_4	16.0	73.684	1	pp	WP_088799362_3 (pp) WP_111415595_4	73.68
3934	WP_067603246_1 (pp) WP_111415595_4	7.0	62.069	1	pp	WP_067603246_1 (pp) WP_111415595_4	47.37
3935	WP_053747924_3 (pp) WP_067603246_1	8.0	65.517	1	pp	WP_053747924_3 (pp) WP_067603246_1	50.0
3936	WP_053747924_3 (pp) WP_111415595_4	19.0	89.474	1	pp	WP_053747924_3 (pp) WP_111415595_4	89.47
3937	WP_030040480_4 (pp) WP_088799362_3	19.0	84.211	1	pp	WP_030040480_4 (pp) WP_088799362_3	84.21
3938	WP_030040480_4 (pp) WP_067603246_1	8.0	65.517	1	pp	WP_030040480_4 (pp) WP_067603246_1	50.0
3939	WP_030040480_4 (pp) WP_053747924_3	22.0	100.0	1	pp	WP_030040480_4 (pp) WP_053747924_3	100.0
3940	WP_030040480_4 (pp) WP_111415595_4	19.0	89.474	1	pp	WP_030040480_4 (pp) WP_111415595_4	89.47
3941	WP_063471945_1 (pp) WP_122530149_1	63.0	98.969	1	pp	WP_063471945_1 (pp) WP_122530149_1	98.97
3942	WP_063471945_1 (pp) EUA05503_1	63.0	97.938	1	pp	WP_063471945_1 (pp) EUA05503_1	97.94
3943	WP_063471945_1 (pp) WP_085105271_1	63.0	97.938	1	pp	WP_063471945_1 (pp) WP_085105271_1	97.94
3944	WP_063471945_1 (pp) WP_083102943_1	63.0	97.938	1	pp	WP_063471945_1 (pp) WP_083102943_1	97.94
3945	WP_063471945_1 (pp) WP_085252934_1	51.0	83.505	1	pp	WP_063471945_1 (pp) WP_085252934_1	83.5
3946	WP_063471945_1 (pp) WP_083115648_1	52.0	82.474	1	pp	WP_063471945_1 (pp) WP_083115648_1	82.47
3947	WP_063471945_1 (pp) WP_085671318_1	51.0	81.443	1	pp	WP_063471945_1 (pp) WP_085671318_1	81.44
3948	WP_063471945_1 (pp) OOK83994_1	63.0	97.938	1	pp	WP_063471945_1 (pp) OOK83994_1	97.94
3949	WP_085252934_1 (pp) WP_122530149_1	50.0	82.474	1	pp	WP_085252934_1 (pp) WP_122530149_1	82.47
3950	WP_085252934_1 (pp) EUA05503_1	51.0	83.505	1	pp	WP_085252934_1 (pp) EUA05503_1	83.5
3951	WP_085252934_1 (pp) WP_085105271_1	51.0	83.505	1	pp	WP_085252934_1 (pp) WP_085105271_1	83.5
3952	WP_085252934_1 (pp) WP_083102943_1	51.0	83.505	1	pp	WP_085252934_1 (pp) WP_083102943_1	83.5
3953	WP_085252934_1 (pp) WP_083115648_1	58.0	92.784	1	pp	WP_085252934_1 (pp) WP_083115648_1	92.78
3954	WP_085252934_1 (pp) WP_085671318_1	57.0	91.753	1	pp	WP_085252934_1 (pp) WP_085671318_1	91.75
3955	WP_085252934_1 (pp) OOK83994_1	51.0	83.505	1	pp	WP_085252934_1 (pp) OOK83994_1	83.5
3956	EUA05503_1 (pp) WP_122530149_1	62.0	96.907	1	pp	EUA05503_1 (pp) WP_122530149_1	96.91
3957	EUA05503_1 (pp) WP_083102943_1	64.0	100.0	1	pp	EUA05503_1 (pp) WP_083102943_1	100.0
3958	EUA05503_1 (pp) WP_083115648_1	52.0	83.505	1	pp	EUA05503_1 (pp) WP_083115648_1	83.5
3959	EUA05503_1 (pp) OOK83994_1	64.0	100.0	1	pp	EUA05503_1 (pp) OOK83994_1	100.0
3960	WP_085105271_1 (pp) WP_122530149_1	62.0	96.907	1	pp	WP_085105271_1 (pp) WP_122530149_1	96.91
3961	WP_085105271_1 (pp) EUA05503_1	61.0	95.876	1	pp	WP_085105271_1 (pp) EUA05503_1	95.88
3962	WP_085105271_1 (pp) WP_083102943_1	61.0	95.876	1	pp	WP_085105271_1 (pp) WP_083102943_1	95.88
3963	WP_085105271_1 (pp) WP_083115648_1	52.0	82.474	1	pp	WP_085105271_1 (pp) WP_083115648_1	82.47
3964	WP_085105271_1 (pp) OOK83994_1	61.0	95.876	1	pp	WP_085105271_1 (pp) OOK83994_1	95.88
3965	WP_085671318_1 (pp) WP_122530149_1	50.0	80.412	1	pp	WP_085671318_1 (pp) WP_122530149_1	80.41
3966	WP_085671318_1 (pp) EUA05503_1	51.0	81.443	1	pp	WP_085671318_1 (pp) EUA05503_1	81.44
3967	WP_085671318_1 (pp) WP_085105271_1	51.0	81.443	1	pp	WP_085671318_1 (pp) WP_085105271_1	81.44
3968	WP_085671318_1 (pp) WP_083102943_1	51.0	81.443	1	pp	WP_085671318_1 (pp) WP_083102943_1	81.44
3969	WP_085671318_1 (pp) WP_083115648_1	61.0	96.907	1	pp	WP_085671318_1 (pp) WP_083115648_1	96.91
3970	WP_085671318_1 (pp) OOK83994_1	51.0	81.443	1	pp	WP_085671318_1 (pp) OOK83994_1	81.44
3971	WP_122530149_1 (pp) WP_083102943_1	62.0	96.907	1	pp	WP_122530149_1 (pp) WP_083102943_1	96.91
3972	OOK83994_1 (pp) WP_122530149_1	62.0	96.907	1	pp	OOK83994_1 (pp) WP_122530149_1	96.91
3973	OOK83994_1 (pp) WP_083102943_1	64.0	100.0	1	pp	OOK83994_1 (pp) WP_083102943_1	100.0
3974	WP_083115648_1 (pp) WP_122530149_1	51.0	81.443	1	pp	WP_083115648_1 (pp) WP_122530149_1	81.44
3975	WP_083115648_1 (pp) WP_083102943_1	52.0	83.505	1	pp	WP_083115648_1 (pp) WP_083102943_1	83.5
3976	WP_083115648_1 (pp) OOK83994_1	52.0	83.505	1	pp	WP_083115648_1 (pp) OOK83994_1	83.5
3977	WP_085014622_2 (pp) WP_064110435_4	25.0	73.077	1	pp	WP_085014622_2 (pp) WP_064110435_4	70.37
3978	WP_085014622_2 (pp) WP_093849541_6	26.0	77.778	1	pp	WP_085014622_2 (pp) WP_093849541_6	77.78
3979	WP_085014622_2 (pp) WP_093766414_5	27.0	81.481	1	pp	WP_085014622_2 (pp) WP_093766414_5	81.48
3980	WP_085014622_2 (pp) WP_085014620_2	36.0	100.0	1	pp	WP_085014622_2 (pp) WP_085014620_2	100.0
3981	WP_085014622_2 (pp) WP_090039557_4	25.0	73.077	1	pp	WP_085014622_2 (pp) WP_090039557_4	70.37
3982	WP_085014622_2 (pp) WP_027743449_5	27.0	75.926	1	pp	WP_085014622_2 (pp) WP_027743449_5	75.93
3983	WP_085014622_2 (pp) WP_093655900_6	26.0	77.778	1	pp	WP_085014622_2 (pp) WP_093655900_6	77.78
3984	WP_085014622_2 (pp) WP_035849420_3	27.0	77.778	1	pp	WP_085014622_2 (pp) WP_035849420_3	77.78
3985	WP_085014620_2 (pp) WP_064110435_4	25.0	73.077	1	pp	WP_085014620_2 (pp) WP_064110435_4	70.37
3986	WP_085014620_2 (pp) WP_093849541_6	26.0	77.778	1	pp	WP_085014620_2 (pp) WP_093849541_6	77.78
3987	WP_085014620_2 (pp) WP_090039557_4	25.0	73.077	1	pp	WP_085014620_2 (pp) WP_090039557_4	70.37
3988	WP_085014620_2 (pp) WP_035849420_3	27.0	77.778	1	pp	WP_085014620_2 (pp) WP_035849420_3	77.78
3989	WP_027743449_5 (pp) WP_064110435_4	27.0	73.077	1	pp	WP_027743449_5 (pp) WP_064110435_4	69.09
3990	WP_027743449_5 (pp) WP_085014620_2	27.0	75.926	1	pp	WP_027743449_5 (pp) WP_085014620_2	75.93
3991	WP_027743449_5 (pp) WP_093849541_6	29.0	85.185	1	pp	WP_027743449_5 (pp) WP_093849541_6	85.19
3992	WP_027743449_5 (pp) WP_090039557_4	27.0	75.0	1	pp	WP_027743449_5 (pp) WP_090039557_4	70.91
3993	WP_027743449_5 (pp) WP_035849420_3	29.0	81.481	1	pp	WP_027743449_5 (pp) WP_035849420_3	81.48
3994	WP_093655900_6 (pp) WP_085014620_2	26.0	77.778	1	pp	WP_093655900_6 (pp) WP_085014620_2	77.78
3995	WP_093655900_6 (pp) WP_064110435_4	30.0	78.182	1	pp	WP_093655900_6 (pp) WP_064110435_4	79.63
3996	WP_093655900_6 (pp) WP_093849541_6	36.0	100.0	1	pp	WP_093655900_6 (pp) WP_093849541_6	100.0
3997	WP_093655900_6 (pp) WP_027743449_5	29.0	85.185	1	pp	WP_093655900_6 (pp) WP_027743449_5	85.19
3998	WP_093655900_6 (pp) WP_090039557_4	30.0	78.182	1	pp	WP_093655900_6 (pp) WP_090039557_4	79.63
3999	WP_093655900_6 (pp) WP_035849420_3	31.0	81.481	1	pp	WP_093655900_6 (pp) WP_035849420_3	81.48
4000	WP_093766414_5 (pp) WP_085014620_2	27.0	81.481	1	pp	WP_093766414_5 (pp) WP_085014620_2	81.48
4001	WP_093766414_5 (pp) WP_064110435_4	30.0	81.818	1	pp	WP_093766414_5 (pp) WP_064110435_4	83.33
4002	WP_093766414_5 (pp) WP_093849541_6	33.0	88.889	1	pp	WP_093766414_5 (pp) WP_093849541_6	88.89
4003	WP_093766414_5 (pp) WP_027743449_5	29.0	79.63	1	pp	WP_093766414_5 (pp) WP_027743449_5	79.63
4004	WP_093766414_5 (pp) WP_090039557_4	30.0	80.0	1	pp	WP_093766414_5 (pp) WP_090039557_4	81.48
4005	WP_093766414_5 (pp) WP_093655900_6	33.0	88.889	1	pp	WP_093766414_5 (pp) WP_093655900_6	88.89
4006	WP_093766414_5 (pp) WP_035849420_3	32.0	85.185	1	pp	WP_093766414_5 (pp) WP_035849420_3	85.19
4007	WP_064110435_4 (pp) WP_093849541_6	30.0	78.182	1	pp	WP_064110435_4 (pp) WP_093849541_6	79.63
4008	WP_064110435_4 (pp) WP_090039557_4	37.0	98.182	1	pp	WP_064110435_4 (pp) WP_090039557_4	98.18
4009	WP_090039557_4 (pp) WP_093849541_6	30.0	78.182	1	pp	WP_090039557_4 (pp) WP_093849541_6	79.63
4010	WP_035849420_3 (pp) WP_093849541_6	31.0	81.481	1	pp	WP_035849420_3 (pp) WP_093849541_6	81.48
4011	WP_035849420_3 (pp) WP_064110435_4	29.0	78.846	1	pp	WP_035849420_3 (pp) WP_064110435_4	75.93
4012	WP_035849420_3 (pp) WP_090039557_4	29.0	80.769	1	pp	WP_035849420_3 (pp) WP_090039557_4	77.78
4013	WP_090039557_1 (pp) WP_093766414_2	42.0	63.366	1	pp	WP_090039557_1 (pp) WP_093766414_2	63.37
4014	WP_090039557_1 (pp) WP_085014620_5	38.0	58.416	1	pp	WP_090039557_1 (pp) WP_085014620_5	58.42
4015	WP_090039557_1 (pp) WP_064110435_1	69.0	96.04	1	pp	WP_090039557_1 (pp) WP_064110435_1	96.04
4016	WP_090039557_1 (pp) WP_093655900_2	40.0	61.386	1	pp	WP_090039557_1 (pp) WP_093655900_2	61.39
4017	WP_090039557_1 (pp) WP_035849420_2	47.0	69.307	1	pp	WP_090039557_1 (pp) WP_035849420_2	69.31
4018	WP_090039557_1 (pp) WP_027743449_2	41.0	63.366	1	pp	WP_090039557_1 (pp) WP_027743449_2	63.37
4019	WP_090039557_1 (pp) WP_093849541_1	37.0	62.376	1	pp	WP_090039557_1 (pp) WP_093849541_1	62.38
4020	WP_085014620_5 (pp) WP_093766414_2	49.0	73.267	1	pp	WP_085014620_5 (pp) WP_093766414_2	73.27
4021	WP_085014620_5 (pp) WP_064110435_1	37.0	57.426	1	pp	WP_085014620_5 (pp) WP_064110435_1	57.43
4022	WP_085014620_5 (pp) WP_027743449_2	47.0	71.287	1	pp	WP_085014620_5 (pp) WP_027743449_2	71.29
4023	WP_093655900_2 (pp) WP_093766414_2	59.0	83.168	1	pp	WP_093655900_2 (pp) WP_093766414_2	83.17
4024	WP_093655900_2 (pp) WP_085014620_5	48.0	73.267	1	pp	WP_093655900_2 (pp) WP_085014620_5	73.27
4025	WP_093655900_2 (pp) WP_064110435_1	42.0	63.366	1	pp	WP_093655900_2 (pp) WP_064110435_1	63.37
4026	WP_093655900_2 (pp) WP_035849420_2	49.0	75.248	1	pp	WP_093655900_2 (pp) WP_035849420_2	75.25
4027	WP_093655900_2 (pp) WP_027743449_2	49.0	73.267	1	pp	WP_093655900_2 (pp) WP_027743449_2	73.27
4028	WP_093655900_2 (pp) WP_093849541_1	57.0	92.079	1	pp	WP_093655900_2 (pp) WP_093849541_1	92.08
4029	WP_035849420_2 (pp) WP_093766414_2	47.0	71.287	1	pp	WP_035849420_2 (pp) WP_093766414_2	71.29
4030	WP_035849420_2 (pp) WP_085014620_5	47.0	74.257	1	pp	WP_035849420_2 (pp) WP_085014620_5	74.26
4031	WP_035849420_2 (pp) WP_064110435_1	47.0	69.307	1	pp	WP_035849420_2 (pp) WP_064110435_1	69.31
4032	WP_035849420_2 (pp) WP_027743449_2	42.0	67.327	1	pp	WP_035849420_2 (pp) WP_027743449_2	67.33
4033	WP_027743449_2 (pp) WP_093766414_2	49.0	74.257	1	pp	WP_027743449_2 (pp) WP_093766414_2	74.26
4034	WP_027743449_2 (pp) WP_064110435_1	41.0	64.356	1	pp	WP_027743449_2 (pp) WP_064110435_1	64.36
4035	WP_093849541_1 (pp) WP_093766414_2	58.0	84.158	1	pp	WP_093849541_1 (pp) WP_093766414_2	84.16
4036	WP_093849541_1 (pp) WP_085014620_5	46.0	71.287	1	pp	WP_093849541_1 (pp) WP_085014620_5	71.29
4037	WP_093849541_1 (pp) WP_064110435_1	43.0	64.356	1	pp	WP_093849541_1 (pp) WP_064110435_1	64.36
4038	WP_093849541_1 (pp) WP_035849420_2	47.0	73.267	1	pp	WP_093849541_1 (pp) WP_035849420_2	73.27
4039	WP_093849541_1 (pp) WP_027743449_2	50.0	74.257	1	pp	WP_093849541_1 (pp) WP_027743449_2	74.26
4040	WP_085014622_7 (pp) WP_093766414_2	49.0	73.267	1	pp	WP_085014622_7 (pp) WP_093766414_2	73.27
4041	WP_085014622_7 (pp) WP_090039557_1	38.0	58.416	1	pp	WP_085014622_7 (pp) WP_090039557_1	58.42
4042	WP_085014622_7 (pp) WP_085014620_5	68.0	100.0	1	pp	WP_085014622_7 (pp) WP_085014620_5	100.0
4043	WP_085014622_7 (pp) WP_064110435_1	37.0	57.426	1	pp	WP_085014622_7 (pp) WP_064110435_1	57.43
4044	WP_085014622_7 (pp) WP_093655900_2	48.0	73.267	1	pp	WP_085014622_7 (pp) WP_093655900_2	73.27
4045	WP_085014622_7 (pp) WP_035849420_2	47.0	74.257	1	pp	WP_085014622_7 (pp) WP_035849420_2	74.26
4046	WP_085014622_7 (pp) WP_027743449_2	47.0	71.287	1	pp	WP_085014622_7 (pp) WP_027743449_2	71.29
4047	WP_085014622_7 (pp) WP_093849541_1	41.0	71.287	1	pp	WP_085014622_7 (pp) WP_093849541_1	71.29
4048	WP_064110435_1 (pp) WP_093766414_2	44.0	66.337	1	pp	WP_064110435_1 (pp) WP_093766414_2	66.34
4049	KZC95159_1 (pp) WP_053775823_1	60.0	97.778	1	pp	KZC95159_1 (pp) WP_053775823_1	97.78
4050	KZC95159_1 (pp) AWF97203_1	61.0	98.889	1	pp	KZC95159_1 (pp) AWF97203_1	98.89
4051	KZC95159_1 (pp) WP_043668521_1	61.0	98.889	1	pp	KZC95159_1 (pp) WP_043668521_1	98.89
4052	KZC95159_1 (pp) WP_086517141_1	61.0	98.889	1	pp	KZC95159_1 (pp) WP_086517141_1	98.89
4053	KZC95159_1 (pp) WP_104343881_1	61.0	98.889	1	pp	KZC95159_1 (pp) WP_104343881_1	98.89
4054	KZC95159_1 (pp) OUE24647_1	61.0	98.889	1	pp	KZC95159_1 (pp) OUE24647_1	98.89
4055	KZC95159_1 (pp) WP_086515725_1	61.0	98.889	1	pp	KZC95159_1 (pp) WP_086515725_1	98.89
4056	KZC95159_1 (pp) OUE10317_1	61.0	98.889	1	pp	KZC95159_1 (pp) OUE10317_1	98.89
4057	WP_086515725_1 (pp) WP_053775823_1	61.0	98.889	1	pp	WP_086515725_1 (pp) WP_053775823_1	98.89
4058	WP_086515725_1 (pp) AWF97203_1	61.0	100.0	1	pp	WP_086515725_1 (pp) AWF97203_1	100.0
4059	WP_086515725_1 (pp) WP_043668521_1	61.0	100.0	1	pp	WP_086515725_1 (pp) WP_043668521_1	100.0
4060	WP_086515725_1 (pp) WP_086517141_1	61.0	100.0	1	pp	WP_086515725_1 (pp) WP_086517141_1	100.0
4061	WP_086515725_1 (pp) WP_104343881_1	61.0	100.0	1	pp	WP_086515725_1 (pp) WP_104343881_1	100.0
4062	WP_086515725_1 (pp) OUE24647_1	61.0	100.0	1	pp	WP_086515725_1 (pp) OUE24647_1	100.0
4063	WP_086515725_1 (pp) OUE10317_1	61.0	100.0	1	pp	WP_086515725_1 (pp) OUE10317_1	100.0
4064	WP_104343881_1 (pp) WP_053775823_1	61.0	98.889	1	pp	WP_104343881_1 (pp) WP_053775823_1	98.89
4065	WP_104343881_1 (pp) AWF97203_1	61.0	100.0	1	pp	WP_104343881_1 (pp) AWF97203_1	100.0
4066	WP_104343881_1 (pp) WP_043668521_1	61.0	100.0	1	pp	WP_104343881_1 (pp) WP_043668521_1	100.0
4067	WP_104343881_1 (pp) WP_086517141_1	61.0	100.0	1	pp	WP_104343881_1 (pp) WP_086517141_1	100.0
4068	WP_104343881_1 (pp) OUE24647_1	61.0	100.0	1	pp	WP_104343881_1 (pp) OUE24647_1	100.0
4069	WP_104343881_1 (pp) OUE10317_1	61.0	100.0	1	pp	WP_104343881_1 (pp) OUE10317_1	100.0
4070	WP_043668521_1 (pp) AWF97203_1	61.0	100.0	1	pp	WP_043668521_1 (pp) AWF97203_1	100.0
4071	WP_043668521_1 (pp) WP_086517141_1	61.0	100.0	1	pp	WP_043668521_1 (pp) WP_086517141_1	100.0
4072	WP_043668521_1 (pp) OUE24647_1	61.0	100.0	1	pp	WP_043668521_1 (pp) OUE24647_1	100.0
4073	WP_043668521_1 (pp) OUE10317_1	61.0	100.0	1	pp	WP_043668521_1 (pp) OUE10317_1	100.0
4074	WP_086517141_1 (pp) AWF97203_1	61.0	100.0	1	pp	WP_086517141_1 (pp) AWF97203_1	100.0
4075	WP_086517141_1 (pp) OUE24647_1	61.0	100.0	1	pp	WP_086517141_1 (pp) OUE24647_1	100.0
4076	OUE10317_1 (pp) AWF97203_1	61.0	100.0	1	pp	OUE10317_1 (pp) AWF97203_1	100.0
4077	OUE10317_1 (pp) WP_086517141_1	61.0	100.0	1	pp	OUE10317_1 (pp) WP_086517141_1	100.0
4078	OUE10317_1 (pp) OUE24647_1	61.0	100.0	1	pp	OUE10317_1 (pp) OUE24647_1	100.0
4079	WP_053775823_1 (pp) AWF97203_1	61.0	98.889	1	pp	WP_053775823_1 (pp) AWF97203_1	98.89
4080	WP_053775823_1 (pp) WP_043668521_1	61.0	98.889	1	pp	WP_053775823_1 (pp) WP_043668521_1	98.89
4081	WP_053775823_1 (pp) WP_086517141_1	61.0	98.889	1	pp	WP_053775823_1 (pp) WP_086517141_1	98.89
4082	WP_053775823_1 (pp) OUE24647_1	61.0	98.889	1	pp	WP_053775823_1 (pp) OUE24647_1	98.89
4083	WP_053775823_1 (pp) OUE10317_1	61.0	98.889	1	pp	WP_053775823_1 (pp) OUE10317_1	98.89
4084	OUE24647_1 (pp) AWF97203_1	61.0	100.0	1	pp	OUE24647_1 (pp) AWF97203_1	100.0
4085	WP_037862255_3 (pp) WP_063758854_2	21.0	100.0	1	pp	WP_037862255_3 (pp) WP_063758854_2	100.0
4086	WP_037862255_3 (pp) WP_055553439_2	7.0	40.426	1	pp	WP_037862255_3 (pp) WP_055553439_2	54.29
4087	WP_055482843_1 (pp) KIE24863_5	7.0	40.741	1	pp	WP_055482843_1 (pp) KIE24863_5	44.9
4088	WP_055482843_1 (pp) WP_055553439_2	7.0	44.643	1	pp	WP_055482843_1 (pp) WP_055553439_2	53.19
4089	WP_055482843_1 (pp) WP_051458184_1	33.0	94.34	1	pp	WP_055482843_1 (pp) WP_051458184_1	94.34
4090	WP_055482843_1 (pp) AKJ13608_4	7.0	40.741	1	pp	WP_055482843_1 (pp) AKJ13608_4	44.9
4091	WP_055553439_2 (pp) KIE24863_5	16.0	63.043	1	pp	WP_055553439_2 (pp) KIE24863_5	61.7
4092	WP_055553439_2 (pp) WP_063758854_2	7.0	40.426	1	pp	WP_055553439_2 (pp) WP_063758854_2	54.29
4093	WP_055553439_2 (pp) WP_063832391_1	11.0	46.809	1	pp	WP_055553439_2 (pp) WP_063832391_1	50.0
4094	WP_055553439_2 (pp) AKJ13608_4	16.0	63.043	1	pp	WP_055553439_2 (pp) AKJ13608_4	61.7
4095	KIE24863_5 (pp) AKJ13608_4	32.0	100.0	1	pp	KIE24863_5 (pp) AKJ13608_4	100.0
4096	WP_051458184_1 (pp) WP_055553439_2	7.0	48.889	1	pp	WP_051458184_1 (pp) WP_055553439_2	46.81
4097	WP_004018421_2 (pp) WP_051458184_1	0.003	41.509	1	pp	WP_004018421_2 (pp) WP_051458184_1	41.51
4098	WP_037881970_2 (pp) WP_088799351_1	34.0	78.75	1	pp	WP_037881970_2 (pp) WP_088799351_1	78.75
4099	WP_037881970_2 (pp) WP_111415595_3	31.0	71.25	1	pp	WP_037881970_2 (pp) WP_111415595_3	71.25
4100	WP_037881970_2 (pp) WP_030040480_2	22.0	73.75	1	pp	WP_037881970_2 (pp) WP_030040480_2	73.75
4101	WP_037881970_2 (pp) WP_053747924_1	23.0	75.0	1	pp	WP_037881970_2 (pp) WP_053747924_1	75.0
4102	WP_037881970_2 (pp) WP_088799362_2	34.0	78.75	1	pp	WP_037881970_2 (pp) WP_088799362_2	78.75
4103	WP_037881970_2 (pp) WP_067603246_2	19.0	43.59	1	pp	WP_037881970_2 (pp) WP_067603246_2	41.98
4104	WP_067603246_2 (pp) WP_111415595_3	15.0	45.455	1	pp	WP_067603246_2 (pp) WP_111415595_3	43.75
4105	WP_067603246_2 (pp) WP_053747924_1	14.0	48.718	1	pp	WP_067603246_2 (pp) WP_053747924_1	47.5
4106	WP_067603246_2 (pp) WP_088799362_2	16.0	47.436	1	pp	WP_067603246_2 (pp) WP_088799362_2	46.25
4107	WP_030040480_2 (pp) WP_111415595_3	30.0	70.0	1	pp	WP_030040480_2 (pp) WP_111415595_3	70.0
4108	WP_030040480_2 (pp) WP_088799351_1	37.0	83.75	1	pp	WP_030040480_2 (pp) WP_088799351_1	83.75
4109	WP_030040480_2 (pp) WP_088799362_2	37.0	83.75	1	pp	WP_030040480_2 (pp) WP_088799362_2	83.75
4110	WP_030040480_2 (pp) WP_067603246_2	20.0	47.436	1	pp	WP_030040480_2 (pp) WP_067603246_2	46.25
4111	WP_030040480_2 (pp) WP_053747924_1	31.0	90.0	1	pp	WP_030040480_2 (pp) WP_053747924_1	90.0
4112	WP_030040480_2 (pp) WP_063274437_1	21.0	47.436	1	pp	WP_030040480_2 (pp) WP_063274437_1	46.25
4113	WP_030462613_1 (pp) WP_111415595_3	18.0	56.579	1	pp	WP_030462613_1 (pp) WP_111415595_3	53.75
4114	WP_030462613_1 (pp) WP_088799351_1	17.0	52.632	1	pp	WP_030462613_1 (pp) WP_088799351_1	50.0
4115	WP_030462613_1 (pp) WP_030040480_2	12.0	58.182	1	pp	WP_030462613_1 (pp) WP_030040480_2	40.0
4116	WP_030462613_1 (pp) WP_037881970_2	13.0	48.684	1	pp	WP_030462613_1 (pp) WP_037881970_2	45.68
4117	WP_030462613_1 (pp) WP_053747924_1	13.0	55.128	1	pp	WP_030462613_1 (pp) WP_053747924_1	53.75
4118	WP_030462613_1 (pp) WP_088799362_2	17.0	52.632	1	pp	WP_030462613_1 (pp) WP_088799362_2	50.0
4119	WP_030462613_1 (pp) WP_067603246_2	32.0	62.5	1	pp	WP_030462613_1 (pp) WP_067603246_2	61.73
4120	WP_088799351_1 (pp) WP_111415595_3	33.0	72.5	1	pp	WP_088799351_1 (pp) WP_111415595_3	72.5
4121	WP_088799351_1 (pp) WP_088799362_2	53.0	100.0	1	pp	WP_088799351_1 (pp) WP_088799362_2	100.0
4122	WP_088799351_1 (pp) WP_067603246_2	21.0	47.436	1	pp	WP_088799351_1 (pp) WP_067603246_2	46.25
4123	WP_088799351_1 (pp) WP_053747924_1	29.0	82.5	1	pp	WP_088799351_1 (pp) WP_053747924_1	82.5
4124	WP_111415595_3 (pp) WP_053747924_1	27.0	77.5	1	pp	WP_111415595_3 (pp) WP_053747924_1	77.5
4125	WP_088799362_2 (pp) WP_111415595_3	33.0	72.5	1	pp	WP_088799362_2 (pp) WP_111415595_3	72.5
4126	WP_088799362_2 (pp) WP_053747924_1	29.0	82.5	1	pp	WP_088799362_2 (pp) WP_053747924_1	82.5
4127	WP_063274437_1 (pp) WP_030462613_1	16.0	55.172	1	pp	WP_063274437_1 (pp) WP_030462613_1	40.0
4128	WP_063274437_1 (pp) WP_088799351_1	16.0	48.611	1	pp	WP_063274437_1 (pp) WP_088799351_1	43.75
4129	WP_063274437_1 (pp) WP_111415595_3	13.0	48.611	1	pp	WP_063274437_1 (pp) WP_111415595_3	43.75
4130	WP_063274437_1 (pp) WP_053747924_1	13.0	56.667	1	pp	WP_063274437_1 (pp) WP_053747924_1	42.5
4131	WP_063274437_1 (pp) WP_088799362_2	16.0	48.611	1	pp	WP_063274437_1 (pp) WP_088799362_2	43.75
4132	WP_062440803_1 (pp) WP_113985589_1	32.0	53.933	1	pp	WP_062440803_1 (pp) WP_113985589_1	53.93
4133	WP_062440803_1 (pp) SIR58548_1	38.0	60.674	1	pp	WP_062440803_1 (pp) SIR58548_1	59.34
4134	WP_062440803_1 (pp) WP_049570352_3	35.0	58.427	1	pp	WP_062440803_1 (pp) WP_049570352_3	57.14
4135	WP_062440803_1 (pp) WP_062349267_1	64.0	97.802	1	pp	WP_062440803_1 (pp) WP_062349267_1	97.8
4136	WP_062440803_1 (pp) WP_066366076_1	59.0	90.11	1	pp	WP_062440803_1 (pp) WP_066366076_1	90.11
4137	WP_062440803_1 (pp) WP_015622289_1	24.0	42.222	1	pp	WP_062440803_1 (pp) WP_015622289_1	41.76
4138	WP_062440803_1 (pp) WP_061300623_1	56.0	85.714	1	pp	WP_062440803_1 (pp) WP_061300623_1	85.71
4139	WP_062440803_1 (pp) WP_111167565_1	32.0	52.809	1	pp	WP_062440803_1 (pp) WP_111167565_1	52.81
4140	WP_114029832_1 (pp) WP_113985589_1	33.0	52.809	1	pp	WP_114029832_1 (pp) WP_113985589_1	52.81
4141	WP_114029832_1 (pp) SIR58548_1	42.0	64.13	1	pp	WP_114029832_1 (pp) SIR58548_1	64.13
4142	WP_114029832_1 (pp) WP_062349267_1	34.0	53.933	1	pp	WP_114029832_1 (pp) WP_062349267_1	52.75
4143	WP_114029832_1 (pp) WP_049570352_3	41.0	63.043	1	pp	WP_114029832_1 (pp) WP_049570352_3	63.04
4144	WP_114029832_1 (pp) WP_066366076_1	33.0	53.933	1	pp	WP_114029832_1 (pp) WP_066366076_1	52.75
4145	WP_114029832_1 (pp) WP_062440803_1	35.0	53.933	1	pp	WP_114029832_1 (pp) WP_062440803_1	52.75
4146	WP_114029832_1 (pp) WP_015622289_1	24.0	47.312	1	pp	WP_114029832_1 (pp) WP_015622289_1	47.83
4147	WP_114029832_1 (pp) WP_111167565_1	33.0	52.809	1	pp	WP_114029832_1 (pp) WP_111167565_1	52.81
4148	WP_114029832_1 (pp) WP_061300623_1	32.0	51.685	1	pp	WP_114029832_1 (pp) WP_061300623_1	50.55
4149	SIR58548_1 (pp) WP_113985589_1	42.0	62.921	1	pp	SIR58548_1 (pp) WP_113985589_1	62.92
4150	SIR58548_1 (pp) WP_062349267_1	38.0	59.551	1	pp	SIR58548_1 (pp) WP_062349267_1	58.24
4151	SIR58548_1 (pp) WP_049570352_3	44.0	67.391	1	pp	SIR58548_1 (pp) WP_049570352_3	65.96
4152	SIR58548_1 (pp) WP_066366076_1	38.0	60.674	1	pp	SIR58548_1 (pp) WP_066366076_1	59.34
4153	SIR58548_1 (pp) WP_015622289_1	28.0	50.562	1	pp	SIR58548_1 (pp) WP_015622289_1	48.39
4154	SIR58548_1 (pp) WP_111167565_1	43.0	64.045	1	pp	SIR58548_1 (pp) WP_111167565_1	64.05
4155	SIR58548_1 (pp) WP_061300623_1	41.0	65.169	1	pp	SIR58548_1 (pp) WP_061300623_1	63.74
4156	WP_066366076_1 (pp) WP_113985589_1	34.0	58.427	1	pp	WP_066366076_1 (pp) WP_113985589_1	58.43
4157	WP_066366076_1 (pp) WP_015622289_1	25.0	44.444	1	pp	WP_066366076_1 (pp) WP_015622289_1	43.96
4158	WP_066366076_1 (pp) WP_061300623_1	59.0	91.209	1	pp	WP_066366076_1 (pp) WP_061300623_1	91.21
4159	WP_066366076_1 (pp) WP_111167565_1	33.0	56.18	1	pp	WP_066366076_1 (pp) WP_111167565_1	56.18
4160	WP_066366076_1 (pp) WP_062349267_1	59.0	90.11	1	pp	WP_066366076_1 (pp) WP_062349267_1	90.11
4161	WP_066366076_1 (pp) WP_049570352_3	36.0	59.551	1	pp	WP_066366076_1 (pp) WP_049570352_3	58.24
4162	WP_062349267_1 (pp) WP_111167565_1	32.0	53.933	1	pp	WP_062349267_1 (pp) WP_111167565_1	53.93
4163	WP_049570352_3 (pp) WP_062349267_1	35.0	57.303	1	pp	WP_049570352_3 (pp) WP_062349267_1	56.04
4164	WP_049570352_3 (pp) WP_111167565_1	43.0	66.292	1	pp	WP_049570352_3 (pp) WP_111167565_1	66.29
4165	WP_049570352_3 (pp) WP_061300623_1	37.0	61.798	1	pp	WP_049570352_3 (pp) WP_061300623_1	60.44
4166	WP_015622289_1 (pp) WP_062349267_1	24.0	43.333	1	pp	WP_015622289_1 (pp) WP_062349267_1	42.86
4167	WP_015622289_1 (pp) WP_049570352_3	28.0	46.739	1	pp	WP_015622289_1 (pp) WP_049570352_3	46.24
4168	WP_015622289_1 (pp) WP_111167565_1	28.0	51.685	1	pp	WP_015622289_1 (pp) WP_111167565_1	51.69
4169	WP_015622289_1 (pp) WP_061300623_1	25.0	44.444	1	pp	WP_015622289_1 (pp) WP_061300623_1	43.96
4170	WP_061300623_1 (pp) WP_062349267_1	56.0	85.714	1	pp	WP_061300623_1 (pp) WP_062349267_1	85.71
4171	WP_061300623_1 (pp) WP_111167565_1	34.0	56.18	1	pp	WP_061300623_1 (pp) WP_111167565_1	56.18
4172	WP_113985589_1 (pp) WP_062349267_1	33.0	55.056	1	pp	WP_113985589_1 (pp) WP_062349267_1	55.06
4173	WP_113985589_1 (pp) WP_049570352_3	43.0	66.292	1	pp	WP_113985589_1 (pp) WP_049570352_3	66.29
4174	WP_113985589_1 (pp) WP_015622289_1	29.0	50.562	1	pp	WP_113985589_1 (pp) WP_015622289_1	50.56
4175	WP_113985589_1 (pp) WP_111167565_1	58.0	93.258	1	pp	WP_113985589_1 (pp) WP_111167565_1	93.26
4176	WP_113985589_1 (pp) WP_061300623_1	34.0	57.303	1	pp	WP_113985589_1 (pp) WP_061300623_1	57.3
4177	WP_018657395_2 (pp) WP_113979595_1	17.0	75.0	1	pp	WP_018657395_2 (pp) WP_113979595_1	75.0
4178	WP_018657395_2 (pp) WP_075941351_1	6.0	51.282	1	pp	WP_018657395_2 (pp) WP_075941351_1	50.0
4179	WP_018657395_2 (pp) WP_129800352_1	19.0	72.5	1	pp	WP_018657395_2 (pp) WP_129800352_1	72.5
4180	WP_018657395_2 (pp) WP_061294147_1	7.0	48.571	1	pp	WP_018657395_2 (pp) WP_061294147_1	48.57
4181	WP_018657395_2 (pp) WP_092533827_2	5.0	40.909	1	pp	WP_018657395_2 (pp) WP_092533827_2	45.0
4182	WP_018657395_2 (pp) WP_117404578_1	21.0	80.0	1	pp	WP_018657395_2 (pp) WP_117404578_1	80.0
4183	WP_018657395_2 (pp) WP_132172132_1	20.0	79.487	1	pp	WP_018657395_2 (pp) WP_132172132_1	77.5
4184	WP_018657395_2 (pp) WP_132339706_4	16.0	81.25	1	pp	WP_018657395_2 (pp) WP_132339706_4	74.29
4185	ALE82507_2 (pp) WP_092533827_2	17.0	73.171	1	pp	ALE82507_2 (pp) WP_092533827_2	66.67
4186	ALE82507_2 (pp) WP_117404578_1	4.0	45.238	1	pp	ALE82507_2 (pp) WP_117404578_1	44.19
4187	WP_132339706_4 (pp) WP_113979595_1	15.0	74.286	1	pp	WP_132339706_4 (pp) WP_113979595_1	74.29
4188	WP_132339706_4 (pp) WP_129800352_1	14.0	75.0	1	pp	WP_132339706_4 (pp) WP_129800352_1	68.57
4189	WP_132339706_4 (pp) WP_061294147_1	8.0	54.286	1	pp	WP_132339706_4 (pp) WP_061294147_1	54.29
4190	WP_132339706_4 (pp) WP_092533827_2	4.0	42.424	1	pp	WP_132339706_4 (pp) WP_092533827_2	40.0
4191	WP_132339706_4 (pp) WP_117404578_1	16.0	81.25	1	pp	WP_132339706_4 (pp) WP_117404578_1	74.29
4192	WP_132339706_4 (pp) WP_132172132_1	16.0	76.471	1	pp	WP_132339706_4 (pp) WP_132172132_1	74.29
4193	WP_075941351_1 (pp) WP_129800352_1	4.0	43.59	1	pp	WP_075941351_1 (pp) WP_129800352_1	42.5
4194	WP_075941351_1 (pp) WP_092533827_2	10.0	68.571	1	pp	WP_075941351_1 (pp) WP_092533827_2	60.0
4195	WP_075941351_1 (pp) WP_061294147_1	5.0	47.368	1	pp	WP_075941351_1 (pp) WP_061294147_1	51.43
4196	WP_075941351_1 (pp) WP_117404578_1	5.0	48.649	1	pp	WP_075941351_1 (pp) WP_117404578_1	45.0
4197	WP_075941351_1 (pp) WP_132172132_1	5.0	48.837	1	pp	WP_075941351_1 (pp) WP_132172132_1	52.5
4198	WP_075941351_1 (pp) ALE82507_2	9.0	64.706	1	pp	WP_075941351_1 (pp) ALE82507_2	55.0
4199	WP_075941351_1 (pp) WP_132339706_4	0.001	44.737	1	pp	WP_075941351_1 (pp) WP_132339706_4	48.57
4200	WP_113979595_1 (pp) WP_061294147_1	9.0	59.375	1	pp	WP_113979595_1 (pp) WP_061294147_1	54.29
4201	WP_113979595_1 (pp) WP_117404578_1	17.0	75.0	1	pp	WP_113979595_1 (pp) WP_117404578_1	75.0
4202	WP_129800352_1 (pp) WP_113979595_1	16.0	69.444	1	pp	WP_129800352_1 (pp) WP_113979595_1	69.44
4203	WP_129800352_1 (pp) WP_061294147_1	5.0	46.875	1	pp	WP_129800352_1 (pp) WP_061294147_1	42.86
4204	WP_129800352_1 (pp) WP_117404578_1	21.0	83.721	1	pp	WP_129800352_1 (pp) WP_117404578_1	90.0
4205	WP_061294147_1 (pp) WP_117404578_1	7.0	51.429	1	pp	WP_061294147_1 (pp) WP_117404578_1	51.43
4206	WP_092533827_2 (pp) WP_117404578_1	4.0	41.86	1	pp	WP_092533827_2 (pp) WP_117404578_1	41.86
4207	WP_132172132_1 (pp) WP_113979595_1	17.0	72.222	1	pp	WP_132172132_1 (pp) WP_113979595_1	72.22
4208	WP_132172132_1 (pp) WP_129800352_1	20.0	84.615	1	pp	WP_132172132_1 (pp) WP_129800352_1	82.5
4209	WP_132172132_1 (pp) WP_061294147_1	7.0	53.125	1	pp	WP_132172132_1 (pp) WP_061294147_1	48.57
4210	WP_132172132_1 (pp) WP_092533827_2	5.0	42.222	1	pp	WP_132172132_1 (pp) WP_092533827_2	42.22
4211	WP_132172132_1 (pp) WP_117404578_1	22.0	81.395	1	pp	WP_132172132_1 (pp) WP_117404578_1	81.39
4212	WP_017559667_2 (pp) WP_017608824_2	7.0	66.667	1	pp	WP_017559667_2 (pp) WP_017608824_2	58.54
4213	WP_017559667_2 (pp) WP_017559667_1	14.0	93.103	1	pp	WP_017559667_2 (pp) WP_017559667_1	65.85
4214	WP_017559667_2 (pp) WP_046468711_3	4.0	54.545	1	pp	WP_017559667_2 (pp) WP_046468711_3	43.9
4215	OFK71393_2 (pp) WP_083296694_1	31.0	100.0	1	pp	OFK71393_2 (pp) WP_083296694_1	100.0
4216	WP_017608824_2 (pp) OFK71393_2	4.0	41.304	1	pp	WP_017608824_2 (pp) OFK71393_2	46.34
4217	WP_017608824_2 (pp) WP_017559667_1	8.0	69.444	1	pp	WP_017608824_2 (pp) WP_017559667_1	60.98
4218	WP_017608824_2 (pp) WP_131103335_5	4.0	48.649	1	pp	WP_017608824_2 (pp) WP_131103335_5	43.9
4219	WP_017608824_2 (pp) WP_083296694_1	4.0	41.304	1	pp	WP_017608824_2 (pp) WP_083296694_1	46.34
4220	WP_046468711_3 (pp) WP_120205519_2	4.0	66.667	1	pp	WP_046468711_3 (pp) WP_120205519_2	41.86
4221	WP_046468711_3 (pp) WP_131103335_5	4.0	55.882	1	pp	WP_046468711_3 (pp) WP_131103335_5	42.22
4222	WP_046468711_3 (pp) WP_101559196_2	0.001	70.833	1	pp	WP_046468711_3 (pp) WP_101559196_2	40.48
4223	WP_046468711_3 (pp) WP_119835460_2	4.0	66.667	1	pp	WP_046468711_3 (pp) WP_119835460_2	41.86
4224	WP_120205519_2 (pp) WP_131103335_5	10.0	68.75	1	pp	WP_120205519_2 (pp) WP_131103335_5	51.16
4225	WP_120205519_2 (pp) WP_119835460_2	26.0	100.0	1	pp	WP_120205519_2 (pp) WP_119835460_2	100.0
4226	WP_120205519_2 (pp) WP_101559196_2	15.0	77.5	1	pp	WP_120205519_2 (pp) WP_101559196_2	73.81
4227	WP_101559196_2 (pp) WP_119835460_2	15.0	77.5	1	pp	WP_101559196_2 (pp) WP_119835460_2	73.81
4228	WP_131103335_5 (pp) WP_119835460_2	9.0	68.75	1	pp	WP_131103335_5 (pp) WP_119835460_2	51.16
4229	WP_131103335_5 (pp) WP_101559196_2	7.0	72.414	1	pp	WP_131103335_5 (pp) WP_101559196_2	50.0
4230	WP_091114658_1 (pp) WP_110909804_2	50.0	88.608	1	pp	WP_091114658_1 (pp) WP_110909804_2	86.42
4231	WP_091114658_1 (pp) PYG35723_2	50.0	88.608	1	pp	WP_091114658_1 (pp) PYG35723_2	86.42
4232	WP_091114658_1 (pp) WP_089404560_2	47.0	79.012	1	pp	WP_091114658_1 (pp) WP_089404560_2	79.01
4233	WP_091114658_1 (pp) WP_091365795_1	52.0	92.593	1	pp	WP_091114658_1 (pp) WP_091365795_1	92.59
4234	WP_091114658_1 (pp) WP_075012634_1	31.0	75.0	1	pp	WP_091114658_1 (pp) WP_075012634_1	72.73
4235	WP_091114658_1 (pp) WP_093583210_1	47.0	81.481	1	pp	WP_091114658_1 (pp) WP_093583210_1	81.48
4236	WP_091114658_1 (pp) WP_106275543_1	54.0	93.827	1	pp	WP_091114658_1 (pp) WP_106275543_1	93.83
4237	WP_091114658_1 (pp) SDC53518_1	52.0	92.593	1	pp	WP_091114658_1 (pp) SDC53518_1	92.59
4238	WP_091114658_1 (pp) SFO01480_1	31.0	75.0	1	pp	WP_091114658_1 (pp) SFO01480_1	72.73
4239	WP_106275543_1 (pp) WP_110909804_2	50.0	88.608	1	pp	WP_106275543_1 (pp) WP_110909804_2	86.42
4240	WP_106275543_1 (pp) PYG35723_2	50.0	88.608	1	pp	WP_106275543_1 (pp) PYG35723_2	86.42
4241	WP_106275543_1 (pp) WP_075012634_1	31.0	75.0	1	pp	WP_106275543_1 (pp) WP_075012634_1	72.73
4242	WP_106275543_1 (pp) WP_089404560_2	45.0	76.543	1	pp	WP_106275543_1 (pp) WP_089404560_2	76.54
4243	WP_106275543_1 (pp) WP_091365795_1	51.0	88.889	1	pp	WP_106275543_1 (pp) WP_091365795_1	88.89
4244	WP_106275543_1 (pp) WP_093583210_1	46.0	80.247	1	pp	WP_106275543_1 (pp) WP_093583210_1	80.25
4245	WP_106275543_1 (pp) SDC53518_1	51.0	88.889	1	pp	WP_106275543_1 (pp) SDC53518_1	88.89
4246	SFO01480_1 (pp) WP_110909804_2	33.0	78.462	1	pp	SFO01480_1 (pp) WP_110909804_2	77.27
4247	SFO01480_1 (pp) PYG35723_2	33.0	78.462	1	pp	SFO01480_1 (pp) PYG35723_2	77.27
4248	SFO01480_1 (pp) WP_089404560_2	28.0	77.778	1	pp	SFO01480_1 (pp) WP_089404560_2	63.64
4249	SFO01480_1 (pp) WP_091365795_1	31.0	75.0	1	pp	SFO01480_1 (pp) WP_091365795_1	72.73
4250	SFO01480_1 (pp) WP_075012634_1	43.0	100.0	1	pp	SFO01480_1 (pp) WP_075012634_1	100.0
4251	SFO01480_1 (pp) WP_093583210_1	35.0	84.615	1	pp	SFO01480_1 (pp) WP_093583210_1	83.33
4252	SFO01480_1 (pp) WP_106275543_1	31.0	75.0	1	pp	SFO01480_1 (pp) WP_106275543_1	72.73
4253	SFO01480_1 (pp) SDC53518_1	31.0	75.0	1	pp	SFO01480_1 (pp) SDC53518_1	72.73
4254	PYG35723_2 (pp) WP_075012634_1	33.0	78.462	1	pp	PYG35723_2 (pp) WP_075012634_1	77.27
4255	PYG35723_2 (pp) WP_089404560_2	44.0	78.481	1	pp	PYG35723_2 (pp) WP_089404560_2	76.54
4256	PYG35723_2 (pp) WP_091365795_1	46.0	82.278	1	pp	PYG35723_2 (pp) WP_091365795_1	80.25
4257	PYG35723_2 (pp) SDC53518_1	46.0	82.278	1	pp	PYG35723_2 (pp) SDC53518_1	80.25
4258	WP_093583210_1 (pp) PYG35723_2	49.0	86.585	1	pp	WP_093583210_1 (pp) PYG35723_2	86.58
4259	WP_093583210_1 (pp) WP_075012634_1	35.0	84.615	1	pp	WP_093583210_1 (pp) WP_075012634_1	83.33
4260	WP_093583210_1 (pp) WP_089404560_2	41.0	72.84	1	pp	WP_093583210_1 (pp) WP_089404560_2	72.84
4261	WP_093583210_1 (pp) WP_091365795_1	43.0	77.778	1	pp	WP_093583210_1 (pp) WP_091365795_1	77.78
4262	WP_093583210_1 (pp) SDC53518_1	43.0	77.778	1	pp	WP_093583210_1 (pp) SDC53518_1	77.78
4263	WP_110909804_2 (pp) PYG35723_2	58.0	100.0	1	pp	WP_110909804_2 (pp) PYG35723_2	100.0
4264	WP_110909804_2 (pp) WP_075012634_1	33.0	78.462	1	pp	WP_110909804_2 (pp) WP_075012634_1	77.27
4265	WP_110909804_2 (pp) WP_089404560_2	44.0	78.481	1	pp	WP_110909804_2 (pp) WP_089404560_2	76.54
4266	WP_110909804_2 (pp) WP_091365795_1	46.0	82.278	1	pp	WP_110909804_2 (pp) WP_091365795_1	80.25
4267	WP_110909804_2 (pp) WP_093583210_1	49.0	86.585	1	pp	WP_110909804_2 (pp) WP_093583210_1	86.58
4268	WP_110909804_2 (pp) SDC53518_1	46.0	82.278	1	pp	WP_110909804_2 (pp) SDC53518_1	80.25
4269	SDC53518_1 (pp) WP_075012634_1	31.0	75.0	1	pp	SDC53518_1 (pp) WP_075012634_1	72.73
4270	SDC53518_1 (pp) WP_089404560_2	43.0	74.074	1	pp	SDC53518_1 (pp) WP_089404560_2	74.07
4271	SDC53518_1 (pp) WP_091365795_1	57.0	100.0	1	pp	SDC53518_1 (pp) WP_091365795_1	100.0
4272	WP_089404560_2 (pp) WP_091365795_1	43.0	74.074	1	pp	WP_089404560_2 (pp) WP_091365795_1	74.07
4273	WP_075012634_1 (pp) WP_089404560_2	28.0	77.778	1	pp	WP_075012634_1 (pp) WP_089404560_2	63.64
4274	WP_075012634_1 (pp) WP_091365795_1	31.0	75.0	1	pp	WP_075012634_1 (pp) WP_091365795_1	72.73
4275	AKH86621_2 (pp) WP_131561563_1	13.0	54.348	1	pp	AKH86621_2 (pp) WP_131561563_1	44.64
4276	AKH86621_2 (pp) RZU94771_3	37.0	98.333	1	pp	AKH86621_2 (pp) RZU94771_3	98.33
4277	AKH86621_2 (pp) PJJ39560_3	37.0	100.0	1	pp	AKH86621_2 (pp) PJJ39560_3	100.0
4278	AKH86621_2 (pp) WP_078564093_3	37.0	100.0	1	pp	AKH86621_2 (pp) WP_078564093_3	100.0
4279	AKH86621_2 (pp) WP_100302786_3	37.0	100.0	1	pp	AKH86621_2 (pp) WP_100302786_3	100.0
4280	AKH86621_2 (pp) WP_052770273_2	37.0	100.0	1	pp	AKH86621_2 (pp) WP_052770273_2	100.0
4281	AKH86621_2 (pp) WP_078572841_3	37.0	98.333	1	pp	AKH86621_2 (pp) WP_078572841_3	98.33
4282	AKH86621_2 (pp) ANS70161_2	13.0	54.348	1	pp	AKH86621_2 (pp) ANS70161_2	44.64
4283	AKH86621_2 (pp) AXG59058_2	13.0	54.348	1	pp	AKH86621_2 (pp) AXG59058_2	44.64
4284	ANS70161_2 (pp) WP_131561563_1	35.0	92.857	1	pp	ANS70161_2 (pp) WP_131561563_1	92.86
4285	ANS70161_2 (pp) RZU94771_3	13.0	52.174	1	pp	ANS70161_2 (pp) RZU94771_3	42.86
4286	ANS70161_2 (pp) PJJ39560_3	13.0	54.348	1	pp	ANS70161_2 (pp) PJJ39560_3	44.64
4287	ANS70161_2 (pp) WP_078564093_3	13.0	54.348	1	pp	ANS70161_2 (pp) WP_078564093_3	44.64
4288	ANS70161_2 (pp) WP_100302786_3	13.0	54.348	1	pp	ANS70161_2 (pp) WP_100302786_3	44.64
4289	ANS70161_2 (pp) WP_052770273_2	13.0	54.348	1	pp	ANS70161_2 (pp) WP_052770273_2	44.64
4290	ANS70161_2 (pp) WP_078572841_3	13.0	52.174	1	pp	ANS70161_2 (pp) WP_078572841_3	42.86
4291	ANS70161_2 (pp) AXG59058_2	37.0	100.0	1	pp	ANS70161_2 (pp) AXG59058_2	100.0
4292	PJJ39560_3 (pp) RZU94771_3	37.0	98.333	1	pp	PJJ39560_3 (pp) RZU94771_3	98.33
4293	PJJ39560_3 (pp) WP_078564093_3	37.0	100.0	1	pp	PJJ39560_3 (pp) WP_078564093_3	100.0
4294	PJJ39560_3 (pp) WP_100302786_3	37.0	100.0	1	pp	PJJ39560_3 (pp) WP_100302786_3	100.0
4295	PJJ39560_3 (pp) WP_052770273_2	37.0	100.0	1	pp	PJJ39560_3 (pp) WP_052770273_2	100.0
4296	PJJ39560_3 (pp) AXG59058_2	13.0	54.348	1	pp	PJJ39560_3 (pp) AXG59058_2	44.64
4297	WP_078572841_3 (pp) PJJ39560_3	37.0	98.333	1	pp	WP_078572841_3 (pp) PJJ39560_3	98.33
4298	WP_078572841_3 (pp) RZU94771_3	38.0	100.0	1	pp	WP_078572841_3 (pp) RZU94771_3	100.0
4299	WP_078572841_3 (pp) WP_078564093_3	37.0	98.333	1	pp	WP_078572841_3 (pp) WP_078564093_3	98.33
4300	WP_078572841_3 (pp) WP_100302786_3	37.0	98.333	1	pp	WP_078572841_3 (pp) WP_100302786_3	98.33
4301	WP_078572841_3 (pp) WP_052770273_2	37.0	98.333	1	pp	WP_078572841_3 (pp) WP_052770273_2	98.33
4302	WP_078572841_3 (pp) AXG59058_2	13.0	52.174	1	pp	WP_078572841_3 (pp) AXG59058_2	42.86
4303	WP_131561563_1 (pp) RZU94771_3	13.0	52.174	1	pp	WP_131561563_1 (pp) RZU94771_3	42.86
4304	WP_131561563_1 (pp) PJJ39560_3	13.0	54.348	1	pp	WP_131561563_1 (pp) PJJ39560_3	44.64
4305	WP_131561563_1 (pp) WP_078564093_3	13.0	54.348	1	pp	WP_131561563_1 (pp) WP_078564093_3	44.64
4306	WP_131561563_1 (pp) WP_100302786_3	13.0	54.348	1	pp	WP_131561563_1 (pp) WP_100302786_3	44.64
4307	WP_131561563_1 (pp) WP_052770273_2	13.0	54.348	1	pp	WP_131561563_1 (pp) WP_052770273_2	44.64
4308	WP_131561563_1 (pp) WP_078572841_3	13.0	52.174	1	pp	WP_131561563_1 (pp) WP_078572841_3	42.86
4309	WP_131561563_1 (pp) AXG59058_2	35.0	92.857	1	pp	WP_131561563_1 (pp) AXG59058_2	92.86
4310	RZU94771_3 (pp) WP_078564093_3	37.0	98.333	1	pp	RZU94771_3 (pp) WP_078564093_3	98.33
4311	RZU94771_3 (pp) WP_100302786_3	37.0	98.333	1	pp	RZU94771_3 (pp) WP_100302786_3	98.33
4312	RZU94771_3 (pp) WP_052770273_2	37.0	98.333	1	pp	RZU94771_3 (pp) WP_052770273_2	98.33
4313	RZU94771_3 (pp) AXG59058_2	13.0	52.174	1	pp	RZU94771_3 (pp) AXG59058_2	42.86
4314	WP_052770273_2 (pp) WP_078564093_3	37.0	100.0	1	pp	WP_052770273_2 (pp) WP_078564093_3	100.0
4315	WP_052770273_2 (pp) WP_100302786_3	37.0	100.0	1	pp	WP_052770273_2 (pp) WP_100302786_3	100.0
4316	WP_052770273_2 (pp) AXG59058_2	13.0	54.348	1	pp	WP_052770273_2 (pp) AXG59058_2	44.64
4317	WP_078564093_3 (pp) WP_100302786_3	37.0	100.0	1	pp	WP_078564093_3 (pp) WP_100302786_3	100.0
4318	AXG59058_2 (pp) WP_078564093_3	13.0	54.348	1	pp	AXG59058_2 (pp) WP_078564093_3	44.64
4319	AXG59058_2 (pp) WP_100302786_3	13.0	54.348	1	pp	AXG59058_2 (pp) WP_100302786_3	44.64
4320	WP_092556553_3 (pp) WP_006347379_1	12.0	52.941	1	pp	WP_092556553_3 (pp) WP_006347379_1	44.26
4321	WP_092556553_3 (pp) WP_100806338_6	15.0	54.839	1	pp	WP_092556553_3 (pp) WP_100806338_6	46.58
4322	WP_092556553_3 (pp) WP_124286732_7	14.0	52.632	1	pp	WP_092556553_3 (pp) WP_124286732_7	41.1
4323	WP_092556553_3 (pp) WP_030633187_1	12.0	48.333	1	pp	WP_092556553_3 (pp) WP_030633187_1	40.84
4324	WP_092556553_3 (pp) WP_114032054_1	13.0	48.438	1	pp	WP_092556553_3 (pp) WP_114032054_1	47.69
4325	WP_092556553_3 (pp) WP_100806338_7	17.0	55.0	1	pp	WP_092556553_3 (pp) WP_100806338_7	45.21
4326	WP_092556553_3 (pp) WP_023554016_3	11.0	50.0	1	pp	WP_092556553_3 (pp) WP_023554016_3	40.85
4327	WP_017589866_3 (pp) WP_030633187_1	7.0	46.296	1	pp	WP_017589866_3 (pp) WP_030633187_1	43.1
4328	WP_100806338_6 (pp) WP_006347379_1	13.0	49.091	1	pp	WP_100806338_6 (pp) WP_006347379_1	44.26
4329	WP_100806338_6 (pp) WP_030633187_1	11.0	46.154	1	pp	WP_100806338_6 (pp) WP_030633187_1	42.25
4330	WP_100806338_6 (pp) WP_114032054_1	10.0	45.312	1	pp	WP_100806338_6 (pp) WP_114032054_1	44.61
4331	WP_100806338_6 (pp) WP_100806338_7	44.0	81.818	1	pp	WP_100806338_6 (pp) WP_100806338_7	84.0
4332	WP_023554016_3 (pp) WP_006347379_1	9.0	44.643	1	pp	WP_023554016_3 (pp) WP_006347379_1	40.98
4333	WP_023554016_3 (pp) WP_100806338_6	9.0	42.647	1	pp	WP_023554016_3 (pp) WP_100806338_6	40.85
4334	WP_023554016_3 (pp) WP_059190156_4	8.0	42.647	1	pp	WP_023554016_3 (pp) WP_059190156_4	42.65
4335	WP_023554016_3 (pp) WP_124286732_7	9.0	50.847	1	pp	WP_023554016_3 (pp) WP_124286732_7	42.25
4336	WP_023554016_3 (pp) WP_030633187_1	9.0	42.254	1	pp	WP_023554016_3 (pp) WP_030633187_1	42.25
4337	WP_023554016_3 (pp) WP_114032054_1	11.0	48.214	1	pp	WP_023554016_3 (pp) WP_114032054_1	41.54
4338	WP_100806338_7 (pp) WP_006347379_1	16.0	52.83	1	pp	WP_100806338_7 (pp) WP_006347379_1	45.9
4339	WP_100806338_7 (pp) WP_030633187_1	13.0	46.875	1	pp	WP_100806338_7 (pp) WP_030633187_1	42.25
4340	WP_114032054_1 (pp) WP_006347379_1	9.0	54.0	1	pp	WP_114032054_1 (pp) WP_006347379_1	44.26
4341	WP_114032054_1 (pp) WP_124286732_7	8.0	45.0	1	pp	WP_114032054_1 (pp) WP_124286732_7	41.54
4342	WP_114032054_1 (pp) WP_100806338_7	11.0	45.161	1	pp	WP_114032054_1 (pp) WP_100806338_7	43.08
4343	WP_114032054_1 (pp) WP_030633187_1	12.0	49.18	1	pp	WP_114032054_1 (pp) WP_030633187_1	46.15
4344	WP_123603612_2 (pp) WP_006347379_1	15.0	59.615	1	pp	WP_123603612_2 (pp) WP_006347379_1	50.82
4345	WP_123603612_2 (pp) WP_030633187_1	13.0	59.615	1	pp	WP_123603612_2 (pp) WP_030633187_1	43.66
4346	WP_123603612_2 (pp) WP_114032054_1	11.0	51.923	1	pp	WP_123603612_2 (pp) WP_114032054_1	41.54
4347	SBO93312_1 (pp) WP_080042116_1	19.0	86.842	1	pp	SBO93312_1 (pp) WP_080042116_1	86.84
4348	SBO93312_1 (pp) WP_111170305_1	9.0	50.0	1	pp	SBO93312_1 (pp) WP_111170305_1	50.0
4349	SBO93312_1 (pp) WP_090941614_2	10.0	63.415	1	pp	SBO93312_1 (pp) WP_090941614_2	68.42
4350	SBO93312_1 (pp) WP_113984581_2	9.0	52.778	1	pp	SBO93312_1 (pp) WP_113984581_2	50.0
4351	SBO93312_1 (pp) WP_012891705_1	11.0	60.0	1	pp	SBO93312_1 (pp) WP_012891705_1	63.16
4352	SBO93312_1 (pp) SPL97283_1	19.0	86.842	1	pp	SBO93312_1 (pp) SPL97283_1	86.84
4353	SBO93312_1 (pp) WP_103960548_2	13.0	74.359	1	pp	SBO93312_1 (pp) WP_103960548_2	76.32
4354	SBO93312_1 (pp) WP_084772427_3	11.0	57.895	1	pp	SBO93312_1 (pp) WP_084772427_3	57.89
4355	SBO93312_1 (pp) SEG99236_2	13.0	74.359	1	pp	SBO93312_1 (pp) SEG99236_2	76.32
4356	SPL97283_1 (pp) WP_080042116_1	25.0	100.0	1	pp	SPL97283_1 (pp) WP_080042116_1	100.0
4357	SPL97283_1 (pp) WP_012891705_1	10.0	61.111	1	pp	SPL97283_1 (pp) WP_012891705_1	55.0
4358	SPL97283_1 (pp) WP_103960548_2	12.0	66.667	1	pp	SPL97283_1 (pp) WP_103960548_2	66.67
4359	SPL97283_1 (pp) WP_111170305_1	9.0	52.632	1	pp	SPL97283_1 (pp) WP_111170305_1	50.0
4360	SPL97283_1 (pp) WP_090941614_2	11.0	65.0	1	pp	SPL97283_1 (pp) WP_090941614_2	65.0
4361	SPL97283_1 (pp) WP_113984581_2	9.0	52.778	1	pp	SPL97283_1 (pp) WP_113984581_2	47.5
4362	SPL97283_1 (pp) WP_084772427_3	13.0	61.538	1	pp	SPL97283_1 (pp) WP_084772427_3	60.0
4363	SPL97283_1 (pp) SEG99236_2	12.0	66.667	1	pp	SPL97283_1 (pp) SEG99236_2	66.67
4364	WP_103960548_2 (pp) WP_080042116_1	12.0	66.667	1	pp	WP_103960548_2 (pp) WP_080042116_1	66.67
4365	WP_103960548_2 (pp) WP_012891705_1	12.0	60.0	1	pp	WP_103960548_2 (pp) WP_012891705_1	61.54
4366	WP_103960548_2 (pp) WP_113984581_2	12.0	66.667	1	pp	WP_103960548_2 (pp) WP_113984581_2	56.41
4367	WP_103960548_2 (pp) WP_084772427_3	14.0	66.667	1	pp	WP_103960548_2 (pp) WP_084772427_3	66.67
4368	WP_103960548_2 (pp) SEG99236_2	24.0	100.0	1	pp	WP_103960548_2 (pp) SEG99236_2	100.0
4369	WP_090941614_2 (pp) WP_080042116_1	11.0	65.0	1	pp	WP_090941614_2 (pp) WP_080042116_1	65.0
4370	WP_090941614_2 (pp) WP_012891705_1	9.0	55.0	1	pp	WP_090941614_2 (pp) WP_012891705_1	55.0
4371	WP_090941614_2 (pp) WP_103960548_2	12.0	65.854	1	pp	WP_090941614_2 (pp) WP_103960548_2	69.23
4372	WP_090941614_2 (pp) WP_134033092_1	0.048	40.0	1	pp	WP_090941614_2 (pp) WP_134033092_1	43.9
4373	WP_090941614_2 (pp) WP_113984581_2	9.0	60.606	1	pp	WP_090941614_2 (pp) WP_113984581_2	48.78
4374	WP_090941614_2 (pp) WP_084772427_3	12.0	65.854	1	pp	WP_090941614_2 (pp) WP_084772427_3	65.85
4375	WP_090941614_2 (pp) SEG99236_2	12.0	65.854	1	pp	WP_090941614_2 (pp) SEG99236_2	69.23
4376	WP_113984581_2 (pp) WP_080042116_1	8.0	52.778	1	pp	WP_113984581_2 (pp) WP_080042116_1	47.5
4377	WP_113984581_2 (pp) WP_012891705_1	11.0	64.706	1	pp	WP_113984581_2 (pp) WP_012891705_1	55.0
4378	WP_113984581_2 (pp) WP_084772427_3	10.0	63.636	1	pp	WP_113984581_2 (pp) WP_084772427_3	51.22
4379	WP_084772427_3 (pp) WP_080042116_1	13.0	61.538	1	pp	WP_084772427_3 (pp) WP_080042116_1	60.0
4380	WP_084772427_3 (pp) WP_012891705_1	8.0	58.333	1	pp	WP_084772427_3 (pp) WP_012891705_1	52.5
4381	SEG99236_2 (pp) WP_080042116_1	12.0	66.667	1	pp	SEG99236_2 (pp) WP_080042116_1	66.67
4382	SEG99236_2 (pp) WP_012891705_1	12.0	60.0	1	pp	SEG99236_2 (pp) WP_012891705_1	61.54
4383	SEG99236_2 (pp) WP_113984581_2	12.0	66.667	1	pp	SEG99236_2 (pp) WP_113984581_2	56.41
4384	SEG99236_2 (pp) WP_084772427_3	14.0	66.667	1	pp	SEG99236_2 (pp) WP_084772427_3	66.67
4385	WP_111170305_1 (pp) WP_080042116_1	8.0	52.632	1	pp	WP_111170305_1 (pp) WP_080042116_1	50.0
4386	WP_111170305_1 (pp) WP_012891705_1	11.0	60.0	1	pp	WP_111170305_1 (pp) WP_012891705_1	60.0
4387	WP_111170305_1 (pp) WP_103960548_2	13.0	58.974	1	pp	WP_111170305_1 (pp) WP_103960548_2	58.97
4388	WP_111170305_1 (pp) WP_090941614_2	9.0	55.882	1	pp	WP_111170305_1 (pp) WP_090941614_2	46.34
4389	WP_111170305_1 (pp) WP_113984581_2	19.0	70.0	1	pp	WP_111170305_1 (pp) WP_113984581_2	70.0
4390	WP_111170305_1 (pp) WP_084772427_3	10.0	60.0	1	pp	WP_111170305_1 (pp) WP_084772427_3	51.22
4391	WP_111170305_1 (pp) SEG99236_2	13.0	58.974	1	pp	WP_111170305_1 (pp) SEG99236_2	58.97
4392	WP_080042116_1 (pp) WP_012891705_1	10.0	61.111	1	pp	WP_080042116_1 (pp) WP_012891705_1	55.0
4393	WP_113979657_4 (pp) WP_027760735_1	32.0	50.98	1	pp	WP_113979657_4 (pp) WP_027760735_1	50.49
4394	WP_113979657_4 (pp) WP_079171959_1	29.0	50.0	1	pp	WP_113979657_4 (pp) WP_079171959_1	48.54
4395	WP_113979657_4 (pp) WP_114021280_1	30.0	48.421	1	pp	WP_113979657_4 (pp) WP_114021280_1	44.66
4396	WP_113979657_4 (pp) WP_111166051_7	34.0	93.846	1	pp	WP_113979657_4 (pp) WP_111166051_7	93.85
4397	WP_113979657_4 (pp) OEV01037_1	32.0	50.98	1	pp	WP_113979657_4 (pp) OEV01037_1	50.49
4398	WP_113979657_4 (pp) WP_114018158_1	30.0	48.421	1	pp	WP_113979657_4 (pp) WP_114018158_1	44.66
4399	WP_113979657_4 (pp) WP_099881056_1	29.0	48.454	1	pp	WP_113979657_4 (pp) WP_099881056_1	45.63
4400	WP_113979657_4 (pp) WP_086575168_3	36.0	83.077	1	pp	WP_113979657_4 (pp) WP_086575168_3	83.08
4401	WP_114018158_1 (pp) WP_027760735_1	62.0	81.25	1	pp	WP_114018158_1 (pp) WP_027760735_1	81.98
4402	WP_114018158_1 (pp) WP_079171959_1	58.0	83.654	1	pp	WP_114018158_1 (pp) WP_079171959_1	78.38
4403	WP_114018158_1 (pp) WP_084211656_2	25.0	47.727	1	pp	WP_114018158_1 (pp) WP_084211656_2	43.75
4404	WP_114018158_1 (pp) WP_114021280_1	77.0	95.495	1	pp	WP_114018158_1 (pp) WP_114021280_1	95.5
4405	WP_114018158_1 (pp) WP_111166051_7	15.0	50.794	1	pp	WP_114018158_1 (pp) WP_111166051_7	49.23
4406	WP_114018158_1 (pp) WP_111035529_1	24.0	43.689	1	pp	WP_114018158_1 (pp) WP_111035529_1	43.69
4407	WP_114018158_1 (pp) WP_099881056_1	66.0	87.273	1	pp	WP_114018158_1 (pp) WP_099881056_1	86.49
4408	WP_114018158_1 (pp) OEV01037_1	62.0	81.25	1	pp	WP_114018158_1 (pp) OEV01037_1	81.98
4409	WP_114018158_1 (pp) WP_086575168_3	20.0	52.459	1	pp	WP_114018158_1 (pp) WP_086575168_3	49.23
4410	WP_084211656_2 (pp) WP_027760735_1	24.0	50.0	1	pp	WP_084211656_2 (pp) WP_027760735_1	41.67
4411	WP_084211656_2 (pp) OEV01037_1	24.0	50.0	1	pp	WP_084211656_2 (pp) OEV01037_1	41.67
4412	WP_084211656_2 (pp) WP_086575168_3	18.0	48.387	1	pp	WP_084211656_2 (pp) WP_086575168_3	46.15
4413	WP_079171959_1 (pp) WP_027760735_1	73.0	92.793	1	pp	WP_079171959_1 (pp) WP_027760735_1	91.96
4414	WP_079171959_1 (pp) WP_084211656_2	25.0	52.564	1	pp	WP_079171959_1 (pp) WP_084211656_2	42.71
4415	WP_079171959_1 (pp) WP_111166051_7	14.0	52.381	1	pp	WP_079171959_1 (pp) WP_111166051_7	50.77
4416	WP_079171959_1 (pp) WP_111035529_1	22.0	43.0	1	pp	WP_079171959_1 (pp) WP_111035529_1	41.75
4417	WP_079171959_1 (pp) OEV01037_1	73.0	92.793	1	pp	WP_079171959_1 (pp) OEV01037_1	91.96
4418	WP_079171959_1 (pp) WP_099881056_1	67.0	84.821	1	pp	WP_079171959_1 (pp) WP_099881056_1	84.82
4419	WP_079171959_1 (pp) WP_086575168_3	19.0	49.206	1	pp	WP_079171959_1 (pp) WP_086575168_3	47.69
4420	WP_111166051_7 (pp) WP_027760735_1	19.0	52.381	1	pp	WP_111166051_7 (pp) WP_027760735_1	50.77
4421	WP_111166051_7 (pp) WP_084211656_2	18.0	50.0	1	pp	WP_111166051_7 (pp) WP_084211656_2	46.15
4422	WP_111166051_7 (pp) OEV01037_1	19.0	52.381	1	pp	WP_111166051_7 (pp) OEV01037_1	50.77
4423	WP_111166051_7 (pp) WP_086575168_3	37.0	84.615	1	pp	WP_111166051_7 (pp) WP_086575168_3	84.61
4424	WP_099881056_1 (pp) WP_027760735_1	67.0	88.679	1	pp	WP_099881056_1 (pp) WP_027760735_1	83.19
4425	WP_099881056_1 (pp) WP_111166051_7	15.0	52.381	1	pp	WP_099881056_1 (pp) WP_111166051_7	50.77
4426	WP_099881056_1 (pp) OEV01037_1	67.0	88.679	1	pp	WP_099881056_1 (pp) OEV01037_1	83.19
4427	WP_099881056_1 (pp) WP_086575168_3	19.0	52.459	1	pp	WP_099881056_1 (pp) WP_086575168_3	49.23
4428	WP_114021280_1 (pp) WP_027760735_1	59.0	80.952	1	pp	WP_114021280_1 (pp) WP_027760735_1	76.58
4429	WP_114021280_1 (pp) WP_079171959_1	56.0	81.731	1	pp	WP_114021280_1 (pp) WP_079171959_1	76.58
4430	WP_114021280_1 (pp) WP_111166051_7	15.0	50.794	1	pp	WP_114021280_1 (pp) WP_111166051_7	49.23
4431	WP_114021280_1 (pp) WP_111035529_1	23.0	42.718	1	pp	WP_114021280_1 (pp) WP_111035529_1	42.72
4432	WP_114021280_1 (pp) WP_099881056_1	65.0	88.462	1	pp	WP_114021280_1 (pp) WP_099881056_1	82.88
4433	WP_114021280_1 (pp) OEV01037_1	59.0	80.952	1	pp	WP_114021280_1 (pp) OEV01037_1	76.58
4434	WP_114021280_1 (pp) WP_086575168_3	20.0	52.459	1	pp	WP_114021280_1 (pp) WP_086575168_3	49.23
4435	WP_027760735_1 (pp) WP_086575168_3	19.0	49.206	1	pp	WP_027760735_1 (pp) WP_086575168_3	47.69
4436	OEV01037_1 (pp) WP_027760735_1	80.0	100.0	1	pp	OEV01037_1 (pp) WP_027760735_1	100.0
4437	OEV01037_1 (pp) WP_086575168_3	19.0	49.206	1	pp	OEV01037_1 (pp) WP_086575168_3	47.69
4438	WP_111035529_1 (pp) WP_027760735_1	22.0	43.0	1	pp	WP_111035529_1 (pp) WP_027760735_1	41.75
4439	WP_111035529_1 (pp) OEV01037_1	22.0	43.0	1	pp	WP_111035529_1 (pp) OEV01037_1	41.75
4440	WP_111035529_1 (pp) WP_086575168_3	10.0	40.0	1	pp	WP_111035529_1 (pp) WP_086575168_3	40.0
4441	WP_043014356_2 (pp) AKS13949_1	47.0	98.485	1	pp	WP_043014356_2 (pp) AKS13949_1	98.48
4442	WP_043014356_2 (pp) AER69640_1	47.0	100.0	1	pp	WP_043014356_2 (pp) AER69640_1	100.0
4443	WP_043014356_2 (pp) WP_087454414_2	45.0	93.939	1	pp	WP_043014356_2 (pp) WP_087454414_2	93.94
4444	WP_043014356_2 (pp) AKP09252_2	47.0	98.485	1	pp	WP_043014356_2 (pp) AKP09252_2	98.48
4445	WP_043014356_2 (pp) ESU58068_2	45.0	93.939	1	pp	WP_043014356_2 (pp) ESU58068_2	93.94
4446	WP_043014356_2 (pp) AIG09585_2	47.0	98.485	1	pp	WP_043014356_2 (pp) AIG09585_2	98.48
4447	WP_043014356_2 (pp) WP_046096646_2	45.0	93.939	1	pp	WP_043014356_2 (pp) WP_046096646_2	93.94
4448	WP_043014356_2 (pp) WP_054468484_3	45.0	93.939	1	pp	WP_043014356_2 (pp) WP_054468484_3	93.94
4449	WP_043014356_2 (pp) WP_048589183_2	47.0	98.485	1	pp	WP_043014356_2 (pp) WP_048589183_2	98.48
4450	WP_043014356_2 (pp) WP_038620030_2	45.0	93.939	1	pp	WP_043014356_2 (pp) WP_038620030_2	93.94
4451	ESU58068_2 (pp) AKS13949_1	46.0	95.455	1	pp	ESU58068_2 (pp) AKS13949_1	95.46
4452	ESU58068_2 (pp) AER69640_1	45.0	93.939	1	pp	ESU58068_2 (pp) AER69640_1	93.94
4453	ESU58068_2 (pp) WP_087454414_2	46.0	96.97	1	pp	ESU58068_2 (pp) WP_087454414_2	96.97
4454	ESU58068_2 (pp) AKP09252_2	46.0	95.455	1	pp	ESU58068_2 (pp) AKP09252_2	95.46
4455	ESU58068_2 (pp) AIG09585_2	46.0	95.455	1	pp	ESU58068_2 (pp) AIG09585_2	95.46
4456	ESU58068_2 (pp) WP_046096646_2	48.0	100.0	1	pp	ESU58068_2 (pp) WP_046096646_2	100.0
4457	ESU58068_2 (pp) WP_054468484_3	48.0	100.0	1	pp	ESU58068_2 (pp) WP_054468484_3	100.0
4458	ESU58068_2 (pp) WP_038620030_2	48.0	100.0	1	pp	ESU58068_2 (pp) WP_038620030_2	100.0
4459	ESU58068_2 (pp) WP_048589183_2	46.0	95.455	1	pp	ESU58068_2 (pp) WP_048589183_2	95.46
4460	WP_046096646_2 (pp) AKS13949_1	46.0	95.455	1	pp	WP_046096646_2 (pp) AKS13949_1	95.46
4461	WP_046096646_2 (pp) AER69640_1	45.0	93.939	1	pp	WP_046096646_2 (pp) AER69640_1	93.94
4462	WP_046096646_2 (pp) WP_087454414_2	46.0	96.97	1	pp	WP_046096646_2 (pp) WP_087454414_2	96.97
4463	WP_046096646_2 (pp) AKP09252_2	46.0	95.455	1	pp	WP_046096646_2 (pp) AKP09252_2	95.46
4464	WP_046096646_2 (pp) WP_054468484_3	48.0	100.0	1	pp	WP_046096646_2 (pp) WP_054468484_3	100.0
4465	WP_046096646_2 (pp) WP_038620030_2	48.0	100.0	1	pp	WP_046096646_2 (pp) WP_038620030_2	100.0
4466	WP_046096646_2 (pp) WP_048589183_2	46.0	95.455	1	pp	WP_046096646_2 (pp) WP_048589183_2	95.46
4467	AIG09585_2 (pp) AKS13949_1	47.0	100.0	1	pp	AIG09585_2 (pp) AKS13949_1	100.0
4468	AIG09585_2 (pp) WP_087454414_2	46.0	95.455	1	pp	AIG09585_2 (pp) WP_087454414_2	95.46
4469	AIG09585_2 (pp) AER69640_1	47.0	98.485	1	pp	AIG09585_2 (pp) AER69640_1	98.48
4470	AIG09585_2 (pp) AKP09252_2	47.0	100.0	1	pp	AIG09585_2 (pp) AKP09252_2	100.0
4471	AIG09585_2 (pp) WP_046096646_2	46.0	95.455	1	pp	AIG09585_2 (pp) WP_046096646_2	95.46
4472	AIG09585_2 (pp) WP_054468484_3	46.0	95.455	1	pp	AIG09585_2 (pp) WP_054468484_3	95.46
4473	AIG09585_2 (pp) WP_048589183_2	47.0	100.0	1	pp	AIG09585_2 (pp) WP_048589183_2	100.0
4474	AIG09585_2 (pp) WP_038620030_2	46.0	95.455	1	pp	AIG09585_2 (pp) WP_038620030_2	95.46
4475	AKS13949_1 (pp) AKP09252_2	47.0	100.0	1	pp	AKS13949_1 (pp) AKP09252_2	100.0
4476	AER69640_1 (pp) AKS13949_1	47.0	98.485	1	pp	AER69640_1 (pp) AKS13949_1	98.48
4477	AER69640_1 (pp) WP_087454414_2	45.0	93.939	1	pp	AER69640_1 (pp) WP_087454414_2	93.94
4478	AER69640_1 (pp) AKP09252_2	47.0	98.485	1	pp	AER69640_1 (pp) AKP09252_2	98.48
4479	AER69640_1 (pp) WP_038620030_2	45.0	93.939	1	pp	AER69640_1 (pp) WP_038620030_2	93.94
4480	WP_087454414_2 (pp) AKS13949_1	46.0	95.455	1	pp	WP_087454414_2 (pp) AKS13949_1	95.46
4481	WP_087454414_2 (pp) AKP09252_2	46.0	95.455	1	pp	WP_087454414_2 (pp) AKP09252_2	95.46
4482	WP_038620030_2 (pp) AKS13949_1	46.0	95.455	1	pp	WP_038620030_2 (pp) AKS13949_1	95.46
4483	WP_038620030_2 (pp) WP_087454414_2	46.0	96.97	1	pp	WP_038620030_2 (pp) WP_087454414_2	96.97
4484	WP_038620030_2 (pp) AKP09252_2	46.0	95.455	1	pp	WP_038620030_2 (pp) AKP09252_2	95.46
4485	WP_048589183_2 (pp) AKS13949_1	47.0	100.0	1	pp	WP_048589183_2 (pp) AKS13949_1	100.0
4486	WP_048589183_2 (pp) WP_087454414_2	46.0	95.455	1	pp	WP_048589183_2 (pp) WP_087454414_2	95.46
4487	WP_048589183_2 (pp) AER69640_1	47.0	98.485	1	pp	WP_048589183_2 (pp) AER69640_1	98.48
4488	WP_048589183_2 (pp) AKP09252_2	47.0	100.0	1	pp	WP_048589183_2 (pp) AKP09252_2	100.0
4489	WP_048589183_2 (pp) WP_038620030_2	46.0	95.455	1	pp	WP_048589183_2 (pp) WP_038620030_2	95.46
4490	WP_054468484_3 (pp) AKS13949_1	46.0	95.455	1	pp	WP_054468484_3 (pp) AKS13949_1	95.46
4491	WP_054468484_3 (pp) AER69640_1	45.0	93.939	1	pp	WP_054468484_3 (pp) AER69640_1	93.94
4492	WP_054468484_3 (pp) WP_087454414_2	46.0	96.97	1	pp	WP_054468484_3 (pp) WP_087454414_2	96.97
4493	WP_054468484_3 (pp) AKP09252_2	46.0	95.455	1	pp	WP_054468484_3 (pp) AKP09252_2	95.46
4494	WP_054468484_3 (pp) WP_038620030_2	48.0	100.0	1	pp	WP_054468484_3 (pp) WP_038620030_2	100.0
4495	WP_054468484_3 (pp) WP_048589183_2	46.0	95.455	1	pp	WP_054468484_3 (pp) WP_048589183_2	95.46
4496	WP_036403339_1 (pp) WP_065136618_1	58.0	71.552	1	pp	WP_036403339_1 (pp) WP_065136618_1	71.55
4497	WP_036403339_1 (pp) WP_122442751_1	78.0	95.69	1	pp	WP_036403339_1 (pp) WP_122442751_1	95.69
4498	WP_036403339_1 (pp) WP_075510821_1	79.0	97.414	1	pp	WP_036403339_1 (pp) WP_075510821_1	97.41
4499	WP_036403339_1 (pp) ODR23958_1	58.0	71.552	1	pp	WP_036403339_1 (pp) ODR23958_1	71.55
4500	WP_036403339_1 (pp) WP_065164254_2	55.0	67.241	1	pp	WP_036403339_1 (pp) WP_065164254_2	67.24
4501	WP_036403339_1 (pp) ORC04413_1	77.0	94.828	1	pp	WP_036403339_1 (pp) ORC04413_1	94.83
4502	WP_036403339_1 (pp) WP_055578070_1	56.0	69.828	1	pp	WP_036403339_1 (pp) WP_055578070_1	69.83
4503	WP_036403339_1 (pp) WP_133437797_2	55.0	67.241	1	pp	WP_036403339_1 (pp) WP_133437797_2	67.24
4504	WP_036403339_1 (pp) WP_083271029_1	58.0	71.552	1	pp	WP_036403339_1 (pp) WP_083271029_1	71.55
4505	WP_036403339_1 (pp) RUP01435_1	48.0	67.327	1	pp	WP_036403339_1 (pp) RUP01435_1	58.62
4506	WP_083271029_1 (pp) WP_065136618_1	81.0	100.0	1	pp	WP_083271029_1 (pp) WP_065136618_1	100.0
4507	WP_083271029_1 (pp) WP_122442751_1	57.0	70.69	1	pp	WP_083271029_1 (pp) WP_122442751_1	70.69
4508	WP_083271029_1 (pp) ODR23958_1	81.0	100.0	1	pp	WP_083271029_1 (pp) ODR23958_1	100.0
4509	WP_083271029_1 (pp) WP_065164254_2	73.0	87.931	1	pp	WP_083271029_1 (pp) WP_065164254_2	87.93
4510	WP_083271029_1 (pp) WP_075510821_1	52.0	70.69	1	pp	WP_083271029_1 (pp) WP_075510821_1	70.69
4511	WP_083271029_1 (pp) WP_055578070_1	74.0	89.655	1	pp	WP_083271029_1 (pp) WP_055578070_1	89.66
4512	WP_083271029_1 (pp) WP_133437797_2	73.0	87.931	1	pp	WP_083271029_1 (pp) WP_133437797_2	87.93
4513	WP_083271029_1 (pp) ORC04413_1	56.0	70.69	1	pp	WP_083271029_1 (pp) ORC04413_1	70.69
4514	WP_083271029_1 (pp) RUP01435_1	66.0	90.099	1	pp	WP_083271029_1 (pp) RUP01435_1	78.45
4515	WP_055578070_1 (pp) WP_065136618_1	74.0	89.655	1	pp	WP_055578070_1 (pp) WP_065136618_1	89.66
4516	WP_055578070_1 (pp) WP_065164254_2	76.0	92.241	1	pp	WP_055578070_1 (pp) WP_065164254_2	92.24
4517	WP_055578070_1 (pp) ODR23958_1	74.0	89.655	1	pp	WP_055578070_1 (pp) ODR23958_1	89.66
4518	WP_055578070_1 (pp) WP_075510821_1	50.0	68.966	1	pp	WP_055578070_1 (pp) WP_075510821_1	68.97
4519	WP_055578070_1 (pp) WP_133437797_2	76.0	92.241	1	pp	WP_055578070_1 (pp) WP_133437797_2	92.24
4520	WP_055578070_1 (pp) ORC04413_1	54.0	68.103	1	pp	WP_055578070_1 (pp) ORC04413_1	68.1
4521	WP_055578070_1 (pp) RUP01435_1	67.0	93.069	1	pp	WP_055578070_1 (pp) RUP01435_1	81.03
4522	WP_122442751_1 (pp) WP_075510821_1	79.0	96.552	1	pp	WP_122442751_1 (pp) WP_075510821_1	96.55
4523	WP_122442751_1 (pp) ODR23958_1	57.0	70.69	1	pp	WP_122442751_1 (pp) ODR23958_1	70.69
4524	WP_122442751_1 (pp) WP_065136618_1	57.0	70.69	1	pp	WP_122442751_1 (pp) WP_065136618_1	70.69
4525	WP_122442751_1 (pp) WP_065164254_2	55.0	66.379	1	pp	WP_122442751_1 (pp) WP_065164254_2	66.38
4526	WP_122442751_1 (pp) ORC04413_1	77.0	93.966	1	pp	WP_122442751_1 (pp) ORC04413_1	93.97
4527	WP_122442751_1 (pp) WP_055578070_1	56.0	68.966	1	pp	WP_122442751_1 (pp) WP_055578070_1	68.97
4528	WP_122442751_1 (pp) WP_133437797_2	55.0	66.379	1	pp	WP_122442751_1 (pp) WP_133437797_2	66.38
4529	WP_122442751_1 (pp) RUP01435_1	49.0	68.317	1	pp	WP_122442751_1 (pp) RUP01435_1	59.48
4530	WP_065136618_1 (pp) WP_075510821_1	52.0	70.69	1	pp	WP_065136618_1 (pp) WP_075510821_1	70.69
4531	WP_065136618_1 (pp) ORC04413_1	56.0	70.69	1	pp	WP_065136618_1 (pp) ORC04413_1	70.69
4532	WP_065136618_1 (pp) RUP01435_1	66.0	90.099	1	pp	WP_065136618_1 (pp) RUP01435_1	78.45
4533	WP_065164254_2 (pp) WP_065136618_1	73.0	87.931	1	pp	WP_065164254_2 (pp) WP_065136618_1	87.93
4534	WP_065164254_2 (pp) WP_075510821_1	48.0	66.379	1	pp	WP_065164254_2 (pp) WP_075510821_1	66.38
4535	WP_065164254_2 (pp) WP_133437797_2	80.0	100.0	1	pp	WP_065164254_2 (pp) WP_133437797_2	100.0
4536	WP_065164254_2 (pp) ORC04413_1	53.0	65.517	1	pp	WP_065164254_2 (pp) ORC04413_1	65.52
4537	WP_065164254_2 (pp) RUP01435_1	64.0	90.099	1	pp	WP_065164254_2 (pp) RUP01435_1	78.45
4538	WP_133437797_2 (pp) WP_065136618_1	73.0	87.931	1	pp	WP_133437797_2 (pp) WP_065136618_1	87.93
4539	WP_133437797_2 (pp) WP_075510821_1	48.0	66.379	1	pp	WP_133437797_2 (pp) WP_075510821_1	66.38
4540	WP_133437797_2 (pp) ORC04413_1	53.0	65.517	1	pp	WP_133437797_2 (pp) ORC04413_1	65.52
4541	WP_133437797_2 (pp) RUP01435_1	64.0	90.099	1	pp	WP_133437797_2 (pp) RUP01435_1	78.45
4542	ORC04413_1 (pp) WP_075510821_1	72.0	95.69	1	pp	ORC04413_1 (pp) WP_075510821_1	95.69
4543	ORC04413_1 (pp) RUP01435_1	48.0	67.327	1	pp	ORC04413_1 (pp) RUP01435_1	58.62
4544	RUP01435_1 (pp) WP_075510821_1	49.0	68.103	1	pp	RUP01435_1 (pp) WP_075510821_1	68.1
4545	ODR23958_1 (pp) WP_065136618_1	81.0	100.0	1	pp	ODR23958_1 (pp) WP_065136618_1	100.0
4546	ODR23958_1 (pp) WP_065164254_2	73.0	87.931	1	pp	ODR23958_1 (pp) WP_065164254_2	87.93
4547	ODR23958_1 (pp) WP_075510821_1	52.0	70.69	1	pp	ODR23958_1 (pp) WP_075510821_1	70.69
4548	ODR23958_1 (pp) WP_133437797_2	73.0	87.931	1	pp	ODR23958_1 (pp) WP_133437797_2	87.93
[truncated: 25,245 more rows]
