# Supplementary material for: Discovery and characterisation of an amidine-containing ribosomally-synthesised peptide that is widely distributed in nature
Source: Royal Society of Chemistry journal article supplement (doi:10.1039/d1sc01456k), 2021-01-01
Supplement: d1sc01456k2.cys [file d1sc01456k2.cys › CytoscapeSession-2019_12_19-13_30/tables/36-cc_1.to.494.txt/SHARED_ATTRS-org.cytoscape.model.CyNode-36+shared+node.cytable]

"CyCSV-Version","1"
"SUID","Accession","canonicalName","cytoscape.alias.list","Genus","hdesc","hname","ID","Organism","PP_TE_Distance","PPSerial","Prodigalscore","SameStrand","Sequence","shared name","signif"
"java.lang.Long","java.lang.String","java.lang.String","java.util.List<java.lang.String>","java.lang.String","java.lang.String","java.lang.String","java.lang.String","java.lang.String","java.lang.Integer","java.lang.Integer","java.lang.Double","java.lang.String","java.lang.String","java.lang.String","java.lang.String"
"","mutable","mutable","mutable","mutable","mutable","mutable","mutable","mutable","mutable","mutable","mutable","mutable","mutable","","mutable"
"36 shared node",""
"62","WP_133246044","WP_133246044_2","WP_133246044_2","Ancrocorticia","none","none","WP_133246044_2","Ancrocorticia populi","943","2","3.47","no","MASGWANDECWNGYFTHLVESGKARRANNDEIRIDDLRYMFYLKYVGGTVILEIVG","WP_133246044_2","none"
"63","PWF27333","PWF27333_2","PWF27333_2","Ancrocorticia","none","none","PWF27333_2","Ancrocorticia populi","967","2","3.47","no","MASGWANDECWNGYFTHLVESGKARRANNDEIRIDDLRYMFYLKYVGGTVILEIVG","PWF27333_2","none"
"64","WP_066215709","WP_066215709_2","WP_066215709_2","Arthrobacter","Domain of unknown function (DUF4190)","PF13828.6","WP_066215709_2","Arthrobacter woluwensis","3931","2","23.33","no","MTQRQAGGTRNPATTRHTGKPTLALSSLLCCLLPPPTGLVLGVVALHRIDGPKGEGRALAVAGIVLSSVWAVLLIVLTAVHAFTTQDQVSPPLIGWG","WP_066215709_2","8.60E-17"
"65","SEC29390","SEC29390_2","SEC29390_2","Arthrobacter","Domain of unknown function (DUF4190)","PF13828.6","SEC29390_2","Arthrobacter woluwensis","3931","2","23.33","no","MTQRQAGGTRNPATTRHTGKPTLALSSLLCCLLPPPTGLVLGVVALHRIDGPKGEGRALAVAGIVLSSVWAVLLIVLTAVHAFTTQDQVSPPLIGWG","SEC29390_2","8.60E-17"
"66","PDQ36093","PDQ36093_4","PDQ36093_4","Candidatus","none","none","PDQ36093_4","Candidatus Lumbricidophila eiseniae","4543","4","15.25","yes","MNRDVALRLYLDKIETAIAAHPLASEPVLQSFEVIKRIGQENAELISEELEARGLPSLDELGKLQVRHGFSWARLHRKRKRLRNKLHLEI","PDQ36093_4","none"
"67","PDQ36095","PDQ36095_3","PDQ36095_3","Candidatus","none","none","PDQ36095_3","Candidatus Lumbricidophila eiseniae","6757","3","15.25","yes","MNRDVALRLYLDKIETAIAAHPLASEPVLQSFEVIKRIGQENAELISEELEARGLPSLDELGKLQVRHGFSWARLHRKRKRLRNKLHLEI","PDQ36095_3","none"
"68","WP_105032337","WP_105032337_3","WP_105032337_3","Arthrobacter","Helix-turn-helix domain","PF12840.7","WP_105032337_3","Arthrobacter ruber","4401","3","51.31","yes","MDRLFQALADATRRDIVARVLVAEYSVSGLAEQYDMSFAAVQKHVAVLERASLVTKEKRGREQIVRGEVEGVQRARRLLDDYERIWRQRVARIEDILAEDEDRN","WP_105032337_3","7.30E-12"
"69","WP_104181080","WP_104181080_3","WP_104181080_3","Arthrobacter","Helix-turn-helix domain","PF12840.7","WP_104181080_3","Arthrobacter sp. B0490","4339","3","56.19","yes","MYNHMVVDQIREDEVDRLFQALADATRRDIVARVLVAEYSVSGLAGQYDMSFAAVQKHVAVLERASLVTKEKRGREQIVRGEVDGVQKARRLLDDYERIWRQRVDRIGEILAQDEDRT","WP_104181080_3","4.90E-11"
"70","WP_107778338","WP_107778338_3","WP_107778338_3","Nocardioides","none","none","WP_107778338_3","Nocardioides sp. CF167","4093","3","7.41","yes","MSPHSSLTASVNSSSSPSTSSFFLIQSLTASEAFWILSASPDSVAALTSSSRPQYSLASSPSLVPQAVSENAAARTMLPRPRVVFFMGTPVLR","WP_107778338_3","none"
"71","WP_107778339","WP_107778339_3","WP_107778339_3","Nocardioides","none","none","WP_107778339_3","Nocardioides sp. CF167","2897","3","7.41","yes","MSPHSSLTASVNSSSSPSTSSFFLIQSLTASEAFWILSASPDSVAALTSSSRPQYSLASSPSLVPQAVSENAAARTMLPRPRVVFFMGTPVLR","WP_107778339_3","none"
"72","AGL26862","AGL26862_1","AGL26862_1","Mycobacterium","Aspartate/ornithine carbamoyltransferase, Asp/Orn","PF00185.24","AGL26862_1","Mycobacterium tuberculosis CAS/NITR204","4726","1","22.32","yes","MTGWPATVSHDFDAELPAADAVLMLRVQAERMNGGFFPSVREYSVRYGLTERRQAMLPGHAVVLHPGPMVRGMEITSSVADSSQSAVLQQVSNGVQVRMAVLFHVLVGAQDAGKEGAA","AGL26862_1","1.00E-19"
"73","COV81994","COV81994_2","COV81994_2","Mycobacterium","Aspartate/ornithine carbamoyltransferase, Asp/Orn","PF00185.24","COV81994_2","Mycobacterium tuberculosis","4955","2","21.56","yes","MLRVQAERMNGGFFPSVREYSVRYGLTERRQAMLPGHAVVLHPGPMVRGMEITSSVADSSQSAVLQQVSNGVQVRMAVLFHVLVGAQDAGKEGAA","COV81994_2","1.30E-17"
"74","WP_083091741","WP_083091741_1","WP_083091741_1","Rothia","none","none","WP_083091741_1","Rothia nasimurium","61","1","19.52","yes","MKSNLFGKHNTSAGATRQAGGYATRQAGGYATRQAGGYNAR","WP_083091741_1","none"
"75","WP_090039557","WP_090039557_6","WP_090039557_6","Leifsonia","none","none","WP_090039557_6","Leifsonia sp. CL147","56","6","7.59","yes","MINSDILDDVAAPQAATRQAGGYTTRQAGGYTTR","WP_090039557_6","none"
"76","WP_017177815","WP_017177815_2","WP_017177815_2","Actinomyces","Selenoprotein, putative","PF04328.13","WP_017177815_2","Actinomyces timonensis DSM 23838","6036","2","30.85","no","MTRALMGLPDGLRDGLRQARAMWRDFTGESGYDRYVARHRREHPDHEPMSEREYWRARRELAERSVETGCC","WP_017177815_2","1.20E-23"
"77","WP_073452776","WP_073452776_1","WP_073452776_1","Actinomyces","Selenoprotein, putative","PF04328.13","WP_073452776_1","Actinomyces denticolens","5365","1","39.28","no","MTRALTGLPDGLRDGLRQARAMWRDFTGESGYERYVARHRREHPDHEPMTEREYWRARRELAEQSIETSCC","WP_073452776_1","5.10E-23"
"78","REH37226","REH37226_1","REH37226_1","Kutzneria","Tetratricopeptide repeat","PF13374.6","REH37226_1","Kutzneria buriramensis","3582","1","46.29","no","MGTKQDVISRAEMCWGIPQSEHHRSEDAVALTEQAVAELKRRAEEDPGNAAHDQRLSWALINLAQLLSAQHEHARADAAALESVTIMRRMLAR","REH37226_1","0.033"
"79","WP_084580442","WP_084580442_1","WP_084580442_1","Kutzneria","Tetratricopeptide repeat","PF13374.6","WP_084580442_1","Kutzneria sp. 744","3465","1","44.53","no","MSGMDVIARAESCWGIPHGECREDDPVTITEQAVAALKERAAEEPDNADHAQKLSWALINLAQLLSARREHTRADQVALESVAIMRRMLAR","WP_084580442_1","2.00E-07"
"80","WP_131735418","WP_131735418_1","WP_131735418_1","Actinomadura","none","none","WP_131735418_1","Actinomadura sp. LMG 30035","413","1","59.5","yes","METAPQVMAGHLLSEVEPIHGTLDVLADRDAKQQLDRLVDYLMDPEPTEAFKTVGMSTQTHTGTDTGHSSTNTVPDADSDSEWQWDDE","WP_131735418_1","none"
"81","WP_103341360","WP_103341360_1","WP_103341360_1","Amycolatopsis","none","none","WP_103341360_1","Amycolatopsis sp. CA-126428","421","1","60.94","yes","MQFTPQVMAGHLLTEVEPIRGTLDVLADEEARQQLDRLVDYLVDPEPGEPFVAAGMSTQTNTETDTGPSNTNTIPDADSDTEWRWDDE","WP_103341360_1","none"
"82","WP_131785729","WP_131785729_4","WP_131785729_4","Frankia","PIN domain","PF01850.21","WP_131785729_4","Frankia symbiont of Coriaria ruscifolia","7457","4","14.55","no","MATAVVLVLAHLDRLDIDDAVRATAGTYPFPHLRSPDAIHLATADQLVASGKTISAFVTYDKRLAITAGEVGLVAAAPGQSVPK","WP_131785729_4","6.70E-09"
"83","WP_131785730","WP_131785730_4","WP_131785730_4","Frankia","PIN domain","PF01850.21","WP_131785730_4","Frankia symbiont of Coriaria ruscifolia","6110","4","14.55","no","MATAVVLVLAHLDRLDIDDAVRATAGTYPFPHLRSPDAIHLATADQLVASGKTISAFVTYDKRLAITAGEVGLVAAAPGQSVPK","WP_131785730_4","6.70E-09"
"84","WP_123601960","WP_123601960_4","WP_123601960_4","Micromonospora","none","none","WP_123601960_4","Micromonospora sp. Llam0","2589","4","11.23","no","MSPSGVRGLRPLERRVQQRVVLVQGRDDLLVLDRLERDRLVLYCFERDRVAHANLRCSAGEPSPSGSGDLLRRCRHNGFNAMVVASIRQC","WP_123601960_4","none"
"85","WP_123601959","WP_123601959_4","WP_123601959_4","Micromonospora","none","none","WP_123601959_4","Micromonospora sp. Llam0","3986","4","11.23","no","MSPSGVRGLRPLERRVQQRVVLVQGRDDLLVLDRLERDRLVLYCFERDRVAHANLRCSAGEPSPSGSGDLLRRCRHNGFNAMVVASIRQC","WP_123601959_4","none"
"86","WP_121183327","WP_121183327_1","WP_121183327_1","Nocardiopsis","none","none","WP_121183327_1","Nocardiopsis sp. Huas11","3418","1","19.24","no","MPKKKPRRRPERGKGANDIHRGPTRDPGSTGAVGCYIILVAVVAIGLMILLFELLG","WP_121183327_1","none"
"87","WP_053619387","WP_053619387_1","WP_053619387_1","Nocardiopsis","none","none","WP_053619387_1","Nocardiopsis sp. NRRL B-16309","2556","1","21.38","no","MPKKKPRRRPDRGKGANDIHRGPTRNPGSTGAVGCYVILVAVIGIGLLILLFELLD","WP_053619387_1","none"
"88","WP_095563712","WP_095563712_2","WP_095563712_2","Plantactinospora","none","none","WP_095563712_2","Plantactinospora sp. KBS50","4004","2","56.69","yes","MTDVFSPVDELRRHGLLGEDVPEATEQVLSALSEPQVDVFVKVKQRVDALESPDVQDQPVDDGSLALAMTRAMGWDRPKVEHSGGEIEGMSAPVAECACLCTGSGGGGGSN","WP_095563712_2","none"
"89","WP_095563712","WP_095563712_3","WP_095563712_3","Plantactinospora","Amidinotransferase","PF02274.17","WP_095563712_3","Plantactinospora sp. KBS50","3597","3","40.74","yes","MTATFDPATELRRHGLYGGAVAPATEEIIGTLTEPQVRAVIEISSPEVQAHDANGLALAMTRVMGWDRPQAQDTGSEVEGMSAPVAECACLCTGGGGGSGSS","WP_095563712_3","1.90E-07"
"90","WP_073785992","WP_073785992_3","WP_073785992_3","Streptomyces","none","none","WP_073785992_3","Streptomyces uncialis","4938","3","28.35","yes","MTEPRAEGSAEGPQEPAQAASDPASVARALLAAARLPAHEAEVAALVLAYPAQRAALDTLYGIGPAPRTDPAVRAAPSHVGREDR","WP_073785992_3","none"
"91","OKH95170","OKH95170_3","OKH95170_3","Streptomyces","none","none","OKH95170_3","Streptomyces uncialis","5061","3","28.35","yes","MTEPRAEGSAEGPQEPAQAASDPASVARALLAAARLPAHEAEVAALVLAYPAQRAALDTLYGIGPAPRTDPAVRAAPSHVGREDR","OKH95170_3","none"
"92","WP_126382827","WP_126382827_4","WP_126382827_4","Actinomyces","none","none","WP_126382827_4","Actinomyces howellii","1713","4","10.28","yes","MTRLLWLVATSLAASAKVCSKAMSLGLNSSQAARNFSALALSHTVLLRAESVSVWIEWLSSTSFFRVL","WP_126382827_4","none"
"93","WP_126382826","WP_126382826_3","WP_126382826_3","Actinomyces","none","none","WP_126382826_3","Actinomyces howellii","3137","3","10.28","yes","MTRLLWLVATSLAASAKVCSKAMSLGLNSSQAARNFSALALSHTVLLRAESVSVWIEWLSSTSFFRVL","WP_126382826_3","none"
"94","OKI12399","OKI12399_2","OKI12399_2","Nocardiopsis","none","none","OKI12399_2","Nocardiopsis sp. TSRI0078","1322","2","13.96","yes","MALAEGLLLLLGSAEAGPHTLPEHVGAGAAAHAAWLAATLRRCPVRPVGCWTDTVLAVPGGRFRVLHALALGPPPGTPLDIPKRLR","OKI12399_2","none"
"95","WP_083609312","WP_083609312_2","WP_083609312_2","Nocardiopsis","none","none","WP_083609312_2","Nocardiopsis sp. TSRI0078","1322","2","13.96","yes","MALAEGLLLLLGSAEAGPHTLPEHVGAGAAAHAAWLAATLRRCPVRPVGCWTDTVLAVPGGRFRVLHALALGPPPGTPLDIPKRLR","WP_083609312_2","none"
"96","WP_100045344","WP_100045344_3","WP_100045344_3","Streptomyces","none","none","WP_100045344_3","Streptomyces sp. Alain-F2R5","5971","3","1.44","yes","MPRNHSPIACVCHIAVNSRTEKV","WP_100045344_3","none"
"97","WP_121405200","WP_121405200_3","WP_121405200_3","Streptomyces","none","none","WP_121405200_3","Streptomyces sp. 57","5836","3","3.93","yes","MSRNHSLTACVCRIAVNTRTETP","WP_121405200_3","none"
"98","AXK36690","AXK36690_3","AXK36690_3","Streptomyces","none","none","AXK36690_3","Streptomyces armeniacus","7418","3","35.42","yes","MSTEPAEEPDGRGARIPRDPPDQQAGAAGETPDEELVPGGEEEDAELPDTDETGSGPRGTPQTEYEHPDRPEPYESTD","AXK36690_3","none"
"99","AXK36692","AXK36692_2","AXK36692_2","Streptomyces","none","none","AXK36692_2","Streptomyces armeniacus","3609","2","30.42","no","MSTEPAEEPDGRGARIPRDPPDQQAGAAGETPDEELVPGGEEEDAELPDTDETGSGPRGTPQTEYEHPDRPEPYESTD","AXK36692_2","none"
"100","WP_116026137","WP_116026137_1","WP_116026137_1","Actinomadura","none","none","WP_116026137_1","Actinomadura umbrina","7135","1","58.53","yes","MFRRTRPFWGGLWLVLSGWVMIDMADFPLGVVLQGGWSTSAAYILGGAQILFGLVAWSAPVHRRLAGFLGVCVALAALVGTNLGGFLIGTLLGILGGSMVWGWGPKKDRGRRARG","WP_116026137_1","none"
"101","WP_116026136","WP_116026136_1","WP_116026136_1","Actinomadura","none","none","WP_116026136_1","Actinomadura umbrina","5744","1","58.53","yes","MFRRTRPFWGGLWLVLSGWVMIDMADFPLGVVLQGGWSTSAAYILGGAQILFGLVAWSAPVHRRLAGFLGVCVALAALVGTNLGGFLIGTLLGILGGSMVWGWGPKKDRGRRARG","WP_116026136_1","none"
"102","PKV33869","PKV33869_5","PKV33869_5","Streptomyces","Cro/C1-type HTH DNA-binding domain","PF13443.6","PKV33869_5","Streptomyces sp. 59","3799","5","22.68","no","MKWNLRWVAARRDIWRPSDLKTAFEQVGFTPSLSKVCALWSATPVTVRLDDLDMICAALDCTVADLMEAEPVAAAESSEQEGQRAVGEGPRAGSGGRPVPKQTGGRGSVRRLPPN","PKV33869_5","1.80E-17"
"103","WP_111334328","WP_111334328_1","WP_111334328_1","Streptomyces","Cro/C1-type HTH DNA-binding domain","PF13443.6","WP_111334328_1","Streptomyces sp. AC1-42T","3954","1","22.49","yes","MVAAQRDLWRPTELLEAFKTVGFTPSLSKVAAMWSGTPVTVRLDDLDKICTVLNCTVGDLLQAEPLEAAAGESEALPKAVGAEGSDGGPVRPTPRRQGSRRTLPPN","WP_111334328_1","4.40E-18"
"104","WP_083113299","WP_083113299_2","WP_083113299_2","Mycobacterium","none","none","WP_083113299_2","Mycobacterium angelicum","4256","2","24.22","yes","MTTAIGAHDPVEKYAAYEHDDFISAVASINAFGCRGDTVLAEFKPRWRLTEEEVVRAAIIVISVSLMALIGLAAGAILTMG","WP_083113299_2","none"
"105","WP_085670625","WP_085670625_1","WP_085670625_1","Mycobacterium","none","none","WP_085670625_1","Mycobacterium szulgai","4668","1","20.75","yes","MTTAVGAYDPVEKYAAYEHDDFLSAVASINAFGCRGDTVLVESKPRWRPTEEEIVRAAITVISASLMVLIGLVAGAILTMG","WP_085670625_1","none"
"106","WP_081384789","WP_081384789_3","WP_081384789_3","Actinomyces","none","none","WP_081384789_3","Actinomyces oris","5783","3","0.47","no","MGQGEDGLIVAFDSSWRRDSSSPPSVKPPPHRVGAAGDGHHGSEHYYPMTHATFGQSCTRRELRTCPGRQKAALPVEECERNGRGDG","WP_081384789_3","none"
"107","WP_075410821","WP_075410821_2","WP_075410821_2","Actinomyces","none","none","WP_075410821_2","Actinomyces oris","258","2","0.47","no","MGQGEDGLIVAFDSSWRRDSSSPPSVKPPPHRVGAAGDGHHGSEHYYPMTHATFGQSCTRRELRTCPGRQKAALPVEECERNGRGDG","WP_075410821_2","none"
"108","WP_035849418","WP_035849418_4","WP_035849418_4","Cryptosporangium","none","none","WP_035849418_4","Cryptosporangium arvum DSM 44712","7714","4","13.92","yes","MAVVDVIGVVPVADRRVAAVRAVLVRMLGVDPVGHGLALVDVVFVDTMDVAVVRVVGVVLVRERGVAAGVAVLVVVLGVGLVGNGRGHARSSLRLRHSDISIY","WP_035849418_4","none"
"109","WP_035849420","WP_035849420_7","WP_035849420_7","Cryptosporangium","none","none","WP_035849420_7","Cryptosporangium arvum DSM 44712","6401","7","13.92","yes","MAVVDVIGVVPVADRRVAAVRAVLVRMLGVDPVGHGLALVDVVFVDTMDVAVVRVVGVVLVRERGVAAGVAVLVVVLGVGLVGNGRGHARSSLRLRHSDISIY","WP_035849420_7","none"
"110","WP_116154877","WP_116154877_3","WP_116154877_3","Streptomyces","none","none","WP_116154877_3","Streptomyces sp. 3212.4","4809","3","33.77","yes","MSDDNAAAELSGLGYLVPSPDVYRTLPVLDGFRRFELDTGAAAHYLRSRHWDAGILGRIPIPPPRGGYHGSGRVFSALNKTGEFRLWRTLWDCS","WP_116154877_3","none"
"111","RED74809","RED74809_3","RED74809_3","Streptomyces","none","none","RED74809_3","Streptomyces sp. 67","4809","3","33.77","yes","MSDDNAAAELSGLGYLVPSPDVYRTLPVLDGFRRFELDTGAAAHYLRSRHWDAGILGRIPIPPPRGGYHGSGRVFSALNKTGEFRLWRTLWDCS","RED74809_3","none"
"112","WP_018962008","WP_018962008_8","WP_018962008_8","Streptomyces","none","none","WP_018962008_8","Streptomyces sp. CNB091","5882","8","9.38","no","MLVWPSWRWTPMARLRRPAMTRGGWRVRMCEASSWKVRSRTWCGWFSMRQWPRIQAAGWLPV","WP_018962008_8","none"
"113","WP_018962008","WP_018962008_5","WP_018962008_5","Streptomyces","none","none","WP_018962008_5","Streptomyces sp. CNB091","5861","5","14.38","yes","MLVWPSWRWTPMARLRRPAMTRGGWRVRMCEASSWKVRSRTWCGWFSMRQWPRIQAAGWLPV","WP_018962008_5","none"
"114","WP_061921822","WP_061921822_1","WP_061921822_1","Streptomyces","none","none","WP_061921822_1","Streptomyces bungoensis","5830","1","0.43","yes","MWTPAVTGSRRRAGSDLDHTAGADRTADPGPYGDEREPAARCRRPGWVMDTSMGVLGDVGLCSALQTGAVTRAADATARRVAAQQVSTAQVA","WP_061921822_1","none"
"115","WP_065164254","WP_065164254_4","WP_065164254_4","Mycobacterium","none","none","WP_065164254_4","Mycobacterium gordonae","4","4","8.4","yes","MTLPESTSGRLGQQSLCSAVQVGVV","WP_065164254_4","none"
"116","RSM56874","RSM56874_1","RSM56874_1","Actinoplanes","none","none","RSM56874_1","Actinoplanes sp. ATCC 53533","17","1","38.36","yes","MPLTTDDEPRDPRICFHPGDAWLAGDAPDDPRVCFHPGDAWRGSLTETDERALAVLAKI","RSM56874_1","none"
"117","WP_125807935","WP_125807935_1","WP_125807935_1","Actinoplanes","none","none","WP_125807935_1","Actinoplanes sp. ATCC 53533","17","1","38.36","yes","MPLTTDDEPRDPRICFHPGDAWLAGDAPDDPRVCFHPGDAWRGSLTETDERALAVLAKI","WP_125807935_1","none"
"118","WP_111862862","WP_111862862_1","WP_111862862_1","Actinomadura","none","none","WP_111862862_1","Actinomadura sp. LHW63021","7507","1","22.52","yes","MSSLPSDKCNESIALCNADGVSWLTVLSRERRVPVKPGERVRPQDEVIYLAAGVADLVMGGMRSTVRRLPGLEAVREELRARGALALRRTGHLPHAHMEVIARRVVERNSDG","WP_111862862_1","none"
"119","WP_111862863","WP_111862863_1","WP_111862863_1","Actinomadura","none","none","WP_111862863_1","Actinomadura sp. LHW63021","6116","1","22.52","yes","MSSLPSDKCNESIALCNADGVSWLTVLSRERRVPVKPGERVRPQDEVIYLAAGVADLVMGGMRSTVRRLPGLEAVREELRARGALALRRTGHLPHAHMEVIARRVVERNSDG","WP_111862863_1","none"
"120","WP_086858376","WP_086858376_3","WP_086858376_3","Amycolatopsis","none","none","WP_086858376_3","Amycolatopsis lexingtonensis","3167","3","34.88","yes","MQEITKVIAASADAAVEAAGVLELQFDEHTAEALAFGGKTGV","WP_086858376_3","none"
"121","WP_086858376","WP_086858376_4","WP_086858376_4","Amycolatopsis","none","none","WP_086858376_4","Amycolatopsis lexingtonensis","85","4","34.21","yes","MPEITTVIAVSVDAALEAAGVEDLKLDEYTAKALAFGKTGA","WP_086858376_4","none"
"122","WP_060180042","WP_060180042_2","WP_060180042_2","Streptomyces","none","none","WP_060180042_2","Streptomyces sp. fd1-xmd","5831","2","39.02","yes","MSNTGNRYPSSKSLTMMTGLLALILMPVGAALDGTAQWVLIGAATVFIFICAYQMNANRRAGRG","WP_060180042_2","none"
"123","WP_076045700","WP_076045700_1","WP_076045700_1","Streptomyces","none","none","WP_076045700_1","Streptomyces amritsarensis","5830","1","39.02","yes","MSNTGNRYPSSKSLTMMTGLLALILMPVGAALDGTAQWVLIGAATVFIFICAYQMNANRRAGRG","WP_076045700_1","none"
"124","ERK54887","ERK54887_1","ERK54887_1","Propionibacterium","none","none","ERK54887_1","Propionibacterium acidifaciens F0233","4278","1","10.6","no","MKLFASATFSVQLADSVQYRSKRRLDVHAEVDPRTGEVRLFVDSKDLTEYLKNN","ERK54887_1","none"
"125","WP_081707409","WP_081707409_1","WP_081707409_1","Propionibacterium","none","none","WP_081707409_1","Propionibacterium acidifaciens","4278","1","10.6","no","MKLFASATFSVQLADSVQYRSKRRLDVHAEVDPRTGEVRLFVDSKDLTEYLKNN","WP_081707409_1","none"
"126","WP_104263679","WP_104263679_3","WP_104263679_3","Rathayibacter","none","none","WP_104263679_3","Rathayibacter iranicus","5128","3","20.6","yes","MNEKIPHGDTEAYKDASSGSDVDRSRKGRGITLVALAVSAVGLAVVRGGTAETWFDYCTTIILGILALVLLITGVRALRMRQRSR","WP_104263679_3","none"
"127","WP_097165202","WP_097165202_2","WP_097165202_2","Rathayibacter","none","none","WP_097165202_2","Rathayibacter rathayi","6072","2","27.69","yes","MGREMTRGNNGEGLDARGDSDASGSRKGHGITLVGLAVAAVGLLIVQGGRAVTWFDFATTAVIGVLALVLLLTGLRLLRAR","WP_097165202_2","none"
"128","EJJ05688","EJJ05688_1","EJJ05688_1","Streptomyces","Domain of unknown function (DUF4190)","PF13828.6","EJJ05688_1","Streptomyces auratus AGR0001","4851","1","65.28","yes","MTTLSQTARTTTPAPATAAETPQRPASRLRDHADGMAVASFILGLLGTLVLNLLLGPCALILGGLSLARGTNRRGRALLGIALGAVDLLLLALLTTTDGTVSWHIGG","EJJ05688_1","3.60E-11"
"129","WP_040899039","WP_040899039_1","WP_040899039_1","Streptomyces","Domain of unknown function (DUF4190)","PF13828.6","WP_040899039_1","Streptomyces auratus AGR0001","4668","1","65.28","yes","MTTLSQTARTTTPAPATAAETPQRPASRLRDHADGMAVASFILGLLGTLVLNLLLGPCALILGGLSLARGTNRRGRALLGIALGAVDLLLLALLTTTDGTVSWHIGG","WP_040899039_1","3.60E-11"
"130","SGI74060","SGI74060_3","SGI74060_3","Mycobacterium","none","none","SGI74060_3","Mycobacterium tuberculosis","862","3","2.07","yes","MLTIKEINISEITEVEEEVMESLLQAGCCCGGGTETGSWEPTKEGEK","SGI74060_3","none"
"131","WP_079180155","WP_079180155_3","WP_079180155_3","Mycobacterium","none","none","WP_079180155_3","Mycobacterium tuberculosis","829","3","2.07","yes","MLTIKEINISEITEVEEEVMESLLQAGCCCGGGTETGSWEPTKEGEK","WP_079180155_3","none"
"132","KJK44488","KJK44488_2","KJK44488_2","Lentzea","YjbR","PF04237.13","KJK44488_2","Lentzea aerocolonigenes","7513","2","49.96","no","MDRMPTWDEVVETAERLPEVEETTWYRTPSLRVAGKGFARLRTEAEGGLMLLCDLDEKAALLASGDPAFYTTPHYDGHGSILVDLEKVDPSQLTELIEEAWRIRAPARLK","KJK44488_2","5.10E-18"
"133","WP_082115066","WP_082115066_2","WP_082115066_2","Lentzea","YjbR","PF04237.13","WP_082115066_2","Lentzea aerocolonigenes","7426","2","49.96","no","MDRMPTWDEVVETAERLPEVEETTWYRTPSLRVAGKGFARLRTEAEGGLMLLCDLDEKAALLASGDPAFYTTPHYDGHGSILVDLEKVDPSQLTELIEEAWRIRAPARLK","WP_082115066_2","5.10E-18"
"134","WP_053729792","WP_053729792_4","WP_053729792_4","Streptomyces","none","none","WP_053729792_4","Streptomyces sp. WM6378","5005","4","10.97","yes","MDPQSYESQPHTDIHALRGAIEDACQQAVSGLFTLAGQLTR","WP_053729792_4","none"
"135","WP_053729790","WP_053729790_4","WP_053729790_4","Streptomyces","none","none","WP_053729790_4","Streptomyces sp. WM6378","7592","4","10.97","yes","MDPQSYESQPHTDIHALRGAIEDACQQAVSGLFTLAGQLTR","WP_053729790_4","none"
"136","OJV24806","OJV24806_2","OJV24806_2","Actinobacteria","none","none","OJV24806_2","Actinobacteria bacterium 69-20","5039","2","16.89","yes","MMRTLRSKFFVPAVLFSLATVSITFGDGGVRWMWRDKPWIAVLLGIVAAGMWILVFLRPGRLKTRS","OJV24806_2","none"
"137","OJV24808","OJV24808_1","OJV24808_1","Actinobacteria","none","none","OJV24808_1","Actinobacteria bacterium 69-20","2847","1","16.89","yes","MMRTLRSKFFVPAVLFSLATVSITFGDGGVRWMWRDKPWIAVLLGIVAAGMWILVFLRPGRLKTRS","OJV24808_1","none"
"138","RED74809","RED74809_2","RED74809_2","Streptomyces","none","none","RED74809_2","Streptomyces sp. 67","5254","2","38.54","yes","MDPVTVTAGCGVAASAFRLGYVWLSTWSDRRRIELEIRRAELECATLTEIISSLPPGSEVTEVLLDGRRVTIKLLPSKAT","RED74809_2","none"
"139","WP_116154877","WP_116154877_2","WP_116154877_2","Streptomyces","none","none","WP_116154877_2","Streptomyces sp. 3212.4","5254","2","38.54","yes","MDPVTVTAGCGVAASAFRLGYVWLSTWSDRRRIELEIRRAELECATLTEIISSLPPGSEVTEVLLDGRRVTIKLLPSKAT","WP_116154877_2","none"
"140","SFB39971","SFB39971_2","SFB39971_2","Amycolatopsis","none","none","SFB39971_2","Amycolatopsis marina","3574","2","4.09","yes","MTDGAVAASEKSTEVAPAAVSSSLSEIWAMSIIVSSILLRE","SFB39971_2","none"
"141","WP_091674323","WP_091674323_2","WP_091674323_2","Amycolatopsis","none","none","WP_091674323_2","Amycolatopsis marina","3463","2","4.09","yes","MTDGAVAASEKSTEVAPAAVSSSLSEIWAMSIIVSSILLRE","WP_091674323_2","none"
"142","WP_045196822","WP_045196822_3","WP_045196822_3","Rhodococcus","none","none","WP_045196822_3","Rhodococcus sp. B7740","1996","3","0.57","yes","MHGGESVAQRIELAVQLVERLLLSLRLVAVPHVAAGIADAQGFAGELLGVLDATRRGRDLGGQHVGEHPRLSRVRILCHVRPLSISRLDR","WP_045196822_3","none"
"143","KZE98020","KZE98020_3","KZE98020_3","Rhodococcus","none","none","KZE98020_3","Rhodococcus sp. EPR-147","2000","3","6.8","yes","MDGGKPVAQRIELAIQLVERLLLGLRFVAVPHMAAGIAYPQGLARQLLGLFDATRRGCDLGGQHVGEHPSLGRVRILCHVSPLSISRLDR","KZE98020_3","none"
"144","WP_067908345","WP_067908345_2","WP_067908345_2","Actinomadura","none","none","WP_067908345_2","Actinomadura viridilutea","4","2","16.11","yes","MRASDVPVRGPRRRGQAAPTGAGAAVRARGVIVRDVAEPPCVRTRRGPIGRIRGRDA","WP_067908345_2","none"
"145","AFJ68075","AFJ68075_2","AFJ68075_2","Streptomyces","none","none","AFJ68075_2","Streptomyces nobilis","1372","2","2.78","yes","GGPSVRDWADPPAIRSTHFGPLRLPS","AFJ68075_2","none"
"146","EWC60518","EWC60518_2","EWC60518_2","Actinokineospora","none","none","EWC60518_2","Actinokineospora spheciospongiae","25","2","36.98","yes","MPDIRELEARVLPHARLTAARLALLGDDDERLSTCEVLRGITGSADFRLVPDRTRGRAGSRGTVRAR","EWC60518_2","none"
"147","WP_054046275","WP_054046275_1","WP_054046275_1","Alloactinosynnema","none","none","WP_054046275_1","Alloactinosynnema sp. L-07","11","1","64.69","yes","MPDTRDLEARVIKLQRNTAALLSLLGGDDDEKLRFWEILKGITTPAEYKLVAHSLDVMQAQVDQVEFAARSIEATAKEMGRVRAG","WP_054046275_1","none"
"148","WP_116110588","WP_116110588_2","WP_116110588_2","Amycolatopsis","none","none","WP_116110588_2","Amycolatopsis ruanii","4202","2","9.38","yes","MARLVPIQEPPERELGFVPYRVPESFSEPLPDDELAAWEP","WP_116110588_2","none"
"149","WP_094002561","WP_094002561_2","WP_094002561_2","Amycolatopsis","none","none","WP_094002561_2","Amycolatopsis thermalba","4202","2","9.38","yes","MARLVPIQEPPERELGFVPYRVPESFSEPLPDDELAAWEP","WP_094002561_2","none"
"150","GAQ65395","GAQ65395_1","GAQ65395_1","Streptomyces","none","none","GAQ65395_1","Streptomyces scabiei","4834","1","62.11","no","MSITSVETAAWKTELAAMSGDVTDPAARAALESLSSALEPYFETPEYFRSILGKIASSMIDADTEEQITSRSFRDLAEFKAALPEGVVVTTV","GAQ65395_1","none"
"151","WP_059082757","WP_059082757_1","WP_059082757_1","Streptomyces","none","none","WP_059082757_1","Streptomyces scabiei","4834","1","62.11","no","MSITSVETAAWKTELAAMSGDVTDPAARAALESLSSALEPYFETPEYFRSILGKIASSMIDADTEEQITSRSFRDLAEFKAALPEGVVVTTV","WP_059082757_1","none"
"152","WP_091371144","WP_091371144_1","WP_091371144_1","Alloactinosynnema","none","none","WP_091371144_1","Alloactinosynnema album","2718","1","47.22","yes","MTFAGVPLWIPGLAALVPAIVFLFVYPHVAANGLRAWLLRWGHPLAWVLISAAAFVGYRFSGELAYYTALAGLTAFLGFFGAWSTATQAEG","WP_091371144_1","none"
"153","WP_054049769","WP_054049769_2","WP_054049769_2","Alloactinosynnema","none","none","WP_054049769_2","Alloactinosynnema sp. L-07","3220","2","23.97","yes","MTFAGVSLWLLGGAALVPAAVFLFIHPREDATGARAWLLRWAHPLGWVLLSAACFAGILISGTAAYYTALAGLASFLGFFGALSTGERKQVPPPV","WP_054049769_2","none"
"154","WP_053729790","WP_053729790_3","WP_053729790_3","Streptomyces","none","none","WP_053729790_3","Streptomyces sp. WM6378","4739","3","12.71","yes","MRLVVKRDRMYVATGLSAERSAPLPRGKAADQGVVSQRPWAVWSNPGAGGLGSGGLVGAVLAAAWRAGCFGLAQAMLVRDGIYTEQHTALTRRPFRPEPNDQDWVSMLIVTREDRS","WP_053729790_3","none"
"155","WP_053729792","WP_053729792_3","WP_053729792_3","Streptomyces","none","none","WP_053729792_3","Streptomyces sp. WM6378","7287","3","12.71","yes","MRLVVKRDRMYVATGLSAERSAPLPRGKAADQGVVSQRPWAVWSNPGAGGLGSGGLVGAVLAAAWRAGCFGLAQAMLVRDGIYTEQHTALTRRPFRPEPNDQDWVSMLIVTREDRS","WP_053729792_3","none"
"156","ONI75210","ONI75210_1","ONI75210_1","Actinosynnema","Glyoxalase/Bleomycin resistance protein/Dioxygena","PF00903.25","ONI75210_1","Actinosynnema sp. ALI-1.44","7700","1","66.0","yes","MDLYSIVPVSDCTRSLPWYEVFFGRPADEVIGEEYLWQVGANAWVVLDDRELRAKGVGTAMITLGVTDFDDIMARLAANDIAHDPVETYGNGVRHVDVPDPDGNVLSLAQGPTP","ONI75210_1","1.60E-05"
"157","WP_083753877","WP_083753877_1","WP_083753877_1","Actinosynnema","Glyoxalase/Bleomycin resistance protein/Dioxygena","PF00903.25","WP_083753877_1","Actinosynnema sp. ALI-1.44","7700","1","66.0","yes","MDLYSIVPVSDCTRSLPWYEVFFGRPADEVIGEEYLWQVGANAWVVLDDRELRAKGVGTAMITLGVTDFDDIMARLAANDIAHDPVETYGNGVRHVDVPDPDGNVLSLAQGPTP","WP_083753877_1","1.60E-05"
"158","WP_042407643","WP_042407643_3","WP_042407643_3","Streptacidiphilus","none","none","WP_042407643_3","Streptacidiphilus carbonis","5868","3","15.94","no","MKLIKRQPKTVKTNFAVMYGGKVAG","WP_042407643_3","none"
"159","WP_042407643","WP_042407643_4","WP_042407643_4","Streptacidiphilus","none","none","WP_042407643_4","Streptacidiphilus carbonis","5712","4","9.14","no","MKLIKRQPKTVKTNFAVMYGGKVAG","WP_042407643_4","none"
"160","WP_027737668","WP_027737668_1","WP_027737668_1","Streptomyces","none","none","WP_027737668_1","Streptomyces sp. CNT360","4020","1","38.38","no","MDMSSREIRIPLGEVVAVLRDLNEFVVSLDRLGSRQASGTADDRTVGAFIADWDVARRLARARHVISGALGAQLSEEDNAEIDALCEQGRFYGTDNAPPPSTGHSS","WP_027737668_1","none"
"161","WP_027737671","WP_027737671_1","WP_027737671_1","Streptomyces","none","none","WP_027737671_1","Streptomyces sp. CNT360","6820","1","43.38","yes","MDMSSREIRIPLGEVVAVLRDLNEFVVSLDRLGSRQASGTADDRTVGAFIADWDVARRLARARHVISGALGAQLSEEDNAEIDALCEQGRFYGTDNAPPPSTGHSS","WP_027737671_1","none"
"162","WP_086461444","WP_086461444_2","WP_086461444_2","Agreia","none","none","WP_086461444_2","Agreia sp. VKM Ac-1783","2021","2","2.64","no","MGECECAAVDEYLFERSGIRPQRRGVGAGGERPGEFCESLVGHDEALEALPRLGEAPLAGGDGVQVETGGEGTHRTRMISL","WP_086461444_2","none"
"163","WP_086461443","WP_086461443_2","WP_086461443_2","Agreia","none","none","WP_086461443_2","Agreia sp. VKM Ac-1783","3379","2","2.64","no","MGECECAAVDEYLFERSGIRPQRRGVGAGGERPGEFCESLVGHDEALEALPRLGEAPLAGGDGVQVETGGEGTHRTRMISL","WP_086461443_2","none"
"164","WP_083982727","WP_083982727_2","WP_083982727_2","Actinomadura","none","none","WP_083982727_2","Actinomadura hibisca NBRC 15177","4","2","36.38","no","MLGAAALLHLSAFQPVATADASSARPAKGTTYWTVPYGRLSAGVWEDKVTITFTKISGPALHVAVGYLDKSGDRRSPVFPAGSGPYDYSWGRRWDETGCVTAYLVLPTERIEHEACP","WP_083982727_2","none"
"165","WP_080564860","WP_080564860_3","WP_080564860_3","Cutibacterium","none","none","WP_080564860_3","Cutibacterium avidum","2857","3","4.7","no","MARDAVGEYLDRVGTSKYAGYLAGSGP","WP_080564860_3","none"
"166","WP_054213495","WP_054213495_2","WP_054213495_2","Actinobacteria","none","none","WP_054213495_2","Actinobacteria bacterium OK074","7501","2","20.92","no","MDQKTTADDVYRLALPQPEPTPVGDCHDCARLDRARTAVRITRDMSAVSDCNVLMRRHQAADHPDPSPPRP","WP_054213495_2","none"
"167","KPI20077","KPI20077_2","KPI20077_2","Actinobacteria","none","none","KPI20077_2","Actinobacteria bacterium OK074","7393","2","20.92","no","MDQKTTADDVYRLALPQPEPTPVGDCHDCARLDRARTAVRITRDMSAVSDCNVLMRRHQAADHPDPSPPRP","KPI20077_2","none"
"168","WP_018637157","WP_018637157_1","WP_018637157_1","Frankia","none","none","WP_018637157_1","Frankia elaeagni","117","1","94.92","yes","MAGIEDPKKFADTYLLMFNKLWANESEIARLRSNPRQYALDAGLPVEAGREVRIDETAMDGLYTTERLVQDWTGTEGVHVLHAPPAPTFDPAELTDVELDTVAAGAAAVVIIACYVDTK","WP_018637157_1","none"
"169","WP_054569301","WP_054569301_1","WP_054569301_1","Frankia","none","none","WP_054569301_1","Frankia sp. CcI49","71","1","92.68","yes","MAGIEDTKQFADTYLLMFNKLWANESEISRLRSNPRQYAVDAGLPVEAGREVRIDETPMDGLYTTERLVQDWVGTEGVHVLHAPAAPTFDPAELTDVELDTVAAGAAAVVVIACYVKTA","WP_054569301_1","none"
"170","WP_064110435","WP_064110435_3","WP_064110435_3","Leifsonia","Oxaloacetate decarboxylase, gamma chain","PF04277.13","WP_064110435_3","Leifsonia xyli","7765","3","52.0","yes","MTQNLQPTRRDRFLPVELLAISAGLAVFVGLIVLIATREFVLAGVGFGVTFIVALVLLALFALAFKPTEAEVEDIHEQDAEARAKAAQARPEGDDRPRGH","WP_064110435_3","0.019"
"171","WP_090039557","WP_090039557_3","WP_090039557_3","Leifsonia","none","none","WP_090039557_3","Leifsonia sp. CL147","7453","3","65.52","yes","MTSGDKKDPRVTQNLQPSRRDRFLPVELIGISAGLAVFVGLIVLVATREFVLAGVALGITFIVSLVLLALFALAFKPTEAEVEDIHEQDAEARAKAARQRAEGDDRPQGH","WP_090039557_3","none"
"172","EPJ34556","EPJ34556_2","EPJ34556_2","Streptomyces","none","none","EPJ34556_2","Streptomyces afghaniensis 772","3143","2","15.88","yes","MTSTFVADNEQTRRLEISSVITEMVEPAAMSCGMECVESEGTYPWP","EPJ34556_2","none"
"173","WP_082320087","WP_082320087_1","WP_082320087_1","Streptomyces","none","none","WP_082320087_1","Streptomyces afghaniensis 772","3056","1","15.88","yes","MTSTFVADNEQTRRLEISSVITEMVEPAAMSCGMECVESEGTYPWP","WP_082320087_1","none"
"174","KJK44488","KJK44488_1","KJK44488_1","Lentzea","Transglycosylase associated protein","PF04226.13","KJK44488_1","Lentzea aerocolonigenes","5890","1","62.41","yes","MTIESILGALIIGLILGFLGKLFAPGKQNIPIWLTLLVGIAAAFIGSWIARLLGVQDTPGIDWIEVIVQIVVAAIGVSVVAGMYGRKSVS","KJK44488_1","0.0093"
"175","WP_082115066","WP_082115066_1","WP_082115066_1","Lentzea","Transglycosylase associated protein","PF04226.13","WP_082115066_1","Lentzea aerocolonigenes","5890","1","62.41","yes","MTIESILGALIIGLILGFLGKLFAPGKQNIPIWLTLLVGIAAAFIGSWIARLLGVQDTPGIDWIEVIVQIVVAAIGVSVVAGMYGRKSVS","WP_082115066_1","0.0093"
"176","WP_089507734","WP_089507734_1","WP_089507734_1","Streptomyces","none","none","WP_089507734_1","Streptomyces sp. NBS 14/10","2691","1","32.16","no","MSATELTTPEAARWAARAGLPLPADRHAAVAAVADHIHSVVAVLRELDFGDTPPAATYHAGEEQHGAAV","WP_089507734_1","none"
"177","OXL32905","OXL32905_1","OXL32905_1","Streptomyces","none","none","OXL32905_1","Streptomyces sp. NBS 14/10","2691","1","32.16","no","MSATELTTPEAARWAARAGLPLPADRHAAVAAVADHIHSVVAVLRELDFGDTPPAATYHAGEEQHGAAV","OXL32905_1","none"
"178","KTR94659","KTR94659_1","KTR94659_1","Microbacterium","none","none","KTR94659_1","Microbacterium testaceum","1998","1","21.39","yes","MLTSAAVTATLVLALSGSPAAAPAPVPAAVSAVSVDAGSSAYLPLNFWCAFLRMCK","KTR94659_1","none"
"179","WP_081323045","WP_081323045_1","WP_081323045_1","Microbacterium","none","none","WP_081323045_1","Microbacterium testaceum","1983","1","21.39","yes","MLTSAAVTATLVLALSGSPAAAPAPVPAAVSAVSVDAGSSAYLPLNFWCAFLRMCK","WP_081323045_1","none"
"180","WP_078561279","WP_078561279_1","WP_078561279_1","Amycolatopsis","none","none","WP_078561279_1","Amycolatopsis sp. AA4","7604","1","43.65","no","MTSSKRAVYVVHDRTTSAQPGILATAYESVEKAIADLDGFRAQHPDDPGPLTWSTGPGWAAGRDAAGNTVFDVFGVSVAPDNEPAYFEKFNRRP","WP_078561279_1","none"
"181","EFL12569","EFL12569_1","EFL12569_1","Streptomyces","none","none","EFL12569_1","Streptomyces sp. AA4","7777","1","43.65","no","MTSSKRAVYVVHDRTTSAQPGILATAYESVEKAIADLDGFRAQHPDDPGPLTWSTGPGWAAGRDAAGNTVFDVFGVSVAPDNEPAYFEKFNRRP","EFL12569_1","none"
"182","WP_028567914","WP_028567914_2","WP_028567914_2","Salinispora","none","none","WP_028567914_2","Salinispora tropica CNT261","63","2","29.01","yes","MEQKRYEEFVETVQSANFDDKDTRSTAHTAAVFASDWDRVEKALDESNKREEA","WP_028567914_2","none"
"183","SFD04819","SFD04819_1","SFD04819_1","Verrucosispora","none","none","SFD04819_1","Verrucosispora sediminis","82","1","36.4","yes","MKSDQEFEEFVDAIQSANFDPRDTRATAHTAAVFASDWDRVEKAIQADKTDN","SFD04819_1","none"
"184","SDE31545","SDE31545_3","SDE31545_3","Streptomyces","none","none","SDE31545_3","Streptomyces sp. LaPpAH-199","7454","3","20.38","yes","MTSSEDETETVCRVCGFEGEVFWEGGWPNEAAICPCCDNEPDIGDASVMGLRNYRGYWVGHGAPWGSPSEERKHKREGWDLLKQMQNIPPQWR","SDE31545_3","none"
"185","WP_097276114","WP_097276114_3","WP_097276114_3","Streptomyces","none","none","WP_097276114_3","Streptomyces sp. TLI_55","5831","3","14.7","yes","MEGRVETVCRICGLDVGEVRFDGDGLSVFVVCACCGCESGVEDGTAAAVRRHRESWIGDGAPWFEPKARPADWDLELQLSNIPPEWR","WP_097276114_3","none"
"186","WP_124913393","WP_124913393_2","WP_124913393_2","Actinomyces","none","none","WP_124913393_2","Actinomyces hordeovulneris","2444","2","11.79","yes","MVGRDKTTDSNEILFEEVDVSAVPVFARLSYEETFER","WP_124913393_2","none"
"187","OKL50794","OKL50794_1","OKL50794_1","Actinomyces","none","none","OKL50794_1","Actinomyces hordeovulneris","2487","1","14.06","yes","MVGRDKTTDSNEILFEEVDVSAVPVFARLSYEETFER","OKL50794_1","none"
"188","SBT66104","SBT66104_1","SBT66104_1","Micromonospora","Phosphopantetheine attachment site","PF00550.25","SBT66104_1","Micromonospora sediminicola","6296","1","75.2","no","MPLMTLDDLRDILVECAGEDDSNDVSGDIADVPFEDLGYDSLALMETAARIEQRFGVRLPDEQVMDLETPKAVLDAVNTAAATA","SBT66104_1","5.20E-18"
"189","WP_098744376","WP_098744376_1","WP_098744376_1","Micromonospora","Phosphopantetheine attachment site","PF00550.25","WP_098744376_1","Micromonospora sp. WMMA1996","6095","1","70.5","no","MPLMTLDDLRDILVECAGEDDSNDVSGDIADVPFEDLGYDSLALMETAARIEQRFGVRLPDEQVMDLGTPKAVLDAVNTAAATA","WP_098744376_1","9.00E-18"
"190","WP_004017479","WP_004017479_2","WP_004017479_2","Mobiluncus","none","none","WP_004017479_2","Mobiluncus mulieris","62","2","11.16","yes","MLQLPHVVAVHDLHASTVSTGLPVLTAHVILEDECFHDGHTVEILGQIEDCLQHHHEISIYHTTIQLEPASRADFHNWKEQV","WP_004017479_2","none"
"191","EEZ91469","EEZ91469_3","EEZ91469_3","Mobiluncus","none","none","EEZ91469_3","Mobiluncus mulieris 28-1","958","3","10.29","yes","MLQLPHVVAVHDLHASTVSTGLPVLTAHVILEDECFHDGHTVEILGQIEDCLQHHHEISIYHTTIQLEPASRADFHNWKEQV","EEZ91469_3","none"
"192","WP_066216109","WP_066216109_1","WP_066216109_1","Arthrobacter","Domain of unknown function (DUF1737)","PF08410.10","WP_066216109_1","Arthrobacter woluwensis","7611","1","21.88","no","MAAPGVAPQDVTAEAPARLPYRLLTGPDTREFCERVSAALADGYILYGSPSVTFNGETVIAAQAVVLPYAPPAPPAPVVDPYAVPATGFAPYGGAL","WP_066216109_1","6.60E-25"
"193","WP_107004474","WP_107004474_2","WP_107004474_2","Arthrobacter","Domain of unknown function (DUF1737)","PF08410.10","WP_107004474_2","Arthrobacter woluwensis","7627","2","18.42","no","MPAVAPQDVTAEAPARLPYRLLTGPDTREFCERVSAALADGYILYGSPSVTFNGETVIAAQAVVLPYAPPAPPAPVVDPYAVPATGFAPYGGAL","WP_107004474_2","6.20E-25"
"194","WP_086513414","WP_086513414_2","WP_086513414_2","Clavibacter","none","none","WP_086513414_2","Clavibacter michiganensis","4538","2","25.08","yes","MQKTTAKGSTSLYVSVGGSAMLVGMSAMDDGGVEPVITIGSGVTRVLTVNESQAAGPTTAPTSTSSDGYYASADAATYGSAVAEWHPAVSSSEQANVVANACAIQPIVLLGPCP","WP_086513414_2","none"
"195","WP_086513413","WP_086513413_2","WP_086513413_2","Clavibacter","none","none","WP_086513413_2","Clavibacter michiganensis","5881","2","25.08","yes","MQKTTAKGSTSLYVSVGGSAMLVGMSAMDDGGVEPVITIGSGVTRVLTVNESQAAGPTTAPTSTSSDGYYASADAATYGSAVAEWHPAVSSSEQANVVANACAIQPIVLLGPCP","WP_086513413_2","none"
"196","WP_033342998","WP_033342998_1","WP_033342998_1","Catenuloplanes","none","none","WP_033342998_1","Catenuloplanes japonicus","68","1","32.37","yes","MGLHDAIYRAQKDKPELAETEQRILDELTERDRDSEVETVESAA","WP_033342998_1","none"
"197","WP_123603612","WP_123603612_3","WP_123603612_3","Micromonospora","none","none","WP_123603612_3","Micromonospora sp. Llam0","94","3","35.18","yes","MGLHDAIYRAQQDKPELAETEQLVLDELAERDQDSEVAAAESAG","WP_123603612_3","none"
"198","WP_045877303","WP_045877303_3","WP_045877303_3","Frankia","none","none","WP_045877303_3","Frankia sp. DC12","3613","3","24.87","yes","MIIPVAVVTGVAVAVVDVVDVVTVRDGDMSAAVAVDMLVRGVLGVPGGLAVVVVAVVGPVQAAVVGVVDMVTVGNRDVPAAGGMGVVGAAVMFAVGGGGHRSSWA","WP_045877303_3","none"
"199","WP_084011357","WP_084011357_3","WP_084011357_3","Frankia","none","none","WP_084011357_3","Frankia sp. DC12","5028","3","24.87","yes","MIIPVAVVTGVAVAVVDVVDVVTVRDGDMSAAVAVDMLVRGVLGVPGGLAVVVVAVVGPVQAAVVGVVDMVTVGNRDVPAAGGMGVVGAAVMFAVGGGGHRSSWA","WP_084011357_3","none"
"200","WP_131736173","WP_131736173_1","WP_131736173_1","Actinomadura","none","none","WP_131736173_1","Actinomadura sp. LMG 30035","1713","1","37.55","yes","MQDLDLDLDLQVEDVTQLSWEDLTKAMESKPERTSPCVGGCGTSYPPCANTKSSSMTNYCH","WP_131736173_1","none"
"201","WP_051751858","WP_051751858_2","WP_051751858_2","Streptosporangium","none","none","WP_051751858_2","Streptosporangium amethystogenes","161","2","18.82","yes","MSHADTSETLDLVAEDVTELSWEELTKEVVNYVSPCRGGCGTSLPSTISTNCR","WP_051751858_2","none"
"202","WP_092779820","WP_092779820_3","WP_092779820_3","Actinokineospora","Domain of unknown function (DUF397)","PF04149.12","WP_092779820_3","Actinokineospora terrae","5974","3","10.09","no","MNAVLPEWRKSSYSESDNCVELARWSGGNSVRDSKNPARKLEVSRRSVRRLLAFVRA","WP_092779820_3","2.30E-17"
"203","WP_121394015","WP_121394015_3","WP_121394015_3","Actinokineospora","Domain of unknown function (DUF397)","PF04149.12","WP_121394015_3","Actinokineospora cianjurensis","7223","3","11.0","no","MNAVLPEWRKSSYSESDNCVELARWSGGNSVRDSKNPARKLEVSRRSVRRLLAFVRA","WP_121394015_3","2.30E-17"
"204","WP_123971014","WP_123971014_1","WP_123971014_1","Streptomyces","Phosphopantetheine attachment site","PF00550.25","WP_123971014_1","Streptomyces sp. TLI_185","5389","1","45.19","no","MAQRPWNARFETILRQGLPGLGKDRAPAVDVPMEAYGLDSMGLISIVSSLESAYCVSLAGQVTVPVRTLTAGDLWGIVSASLQSTWDTSRPSPAGRTTLGQAPWIMA","WP_123971014_1","6.40E-08"
"205","RPF24868","RPF24868_1","RPF24868_1","Streptomyces","Phosphopantetheine attachment site","PF00550.25","RPF24868_1","Streptomyces sp. TLI_185","5455","1","45.19","no","MAQRPWNARFETILRQGLPGLGKDRAPAVDVPMEAYGLDSMGLISIVSSLESAYCVSLAGQVTVPVRTLTAGDLWGIVSASLQSTWDTSRPSPAGRTTLGQAPWIMA","RPF24868_1","6.40E-08"
"206","KKF03247","KKF03247_1","KKF03247_1","Mycolicibacterium","none","none","KKF03247_1","Mycolicibacterium obuense","177","1","17.5","yes","MGITRTERVVRPVVVVTVATPGDKDYEADFFAPLADSSARSSSATQL","KKF03247_1","none"
"207","WP_064282747","WP_064282747_1","WP_064282747_1","Mycolicibacterium","none","none","WP_064282747_1","Mycolicibacterium iranicum","18","1","17.5","yes","MGITRTERVVRPVVVVTVATPGDKDYEADFFAPLADSSARSSSATQL","WP_064282747_1","none"
"208","WP_073387576","WP_073387576_3","WP_073387576_3","Jatrophihabitans","Ribosomal protein L36","PF00444.18","WP_073387576_3","Jatrophihabitans endophyticus","3066","3","6.41","no","MKVKPSVKPICDKCKVIRRNGRVMVICENLRHKQRQG","WP_073387576_3","2.60E-22"
"209","WP_081907113","WP_081907113_2","WP_081907113_2","Kitasatospora","Ribosomal protein L36","PF00444.18","WP_081907113_2","Kitasatospora arboriphila","2041","2","1.74","yes","MKVRASLKSLKNQPGSQVVRRRGKIFVINKGNPRFKARQG","WP_081907113_2","2.70E-21"
"210","WP_035861760","WP_035861760_3","WP_035861760_3","Cryptosporangium","none","none","WP_035861760_3","Cryptosporangium arvum DSM 44712","56","3","19.96","yes","MFTKTDETLTAVTPELLQELLVNGEGAATDDALEGGFVPICVQPPSARR","WP_035861760_3","none"
"211","EXG81129","EXG81129_3","EXG81129_3","Cryptosporangium","none","none","EXG81129_3","Cryptosporangium arvum DSM 44712","4","3","19.96","yes","MFTKTDETLTAVTPELLQELLVNGEGAATDDALEGGFVPICVQPPSARR","EXG81129_3","none"
"212","OKH95170","OKH95170_1","OKH95170_1","Streptomyces","Phosphopantetheine attachment site","PF00550.25","OKH95170_1","Streptomyces uncialis","3859","1","54.99","no","MVSNTDILHAVADIVHEVAGVDPAEVTAEKSFTDDLGVDSLSMVEITVAVEDRFEVRIPDDQVAELRTVGGVVNYIDGHR","OKH95170_1","2.70E-21"
"213","WP_073785992","WP_073785992_1","WP_073785992_1","Streptomyces","Phosphopantetheine attachment site","PF00550.25","WP_073785992_1","Streptomyces uncialis","3859","1","54.99","no","MVSNTDILHAVADIVHEVAGVDPAEVTAEKSFTDDLGVDSLSMVEITVAVEDRFEVRIPDDQVAELRTVGGVVNYIDGHR","WP_073785992_1","2.70E-21"
"214","SBN62121","SBN62121_1","SBN62121_1","Curtobacterium","Protein of unknown function DUF86","PF01934.17","SBN62121_1","Curtobacterium sp. 9128","7473","1","38.6","yes","MNRDVPERLDDVIRACGVIDRYVSDTSLPEDLVYDAVRMRLVEIGEAVRMLPVAVTAGEPGIPWSRVSLLGERLTRRYFDTTPAIVLGTARVDVPHLCEAARRLRARHG","SBN62121_1","2.40E-11"
"215","WP_111209344","WP_111209344_2","WP_111209344_2","Curtobacterium","none","none","WP_111209344_2","Curtobacterium sp. MCSS17_015","3474","2","31.6","yes","MSGSTEQRLDDLIAACTRIEEYIADPAVPEAVVLDAVRMRLVDIASSARQLPPTMTAAEPTIPWSQVSALGERLTGRHGETPASLLLRTARTDVPVLRDAAIRMRARCPGPGR","WP_111209344_2","none"
"216","CAM04239","CAM04239_1","CAM04239_1","Saccharopolyspora","none","none","CAM04239_1","Saccharopolyspora erythraea NRRL 2338","6925","1","28.33","yes","MGKETVVTEQPPLNPREVRVALMVEILHTYQARNLARARNDTATARQAQHHLAVLLDQLATARTTNPVGAHRVDRPR","CAM04239_1","none"
"217","WP_009951067","WP_009951067_1","WP_009951067_1","Saccharopolyspora","none","none","WP_009951067_1","Saccharopolyspora erythraea NRRL 2338","6799","1","28.33","yes","MGKETVVTEQPPLNPREVRVALMVEILHTYQARNLARARNDTATARQAQHHLAVLLDQLATARTTNPVGAHRVDRPR","WP_009951067_1","none"
"218","WP_090014707","WP_090014707_1","WP_090014707_1","Lentzea","Protein of unknown function (DUF3040)","PF11239.8","WP_090014707_1","Lentzea violacea","6418","1","51.33","yes","MELPDREKQALHDIERRLMEEDPKLAAKLNRAAPRVHVSRGIQVVIGMLAVYVAGLIAVMVGVTLSSVVLIVLGGCVIVGMFAVFAVRVWRRRRD","WP_090014707_1","2.30E-21"
"219","SDN00667","SDN00667_1","SDN00667_1","Lentzea","Protein of unknown function (DUF3040)","PF11239.8","SDN00667_1","Lentzea violacea","6418","1","51.33","yes","MELPDREKQALHDIERRLMEEDPKLAAKLNRAAPRVHVSRGIQVVIGMLAVYVAGLIAVMVGVTLSSVVLIVLGGCVIVGMFAVFAVRVWRRRRD","SDN00667_1","2.30E-21"
"220","WP_101557149","WP_101557149_2","WP_101557149_2","Brevibacterium","none","none","WP_101557149_2","Brevibacterium aurantiacum","3027","2","13.07","yes","MNNNLTPVKSEPDTWEVGSNTGAPTTIRPAEVTEDPADFMEGGSGCGCSGGSSLVIIF","WP_101557149_2","none"
"221","WP_101557151","WP_101557151_2","WP_101557151_2","Brevibacterium","none","none","WP_101557151_2","Brevibacterium aurantiacum","922","2","13.07","yes","MNNNLTPVKSEPDTWEVGSNTGAPTTIRPAEVTEDPADFMEGGSGCGCSGGSSLVIIF","WP_101557151_2","none"
"222","WP_082163142","WP_082163142_2","WP_082163142_2","Kytococcus","none","none","WP_082163142_2","Kytococcus sedentarius","1183","2","28.92","yes","MPSYRTVMTITTVLPGRHPEEVERRARSVTRLEAWDIAIVSAQPRVTARFTASDEEEARAIHERILRAAAEVADVPHSRLAAVVAGRSRYLTPWASRDS","WP_082163142_2","none"
"223","EFF80328","EFF80328_2","EFF80328_2","Schaalia","none","none","EFF80328_2","Schaalia odontolytica F0309","1187","2","27.65","yes","MPSYRTIMTVTTLAPGRAPEEIEAAARSVTRLESWDIAIASGQPRVTARFTATDDTEARAIHGEIAAAVRLVADVPRARLAAVVRGRSHYLAP","EFF80328_2","none"
"224","AKJ11412","AKJ11412_3","AKJ11412_3","Streptomyces","none","none","AKJ11412_3","Streptomyces incarnatus","7441","3","0.85","no","MEILASVAVSRDFLLGPGTKPSAIGFHTHALAKDDET","AKJ11412_3","none"
"225","AKJ11407","AKJ11407_3","AKJ11407_3","Streptomyces","none","none","AKJ11407_3","Streptomyces incarnatus","1340","3","0.85","no","MEILASVAVSRDFLLGPGTKPSAIGFHTHALAKDDET","AKJ11407_3","none"
"226","WP_124799873","WP_124799873_2","WP_124799873_2","Nakamurella","Protein of unknown function (DUF1490)","PF07371.12","WP_124799873_2","Nakamurella sp. s14-144","2922","2","24.52","no","MFIGILARQAAHAAITGVVGVAIVNAVKGSGGRNVVKKAAVGVAELGLRSARVAEAGAENVRLAAADVMAEAKQRVGGEVKAPGVHTGNDHQH","WP_124799873_2","2.20E-27"
"227","WP_094931980","WP_094931980_1","WP_094931980_1","Pseudonocardia","Protein of unknown function (DUF1490)","PF07371.12","WP_094931980_1","Pseudonocardia sp. MH-G8","3497","1","49.65","no","MVFGAFVGKAASSLATGIAGAAVYDGVKKVVGSNVLRGSAVAVTALGLRGARAAETGAEKARLVTADIVAEAREKIGEQVPAPGAPVEHGHDH","WP_094931980_1","1.80E-33"
"228","WP_121191582","WP_121191582_2","WP_121191582_2","Motilibacter","none","none","WP_121191582_2","Motilibacter peucedani","6279","2","4.2","no","MAPGALELGGGGGERLGGRVREVGTRTVPVRVLVRTARERVEGERAQAVDHPPGLDLEVVGGALGVHGRRSCRTLRA","WP_121191582_2","none"
"229","RKS80725","RKS80725_2","RKS80725_2","Motilibacter","none","none","RKS80725_2","Motilibacter peucedani","6279","2","4.2","no","MAPGALELGGGGGERLGGRVREVGTRTVPVRVLVRTARERVEGERAQAVDHPPGLDLEVVGGALGVHGRRSCRTLRA","RKS80725_2","none"
"230","WP_100806338","WP_100806338_1","WP_100806338_1","Streptomyces","MerR HTH family regulatory protein","PF13411.6","WP_100806338_1","Streptomyces sp. M56","7310","1","54.49","yes","MTAGESFDRLDDDDYPAYTMGRAAEMLGTTQGFLRAVGEARLITPLRSEGGHRRYSRYQLRIAARARELVDQGTPIEAACRIVILEDQLEEAQRINAEYRRAAASENPTTAG","WP_100806338_1","1.10E-12"
"231","WP_049566251","WP_049566251_1","WP_049566251_1","Streptomyces","MerR HTH family regulatory protein","PF13411.6","WP_049566251_1","Streptomyces sp. SBT349","5480","1","56.93","no","MTADNPRNRLDDDDYPAYTMGRAAEILGTTPAFLRAIGEARLITPLRSEGGHRRYSRYQLRIAARARELVDQGTSVEAACRIVILEDQLEEARRINEELRRHATEPRPKVDA","WP_049566251_1","1.50E-12"
"232","SDE51953","SDE51953_3","SDE51953_3","Glycomyces","none","none","SDE51953_3","Glycomyces harbinensis","3105","3","31.05","yes","MTTTGTPTNTNTNTTVRLAGATMHRNHTHHHTHCHCHCHCHCHTTIGQVVW","SDE51953_3","none"
"233","WP_091040567","WP_091040567_4","WP_091040567_4","Glycomyces","none","none","WP_091040567_4","Glycomyces harbinensis","3099","4","31.05","yes","MTTTGTPTNTNTNTTVRLAGATMHRNHTHHHTHCHCHCHCHCHTTIGQVVW","WP_091040567_4","none"
"234","WP_117355837","WP_117355837_2","WP_117355837_2","Actinomadura","Variant erythrocyte surface antigen-1","PF12785.7","WP_117355837_2","Actinomadura sp. NEAU-G17","6200","2","13.22","yes","MTIPRRSASVRRTMNDLRYTALPTGCSVVPSSGGGTYECKCPGSTVTCQSNQNCTCDFAGARCV","WP_117355837_2","2.70E-07"
"235","WP_122198059","WP_122198059_2","WP_122198059_2","Actinomadura","none","none","WP_122198059_2","Actinomadura sp. NEAU-Ht49","6107","2","7.69","yes","MTIPIRSASVQRAMNGLRYAAVVPGCDRAGVVPSTSGPGTIRCNCPGGGTADCPPGTHCACDMLGAHCPPDEPGQ","WP_122198059_2","none"
"236","WP_100521517","WP_100521517_2","WP_100521517_2","Mycobacteroides","none","none","WP_100521517_2","Mycobacteroides abscessus subsp. abscessus","2556","2","14.18","no","MTNKAERAPWHYEKLATERTITARGLDECDVVGCSNFVDIVLETSNHDRFCTACIDAADTITDAETAPPNWWKVTGPPEYQLKKNSVAFTVRLITRKPLWPGYPSVFSDQHQ","WP_100521517_2","none"
"237","WP_079611677","WP_079611677_2","WP_079611677_2","Mycobacteroides","none","none","WP_079611677_2","Mycobacteroides abscessus subsp. bolletii","2545","2","13.61","no","MTNKAEWAPWHYEKLATERTITARGLDECDVVGCFNFVDVVLETSNHDRFCTACIDAAGTITDAEIVPPNWWKVTGPPEYQLKKNSVAFPVRLITRKPLWPAIRVSSATNPCEE","WP_079611677_2","none"
"238","SFO39709","SFO39709_1","SFO39709_1","Actinomadura","Acetyltransferase (GNAT) domain","PF13673.7","SFO39709_1","Actinomadura madurae","3922","1","49.45","yes","MSPASPHFCFVADADGGPVGFVTGMVGPIGLFENRAGRIEDLFVLPAHRRRGLATELVDAAVAELGRRGVVVYNVEVPHDWRAGLAFWRRRRHWKQDAVVFSRYD","SFO39709_1","6.20E-11"
"239","WP_083597719","WP_083597719_1","WP_083597719_1","Actinomadura","Acetyltransferase (GNAT) domain","PF13673.7","WP_083597719_1","Actinomadura madurae","3625","1","49.45","yes","MSPASPHFCFVADADGGPVGFVTGMVGPIGLFENRAGRIEDLFVLPAHRRRGLATELVDAAVAELGRRGVVVYNVEVPHDWRAGLAFWRRRRHWKQDAVVFSRYD","WP_083597719_1","6.20E-11"
"240","GCB48186","GCB48186_1","GCB48186_1","Streptomyces","none","none","GCB48186_1","Streptomyces sp. NL15-2K","74","1","27.79","yes","MEQEFVYAVVEDVTEESTAPECVSDIWQCY","GCB48186_1","none"
"241","WP_124441159","WP_124441159_1","WP_124441159_1","Streptomyces","none","none","WP_124441159_1","Streptomyces sp. NL15-2K","74","1","27.79","yes","MEQEFVYAVVEDVTEESTAPECVSDIWQCY","WP_124441159_1","none"
"242","EWM17971","EWM17971_1","EWM17971_1","Kutzneria","none","none","EWM17971_1","Kutzneria sp. 744","884","1","17.41","yes","MAIWFCVWAAAYVAADPGRDAGPEVRDRLGLWTVLEIDLADGYSTI","EWM17971_1","none"
"243","WP_084580442","WP_084580442_2","WP_084580442_2","Kutzneria","none","none","WP_084580442_2","Kutzneria sp. 744","884","2","17.41","yes","MAIWFCVWAAAYVAADPGRDAGPEVRDRLGLWTVLEIDLADGYSTI","WP_084580442_2","none"
"244","EJJ05688","EJJ05688_2","EJJ05688_2","Streptomyces","Protein of unknown function (DUF4229)","PF14012.6","EJJ05688_2","Streptomyces auratus AGR0001","5171","2","32.07","yes","MLFLVAALLLMGIMLGTAAHLPLPVTLVAAAVIAGWLLVFFLRERRHQDEVTSR","EJJ05688_2","2.60E-07"
"245","WP_040899039","WP_040899039_2","WP_040899039_2","Streptomyces","Protein of unknown function (DUF4229)","PF14012.6","WP_040899039_2","Streptomyces auratus AGR0001","4988","2","32.07","yes","MLFLVAALLLMGIMLGTAAHLPLPVTLVAAAVIAGWLLVFFLRERRHQDEVTSR","WP_040899039_2","2.60E-07"
"246","WP_126382827","WP_126382827_1","WP_126382827_1","Actinomyces","Proteins of 100 residues with WXG","PF06013.12","WP_126382827_1","Actinomyces howellii","1661","1","93.68","no","MSNVQADLDSLRQLYNTLKNDVELSHSIQTDTDSALSNTVWESANAEKFRAAWDEFKPKLIAFEQTFADAASDVATNHNNLVIANGEDDEHLPPVTAIA","WP_126382827_1","1.50E-07"
"247","WP_126382826","WP_126382826_1","WP_126382826_1","Actinomyces","Proteins of 100 residues with WXG","PF06013.12","WP_126382826_1","Actinomyces howellii","3085","1","93.68","no","MSNVQADLDSLRQLYNTLKNDVELSHSIQTDTDSALSNTVWESANAEKFRAAWDEFKPKLIAFEQTFADAASDVATNHNNLVIANGEDDEHLPPVTAIA","WP_126382826_1","1.50E-07"
"248","EWM18075","EWM18075_2","EWM18075_2","Kutzneria","none","none","EWM18075_2","Kutzneria sp. 744","71","2","34.13","yes","MGFLKDLYGHNAEELVLPAHEQQVIAELVKAENQAASAPEE","EWM18075_2","none"
"249","WP_052396081","WP_052396081_2","WP_052396081_2","Kutzneria","none","none","WP_052396081_2","Kutzneria sp. 744","4","2","34.13","yes","MGFLKDLYGHNAEELVLPAHEQQVIAELVKAENQAASAPEE","WP_052396081_2","none"
"250","WP_082275447","WP_082275447_3","WP_082275447_3","Mycobacterium","none","none","WP_082275447_3","Mycobacterium persicum","7169","3","9.21","no","MSTRRAGLLTWRAGLLTWRAGMLTWRAGMLTRRAAAPRPGPDILRRVRKRRAGVGGSYRATQRACRQRHANGAENTGRYDTDLRHSEHLSRLAETSLTTTLRASTLKRP","WP_082275447_3","none"
"251","ORC04864","ORC04864_2","ORC04864_2","Mycobacterium","none","none","ORC04864_2","Mycobacterium persicum","7169","2","9.21","no","MSTRRAGLLTWRAGLLTWRAGMLTWRAGMLTRRAAAPRPGPDILRRVRKRRAGVGGSYRATQRACRQRHANGAENTGRYDTDLRHSEHLSRLAETSLTTTLRASTLKRP","ORC04864_2","none"
"252","WP_122819575","WP_122819575_2","WP_122819575_2","Varibaculum","none","none","WP_122819575_2","Varibaculum vaginae","6977","2","3.67","yes","MEGKKSAYQGNGTIGALSHKFV","WP_122819575_2","none"
"253","WP_071129084","WP_071129084_3","WP_071129084_3","Varibaculum","none","none","WP_071129084_3","Varibaculum sp. Marseille-P2802","6976","3","7.84","yes","MEGEKSAYQGYCFASMLGHKDLVAVPRKLVEKINPKRVAVKLVVGGF","WP_071129084_3","none"
"254","WP_052396081","WP_052396081_1","WP_052396081_1","Kutzneria","Tetrahydrofolate dehydrogenase/cyclohydrolase, NA","PF02882.19","WP_052396081_1","Kutzneria sp. 744","4182","1","65.41","no","MDLHGRRALVTGGTGSIGRAIAARLAGAGATVVITGRDERRGEEVIAGIRANGGKVDFARADLASGGPAVRELADRAGDIDILVNNAAANIHGAIIPVDGGLTAV","WP_052396081_1","2.80E-05"
"255","EWM18075","EWM18075_1","EWM18075_1","Kutzneria","Tetrahydrofolate dehydrogenase/cyclohydrolase, NA","PF02882.19","EWM18075_1","Kutzneria sp. 744","4182","1","65.41","no","MDLHGRRALVTGGTGSIGRAIAARLAGAGATVVITGRDERRGEEVIAGIRANGGKVDFARADLASGGPAVRELADRAGDIDILVNNAAANIHGAIIPVDGGLTAV","EWM18075_1","2.80E-05"
"256","WP_097276114","WP_097276114_1","WP_097276114_1","Streptomyces","none","none","WP_097276114_1","Streptomyces sp. TLI_55","2341","1","28.86","yes","MSKRQVWAVIALVTVSAWSAVMAVFGQTAAVAAVVPSVILMVEQVGVALAGGESRRTRTASGAASEVPAAEGGDEERAE","WP_097276114_1","none"
"257","WP_059190156","WP_059190156_1","WP_059190156_1","Streptomyces","none","none","WP_059190156_1","Streptomyces antibioticus","2339","1","28.82","yes","MSKRQVWAVIALVTVSAWSAVMAVFGQTTAVAAVVPSVILMVEQVGVALAGGESRRTRTDSGAAREVPAAEGGDEERAG","WP_059190156_1","none"
"258","ONF71727","ONF71727_1","ONF71727_1","Amycolatopsis","none","none","ONF71727_1","Amycolatopsis keratiniphila subsp. keratiniphila","1655","1","40.91","no","MINRTARVALGVAAALVFGGTGVANAATEADNYQCGDHRYRDNTAKICWSWQDSGKGDGTFDGRYIVASYTGRPSFWVSLDGKPDMFDPRVGHVYRQKRTVQFRICNIACSDWKQ","ONF71727_1","none"
"259","WP_083715654","WP_083715654_1","WP_083715654_1","Amycolatopsis","none","none","WP_083715654_1","Amycolatopsis keratiniphila","1645","1","40.91","no","MINRTARVALGVAAALVFGGTGVANAATEADNYQCGDHRYRDNTAKICWSWQDSGKGDGTFDGRYIVASYTGRPSFWVSLDGKPDMFDPRVGHVYRQKRTVQFRICNIACSDWKQ","WP_083715654_1","none"
"260","WP_030172139","WP_030172139_1","WP_030172139_1","Spirillospora","none","none","WP_030172139_1","Spirillospora albida","3414","1","19.55","yes","MTVDERTPGASGTTDETALFERDGSRIVPRDRARGPWRRDALHGGAVAALLASAVDVPASAPPSSTTRPDAWANPPRP","WP_030172139_1","none"
"261","WP_030172142","WP_030172142_1","WP_030172142_1","Spirillospora","none","none","WP_030172142_1","Spirillospora albida","4631","1","19.55","yes","MTVDERTPGASGTTDETALFERDGSRIVPRDRARGPWRRDALHGGAVAALLASAVDVPASAPPSSTTRPDAWANPPRP","WP_030172142_1","none"
"262","WP_121394015","WP_121394015_2","WP_121394015_2","Actinokineospora","none","none","WP_121394015_2","Actinokineospora cianjurensis","1740","2","17.44","yes","MTATPEQVDTARAIVLLAAKLDTLPTRLRDYASGLIIGWASPEQADALADALEETARQIRLNRPRFVLTME","WP_121394015_2","none"
"263","WP_092779820","WP_092779820_2","WP_092779820_2","Actinokineospora","none","none","WP_092779820_2","Actinokineospora terrae","493","2","16.85","yes","MTATPEQVDTARAIVLLAAKLDTLPTRLRDYASGLIIGWASPEQADALADALEETARQIRLNRPRFVLTME","WP_092779820_2","none"
"264","WP_067908345","WP_067908345_1","WP_067908345_1","Actinomadura","Preprotein translocase SecG subunit","PF03840.14","WP_067908345_1","Actinomadura viridilutea","7402","1","54.51","yes","MIIATSIVLAITSVLMVILVLMHKGKGGGLSDMFGGGISSSLGGSSVVERNLDRLTIGVGLVWVASIVVLGLLFKSKGVG","WP_067908345_1","2.20E-22"
"265","WP_092533827","WP_092533827_1","WP_092533827_1","Yuhushiella","Preprotein translocase SecG subunit","PF03840.14","WP_092533827_1","Yuhushiella deserti","7756","1","47.53","no","MKLFLQILLIASSVLLIGAVLLHRGRGGGLSSLFGGGMQSSLAGSSVAEKNLDRITLLLGAIWLISIVGLGLLLKV","WP_092533827_1","1.60E-22"
"266",,"WP_079054543_2","",,,,,,,,,,,"WP_079054543_2",
"267",,"WP_086861034_2","",,,,,,,,,,,"WP_086861034_2",
"268","SDY68794","SDY68794_2","SDY68794_2","Geodermatophilus","GrpB protein","PF04229.14","SDY68794_2","Geodermatophilus africanus","5742","2","29.31","yes","MVPPPVDDEYLDHVVVGPRDTTPRHVVLVDPDPDWPRQYAEHEARIRAALGPAVRRVEHIGSTSVPGCGPSRGSTSS","SDY68794_2","5.80E-16"
"269","WP_091159224","WP_091159224_2","WP_091159224_2","Geodermatophilus","GrpB protein","PF04229.14","WP_091159224_2","Geodermatophilus africanus","5778","2","29.31","yes","MVPPPVDDEYLDHVVVGPRDTTPRHVVLVDPDPDWPRQYAEHEARIRAALGPAVRRVEHIGSTSVPGCGPSRGSTSS","WP_091159224_2","5.80E-16"
"270","WP_126898321","WP_126898321_1","WP_126898321_1","Streptomyces","Protein of unknown function (DUF952)","PF06108.12","WP_126898321_1","Streptomyces sp. WAC 01325","6543","1","46.32","no","MPEDTHILHITERSLWEAARERGTYEMSTRGRTLQEEGFIHCSTRAQLPSVAAFLYGSYDGPDDLVVLVVDPTRLEAPLRYEAPKPGGEEFPHVYGPIPVPAVVDVEVWR","WP_126898321_1","1.80E-30"
"271","SEC38602","SEC38602_1","SEC38602_1","Streptomyces","Protein of unknown function (DUF952)","PF06108.12","SEC38602_1","Streptomyces sp. KS_5","6567","1","45.78","no","MPEDTRILHITERSLWEAARERGTYEMSTRGRTLQEEGFIHCSTRTQLPSVAAFLYGSYDGPDELVVLIVDPARLEAPLRYEAPKPGGEEFPHVYGPIPVAAVVDVEVWK","SEC38602_1","2.70E-30"
"272","WP_083019015","WP_083019015_3","WP_083019015_3","Mycobacteroides","none","none","WP_083019015_3","Mycobacteroides saopaulense","100","3","5.29","yes","MGGIVFGNVNLPREAIAKLGPAEQKALEGLAQKLTPEERNAFDAVAKLEK","WP_083019015_3","none"
"273","SIK72068","SIK72068_5","SIK72068_5","Mycobacteroides","none","none","SIK72068_5","Mycobacteroides abscessus subsp. abscessus","103","5","8.45","yes","MGGIVFGNVNLPREAIAKLGPAEQKALEGLAQKLTPEERNAFDAVAKLEK","SIK72068_5","none"
"274","WP_123601960","WP_123601960_3","WP_123601960_3","Micromonospora","none","none","WP_123601960_3","Micromonospora sp. Llam0","6884","3","21.57","no","MKAGLGNLAVDGVDHLAAIIRNRLKRIQYRPELIPGFLAQTGLTLEPEPP","WP_123601960_3","none"
"275","WP_123601959","WP_123601959_3","WP_123601959_3","Micromonospora","none","none","WP_123601959_3","Micromonospora sp. Llam0","5499","3","21.57","no","MKAGLGNLAVDGVDHLAAIIRNRLKRIQYRPELIPGFLAQTGLTLEPEPP","WP_123601959_3","none"
"276","SFN21853","SFN21853_3","SFN21853_3","Actinomadura","none","none","SFN21853_3","Actinomadura madurae","76","3","19.46","yes","MFTLNIPEGAELLDELGEVDDNRPVCLMTFNYCPVTD","SFN21853_3","none"
"277","WP_083597223","WP_083597223_2","WP_083597223_2","Actinomadura","none","none","WP_083597223_2","Actinomadura madurae","7","2","19.46","yes","MFTLNIPEGAELLDELGEVDDNRPVCLMTFNYCPVTD","WP_083597223_2","none"
"278","SCD31130","SCD31130_3","SCD31130_3","Streptomyces","none","none","SCD31130_3","Streptomyces sp. di50b","5705","3","17.56","yes","MLRNIISSPSRLVAAVLGLLLMALSVVFLGGVVRGAAFGAGVGIMIGIMAKARSQAATSGAERT","SCD31130_3","none"
"279","WP_093544729","WP_093544729_3","WP_093544729_3","Streptomyces","none","none","WP_093544729_3","Streptomyces sp. di188","5675","3","17.56","yes","MLRNIISSPSRLVAAVLGLLLMALSVVFLGGVVRGAAFGAGVGIMIGIMAKARSQAATSGAERT","WP_093544729_3","none"
"280","PDQ36095","PDQ36095_5","PDQ36095_5","Candidatus","none","none","PDQ36095_5","Candidatus Lumbricidophila eiseniae","4553","5","7.77","yes","MDTYFADPCAAWQRGTNEHHNARNRHYLPIRTDFRTTTEEELQEIITGINNQPRKYLGWATPAEIYQQHTQLHDHSVALQT","PDQ36095_5","none"
"281","PDQ36093","PDQ36093_6","PDQ36093_6","Candidatus","none","none","PDQ36093_6","Candidatus Lumbricidophila eiseniae","2339","6","7.77","yes","MDTYFADPCAAWQRGTNEHHNARNRHYLPIRTDFRTTTEEELQEIITGINNQPRKYLGWATPAEIYQQHTQLHDHSVALQT","PDQ36093_6","none"
"282","WP_084692314","WP_084692314_5","WP_084692314_5","Frankia","Bacterial regulatory proteins, gntR family","PF00392.21","WP_084692314_5","Frankia elaeagni","4363","5","8.42","no","MSENLDPDSGVPLYRQIAARLMEDIDSGVFKPGDKIPTETELSRHYGVSTATIRSAMGILQLGGVVVRRQGVGTFVARPAQPADVAPDDDPMQC","WP_084692314_5","2.20E-24"
"283","WP_084692311","WP_084692311_7","WP_084692311_7","Frankia","Bacterial regulatory proteins, gntR family","PF00392.21","WP_084692311_7","Frankia elaeagni","762","7","8.42","no","MSENLDPDSGVPLYRQIAARLMEDIDSGVFKPGDKIPTETELSRHYGVSTATIRSAMGILQLGGVVVRRQGVGTFVARPAQPADVAPDDDPMQC","WP_084692311_7","2.20E-24"
"284","OKI46856","OKI46856_2","OKI46856_2","Streptomyces","none","none","OKI46856_2","Streptomyces sp. TSRI0281","6288","2","14.89","yes","MRAVLRAEVLWVETLTGLRMDRFTKLVKAVRERGGNGPGEGRP","OKI46856_2","none"
"285","WP_079182634","WP_079182634_2","WP_079182634_2","Streptomyces","none","none","WP_079182634_2","Streptomyces sp. TSRI0281","6288","2","14.89","yes","MRAVLRAEVLWVETLTGLRMDRFTKLVKAVRERGGNGPGEGRP","WP_079182634_2","none"
"286","WP_120571833","WP_120571833_2","WP_120571833_2","Micromonospora","none","none","WP_120571833_2","Micromonospora tulbaghiae","4248","2","3.53","no","MVGSDDGDGVEPAAVGMDSRVHGSVVESPHGVQADGCGGEWSGDRVGEVEAVERAGDTPVAARVGGEHRCH","WP_120571833_2","none"
"287","WP_120571834","WP_120571834_2","WP_120571834_2","Micromonospora","none","none","WP_120571834_2","Micromonospora tulbaghiae","5573","2","3.53","no","MVGSDDGDGVEPAAVGMDSRVHGSVVESPHGVQADGCGGEWSGDRVGEVEAVERAGDTPVAARVGGEHRCH","WP_120571834_2","none"
"288","WP_030288747","WP_030288747_1","WP_030288747_1","Streptomyces","Short C-terminal domain","PF09851.9","WP_030288747_1","Streptomyces viridifaciens","7276","1","54.89","no","MYTQLADWHGPGAWILLVPLFWIAVVVLVITMLRRSVWRRYGACGFGTGFGAGAPGVVEHPLAVLGRRFAEGDIDAEEYRAKRAVLTEPTKDVPGGGGAR","WP_030288747_1","1.70E-10"
"289","OJH69022","OJH69022_1","OJH69022_1","Streptomyces","Short C-terminal domain","PF09851.9","OJH69022_1","Streptomyces viridifaciens","7333","1","54.89","no","MYTQLADWHGPGAWILLVPLFWIAVVVLVITMLRRSVWRRYGACGFGTGFGAGAPGVVEHPLAVLGRRFAEGDIDAEEYRAKRAVLTEPTKDVPGGGGAR","OJH69022_1","1.70E-10"
"290","WP_053729790","WP_053729790_1","WP_053729790_1","Streptomyces","none","none","WP_053729790_1","Streptomyces sp. WM6378","7720","1","34.96","yes","MLLLTLNQAESFLETGEAEVAMRFPDEPDQYLYRAVLAERMLQRLVTSVRDVMNSSPKDCVGQSQP","WP_053729790_1","none"
"291","WP_053729792","WP_053729792_1","WP_053729792_1","Streptomyces","none","none","WP_053729792_1","Streptomyces sp. WM6378","5133","1","34.96","yes","MLLLTLNQAESFLETGEAEVAMRFPDEPDQYLYRAVLAERMLQRLVTSVRDVMNSSPKDCVGQSQP","WP_053729792_1","none"
"292","WP_037658204","WP_037658204_2","WP_037658204_2","Streptomyces","none","none","WP_037658204_2","Streptomyces aurantiacus JA 4570","3721","2","5.43","no","MSESESDSGATQERTDFASFMAAMRESDPIWQERVVTAFTSSVSTRDWALLTDEGRTQN","WP_037658204_2","none"
"293","WP_058846818","WP_058846818_2","WP_058846818_2","Streptomyces","none","none","WP_058846818_2","Streptomyces silvensis","3586","2","4.91","no","MSESESDSGATQERTDFASFMAAMRESDPIWQERVVTAFTSSVSTRDWALLTDEGRTQN","WP_058846818_2","none"
"294","KOG82578","KOG82578_7","KOG82578_7","Streptomyces","none","none","KOG82578_7","Streptomyces griseus subsp. rhodochrous","7324","7","9.03","no","MTHNGGVPFQHAAPTEDDATVRGYLAATTGPVAAVPRTDTRLPVTWARSEPMPTAAWSAFHRLRESWSRAARSSSTEAASRTVGPGWSSRTKPASP","KOG82578_7","none"
"295","WP_083191919","WP_083191919_6","WP_083191919_6","Streptomyces","none","none","WP_083191919_6","Streptomyces violaceoruber","7336","6","8.12","no","MTHNGGVPFQHAAPTEDDATVRGYLAATTGPVAALPRTDTRLPVTWARSEPMPTAAWSAFHRLRESWSRAARSSSTEAASRTVGPGWSSRTKPASP","WP_083191919_6","none"
"296","WP_090014707","WP_090014707_3","WP_090014707_3","Lentzea","none","none","WP_090014707_3","Lentzea violacea","2258","3","10.18","yes","MFMCISGLFTVDHGPCYGAEADQRGEVHLNDNVDFSKFLTALQDFRRDDAVARPTAHTSSVNTRDWERVEKALVAGNGKL","WP_090014707_3","none"
"297","SDN00667","SDN00667_3","SDN00667_3","Lentzea","none","none","SDN00667_3","Lentzea violacea","2300","3","10.18","yes","MFMCISGLFTVDHGPCYGAEADQRGEVHLNDNVDFSKFLTALQDFRRDDAVARPTAHTSSVNTRDWERVEKALVAGNGKL","SDN00667_3","none"
"298","WP_084692314","WP_084692314_3","WP_084692314_3","Frankia","none","none","WP_084692314_3","Frankia elaeagni","2296","3","16.4","yes","MNEKPHWEEPRADVLEVEQIEESADMETAFASFCSDLTLDL","WP_084692314_3","none"
"299","WP_084692311","WP_084692311_5","WP_084692311_5","Frankia","none","none","WP_084692311_5","Frankia elaeagni","5879","5","16.4","yes","MNEKPHWEEPRADVLEVEQIEESADMETAFASFCSDLTLDL","WP_084692311_5","none"
"300","PDQ36095","PDQ36095_1","PDQ36095_1","Candidatus","none","none","PDQ36095_1","Candidatus Lumbricidophila eiseniae","7271","1","17.52","yes","MGIDMSKRNTGNLFFSAGGSIALTATFASPAYAIEANDSSSDAVDAVALSVERFRDIDPDRVAVPAASAQSTALGVQSL","PDQ36095_1","none"
"301","PDQ36093","PDQ36093_2","PDQ36093_2","Candidatus","none","none","PDQ36093_2","Candidatus Lumbricidophila eiseniae","5057","2","17.52","yes","MGIDMSKRNTGNLFFSAGGSIALTATFASPAYAIEANDSSSDAVDAVALSVERFRDIDPDRVAVPAASAQSTALGVQSL","PDQ36093_2","none"
"302","WP_082128669","WP_082128669_1","WP_082128669_1","Dermacoccus","none","none","WP_082128669_1","Dermacoccus sp. PE3","6689","1","21.19","no","MPVGVASPQEPGQGTVRPSTLVEGETRITDIVWDEWGAENITARGTIDGRRVTLRLVAAPCAGRDRYVALTYGTSAEFDKGGTTTLRMCEDPPSTPGSPTSTDSPTT","WP_082128669_1","none"
"303","KLO64220","KLO64220_3","KLO64220_3","Dermacoccus","none","none","KLO64220_3","Dermacoccus sp. PE3","6827","3","21.19","no","MPVGVASPQEPGQGTVRPSTLVEGETRITDIVWDEWGAENITARGTIDGRRVTLRLVAAPCAGRDRYVALTYGTSAEFDKGGTTTLRMCEDPPSTPGSPTSTDSPTT","KLO64220_3","none"
"304","WP_080754833","WP_080754833_2","WP_080754833_2","Clavibacter","none","none","WP_080754833_2","Clavibacter michiganensis","4285","2","31.91","no","MQARPNDVDRLWALLEEDHRERGASAEDPHADPVDAAVAARPDDAPADALPVLEARRDRVVALVSDPARPVLIAYSGIRAVGFALMDRNGVGGRAFTAAGWRGLGVEEEIRAAAPLLLR","WP_080754833_2","none"
"305","WP_052129072","WP_052129072_2","WP_052129072_2","Clavibacter","none","none","WP_052129072_2","Clavibacter michiganensis","2909","2","31.91","no","MQARPNDVDRLWALLEEDHRERGASAEDPHADPVDAAVAARPDDAPADALPVLEARRDRVVALVSDPARPVLIAYSGIRAVGFALMDRNGVGGRAFTAAGWRGLGVEEEIRAAAPLLLR","WP_052129072_2","none"
"306","WP_067823333","WP_067823333_3","WP_067823333_3","Nocardia","none","none","WP_067823333_3","Nocardia inohanensis NBRC 100128","3285","3","27.11","no","MSIPVSDAEPIRRKAAALRGLAIALVVAGVPVGACLSFGGAVAFLYLWGMDDWEGQRSVGPWLAAGISMSGFVLALASAMLGVYIWLLAGGGPARRGRTDEP","WP_067823333_3","none"
"307","WP_084523472","WP_084523472_2","WP_084523472_2","Nocardia","none","none","WP_084523472_2","Nocardia inohanensis NBRC 100128","1954","2","27.11","no","MSIPVSDAEPIRRKAAALRGLAIALVVAGVPVGACLSFGGAVAFLYLWGMDDWEGQRSVGPWLAAGISMSGFVLALASAMLGVYIWLLAGGGPARRGRTDEP","WP_084523472_2","none"
"308","KPI20077","KPI20077_1","KPI20077_1","Actinobacteria","none","none","KPI20077_1","Actinobacteria bacterium OK074","6648","1","26.16","no","MAETTHPPNASNTPDFRTWCAWHQGYSDTTRAVRAIEQASGPGYVLYACKGCRTINHLTLLAEQP","KPI20077_1","none"
"309","WP_054213495","WP_054213495_1","WP_054213495_1","Actinobacteria","none","none","WP_054213495_1","Actinobacteria bacterium OK074","6756","1","26.16","no","MAETTHPPNASNTPDFRTWCAWHQGYSDTTRAVRAIEQASGPGYVLYACKGCRTINHLTLLAEQP","WP_054213495_1","none"
"310","WP_111209344","WP_111209344_3","WP_111209344_3","Curtobacterium","none","none","WP_111209344_3","Curtobacterium sp. MCSS17_015","59","3","16.71","yes","MNSDLFSATERNVGATRQAGGYGPGVAIEVPASSAVARTTDAH","WP_111209344_3","none"
"311","WP_110911190","WP_110911190_4","WP_110911190_4","Curtobacterium","none","none","WP_110911190_4","Curtobacterium sp. MCPF17_050","58","4","16.6","yes","MHSNLFSATERNVGATRQAGGYGPGVAIQVPASSAVTRTTDAH","WP_110911190_4","none"
"312","WP_101368245","WP_101368245_1","WP_101368245_1","Plantactinospora","none","none","WP_101368245_1","Plantactinospora sp. CNZ320","58","1","33.28","yes","MDMNETFDEFSELSPDELQRTLEDFGLEPGRLGVGAVVEIVTGFASDLPGRH","WP_101368245_1","none"
"313","PKV30436","PKV30436_1","PKV30436_1","Plantactinospora","none","none","PKV30436_1","Plantactinospora sp. CNZ320","154","1","33.28","yes","MDMNETFDEFSELSPDELQRTLEDFGLEPGRLGVGAVVEIVTGFASDLPGRH","PKV30436_1","none"
"314","OJV25031","OJV25031_2","OJV25031_2","Actinobacteria","none","none","OJV25031_2","Actinobacteria bacterium 69-20","7427","2","2.31","yes","MVLWLLVLVLVHQLHVRLQLVTANAIPWHVTKSRPGPPHVSDLPKGGDHMETGVEDFLQIEDLEDRSELVHGACACTTSCGCTSCSCVVWW","OJV25031_2","none"
"315","OJV25031","OJV25031_3","OJV25031_3","Actinobacteria","none","none","OJV25031_3","Actinobacteria bacterium 69-20","7836","3","2.27","yes","MDAQILDDQLAPPDAALLVIEDLEERSELSHGACACTCSCGCTSCSCVAWA","OJV25031_3","none"
"316","WP_067972339","WP_067972339_3","WP_067972339_3","Nocardiopsis","Protein of unknown function (DUF1048)","PF06304.11","WP_067972339_3","Nocardiopsis trehalosi NBRC 14201","2626","3","73.98","no","MNIWTAMTGSDLTREWKAFEARATALPADHRAAWDQIVAHLFPYGNFTGRNLMPIVDGALGLLEEAAADGQSSREVLGDDIPGFCAALAGGEGARNHRDRWREQLNRNVARKLGR","WP_067972339_3","5.00E-33"
"317","WP_111166051","WP_111166051_3","WP_111166051_3","Sphaerisporangium","Protein of unknown function (DUF1048)","PF06304.11","WP_111166051_3","Sphaerisporangium sp. 7K107","5258","3","48.6","yes","MNFWETITGSDLTREWKAFEARAEALPADYRAAWEEINRHLSPYTDFTGRNLIPILDGALGLLEETAADGQSIHEVLGDDIEGFCAALAGGQGARSYRDRWREQLNRNVARKLGRLGG","WP_111166051_3","2.20E-36"
"318","WP_092862843","WP_092862843_1","WP_092862843_1","Quadrisphaera","none","none","WP_092862843_1","Quadrisphaera sp. DSM 44207","88","1","62.91","yes","MSEPLDYEPSLYRVTVVVDLDDPAADGLEGAVAAALPLDLVPAMADEQAREDAATLSTDRRALDVVVLAEGGTPAEAERTGVAAVEAALRGAGLGPSTARPGQARVEDAYEPGAPAAR","WP_092862843_1","none"
"319","SDQ22037","SDQ22037_1","SDQ22037_1","Quadrisphaera","none","none","SDQ22037_1","Quadrisphaera sp. DSM 44207","52","1","62.91","yes","MSEPLDYEPSLYRVTVVVDLDDPAADGLEGAVAAALPLDLVPAMADEQAREDAATLSTDRRALDVVVLAEGGTPAEAERTGVAAVEAALRGAGLGPSTARPGQARVEDAYEPGAPAAR","SDQ22037_1","none"
"320","SDN00667","SDN00667_4","SDN00667_4","Lentzea","none","none","SDN00667_4","Lentzea violacea","6089","4","8.65","yes","MVVNFCAQVVAALGYGQYFPWSVPALFSGLAGPDAGSPGLLGVSLVAIVGVAGMVATALWWCNADQDR","SDN00667_4","none"
"321","WP_090014707","WP_090014707_4","WP_090014707_4","Lentzea","none","none","WP_090014707_4","Lentzea violacea","6089","4","8.65","yes","MVVNFCAQVVAALGYGQYFPWSVPALFSGLAGPDAGSPGLLGVSLVAIVGVAGMVATALWWCNADQDR","WP_090014707_4","none"
"322","WP_116200011","WP_116200011_3","WP_116200011_3","Amycolatopsis","none","none","WP_116200011_3","Amycolatopsis circi","7600","3","1.13","yes","MAVVGVVAEHGVEDVAASAGEAY","WP_116200011_3","none"
"323","OLB80605","OLB80605_4","OLB80605_4","Actinobacteria","Ferric uptake regulator family","PF01475.19","OLB80605_4","Actinobacteria bacterium 13_2_20CM_2_71_6","5455","4","13.09","no","MATVVDSADAVRTLRDAGLRVTSQRVAVVGVLAEGGHVDVETLTSKARERLGTLTSQAVYEMLPPYPPGAGRLGGPRTRHRRAVPGLPYRRTGALTRRSLPAVQLQR","OLB80605_4","4.50E-07"
"324","WP_123601960","WP_123601960_1","WP_123601960_1","Micromonospora","none","none","WP_123601960_1","Micromonospora sp. Llam0","6472","1","35.4","yes","MTTTGPVGCTVTVCRDCCCGNPSKRPAVDHDGQLRRLREALTGRHRVRTSQCLDVCDQANVIVVHPTPATRRAGARPVWFGLVDAPAIDDDLIGWVLDGGPGVAPLPPILELSVVTAPAQ","WP_123601960_1","none"
"325","WP_123601959","WP_123601959_1","WP_123601959_1","Micromonospora","none","none","WP_123601959_1","Micromonospora sp. Llam0","5087","1","35.4","yes","MTTTGPVGCTVTVCRDCCCGNPSKRPAVDHDGQLRRLREALTGRHRVRTSQCLDVCDQANVIVVHPTPATRRAGARPVWFGLVDAPAIDDDLIGWVLDGGPGVAPLPPILELSVVTAPAQ","WP_123601959_1","none"
"326","EMF02011","EMF02011_3","EMF02011_3","Streptomyces","none","none","EMF02011_3","Streptomyces mobaraensis NBRC 13819 = DSM 40847","7212","3","10.8","yes","MRRQSGPRRVRLYDARAAGLTYLANKGVLGHILARWAGHANVKTTEKWYVKPGVDDLRPAAEAWGGVVEAGTPVREIL","EMF02011_3","none"
"327","WP_040887728","WP_040887728_3","WP_040887728_3","Streptomyces","none","none","WP_040887728_3","Streptomyces mobaraensis NBRC 13819 = DSM 40847","7212","3","10.8","yes","MRRQSGPRRVRLYDARAAGLTYLANKGVLGHILARWAGHANVKTTEKWYVKPGVDDLRPAAEAWGGVVEAGTPVREIL","WP_040887728_3","none"
"328","WP_123074529","WP_123074529_2","WP_123074529_2","Streptomyces","Domain of unknown function (DUF4287)","PF14117.6","WP_123074529_2","Streptomyces sp. ADI91-18","6786","2","57.96","no","MSFQAYLDTIESKTGLTPREFIALAKERGFDGPATKAGPVLEWLKQDYGLGRGHGMALVHVFKNGAKIDSKHVGTTGSHRDESDTLWLDGKSSRPA","WP_123074529_2","1.00E-27"
"329","WP_130451801","WP_130451801_2","WP_130451801_2","Zhihengliuella","Domain of unknown function (DUF4287)","PF14117.6","WP_130451801_2","Zhihengliuella halotolerans","7148","2","47.16","yes","MSFQAYLDAAEAKTGLTPRQLLELAQGRGYDGPDVKAGEILDWLKNDYGLGRGHGMAIVHVIKNGPGIDPKHVGSSGSHRDASDTLWLEGKASKPA","WP_130451801_2","5.00E-27"
"330","WP_062760655","WP_062760655_3","WP_062760655_3","Streptomyces","none","none","WP_062760655_3","Streptomyces sp. WAC00288","1832","3","21.57","no","MRTENTIEASEDLFDEAVPTTIAHESASYTDE","WP_062760655_3","none"
"331","WP_052499830","WP_052499830_2","WP_052499830_2","Streptomyces","none","none","WP_052499830_2","Streptomyces vietnamensis","1831","2","22.38","no","MRTENTIEASEDLFDEAVPTTIAHEAASYTDE","WP_052499830_2","none"
"332","WP_030578068","WP_030578068_2","WP_030578068_2","Streptomyces","none","none","WP_030578068_2","Streptomyces globisporus subsp. globisporus","7149","2","21.79","yes","MRRLWVRISKCSRESLYLCGDLMTQYTFFSVGSGTGPATDAPVRVTVSTIFFAEESMTSWS","WP_030578068_2","none"
"333","WP_119286192","WP_119286192_3","WP_119286192_3","Streptomyces","none","none","WP_119286192_3","Streptomyces sp. YIM 130001","7810","3","4.56","yes","MSTPAGRSRRISESTVLGVGSRMSIRRLCVRISKCSRASLYLCGDLMTQYTFFSVGSGTGPATDAPVRVTVSTIFFAEESMTSWS","WP_119286192_3","none"
"334","EFL12569","EFL12569_2","EFL12569_2","Streptomyces","none","none","EFL12569_2","Streptomyces sp. AA4","6989","2","30.14","no","MSGLEIVLGRTDDLNCRRCGGELLLIVRVPTTTPLPAGDTVDSYRTVELCPRCDRDDQAAQGVLACFAVHERIEHDTVNDLAPALREWLAHLAANPPTYTEAELDEDIRQWQAGEM","EFL12569_2","none"
"335","WP_078561279","WP_078561279_3","WP_078561279_3","Amycolatopsis","none","none","WP_078561279_3","Amycolatopsis sp. AA4","6816","3","30.14","no","MSGLEIVLGRTDDLNCRRCGGELLLIVRVPTTTPLPAGDTVDSYRTVELCPRCDRDDQAAQGVLACFAVHERIEHDTVNDLAPALREWLAHLAANPPTYTEAELDEDIRQWQAGEM","WP_078561279_3","none"
"336","WP_134128179","WP_134128179_1","WP_134128179_1","Microbacterium","none","none","WP_134128179_1","Microbacterium sp. NFIX05","66","1","19.44","yes","MSAPTIRDVGEHLDALLESWGPELEQDDMGRVTIPGNNNMVAPVQFSWAD","WP_134128179_1","none"
"337","PZS01282","PZS01282_1","PZS01282_1","Pseudonocardiales","none","none","PZS01282_1","Pseudonocardiales bacterium","154","1","29.33","yes","MASPTLRDVGEHLDTLLESWGPDLEQDDLGRVTIPGNNNMVAPVQFEWAPEED","PZS01282_1","none"
"338","WP_063758854","WP_063758854_1","WP_063758854_1","Streptomyces","none","none","WP_063758854_1","Streptomyces sp. NRRL S-340","5485","1","18.55","no","MNLSTAQVPTEKWSTNPESQALLAASCCCSSVLCCCCCGVATGMSAVRTTEAELVPAGR","WP_063758854_1","none"
"339","WP_037862255","WP_037862255_1","WP_037862255_1","Streptomyces","none","none","WP_037862255_1","Streptomyces sp. NRRL S-340","140","1","23.55","yes","MNLSTAQVPTEKWSTNPESQALLAASCCCSSVLCCCCCGVATGMSAVRTTEAELVPAGR","WP_037862255_1","none"
"340","QBI53056","QBI53056_1","QBI53056_1","Streptomonospora","Endoribonuclease L-PSP","PF01042.21","QBI53056_1","Streptomonospora sp. M2","2791","1","37.67","yes","MRRFRTDGRLNVYSTDVDLLFQHYGVLASRLGAAGVAPPATVLGVARLALPGLMVEIEGTAVA","QBI53056_1","2.90E-07"
"341","WP_131102102","WP_131102102_1","WP_131102102_1","Streptomonospora","Endoribonuclease L-PSP","PF01042.21","WP_131102102_1","Streptomonospora sp. M2","2827","1","37.67","yes","MRRFRTDGRLNVYSTDVDLLFQHYGVLASRLGAAGVAPPATVLGVARLALPGLMVEIEGTAVA","WP_131102102_1","2.90E-07"
"342","WP_120205519","WP_120205519_1","WP_120205519_1","Actinomyces","none","none","WP_120205519_1","Actinomyces sp. 2129","1245","1","25.77","yes","MGSEVRRGALIGVTCAAIGSAGYYLTTPDIVGALFVGVIGLAISVVIFVIMSIVGRGRHDDEP","WP_120205519_1","none"
"343","WP_119835460","WP_119835460_1","WP_119835460_1","Actinomyces","none","none","WP_119835460_1","Actinomyces sp. 2119","1008","1","25.77","yes","MGSEVRRGALIGVTCAAIGSAGYYLTTPDIVGALFVGVIGLAISVVIFVIMSIVGRGRHDDEP","WP_119835460_1","none"
"344","AND16936","AND16936_3","AND16936_3","Rathayibacter","none","none","AND16936_3","Rathayibacter tritici","1530","3","4.89","yes","MFRGGASSVAGSFVFDVADREPEELDHGVVVGEVSAVIRDFAELKVQRLDRVGRADHSVGVGQQREEMVWAAPRRSRTPLPRCGFSRPDSDAVNASSAVLAASVVGAY","AND16936_3","none"
"345","WP_084415931","WP_084415931_3","WP_084415931_3","Rathayibacter","none","none","WP_084415931_3","Rathayibacter tritici","1554","3","4.09","yes","MFRGGASSVAGSFVFDVADREPEELDHGVVVGEVSAVIRDFAELKVQRLDRVGRADHSVGVGQQREEMVWAAPRRSRTPLPRCGFSRPDSDAVNASIAVLAASAVGAY","WP_084415931_3","none"
"346","WP_080654621","WP_080654621_1","WP_080654621_1","Cutibacterium","none","none","WP_080654621_1","Cutibacterium avidum TM16","26","1","14.27","yes","MLSELKTDDFVKVEVDPRGENILAPNGNHHPSTDPK","WP_080654621_1","none"
"347","WP_129587643","WP_129587643_3","WP_129587643_3","Actinomyces","none","none","WP_129587643_3","Actinomyces minihominis","169","3","15.1","yes","MQPKVIVPDVDLDNEFLEVELEPRSENILAPNGNHHPSVDPT","WP_129587643_3","none"
"348","WP_084415984","WP_084415984_1","WP_084415984_1","Rathayibacter","Lsr2","PF11774.8","WP_084415984_1","Rathayibacter tritici","4750","1","43.53","yes","MAQKVTLVDDIDGSLIDDDGGTIRFSIDGSNYEIDLSADNTSKLHKALDKFVLNSRKVRAASLAAPSSGAARKSDPERLRAVREWANANGYRVSSRGRIPQEVMDAFDAAN","WP_084415984_1","3.40E-39"
"349","SEH00212","SEH00212_2","SEH00212_2","Nonomuraea","Lsr2","PF11774.8","SEH00212_2","Nonomuraea solani","7206","2","52.02","yes","MAKRIVESFIDDIDGRDAEGTTRFALDGTSYEIDLSGSNREKLEKALAPFITKARAVRADRVVRGRRGAGSGHTVTRDKATEIRRWAKAQGLPVSERGRIAATVVEQYEAAH","SEH00212_2","6.30E-40"
"350","WP_071934999","WP_071934999_1","WP_071934999_1","Rhodococcus","Transposase","PF01527.20","WP_071934999_1","Rhodococcus sp. 2G","2684","1","32.96","yes","MPKPYPKEFRDDVVRVARNREPGQHLRQIAADFGISESCLTNWLRNADVEDGTKPGTTNEESRENRELRKRIRLLEQENEVLRRAAAYLSQANLPGK","WP_071934999_1","1.40E-11"
"351","WP_112443292","WP_112443292_2","WP_112443292_2","Streptomyces","none","none","WP_112443292_2","Streptomyces sp. ZFG47","439","2","20.48","no","MPEPCLEGFREDVVPVARIGDPSVELEQAAAVFGVRAMSLSKWMRRTDIDTAAQLETTGHDSVELRKARRQIKLIVLENEILCRGAAHLTAANLLG","WP_112443292_2","none"
"352","WP_023550873","WP_023550873_2","WP_023550873_2","Streptomyces","Ribosomal protein S20","PF01649.18","WP_023550873_2","Streptomyces roseochromogenus subsp. oscitans DS 12.976","6412","2","53.71","no","MANIKSQIKRIKTNEKARLRNKAVKSSLKTAIRKAREAVAAGDVEKATVAVREASRKLDKAVSKGVIHKNQAANKKSALASKVTSLKG","WP_023550873_2","1.30E-31"
"353","WP_012086849","WP_012086849_1","WP_012086849_1","Kineococcus","Ribosomal protein S20","PF01649.18","WP_012086849_1","Kineococcus radiotolerans SRS30216 = ATCC BAA-149","5717","1","63.12","no","MANIKSQKKRILTNEKARLRNKAVKSELRTVVRGFREALAAGDAEKAQAALALASKKLDKAVSKGVIHKNQAANRKSAIAKAAAKV","WP_012086849_1","6.50E-32"
"354","WP_018962008","WP_018962008_7","WP_018962008_7","Streptomyces","none","none","WP_018962008_7","Streptomyces sp. CNB091","5848","7","9.92","no","MVSGGVAEGGGDVGVAVLAVDADGEVAQAGHDAGRVAGADVRGVLVEGAVADVVRLVLDAPVAADPGRGLAAG","WP_018962008_7","none"
"355","WP_018962008","WP_018962008_4","WP_018962008_4","Streptomyces","none","none","WP_018962008_4","Streptomyces sp. CNB091","5827","4","14.92","yes","MVSGGVAEGGGDVGVAVLAVDADGEVAQAGHDAGRVAGADVRGVLVEGAVADVVRLVLDAPVAADPGRGLAAG","WP_018962008_4","none"
"356","WP_028427539","WP_028427539_3","WP_028427539_3","Streptomyces","none","none","WP_028427539_3","Streptomyces sp. TAA040","6841","3","9.06","yes","MGKKELANGYRVTWSSTSRAFRGR","WP_028427539_3","none"
"357","WP_078515914","WP_078515914_2","WP_078515914_2","Streptomyces","none","none","WP_078515914_2","Streptomyces sp. TAA040","5499","2","9.06","yes","MGKKELANGYRVTWSSTSRAFRGR","WP_078515914_2","none"
"358","WP_064110435","WP_064110435_2","WP_064110435_2","Leifsonia","HU domain fused to wHTH, Ig, or Glycine-rich moti","PF18291.1","WP_064110435_2","Leifsonia xyli","5426","2","66.04","yes","MADNLNKTELVAAVAAASGQSQATVSSVVDAFFSTISETVAKGGKVTIPGWLAAERSETAARTGRNPQTGEEISIPAGHRVKLTAGSKLKAAVK","WP_064110435_2","2.60E-07"
"359","WP_090039557","WP_090039557_2","WP_090039557_2","Leifsonia","HU domain fused to wHTH, Ig, or Glycine-rich moti","PF18291.1","WP_090039557_2","Leifsonia sp. CL147","5475","2","69.28","yes","MADNLNKTELVAAVAAASGQSQATVSSVVDAFFSTISETVAKGGKVTIPGWLAAERSETAARTGRNPQTGAEISIPAGHRVKLTAGSKLKAAVK","WP_090039557_2","2.20E-07"
"360","WP_121030237","WP_121030237_1","WP_121030237_1","Terracoccus","Urease, gamma subunit","PF00547.18","WP_121030237_1","Terracoccus luteus","7149","1","58.4","yes","MNLSPADTEKLLLAVAGMVARDRLSRGLRLNHPEAVALLSTWVIERAREGALVTDLMESGREVLSRDQVMEGVAEMIADVQVEATFPDGRKLVTLHHPIS","WP_121030237_1","2.20E-46"
"361","RKT76768","RKT76768_1","RKT76768_1","Terracoccus","Urease, gamma subunit","PF00547.18","RKT76768_1","Terracoccus luteus","7164","1","58.4","yes","MNLSPADTEKLLLAVAGMVARDRLSRGLRLNHPEAVALLSTWVIERAREGALVTDLMESGREVLSRDQVMEGVAEMIADVQVEATFPDGRKLVTLHHPIS","RKT76768_1","2.20E-46"
"362","SDQ22037","SDQ22037_2","SDQ22037_2","Quadrisphaera","Rhodanese-like domain","PF00581.20","SDQ22037_2","Quadrisphaera sp. DSM 44207","7143","2","57.76","no","MASDLPTASVREVPEGAVLLDVREDDEWAAGHAPGAVHVPLGDLPARLGELPEDDVYVVCRSGGRSARAVAWLTHHGVDAVNVDGGMGAWQDAGLPLVGEGPEEPRVL","SDQ22037_2","4.40E-20"
"363","WP_092862843","WP_092862843_2","WP_092862843_2","Quadrisphaera","Rhodanese-like domain","PF00581.20","WP_092862843_2","Quadrisphaera sp. DSM 44207","7143","2","57.76","no","MASDLPTASVREVPEGAVLLDVREDDEWAAGHAPGAVHVPLGDLPARLGELPEDDVYVVCRSGGRSARAVAWLTHHGVDAVNVDGGMGAWQDAGLPLVGEGPEEPRVL","WP_092862843_2","4.40E-20"
"364","ONF71729","ONF71729_1","ONF71729_1","Amycolatopsis","Protein of unknown function (DUF3892)","PF13031.6","ONF71729_1","Amycolatopsis keratiniphila subsp. keratiniphila","5416","1","62.92","yes","MAIKIIAARLEGGKFHESITKLRWINPGSGETGESFVSAIVAWLEDDDGKAYVDEGIHRVAVEIIKPTFGPKFLRTRADGIWKNNLLELPRF","ONF71729_1","1.70E-18"
"365","WP_083715657","WP_083715657_1","WP_083715657_1","Amycolatopsis","Protein of unknown function (DUF3892)","PF13031.6","WP_083715657_1","Amycolatopsis keratiniphila subsp. nogabecina","5353","1","62.92","yes","MAIKIIAARLEGGKFHESITKLRWINPGSGETGESFVSAIVAWLEDDDGKAYVDEGIHRVAVEIIKPTFGPKFLRTRADGIWKNNLLELPRF","WP_083715657_1","1.70E-18"
"366","WP_121148667","WP_121148667_2","WP_121148667_2","Microbacterium","none","none","WP_121148667_2","Microbacterium sp. AG1240","499","2","0.14","yes","MTGAANGTVSSMTTAETLSQSFMGFIVVCAVTAKWALTIRGSVISRGRGRLLHR","WP_121148667_2","none"
"367","RKT36058","RKT36058_3","RKT36058_3","Microbacterium","none","none","RKT36058_3","Microbacterium sp. AG1240","922","3","0.14","yes","MTGAANGTVSSMTTAETLSQSFMGFIVVCAVTAKWALTIRGSVISRGRGRLLHR","RKT36058_3","none"
"368","WP_094002561","WP_094002561_1","WP_094002561_1","Amycolatopsis","none","none","WP_094002561_1","Amycolatopsis thermalba","2990","1","14.46","no","MSDRHDSLALLANSVAASVRFTIPTRLSSARHRGRRLAGLAIRLREDDVSIVGGMADTASQVGGSLWLPVPDTTATR","WP_094002561_1","none"
"369","WP_116110588","WP_116110588_1","WP_116110588_1","Amycolatopsis","none","none","WP_116110588_1","Amycolatopsis ruanii","2990","1","14.46","no","MSDRHDSLALLANSVAASVRFTIPTRLSSARHRGRRLAGLAIRLREDDVSIVGGMADTASQVGGSLWLPVPDTTATR","WP_116110588_1","none"
"370","WP_052318929","WP_052318929_2","WP_052318929_2","Streptomyces","none","none","WP_052318929_2","Streptomyces pluripotens","765","2","20.87","yes","MTRAHGAGAAPVVAGDGVGLRPARAVTGSGTVDVPPGGWAGFLPRSGTGSPPRRAVGEIGAGAPTAVPGPAGTAVPAEPRSRARARAASVGAGTRASLAPVTSPAAEPGGPR","WP_052318929_2","none"
"371","KIE24863","KIE24863_3","KIE24863_3","Streptomyces","none","none","KIE24863_3","Streptomyces sp. MUSC 125","765","3","20.87","yes","MTRAHGAGAAPVVAGDGVGLRPARAVTGSGTVDVPPGGWAGFLPRSGTGSPPRRAVGEIGAGAPTAVPGPAGTAVPAEPRSRARARAASVGAGTRASLAPVTSPAAEPGGPR","KIE24863_3","none"
"372","WP_093264055","WP_093264055_1","WP_093264055_1","Thermostaphylospora","none","none","WP_093264055_1","Thermostaphylospora chromogena","3690","1","23.71","no","MTSTASAARPLVPALVAIAAAEAATLAAHAAGFDVRGFTWLIAALVAGASLSGSV","WP_093264055_1","none"
"373","SDR04557","SDR04557_1","SDR04557_1","Thermostaphylospora","none","none","SDR04557_1","Thermostaphylospora chromogena","3522","1","23.71","no","MTSTASAARPLVPALVAIAAAEAATLAAHAAGFDVRGFTWLIAALVAGASLSGSV","SDR04557_1","none"
"374","WP_083597223","WP_083597223_1","WP_083597223_1","Actinomadura","none","none","WP_083597223_1","Actinomadura madurae","2765","1","69.08","yes","MIDVDRTSVAMGDDALPHAETIDLPGETPLAEVVAYLLERNFLATIASGKATWILMADRPLAVVAQQWDEPRFLVDASRPISSFAAEGRGVSLLFRYWKQHDPDHVYEELAAGRLPER","WP_083597223_1","none"
"375","SFN21853","SFN21853_1","SFN21853_1","Actinomadura","none","none","SFN21853_1","Actinomadura madurae","2765","1","69.08","yes","MIDVDRTSVAMGDDALPHAETIDLPGETPLAEVVAYLLERNFLATIASGKATWILMADRPLAVVAQQWDEPRFLVDASRPISSFAAEGRGVSLLFRYWKQHDPDHVYEELAAGRLPER","SFN21853_1","none"
"376","WP_089774243","WP_089774243_3","WP_089774243_3","Haloactinobacterium","none","none","WP_089774243_3","Haloactinobacterium album","3801","3","32.41","no","MDAHYDLFHAEMAERRERLLTQLAPGRTRRRLSLRRLVAERSDARTARLGRTLTPKDLERRA","WP_089774243_3","none"
"377","SEE89807","SEE89807_2","SEE89807_2","Haloactinobacterium","none","none","SEE89807_2","Haloactinobacterium album","3801","2","32.41","no","MDAHYDLFHAEMAERRERLLTQLAPGRTRRRLSLRRLVAERSDARTARLGRTLTPKDLERRA","SEE89807_2","none"
"378","WP_078841030","WP_078841030_1","WP_078841030_1","Streptomyces","none","none","WP_078841030_1","Streptomyces antioxidans","4408","1","37.55","yes","MTDTGSVSDGFHTFDELYEFRLLYHAHAVRAWLAAKYPVVRSWKHHDGEPCFGGGWFIVVAQLPTGQVSNHYRANSWSLFGDVPEVETAPVWDGHSTTDVARRLRTLLSGDGSTSAAS","WP_078841030_1","none"
"379","OPF84252","OPF84252_1","OPF84252_1","Streptomyces","none","none","OPF84252_1","Streptomyces antioxidans","4465","1","37.55","yes","MTDTGSVSDGFHTFDELYEFRLLYHAHAVRAWLAAKYPVVRSWKHHDGEPCFGGGWFIVVAQLPTGQVSNHYRANSWSLFGDVPEVETAPVWDGHSTTDVARRLRTLLSGDGSTSAAS","OPF84252_1","none"
"380","KOU46944","KOU46944_4","KOU46944_4","Streptomyces","none","none","KOU46944_4","Streptomyces sp. MMG1522","1547","4","9.96","no","MERASLSVLRSMKATRAKPVARAVKKDSRLMARAAAMARYPLIMSSARETMANSGSTRMRLPARVLAASEWL","KOU46944_4","none"
"381","KOG82578","KOG82578_6","KOG82578_6","Streptomyces","none","none","KOG82578_6","Streptomyces griseus subsp. rhodochrous","1529","6","9.96","no","MERASLSVLRSMKATRAKPVARAVKKDSRLMARAAAMARYPLIMSSARETMANSGSTRMRLPARVLAASEWL","KOG82578_6","none"
"382","WP_093583210","WP_093583210_5","WP_093583210_5","Geodermatophilus","none","none","WP_093583210_5","Geodermatophilus amargosae","7172","5","11.09","yes","MHGWRSQVRDRDPATFREHVLGRVAWAGSVDPVLGARLRDLAARRLGRPRDGMIAGVPLLTSER","WP_093583210_5","none"
"383","WP_091114658","WP_091114658_2","WP_091114658_2","Geodermatophilus","none","none","WP_091114658_2","Geodermatophilus dictyosporus","4423","2","11.3","yes","MHPGKTRVAGPGRRRQVLGAVVNVRPTLPRPERDALRALLHNCAVHGWASQVRDADPATFRDAVLGRVAWASSVDPVLGGRLHVLAGRIDWGAARA","WP_091114658_2","none"
"384","PDQ36093","PDQ36093_3","PDQ36093_3","Candidatus","none","none","PDQ36093_3","Candidatus Lumbricidophila eiseniae","1876","3","16.01","yes","MGAEVVTYTVLVSQSIWSQAGVPPSFQCRGVTYREILDDAAGQYPPLLPYVGGGQIPLAASVVLFADGRQVEDVTAAVPGPIAELRIVLPSSGG","PDQ36093_3","none"
"385","PDQ36095","PDQ36095_2","PDQ36095_2","Candidatus","none","none","PDQ36095_2","Candidatus Lumbricidophila eiseniae","4090","2","16.01","yes","MGAEVVTYTVLVSQSIWSQAGVPPSFQCRGVTYREILDDAAGQYPPLLPYVGGGQIPLAASVVLFADGRQVEDVTAAVPGPIAELRIVLPSSGG","PDQ36095_2","none"
"386","WP_091067169","WP_091067169_3","WP_091067169_3","Klenkia","none","none","WP_091067169_3","Klenkia brasiliensis","7842","3","25.11","no","MTEPDEKDQSDTSSDTEAQLHAGPRDEGGEGGMATRELRAREADAD","WP_091067169_3","none"
"387","SDG90099","SDG90099_2","SDG90099_2","Klenkia","none","none","SDG90099_2","Klenkia brasiliensis","7842","2","25.11","no","MTEPDEKDQSDTSSDTEAQLHAGPRDEGGEGGMATRELRAREADAD","SDG90099_2","none"
"388","WP_073452776","WP_073452776_2","WP_073452776_2","Actinomyces","VanZ like family","PF04892.12","WP_073452776_2","Actinomyces denticolens","6032","2","28.17","no","MAVLWPSGGDIATTKGLLGPFFLGEAGKDIVLNLVMLAPLTAILTLAWPRVPWWAWALLGCLIGAGAELAQALIPALDRRPSPANAAQNAVGSWCGAAIGLIVSRLIERHSRP","WP_073452776_2","2.60E-09"
"389","WP_017177815","WP_017177815_1","WP_017177815_1","Actinomyces","VanZ like family","PF04892.12","WP_017177815_1","Actinomyces timonensis DSM 23838","6574","1","34.57","no","MAVLWPSGGDIASTKSFLGPFFLGEVGKDIVLNLIMLAPLTAILTLAWPRVAWWRWALLGCLIGAGAELAQALIPALARRPSLANVAQNAVGSWCGAVAGLMVSRVVERRRRP","WP_017177815_1","1.40E-10"
"390","KPC95547","KPC95547_3","KPC95547_3","Streptomyces","none","none","KPC95547_3","Streptomyces sp. NRRL F-6602","4903","3","8.42","no","MAGGPGPLEGALRNWHGRLSARGRAMLSGAAELEGHLTERG","KPC95547_3","none"
"391","WP_031027146","WP_031027146_3","WP_031027146_3","Streptomyces","none","none","WP_031027146_3","Streptomyces sp. NRRL F-5639","4910","3","8.42","no","MAGGPGPLEGALRNWHGRLSARGRAMLSGAAELEGHLTERG","WP_031027146_3","none"
"392","WP_084902797","WP_084902797_2","WP_084902797_2","Streptomyces","none","none","WP_084902797_2","Streptomyces sp. CB03238","31","2","30.05","yes","MQYSNEELAEVFEVEEIDEETVVSVAHHT","WP_084902797_2","none"
"393","OKJ94941","OKJ94941_1","OKJ94941_1","Streptomyces","none","none","OKJ94941_1","Streptomyces sp. CB03234","108","1","29.87","yes","MQYSNEELAEVFEVEEIDEETVVSVAHHT","OKJ94941_1","none"
"394","WP_114029352","WP_114029352_1","WP_114029352_1","Sphaerisporangium","STAS domain","PF01740.21","WP_114029352_1","Sphaerisporangium album","4711","1","63.93","yes","MTTPLTLVVAERPDGTPVLAVSGEIDMSNAGALDDALTRSTGDGLLLVDLSAVDYLDSAGLTVLFSHSSRIRLVANPLLAPVLTISGLTEVTTVEGIASDGTATGSDDS","WP_114029352_1","5.90E-13"
"395","WP_083982727","WP_083982727_1","WP_083982727_1","Actinomadura","STAS domain","PF01740.21","WP_083982727_1","Actinomadura hibisca NBRC 15177","3942","1","66.4","yes","MTTPLTLTPGRRPDGTALLTAVGEIDMSNTGDLAAALDGTPGPLVLDLTGVEYLDSAGLSVLFPHAERLELIAGPLLMPVLTISGLAELATVHE","WP_083982727_1","5.20E-09"
"396","RPF24868","RPF24868_3","RPF24868_3","Streptomyces","S-adenosylmethionine synthetase, N-terminal domai","PF00438.20","RPF24868_3","Streptomyces sp. TLI_185","6715","3","15.65","no","MSRRPFTSETVVEGHPDRFADRIGGTVLDAHHEQAAYIGVEVEGPYKPDHDRC","RPF24868_3","8.90E-13"
"397","WP_123971014","WP_123971014_4","WP_123971014_4","Streptomyces","S-adenosylmethionine synthetase, N-terminal domai","PF00438.20","WP_123971014_4","Streptomyces sp. TLI_185","6649","4","15.65","no","MSRRPFTSETVVEGHPDRFADRIGGTVLDAHHEQAAYIGVEVEGPYKPDHDRC","WP_123971014_4","8.90E-13"
"398","WP_119286192","WP_119286192_2","WP_119286192_2","Streptomyces","Ribosomal protein S10p/S20e","PF00338.22","WP_119286192_2","Streptomyces sp. YIM 130001","7775","2","52.83","no","MAGQKIRIRLKAYDHEVIDSSAKKIVETVTRTGASVAGPVPLPTEKNVYCVIKSPHKYKDAREHFEMRTHKRLIDILDPTPKTVDSLMRLDLPAGVDIEIKL","WP_119286192_2","4.80E-40"
"399","WP_030578068","WP_030578068_1","WP_030578068_1","Streptomyces","Ribosomal protein S10p/S20e","PF00338.22","WP_030578068_1","Streptomyces globisporus subsp. globisporus","7114","1","63.7","no","MAGQKIRIRLKAYDHEVIDSSAKKIVETVTRTGASVAGPVPLPTEKNVYCVIKSPHKYKDSREHFEMRTHKRLIDILDPTPKTVDSLMRLDLPAGVDIEIKL","WP_030578068_1","5.00E-41"
"400","PDQ36095","PDQ36095_4","PDQ36095_4","Candidatus","N-terminal 7TM region of histidine kinase","PF16927.5","PDQ36095_4","Candidatus Lumbricidophila eiseniae","6329","4","14.97","no","MKEKTTRRSLLLVSAILALLLGIGFNASDKGIRWFWTDVPWMGVILVLAATVLGVLHFLGRSRVRSRPRKEVKGG","PDQ36095_4","4.30E-08"
"401","PDQ36099","PDQ36099_2","PDQ36099_2","Candidatus","N-terminal 7TM region of histidine kinase","PF16927.5","PDQ36099_2","Candidatus Lumbricidophila eiseniae","2439","2","14.97","no","MKEKTTRRSLLLVSAILALLLGIGFNASDKGIRWFWTDVPWMGVILVLAATVLGVLHFLGRSRVRSRPRKEVKGG","PDQ36099_2","4.30E-08"
"402","WP_082115066","WP_082115066_3","WP_082115066_3","Lentzea","thiovirid_RiPP: thioviridamide family RiPP peptid","NF033415.1","WP_082115066_3","Lentzea aerocolonigenes","0","3","22.6","yes","MENQQLADLADMSSARLQEFMESARSSGMTQGLAGTGVALIAQVD","WP_082115066_3","1.10E-06"
"403","KJK44488","KJK44488_3","KJK44488_3","Lentzea","thiovirid_RiPP: thioviridamide family RiPP peptid","NF033415.1","KJK44488_3","Lentzea aerocolonigenes","87","3","22.6","yes","MENQQLADLADMSSARLQEFMESARSSGMTQGLAGTGVALIAQVD","KJK44488_3","1.10E-06"
"404","WP_131102102","WP_131102102_9001","WP_131102102_9001","Streptomonospora","plantaricin: plantaricin C family lantibiotic","NF000539.0","WP_131102102_9001","Streptomonospora sp. M2","15593","9001","27.27","no","MSTALLERTETEIDPAGATADDLHVDNLISESHDIYAASSGWVCTLTIECGTLVCACQ","WP_131102102_9001","1.60E-07"
"405","QBI53056","QBI53056_9001","QBI53056_9001","Streptomonospora","plantaricin: plantaricin C family lantibiotic","NF000539.0","QBI53056_9001","Streptomonospora sp. M2","15557","9001","27.27","no","MSTALLERTETEIDPAGATADDLHVDNLISESHDIYAASSGWVCTLTIECGTLVCACQ","QBI53056_9001","1.60E-07"
"406","ACZ89043","ACZ89043_2","ACZ89043_2","Streptosporangium","Transmembrane secretion effector","PF05977.13","ACZ89043_2","Streptosporangium roseum DSM 43021","3080","2","32.65","yes","MSVRQALVPPHLFGRVLGAIRTLLWGLIPLGALAGGLLAGAFGLRAVFMISGCVMLALMVPLCWVLWRHRELINTLREPGTVDT","ACZ89043_2","5.30E-07"
"407","WP_081453250","WP_081453250_2","WP_081453250_2","Streptosporangium","Transmembrane secretion effector","PF05977.13","WP_081453250_2","Streptosporangium roseum DSM 43021","2930","2","32.65","yes","MSVRQALVPPHLFGRVLGAIRTLLWGLIPLGALAGGLLAGAFGLRAVFMISGCVMLALMVPLCWVLWRHRELINTLREPGTVDT","WP_081453250_2","5.30E-07"
"408","WP_098744376","WP_098744376_2","WP_098744376_2","Micromonospora","none","none","WP_098744376_2","Micromonospora sp. WMMA1996","2890","2","34.06","yes","MSTMTDAAITESAAIELTDVNEVEVVEIEFDELGRFESLSMCCNVAF","WP_098744376_2","none"
"409","SBT66104","SBT66104_2","SBT66104_2","Micromonospora","none","none","SBT66104_2","Micromonospora sediminicola","3091","2","34.06","yes","MSTMTDAAITESAAIELTDVNEVEVVEIEFDELGRFESLSMCCNVAF","SBT66104_2","none"
"410","WP_083603298","WP_083603298_3","WP_083603298_3","Actinomyces","none","none","WP_083603298_3","Actinomyces nasicola","5418","3","1.01","yes","ADSATSRTTGYECSSSLAAWTHQPTLNSEEPVILALFL","WP_083603298_3","none"
"411","OKL53160","OKL53160_3","OKL53160_3","Actinomyces","none","none","OKL53160_3","Actinomyces nasicola","5502","3","1.01","yes","ADSATSRTTGYECSSSLAAWTHQPTLNSEEPVILALFL","OKL53160_3","none"
"412","OUE29606","OUE29606_1","OUE29606_1","Clavibacter","none","none","OUE29606_1","Clavibacter michiganensis","4","1","21.4","yes","ERCTSSRQEPVRQGVRVDAATPLALVLPIADGAAPTPDAVRIAGASEAPAPSTPLMQSVASDPSTEAGS","OUE29606_1","none"
"413","OUE29607","OUE29607_1","OUE29607_1","Clavibacter","none","none","OUE29607_1","Clavibacter michiganensis","1381","1","21.4","yes","ERCTSSRQEPVRQGVRVDAATPLALVLPIADGAAPTPDAVRIAGASEAPAPSTPLMQSVASDPSTEAGS","OUE29607_1","none"
"414","WP_076002756","WP_076002756_3","WP_076002756_3","Gardnerella","none","none","WP_076002756_3","Gardnerella vaginalis","7983","3","9.3","yes","MSKCSNCRKQMQLVSILISVMVPVIAAFAIMELYHLLGVAIAMELILIAWTVVLIKSSK","WP_076002756_3","none"
"415","WP_052038751","WP_052038751_3","WP_052038751_3","Actinomyces","none","none","WP_052038751_3","Actinomyces sp. S4-C9","3907","3","20.4","yes","MINESNSQKQLQLATVMTGVLVPIIMALAILESYYVLGIAIVIELALIVWTVMLVKSTKQNNPPTDQRG","WP_052038751_3","none"
"416","WP_082008308","WP_082008308_2","WP_082008308_2","Microbacterium","none","none","WP_082008308_2","Microbacterium mangrovi","6","2","43.16","no","MTLEPAYWTVDTPWADVGVRRFQTFDRQSSGEIIVIAPGGIVAYSETVPGTILRVVGGRVTLFARDHFTALFCPEGSRVPVPNGYWCRNDSRTRTSLEITHPSGSGTERTRA","WP_082008308_2","none"
"417","KHK96352","KHK96352_2","KHK96352_2","Microbacterium","none","none","KHK96352_2","Microbacterium mangrovi","6","2","43.16","no","MTLEPAYWTVDTPWADVGVRRFQTFDRQSSGEIIVIAPGGIVAYSETVPGTILRVVGGRVTLFARDHFTALFCPEGSRVPVPNGYWCRNDSRTRTSLEITHPSGSGTERTRA","KHK96352_2","none"
"418","WP_035861760","WP_035861760_2","WP_035861760_2","Cryptosporangium","none","none","WP_035861760_2","Cryptosporangium arvum DSM 44712","4798","2","31.26","yes","MKKTETNKVETVKPGKLGKIEIRKLDKIETTSVNSNPSG","WP_035861760_2","none"
"419","EXG81129","EXG81129_2","EXG81129_2","Cryptosporangium","none","none","EXG81129_2","Cryptosporangium arvum DSM 44712","4798","2","31.26","yes","MKKTETNKVETVKPGKLGKIEIRKLDKIETTSVNSNPSG","EXG81129_2","none"
"420","KMT47190","KMT47190_5","KMT47190_5","Gardnerella","Integrase core domain","PF00665.26","KMT47190_5","Gardnerella vaginalis","5402","5","9.49","yes","MLEEALTTLDTTECKSLVIHTDRGGHYRGGRWIERLEGLGITRSMSRKGNSGDNAACEGFFGRMKTEMYYPLNWDSTEELRQAIHTYIDFYNNHRIKERYRGMIAQNV","KMT47190_5","5.20E-13"
"421","WP_080968710","WP_080968710_2","WP_080968710_2","Gardnerella","Integrase core domain","PF13683.6","WP_080968710_2","Gardnerella vaginalis","3317","2","6.33","yes","MHNFFAICYLSRSNWDSTEKLRQAIHTYIDSYNNHRIKMGLKRQLGNIVL","WP_080968710_2","6.00E-07"
"422","SEQ04975","SEQ04975_1","SEQ04975_1","Friedmanniella","none","none","SEQ04975_1","Friedmanniella flava","4779","1","38.85","no","MPLDITLFGWPEVPTTSPLAELGLLIGIPLVVILVVIAVSQGNKMMHESRRGPGPHADDPVWMGGRARSIMGGADDELPAITEGERRALEGSSASGSSSATTSATSESDAGGASARW","SEQ04975_1","none"
"423","WP_091073170","WP_091073170_1","WP_091073170_1","Friedmanniella","none","none","WP_091073170_1","Friedmanniella sagamiharensis","4763","1","55.04","no","MTVSMLVPLDTTLFGWPEVPPTSPLQELGLLVGIPLVVILIVFAVSKGNKVMQESRRGPGPHEDDPVWMGGRARSIMGGADDELPAIAEGERRELEASPRTAGPATAEADAGGASARW","WP_091073170_1","none"
"424","WP_133828511","WP_133828511_2","WP_133828511_2","Actinomycetospora","PspC domain","PF04024.12","WP_133828511_2","Actinomycetospora succinea","5246","2","41.27","no","MATLTRPQYNKVIAGVCAGLAERFGMSAGVVRLLFVLSCLLPGPQFVIYLALWVIMPKR","WP_133828511_2","1.50E-23"
"425","WP_116708219","WP_116708219_2","WP_116708219_2","Actinomycetospora","PspC domain","PF04024.12","WP_116708219_2","Actinomycetospora cinnamomea","5350","2","38.48","no","MATLTRPQHNKVIAGVCAGLAERFGMSAGVVRLLFVLSCLLPGPQFVIYIALWVIMPKAW","WP_116708219_2","1.10E-24"
"426","WP_071042994","WP_071042994_4","WP_071042994_4","Microbacteriaceae","Helix-turn-helix domain","PF12840.7","WP_071042994_4","Microbacteriaceae bacterium","47","4","13.13","yes","MADVYAAIADETRRLLLDELTRHDGQSLFELCARLAMTHGVGSSRQAVSQHLAVLESAGLVSSERVGRTKIHHLHTEPLREIAERWPTPTKE","WP_071042994_4","1.40E-17"
"427","WP_071042996","WP_071042996_5","WP_071042996_5","Microbacteriaceae","Helix-turn-helix domain","PF12840.7","WP_071042996_5","Microbacteriaceae bacterium","1903","5","13.13","yes","MADVYAAIADETRRLLLDELTRHDGQSLFELCARLAMTHGVGSSRQAVSQHLAVLESAGLVSSERVGRTKIHHLHTEPLREIAERWPTPTKE","WP_071042996_5","1.40E-17"
"428","WP_033309246","WP_033309246_2","WP_033309246_2","Streptomyces","none","none","WP_033309246_2","Streptomyces iakyrus","7066","2","17.66","yes","MQTQWVTSDCWLGCGRTGLPVIWLGPVQWDGQHAPFMACADCLARLKAQALAYFMGRQPSAAPEPTPAPPVPAAPYGRPLCASGQVPAATAGFP","WP_033309246_2","none"
"429","WP_107308000","WP_107308000_2","WP_107308000_2","Streptomyces","Probable zinc-ribbon domain","PF11331.8","WP_107308000_2","Streptomyces europaeiscabiei","3968","2","24.14","yes","MERHWVTGDCWLGCRRTSVLVIWLGPVQWDGQHAPFMACEPCLNRLKAQAEKYFIQREPAVA","WP_107308000_2","5.30E-07"
"430","WP_083715657","WP_083715657_2","WP_083715657_2","Amycolatopsis","Transcription factor WhiB","PF02467.16","WP_083715657_2","Amycolatopsis keratiniphila subsp. nogabecina","7766","2","21.39","no","MEMRMAGDLSEAACRGEDPELFFPVTETGPGARQAARAKAVCARCPVVSACLAYAVDNGLAHGVFGGLTGSERRHLIRVGNAA","WP_083715657_2","4.00E-27"
"431","ONF71729","ONF71729_2","ONF71729_2","Amycolatopsis","Transcription factor WhiB","PF02467.16","ONF71729_2","Amycolatopsis keratiniphila subsp. keratiniphila","7828","2","20.36","no","MEMRMAGDLSEAACRGEDPELFFPVTETGPGARQAARAKAVCARCPVVSACLAYAVDNGLAHGVFGGLTGSERRHLIRVGNAA","ONF71729_2","4.00E-27"
"432","WP_079177123","WP_079177123_5","WP_079177123_5","Streptomyces","none","none","WP_079177123_5","Streptomyces sp. MUSC 14","1556","5","15.04","yes","MKPHDARPHSPTRQAPTDHGSTSPPLPSTGLSGIGGQRHTKTSRLQGRADGSGWCRTRGTTGRRYPLAPALQNSRK","WP_079177123_5","none"
"433","OIJ88146","OIJ88146_5","OIJ88146_5","Streptomyces","none","none","OIJ88146_5","Streptomyces sp. MUSC 14","1535","5","15.04","yes","MKPHDARPHSPTRQAPTDHGSTSPPLPSTGLSGIGGQRHTKTSRLQGRADGSGWCRTRGTTGRRYPLAPALQNSRK","OIJ88146_5","none"
"434","EWM17971","EWM17971_2","EWM17971_2","Kutzneria","none","none","EWM17971_2","Kutzneria sp. 744","5774","2","0.45","no","MVHVPGHHHRVVPAEQFDHGDRGLRERGEHKADADERVRKGETSRLWFGEGRLSG","EWM17971_2","none"
"435","WP_084580442","WP_084580442_3","WP_084580442_3","Kutzneria","none","none","WP_084580442_3","Kutzneria sp. 744","5594","3","0.45","no","MVHVPGHHHRVVPAEQFDHGDRGLRERGEHKADADERVRKGETSRLWFGEGRLSG","WP_084580442_3","none"
"436","WP_082373216","WP_082373216_1","WP_082373216_1","Nocardia","none","none","WP_082373216_1","Nocardia sp. NRRL S-836","2238","1","37.79","yes","MLVEALRSGYAVPALLLTFALVTRRVWVGLAQTLRDWVRSAPARRRAGLEEKVVEHALATRSKDQREHYVEMLRLLLDASGRSLPDPPPPDPAPDENPGEGAAHT","WP_082373216_1","none"
"437","WP_090073899","WP_090073899_1","WP_090073899_1","Lentzea","none","none","WP_090073899_1","Lentzea flaviverrucosa","2467","1","5.12","yes","MLTEGTVLAEALRAGYATPVFLVAMALLTRRVWIELALTLREWVRAIPARRRSELERDVVGVALGARSKDQRNHSAELLRLLLNAPERVLPAPPTTDLPPDENPGDSAAHT","WP_090073899_1","none"
"438","WP_089507734","WP_089507734_2","WP_089507734_2","Streptomyces","none","none","WP_089507734_2","Streptomyces sp. NBS 14/10","1669","2","18.92","no","MELDQDELYEIFASPEEIEEAPTDLHATRIADSDFAD","WP_089507734_2","none"
"439","OXL32905","OXL32905_2","OXL32905_2","Streptomyces","none","none","OXL32905_2","Streptomyces sp. NBS 14/10","1276","2","18.92","no","MELDQDELYEIFASPEEIEEAPTDLHATRIADSDFAD","OXL32905_2","none"
"440","AEV84085","AEV84085_1","AEV84085_1","Actinoplanes","none","none","AEV84085_1","Actinoplanes sp. SE50/110","2188","1","21.48","no","MIRDLVRRSLILLLAALGACRRVPPSPVDLPVVATVPVADRTRVLNAQTTVSAGASRAPPAFAV","AEV84085_1","none"
"441","WP_052311581","WP_052311581_1","WP_052311581_1","Actinoplanes","none","none","WP_052311581_1","Actinoplanes sp. SE50","2224","1","21.48","no","MIRDLVRRSLILLLAALGACRRVPPSPVDLPVVATVPVADRTRVLNAQTTVSAGASRAPPAFAV","WP_052311581_1","none"
"442","WP_117401161","WP_117401161_1","WP_117401161_1","Actinomadura","Domain of unknown function (DUF4180)","PF13788.6","WP_117401161_1","Actinomadura sp. LHW52907","5212","1","76.53","yes","MADEMRELGGTQVLVCDPDGPPVATVDDALDLIGAVFLGAEVVAVPASRFDERFFQLGTRFAGEVMQKFVNYRLRLAIVGDITRHVETSSALRALVQESNGAGHVWFVPDLEALTARLRG","WP_117401161_1","1.40E-43"
"443","WP_117401160","WP_117401160_1","WP_117401160_1","Actinomadura","Domain of unknown function (DUF4180)","PF13788.6","WP_117401160_1","Actinomadura sp. LHW52907","6456","1","76.53","yes","MADEMRELGGTQVLVCDPDGPPVATVDDALDLIGAVFLGAEVVAVPASRFDERFFQLGTRFAGEVMQKFVNYRLRLAIVGDITRHVETSSALRALVQESNGAGHVWFVPDLEALTARLRG","WP_117401160_1","1.40E-43"
"444","WP_087454409","WP_087454409_2","WP_087454409_2","Corynebacterium","none","none","WP_087454409_2","Corynebacterium sp. KL0182","4739","2","2.31","yes","MLYFLKVFYQVKAHTTVHRCVIFHNVSLVAHIMRSDAPQP","WP_087454409_2","none"
"445","BAM28031","BAM28031_2","BAM28031_2","Corynebacterium","none","none","BAM28031_2","Corynebacterium ulcerans 0102","5144","2","5.26","yes","MLYFLKVFYQVKAHIILHLCVLLHNVSLVTRVMCNDAPQHS","BAM28031_2","none"
"446","WP_124441159","WP_124441159_2","WP_124441159_2","Streptomyces","none","none","WP_124441159_2","Streptomyces sp. NL15-2K","579","2","4.77","no","MSRLDWGGDVSLGFYLERPFYLSVALVTCSPNLAHPELACPVTA","WP_124441159_2","none"
"447","GCB48186","GCB48186_2","GCB48186_2","Streptomyces","none","none","GCB48186_2","Streptomyces sp. NL15-2K","696","2","4.77","no","MSRLDWGGDVSLGFYLERPFYLSVALVTCSPNLAHPELACPVTA","GCB48186_2","none"
"448","WP_123307848","WP_123307848_1","WP_123307848_1","Cellulomonas","Cupin domain","PF07883.11","WP_123307848_1","Cellulomonas sp. PhB143","3880","1","65.05","no","MTRLDRSAADHLEQALVDAHGRSSEIVVHDGPLRQSVLALAAGTVLGEHNAPPAASLYVIEGRVRVTAASGDVEVGADELVPITHERHGVEALEDCVFLLTTVTSVPKD","WP_123307848_1","3.50E-07"
"449","ROS76630","ROS76630_1","ROS76630_1","Cellulomonas","Cupin domain","PF07883.11","ROS76630_1","Cellulomonas sp. PhB143","3880","1","65.05","no","MTRLDRSAADHLEQALVDAHGRSSEIVVHDGPLRQSVLALAAGTVLGEHNAPPAASLYVIEGRVRVTAASGDVEVGADELVPITHERHGVEALEDCVFLLTTVTSVPKD","ROS76630_1","3.50E-07"
"450","WP_075973981","WP_075973981_1","WP_075973981_1","Actinokineospora","none","none","WP_075973981_1","Actinokineospora bangkokensis","5001","1","54.57","no","MSEAPATPGGDTPSTRDLAEIPSVEVISRSALMLMSAAAERLGLADPDPDTSPHRDLDEARRLITALAGLVTAAAEYLGPHAAPIRDGLQSLQRAFRESSAIPDAPGQGPGEKYTGPVY","WP_075973981_1","none"
"451","EWC60518","EWC60518_1","EWC60518_1","Actinokineospora","none","none","EWC60518_1","Actinokineospora spheciospongiae","7181","1","56.49","no","MSEASATPGDTQSNTRELADIPSVEVISRSALMLMSAAAERLGLADADPDTSPHRDLDEARRLITALAGLVTASAEYLGPHAAPIRDGLQGLQKAFREGSAFPDAPGQGPGEKFTGPVY","EWC60518_1","none"
"452","WP_131785730","WP_131785730_2","WP_131785730_2","Frankia","Helix-turn-helix domain","PF12728.7","WP_131785730_2","Frankia symbiont of Coriaria ruscifolia","3174","2","29.89","yes","MATTRAPQTAPLLTPAEVATMFRVDPKTVTRWAKAGKLTSIRTLGGHRRYQEAEVRALLTGIPARDDTA","WP_131785730_2","3.00E-14"
"453","WP_131785729","WP_131785729_2","WP_131785729_2","Frankia","Helix-turn-helix domain","PF12728.7","WP_131785729_2","Frankia symbiont of Coriaria ruscifolia","4521","2","29.89","yes","MATTRAPQTAPLLTPAEVATMFRVDPKTVTRWAKAGKLTSIRTLGGHRRYQEAEVRALLTGIPARDDTA","WP_131785729_2","3.00E-14"
"454","ORA12704","ORA12704_1","ORA12704_1","Mycobacterium","Proteins of 100 residues with WXG","PF06013.12","ORA12704_1","Mycobacterium angelicum","7210","1","31.83","no","MTINYHFGDVDAHGATIRAQAASLEAEHQAIVRDVLVAGDFWGGAGSVACQAFITQLGRNFQVIYEQANIHGQQVQTAGSNMASTDSAVGSGWA","ORA12704_1","5.10E-17"
"455","WP_083115866","WP_083115866_1","WP_083115866_1","Mycobacterium","Proteins of 100 residues with WXG","PF06013.12","WP_083115866_1","Mycobacterium angelicum","7204","1","31.83","no","MTINYHFGDVDAHGATIRAQAASLEAEHQAIVRDVLVAGDFWGGAGSVACQAFITQLGRNFQVIYEQANIHGQQVQTAGSNMASTDSAVGSGWA","WP_083115866_1","5.10E-17"
"456","WP_093610459","WP_093610459_2","WP_093610459_2","Actinoplanes","none","none","WP_093610459_2","Actinoplanes philippinensis","3519","2","30.31","yes","MNEKKNARGLMRRLRVAVVVAVAAGFVAGAVSTAAPAQANGGTGCCIGLPN","WP_093610459_2","none"
"457","PWK29583","PWK29583_3","PWK29583_3","Actinoplanes","none","none","PWK29583_3","Actinoplanes xinjiangensis","3517","3","29.4","yes","MNEKKSTRGPKNRLRLAVVLVATASFVAGAVSVGAPAQASGGTGCCIGLPK","PWK29583_3","none"
"458","WP_077692191","WP_077692191_1","WP_077692191_1","Nocardiopsis","none","none","WP_077692191_1","Nocardiopsis sinuspersici","1220","1","41.3","no","MAATPPVPGYDDLSVEELRERLLSLSAEQVRELIGYEESHANRMDALELLEDRLNGLTAGDEIPEGAGPEGGPDPEDEAHAEAVPQSAERPPPDRRTERS","WP_077692191_1","none"
"459","WP_073704754","WP_073704754_2","WP_073704754_2","Nocardiopsis","none","none","WP_073704754_2","Nocardiopsis sp. TSRI0078","1179","2","38.34","no","MSAATPPLPDYDDLSVGQLRERVRSLPAEQVRALIGYEESHADRMEVLELLKDRLDGLTEGDEIPGGPGPEDGPDPEDDACADVAPDRRTERS","WP_073704754_2","none"
"460","WP_107778338","WP_107778338_1","WP_107778338_1","Nocardioides","none","none","WP_107778338_1","Nocardioides sp. CF167","4115","1","83.83","no","MKKTTLGLGSIVLAAAFSLTACGTNEGELAKEYCGLLEDVNAATESGDADKIQKASEAVNDWIKKNEDVEGDEDEFTDAVNDECGDIAKLP","WP_107778338_1","none"
"461","WP_107778339","WP_107778339_1","WP_107778339_1","Nocardioides","none","none","WP_107778339_1","Nocardioides sp. CF167","2919","1","83.83","no","MKKTTLGLGSIVLAAAFSLTACGTNEGELAKEYCGLLEDVNAATESGDADKIQKASEAVNDWIKKNEDVEGDEDEFTDAVNDECGDIAKLP","WP_107778339_1","none"
"462","EMF02011","EMF02011_2","EMF02011_2","Streptomyces","Phage integrase family","PF00589.22","EMF02011_2","Streptomyces mobaraensis NBRC 13819 = DSM 40847","6971","2","18.61","yes","MLPWAWAPGEVQAFLAAAGGEGHRRFFAALLLSLMGLRPAEVCGLRREDADLEAETSNVANARTLSGNRRGSG","EMF02011_2","8.10E-09"
"463","WP_040887728","WP_040887728_2","WP_040887728_2","Streptomyces","Phage integrase family","PF00589.22","WP_040887728_2","Streptomyces mobaraensis NBRC 13819 = DSM 40847","6971","2","18.61","yes","MLPWAWAPGEVQAFLAAAGGEGHRRFFAALLLSLMGLRPAEVCGLRREDADLEAETSNVANARTLSGNRRGSG","WP_040887728_2","8.10E-09"
"464","WP_037658204","WP_037658204_1","WP_037658204_1","Streptomyces","none","none","WP_037658204_1","Streptomyces aurantiacus JA 4570","3338","1","7.1","yes","MPENSSATPEGTSTTPTVSERAASAEHLGLSQHELDELLQDNDSYVSFAAHAHC","WP_037658204_1","none"
"465","WP_058846818","WP_058846818_1","WP_058846818_1","Streptomyces","none","none","WP_058846818_1","Streptomyces silvensis","3341","1","7.21","yes","MPESSSATSEGTSTASAVSRPAAPAEHLGLSQHELDELLQDNDSYVSFAAHAHC","WP_058846818_1","none"
"466","EFF80328","EFF80328_3","EFF80328_3","Schaalia","Protein of unknown function (DUF3995)","PF13160.6","EFF80328_3","Schaalia odontolytica F0309","264","3","8.88","yes","MAVLYTGYSTVVLALDAPNGALSSVMWIVGGLTLLMTLASSLRVRRKQSLLWPAWTALLGVIVGFVVLSILH","EFF80328_3","1.50E-06"
"467","WP_082163142","WP_082163142_3","WP_082163142_3","Kytococcus","Protein of unknown function (DUF3995)","PF13160.6","WP_082163142_3","Kytococcus sedentarius","264","3","8.88","yes","MAVLYTGYSTVVLALDAPNGALSSVMWIVGGLTLLMTLASSLRVRRKQSLLWPAWTALLGVIVGFVVLSILH","WP_082163142_3","1.50E-06"
"468","OUE27580","OUE27580_3","OUE27580_3","Clavibacter","none","none","OUE27580_3","Clavibacter michiganensis","6045","3","2.01","yes","MGSDATTLYLGRNKAARVIQTEMRSSAPLIGTRSWKW","OUE27580_3","none"
"469","OUE27579","OUE27579_3","OUE27579_3","Clavibacter","none","none","OUE27579_3","Clavibacter michiganensis","7388","3","2.01","yes","MGSDATTLYLGRNKAARVIQTEMRSSAPLIGTRSWKW","OUE27579_3","none"
"470","SEH00207","SEH00207_9005","SEH00207_9005","Nonomuraea","lasso_albusnod: albusnodin family lasso peptide","NF033525.2","SEH00207_9005","Nonomuraea solani","11003","9005","24.09","yes","MEKRKYEPPMLFKLGDAVELTLSGNCCDTADKGAYYW","SEH00207_9005","4.30E-06"
"471","SEH00212","SEH00212_3","SEH00212_3","Nonomuraea","lasso_leader_L3: lasso RiPP family leader peptide","NF033521.1","SEH00212_3","Nonomuraea solani","4861","3","24.09","yes","MEKRKYEPPMLFKLGDAVELTLSGNCCDTADKGAYYW","SEH00212_3","7.70E-11"
"472","WP_132186409","WP_132186409_3","WP_132186409_3","Micromonospora","none","none","WP_132186409_3","Micromonospora sp. KC606","12","3","11.25","yes","MTIDTLALHTPTPKESQPWTR","WP_132186409_3","none"
"473","WP_132186408","WP_132186408_3","WP_132186408_3","Micromonospora","none","none","WP_132186408_3","Micromonospora sp. KC606","1373","3","11.25","yes","MTIDTLALHTPTPKESQPWTR","WP_132186408_3","none"
"474","WP_030288747","WP_030288747_5","WP_030288747_5","Streptomyces","none","none","WP_030288747_5","Streptomyces viridifaciens","1043","5","12.41","yes","MGNSQHHPLSGDGREGEQPLRRLLKSVLGSAPAPIPDLSDEELVAEVRKASAEGGPERGSR","WP_030288747_5","none"
"475","OJH69022","OJH69022_5","OJH69022_5","Streptomyces","none","none","OJH69022_5","Streptomyces viridifaciens","1100","5","12.41","yes","MGNSQHHPLSGDGREGEQPLRRLLKSVLGSAPAPIPDLSDEELVAEVRKASAEGGPERGSR","OJH69022_5","none"
"476","WP_093264055","WP_093264055_2","WP_093264055_2","Thermostaphylospora","none","none","WP_093264055_2","Thermostaphylospora chromogena","298","2","19.25","yes","MSNSSTPTAAPDTLDLLVDDIEEDLFANRESNMPCFGSATSFSYHPENTAS","WP_093264055_2","none"
"477","SDR04557","SDR04557_2","SDR04557_2","Thermostaphylospora","none","none","SDR04557_2","Thermostaphylospora chromogena","130","2","19.25","yes","MSNSSTPTAAPDTLDLLVDDIEEDLFANRESNMPCFGSATSFSYHPENTAS","SDR04557_2","none"
"478","WP_116154877","WP_116154877_8","WP_116154877_8","Streptomyces","none","none","WP_116154877_8","Streptomyces sp. 3212.4","5190","8","8.83","no","MVTRRPSSRTSVTSLPGGSELMISVRVAHSNSARRISNSMRRLSDHVLSQTYPSRNAEAATPQPAVTVTGSMVPPIFCLDGASRAPRHLLKT","WP_116154877_8","none"
"479","RED74809","RED74809_8","RED74809_8","Streptomyces","none","none","RED74809_8","Streptomyces sp. 67","5190","8","8.49","no","MVTRRPSSRTSVTSLPGGSELMISVRVAHSNSARRISNSMRRLSDHVLSQTYPSRNAEAATPQPAVTVTGSMVPPIFCLDGASRAPRHLLKT","RED74809_8","none"
"480","WP_081476164","WP_081476164_1","WP_081476164_1","Verrucosispora","none","none","WP_081476164_1","Verrucosispora maris","1364","1","45.99","yes","MKGITDLELSAEKPATMIAANGNYALVAGKGNIARLRTSPQSTMLSAESAAALMAPLS","WP_081476164_1","none"
"481","AEB46035","AEB46035_1","AEB46035_1","Verrucosispora","none","none","AEB46035_1","Verrucosispora maris AB-18-032","1364","1","45.99","yes","MKGITDLELSAEKPATMIAANGNYALVAGKGNIARLRTSPQSTMLSAESAAALMAPLS","AEB46035_1","none"
"482","WP_020759490","WP_020759490_1","WP_020759490_1","Gardnerella","none","none","WP_020759490_1","Gardnerella vaginalis JCP7672","70","1","12.27","yes","MGRTRTEHSTPHLTSMSDFFVGEIPDDDEN","WP_020759490_1","none"
"483","WP_076002756","WP_076002756_2","WP_076002756_2","Gardnerella","none","none","WP_076002756_2","Gardnerella vaginalis","69","2","12.63","yes","MGRTGTEHSTPHLTSMSDFFVGEIPDDDEN","WP_076002756_2","none"
"484","ERS23150","ERS23150_3","ERS23150_3","Propionibacterium","none","none","ERS23150_3","Propionibacterium sp. KPL2005","2950","3","11.71","no","MPPDYPTRVTNLTVLDLALDLRLEVARCNAEMAETTRVINRLNWAVAETAWAQGTPEEIGPEAICADIEARLIEDHPELR","ERS23150_3","none"
"485","WP_080564860","WP_080564860_1","WP_080564860_1","Cutibacterium","none","none","WP_080564860_1","Cutibacterium avidum","2950","1","18.4","no","HPARGMPPDYPTRVTNLTVLDLALDLRLEVARCNAEMAETTRVINRLNWAVAETAWAQGTPEEIGPEAICADIEARLIEDHPELR","WP_080564860_1","none"
"486","OLF11310","OLF11310_2","OLF11310_2","Actinophytocola","none","none","OLF11310_2","Actinophytocola xanthii","1794","2","32.48","yes","MGEITTLLAATEDEALAASGAMDVDLGEAVANSIVVGAPAGV","OLF11310_2","none"
"487","OLF11310","OLF11310_1","OLF11310_1","Actinophytocola","none","none","OLF11310_1","Actinophytocola xanthii","6644","1","33.56","yes","MVDITTLLAATNDEALSASGASDVDFGVCPANSLVCGGNTGG","OLF11310_1","none"
"488","SFO40826","SFO40826_2","SFO40826_2","Saccharopolyspora","none","none","SFO40826_2","Saccharopolyspora antimicrobica","6760","2","5.54","yes","MRNVELVERLQVDLLRVTSAACTPVRD","SFO40826_2","none"
"489","WP_093357236","WP_093357236_1","WP_093357236_1","Saccharopolyspora","none","none","WP_093357236_1","Saccharopolyspora hirsuta","6727","1","4.63","yes","MRNVELVERLQVDLLRVTSAACTPVRG","WP_093357236_1","none"
"490","WP_026407791","WP_026407791_2","WP_026407791_2","Actinomyces","none","none","WP_026407791_2","Actinomyces gerencseriae DSM 6844","2957","2","9.78","yes","MTIVLDRPRPAPSRPARPSEGPPRAAAGRRAETVPTAAEPVAATAAAPVVVRGVRQSYGGREVLRGVDLVVERGSFHG","WP_026407791_2","none"
"491","WP_051268851","WP_051268851_4","WP_051268851_4","Actinomyces","none","none","WP_051268851_4","Actinomyces gerencseriae DSM 6844","7254","4","10.02","yes","MQPVVVRGVRQSYGGREVLRGVDLVVERGSFHG","WP_051268851_4","none"
"492","AGC62644","AGC62644_2","AGC62644_2","Mycobacterium","Protein of unknown function (DUF732)","PF05305.14","AGC62644_2","Mycobacterium liflandii 128FXT","7124","2","25.63","no","MSARHWLAACTAPVAVGAALVFGTAVATADATDDAFLAQMHKLGFTWPAGDDSDIVSTGHQICADRMSGKTPDAIAQDIHTTLGEKGITFADVTSMVSAAESTYCSD","AGC62644_2","2.00E-20"
"493","CDM77002","CDM77002_1","CDM77002_1","Mycobacterium","Protein of unknown function (DUF732)","PF05305.14","CDM77002_1","Mycobacterium marinum E11","5750","1","26.26","no","MSARHWLAACTAPVAVGAALVFGTAVATADATDDAFLAQMHKLGFTWPAGDDSDIVSMGHQICADRMSGKTPDAIAQDIHTTLGEKGITFADVTSMVSAAESTYCSD","CDM77002_1","8.00E-21"
"494","AJT41785","AJT41785_3","AJT41785_3","Psychromicrobium","Gag protein p6","PF08705.11","AJT41785_3","Psychromicrobium lacuslunae","5698","3","7.13","yes","MALLDKEINDSKPISRGAPAELVRMGREIGAISRGAPAELVRMGREIGAISRGAPAELVRMGREIGAIPTSSHDSYLTAGPSEAWGHPEGP","AJT41785_3","0.0015"
"495","WP_082057091","WP_082057091_3","WP_082057091_3","Psychromicrobium","Gag protein p6","PF08705.11","WP_082057091_3","Psychromicrobium lacuslunae","5698","3","7.13","yes","MALLDKEINDSKPISRGAPAELVRMGREIGAISRGAPAELVRMGREIGAISRGAPAELVRMGREIGAIPTSSHDSYLTAGPSEAWGHPEGP","WP_082057091_3","0.0015"
"496","WP_038682890","WP_038682890_1","WP_038682890_1","Pimelobacter","YjbR","PF04237.13","WP_038682890_1","Pimelobacter simplex","6490","1","56.16","no","MLALGSELERSYPVHVRRRLKFRVGQIVYVAFSLDEQVMGFAFPKDERDALVGGAPDKFALPAASDLRYSWVHAHLAALDPVEARELVVDAWRMVVPQKLARAYDLTHPHGPGEP","WP_038682890_1","1.70E-10"
"497","WP_086845754","WP_086845754_1","WP_086845754_1","Amycolatopsis","YjbR","PF04237.13","WP_086845754_1","Amycolatopsis kentuckyensis","455","1","74.18","yes","MVTGADVRAFAATLPRAYEAIVRDRIKFRVGQIVFVALSADETLMGFAFPREQREALIAAEPGKFLLPEPADLRFRWIRCRLAAIDEAEMRELVVEAWRMCVPKKVSTAYLETHPL","WP_086845754_1","1.20E-12"
"498","WP_121005579","WP_121005579_1","WP_121005579_1","Saccharothrix","none","none","WP_121005579_1","Saccharothrix australiensis","3378","1","26.72","yes","MAKKSTPRDGCGHRRGVRGGGGYTAVFETPAAQEKGKSLFVRVRALLTSLSR","WP_121005579_1","none"
"499","RKT54190","RKT54190_1","RKT54190_1","Saccharothrix","none","none","RKT54190_1","Saccharothrix australiensis","3450","1","26.72","yes","MAKKSTPRDGCGHRRGVRGGGGYTAVFETPAAQEKGKSLFVRVRALLTSLSR","RKT54190_1","none"
"500","WP_079180155","WP_079180155_2","WP_079180155_2","Mycobacterium","none","none","WP_079180155_2","Mycobacterium tuberculosis","19","2","7.95","yes","MEHLFEIFHVNSNNFPSQSAHCPNHI","WP_079180155_2","none"
"501","SGI74060","SGI74060_2","SGI74060_2","Mycobacterium","none","none","SGI74060_2","Mycobacterium tuberculosis","19","2","7.95","yes","MEHLFEIFHVNSNNFPSQSAHCPNHI","SGI74060_2","none"
"502","WP_007495061","WP_007495061_3","WP_007495061_3","Streptomyces","none","none","WP_007495061_3","Streptomyces zinciresistens K42","5031","3","37.71","yes","MVDTTPLTRAVDHFADRLRAAPQSRLQRGGAPEALALARELTRWAQRLEAPDAEPREMPDAGMFAAADQITVAVHDLALVLTEDGEVEDAVRLVREAQKRAGV","WP_007495061_3","none"
"503","WP_028441277","WP_028441277_3","WP_028441277_3","Streptomyces","none","none","WP_028441277_3","Streptomyces sp. DpondAA-D4","7696","3","42.12","no","MLDTTPLITAVERFADRLRSAPQSRLSRGLAADALATARELAARAQRIEAPDREPRVLPDAGMFAVGDQLAVAGRDLAMALETASPQELDEAVRCVEEAAERAFAR","WP_028441277_3","none"
"504","SEQ04975","SEQ04975_2","SEQ04975_2","Friedmanniella","none","none","SEQ04975_2","Friedmanniella flava","1370","2","29.41","yes","MEHVPSDHGRRPHHVHAERELWPRDFGRDGVSGLVTLDRALRARDVSRPTMADELEAAEVVDGLLARVDGRRPRAYAR","SEQ04975_2","none"
"505","WP_091073170","WP_091073170_2","WP_091073170_2","Friedmanniella","none","none","WP_091073170_2","Friedmanniella sagamiharensis","1408","2","11.16","yes","MDHVPSDHGRRAHHPHADRDLFPRDFGRDGASGLVTLDRAMRARDVSRPTMADELEAAEVVDSLLARVDGRRARAYAR","WP_091073170_2","none"
"506","WP_082128669","WP_082128669_3","WP_082128669_3","Dermacoccus","none","none","WP_082128669_3","Dermacoccus sp. PE3","6557","3","13.83","no","MAGNDGPIAVDTMRSRSVSRSVLRYGNSGVLWLVNARNLASALREETIAQARPAWCVPTTVGVLAQIVNGEGLCRVVVTPHVVAETRGAARRSTPVL","WP_082128669_3","none"
"507","KLO64220","KLO64220_5","KLO64220_5","Dermacoccus","none","none","KLO64220_5","Dermacoccus sp. PE3","6557","5","13.83","no","MAGNDGPIAVDTMRSRSVSRSVLRYGNSGVLWLVNARNLASALREETIAQARPAWCVPTTVGVLAQIVNGEGLCRVVVTPHVVAETRGAARRSTPVL","KLO64220_5","none"
"508","WP_112443341","WP_112443341_1","WP_112443341_1","Streptomyces","Putative transposase of IS4/5 family (DUF4096)","PF13340.6","WP_112443341_1","Streptomyces sp. ZFG47","7838","1","13.85","yes","MTDLVERLVPDELWVLFRRVVPPTEVIRPQGGGRRRAGDREALAAIIFVATSGCTWRQLPPVFGPSWQTVYRRFARWSRARVWARLHRVILDELGACGELDWSRCAIDSVSVRAAKGGH","WP_112443341_1","1.70E-27"
"509","WP_134664144","WP_134664144_4","WP_134664144_4","Streptomyces","Putative transposase of IS4/5 family (DUF4096)","PF13340.6","WP_134664144_4","Streptomyces sp. S501","7040","4","17.13","yes","MVGIVERLVPDELWELFQRVVPEAPSRPQGGGRRRHGDREVLAAIVFVATSGCTWQQLPSASFGPSGATAHRRFSEWSKARVWAQLHRMVLDELGARGELDWSRCAIDSVNMRALKRGI","WP_134664144_4","3.40E-27"
"510","WP_107094495","WP_107094495_1","WP_107094495_1","Streptomyces","Zn-finger in ubiquitin-hydrolases and other prote","PF02148.19","WP_107094495_1","Streptomyces sp. XY431","6827","1","68.95","yes","MDDDQQDQGIDPSVPPSGDGCVECLAGDGPGWWLHLRRCAACGHIGCCDSSPSQHGTRHARAAGHPFLASFEPGEEWFWNIETEQYYEGPELAAPAAHPLTQPTPGPLGKVPADWQLHLH","WP_107094495_1","1.60E-13"
"511","KOV37396","KOV37396_1","KOV37396_1","Streptomyces","Zn-finger in ubiquitin-hydrolases and other prote","PF02148.19","KOV37396_1","Streptomyces sp. XY431","7295","1","68.95","yes","MDDDQQDQGIDPSVPPSGDGCVECLAGDGPGWWLHLRRCAACGHIGCCDSSPSQHGTRHARAAGHPFLASFEPGEEWFWNIETEQYYEGPELAAPAAHPLTQPTPGPLGKVPADWQLHLH","KOV37396_1","1.60E-13"
"512","WP_057611617","WP_057611617_2","WP_057611617_2","Streptomyces","none","none","WP_057611617_2","Streptomyces sp. Root369","3990","2","49.42","yes","MMDAHELEAESAELLPGREALGRLKFSFNKTTNVTKHIANVEAHNSSLAVNDHSFASAAASSAGQSITVTQ","WP_057611617_2","none"
"513","WP_057611617","WP_057611617_1","WP_057611617_1","Streptomyces","none","none","WP_057611617_1","Streptomyces sp. Root369","4258","1","64.99","yes","MSMDMHELETESAELLPGREALGRLKFSFNKTTNVTKHIANIQADNQSAALNDHSSYSVAESQASQSIVVKQ","WP_057611617_1","none"
"514","WP_035849418","WP_035849418_5","WP_035849418_5","Cryptosporangium","none","none","WP_035849418_5","Cryptosporangium arvum DSM 44712","2357","5","8.39","no","MDAPVCQKDSDGAVPRAGARGTAVGPGQCAQANGFATSALVPTPCSADITTGSCTSSNANGLVTSALVPGPCRADMTTGSSMGSNENDSMGGSSL","WP_035849418_5","none"
"515","WP_035849420","WP_035849420_8","WP_035849420_8","Cryptosporangium","none","none","WP_035849420_8","Cryptosporangium arvum DSM 44712","3709","8","8.39","no","MDAPVCQKDSDGAVPRAGARGTAVGPGQCAQANGFATSALVPTPCSADITTGSCTSSNANGLVTSALVPGPCRADMTTGSSMGSNENDSMGGSSL","WP_035849420_8","none"
"516","OIJ88146","OIJ88146_2","OIJ88146_2","Streptomyces","none","none","OIJ88146_2","Streptomyces sp. MUSC 14","3330","2","22.86","yes","MKRLTLAATAAVITVLPVPHASAVPTRQPCTAHWRVTATVALRRPTADEVVATVHSPVVRYLHAGDHIISCSLAVGRDGEHAYRDCGGGSEWAVVRGPRGGQMPSACLRRA","OIJ88146_2","none"
"517","WP_079177123","WP_079177123_2","WP_079177123_2","Streptomyces","none","none","WP_079177123_2","Streptomyces sp. MUSC 14","3330","2","22.86","yes","MKRLTLAATAAVITVLPVPHASAVPTRQPCTAHWRVTATVALRRPTADEVVATVHSPVVRYLHAGDHIISCSLAVGRDGEHAYRDCGGGSEWAVVRGPRGGQMPSACLRRA","WP_079177123_2","none"
"518","KZE98020","KZE98020_1","KZE98020_1","Rhodococcus","none","none","KZE98020_1","Rhodococcus sp. EPR-147","1988","1","30.25","no","MAENSDAAQARVFADMLTAEIAAASSRVEESEQLARKALRVGDSRSHVWHSDEAQTQKQALYELYRQLDALRNRFPTVHSGS","KZE98020_1","none"
"519","WP_045196822","WP_045196822_1","WP_045196822_1","Rhodococcus","none","none","WP_045196822_1","Rhodococcus sp. B7740","1987","1","31.59","no","MAENSDAAQARVFADMLTAEIAAASSRIEDSEQLARKALRVGDSRSHVWHSDEAQTQKQSLYELHRQLDALRNRFPAVHRP","WP_045196822_1","none"
"520","WP_075410821","WP_075410821_1","WP_075410821_1","Actinomyces","none","none","WP_075410821_1","Actinomyces oris","3367","1","3.26","no","MDIAPKLQRNLTDALHKMPGVQECQTDRELTILGPQYEEITLDQQQSSAVLHWM","WP_075410821_1","none"
"521","WP_081384789","WP_081384789_2","WP_081384789_2","Actinomyces","none","none","WP_081384789_2","Actinomyces oris","323","2","3.26","no","MDIAPKLQRNLTDALHKMPGVQECQTDRELTILGPQYEEITLDQQQSSAVLHWM","WP_081384789_2","none"
"522","PWF27333","PWF27333_1","PWF27333_1","Ancrocorticia","none","none","PWF27333_1","Ancrocorticia populi","1342","1","9.85","no","MLDDVPGVFGDGMANFSDRDLTIKERGHLLEQGIGTLSRDLESGARIRDQ","PWF27333_1","none"
"523","WP_133246044","WP_133246044_1","WP_133246044_1","Ancrocorticia","none","none","WP_133246044_1","Ancrocorticia populi","1318","1","9.85","no","MLDDVPGVFGDGMANFSDRDLTIKERGHLLEQGIGTLSRDLESGARIRDQ","WP_133246044_1","none"
"524","WP_123292376","WP_123292376_3","WP_123292376_3","Curtobacterium","none","none","WP_123292376_3","Curtobacterium sp. PhB78","721","3","0.97","yes","MVRLEALVVAFKDPRRAERLRQVLCDRD","WP_123292376_3","none"
"525","ROS45991","ROS45991_3","ROS45991_3","Curtobacterium","none","none","ROS45991_3","Curtobacterium sp. PhB78","721","3","0.97","yes","MVRLEALVVAFKDPRRAERLRQVLCDRD","ROS45991_3","none"
"526","RED74809","RED74809_4","RED74809_4","Streptomyces","none","none","RED74809_4","Streptomyces sp. 67","5454","4","28.09","no","MSLHSVSGELMVRGLDDLDEELPVVSFNGPGDYRLRIHARGRDTTIDLAPDEITEWYLIQAWPAPAQDATVLRQTDSYGASVRAH","RED74809_4","none"
"527","WP_116154877","WP_116154877_4","WP_116154877_4","Streptomyces","none","none","WP_116154877_4","Streptomyces sp. 3212.4","5493","4","25.82","no","MSLHSVSGELMVRGLDDLDEELPVVSFNGPGDYRLRIHARGRDTTIDLAPDEITEWYLIQAWPAPAQDATVLRQTDSYGASVRAH","WP_116154877_4","none"
"528","SFR28131","SFR28131_1","SFR28131_1","Lentzea","Protein of unknown function (DUF2933)","PF11666.8","SFR28131_1","Lentzea waywayandensis","6861","1","35.82","yes","MKRQHLGLYAIALAILIVGLAFAGVPLQTMLFGLFVLACPLMMMFMMRGHGGGSDQEKQDHHTTGHRDG","SFR28131_1","3.80E-12"
"529","WP_093603934","WP_093603934_1","WP_093603934_1","Lentzea","Protein of unknown function (DUF2933)","PF11666.8","WP_093603934_1","Lentzea waywayandensis","6861","1","35.82","yes","MKRQHLGLYAIALAILIVGLAFAGVPLQTMLFGLFVLACPLMMMFMMRGHGGGSDQEKQDHHTTGHRDG","WP_093603934_1","3.80E-12"
"530","WP_091051455","WP_091051455_2","WP_091051455_2","Glycomyces","Helix-turn-helix domain","PF12840.7","WP_091051455_2","Glycomyces sambucus","4911","2","60.05","no","MSRTIELTLTDVTTGHSDDSVIEHAKNLAPQFKALADENRLAIVLLLSEHSRTVRELTDATGLAQTLVSHHLAPLRELGLVSVTPKGRSNVYSLCCEAFSAPLRALAGLSTPVEDTCCD","WP_091051455_2","1.00E-12"
"531","SDL22458","SDL22458_2","SDL22458_2","Glycomyces","Helix-turn-helix domain","PF12840.7","SDL22458_2","Glycomyces sambucus","4902","2","60.05","no","MSRTIELTLTDVTTGHSDDSVIEHAKNLAPQFKALADENRLAIVLLLSEHSRTVRELTDATGLAQTLVSHHLAPLRELGLVSVTPKGRSNVYSLCCEAFSAPLRALAGLSTPVEDTCCD","SDL22458_2","1.00E-12"
"532","WP_083191919","WP_083191919_4","WP_083191919_4","Streptomyces","none","none","WP_083191919_4","Streptomyces violaceoruber","3327","4","14.57","no","MLRRPGAAEEWARLARVFDALPLREQRAATRRGAETGECWAVVLEGPTTPRPELTVMRVTPA","WP_083191919_4","none"
"533","KOG82578","KOG82578_5","KOG82578_5","Streptomyces","none","none","KOG82578_5","Streptomyces griseus subsp. rhodochrous","3499","5","14.57","no","MLRRPGAAEEWARLARVFDALPLREQRAATRRGAETGECWAVVLEGPTTPRPELTVMRVTPA","KOG82578_5","none"
"534","WP_083296694","WP_083296694_2","WP_083296694_2","Rothia","none","none","WP_083296694_2","Rothia sp. HMSC065G12","3470","2","1.31","yes","MPKNPRRKLQGCIITIIGKAALIILRPVVSSSSQVKLFLA","WP_083296694_2","none"
"535","OFK71393","OFK71393_3","OFK71393_3","Rothia","none","none","OFK71393_3","Rothia sp. HMSC065G12","3470","3","1.31","yes","MPKNPRRKLQGCIITIIGKAALIILRPVVSSSSQVKLFLA","OFK71393_3","none"
"536","WP_071042994","WP_071042994_2","WP_071042994_2","Microbacteriaceae","none","none","WP_071042994_2","Microbacteriaceae bacterium","2880","2","32.71","no","MLRIWSRFEVAVRTRIADALEDETGDVPGWVLITLMTAGLVVVIWALAGPALAGLFEQAINRVSGL","WP_071042994_2","none"
"537","WP_071042996","WP_071042996_2","WP_071042996_2","Microbacteriaceae","none","none","WP_071042996_2","Microbacteriaceae bacterium","4736","2","32.71","no","MLRIWSRFEVAVRTRIADALEDETGDVPGWVLITLMTAGLVVVIWALAGPALAGLFEQAINRVSGL","WP_071042996_2","none"
"538","ONI88739","ONI88739_1","ONI88739_1","Actinosynnema","none","none","ONI88739_1","Actinosynnema sp. ALI-1.44","5087","1","5.32","yes","MKATGFAVAAIVADDRDDLFFWHLTCAVSP","ONI88739_1","none"
"539","WP_083752781","WP_083752781_1","WP_083752781_1","Actinosynnema","none","none","WP_083752781_1","Actinosynnema sp. ALI-1.44","5078","1","5.32","yes","MKATGFAVAAIVADDRDDLFFWHLTCAVSP","WP_083752781_1","none"
"540","WP_077689962","WP_077689962_2","WP_077689962_2","Nocardiopsis","Helix-turn-helix domain","PF12840.7","WP_077689962_2","Nocardiopsis sinuspersici","6448","2","54.24","yes","MLMSVDADVIKAVADPLRLRIVALLARETLCTTHLMDETGARQTNLSNHLRVLREAGVVETEPCGRYTYYRLRPESLESLSGALAELARTARSADAHENRRPC","WP_077689962_2","8.10E-18"
"541","OOC53575","OOC53575_2","OOC53575_2","Nocardiopsis","Helix-turn-helix domain","PF12840.7","OOC53575_2","Nocardiopsis sinuspersici","6448","2","54.24","yes","MLMSVDADVIKAVADPLRLRIVALLARETLCTTHLMDETGARQTNLSNHLRVLREAGVVETEPCGRYTYYRLRPESLESLSGALAELARTARSADAHENRRPC","OOC53575_2","8.10E-18"
"542","OIJ88146","OIJ88146_6","OIJ88146_6","Streptomyces","none","none","OIJ88146_6","Streptomyces sp. MUSC 14","3722","6","13.57","yes","MGSVDVAHIFDELVEMQKSADKARGRVLELRDTYGPPTTTPVATAGPSLRGGLAELAGPDRKVQEAITTHASKEGTPCCDVEAAVRAEARRPEPELASA","OIJ88146_6","none"
"543","WP_079177123","WP_079177123_6","WP_079177123_6","Streptomyces","none","none","WP_079177123_6","Streptomyces sp. MUSC 14","3722","6","13.57","yes","MGSVDVAHIFDELVEMQKSADKARGRVLELRDTYGPPTTTPVATAGPSLRGGLAELAGPDRKVQEAITTHASKEGTPCCDVEAAVRAEARRPEPELASA","WP_079177123_6","none"
"544","WP_009951067","WP_009951067_4","WP_009951067_4","Saccharopolyspora","none","none","WP_009951067_4","Saccharopolyspora erythraea NRRL 2338","7483","4","12.16","yes","MTDTAARSRLVTTHVADHTEPCLRCGKPTAQRALAVTGTGHTCVARSLCGECTGPHHRAADSESDNPSAGNLGRSR","WP_009951067_4","none"
"545","CAM04239","CAM04239_5","CAM04239_5","Saccharopolyspora","none","none","CAM04239_5","Saccharopolyspora erythraea NRRL 2338","7609","5","12.16","yes","MTDTAARSRLVTTHVADHTEPCLRCGKPTAQRALAVTGTGHTCVARSLCGECTGPHHRAADSESDNPSAGNLGRSR","CAM04239_5","none"
"546","WP_073785992","WP_073785992_2","WP_073785992_2","Streptomyces","Major Facilitator Superfamily","PF07690.16","WP_073785992_2","Streptomyces uncialis","3494","2","51.12","yes","MVGRQRTCAGAALFLIPVRSAPLLWFLSAAIGFLFRFSFPAWLCVPSGVSRVDAEHIGTAVGLMLTLAAVGGFVVPLVFEKIVPAAGYGAG","WP_073785992_2","1.40E-07"
"547","OKH95170","OKH95170_2","OKH95170_2","Streptomyces","Major Facilitator Superfamily","PF07690.16","OKH95170_2","Streptomyces uncialis","3617","2","51.12","yes","MVGRQRTCAGAALFLIPVRSAPLLWFLSAAIGFLFRFSFPAWLCVPSGVSRVDAEHIGTAVGLMLTLAAVGGFVVPLVFEKIVPAAGYGAG","OKH95170_2","1.40E-07"
"548","WP_110470681","WP_110470681_2","WP_110470681_2","Williamsia","Ephrin type-A receptor 2 transmembrane domain","PF14575.6","WP_110470681_2","Williamsia limnetica","6136","2","18.58","yes","MEIVAFVVIAVVVIAVVFLLPRTKKTQQPKDNQPHLQHEHRTGRARALRDRLRSKTPPH","WP_110470681_2","3.80E-06"
"549","PYE15898","PYE15898_2","PYE15898_2","Williamsia","Ephrin type-A receptor 2 transmembrane domain","PF14575.6","PYE15898_2","Williamsia limnetica","6118","2","18.58","yes","MEIVAFVVIAVVVIAVVFLLPRTKKTQQPKDNQPHLQHEHRTGRARALRDRLRSKTPPH","PYE15898_2","3.80E-06"
"550","SEE89807","SEE89807_1","SEE89807_1","Haloactinobacterium","Tautomerase enzyme","PF01361.21","SEE89807_1","Haloactinobacterium album","6549","1","53.61","yes","MPFIQVKVLENVFSDDQKQQMIRSLTDALVGIEGENMRPVTWCVVEEVRSGSWGIAGNPLTTADVVALSQGVSA","SEE89807_1","1.20E-16"
"551","WP_089774243","WP_089774243_2","WP_089774243_2","Haloactinobacterium","Tautomerase enzyme","PF01361.21","WP_089774243_2","Haloactinobacterium album","6429","2","53.61","yes","MPFIQVKVLENVFSDDQKQQMIRSLTDALVGIEGENMRPVTWCVVEEVRSGSWGIAGNPLTTADVVALSQGVSA","WP_089774243_2","1.20E-16"
"552","WP_088290452","WP_088290452_2","WP_088290452_2","Corynebacterium","none","none","WP_088290452_2","Corynebacterium diphtheriae","4375","2","10.08","yes","MQPNGNVVVDTIYRTAEHGDVTVIEAEPVESINECPTCGQPRVLRDHVIRPAQLLDVAPERNTDAFANMAK","WP_088290452_2","none"
"553","WP_088261769","WP_088261769_2","WP_088261769_2","Corynebacterium","none","none","WP_088261769_2","Corynebacterium diphtheriae bv. intermedius","2289","2","6.26","yes","MQPNGNAIVDTIYRTAEHGDVTVIEAEPINECPTCRQPTKP","WP_088261769_2","none"
"554","WP_017545560","WP_017545560_2","WP_017545560_2","Nocardiopsis","none","none","WP_017545560_2","Nocardiopsis prasina DSM 43845","48","2","17.48","yes","MGIRTWDSVGGGPHNRLTDLEEQELQQIEQTQSTQETDAHN","WP_017545560_2","none"
"555","WP_110050419","WP_110050419_5","WP_110050419_5","Nocardiopsis","none","none","WP_110050419_5","Nocardiopsis sp. L17-MgMaSL7","90","5","14.97","yes","MGIRTWDSVGGGPHNRLTDLEEQELQQIEQTQSTQETDAHN","WP_110050419_5","none"
"556","WP_107004474","WP_107004474_3","WP_107004474_3","Arthrobacter","none","none","WP_107004474_3","Arthrobacter woluwensis","7164","3","0.16","yes","MTGAFILCHETGPAVPTESPPDSWFTPVNFRG","WP_107004474_3","none"
"557","WP_066216109","WP_066216109_3","WP_066216109_3","Arthrobacter","none","none","WP_066216109_3","Arthrobacter woluwensis","7154","3","3.31","yes","MTGAFILCHETGPAVLTESPPETWFTPVNFRG","WP_066216109_3","none"
"558","WP_121030237","WP_121030237_3","WP_121030237_3","Terracoccus","none","none","WP_121030237_3","Terracoccus luteus","7827","3","22.07","yes","MRMETSRPGTAGPSRATYRAGGSVANQRAYSSFRPAKSPGSASSTPTSTTSSSVAPAARRTASQFVIACRVWAWMSSPAIRPVAGSTPVVPDMKTCEPARTAWLKSGELGASGVEMV","WP_121030237_3","none"
"559","RKT76768","RKT76768_3","RKT76768_3","Terracoccus","none","none","RKT76768_3","Terracoccus luteus","7842","3","22.07","yes","MRMETSRPGTAGPSRATYRAGGSVANQRAYSSFRPAKSPGSASSTPTSTTSSSVAPAARRTASQFVIACRVWAWMSSPAIRPVAGSTPVVPDMKTCEPARTAWLKSGELGASGVEMV","RKT76768_3","none"
"560","WP_073387576","WP_073387576_1","WP_073387576_1","Jatrophihabitans","Translation initiation factor 1A / IF-1","PF01176.19","WP_073387576_1","Jatrophihabitans endophyticus","2760","1","48.87","no","MAKKEGAIEVEGRVVEPLPNAMFRVELTNGHRVLAHISGKMRQHYIRILPEDRVVVELSPYDLTRGRIVYRYK","WP_073387576_1","9.80E-34"
"561","WP_095563712","WP_095563712_4","WP_095563712_4","Plantactinospora","Translation initiation factor 1A / IF-1","PF01176.19","WP_095563712_4","Plantactinospora sp. KBS50","7782","4","38.84","no","MPKKDGAIEIEGRVIEPLPNAMFRVELANGHKVLAHISGKMRQHYIRILPEDRVVVELSPYDLTRGRIVYRYK","WP_095563712_4","1.50E-33"
"562","ONI88739","ONI88739_2","ONI88739_2","Actinosynnema","none","none","ONI88739_2","Actinosynnema sp. ALI-1.44","86","2","3.79","yes","MTVGTLVVPSEAELDLDCEFGVERATAPSSWFFVTNFDGVPPDELSGD","ONI88739_2","none"
"563","WP_083752781","WP_083752781_2","WP_083752781_2","Actinosynnema","none","none","WP_083752781_2","Actinosynnema sp. ALI-1.44","77","2","3.79","yes","MTVGTLVVPSEAELDLDCEFGVERATAPSSWFFVTNFDGVPPDELSGD","WP_083752781_2","none"
"564","WP_094009173","WP_094009173_1","WP_094009173_1","Amycolatopsis","Plants and Prokaryotes Conserved (PCC) domain","PF03479.15","WP_094009173_1","Amycolatopsis sp. KNN50.9b","2626","1","80.77","no","MIVFEVPSGELVDELNRQAAEAGITDAAIVSLIGAADSFTVSTMPEGDALKDNITKYDLPGEMTGTGEIRNGFAHIHVVMGVEGDRAIAGHLHEAHIATHFARVYVIPVTSPGT","WP_094009173_1","2.80E-13"
"565","WP_053676554","WP_053676554_1","WP_053676554_1","Streptomyces","Plants and Prokaryotes Conserved (PCC) domain","PF03479.15","WP_053676554_1","Streptomyces sp. WM4235","2420","1","69.11","no","MIVFEVPHGELVDELNRQAAEAGITDAAIVSLIGAADSFTVSTMPEGDALKDTITKYDLPGEMTGTGEIRNGFVHLHVVMGVEGDRAIAGHLHEATIATHFARAYVIPVD","WP_053676554_1","1.20E-13"
"566","WP_084692311","WP_084692311_4","WP_084692311_4","Frankia","Coenzyme PQQ synthesis protein D (PqqD)","PF05402.12","WP_084692311_4","Frankia elaeagni","3580","4","20.86","yes","MSINSNIFFRKSDSLEVEEIDTGYFLSSDGRRWVKVERTALAVWNSLEEPASIGDLVTELLGKYDGEPERIRSDVSALLMTWTELGLVATQ","WP_084692311_4","1.40E-14"
"567","WP_084692314","WP_084692314_2","WP_084692314_2","Frankia","Coenzyme PQQ synthesis protein D (PqqD)","PF05402.12","WP_084692314_2","Frankia elaeagni","3","2","20.86","yes","MSINSNIFFRKSDSLEVEEIDTGYFLSSDGRRWVKVERTALAVWNSLEEPASIGDLVTELLGKYDGEPERIRSDVSALLMTWTELGLVATQ","WP_084692314_2","1.40E-14"
"568","ROS45991","ROS45991_1","ROS45991_1","Curtobacterium","ENT domain","PF03735.14","ROS45991_1","Curtobacterium sp. PhB78","5738","1","20.43","yes","MTMTAPDLARELRIDPKRLRAFMRRTATDHRLGNQWAIDDVLADKAREYFLK","ROS45991_1","2.10E-07"
"569","WP_123292376","WP_123292376_1","WP_123292376_1","Curtobacterium","ENT domain","PF03735.14","WP_123292376_1","Curtobacterium sp. PhB78","5738","1","20.43","yes","MTMTAPDLARELRIDPKRLRAFMRRTATDHRLGNQWAIDDVLADKAREYFLK","WP_123292376_1","2.10E-07"
"570","OJV24806","OJV24806_1","OJV24806_1","Actinobacteria","none","none","OJV24806_1","Actinobacteria bacterium 69-20","6769","1","21.33","no","MTTSVSPGPAGREADTEPPRAAPQPEATLPKGFKTLRPDFRPTVPTRTAEAPARSVWGFGKRWAALALVQRQPRQR","OJV24806_1","none"
"571","OJV25031","OJV25031_1","OJV25031_1","Actinobacteria","none","none","OJV25031_1","Actinobacteria bacterium 69-20","2907","1","21.33","no","MTTSVSPGPAGREADTEPPRAAPQPEATLPKGFKTLRPDFRPTVPTRTAEAPARSVWGFGKRWAALALVQRQPRQR","OJV25031_1","none"
"572","WP_078590495","WP_078590495_2","WP_078590495_2","Streptomyces","none","none","WP_078590495_2","Streptomyces cattleya NRRL 8057 = DSM 46488","3787","2","35.06","yes","MIEKENENAAEADEFLYAEVLEDTATSYSKGSSSCGFNPSGT","WP_078590495_2","none"
"573","CCB71037","CCB71037_2","CCB71037_2","Streptomyces","none","none","CCB71037_2","Streptomyces cattleya NRRL 8057 = DSM 46488","3786","2","35.06","yes","MIEKENENAAEADEFLYAEVLEDTATSYSKGSSSCGFNPSGT","CCB71037_2","none"
"574","CAM04239","CAM04239_4","CAM04239_4","Saccharopolyspora","none","none","CAM04239_4","Saccharopolyspora erythraea NRRL 2338","2080","4","14.99","yes","MHHHAAIDTHDGALAGKCTGVVNDLAHKRSDVVGVALYRGAAS","CAM04239_4","none"
"575","WP_009951067","WP_009951067_3","WP_009951067_3","Saccharopolyspora","none","none","WP_009951067_3","Saccharopolyspora erythraea NRRL 2338","1954","3","14.99","yes","MHHHAAIDTHDGALAGKCTGVVNDLAHKRSDVVGVALYRGAAS","WP_009951067_3","none"
"576","WP_062760655","WP_062760655_1","WP_062760655_1","Streptomyces","none","none","WP_062760655_1","Streptomyces sp. WAC00288","5711","1","48.03","yes","MRDSRSRAFVRLTFANPASLVYLGLVVAAALSLVFASATGDTGFAAVWILLITAPTSMFLLLPDFTNGDSALATGYFLAALALSALLHAFLLGLVYRGVRGGTASRVHASA","WP_062760655_1","none"
"577","WP_122198059","WP_122198059_3","WP_122198059_3","Actinomadura","none","none","WP_122198059_3","Actinomadura sp. NEAU-Ht49","5946","3","2.63","yes","MSLAKEVGLVGLVTPRELSLVFVMAG","WP_122198059_3","none"
"578","KHK96352","KHK96352_1","KHK96352_1","Microbacterium","Antibiotic biosynthesis monooxygenase","PF03992.16","KHK96352_1","Microbacterium mangrovi","341","1","47.96","no","MIITVFRQRTRSDAGAEYADLERRLLEAAREVPGFVSFKRFRAEDGENCAIVEFEDDEAHSRWVAHPLHREAMAAGRSSFFESYRISVARVLRVLQQEPEDHVRVFTEGSR","KHK96352_1","1.80E-13"
"579","WP_082008308","WP_082008308_1","WP_082008308_1","Microbacterium","Antibiotic biosynthesis monooxygenase","PF03992.16","WP_082008308_1","Microbacterium mangrovi","341","1","47.96","no","MIITVFRQRTRSDAGAEYADLERRLLEAAREVPGFVSFKRFRAEDGENCAIVEFEDDEAHSRWVAHPLHREAMAAGRSSFFESYRISVARVLRVLQQEPEDHVRVFTEGSR","WP_082008308_1","1.80E-13"
"580","WP_116026137","WP_116026137_2","WP_116026137_2","Actinomadura","none","none","WP_116026137_2","Actinomadura umbrina","7","2","14.85","yes","MSEPPPREAGRVSAGLAGPGPAALAAFAADQACRGAACDHAPAETEAALLDTLRVRGEDAWRVAEARRRPGRSRAGDDEKEETP","WP_116026137_2","none"
"581","WP_116026136","WP_116026136_2","WP_116026136_2","Actinomadura","none","none","WP_116026136_2","Actinomadura umbrina","1222","2","14.85","yes","MSEPPPREAGRVSAGLAGPGPAALAAFAADQACRGAACDHAPAETEAALLDTLRVRGEDAWRVAEARRRPGRSRAGDDEKEETP","WP_116026136_2","none"
"582","OKL53160","OKL53160_1","OKL53160_1","Actinomyces","none","none","OKL53160_1","Actinomyces nasicola","5319","1","25.15","no","MTIHLMDAIEDAVETSIQPLIPDPFCELWTVMFRVVETGTVIPAWAKAELLDEFEPIYFILLKKKGKDYRLFRVECGLMRPGRQ","OKL53160_1","none"
"583","WP_083603298","WP_083603298_1","WP_083603298_1","Actinomyces","none","none","WP_083603298_1","Actinomyces nasicola","5235","1","25.15","no","MTIHLMDAIEDAVETSIQPLIPDPFCELWTVMFRVVETGTVIPAWAKAELLDEFEPIYFILLKKKGKDYRLFRVECGLMRPGRQ","WP_083603298_1","none"
"584","WP_053775070","WP_053775070_1","WP_053775070_1","Clavibacter","Bacterial regulatory proteins, gntR family","PF00392.21","WP_053775070_1","Clavibacter michiganensis subsp. capsici","1244","1","59.43","yes","MLITVDPAAKASLAEQVATQIRYAIARGELASGERLPSARDLAASVEVNMHTVLRAYASLQEDGLIELRRGRGATVIRSGNASFDRLRTLVEELREQAETLGVPLDDLFAMIKGAR","WP_053775070_1","1.60E-19"
"585","WP_029068734","WP_029068734_3","WP_029068734_3","Jonesia","Bacterial regulatory proteins, gntR family","PF00392.21","WP_029068734_3","Jonesia quinghaiensis DSM 15701","7443","3","30.85","yes","MLFRVDTTSSEPIFEQLAHQIRIAILQGNLAAGDRLPPAREVAGALDVNLHTVLHAYQMLRDEGQIELRRGRGALVSNQAQAVPREVTEAVAALVTQAHQAHLAPHIVVSLVKEALA","WP_029068734_3","8.40E-19"
"586","ERS23150","ERS23150_2","ERS23150_2","Propionibacterium","none","none","ERS23150_2","Propionibacterium sp. KPL2005","8","2","12.32","yes","MSDFISKPESSPHKKVSIKVKEVPEKTRDENILAPNGNHHPSPTQG","ERS23150_2","none"
"587","EGY78124","EGY78124_2","EGY78124_2","Cutibacterium","none","none","EGY78124_2","Cutibacterium avidum ATCC 25577","968","2","5.75","yes","MSDFISKPESSPHKKVSIKVKEVPEKTRDENILAPNGNHHPSPTQG","EGY78124_2","none"
"588","WP_062097999","WP_062097999_5","WP_062097999_5","Arthrobacter","none","none","WP_062097999_5","Arthrobacter sp. ATCC 21022","7008","5","10.6","yes","MGLTSCLVLTIMGMLALPGWEREWAWDANITSSRQCTNIFRAGKYFVCTKDFPSR","WP_062097999_5","none"
"589","WP_128397239","WP_128397239_5","WP_128397239_5","Paenarthrobacter","none","none","WP_128397239_5","Paenarthrobacter ureafaciens","7008","5","10.6","yes","MGLTSCLVLTIMGMLALPGWEREWAWDANITSSRQCTNIFRAGKYFVCTKDFPSR","WP_128397239_5","none"
"590","WP_101557151","WP_101557151_3","WP_101557151_3","Brevibacterium","none","none","WP_101557151_3","Brevibacterium aurantiacum","2379","3","1.1","yes","MKADTLLHSFFRAGIADTVLLI","WP_101557151_3","none"
"591","WP_101557149","WP_101557149_3","WP_101557149_3","Brevibacterium","none","none","WP_101557149_3","Brevibacterium aurantiacum","4484","3","1.1","yes","MKADTLLHSFFRAGIADTVLLI","WP_101557149_3","none"
"592","WP_083191919","WP_083191919_2","WP_083191919_2","Streptomyces","none","none","WP_083191919_2","Streptomyces violaceoruber","4576","2","33.16","yes","MSTDRFRRAERIAAILADPEVQRIGALIQDEETRAGQELHAELQVLQDRYETAVRTGDLTVLTQVCGGGKHGRWGRICVQDTGHETRTPHWGTTPDGTPVAWIGSAPDDD","WP_083191919_2","none"
"593","KOG82578","KOG82578_2","KOG82578_2","Streptomyces","none","none","KOG82578_2","Streptomyces griseus subsp. rhodochrous","4748","2","33.16","yes","MSTDRFRRAERIAAILADPEVQRIGALIQDEETRAGQELHAELQVLQDRYETAVRTGDLTVLTQVCGGGKHGRWGRICVQDTGHETRTPHWGTTPDGTPVAWIGSAPDDD","KOG82578_2","none"
"594","WP_046468711","WP_046468711_1","WP_046468711_1","Allosalinactinospora","none","none","WP_046468711_1","Allosalinactinospora lopnorensis","7798","1","34.0","yes","MPEKTETPHREFAALIDRLSTEFAEVHPRATVTKCVDAARHGAQDVTGRATPDLVERIARQHLQVLAMALAERR","WP_046468711_1","none"
"595","WP_051458214","WP_051458214_3","WP_051458214_3","Microbispora","none","none","WP_051458214_3","Microbispora sp. ATCC PTA-5024","6740","3","38.67","yes","MSELPADERYEQLEALLRDEFAGVHPAATVTRCVQAAHHGAVEVTGSAPPALVERIARKHLRVLATAAAERG","WP_051458214_3","none"
"596","WP_067972339","WP_067972339_1","WP_067972339_1","Nocardiopsis","Protein of unknown function (DUF1048)","PF06304.11","WP_067972339_1","Nocardiopsis trehalosi NBRC 14201","2290","1","89.85","no","MGIQDIIEGKRQWRAHVARVKALPPDYQIVYNEMQKYYFKVGPVDLTEGDLLGGILEFFEEGAASGKGVLDLIGTDVAAFADGLIKDSRTYAELYQESAGGQAGPAGK","WP_067972339_1","7.00E-36"
"597","WP_111166051","WP_111166051_1","WP_111166051_1","Sphaerisporangium","Protein of unknown function (DUF1048)","PF06304.11","WP_111166051_1","Sphaerisporangium sp. 7K107","5616","1","85.24","yes","MGIQDIIEGKKQWRAHMARVKALPPDYQIVYQEMQRYFFKVGPVDLPDGPLLSGIVDFFEEGAANGKGVLQLIGNDVAAFCDDLIKDSRTYADIYQQSISGKPGTADK","WP_111166051_1","6.80E-39"
"598","KQR47999","KQR47999_2","KQR47999_2","Microbacterium","none","none","KQR47999_2","Microbacterium sp. Leaf161","4823","2","2.5","no","MLYTATLDVGAAEPLAVTGVTLRGAVNATVIAVLDSIRSGFHQVQVATEGRSGTSRCSVC","KQR47999_2","none"
"599","WP_082508744","WP_082508744_2","WP_082508744_2","Microbacterium","none","none","WP_082508744_2","Microbacterium sp. Leaf161","4823","2","2.5","no","MLYTATLDVGAAEPLAVTGVTLRGAVNATVIAVLDSIRSGFHQVQVATEGRSGTSRCSVC","WP_082508744_2","none"
"600","WP_083115866","WP_083115866_2","WP_083115866_2","Mycobacterium","none","none","WP_083115866_2","Mycobacterium angelicum","1681","2","13.89","no","MSTSAITNNGPDALRYNRIGLLRRGVAGALLATSISTTAAVGLAATSHADDNAPPPNAGAAVSAVTAPTLDAPWLPLIDQFGGYGPLRYCSPHWAGFWHCH","WP_083115866_2","none"
"601","ORA12704","ORA12704_2","ORA12704_2","Mycobacterium","none","none","ORA12704_2","Mycobacterium angelicum","1687","2","13.89","no","MSTSAITNNGPDALRYNRIGLLRRGVAGALLATSISTTAAVGLAATSHADDNAPPPNAGAAVSAVTAPTLDAPWLPLIDQFGGYGPLRYCSPHWAGFWHCH","ORA12704_2","none"
"602","WP_100302197","WP_100302197_1","WP_100302197_1","Streptomyces","none","none","WP_100302197_1","Streptomyces sp. CNZ306","308","1","21.25","yes","MEDELEFEVEESEEFEATPMGRACGGCSCQGGCLSNCVMKPKP","WP_100302197_1","none"
"603","PJJ46026","PJJ46026_1","PJJ46026_1","Streptomyces","none","none","PJJ46026_1","Streptomyces sp. CNZ306","113","1","21.25","yes","MEDELEFEVEESEEFEATPMGRACGGCSCQGGCLSNCVMKPKP","PJJ46026_1","none"
"604","WP_112443292","WP_112443292_6","WP_112443292_6","Streptomyces","Transposase, Mutator family","PF00872.18","WP_112443292_6","Streptomyces sp. ZFG47","5690","6","12.1","yes","MTSKVSSETPRRWALCEVLWSDAWAEFVPFLSFDVEIRKVICSTNAIESVNARIRRAFRARGHFPNEAAALKCICWR","WP_112443292_6","9.20E-23"
"605","WP_063274437","WP_063274437_2","WP_063274437_2","Amycolatopsis","Transposase, Mutator family","PF00872.18","WP_063274437_2","Amycolatopsis keratiniphila subsp. keratiniphila","3612","2","3.84","yes","MGRKYGAMIRLWRNTWEEFIPFLDYAAEIRRVMCSKSAIESLNSRYRRAVRARSHFPTEQAALKCLYLATRSLDSTATGQARWKMRWNPH","WP_063274437_2","1.10E-22"
"606","WP_122198059","WP_122198059_1","WP_122198059_1","Actinomadura","none","none","WP_122198059_1","Actinomadura sp. NEAU-Ht49","5642","1","16.49","no","MRLPRQSSSVVRVPVPFVRKDVGLGDALKALTSAVGVKPCHPCAERAARLNRRVVLTGRDGRR","WP_122198059_1","none"
"607","WP_117355837","WP_117355837_1","WP_117355837_1","Actinomadura","none","none","WP_117355837_1","Actinomadura sp. NEAU-G17","5927","1","21.32","no","MRLPRQSSSVVRVPVPFVRKDVGLGDALKALTSAMGVKPCSPCAERAARLNQRMVFTGRDGRRS","WP_117355837_1","none"
"608","WP_091273394","WP_091273394_4","WP_091273394_4","Frankia","none","none","WP_091273394_4","Frankia irregularis","2519","4","39.27","yes","MSRIFALSAATRPQVLAALVSGMGLLIAVIAMFTPRGSHAATSALGIVGIVAMLALVTGMGVLIGQAVSHRSGGGS","WP_091273394_4","none"
"609","WP_076825825","WP_076825825_2","WP_076825825_2","Frankia","none","none","WP_076825825_2","Frankia sp. CcI49","2455","2","45.64","yes","MSRIFALSAASRPQALAALVSGMGLLVAVIAMLTPQGSNTATSALGIVSVVAMLVLITGMGVLIGQALSHRSGGGS","WP_076825825_2","none"
"610","OPF84252","OPF84252_3","OPF84252_3","Streptomyces","HAD-hyrolase-like","PF13242.6","OPF84252_3","Streptomyces antioxidans","1543","3","17.19","yes","MLVGDTPSDVRGGLAAGVRVVAVATGRTTPDELRAAGAAEVVNDLADTDRMLRLLTG","OPF84252_3","4.20E-13"
"611","WP_078841030","WP_078841030_3","WP_078841030_3","Streptomyces","HAD-hyrolase-like","PF13242.6","WP_078841030_3","Streptomyces antioxidans","1486","3","17.19","yes","MLVGDTPSDVRGGLAAGVRVVAVATGRTTPDELRAAGAAEVVNDLADTDRMLRLLTG","WP_078841030_3","4.20E-13"
"612","AXG59058","AXG59058_3","AXG59058_3","Streptomyces","none","none","AXG59058_3","Streptomyces lincolnensis","1709","3","0.54","no","MVDVVVPEDLTGQFLAEQIRQDVRIDGDRAVLVLAAAGVVRGGRTRHVRQDLRECHDRPGRAGMSTVPVGP","AXG59058_3","none"
"613","ANS70161","ANS70161_3","ANS70161_3","Streptomyces","none","none","ANS70161_3","Streptomyces lincolnensis","1709","3","0.54","no","MVDVVVPEDLTGQFLAEQIRQDVRIDGDRAVLVLAAAGVVRGGRTRHVRQDLRECHDRPGRAGMSTVPVGP","ANS70161_3","none"
"614","WP_121030237","WP_121030237_2","WP_121030237_2","Terracoccus","Urease beta subunit","PF00699.20","WP_121030237_2","Terracoccus luteus","6793","2","56.74","yes","MAGTSSSGPGAIRTGEGDVELNADRRDDERLNLVVENTGDRPVQIGSHLHLPDANAALHFDRAAAHGFRLDVPSGTSQRFEPGASRRVDAVAVRGRRVVPGIQAKTDGGVL","WP_121030237_2","3.50E-40"
"615","RKT76768","RKT76768_2","RKT76768_2","Terracoccus","Urease beta subunit","PF00699.20","RKT76768_2","Terracoccus luteus","6808","2","56.74","yes","MAGTSSSGPGAIRTGEGDVELNADRRDDERLNLVVENTGDRPVQIGSHLHLPDANAALHFDRAAAHGFRLDVPSGTSQRFEPGASRRVDAVAVRGRRVVPGIQAKTDGGVL","RKT76768_2","3.50E-40"
"616","ACZ89043","ACZ89043_4","ACZ89043_4","Streptosporangium","none","none","ACZ89043_4","Streptosporangium roseum DSM 43021","6576","4","7.99","yes","MNNRISQSVPHLHIRVVPRHHKDGLCGFSWSRTMYGGPAETEPYALRINEALPPGR","ACZ89043_4","none"
"617","WP_081453250","WP_081453250_3","WP_081453250_3","Streptosporangium","none","none","WP_081453250_3","Streptosporangium roseum DSM 43021","6426","3","7.99","yes","MNNRISQSVPHLHIRVVPRHHKDGLCGFSWSRTMYGGPAETEPYALRINEALPPGR","WP_081453250_3","none"
"618","WP_132170149","WP_132170149_1","WP_132170149_1","Actinomadura","none","none","WP_132170149_1","Actinomadura sp. KC216","1387","1","16.39","yes","MQLVATLVHERADGVRVRLGDGTAALPEGIGRAELLLPPLAAELPAADRLHVELTAGRVPRRPAPREAARYEIEHGPLRLPQPAAEEPR","WP_132170149_1","none"
"619","WP_132170147","WP_132170147_1","WP_132170147_1","Actinomadura","none","none","WP_132170147_1","Actinomadura sp. KC216","4","1","16.39","yes","MQLVATLVHERADGVRVRLGDGTAALPEGIGRAELLLPPLAAELPAADRLHVELTAGRVPRRPAPREAARYEIEHGPLRLPQPAAEEPR","WP_132170147_1","none"
"620","OJV24808","OJV24808_3","OJV24808_3","Actinobacteria","none","none","OJV24808_3","Actinobacteria bacterium 69-20","2477","3","7.93","yes","MHSVALPQAIWARCGLPSRIECSGGTVRTAIEDCCRRLPQLGLYLSTDPVGQPGGAVIFADGNRVMNADLELAAPTNLRVIIPSAGG","OJV24808_3","none"
"621","OJV24806","OJV24806_3","OJV24806_3","Actinobacteria","none","none","OJV24806_3","Actinobacteria bacterium 69-20","4669","3","7.93","yes","MHSVALPQAIWARCGLPSRIECSGGTVRTAIEDCCRRLPQLGLYLSTDPVGQPGGAVIFADGNRVMNADLELAAPTNLRVIIPSAGG","OJV24806_3","none"
"622","WP_116154877","WP_116154877_7","WP_116154877_7","Streptomyces","none","none","WP_116154877_7","Streptomyces sp. 3212.4","7239","7","19.62","yes","MGLHWAWHALALAGACRMTAVAFDAVVRRVVRTASQARDEQHMRARVSAPPALPAGPRPDTGIAVPPPVVEEQ","WP_116154877_7","none"
"623","RED74809","RED74809_7","RED74809_7","Streptomyces","none","none","RED74809_7","Streptomyces sp. 67","7200","7","19.62","yes","MGLHWAWHALALAGACRMTAVAFDAVVRRVVRTASQARDEQHMRARVSAPPALPAGPRPDTGIAVPPPVVEEQ","RED74809_7","none"
"624","WP_100302197","WP_100302197_2","WP_100302197_2","Streptomyces","none","none","WP_100302197_2","Streptomyces sp. CNZ306","7535","2","3.48","yes","MLGERAVWMYQTTDPKLQIKRADQLFTRLKSLLPKR","WP_100302197_2","none"
"625","PJJ46026","PJJ46026_2","PJJ46026_2","Streptomyces","none","none","PJJ46026_2","Streptomyces sp. CNZ306","7535","2","3.48","yes","MLGERAVWMYQTTDPKLQIKRADQLFTRLKSLLPKR","PJJ46026_2","none"
"626","WP_105032337","WP_105032337_2","WP_105032337_2","Arthrobacter","Branched-chain amino acid transport protein (AzlD","PF05437.12","WP_105032337_2","Arthrobacter ruber","457","2","55.3","yes","MSLWGWILLACAVSVATKFAGFLVPAKLLDNPRMLRVAGSLTIGLLAALTAVNTFATGQVLVVDARVVALAAAAVALWLRAPFLVVVAVGALAAGVARLLGAA","WP_105032337_2","7.50E-15"
"627","WP_104181080","WP_104181080_2","WP_104181080_2","Arthrobacter","Branched-chain amino acid transport protein (AzlD","PF05437.12","WP_104181080_2","Arthrobacter sp. B0490","415","2","57.96","yes","MNLWGWILLACAVSVATKFAGYLVPAKLLDNPRMLRVAGSLTIGLLAALTAVNTFASGRALVVDARLVALVAAAVALRLRAPFLVVVAVGALAAGLARLLGAA","WP_104181080_2","4.30E-14"
"628","WP_125614105","WP_125614105_1","WP_125614105_1","Streptomyces","Transcription factor WhiB","PF02467.16","WP_125614105_1","Streptomyces sp. CFMR 7","6693","1","39.87","yes","MLINMVTEDALDWQESALCAQAGPEFFFPAPGSSTREAKQLCGACEGRMACLEYALANDERFGVWGGLSEKERERLRRKEREQG","WP_125614105_1","2.60E-27"
"629","PDQ36469","PDQ36469_2","PDQ36469_2","Candidatus","Transcription factor WhiB","PF02467.16","PDQ36469_2","Candidatus Lumbricidophila eiseniae","3091","2","36.68","yes","MNTDTRQLSAAALEDLQRLLHAADPLAAAPLTDPRWDAAALCAQTDPEAFLPEKGGSTRDAKKVCQSCEVKAQCLAYALANDECFGIWGGLSSRERRKVQA","PDQ36469_2","1.40E-26"
"630","WP_061787443","WP_061787443_4","WP_061787443_4","Pseudopropionibacterium","FeoA domain","PF04023.14","WP_061787443_4","Pseudopropionibacterium propionicum","7386","4","8.0","no","MNETPSAARTLADLKVGASARITGFDGDDVISRRLFDLGFAPGLTCRLERRAPLLDPLMFNVGGTEIVLRHSEASRVLVKP","WP_061787443_4","2.60E-20"
"631","WP_130875440","WP_130875440_1","WP_130875440_1","Pseudopropionibacterium","FeoA domain","PF04023.14","WP_130875440_1","Pseudopropionibacterium sp. Marseille-P6184","6913","1","15.12","no","MNETPATARTLADLKVGASARITGFDSDDVISRRLFDLGFAPGLTCRLERRAPLHDPLMFNVGGTEIVLRHSEASRVLVAS","WP_130875440_1","3.90E-20"
"632","WP_017568552","WP_017568552_3","WP_017568552_3","Nocardiopsis","Signal peptidase, peptidase S26","PF10502.9","WP_017568552_3","Nocardiopsis synnemataformans DSM 44143","3863","3","6.0","yes","MARVGPLGREAHGAGLVHXVPATAGARYPAEVGAPGTVPPGHVFLLGDHASSSDSRDHGPCPEHQVLGVVVRRLAPGPGNPG","WP_017568552_3","2.50E-09"
"633","WP_017568553","WP_017568553_3","WP_017568553_3","Nocardiopsis","Signal peptidase, peptidase S26","PF10502.9","WP_017568553_3","Nocardiopsis synnemataformans DSM 44143","2517","3","6.0","yes","MARVGPLGREAHGAGLVHXVPATAGARYPAEVGAPGTVPPGHVFLLGDHASSSDSRDHGPCPEHQVLGVVVRRLAPGPGNPG","WP_017568553_3","2.50E-09"
"634","WP_135448567","WP_135448567_2","WP_135448567_2","Brevibacterium","none","none","WP_135448567_2","Brevibacterium aurantiacum","1755","2","4.58","yes","MAGAIGPGTISRTYQEPHYDSVQATVATTDA","WP_135448567_2","none"
"635","WP_096168585","WP_096168585_3","WP_096168585_3","Brevibacterium","none","none","WP_096168585_3","Brevibacterium aurantiacum","1755","3","5.93","yes","MAGAIGPGTISRTYQEPHYDSVQAAVATTDA","WP_096168585_3","none"
"636","WP_131965735","WP_131965735_4","WP_131965735_4","Actinomadura","Nuclease-related domain","PF08378.11","WP_131965735_4","Actinomadura sp. KC06","3360","4","8.42","no","MADIVGGGHRSTTLSATIAHLRDHGPDDWLIPHNIELPVRGDMYEVDLAVVMPHAVCIIDAKGTRGRVEVAGRRWYPSNRGYFYSPVPRHGLGAGRRLAAEARAHRH","WP_131965735_4","2.30E-13"
"637","WP_131965734","WP_131965734_3","WP_131965734_3","Actinomadura","Nuclease-related domain","PF08378.11","WP_131965734_3","Actinomadura sp. KC06","4589","3","8.42","no","MADIVGGGHRSTTLSATIAHLRDHGPDDWLIPHNIELPVRGDMYEVDLAVVMPHAVCIIDAKGTRGRVEVAGRRWYPSNRGYFYSPVPRHGLGAGRRLAAEARAHRH","WP_131965734_3","2.30E-13"
"638","WP_078590495","WP_078590495_1","WP_078590495_1","Streptomyces","Amidohydrolase family","PF01979.20","WP_078590495_1","Streptomyces cattleya NRRL 8057 = DSM 46488","100","1","47.59","yes","MPTFDAADLIAFATIEGARACGIDDRTGSVTPGKEADLIMVRLDHTNLLPATDVAASIVAGGHAGNADLVVVAGEVLKEDGALVRGDSVFAEAAASRDRLFHAAGLPLPS","WP_078590495_1","7.70E-19"
"639","CCB71037","CCB71037_1","CCB71037_1","Streptomyces","Amidohydrolase family","PF01979.20","CCB71037_1","Streptomyces cattleya NRRL 8057 = DSM 46488","380","1","47.59","yes","MPTFDAADLIAFATIEGARACGIDDRTGSVTPGKEADLIMVRLDHTNLLPATDVAASIVAGGHAGNADLVVVAGEVLKEDGALVRGDSVFAEAAASRDRLFHAAGLPLPS","CCB71037_1","7.70E-19"
"640","WP_084692311","WP_084692311_6","WP_084692311_6","Frankia","none","none","WP_084692311_6","Frankia elaeagni","3860","6","13.99","yes","MLQTADHQPSRSPYGITWLPDHDVLAVVLSVRLATGKQRYSDRGRITQICGRMIACAGHYSWRERTAGRRFRALAAEAIRFLAVHLGAVVTHTEAIRRTMPATSGKVEG","WP_084692311_6","none"
"641","WP_084692314","WP_084692314_4","WP_084692314_4","Frankia","none","none","WP_084692314_4","Frankia elaeagni","277","4","13.99","yes","MLQTADHQPSRSPYGITWLPDHDVLAVVLSVRLATGKQRYSDRGRITQICGRMIACAGHYSWRERTAGRRFRALAAEAIRFLAVHLGAVVTHTEAIRRTMPATSGKVEG","WP_084692314_4","none"
"642","OKI46856","OKI46856_3","OKI46856_3","Streptomyces","none","none","OKI46856_3","Streptomyces sp. TSRI0281","7215","3","14.71","yes","MTGRASRRRSCCGTPLLAGWLPEEILRRWELQFGHGSGAKDVLTEVLTSEGSARTVMGDADEEAAFSALWLADFPGVDPERASAS","OKI46856_3","none"
"643","WP_079182634","WP_079182634_3","WP_079182634_3","Streptomyces","none","none","WP_079182634_3","Streptomyces sp. TSRI0281","7215","3","14.71","yes","MTGRASRRRSCCGTPLLAGWLPEEILRRWELQFGHGSGAKDVLTEVLTSEGSARTVMGDADEEAAFSALWLADFPGVDPERASAS","WP_079182634_3","none"
"644","WP_048317341","WP_048317341_2","WP_048317341_2","Rhodococcus","none","none","WP_048317341_2","Rhodococcus sp. PBTS 2","3753","2","15.25","no","MSGGNTWHDKLRQSGPAITGVSSSVSVQLSANVCQSSKANGLCTIELVVGLCGALCAADDSISSKANGLCTIEFVVAPCSALVVGAPAISVAVKLDITHTFFHC","WP_048317341_2","none"
"645","WP_048316860","WP_048316860_2","WP_048316860_2","Rhodococcus","none","none","WP_048316860_2","Rhodococcus sp. PBTS 2","2345","2","15.25","no","MSGGNTWHDKLRQSGPAITGVSSSVSVQLSANVCQSSKANGLCTIELVVGLCGALCAADDSISSKANGLCTIEFVVAPCSALVVGAPAISVAVKLDITHTFFHC","WP_048316860_2","none"
"646","EXG81129","EXG81129_1","EXG81129_1","Cryptosporangium","Helix-turn-helix domain","PF12840.7","EXG81129_1","Cryptosporangium arvum DSM 44712","7732","1","62.47","no","MPESTRELAHPEPADFVLTDVLFALSDPSRLAIVRQLADGPVETVGCQTLGGEIPKSTRSHYLKTLREAGIIRNVAHGRERLVSLRVDELEARFPGLLASVLAATGGDSSPADPTPL","EXG81129_1","7.10E-12"
"647","WP_035861760","WP_035861760_1","WP_035861760_1","Cryptosporangium","Helix-turn-helix domain","PF12840.7","WP_035861760_1","Cryptosporangium arvum DSM 44712","7792","1","62.47","no","MPESTRELAHPEPADFVLTDVLFALSDPSRLAIVRQLADGPVETVGCQTLGGEIPKSTRSHYLKTLREAGIIRNVAHGRERLVSLRVDELEARFPGLLASVLAATGGDSSPADPTPL","WP_035861760_1","7.10E-12"
"648","WP_103960548","WP_103960548_1","WP_103960548_1","Nonomuraea","none","none","WP_103960548_1","Nonomuraea solani","3606","1","23.17","yes","MSSSIDIDKRSRANSTKRSQGLDQSIKVWNVDNFPNRDDAAAFVNVDPAQGAGEAAFSNCPDGSVDVYYYL","WP_103960548_1","none"
"649","SEG99236","SEG99236_1","SEG99236_1","Nonomuraea","none","none","SEG99236_1","Nonomuraea solani","3606","1","23.17","yes","MSSSIDIDKRSRANSTKRSQGLDQSIKVWNVDNFPNRDDAAAFVNVDPAQGAGEAAFSNCPDGSVDVYYYL","SEG99236_1","none"
"650","WP_133828511","WP_133828511_1","WP_133828511_1","Actinomycetospora","none","none","WP_133828511_1","Actinomycetospora succinea","3556","1","57.56","no","MIEKYNPWTVVNLVFEHLADQGLHPVLGENGDPSAAAAELLSSLGITPGDPSWGEGQDAERVREDLAALRAAFDPVDSTDSRE","WP_133828511_1","none"
"651","WP_116708219","WP_116708219_1","WP_116708219_1","Actinomycetospora","none","none","WP_116708219_1","Actinomycetospora cinnamomea","3549","1","39.66","no","MIEKYNPWTVVNVVFRHLAEQGLHPVLGESGDPSAAASQLLEALGITPGDPSWGEGQDAERVRNDLAALREAFEADESTSSRDR","WP_116708219_1","none"
"652","EGQ75425","EGQ75425_4","EGQ75425_4","Actinomyces","none","none","EGQ75425_4","Actinomyces sp. oral taxon 448 str. F0400","1084","4","9.94","yes","MDDAVAHVVLEQAEADGLQSLGGRRDLGEDVNAVGVLLDHAGDAADLSLNAAQPLEVVILGARVAGHPSSLLCRGAIEFTPRG","EGQ75425_4","none"
"653","WP_034253534","WP_034253534_4","WP_034253534_4","Actinomyces","none","none","WP_034253534_4","Actinomyces sp. oral taxon 448 str. F0400","1171","4","9.94","yes","MDDAVAHVVLEQAEADGLQSLGGRRDLGEDVNAVGVLLDHAGDAADLSLNAAQPLEVVILGARVAGHPSSLLCRGAIEFTPRG","WP_034253534_4","none"
"654","WP_040887728","WP_040887728_4","WP_040887728_4","Streptomyces","Domain of unknown function (DUF834)","PF05754.14","WP_040887728_4","Streptomyces mobaraensis NBRC 13819 = DSM 40847","6622","4","9.59","yes","MGVAARVTVGASVPVASEPVWPTGSAAAETNAWCHGSDGVSRTYGERRTPHPLHLDVAAGACTALFGRNRSGKSTLLRIADDRDRPT","WP_040887728_4","2.20E-05"
"655","EMF02011","EMF02011_4","EMF02011_4","Streptomyces","Domain of unknown function (DUF834)","PF05754.14","EMF02011_4","Streptomyces mobaraensis NBRC 13819 = DSM 40847","6622","4","9.59","yes","MGVAARVTVGASVPVASEPVWPTGSAAAETNAWCHGSDGVSRTYGERRTPHPLHLDVAAGACTALFGRNRSGKSTLLRIADDRDRPT","EMF02011_4","2.20E-05"
"656","WP_082115066","WP_082115066_4","WP_082115066_4","Lentzea","none","none","WP_082115066_4","Lentzea aerocolonigenes","3468","4","10.1","yes","MEQTDFLLPDGEHDLLRRIRQLAERAERTAHNRSNLVGPPPSQEHLDILAEIRALTEEMTTSRRAEALPRPARPADDLIPNG","WP_082115066_4","none"
"657","KJK44488","KJK44488_5","KJK44488_5","Lentzea","none","none","KJK44488_5","Lentzea aerocolonigenes","3555","5","10.1","yes","MEQTDFLLPDGEHDLLRRIRQLAERAERTAHNRSNLVGPPPSQEHLDILAEIRALTEEMTTSRRAEALPRPARPADDLIPNG","KJK44488_5","none"
"658","WP_079180155","WP_079180155_1","WP_079180155_1","Mycobacterium","none","none","WP_079180155_1","Mycobacterium tuberculosis","1284","1","10.52","yes","FQQGNKSTEENIVQLKNKVGETNT*NGTSDC","WP_079180155_1","none"
"659","SGI74060","SGI74060_1","SGI74060_1","Mycobacterium","none","none","SGI74060_1","Mycobacterium tuberculosis","1317","1","10.52","yes","FQQGNKSTEENIVQLKNKVGETNT*NGTSDC","SGI74060_1","none"
"660","WP_085213387","WP_085213387_1","WP_085213387_1","Streptomyces","none","none","WP_085213387_1","Streptomyces sp. Amel2xC10","1170","1","8.47","yes","MLSFSGQVGSTATGGAFVQVAPGASTTCGGGNCSCTSCCSW","WP_085213387_1","none"
"661","SMF78969","SMF78969_1","SMF78969_1","Streptomyces","none","none","SMF78969_1","Streptomyces sp. Amel2xC10","2160","1","8.47","yes","MLSFSGQVGSTATGGAFVQVAPGASTTCGGGNCSCTSCCSW","SMF78969_1","none"
"662","RLV71217","RLV71217_2","RLV71217_2","Streptomyces","none","none","RLV71217_2","Streptomyces sp. CBMAI 2042","7516","2","2.04","yes","MVARHPRVRSGPRSGPVLRTGFRPFGGVTRRAVSPLGE","RLV71217_2","none"
"663","WP_073876556","WP_073876556_3","WP_073876556_3","Streptomyces","none","none","WP_073876556_3","Streptomyces sp. CB00316","7463","3","1.24","yes","MVARHPRVRTGPLPGPGGRTGFRPFGGVTRRAVSPLGE","WP_073876556_3","none"
"664","OBA55656","OBA55656_3","OBA55656_3","Corynebacterium","none","none","OBA55656_3","Corynebacterium sp. EPI-003-04-2554_SCH2473622","2295","3","16.17","no","MISNLEEWIEAPEHHGELIEGKDHYTSDTKTEVLAMSGATIDCYLKNEREKLELKGDINNETRGFAP","OBA55656_3","none"
"665","WP_064833209","WP_064833209_2","WP_064833209_2","Corynebacterium","none","none","WP_064833209_2","Corynebacterium sp. EPI-003-04-2554_SCH2473622","2229","2","16.17","no","MISNLEEWIEAPEHHGELIEGKDHYTSDTKTEVLAMSGATIDCYLKNEREKLELKGDINNETRGFAP","WP_064833209_2","none"
"666","SCD31130","SCD31130_1","SCD31130_1","Streptomyces","Transcriptional regulator PadR-like family","PF03551.14","SCD31130_1","Streptomyces sp. di50b","843","1","51.57","no","MAIDKRASWLKGVLDLLVLSCLTSGESYGYEIARRLDDAGLGQIKGGTLYPVLNRLEEASLVQAEFRAAERGPGRRYYQLTAEGRRYLREQGDAWLGFHRTVKEMLDKGESNT","SCD31130_1","2.60E-24"
"667","WP_093544729","WP_093544729_1","WP_093544729_1","Streptomyces","Transcriptional regulator PadR-like family","PF03551.14","WP_093544729_1","Streptomyces sp. di188","843","1","51.57","no","MAIDKRASWLKGVLDLLVLSCLTSGESYGYEIARRLDDAGLGQIKGGTLYPVLNRLEEASLVQAEFRAAERGPGRRYYQLTAEGRRYLREQGDAWLGFHRTVKEMLDKGESNT","WP_093544729_1","2.60E-24"
"668","WP_055578070","WP_055578070_5","WP_055578070_5","Mycobacterium","none","none","WP_055578070_5","Mycobacterium gordonae","417","5","10.24","yes","MPALFSAFRNALPNMSAWIGAATVADTPNTPAARARSRKAIAGAVIVTTVLNNCHNRNTVR","WP_055578070_5","none"
"669","RUP01435","RUP01435_5","RUP01435_5","Mycobacterium","none","none","RUP01435_5","Mycobacterium sp.","569","5","16.9","yes","MVNAAARSRGRLLSSAISDTMESNDPPGESALGQTERPSATAVAGWLYGTPALVSAFRNAFPSMSAWIGAATVADTPNTPVARARSLRAIAGAVIVTTVLNNCHIRNTVR","RUP01435_5","none"
"670","ROS45991","ROS45991_2","ROS45991_2","Curtobacterium","none","none","ROS45991_2","Curtobacterium sp. PhB78","234","2","2.37","yes","MSLAVAAVTGSWWIVLPLVLTAVTVHSCALRAALRRSVDSWSVTCFLIAMVIAWGASVLPIAWVWPAAGSLAAGTCFGYVLALRHADRLTIGSGRS","ROS45991_2","none"
"671","WP_017559667","WP_017559667_3","WP_017559667_3","Nocardiopsis","none","none","WP_017559667_3","Nocardiopsis baichengensis YIM 90130","1642","3","13.65","yes","MTSRVYPLYGRLRFGAGLDVSALRHAT","WP_017559667_3","none"
"672","WP_131965735","WP_131965735_3","WP_131965735_3","Actinomadura","Domain of unknown function (DUF5134)","PF17197.4","WP_131965735_3","Actinomadura sp. KC06","2888","3","8.81","no","MWYDGWFRTTVWLLQVPVAALLLTRLLSPAYRPGQGRLDGVGRLVARVGAAATIGVVLAVAASGRDGGRTPGVEGAEPAVTRPMIWIGLAVFAVAVTVAVCRVRRLSPSRQVTSVRE","WP_131965735_3","7.20E-08"
"673","WP_131965734","WP_131965734_2","WP_131965734_2","Actinomadura","Domain of unknown function (DUF5134)","PF17197.4","WP_131965734_2","Actinomadura sp. KC06","4117","2","8.81","no","MWYDGWFRTTVWLLQVPVAALLLTRLLSPAYRPGQGRLDGVGRLVARVGAAATIGVVLAVAASGRDGGRTPGVEGAEPAVTRPMIWIGLAVFAVAVTVAVCRVRRLSPSRQVTSVRE","WP_131965734_2","7.20E-08"
"674","WP_051777853","WP_051777853_1","WP_051777853_1","Streptomyces","none","none","WP_051777853_1","Streptomyces violaceorubidus","2039","1","25.86","no","MNRDDKQLLRRRVYGADHDHPGPRPDRRYAELVGGPLDGLLLDITGWRPEEIDDGVSLLTELGQFGPGGRALYDPRPGDPGRFDWTGDTPQLPDCPGQSPA","WP_051777853_1","none"
"675","WP_100861846","WP_100861846_2","WP_100861846_2","Streptomyces","none","none","WP_100861846_2","Streptomyces sp. Ag109_G2-1","7768","2","18.29","yes","MYGSEPDARDTGPKPGHSYVELVGGPLDGMLLDVTGWPPQEVVDGALLMSDHGAFGPGGRSDYVPAEGDGGEAGRFVWRGDVP","WP_100861846_2","none"
"676","WP_082248115","WP_082248115_3","WP_082248115_3","Bifidobacterium","Protein of unknown function (DUF2975)","PF11188.8","WP_082248115_3","Bifidobacterium longum subsp. infantis","5886","3","12.61","yes","MLLALKAIVILVWLACLWGQLLAVPGLSGALAGLYPSQTSMHWPYLIMGVLFLLCIEAAFVAVWKLFSLSGSGANSSR","WP_082248115_3","3.30E-11"
"677","OQM68597","OQM68597_3","OQM68597_3","Bifidobacterium","Protein of unknown function (DUF2975)","PF11188.8","OQM68597_3","Bifidobacterium longum subsp. infantis","5886","3","12.61","yes","MLLALKAIVILVWLACLWGQLLAVPGLSGALAGLYPSQTSMHWPYLIMGVLFLLCIEAAFVAVWKLFSLSGSGANSSR","OQM68597_3","3.30E-11"
"678","WP_080684945","WP_080684945_1","WP_080684945_1","Bifidobacterium","Protein of unknown function (DUF2975)","PF11188.8","WP_080684945_1","Bifidobacterium breve","5277","1","30.11","yes","MKNYMNRWVLLALKAIVILVWLACLWGQLLAVPGLSGALAGLYPSQTSMHWPYLIMGVLFLLCIEAAFVAVWKLFSLSGSGANSSR","WP_080684945_1","8.60E-11"
"679","WP_080909324","WP_080909324_1","WP_080909324_1","Rhodococcus","Short C-terminal domain","PF09851.9","WP_080909324_1","Rhodococcus sp. 66b","7476","1","33.15","yes","MSFLRRAGRVAVASSIHGNVQRRQRTRWAAEDQARAAQVQPVPPIPDLPPLPPQAAPAESEMSMDAKLEQLTKLGELKNAGVLTEAEFETQKARILA","WP_080909324_1","4.70E-13"
"680","WP_124566915","WP_124566915_1","WP_124566915_1","Rhodococcus","Short C-terminal domain","PF09851.9","WP_124566915_1","Rhodococcus sp. KBW08","7468","1","34.9","yes","MSFLRRAGRVAVASSIHGNVQRRQRTRWAAEDQARAAQAQPVPPIPDLPPLPPQAAPTASMDAKIEQLTKLGELKNAGVLTDAEFETQKARILA","WP_124566915_1","2.70E-13"
"681","WP_075831737","WP_075831737_1","WP_075831737_1","Rhodococcus","Short C-terminal domain","PF09851.9","WP_075831737_1","Rhodococcus sp. YL-0","7468","1","28.3","yes","MSFLRRAGRVAVASSIHGNVQRRQRTRWAAEDQARAAQAQPVPPIPDLPPLPPQAAPAASMDLKLEQLTKLGELKNAGVLTEAEFETQKARILA","WP_075831737_1","2.20E-13"
"682","WP_091216389","WP_091216389_3","WP_091216389_3","Geodermatophilus","none","none","WP_091216389_3","Geodermatophilus siccatus","7833","3","20.97","no","MSDPGPGSPNELDVDPEVALGPGEEGAEPLPEPIVDPGHPDYVEPAPYAVPAPEDTGR","WP_091216389_3","none"
"683","SDL97273","SDL97273_3","SDL97273_3","Geodermatophilus","none","none","SDL97273_3","Geodermatophilus siccatus","7821","3","20.97","no","MSDPGPGSPNELDVDPEVALGPGEEGAEPLPEPIVDPGHPDYVEPAPYAVPAPEDTGR","SDL97273_3","none"
"684","WP_030701973","WP_030701973_2","WP_030701973_2","Streptomyces","none","none","WP_030701973_2","Streptomyces griseus subsp. griseus","7128","2","1.91","yes","MGEAGAGAVRPEPGGDPGHFIGNDNHV","WP_030701973_2","none"
"685","KPI20077","KPI20077_3","KPI20077_3","Actinobacteria","none","none","KPI20077_3","Actinobacteria bacterium OK074","103","3","14.15","yes","MSVESSSLKHEVKSAGAAVSLKRDVKSVGVATCLKRDVKSVGAAVAPR","KPI20077_3","none"
"686","WP_054213495","WP_054213495_3","WP_054213495_3","Actinobacteria","none","none","WP_054213495_3","Actinobacteria bacterium OK074","211","3","14.15","yes","MSVESSSLKHEVKSAGAAVSLKRDVKSVGVATCLKRDVKSVGAAVAPR","WP_054213495_3","none"
"687","WP_119105432","WP_119105432_2","WP_119105432_2","Streptomyces","none","none","WP_119105432_2","Streptomyces sp. NEAU-SSA 1","4","2","6.85","yes","MSQVVRQQVASTGAANAVKTSVHSAGAANSVKRRVSSSGAANAVKSSVSSAGAANAVR","WP_119105432_2","none"
"688","WP_051338384","WP_051338384_1","WP_051338384_1","Streptomyces","none","none","WP_051338384_1","Streptomyces flavidovirens DSM 40150","1","1","30.98","yes","MNAFEMEDQDEQFVLNNCVSAYLADDNEEFVVDNCVAAYLS","WP_051338384_1","none"
"689","WP_125314889","WP_125314889_1","WP_125314889_1","Amycolatopsis","none","none","WP_125314889_1","Amycolatopsis sp. GLM-1","1","1","32.09","yes","MKQEQFSTETAPEALVVNTCVAASLVVNTCVAASLTVNTCVAAYLPER","WP_125314889_1","none"
"690","WP_106674009","WP_106674009_1","WP_106674009_1","Streptosporangium","Tim10/DDP family zinc finger","PF02953.15","WP_106674009_1","Streptosporangium nondiastaticum","4","1","41.22","yes","MNEQIIVNNCVAAYVDTDEVIVNNCVAAYVDTDELVVNNCVAAYV","WP_106674009_1","8.50E-05"
"691","REF98980","REF98980_2","REF98980_2","Asanoa","none","none","REF98980_2","Asanoa ferruginea","33","2","54.32","yes","MFKRGEAFFCFHPADQPSLRGGSVSPCFHPGEDAGVNLCHHAAEPGNGAGCFHPSDDVNCCYHPADNDLAVDLHLALTGIDERHLATLTP","REF98980_2","none"
"692","SCG59471","SCG59471_1","SCG59471_1","Micromonospora","none","none","SCG59471_1","Micromonospora coxensis","8","1","12.86","yes","MPAGDFCLHSGHGDGEPMARRSGPGGGTLCFHPADADGEPMARHAEPGGGGGTCCFHPGDADGEPVARHAEPGGGGGSMCFHPGGEDGASARLADDLAADLHLALTSIDDRQLAMLA","SCG59471_1","none"
"693","WP_053652832","WP_053652832_3","WP_053652832_3","Micromonospora","none","none","WP_053652832_3","Micromonospora sp. NRRL B-16802","30","3","20.99","yes","MSTEEKFFHPGAENGELMARSGSPGGGTLCFHPGDEEGASMTRLADDLAADLHLALTSIDDRQLALLA","WP_053652832_3","none"
"694","WP_069774196","WP_069774196_3","WP_069774196_3","Streptomyces","DDE superfamily endonuclease","PF13546.6","WP_069774196_3","Streptomyces agglomeratus","5506","3","17.18","yes","MSLLQHGVPRDAFAELSCFRTEFYACLTGRRDALFELSDALLCADGPVRTLVELSLEPEHRRGHGACMAA","WP_069774196_3","2.50E-09"
"695","SDE51953","SDE51953_4","SDE51953_4","Glycomyces","DDE superfamily endonuclease","PF13546.6","SDE51953_4","Glycomyces harbinensis","4402","4","12.07","no","MSILPEPGTGAGAGALRDFRAGFHQCLTARSDALFELTDAVLCSSGPVVSLPGLSLTGVFTRGHGALYDALSAGRIDADRF","SDE51953_4","1.30E-08"
"696","WP_091040567","WP_091040567_5","WP_091040567_5","Glycomyces","DDE superfamily endonuclease","PF13546.6","WP_091040567_5","Glycomyces harbinensis","4396","5","12.07","no","MSILPEPGTGAGAGALRDFRAGFHQCLTARSDALFELTDAVLCSSGPVVSLPGLSLTGVFTRGHGALYDALSAGRIDADRF","WP_091040567_5","1.30E-08"
"697","WP_116154877","WP_116154877_6","WP_116154877_6","Streptomyces","none","none","WP_116154877_6","Streptomyces sp. 3212.4","2083","6","21.36","yes","MKHGTAPARDQRPPLTYMTIRVYQVDRYGTITADRGKVLVPPAQELEASTAFPPCECPRHRAGQAVHQ","WP_116154877_6","none"
"698","RED74809","RED74809_6","RED74809_6","Streptomyces","none","none","RED74809_6","Streptomyces sp. 67","2044","6","21.36","yes","MKHGTAPARDQRPPLTYMTIRVYQVDRYGTITADRGKVLVPPAQELEASTAFPPCECPRHRAGQAVHQ","RED74809_6","none"
"699","PKV33869","PKV33869_6","PKV33869_6","Streptomyces","none","none","PKV33869_6","Streptomyces sp. 59","2045","6","21.55","yes","MKHGTAPTRDQRPPLTYMTIRVYQVDRYGTVTADRGKVLVPPAQELEASTAFPPCECPRHRAGQAVHQ","PKV33869_6","none"
"700","WP_043591397","WP_043591397_2","WP_043591397_2","Frankia","none","none","WP_043591397_2","Frankia sp. KB5","3973","2","5.05","no","MXGTGRXRAGMNPVETVTVEDVRETDGTDGHGLHWLTKVRSAPSVNRRHYSSSSHANGLWTSACVVGSCGAARTGASASSSNEISAMLHLLRNKTVFVFKRNASTSDVGMG","WP_043591397_2","none"
"701","WP_108913844","WP_108913844_2","WP_108913844_2","Frankia","none","none","WP_108913844_2","Frankia sp. B2","2672","2","7.02","no","MAGTGRARAGMNPVETVTVEDVRETDGTDGHGLHWLTKVRSAPSVNRRHYSSSSHANGLWTSACVVGSCGAARTGASASSSNEISAMLHLLRNKTVFVFKRNASTSDVGMG","WP_108913844_2","none"
"702","WP_076804070","WP_076804070_2","WP_076804070_2","Frankia","none","none","WP_076804070_2","Frankia sp. CcI156","2478","2","7.19","no","MGWLRPAGVMAGTGRARAGMNPVETVTVEDVRETDGTDGHGLHWLTKVRSAPSVNRRHYSSSSHANGLWTSACVVGSCGAARTGASASSSNEISAMLHLLRNKTVFVFKRNASTSDVGMG","WP_076804070_2","none"
"703","WP_107120384","WP_107120384_3","WP_107120384_3","Streptomyces","none","none","WP_107120384_3","Streptomyces antibioticus","3530","3","11.07","no","MPTESRACERIQTARNRLSDASTGDTDVLEGGFGTLASVLAKPGNGRTALNGFLRSLPAEDPCDTVTVADWLRDREPSVRDRSQAKRVSMTAAAARWCGRRPVGERGRGR","WP_107120384_3","none"
"704","KUN25245","KUN25245_3","KUN25245_3","Streptomyces","none","none","KUN25245_3","Streptomyces antibioticus","3404","3","11.07","no","MPTESRACERIQTARNRLSDASTGDTDVLEGGFGTLASVLAKPGNGRTALNGFLRSLPAEDPCDTVTVADWLRDREPSVRDRSQAKRVSMTAAAARWCGRRPVGERGRGR","KUN25245_3","none"
"705","WP_059193363","WP_059193363_3","WP_059193363_3","Streptomyces","none","none","WP_059193363_3","Streptomyces antibioticus","4826","3","11.07","no","MPTESRACERIQTARNRLSDASTGDTDVLEGGFGTLASVLAKPGNGRTALNGFLRSLPAEDPCDTVTVADWLRDREPSVRDRSQAKRVSMTAAAARWCGRRPVGERGRGR","WP_059193363_3","none"
"706","WP_081900771","WP_081900771_1","WP_081900771_1","Allokutzneria","YCII-related domain","PF03795.14","WP_081900771_1","Allokutzneria albata","161","1","62.67","no","MQYMLLICGDESAAEHAEDGCGGWSEEMEARGVIRGGGGLRPPTDATTVRVRDEQLLLSDGPFAETKEQIGGFCLIECADLDEAIEIASKHPAASYGTIEIRPLIQFP","WP_081900771_1","2.90E-23"
"707","SDM16976","SDM16976_1","SDM16976_1","Allokutzneria","YCII-related domain","PF03795.14","SDM16976_1","Allokutzneria albata","329","1","62.67","no","MQYMLLICGDESAAEHAEDGCGGWSEEMEARGVIRGGGGLRPPTDATTVRVRDEQLLLSDGPFAETKEQIGGFCLIECADLDEAIEIASKHPAASYGTIEIRPLIQFP","SDM16976_1","2.90E-23"
"708","WP_086828879","WP_086828879_1","WP_086828879_1","Allokutzneria","YCII-related domain","PF03795.14","WP_086828879_1","Allokutzneria sp. NRRL B-24872","156","1","62.98","no","MHYMLLICGDESAAEHAQDGCGGWSEEMEARGVIRGGAGLRPPTDATTVRVREDQLVLSDGPFAETKEQIGGFCLIECADLDEAIEIASKHPAAGYGTIEIRPLIQFP","WP_086828879_1","4.30E-23"
"709","WP_083715654","WP_083715654_5","WP_083715654_5","Amycolatopsis","none","none","WP_083715654_5","Amycolatopsis keratiniphila","4002","5","11.58","no","MDGSGKGWVAGGDVGRAGHPPVSPRSAAEPGQQRLEADPAEAMDPPVETVLPTVPAEPKEPPVLAEPAQQSAATVATFSSTQRSRVASRFRFVSMILSFA","WP_083715654_5","none"
"710","ONF71727","ONF71727_5","ONF71727_5","Amycolatopsis","none","none","ONF71727_5","Amycolatopsis keratiniphila subsp. keratiniphila","4001","5","11.76","no","MDGNGKGWVAGGDVGRAGHPPVSPRSAAEPGQQRLEADPAEAMDPPVETVLPTVPAEPKDPPVLAEPAQQSAATVATFSSTQRSRVASRFRFVSMILSFA","ONF71727_5","none"
"711","WP_072028150","WP_072028150_2","WP_072028150_2","Amycolatopsis","none","none","WP_072028150_2","Amycolatopsis keratiniphila subsp. nogabecina","1962","2","11.58","no","MDGSGKGWVAGGDVGRAGHPPVSPRSAAEPGQQRLEADPAEAMDPPVETVLPTVPAEPKEPPVLAEPAQQSAATVATFSSTQRSRVASRFRFVSMILSFA","WP_072028150_2","none"
"712","WP_076843253","WP_076843253_2","WP_076843253_2","Frankia","none","none","WP_076843253_2","Frankia sp. BMG5.30","7949","2","23.6","yes","MIALPVGTGIEAFACRGRGRAERREAFTRPRRGLSNLTNVSDVTNGMRGVPATWAVK","WP_076843253_2","none"
"713","WP_076843254","WP_076843254_2","WP_076843254_2","Frankia","none","none","WP_076843254_2","Frankia sp. BMG5.30","6602","2","23.6","yes","MIALPVGTGIEAFACRGRGRAERREAFTRPRRGLSNLTNVSDVTNGMRGVPATWAVK","WP_076843254_2","none"
"714","KLL12571","KLL12571_3","KLL12571_3","Frankia","none","none","KLL12571_3","Frankia coriariae","7937","3","23.6","yes","MIALPVGTGIEAFACRGRGRAERREAFTRPRRGLSNLTNVSDVTNGMRGVPATWAVK","KLL12571_3","none"
"715","WP_127571148","WP_127571148_1","WP_127571148_1","Georgenia","Chorismate mutase type II","PF01817.21","WP_127571148_1","Georgenia sp. ZLJ0321","6049","1","69.04","no","MSENPGVVPPELAQARGTIDNIDAALVHLLAERFKCTQRVGVLKADLGLPASDPAREARQVDRLRRLAEEAGLDPVFAEKFLAFIVEEVIRHHVEAAETRARS","WP_127571148_1","8.80E-21"
"716","EFF80328","EFF80328_1","EFF80328_1","Schaalia","Chorismate mutase type II","PF01817.21","EFF80328_1","Schaalia odontolytica F0309","6022","1","58.1","yes","MAQRDEASVAASADLGVSGVPAELADARATIDNIDAALVHILAERFRCTQRVGHIKARLDLPPADPAREARQVERLRTLAASSGLDPDFAEKFLGFMVREVIRHHEDIKAEYNEGPRL","EFF80328_1","2.00E-20"
"717","WP_082163142","WP_082163142_1","WP_082163142_1","Kytococcus","Chorismate mutase type II","PF01817.21","WP_082163142_1","Kytococcus sedentarius","5949","1","37.62","yes","MDQREDARAAAPADRGVEGVPAELADARATIDNIDAALIHILAERFRCTQRVGHIKARLNLPPADPAREARQVERLRALALSSGLDPDFAEKFLGFMVREVIRHHEDIKAEYDEGAAL","WP_082163142_1","1.10E-20"
"718","EWM64891","EWM64891_1","EWM64891_1","Micromonospora","Phosphopantetheine attachment site","PF00550.25","EWM64891_1","Micromonospora sp. M42","3312","1","29.27","yes","MDSSEVLETVSGFWRELLETDAVDVDHDFIAAGGDSLLAVELLARLEGTFPDAGFDDPANVGWLTIRATAEQIVARSSTRSAIDAGSGD","EWM64891_1","6.30E-13"
"719","WP_082931047","WP_082931047_1","WP_082931047_1","Micromonospora","Phosphopantetheine attachment site","PF00550.25","WP_082931047_1","Micromonospora sp. NBRC 110037","3311","1","29.27","yes","MDSSEVLETVSGFWRELLETDAVDVDHDFIAAGGDSLLAVELLARLEGTFPDAGFDDPANVGWLTIRATAEQIVARSSTRSAIDAGSGD","WP_082931047_1","6.30E-13"
"720","WP_083296959","WP_083296959_1","WP_083296959_1","Micromonospora","Phosphopantetheine attachment site","PF00550.25","WP_083296959_1","Micromonospora sp. LB41","3312","1","29.27","yes","MDSSEVLETVSGFWRELLETDAVDVDHDFIAAGGDSLLAVELLARLEGTFPDAGFDDPANVGWLTIRATAEQIVARSSTRSAIDAGSGD","WP_083296959_1","6.30E-13"
"721","WP_083296959","WP_083296959_3","WP_083296959_3","Micromonospora","none","none","WP_083296959_3","Micromonospora sp. LB41","3600","3","0.94","yes","MPPTTHLTGKGALWMMRDVLTAPVADGRGER","WP_083296959_3","none"
"722","WP_082931047","WP_082931047_3","WP_082931047_3","Micromonospora","none","none","WP_082931047_3","Micromonospora sp. NBRC 110037","3599","3","0.94","yes","MPPTTHLTGKGALWMMRDVLTAPVADGRGER","WP_082931047_3","none"
"723","EWM64891","EWM64891_3","EWM64891_3","Micromonospora","none","none","EWM64891_3","Micromonospora sp. M42","3600","3","0.94","yes","MPPTTHLTGKGALWMMRDVLTAPVADGRGER","EWM64891_3","none"
"724","WP_099279259","WP_099279259_5","WP_099279259_5","Streptomyces","Transposase DDE domain","PF01609.21","WP_099279259_5","Streptomyces sp. AmelKG-E11A","3355","5","8.11","no","MHDSQGLEPLVRGIPPIRSRRGPRRRKPGKLHGDKGYDYRHLRQWLRAQGVTHRLARRGAESSTRPGRHRWVVERSMAWLAGCRRLHRRYERKAEHFLACTAIACTLICYRQLAK","WP_099279259_5","3.80E-11"
"725","WP_134664144","WP_134664144_5","WP_134664144_5","Streptomyces","Transposase DDE domain","PF01609.21","WP_134664144_5","Streptomyces sp. S501","5723","5","11.38","yes","MITGHQTRHDPHRGRYFKPQRLHADKAYDVPHLRKWLWGKHIGVRIARKGIESSERLGRRRWVIERTMSWLTGYRRLNHRYERQPRNYLAFLGLAAALCCYKRLARLTT","WP_134664144_5","9.90E-12"
"726","WP_134664144","WP_134664144_7","WP_134664144_7","Streptomyces","Transposase DDE domain","PF01609.21","WP_134664144_7","Streptomyces sp. S501","6591","7","7.82","yes","MKGIPPIRSRRGWRRRKPGKLHADKGYDYAHLRRWLRERGITHRIARKGVESSQRLGRHRWTVERTMAWLAGCRRLHRRYERKADHFLAFTSIACTLICYRRLTK","WP_134664144_7","2.10E-10"
"727","WP_098695120","WP_098695120_3","WP_098695120_3","Nocardia","none","none","WP_098695120_3","Nocardia terpenica","1584","3","18.1","no","MKMMKRNEEVAESGYDDFDLNIIDSSMFDDESSRPAAPACHTLSSLPCCAN","WP_098695120_3","none"
"728","WP_082871442","WP_082871442_2","WP_082871442_2","Nocardia","none","none","WP_082871442_2","Nocardia terpenica","1552","2","16.51","no","MKMMKRNEEVAESGYDDFDLNIIDSSMFDDESSRPAAPACHTLSSLPCCAN","WP_082871442_2","none"
"729","KZM72684","KZM72684_2","KZM72684_2","Nocardia","none","none","KZM72684_2","Nocardia terpenica","1585","2","16.51","no","MKMMKRNEEVAESGYDDFDLNIIDSSMFDDESSRPAAPACHTLSSLPCCAN","KZM72684_2","none"
"730","SDH11838","SDH11838_5","SDH11838_5","Sinosporangium","none","none","SDH11838_5","Sinosporangium album","5337","5","20.51","yes","MGYGTSMLGGGTSGALGRLKPEAPVVPPRMGGSGTGLGAAMAAGATVPLIAAARNTTVVRRLAMRMDSPPFIEVTPTRHDSYMKLDNYLK","SDH11838_5","none"
"731","WP_093170892","WP_093170892_5","WP_093170892_5","Sinosporangium","none","none","WP_093170892_5","Sinosporangium album","6749","5","20.51","yes","MGYGTSMLGGGTSGALGRLKPEAPVVPPRMGGSGTGLGAAMAAGATVPLIAAARNTTVVRRLAMRMDSPPFIEVTPTRHDSYMKLDNYLK","WP_093170892_5","none"
"732","WP_093170943","WP_093170943_3","WP_093170943_3","Sinosporangium","none","none","WP_093170943_3","Sinosporangium album","5349","3","20.51","yes","MGYGTSMLGGGTSGALGRLKPEAPVVPPRMGGSGTGLGAAMAAGATVPLIAAARNTTVVRRLAMRMDSPPFIEVTPTRHDSYMKLDNYLK","WP_093170943_3","none"
"733","WP_131103335","WP_131103335_2","WP_131103335_2","Ornithinimicrobium","Polysaccharide biosynthesis C-terminal domain","PF14667.6","WP_131103335_2","Ornithinimicrobium sp. HY008","952","2","45.33","yes","MSPSRNDLVLAPILLALGLSVFGGLVVWLITQSTGHALTSAAIGLVIGAAIYLLSVGSARKNERQLP","WP_131103335_2","1.10E-06"
"734","KLO64220","KLO64220_4","KLO64220_4","Dermacoccus","none","none","KLO64220_4","Dermacoccus sp. PE3","1091","4","20.39","yes","MKTFIGPIIIALVLSLLGAGAVWMTTENVGKALTAGGIGLALGLAIFVFTALGARKDAR","KLO64220_4","none"
"735","WP_082128669","WP_082128669_2","WP_082128669_2","Dermacoccus","none","none","WP_082128669_2","Dermacoccus sp. PE3","953","2","20.39","yes","MKTFIGPIIIALVLSLLGAGAVWMTTENVGKALTAGGIGLALGLAIFVFTALGARKDAR","WP_082128669_2","none"
"736","EWM64891","EWM64891_2","EWM64891_2","Micromonospora","none","none","EWM64891_2","Micromonospora sp. M42","2249","2","25.81","yes","MMTTTAQEMSAQNAEVSLNETAEESSIDNIEGLFEEVDLFSTALIQGGCTGGFTSL","EWM64891_2","none"
"737","WP_082931047","WP_082931047_2","WP_082931047_2","Micromonospora","none","none","WP_082931047_2","Micromonospora sp. NBRC 110037","2145","2","25.81","yes","MMTTTAQEMSAQNAEVSLNETAEESSIDNIEGLFEEVDLFSTALIQGGCTGGFTSL","WP_082931047_2","none"
"738","WP_083296959","WP_083296959_2","WP_083296959_2","Micromonospora","none","none","WP_083296959_2","Micromonospora sp. LB41","2180","2","25.81","yes","MMTTTAQEMSAQNAEVSLNETAEESSIDNIEGLFEEVDLFSTALIQGGCTGGFTSL","WP_083296959_2","none"
"739","WP_125547276","WP_125547276_1","WP_125547276_1","Streptomyces","none","none","WP_125547276_1","Streptomyces sp. WAC05292","2091","1","48.36","yes","MGNRFASAAACLALAIAGLTAAAGTAAADEQGTGTVRAAEQDGAADGAGTQQPVPDEVAELICRLQANLPNVPGLPNVPNLPALPNGPHPVPLPHCLVNGWQ","WP_125547276_1","none"
"740","CUM40551","CUM40551_5","CUM40551_5","Streptomyces","none","none","CUM40551_5","Streptomyces venezuelae","2253","5","23.91","yes","MRIRITSAVACLALTIAGLTVAAGSAAAVEQGEGQSAGQRAGLHGESQWPVPVPPEVGELICEIQANLPHLPHMPHLVPVPHCKPVNGWQ","CUM40551_5","none"
"741","WP_079037558","WP_079037558_6","WP_079037558_6","Streptomyces","none","none","WP_079037558_6","Streptomyces venezuelae","2116","6","23.91","yes","MRIRITSAVACLALTIAGLTVAAGSAAAVEQGEGQSAGQRAGLHGESQWPVPVPPEVGELICEIQANLPHLPHMPHLVPVPHCKPVNGWQ","WP_079037558_6","none"
"742","SDE51953","SDE51953_1","SDE51953_1","Glycomyces","Helix-turn-helix domain","PF12840.7","SDE51953_1","Glycomyces harbinensis","5708","1","52.76","no","MTGTDHSSDASTDGVLAALADPTRRRLLDLLADGGEATATALAERLPVSRQAVVKHLAVLAAAGLVVGGRVGREVRYSVRPEALNATAQWMAALASDWDRRLAAVKRAAEAAAPEADRG","SDE51953_1","1.60E-18"
"743","WP_091040567","WP_091040567_2","WP_091040567_2","Glycomyces","Helix-turn-helix domain","PF12840.7","WP_091040567_2","Glycomyces harbinensis","5708","2","52.76","no","MTGTDHSSDASTDGVLAALADPTRRRLLDLLADGGEATATALAERLPVSRQAVVKHLAVLAAAGLVVGGRVGREVRYSVRPEALNATAQWMAALASDWDRRLAAVKRAAEAAAPEADRG","WP_091040567_2","1.60E-18"
"744","WP_082822395","WP_082822395_1","WP_082822395_1","Mycobacterium","Helix-turn-helix domain","PF12840.7","WP_082822395_1","Mycobacterium sp. QIA-37","7887","1","42.05","yes","MTAVIDDDLWAAVGDPTRRRVFDLILNDGVATATTLSERLPVTRQAVTKHLAVLDKAGLVRATPQGREKQYRANGEQVARIAEQLSAVGAAWDRRLARIKHLAETIEKATS","WP_082822395_1","2.30E-15"
"745","WP_093170892","WP_093170892_2","WP_093170892_2","Sinosporangium","none","none","WP_093170892_2","Sinosporangium album","6807","2","47.58","no","MKGGLSMRIAKRLTTVVFLAAAISGTVAPAAMAAPNPVPLPPILGGTTGASGFSLPSAPLVPPPNMLVPYPNLTLPSLDVL","WP_093170892_2","none"
"746","WP_093170943","WP_093170943_1","WP_093170943_1","Sinosporangium","none","none","WP_093170943_1","Sinosporangium album","5407","1","47.58","no","MKGGLSMRIAKRLTTVVFLAAAISGTVAPAAMAAPNPVPLPPILGGTTGASGFSLPSAPLVPPPNMLVPYPNLTLPSLDVL","WP_093170943_1","none"
"747","SDH11838","SDH11838_2","SDH11838_2","Sinosporangium","none","none","SDH11838_2","Sinosporangium album","5395","2","47.58","no","MKGGLSMRIAKRLTTVVFLAAAISGTVAPAAMAAPNPVPLPPILGGTTGASGFSLPSAPLVPPPNMLVPYPNLTLPSLDVL","SDH11838_2","none"
"748","WP_132619812","WP_132619812_2","WP_132619812_2","Saccharopolyspora","none","none","WP_132619812_2","Saccharopolyspora sp. 16K404","132","2","13.91","yes","MGAVNGDMAVAQQPEGTLLTATEEALAAELETTTTNSAPEDA","WP_132619812_2","none"
"749","WP_009951067","WP_009951067_2","WP_009951067_2","Saccharopolyspora","none","none","WP_009951067_2","Saccharopolyspora erythraea NRRL 2338","4","2","23.51","yes","MGSAVSDMAVAQQPEGTLLTATEAALAAELETDTTNLAPEDA","WP_009951067_2","none"
"750","CAM04239","CAM04239_3","CAM04239_3","Saccharopolyspora","none","none","CAM04239_3","Saccharopolyspora erythraea NRRL 2338","130","3","23.51","yes","MGSAVSDMAVAQQPEGTLLTATEAALAAELETDTTNLAPEDA","CAM04239_3","none"
"751","WP_052318929","WP_052318929_1","WP_052318929_1","Streptomyces","SecE/Sec61-gamma subunits of protein translocatio","PF00584.20","WP_052318929_1","Streptomyces pluripotens","7169","1","30.63","no","MTEQDGWERKFDHRWANSAEHKEPSARARMLAARWKENPPGPVPFRADPGPVPRRSSWASTAVVLGCVIVVMVLIGIVELGSSR","WP_052318929_1","4.50E-07"
"752","AKJ13608","AKJ13608_3","AKJ13608_3","Streptomyces","none","none","AKJ13608_3","Streptomyces incarnatus","7670","3","35.17","no","MTEQDDWEREFDHRWANSAEHKEPSARARMLAARWKDNPPAPAPFRADPDPVPHRASWASTAVVFGCVIVVMVLLAVVQLSSAS","AKJ13608_3","none"
"753","KIE24863","KIE24863_1","KIE24863_1","Streptomyces","SecE/Sec61-gamma subunits of protein translocatio","PF00584.20","KIE24863_1","Streptomyces sp. MUSC 125","7169","1","30.63","no","MTEQDGWERKFDHRWANSAEHKEPSARARMLAARWKENPPGPVPFRADPGPVPRRSSWASTAVVLGCVIVVMVLIGIVELGSSR","KIE24863_1","4.50E-07"
"754","WP_125792333","WP_125792333_4","WP_125792333_4","Amycolatopsis","none","none","WP_125792333_4","Amycolatopsis sp. WAC 01376","4438","4","21.17","no","MRTDILDLSVNEITSNELSLGGLKSIDLSITELESAAAPDVASFLGGVSAATAVSALILT","WP_125792333_4","none"
"755","WP_093601012","WP_093601012_1","WP_093601012_1","Lentzea","none","none","WP_093601012_1","Lentzea waywayandensis","4543","1","36.61","no","MAKLDLSFDELSPIDLSVAELDRIATPDAGDFITGVSAGATVSTIFISLLT","WP_093601012_1","none"
"756","SFK92414","SFK92414_3","SFK92414_3","Amycolatopsis","none","none","SFK92414_3","Amycolatopsis sacchari","4850","3","28.63","no","MRDTRLDLSVSELGANELSVGGLGSIDLSITELESVATPDLSSFLQSVSASAAVSSLIIAT","SFK92414_3","none"
"757","WP_130490932","WP_130490932_1","WP_130490932_1","Motilibacter","ThiS family","PF02597.20","WP_130490932_1","Motilibacter rhizosphaerae","6393","1","42.44","yes","MAEITVRYWAAAREAAGVPEERVDASGVDAALAEAVARHGDRLERVLRIASLLVDGRRVQRTDPLALTAGSVVEVLPPFAGG","WP_130490932_1","2.10E-10"
"758","WP_129176857","WP_129176857_3","WP_129176857_3","Agromyces","ThiS family","PF02597.20","WP_129176857_3","Agromyces atrinae","13","3","29.45","no","MTVRVRLFAGAAEAIGQDEVTLADVTTLGDLVARLVADFGSGVAPVLDRCSFLVDGVRAADAETRVTGTVDVLPPFAGG","WP_129176857_3","5.70E-10"
"759","WP_053775070","WP_053775070_2","WP_053775070_2","Clavibacter","ThiS family","PF02597.20","WP_053775070_2","Clavibacter michiganensis subsp. capsici","5079","2","41.71","no","MIVPVELFAAASAALGRTTDALDLPDGATLGDLVDALGIRASASEDPANAAAVLARCTYLVEGVATTDREAPLIAGSAVDVLPPFSGG","WP_053775070_2","1.70E-12"
"760","WP_070795263","WP_070795263_3","WP_070795263_3","Corynebacterium","none","none","WP_070795263_3","Corynebacterium diphtheriae bv. mitis","1773","3","4.77","no","MPPGPGQVPIELFEYVTVFGGITPGSFFNRDRNKPYRSQRLVPLSFRAAGTDINIARLLGWAGYESSVPWGGTANNVMAWDKGF","WP_070795263_3","none"
"761","WP_088246551","WP_088246551_3","WP_088246551_3","Corynebacterium","none","none","WP_088246551_3","Corynebacterium diphtheriae bv. gravis","1774","3","4.77","no","MPPGPGQVPIELFEYVTVFGGITPGSFFNRDRNKPYRSQRLVPLSFRAAGTDINIARLLGWAGYESSVPWGGTANNVMAWDKGF","WP_088246551_3","none"
"762","OMO45941","OMO45941_2","OMO45941_2","Corynebacterium","none","none","OMO45941_2","Corynebacterium diphtheriae","1774","2","6.9","no","MPPGLGQVPIELLEYVTAFGDITPGSFFNRDRNKPYRSQRLVPLSFRAAGTDINIVRLLGWTGYVSSVPWGGTANNVMAWDKGF","OMO45941_2","none"
"763","EME16460","EME16460_2","EME16460_2","Rhodococcus","none","none","EME16460_2","Rhodococcus triatomae BKS 15-14","3509","2","6.43","yes","MLVSIHLFEHRDFHHRVLVSRVGAGAETIVFCVASEAGVCACSCSQAG","EME16460_2","none"
"764","WP_007536321","WP_007536321_2","WP_007536321_2","Rhodococcus","none","none","WP_007536321_2","Rhodococcus triatomae BKS 15-14","4819","2","6.43","yes","MLVSIHLFEHRDFHHRVLVSRVGAGAETIVFCVASEAGVCACSCSQAG","WP_007536321_2","none"
"765","WP_043809367","WP_043809367_2","WP_043809367_2","Rhodococcus","none","none","WP_043809367_2","Rhodococcus triatomae BKS 15-14","3509","2","6.43","yes","MLVSIHLFEHRDFHHRVLVSRVGAGAETIVFCVASEAGVCACSCSQAG","WP_043809367_2","none"
"766","WP_110565442","WP_110565442_9001","WP_110565442_9001","Micromonospora","thiazolyl_B: thiazolylpeptide-type bacteriocin","NF033400.3","WP_110565442_9001","Micromonospora arborensis","13412","9001","25.95","no","MSISAQTQVEFGVEELTGLDIDTLEISDYLDESMLDTHDLTETMIASASCTTCICTCSCSS","WP_110565442_9001","0.00075"
"767","WP_074475319","WP_074475319_9003","WP_074475319_9003","Micromonospora","thiazolyl_B: thiazolylpeptide-type bacteriocin","NF033400.3","WP_074475319_9003","Micromonospora carbonacea","13456","9003","32.24","no","MSISVDPQTELGVEELTGLDIDTLEISDYLDESMLDTHDLTETMIASASCTTCICTCSCSS","WP_074475319_9003","0.00079"
"768","WP_091614694","WP_091614694_9002","WP_091614694_9002","Amycolatopsis","thiazolyl_BerA: thiocillin/thiostrepton family th","NF033401.1","WP_091614694_9002","Amycolatopsis saalfeldensis","9500","9002","23.87","yes","MSAPTSIQANVGVAGLTGLDTDTLEISDYLDETLLDSHDLTETMASSSSCTTCICTCSCSS","WP_091614694_9002","1.30E-19"
"769","WP_061300719","WP_061300719_1","WP_061300719_1","Herbidospora","DprA winged helix domain","PF17782.1","WP_061300719_1","Herbidospora cretacea","5566","1","52.78","yes","MYARDNEAGAKPPQEQPTSAQVELAVEAFRMLGDATRLRLMWLLSASEYDVNSLAEAIAAPRPSVSQHLAKLRLAGLVRTRREGRRVLYRARDAHVRRLIGEALFHAGHEVSGIPRHD","WP_061300719_1","2.00E-06"
"770","WP_061300720","WP_061300720_1","WP_061300720_1","Herbidospora","DprA winged helix domain","PF17782.1","WP_061300720_1","Herbidospora cretacea","6809","1","52.78","yes","MYARDNEAGAKPPQEQPTSAQVELAVEAFRMLGDATRLRLMWLLSASEYDVNSLAEAIAAPRPSVSQHLAKLRLAGLVRTRREGRRVLYRARDAHVRRLIGEALFHAGHEVSGIPRHD","WP_061300720_1","2.00E-06"
"771","WP_061300721","WP_061300721_1","WP_061300721_1","Herbidospora","DprA winged helix domain","PF17782.1","WP_061300721_1","Herbidospora cretacea","7990","1","52.78","yes","MYARDNEAGAKPPQEQPTSAQVELAVEAFRMLGDATRLRLMWLLSASEYDVNSLAEAIAAPRPSVSQHLAKLRLAGLVRTRREGRRVLYRARDAHVRRLIGEALFHAGHEVSGIPRHD","WP_061300721_1","2.00E-06"
"772","WP_092888237","WP_092888237_1","WP_092888237_1","Actinopolymorpha","none","none","WP_092888237_1","Actinopolymorpha cephalotaxi","1476","1","46.95","yes","MADKATRDVVRSLDLNAEQQSALGEVISASVAVNVYRQLGTQAADSSGCNIIGNCSSCSKLVADAING","WP_092888237_1","none"
"773","WP_092888237","WP_092888237_3","WP_092888237_3","Actinopolymorpha","none","none","WP_092888237_3","Actinopolymorpha cephalotaxi","844","3","39.76","yes","MTDTSPARRVVGELDLTVEQRRALAEAAVSTVAVEVYRQLQMQGQGTDDMAGSCAIIGNCSGGPGCDIIGNCSSSKLVSVEELI","WP_092888237_3","none"
"774","WP_135971800","WP_135971800_3","WP_135971800_3","Cellulomonas","none","none","WP_135971800_3","Cellulomonas sp. Z28","1107","3","38.16","yes","MSEDAIFSLRELKLTAVQQRGLEETVAASVAVNVYRQLEDLRASNSGCNIIGNCSSSSSKLVGETVER","WP_135971800_3","none"
"775","WP_092807119","WP_092807119_3","WP_092807119_3","Klenkia","none","none","WP_092807119_3","Klenkia marina","667","3","31.76","yes","MWALLSSRLRTWLLLTVAVPLVSRLLRTAGQRLEARRGPSNLSRGLRKAGDLTGRVARKGAATAADAATGTRRAA","WP_092807119_3","none"
"776","WP_091247291","WP_091247291_2","WP_091247291_2","Klenkia","none","none","WP_091247291_2","Klenkia soli","3078","2","30.0","yes","MWALLSRRLRTWVLLTVAVPLVSRLLRGAGQRLEAKRGPSGLSRGLRKAGDLTGRVARTGAATATDAATGTRRAA","WP_091247291_2","none"
"777","SCX58064","SCX58064_3","SCX58064_3","Klenkia","none","none","SCX58064_3","Klenkia marina","901","3","31.76","yes","MWALLSSRLRTWLLLTVAVPLVSRLLRTAGQRLEARRGPSNLSRGLRKAGDLTGRVARKGAATAADAATGTRRAA","SCX58064_3","none"
"778","SFI84698","SFI84698_2","SFI84698_2","Streptosporangium","none","none","SFI84698_2","Streptosporangium canum","2","2","29.88","yes","MGNSNSNGQSLLKPDGFQLEDGFSFTLAETMLLDQFFTARPVPGAL","SFI84698_2","none"
"779","ACZ89043","ACZ89043_3","ACZ89043_3","Streptosporangium","none","none","ACZ89043_3","Streptosporangium roseum DSM 43021","3","3","28.56","yes","MGNSNSNGQSLLKPDGFQLEDSFSFTLAETVLLDQFFAARSAPGAL","ACZ89043_3","none"
"780","WP_081937495","WP_081937495_2","WP_081937495_2","Streptosporangium","none","none","WP_081937495_2","Streptosporangium roseum","3","2","28.33","yes","MGNSNSNGQSLLKPDGFQLEDGFSFTLAETMLLDQFFTARPVPGAL","WP_081937495_2","none"
"781","WP_130329265","WP_130329265_1","WP_130329265_1","Streptomyces","none","none","WP_130329265_1","Streptomyces sp. BK022","3696","1","57.97","yes","MSFEFAEFGTERTAETAELINASSDNGRALINASSDNGRALINASSDNGRALINASSDNGRALINASSDNGRTAL","WP_130329265_1","none"
"782","WP_044386624","WP_044386624_1","WP_044386624_1","Streptomyces","none","none","WP_044386624_1","Streptomyces cyaneogriseus subsp. noncyanogenus","2199","1","12.4","yes","MMRERAMVPASSDNGRARAMVPASSDNGRARAMVPASSDNGRARAMVPASSDNGRARAMVPASSDNGRARAMVPASSDNGR","WP_044386624_1","none"
"783","WP_116150435","WP_116150435_1","WP_116150435_1","Streptomyces","Mucin-like","PF16058.5","WP_116150435_1","Streptomyces sp. 3212.4","3685","1","56.58","yes","MSFEFAEFGTDRTTEAAELINPSSDNGRALINPSSDNGRALINPSSDNGRALINPSSDNGRALINPSSDNGRALINPSSDNGRALINPSSDNGRALINPSSDNGRTTV","WP_116150435_1","4.60E-12"
"784","RKS80725","RKS80725_1","RKS80725_1","Motilibacter","Domain of unknown function (DUF4287)","PF14117.6","RKS80725_1","Motilibacter peucedani","5989","1","56.58","no","MSNGHSDETHAQLISRIPETTGRGLADWFKALEDGPSLVRFDERVEWLRTEHELSHGYAAAIVHEHDLQKAQRAFG","RKS80725_1","1.60E-29"
"785","WP_121191582","WP_121191582_1","WP_121191582_1","Motilibacter","Domain of unknown function (DUF4287)","PF14117.6","WP_121191582_1","Motilibacter peucedani","5989","1","56.58","no","MSNGHSDETHAQLISRIPETTGRGLADWFKALEDGPSLVRFDERVEWLRTEHELSHGYAAAIVHEHDLQKAQRAFG","WP_121191582_1","1.60E-29"
"786","WP_007495061","WP_007495061_1","WP_007495061_1","Streptomyces","Domain of unknown function (DUF4287)","PF14117.6","WP_007495061_1","Streptomyces zinciresistens K42","4698","1","45.67","no","MSQVFSEETHRNLLARIPHCTGREISDWLRAVDDGPALFNFEEKVSWLRHEHNLAYGHAKAIIHEYDLRRAARKLL","WP_007495061_1","1.20E-26"
"787","ESU58068","ESU58068_3","ESU58068_3","Corynebacterium","none","none","ESU58068_3","Corynebacterium ulcerans NCTC 12077","6799","3","1.15","no","MSRPCLLADANSSGNLDWNLDQPNAGANIRVRWESIRGDGGRVGGLRIFRSLFLRVLRPSNVAGQLPIAALLKESPSFLASEC","ESU58068_3","none"
"788","WP_046096646","WP_046096646_3","WP_046096646_3","Corynebacterium","none","none","WP_046096646_3","Corynebacterium ulcerans","6776","3","2.01","no","MSRPCLLADANSSGNLDWNLDQPNAGANIRVRWESIRGDGGRVGGLRIFRSLFLRVLRPSNVAGQLPIAALLKESPSFLASEC","WP_046096646_3","none"
"789","WP_087454414","WP_087454414_3","WP_087454414_3","Corynebacterium","none","none","WP_087454414_3","Corynebacterium sp. KL0182","6809","3","1.45","no","MSRPCLLVDANSSGSPDWNLGQPNAGANIHVRWESIRGDGGRVGGLQIFRSLFLRVLHPSNVAGRLPIAALLKESPLFLASEC","WP_087454414_3","none"
"790","KUM76187","KUM76187_1","KUM76187_1","Streptomyces","YM-216391_RiPP: YM-216391 family RiPP peptide","NF033416.1","KUM76187_1","Streptomyces curacoi","157","1","34.9","yes","MFENTTAEIEEVDIEVGFIIGSTCCSLEMEEDDLDVAAEETEAV","KUM76187_1","5.50E-28"
"791","WP_079051299","WP_079051299_1","WP_079051299_1","Streptomyces","YM-216391_RiPP: YM-216391 family RiPP peptide","NF033416.1","WP_079051299_1","Streptomyces curacoi","55","1","34.9","yes","MFENTTAEIEEVDIEVGFIIGSTCCSLEMEEDDLDVAAEETEAV","WP_079051299_1","5.50E-28"
"792","AFJ68075","AFJ68075_1","AFJ68075_1","Streptomyces","YM-216391_RiPP: YM-216391 family RiPP peptide","NF033416.1","AFJ68075_1","Streptomyces nobilis","91","1","25.6","yes","MTAEIEEVDIEVGFIVGSSSCSLELEEDDLDVAADE","AFJ68075_1","1.70E-29"
"793","SDG32337","SDG32337_1","SDG32337_1","Lechevalieria","RloB-like protein","PF13707.6","SDG32337_1","Lechevalieria fradiae","4329","1","39.59","no","MSDPCFELWLLLHFKAHNAFIEKGKSACALLAEYVPGYDKRLDFSRFDDRVEAAIKRAKELPAGNPSTDVWRLVEMLLKH","SDG32337_1","6.60E-16"
"794","WP_090009591","WP_090009591_1","WP_090009591_1","Lentzea","RloB-like protein","PF13707.6","WP_090009591_1","Lentzea violacea","3829","1","39.48","no","MGSTSTGASLTSTTSDIAEAIAAAESAGISLAVSNPCFEVWLILHFADCTAGVAGPKAAEDKLRKHMPGYAKGTLDFAVLAGKVDKAVERAKALGAGNPSSDMWRLVEVVRKH","WP_090009591_1","5.20E-20"
"795","SDL74859","SDL74859_1","SDL74859_1","Lentzea","RloB-like protein","PF13707.6","SDL74859_1","Lentzea violacea","4318","1","39.48","no","MGSTSTGASLTSTTSDIAEAIAAAESAGISLAVSNPCFEVWLILHFADCTAGVAGPKAAEDKLRKHMPGYAKGTLDFAVLAGKVDKAVERAKALGAGNPSSDMWRLVEVVRKH","SDL74859_1","5.20E-20"
"796","WP_083603298","WP_083603298_2","WP_083603298_2","Actinomyces","none","none","WP_083603298_2","Actinomyces nasicola","5449","2","2.29","yes","RGFRNLENYRLRMLLITGGLDASTHTQL","WP_083603298_2","none"
"797","OKL53160","OKL53160_2","OKL53160_2","Actinomyces","none","none","OKL53160_2","Actinomyces nasicola","5533","2","2.29","yes","RGFRNLENYRLRMLLITGGLDASTHTQL","OKL53160_2","none"
"798","WP_082248115","WP_082248115_2","WP_082248115_2","Bifidobacterium","Transposase","PF01610.17","WP_082248115_2","Bifidobacterium longum subsp. infantis","1144","2","16.55","no","MGDVLAFFDWEHSANGPTEAINGRLETLRGIALGFRNPDNYITRSLLHAGSFRHTIQTHL","WP_082248115_2","1.20E-13"
"799","WP_066217216","WP_066217216_1","WP_066217216_1","Arthrobacter","none","none","WP_066217216_1","Arthrobacter woluwensis","2972","1","10.77","yes","MQQQSLQALHDAAALLHAARGLVNMLEDLVDSGIRDTHRVGVSQAVIAEAVSLTPGRVSQVIGAAPALEGWSDRVALIRDWPREALEVQKSHFKGAMTYPPYKRRRVGLPQESEGPA","WP_066217216_1","none"
"800","WP_082724316","WP_082724316_1","WP_082724316_1","Arthrobacter","none","none","WP_082724316_1","Arthrobacter woluwensis NBRC 107840","3045","1","12.71","yes","MLEDLVDSGIRDTHRVGVSQAVIAEAVSLTPGRVSQVIGAAPALEGWSDRVALIRDWPREALEVQKSHFKGAMTYPPYKRRRVGLPQESEGPA","WP_082724316_1","none"
"801","SEB29931","SEB29931_3","SEB29931_3","Arthrobacter","none","none","SEB29931_3","Arthrobacter woluwensis","2972","3","10.77","yes","MQQQSLQALHDAAALLHAARGLVNMLEDLVDSGIRDTHRVGVSQAVIAEAVSLTPGRVSQVIGAAPALEGWSDRVALIRDWPREALEVQKSHFKGAMTYPPYKRRRVGLPQESEGPA","SEB29931_3","none"
"802","AXG59058","AXG59058_1","AXG59058_1","Streptomyces","ThiS family","PF02597.20","AXG59058_1","Streptomyces lincolnensis","6400","1","46.14","no","MSRDVQVIVPEFLIGAESFSRHGERLSVADLGQLRTVLSLCHSPTAAQLWDENGTVRRNVIVVRNGELVPRAEYGALSFDDGDQIEFLLQFAGG","AXG59058_1","3.70E-10"
"803","WP_079164984","WP_079164984_1","WP_079164984_1","Streptomyces","ThiS family","PF02597.20","WP_079164984_1","Streptomyces lincolnensis","6067","1","46.14","no","MSRDVQVIVPEFLIGAESFSRHGERLSVADLGQLRTVLSLCHSPTAAQLWDENGTVRRNVIVVRNGELVPRAEYGALSFDDGDQIEFLLQFAGG","WP_079164984_1","3.70E-10"
"804","ANS70161","ANS70161_1","ANS70161_1","Streptomyces","ThiS family","PF02597.20","ANS70161_1","Streptomyces lincolnensis","6355","1","46.14","no","MSRDVQVIVPEFLIGAESFSRHGERLSVADLGQLRTVLSLCHSPTAAQLWDENGTVRRNVIVVRNGELVPRAEYGALSFDDGDQIEFLLQFAGG","ANS70161_1","3.70E-10"
"805","WP_083597719","WP_083597719_2","WP_083597719_2","Actinomadura","none","none","WP_083597719_2","Actinomadura madurae","6750","2","9.34","no","MGHSSKPKDSCGGTRGCGGNMLLVGVPQQRDSVVKRNMRALSDIVAAVKATRSR","WP_083597719_2","none"
"806","WP_101786715","WP_101786715_1","WP_101786715_1","Nonomuraea","none","none","WP_101786715_1","Nonomuraea indica","7968","1","12.27","no","MGHSDLPRDSCGGVRRCGGNLLVANATQPSESAVRRNARAVSEFWATFRASRKMLNKKR","WP_101786715_1","none"
"807","SFO39709","SFO39709_2","SFO39709_2","Actinomadura","none","none","SFO39709_2","Actinomadura madurae","6750","2","9.34","no","MGHSSKPKDSCGGTRGCGGNMLLVGVPQQRDSVVKRNMRALSDIVAAVKATRSR","SFO39709_2","none"
"808","KUN25245","KUN25245_4","KUN25245_4","Streptomyces","none","none","KUN25245_4","Streptomyces antibioticus","3134","4","8.63","no","MSMPTYDEPVVPEPAPDRGRAHDSPAIALGNASGSASATC","KUN25245_4","none"
"809","WP_059193363","WP_059193363_4","WP_059193363_4","Streptomyces","none","none","WP_059193363_4","Streptomyces antibioticus","4556","4","8.63","no","MSMPTYDEPVVPEPAPDRGRAHDSPAIALGNASGSASATC","WP_059193363_4","none"
"810","WP_107120384","WP_107120384_4","WP_107120384_4","Streptomyces","none","none","WP_107120384_4","Streptomyces antibioticus","3260","4","8.63","no","MSMPTYDEPVVPEPAPDRGRAHDSPAIALGNASGSASATC","WP_107120384_4","none"
"811","RKT36058","RKT36058_2","RKT36058_2","Microbacterium","Stress responsive A/B Barrel Domain","PF07876.12","RKT36058_2","Microbacterium sp. AG1240","33","2","30.08","no","MQRHIVLFRVRDDVASPELFAAIDTLRALEPVAGAELWRVELSTDARKGRVIVEDATFTTDAAFSRFLALPEHRAAGEVMARISDWWVGDYTE","RKT36058_2","9.60E-11"
"812","WP_058623611","WP_058623611_1","WP_058623611_1","Microbacterium","Antibiotic biosynthesis monooxygenase","PF03992.16","WP_058623611_1","Microbacterium testaceum","3357","1","14.32","no","MFRHVVLFRVRDDAADPDVSAAIAELRAVGEDPGILSWDIAMSLDTRKGRVIVEDGTFVDRAAFDEWRGSDAHRAVGERMASISDWWVGDWERK","WP_058623611_1","8.20E-09"
"813","WP_121148667","WP_121148667_1","WP_121148667_1","Microbacterium","Stress responsive A/B Barrel Domain","PF07876.12","WP_121148667_1","Microbacterium sp. AG1240","33","1","30.08","no","MQRHIVLFRVRDDVASPELFAAIDTLRALEPVAGAELWRVELSTDARKGRVIVEDATFTTDAAFSRFLALPEHRAAGEVMARISDWWVGDYTE","WP_121148667_1","9.60E-11"
"814","WP_051816122","WP_051816122_1","WP_051816122_1","Streptomyces","none","none","WP_051816122_1","Streptomyces lavenduligriseus","4925","1","46.8","yes","MSDNTAAVLSAIDSDKALRSAVIRHLATTHANEFVSPLRAEFRGNDDIALASVNSNKEWQE","WP_051816122_1","none"
"815","WP_111506795","WP_111506795_3","WP_111506795_3","Streptacidiphilus","HEAT repeats","PF13646.6","WP_111506795_3","Streptacidiphilus pinicola","4920","3","42.26","yes","MAEINEILAAIDSSKKVRSAVIERLVSTHAQEVVNPLRAIAGDDVSWSSITSNKDWSE","WP_111506795_3","5.80E-07"
"816","WP_125499925","WP_125499925_1","WP_125499925_1","Streptomyces","none","none","WP_125499925_1","Streptomyces sp. WAC00469","4874","1","48.74","yes","MSDNTAAVLSAIDSDKALRSAVIRHLATTHAHEFVGPLRAEFRGNDDIALASVNSNKEWQE","WP_125499925_1","none"
"817","WP_083318853","WP_083318853_2","WP_083318853_2","Brevibacterium","RiPP_thiocil: thiocillin family RiPP","NF033482.1","WP_083318853_2","Brevibacterium sp. HMSC07C04","5362","2","20.03","yes","MNTEMKINNDLTTIDLAAIDQDFNFEPLQDVASPSNTAACFGTAASFGGSAGTVGCFGTF","WP_083318853_2","6.40E-12"
"818","WP_083304061","WP_083304061_2","WP_083304061_2","Brevibacterium","RiPP_thiocil: thiocillin family RiPP","NF033482.1","WP_083304061_2","Brevibacterium sp. HMSC063G07","5083","2","20.03","yes","MNTEMKINNDLTTIDLAAIDQDFNFEPLQDVASPSNTAACFGTAASFGGSAGTVGCFGTF","WP_083304061_2","6.40E-12"
"819","OFL66352","OFL66352_2","OFL66352_2","Brevibacterium","RiPP_thiocil: thiocillin family RiPP","NF033482.1","OFL66352_2","Brevibacterium sp. HMSC063G07","5194","2","20.03","yes","MNTEMKINNDLTTIDLAAIDQDFNFEPLQDVASPSNTAACFGTAASFGGSAGTVGCFGTF","OFL66352_2","6.40E-12"
"820","WP_057232473","WP_057232473_1","WP_057232473_1","Kitasatospora","none","none","WP_057232473_1","Kitasatospora sp. Root187","2430","1","22.47","no","MTREEKLPAGSVDDTVAEPEESRQATEERDEQAYFEQLAAVKDSILEGVITPW","WP_057232473_1","none"
"821","WP_128378882","WP_128378882_1","WP_128378882_1","Streptomyces","none","none","WP_128378882_1","Streptomyces sp. SYSU K10008","2791","1","14.95","no","MTSAGSGEESFEPGPRKLDVEGDDVGGDIAPATDLDDAQTYFEELAMVKDSILEGVITYW","WP_128378882_1","none"
"822","WP_030269598","WP_030269598_1","WP_030269598_1","Streptomyces","none","none","WP_030269598_1","Streptomyces sp. NRRL B-24484","1852","1","17.22","no","MTSDEQGAGPVEVAGESVGIDEAAAQECFEQLAAVKDSILEGVITPW","WP_030269598_1","none"
"823","KUN25245","KUN25245_2","KUN25245_2","Streptomyces","none","none","KUN25245_2","Streptomyces antibioticus","6518","2","25.92","yes","MIPRADGLRAGPFTVSAVGAEGVDLRSVDASGFTANLLGQRPDQGGPSTVNELSIAVLAIVGDTAKLRLFPQE","KUN25245_2","none"
"824","WP_107120384","WP_107120384_2","WP_107120384_2","Streptomyces","none","none","WP_107120384_2","Streptomyces antibioticus","6644","2","25.92","yes","MIPRADGLRAGPFTVSAVGAEGVDLRSVDASGFTANLLGQRPDQGGPSTVNELSIAVLAIVGDTAKLRLFPQE","WP_107120384_2","none"
"825","WP_059193363","WP_059193363_2","WP_059193363_2","Streptomyces","none","none","WP_059193363_2","Streptomyces antibioticus","7940","2","25.92","yes","MIPRADGLRAGPFTVSAVGAEGVDLRSVDASGFTANLLGQRPDQGGPSTVNELSIAVLAIVGDTAKLRLFPQE","WP_059193363_2","none"
"826","RPK69291","RPK69291_1","RPK69291_1","Streptomyces","Divergent 4Fe-4S mono-cluster","PF06902.11","RPK69291_1","Streptomyces sp. ADI96-02","2277","1","15.33","yes","MPREGEPRTARAAGPEAAARVFVDPALCIGSGICLATAPRHFEPGGDNRSRARPDAPASDESAEDAAALCPVEAIGLVAGPPAPGPPPGP","RPK69291_1","4.90E-08"
"827","WP_124271723","WP_124271723_1","WP_124271723_1","Streptomyces","Divergent 4Fe-4S mono-cluster","PF06902.11","WP_124271723_1","Streptomyces sp. ADI96-02","2277","1","15.33","yes","MPREGEPRTARAAGPEAAARVFVDPALCIGSGICLATAPRHFEPGGDNRSRARPDAPASDESAEDAAALCPVEAIGLVAGPPAPGPPPGP","WP_124271723_1","4.90E-08"
"828","WP_116209352","WP_116209352_1","WP_116209352_1","Streptomyces","Divergent 4Fe-4S mono-cluster","PF06902.11","WP_116209352_1","Streptomyces olivoreticuli subsp. olivoreticuli","2158","1","26.27","yes","MPSGDDPATASDGTLRAHIDPELCVGSGICLATAPRHFEPTMDARSRARPDAPPADDRAQDAAALCPMEAIHFVRAREPTPRTAPPEARS","WP_116209352_1","2.10E-07"
"829","OIJ88146","OIJ88146_4","OIJ88146_4","Streptomyces","none","none","OIJ88146_4","Streptomyces sp. MUSC 14","1846","4","18.68","yes","MTSPKPPLRTRITEAVITILLAGLAVLAFGVALVHMLRTH","OIJ88146_4","none"
"830","WP_023554016","WP_023554016_1","WP_023554016_1","Streptomyces","none","none","WP_023554016_1","Streptomyces roseochromogenus subsp. oscitans DS 12.976","3581","1","24.77","yes","MTSPKPPLRTRITEAVITIALVSLVVLAFGIALVHTLQSH","WP_023554016_1","none"
"831","WP_079177123","WP_079177123_4","WP_079177123_4","Streptomyces","none","none","WP_079177123_4","Streptomyces sp. MUSC 14","1867","4","18.68","yes","MTSPKPPLRTRITEAVITILLAGLAVLAFGVALVHMLRTH","WP_079177123_4","none"
"832","AGC62644","AGC62644_1","AGC62644_1","Mycobacterium","Divergent 4Fe-4S mono-cluster","PF06902.11","AGC62644_1","Mycobacterium liflandii 128FXT","2710","1","25.83","yes","MRLVVDLNKCQGYAQCVPLAPEVFKLVGEEALAYDPNPDDSQRQRVLRAAASCPVQAIILEVDPPADRDTK","AGC62644_1","1.00E-08"
"833","CDM77002","CDM77002_2","CDM77002_2","Mycobacterium","Divergent 4Fe-4S mono-cluster","PF06902.11","CDM77002_2","Mycobacterium marinum E11","2709","2","22.71","yes","MRLVVDLNKCQGYAQCVPLAPEVFKLVGEEALAYDPNPDDSQRQRVLRAAASCPVQAIILEVDPPADRDTK","CDM77002_2","1.00E-08"
"834","WP_020787304","WP_020787304_1","WP_020787304_1","Mycobacterium","Divergent 4Fe-4S mono-cluster","PF06902.11","WP_020787304_1","Mycobacterium ulcerans","2666","1","25.83","yes","MRLVVDLNKCQGYAQCVPLAPEVFKLVGEEALAYDPNPDDSQRQRVLRAAASCPVQAIILEVDPPADRDTK","WP_020787304_1","1.00E-08"
"835","WP_030877129","WP_030877129_2","WP_030877129_2","Streptomyces","none","none","WP_030877129_2","Streptomyces varsoviensis","5739","2","39.65","no","MINHTMIVSFDGEIPDSELDQYLRDIEQVMRDSGAIQTFAAKRHIRVPADDHSPVFVASAVVRLGLADVAALNASFAAPGAGELIKRWQAKYPYRVVWVNHEELV","WP_030877129_2","none"
"836","WP_082871442","WP_082871442_1","WP_082871442_1","Nocardia","none","none","WP_082871442_1","Nocardia terpenica","6669","1","55.31","yes","MINHTMIVSFDRPLPDSELDRYLADIEKVMRDTGFVQSVATGRHLPVPGEDAIAALIATAIVQVTVADIDTLAQAFTAPGMHEVIDHWQSRHPYQVAWANHEPLA","WP_082871442_1","none"
"837","KZM72684","KZM72684_1","KZM72684_1","Nocardia","none","none","KZM72684_1","Nocardia terpenica","6669","1","55.31","yes","MINHTMIVSFDRPLPDSELDRYLADIEKVMRDTGFVQSVATGRHLPVPGEDAIAALIATAIVQVTVADIDTLAQAFTAPGMHEVIDHWQSRHPYQVAWANHEPLA","KZM72684_1","none"
"838","WP_067972339","WP_067972339_5","WP_067972339_5","Nocardiopsis","none","none","WP_067972339_5","Nocardiopsis trehalosi NBRC 14201","510","5","36.32","yes","MCQHDPACPPYDHLDREAARLVASHPEQGWSLLCNGVVVFEDTGELLPDGGVIAPHRPTDIRTAA","WP_067972339_5","none"
"839","KPC62607","KPC62607_3","KPC62607_3","Streptomyces","none","none","KPC62607_3","Streptomyces chattanoogensis","2524","3","19.14","yes","MCQHHPPCPSAEASDREAAQVLSSHPEQGWTLLCNGVLLFEDTGELLPNGQIIAPRRAAAVPA","KPC62607_3","none"
"840","WP_078971081","WP_078971081_3","WP_078971081_3","Streptomyces","none","none","WP_078971081_3","Streptomyces chattanoogensis","2545","3","19.14","yes","MCQHHPPCPSAEASDREAAQVLSSHPEQGWTLLCNGVLLFEDTGELLPNGQIIAPRRAAAVPA","WP_078971081_3","none"
"841","SER15522","SER15522_1","SER15522_1","Lechevalieria","none","none","SER15522_1","Lechevalieria xinjiangensis","1514","1","42.9","no","MSSWPPEQQWSQPARPGSRGGPLLGVLALCLGVAGVVVTFLPVDLTGTRAYLAWVFGLPGLVVAVFGLLGDRAGKAMAAIGAVLSLLAVAIGVITIGNVVGVL","SER15522_1","none"
"842","SMC91639","SMC91639_1","SMC91639_1","Lentzea","none","none","SMC91639_1","Lentzea albidocapillata","1503","1","48.45","no","MSDGPKGPGLGVAALVLGLLGVVVTFLPMNLDGVRPYSAWAFGLPGFVVAILGLLGNRRGKAFAVAGALLSLLAVLIGVIAMGNVVAKS","SMC91639_1","none"
"843","WP_089952439","WP_089952439_1","WP_089952439_1","Lechevalieria","none","none","WP_089952439_1","Lechevalieria xinjiangensis","1514","1","42.9","no","MSSWPPEQQWSQPARPGSRGGPLLGVLALCLGVAGVVVTFLPVDLTGTRAYLAWVFGLPGLVVAVFGLLGDRAGKAMAAIGAVLSLLAVAIGVITIGNVVGVL","WP_089952439_1","none"
"844","AKJ13608","AKJ13608_5","AKJ13608_5","Streptomyces","none","none","AKJ13608_5","Streptomyces incarnatus","6253","5","18.23","no","MRAPWKGDPAERARQRAAQAEKQRAQARRQEEQRLAQERREQQRAAEEQEREARRGERDGR","AKJ13608_5","none"
"845","WP_055553439","WP_055553439_1","WP_055553439_1","Streptomyces","none","none","WP_055553439_1","Streptomyces kanamyceticus","3620","1","16.65","no","MRAPWKGDPVERARNRARQRELQRQQDAEQARNRERQEREQAERDARQARDEQNDRR","WP_055553439_1","none"
"846","WP_037862255","WP_037862255_2","WP_037862255_2","Streptomyces","none","none","WP_037862255_2","Streptomyces sp. NRRL S-340","5818","2","17.49","no","MRWPWQGDPEERARRDVEQRERDELRRQAEELRDERRAAEEAERDRAQRERQQAREQARAQAQQERRQNRRWRR","WP_037862255_2","none"
"847","WP_006143940","WP_006143940_1","WP_006143940_1","Streptomyces","'Cold-shock' DNA-binding domain","PF00313.22","WP_006143940_1","Streptomyces griseoaurantiacus M045","5731","1","53.29","yes","MATGTVKWFNSEKGFGFIEQDGGGPDVFAHYSNIAAQGFRELLEGQKVSFDIAQGQKGPTAENIVPA","WP_006143940_1","4.70E-33"
"848","WP_100806338","WP_100806338_2","WP_100806338_2","Streptomyces","'Cold-shock' DNA-binding domain","PF00313.22","WP_100806338_2","Streptomyces sp. M56","6690","2","45.92","yes","MASGTVKWFNAAKGFGFIEQDGGGPDVFAHFSNIAAQGFRELLEGQKVTFDIAPGQKGPTAENIVPA","WP_100806338_2","1.00E-31"
"849","WP_126890470","WP_126890470_1","WP_126890470_1","Curtobacterium","'Cold-shock' DNA-binding domain","PF00313.22","WP_126890470_1","Curtobacterium sp. HSID17257","6968","1","55.55","no","MATGTVKWFNNEKGFGFIAPDDGSADVFAHFSAIAGNGYKSLEENQKVEFEITEGRKGPQAENISVIG","WP_126890470_1","1.00E-35"
"850","WP_104181080","WP_104181080_1","WP_104181080_1","Arthrobacter","Transglycosylase associated protein","PF04226.13","WP_104181080_1","Arthrobacter sp. B0490","7859","1","69.76","yes","MSFIAFLILGLIAGALAKLILPGKQGGGIIITMLLGVVGAFLGGFIGGSLLGINMGSTFSWQSILFAVLGALIVLAIYGAVTKRRGSRV","WP_104181080_1","2.20E-15"
"851","WP_098514311","WP_098514311_1","WP_098514311_1","Amycolatopsis","Transglycosylase associated protein","PF04226.13","WP_098514311_1","Amycolatopsis sulphurea","5256","1","67.17","no","MGIIGWIVLGLVAGVIAKILMPGKDPGGCIITILLGIGGALLGGWIGKTVFHRNVGTFFDLKTWGLAIAGSLVILIIYRLLFGRSRDRRD","WP_098514311_1","8.30E-11"
"852","WP_105032337","WP_105032337_1","WP_105032337_1","Arthrobacter","Transglycosylase associated protein","PF04226.13","WP_105032337_1","Arthrobacter ruber","7897","1","69.9","yes","MSFIGFLILGLIAGALAKLILPGKQGGGILMTMLLGVVGAFLGGFIGGSILGVDLGSTFSLMSILFAVIGALIVLLVYGAITKRRGSRV","WP_105032337_1","0.019"
"853","PJJ39560","PJJ39560_4","PJJ39560_4","Streptomyces","none","none","PJJ39560_4","Streptomyces sp. CNZ306","4228","4","8.66","yes","MRSGYGPISIPPNARLIRATASAREMPMRRTMTPAMSRKNPSIPSSRSVVNSSVMVLSPVDSRAVRGGRAPPPGATGVLHGLVRG","PJJ39560_4","none"
"854","WP_100302786","WP_100302786_4","WP_100302786_4","Streptomyces","none","none","WP_100302786_4","Streptomyces sp. CNZ306","4189","4","8.66","yes","MRSGYGPISIPPNARLIRATASAREMPMRRTMTPAMSRKNPSIPSSRSVVNSSVMVLSPVDSRAVRGGRAPPPGATGVLHGLVRG","WP_100302786_4","none"
"855","WP_078564093","WP_078564093_4","WP_078564093_4","Streptomyces","none","none","WP_078564093_4","Streptomyces sp. CNQ329","7898","4","9.64","yes","MSAPPYALLIRATASAREMPMRSTMTSAMSRKYFSIPSSSSVVNSSVMILSAVRAG","WP_078564093_4","none"
"856","WP_057608322","WP_057608322_3","WP_057608322_3","Streptomyces","Zinc-ribbon like family","PF17034.5","WP_057608322_3","Streptomyces sp. Root369","4542","3","6.76","yes","MGPHRIGLQLLYVYDELIRDDARQRARRTVAHSSRRTATPACLDSLQRCAMCFLSPEGGGTDGIVADHRTLAKG","WP_057608322_3","3.60E-07"
"857","WP_123074529","WP_123074529_4","WP_123074529_4","Streptomyces","none","none","WP_123074529_4","Streptomyces sp. ADI91-18","1602","4","29.63","yes","MSRPASKDPRPLRSAATRRAMAHRQLPRWLREGAVAVEDGGRRGVVQFIGEWEDPATRRINPCAIFLRPEGGGVEWIVADHVTLTQG","WP_123074529_4","none"
"858","WP_094009173","WP_094009173_4","WP_094009173_4","Amycolatopsis","none","none","WP_094009173_4","Amycolatopsis sp. KNN50.9b","1557","4","18.44","yes","MQFIGEWEDPSTRRVTDCAVFLRPEGGGMEWIVADHRTLTQD","WP_094009173_4","none"
"859","WP_101557151","WP_101557151_1","WP_101557151_1","Brevibacterium","Transposase IS116/IS110/IS902 family","PF02371.16","WP_101557151_1","Brevibacterium aurantiacum","1600","1","14.47","yes","MPGVGVKTASQILLAAGDFSEFKTVGHLAAYAGIAPVTRRSANQCLARRRLNVLFAMVKTGAFYEAKTPAAA","WP_101557151_1","1.60E-16"
"860","WP_101557149","WP_101557149_1","WP_101557149_1","Brevibacterium","Transposase IS116/IS110/IS902 family","PF02371.16","WP_101557149_1","Brevibacterium aurantiacum","3705","1","14.47","yes","MPGVGVKTASQILLAAGDFSEFKTVGHLAAYAGIAPVTRRSANQCLARRRLNVLFAMVKTGAFYEAKTPAAA","WP_101557149_1","1.60E-16"
"861","WP_116200011","WP_116200011_2","WP_116200011_2","Amycolatopsis","none","none","WP_116200011_2","Amycolatopsis circi","7567","2","3.54","no","ICLARRRCDVLYAMLRNHTHYRHPEPASAPAAA","WP_116200011_2","none"
"862","WP_061409829","WP_061409829_2","WP_061409829_2","Corynebacterium","none","none","WP_061409829_2","Corynebacterium pseudotuberculosis","2208","2","0.62","yes","MTYLFDNFYKNKTHFAVSFCQWIFDSASDYPRAATPLVGTLIPAGGRLKL","WP_061409829_2","none"
"863","WP_075142776","WP_075142776_2","WP_075142776_2","Corynebacterium","none","none","WP_075142776_2","Corynebacterium pseudotuberculosis","1810","2","0.61","yes","MTYLFDNFYKNKTHFAVSFCQWIFDSASDYPRAATPLVGTLIPAGGRLKL","WP_075142776_2","none"
"864","AFK17249","AFK17249_2","AFK17249_2","Corynebacterium","none","none","AFK17249_2","Corynebacterium pseudotuberculosis 258","2077","2","0.62","yes","MTYLFDNFYKNKTHFAVSFCQWIFDSASDYPRAATPLVGTLIPAGGRLKL","AFK17249_2","none"
"865","WP_078561279","WP_078561279_4","WP_078561279_4","Amycolatopsis","none","none","WP_078561279_4","Amycolatopsis sp. AA4","1202","4","29.7","yes","MPVAIDKTGMLDAVERLDSGMDSSNAIAEPSELTVSVADQLTREQFSALFSDSPANVAGGDNATRD","WP_078561279_4","none"
"866","WP_014690715","WP_014690715_1","WP_014690715_1","Actinoplanes","none","none","WP_014690715_1","Actinoplanes sp. SE50","225","1","0.75","yes","MPRERFSGIAVRGPAAIAGN","WP_014690715_1","none"
"867","EFL12569","EFL12569_3","EFL12569_3","Streptomyces","none","none","EFL12569_3","Streptomyces sp. AA4","1375","3","29.7","yes","MPVAIDKTGMLDAVERLDSGMDSSNAIAEPSELTVSVADQLTREQFSALFSDSPANVAGGDNATRD","EFL12569_3","none"
"868","WP_071042996","WP_071042996_1","WP_071042996_1","Microbacteriaceae","Phospholipase_D-nuclease N-terminal","PF13396.6","WP_071042996_1","Microbacteriaceae bacterium","7985","1","45.85","yes","MGTATKNLSPVSKLGLGVVGVVQVAFAFLAFWDLAHRDHRDVVGSKPMWVPVILVNWIGPAAYFLVGIRR","WP_071042996_1","6.80E-11"
"869","WP_104167780","WP_104167780_1","WP_104167780_1","Arthrobacter","Phospholipase_D-nuclease N-terminal","PF13396.6","WP_104167780_1","Arthrobacter sp. SX1312","6731","1","44.47","yes","MADRNASTRHSKKAAKKRWSDLTDGQKARVLVLGAVQLSLAAFAWTDLATRPKDTVNGSKGMWAAIIVINFVGPVAYFWKGIRR","WP_104167780_1","2.20E-09"
"870","WP_071042994","WP_071042994_1","WP_071042994_1","Microbacteriaceae","Phospholipase_D-nuclease N-terminal","PF13396.6","WP_071042994_1","Microbacteriaceae bacterium","6129","1","45.85","yes","MGTATKNLSPVSKLGLGVVGVVQVAFAFLAFWDLAHRDHRDVVGSKPMWVPVILVNWIGPAAYFLVGIRR","WP_071042994_1","6.80E-11"
"871","WP_113979657","WP_113979657_5","WP_113979657_5","Sphaerisporangium","MbtH-like protein","PF03621.13","WP_113979657_5","Sphaerisporangium sp. LHW63015","6799","5","14.35","no","MSSLFGEAGESCLVVVNEEGQHSLWPQVTAPPVGWRPVYGPAGRARCLAYVEEHWTDMRPLGLVARLAGEAAATERRAG","WP_113979657_5","2.80E-23"
"872","ANN17130","ANN17130_2","ANN17130_2","Amycolatopsis","MbtH-like protein","PF03621.13","ANN17130_2","Amycolatopsis orientalis","6406","2","19.04","yes","MPNPFEDPDAKYLVLVNDEGQHSLWPVFADVPAGWKSVFGESGRQECLDYIEKNWTDMRPKSLIEAMEKTAPAS","ANN17130_2","4.10E-33"
"873","WP_103341360","WP_103341360_2","WP_103341360_2","Amycolatopsis","MbtH-like protein","PF03621.13","WP_103341360_2","Amycolatopsis sp. CA-126428","5328","2","44.65","yes","MNPFDDPDGEFVALVNDEGQYSLWPTFSPVPAGWTTDFGPDRRDACLAHIERTWTDMRPRSLVLAMEQQQEQG","WP_103341360_2","3.90E-31"
"874","WP_111209344","WP_111209344_1","WP_111209344_1","Curtobacterium","none","none","WP_111209344_1","Curtobacterium sp. MCSS17_015","3109","1","33.4","no","MPREVTLLCRAEVQVRDVAEALLLHDDAWGVRALDDGPMVQVCRDATHPVITVLGVRRVDGLDEVTRLLPDAPAMSVPLWWVDAVTPNNADGEAGVSAALEASLDLDAVCIVHGD","WP_111209344_1","none"
"875","WP_110911190","WP_110911190_2","WP_110911190_2","Curtobacterium","none","none","WP_110911190_2","Curtobacterium sp. MCPF17_050","3579","2","44.53","no","MAEALLLHDDSWGVRALDDGPMTQVCRDATHPVITVLGVRRVDSLDEVTRLLPDAPAMSVPLWWVDTVTPLGADGEAGVTAALEASLDLDAVCIVHGD","WP_110911190_2","none"
"876","SBN62121","SBN62121_2","SBN62121_2","Curtobacterium","none","none","SBN62121_2","Curtobacterium sp. 9128","2569","2","35.44","yes","MASVPRDVTLLCREQVEIREVAEALLLHDDTWGVRALDDGPMMQVCRDQEHPVITVLGVRRVDSFDEVERILPDAPTLGTPLWWVDTVTPAGSDGESGIAAALEAALDLDAVCIVHGD","SBN62121_2","none"
"877","WP_070739770","WP_070739770_2","WP_070739770_2","Rothia","none","none","WP_070739770_2","Rothia sp. HMSC065D02","7342","2","34.97","no","MKKAIYIVGATTAVVFFCGIVLFILGEWGALVEYHASEWRGIQFEGASPLTRATLNISFRLLGIGFLTGIITLILLFTTATRNARKAQNKHAEQNKTPLAEGQNQIDL","WP_070739770_2","none"
"878","WP_070739770","WP_070739770_4","WP_070739770_4","Rothia","Domain of unknown function (DUF4212)","PF13937.6","WP_070739770_4","Rothia sp. HMSC065D02","7691","4","15.18","no","MKKTVQIMGIVAAIFLIIGFGLFILAGWGSLVEYHALEWRGVQHKGASPLTRATGNLSYWFLGTGFLTGFIALIPFFTTAIRNSRKTHKKYPKQAQDLLKDGQNQINS","WP_070739770_4","7.50E-07"
"879","WP_070739770","WP_070739770_3","WP_070739770_3","Rothia","none","none","WP_070739770_3","Rothia sp. HMSC065D02","7029","3","32.95","no","MKKAIYTVGAVAAVLLVIGFGLLILAGWGSLVEYHAFEWRGIDPAGASPLVMATNNLSLWFLGIGFLTGIITLILLFTTATRNTRKKRSAHLGQTS","WP_070739770_3","none"
"880","WP_082057091","WP_082057091_2","WP_082057091_2","Psychromicrobium","Helix-turn-helix domain","PF12840.7","WP_082057091_2","Psychromicrobium lacuslunae","4609","2","12.54","yes","MADPSRSRILMELLDGPSYPAVLSRKLELTRSNVSNHLSCLRDCGIVVAEPEGRQTRYEISDPHLTKALTALVEITLAVDENADCIDPSCPIPGCCEPSVR","WP_082057091_2","8.60E-11"
"881","WP_131626375","WP_131626375_2","WP_131626375_2","Frankia","Bacterial regulatory protein, arsR family","PF01022.20","WP_131626375_2","Frankia sp. BMG5.11","5474","2","2.49","no","MGISRSRLSNHLACLRGCGLVVAVPVGRRTRYELADARLGRALDELRAAVTVLAQDPGCPDVAEKGCC","WP_131626375_2","4.90E-09"
"882","AJT41785","AJT41785_2","AJT41785_2","Psychromicrobium","Helix-turn-helix domain","PF12840.7","AJT41785_2","Psychromicrobium lacuslunae","4645","2","12.54","yes","MADPSRSRILMELLDGPSYPAVLSRKLELTRSNVSNHLSCLRDCGIVVAEPEGRQTRYEISDPHLTKALTALVEITLAVDENADCIDPSCPIPGCCEPSVR","AJT41785_2","8.60E-11"
"883","WP_054567598","WP_054567598_3","WP_054567598_3","Frankia","none","none","WP_054567598_3","Frankia sp. R43","6078","3","6.62","no","MERAVGPAGGVQRLFPCGDRLPDRLISGLKIPGLADRSSHREAADGGGDRGGRFPELDRMTLVGTATEPGCRSGPHAEHLAPVVTRLLAGVGSRREDVVHQADP","WP_054567598_3","none"
"884","WP_091272827","WP_091272827_2","WP_091272827_2","Frankia","none","none","WP_091272827_2","Frankia irregularis","3954","2","14.57","no","MESAVGSAGGAQRLFPRGDRLPDRLISGPKIQGLADRSSNREARARFLRSTPSPGHPYAVRKIAATSMFRRMTLVGTAMELGCLGRPHAEHLAPVVTRFLAASGRQVDAGPPEQP","WP_091272827_2","none"
"885","WP_091272829","WP_091272829_2","WP_091272829_2","Frankia","none","none","WP_091272829_2","Frankia irregularis","5366","2","14.57","no","MESAVGSAGGAQRLFPRGDRLPDRLISGPKIQGLADRSSNREARARFLRSTPSPGHPYAVRKIAATSMFRRMTLVGTAMELGCLGRPHAEHLAPVVTRFLAASGRQVDAGPPEQP","WP_091272829_2","none"
"886","WP_076824657","WP_076824657_3","WP_076824657_3","Frankia","none","none","WP_076824657_3","Frankia sp. CcI49","6070","3","2.47","no","MERAVGPAGGVQRLFPCGVRLPDRLISGLKIPGLADRSSHREAADGGGDRGGRFPELDRMTLVGTATEPGCRSGPHAEHLAPVVTRLLAGVGSRREDVVHQADP","WP_076824657_3","none"
"887","SIR58548","SIR58548_3","SIR58548_3","Microbispora","Bunyavirus non-structural protein NS-s","PF01104.17","SIR58548_3","Microbispora rosea","6289","3","21.87","yes","MKPCSIMVPMNSSTSATMRLLIAELLPANSRDSLNMTGSRSPSLATSFHIREPVSFRLWKSPVSVW","SIR58548_3","2.80E-07"
"888","WP_113985589","WP_113985589_4","WP_113985589_4","Sphaerisporangium","none","none","WP_113985589_4","Sphaerisporangium sp. LHW63015","4606","4","14.66","yes","MMCTVTRALSPANSSASRVMIFSRSPSLATSSQILEPVSFRLWKSPVSVWYSEMPSPVSCQMMLSLIRSDTLHLSF","WP_113985589_4","none"
"889","WP_111167565","WP_111167565_5","WP_111167565_5","Sphaerisporangium","none","none","WP_111167565_5","Sphaerisporangium sp. 7K107","4607","5","18.45","yes","MIRTVTRALSPANSSASRVMIFSRSPSLATSSQILEPDSFRLWKSPVSVWYSEMPSPVSCQMTLSLIRSDTLHLSF","WP_111167565_5","none"
"890","WP_049570352","WP_049570352_6","WP_049570352_6","Nonomuraea","none","none","WP_049570352_6","Nonomuraea sp. SBT364","5872","6","17.68","yes","MLPRNSCTSFRMRTLTATLPPENAWDSSETIASRSPSLATSVQIREAVSFKLWKSPDSVWYSEMPPAVSCHITASLIWSDTLHLL","WP_049570352_6","none"
"891","WP_075012634","WP_075012634_3","WP_075012634_3","Geodermatophilus","none","none","WP_075012634_3","Geodermatophilus obscurus","3872","3","8.84","yes","MPIAAQTAFRSGSQCGPSPEGMHVAANSWPSTVPVTLTARRVPNSSAEPGTVTKVAKAPSFSMGAVNEASMS","WP_075012634_3","none"
"892","WP_093583210","WP_093583210_4","WP_093583210_4","Geodermatophilus","none","none","WP_093583210_4","Geodermatophilus amargosae","3918","4","17.97","yes","MTSCPARSLPIAEQTAFRRGSQCGPSPDGMQVAAKSWPSTVPVTFTARRVPNSSAEPGTVTKVAKAPSFSMGAVNEASMS","WP_093583210_4","none"
"893","SFO01480","SFO01480_4","SFO01480_4","Geodermatophilus","none","none","SFO01480_4","Geodermatophilus obscurus","3872","4","8.84","yes","MPIAAQTAFRSGSQCGPSPEGMHVAANSWPSTVPVTLTARRVPNSSAEPGTVTKVAKAPSFSMGAVNEASMS","SFO01480_4","none"
"894","WP_089404560","WP_089404560_4","WP_089404560_4","Geodermatophilus","none","none","WP_089404560_4","Geodermatophilus saharensis","2892","4","17.87","yes","MTSCPAASLPIAAHTALRRGSQCGPCPDGMQVAEKECPSTVPVTFTALRVPNSSAEPGTVTKVGNAPSFSRGAVNVVSRESMLPPTAGTAGTHR","WP_089404560_4","none"
"895","WP_061300623","WP_061300623_4","WP_061300623_4","Herbidospora","Helix-turn-helix domain","PF12840.7","WP_061300623_4","Herbidospora cretacea","4562","4","31.68","no","MHAFDVLGDPVRRRILELLADGEQSAGEVGAIVQEEFGITQPAVSQHLRVLRENGFATVRAEGTRRLYAVDPAPLAEIDSWLTRCRDQSS","WP_061300623_4","7.90E-17"
"896","WP_062349267","WP_062349267_3","WP_062349267_3","Herbidospora","Helix-turn-helix domain","PF12840.7","WP_062349267_3","Herbidospora yilanensis","4489","3","39.9","no","MHAFDVLGDPVRRRILELLADGERPAGEVGAVVQAEFGITQPAVSQHLRVLRENGFATVRVDGARRLYAVDPAPLAEIDRWLTRYRKGQPL","WP_062349267_3","9.00E-16"
"897","WP_066366076","WP_066366076_4","WP_066366076_4","Herbidospora","Helix-turn-helix domain","PF12840.7","WP_066366076_4","Herbidospora mongoliensis","4586","4","43.0","no","MHAFDVLGDPVRRRILELLADGERPAGEVGAIVQEEFGITQPAVSQHLRVLRENGFATVRAEGARRLYAVDPAPLAEIDRWLTRYRDQSS","WP_066366076_4","2.80E-16"
"898","WP_062440803","WP_062440803_4","WP_062440803_4","Herbidospora","Helix-turn-helix domain","PF12840.7","WP_062440803_4","Herbidospora daliensis","4487","4","32.98","no","MHAFDVLGDPVRRRILELLADGELSAGEVGAVVQPEFGISQPAVSQHLRVLRENGFTTVRVDGPRRLYAVDPAPLAEIDRWLTRYGKGQPL","WP_062440803_4","1.00E-16"
"899","WP_088986452","WP_088986452_1","WP_088986452_1","Micromonospora","none","none","WP_088986452_1","Micromonospora chokoriensis","79","1","26.76","yes","MAAEDSTTDLDLDVEDYEEYGTFGEVPMCGVTQSSNVQCNYPMCA","WP_088986452_1","none"
"900","SCE72235","SCE72235_1","SCE72235_1","Micromonospora","none","none","SCE72235_1","Micromonospora chokoriensis","164","1","21.76","no","MAAEDSTTDLDLDVEDYEEYGTFGEVPMCGVTQSSNVQCNYPMCA","SCE72235_1","none"
"901","SCE72260","SCE72260_1","SCE72260_1","Micromonospora","none","none","SCE72260_1","Micromonospora chokoriensis","82","1","26.76","yes","MAAEDSTTDLDLDVEDYEEYGTFGEVPMCGVTQSSNVQCNYPMCA","SCE72260_1","none"
"902","WP_088991224","WP_088991224_1","WP_088991224_1","Micromonospora","none","none","WP_088991224_1","Micromonospora chokoriensis","263","1","21.76","no","MAAEDSTTDLDLDVEDYEEYGTFGEVPMCGVTQSSNVQCNYPMCA","WP_088991224_1","none"
"903","WP_017568552","WP_017568552_2","WP_017568552_2","Nocardiopsis","none","none","WP_017568552_2","Nocardiopsis synnemataformans DSM 44143","7454","2","23.58","yes","MRITPLARLGDRIVERLAPKATAQAMPVGCGWQTRCNSFAFQCASHVWFGTDRRRVCDGTGGTTYGPWQHWTCNC","WP_017568552_2","none"
"904","WP_121185217","WP_121185217_1","WP_121185217_1","Nocardiopsis","none","none","WP_121185217_1","Nocardiopsis sp. Huas11","4955","1","39.12","yes","MRISPIARLGDRIVDRLAPKATAQAMPVGCGWQSRCNGFVGQCATTVWFGMERRRVCDGTGGTTYGPWQHWYCGC","WP_121185217_1","none"
"905","WP_017568553","WP_017568553_2","WP_017568553_2","Nocardiopsis","none","none","WP_017568553_2","Nocardiopsis synnemataformans DSM 44143","6108","2","23.58","yes","MRITPLARLGDRIVERLAPKATAQAMPVGCGWQTRCNSFAFQCASHVWFGTDRRRVCDGTGGTTYGPWQHWTCNC","WP_017568553_2","none"
"906","WP_121185218","WP_121185218_2","WP_121185218_2","Nocardiopsis","none","none","WP_121185218_2","Nocardiopsis sp. Huas11","6300","2","39.12","yes","MRISPIARLGDRIVDRLAPKATAQAMPVGCGWQSRCNGFVGQCATTVWFGMERRRVCDGTGGTTYGPWQHWYCGC","WP_121185218_2","none"
"907","WP_089156471","WP_089156471_1","WP_089156471_1","Micromonospora","none","none","WP_089156471_1","Micromonospora sp. NBS 11-29","3718","1","40.63","yes","MSYDLAVWEGAQPSNDGEGGAVYSQLYEKYMAGEEVVPTLGILAYAESLAERWAVLTDGQTSGWGSLLDDASGPMIYLTMPYGLAGELSAEAARLAAEHGLVCYDPQTEHLRPAHND","WP_089156471_1","none"
"908","WP_015663091","WP_015663091_5","WP_015663091_5","Streptomyces","none","none","WP_015663091_5","Streptomyces davaonensis JCM 4913","3714","5","14.94","no","MSYDLAVWDGERPANDRTAGRVFTDLFDRYMETEVCDPPTERITAYVAALVERWGDVAEDVEDASPWAAGPLIGGAGGPLVYFAMSWSRAEEVSAWAAALAESMGLVCFDPQQNRLRP","WP_015663091_5","none"
"909","WP_084902797","WP_084902797_1","WP_084902797_1","Streptomyces","none","none","WP_084902797_1","Streptomyces sp. CB03238","5410","1","33.48","no","MTYDLAVWEGERPADDLTAGEVFTDFSNRYIDGEHDDPPTERIAIYVAALLERWCDITEDEEDASPSTGPLIDEASGPLIYFAMRWSMREEASAYAVDLADSMGLVCFDMQLDRLRP","WP_084902797_1","none"
"910","WP_125813086","WP_125813086_6","WP_125813086_6","Streptomyces","none","none","WP_125813086_6","Streptomyces sp. WAC07149","7711","6","14.01","no","MAVWEGVRPVDDAAATATFEELFGKHMRHGGGQKTVPTPLIREYVEALVARWPDLSPDDDEEDEDASPWSDGPLIDNASGPLLYFAMVFSKHQEATSFAAPLARSLGLICFDPQDERLIC","WP_125813086_6","none"
"911","WP_033306993","WP_033306993_1","WP_033306993_1","Streptomyces","Ribosomally synthesized peptide prototyped by Fra","PF14407.6","WP_033306993_1","Streptomyces iakyrus","2133","1","51.3","yes","MATPLTAEGKQRIEEILARAAEDIEFREALLLSPETALSDTELTESERELLATMKRVALEEWGVDVRKFRAFLMDNGYGRGND","WP_033306993_1","4.10E-08"
"912","WP_029068734","WP_029068734_1","WP_029068734_1","Jonesia","Ribosomally synthesized peptide prototyped by Fra","PF14407.6","WP_029068734_1","Jonesia quinghaiensis DSM 15701","2133","1","31.82","yes","MIAPITPESKERVEEILTKAAQDISFREALLEDPESTLESYDLSPDEKFALSTMKRVALEEWGIDVRNYRAFLMDNGFKMI","WP_029068734_1","3.90E-12"
"913","WP_034274384","WP_034274384_1","WP_034274384_1","Amycolatopsis","Nitrile hydratase, alpha chain","PF02979.16","WP_034274384_1","Amycolatopsis halophila YIM 93223","2197","1","42.91","yes","MTSSVPQLDDNAKQRVEAILARAADDIAFREQLLADPEAALEDSDLTDDEKTALSTMRRVALEEWGVDVRRFRAFLMDNGNKFWTGEDVEPAV","WP_034274384_1","1.50E-06"
"914","WP_081655210","WP_081655210_1","WP_081655210_1","Amycolatopsis","Ribosomally synthesized peptide prototyped by Fra","PF14407.6","WP_081655210_1","Amycolatopsis orientalis DSM 43388","2186","1","47.6","yes","MTSSVPQLDEDAKQRVEAVLSRAAEDIEFRELLLADPEAALKDSDLTDDERTALSTMRRVALEEWGVDVRRFRAFLMDNGNKFWTGEDVEPAV","WP_081655210_1","1.70E-11"
"915","WP_093655900","WP_093655900_1","WP_093655900_1","Streptomyces","Ribosomal protein S18","PF01084.20","WP_093655900_1","Streptomyces radiopugnans","4964","1","57.02","no","MPRRPDPRKNAKPRPNPLDAAGITYIDYKDTDLLRKFVSDRGKIRSRRVTRVTSQQQRQLARAIKNAREMALLPYSSR","WP_093655900_1","2.10E-28"
"916","WP_085014622","WP_085014622_1","WP_085014622_1","Frankia","Ribosomal protein S18","PF01084.20","WP_085014622_1","Frankia sp. KB5","5473","1","31.48","no","MTNRHRRPVKNPRKKPNILIERGITYVDYKDTALLRMFISDRGKIRARRVTGLTPKQHREVARAIKNAREMALLPYSTRPR","WP_085014622_1","7.70E-28"
"917","WP_093849541","WP_093849541_4","WP_093849541_4","Streptomyces","Ribosomal protein S18","PF01084.20","WP_093849541_4","Streptomyces pini","4877","4","40.54","no","MPRRTDPRGNTKPRPNPLDTAGITYIDYKDTDLLRKFVSDRGKIRSRRVTRVTAQQQRQLARAIRNAREMALLPYGSR","WP_093849541_4","3.30E-28"
"918","WP_085014620","WP_085014620_1","WP_085014620_1","Frankia","Ribosomal protein S18","PF01084.20","WP_085014620_1","Frankia sp. KB5","6935","1","31.48","no","MTNRHRRPVKNPRKKPNILIERGITYVDYKDTALLRMFISDRGKIRARRVTGLTPKQHREVARAIKNAREMALLPYSTRPR","WP_085014620_1","7.70E-28"
"919","WP_131883639","WP_131883639_1","WP_131883639_1","Actinomadura","Coenzyme PQQ synthesis protein D (PqqD)","PF05402.12","WP_131883639_1","Actinomadura sp. KC345","10","1","42.8","yes","MTVYAPAGGVECNDLGEQMLLTTPSGKYLVLEGTAVVLWRLIDGSRTLDDLAAACGREYEGDPAQIRRDLAEVLDDWAGRGLVTAAA","WP_131883639_1","5.00E-20"
"920","WP_135231520","WP_135231520_1","WP_135231520_1","Nocardia","Coenzyme PQQ synthesis protein D (PqqD)","PF05402.12","WP_135231520_1","Nocardia sp. CS682","3","1","31.1","yes","MTTSTRYLPDPTITAQDLGDRILLAPLNGAYLVLEGSAATLWRLLDQPRSATELADECARRYSGVPDRIRTDIADTLQEWTERGLLRPDTSNPQSVETPRETA","WP_135231520_1","1.70E-17"
"921","WP_132175704","WP_132175704_1","WP_132175704_1","Actinomadura","Coenzyme PQQ synthesis protein D (PqqD)","PF05402.12","WP_132175704_1","Actinomadura sp. KC216","11","1","55.3","yes","MTVYAHAGDVESNDLGEQILLTTPSGKYLVLEGTAALLWRLIDGSRSLGDLAAACGAEYEGDAAQIREDLADVLDDWAGRGLVTAAV","WP_132175704_1","8.60E-21"
"922","WP_131965720","WP_131965720_1","WP_131965720_1","Actinomadura","Coenzyme PQQ synthesis protein D (PqqD)","PF05402.12","WP_131965720_1","Actinomadura sp. KC06","10","1","61.5","yes","MTVYAHAGDVESNDLGEQILLTTPSGKYLVLEGTAALLWRLIDGSRSLGDLAAACGAEYEGDAVQIREDLADVLDDWAGRGLVTAAA","WP_131965720_1","2.90E-20"
"923","KOG82578","KOG82578_1","KOG82578_1","Streptomyces","none","none","KOG82578_1","Streptomyces griseus subsp. rhodochrous","2543","1","37.46","yes","MPGVVLMNGGGFDGPEWSARVSLANLDDLDDLDDLKIGHHMRTVFEQYVEEWQGSSTGN","KOG82578_1","none"
"924","WP_083191919","WP_083191919_1","WP_083191919_1","Streptomyces","none","none","WP_083191919_1","Streptomyces violaceoruber","2380","1","38.38","yes","MPGVVLMNGGGFDGPEWSARVSLANLDDLDYLKIGNHMRTVFEQYVEEWQGSSTGN","WP_083191919_1","none"
"925","SDE31545","SDE31545_1","SDE31545_1","Streptomyces","none","none","SDE31545_1","Streptomyces sp. LaPpAH-199","2384","1","29.89","yes","MGHRVPPLADALDVLSDVALLGEAGAFHCPGGGVVVPGVVLMNGGGFDGPEWSARVSLANLDDLDYLKIGHHMRTVFEQYVEEWQGSSTGN","SDE31545_1","none"
"926","KOU46944","KOU46944_1","KOU46944_1","Streptomyces","none","none","KOU46944_1","Streptomyces sp. MMG1522","2561","1","34.27","yes","MPGVVLMNGGGFDGPEWSARVSLANLDDLDDLKIGHHMRTVFEQYVEEWQGSSTGN","KOU46944_1","none"
"927","WP_091051455","WP_091051455_1","WP_091051455_1","Glycomyces","Uncharacterised BCR, YnfA/UPF0060 family","PF02694.15","WP_091051455_1","Glycomyces sambucus","6138","1","74.38","yes","MDTARSISLFLLAAVAEIGGAWLIWQGLREHKGVLWIAAGVIALGAYGFVAAFQPDPNFGRILAAYGGIFVAGSLAWGMVVDGFRPDRWDVIGAAICLVGVAVIMYAPRG","WP_091051455_1","1.10E-47"
"928","WP_105032337","WP_105032337_4","WP_105032337_4","Arthrobacter","Uncharacterised BCR, YnfA/UPF0060 family","PF02694.15","WP_105032337_4","Arthrobacter ruber","107","4","47.19","no","MTTLRITLLFVLAAGAEIGGAWLIWQAVREGRPWWWAGLGVMALGAYGFVATLQPDANFGRILAAYGGVFVAGSLAWGMLVDGFRPDRWDVIGSSVCLVGVALIMFVPRPAA","WP_105032337_4","9.00E-46"
"929","SDL22458","SDL22458_1","SDL22458_1","Glycomyces","Uncharacterised BCR, YnfA/UPF0060 family","PF02694.15","SDL22458_1","Glycomyces sambucus","6129","1","74.38","yes","MDTARSISLFLLAAVAEIGGAWLIWQGLREHKGVLWIAAGVIALGAYGFVAAFQPDPNFGRILAAYGGIFVAGSLAWGMVVDGFRPDRWDVIGAAICLVGVAVIMYAPRG","SDL22458_1","1.10E-47"
"930","WP_104181080","WP_104181080_4","WP_104181080_4","Arthrobacter","Uncharacterised BCR, YnfA/UPF0060 family","PF02694.15","WP_104181080_4","Arthrobacter sp. B0490","69","4","55.68","no","MTILRIALLFVLAALAEIGGAWLIWQAVREGKPWWWAGLGVVALGAYGFVATLQADANFGRILAAYGGIFVAGSLAWGVLVDGFRPDRWDVLGSAVCLVGVGLIMFVPRTTA","WP_104181080_4","9.00E-45"
"931","SCL44965","SCL44965_4","SCL44965_4","Micromonospora","none","none","SCL44965_4","Micromonospora citrea","7966","4","17.38","no","MGRQMTAMLKGTLEGIVLAILSDRSAYGYEITA","SCL44965_4","none"
"932","WP_091094891","WP_091094891_2","WP_091094891_2","Micromonospora","none","none","WP_091094891_2","Micromonospora citrea","7966","2","17.38","no","MGRQMTAMLKGTLEGIVLAILSDRSAYGYEITA","WP_091094891_2","none"
"933","WP_111166051","WP_111166051_2","WP_111166051_2","Sphaerisporangium","Transcriptional regulator PadR-like family","PF03551.14","WP_111166051_2","Sphaerisporangium sp. 7K107","4935","2","62.57","yes","MDHLTEMLKGTLEGCVLEIIDSEETYGYAITRRLNELGFADVVEGTVYTILLRLERNRLVQVTKRPSGLGPPRKFYALNEAGRQELATFWAKWEYITSRIDKLKEGRR","WP_111166051_2","3.50E-26"
"934","WP_067972339","WP_067972339_2","WP_067972339_2","Nocardiopsis","Transcriptional regulator PadR-like family","PF03551.14","WP_067972339_2","Nocardiopsis trehalosi NBRC 14201","2970","2","85.88","no","MDDLREMLKGTLEGCVLEIIGGEETYGYAITRRLNDLGFADVVEGTVYTILLRLEKGGLVTVTKRPSEKGPPRKFYALNDAGRAELARFWEKWEYLSSRIDKLKEGGR","WP_067972339_2","2.20E-26"
"935","WP_132268317","WP_132268317_3","WP_132268317_3","Micromonospora","none","none","WP_132268317_3","Micromonospora sp. KC721","3751","3","8.53","yes","MVQASPFRVNEVGSPVLPVWLAWKPMVTDALGAMVSL","WP_132268317_3","none"
"936","WP_132388264","WP_132388264_4","WP_132388264_4","Micromonospora","none","none","WP_132388264_4","Micromonospora sp. KC723","5619","4","10.04","yes","MQADPFRVNEVGLPVLPVWLAWKPMFTDAFGAMLPL","WP_132388264_4","none"
"937","WP_132388266","WP_132388266_4","WP_132388266_4","Micromonospora","none","none","WP_132388266_4","Micromonospora sp. KC723","4444","4","10.04","yes","MQADPFRVNEVGLPVLPVWLAWKPMFTDAFGAMLPL","WP_132388266_4","none"
"938","WP_132268319","WP_132268319_3","WP_132268319_3","Micromonospora","none","none","WP_132268319_3","Micromonospora sp. KC721","4926","3","8.53","yes","MVQASPFRVNEVGSPVLPVWLAWKPMVTDALGAMVSL","WP_132268319_3","none"
"939","KHK96352","KHK96352_4","KHK96352_4","Microbacterium","none","none","KHK96352_4","Microbacterium mangrovi","2353","4","18.5","yes","MPMRIGRVGRVGMIGAPVARTAAVVGTAKVVSNGVDRRQDRRQDRRDDRHDRR","KHK96352_4","none"
"940","WP_082008308","WP_082008308_3","WP_082008308_3","Microbacterium","none","none","WP_082008308_3","Microbacterium mangrovi","2353","3","18.5","yes","MPMRIGRVGRVGMIGAPVARTAAVVGTAKVVSNGVDRRQDRRQDRRDDRHDRR","WP_082008308_3","none"
"941","WP_083982727","WP_083982727_3","WP_083982727_3","Actinomadura","none","none","WP_083982727_3","Actinomadura hibisca NBRC 15177","105","3","26.05","yes","MGYMIGAQVQSPTDAGVTPAEEVLLDRLEDTGEQQRDD","WP_083982727_3","none"
"942","WP_083982727","WP_083982727_4","WP_083982727_4","Actinomadura","none","none","WP_083982727_4","Actinomadura hibisca NBRC 15177","256","4","10.95","yes","MGWTGHMVVWPSDETPSPAEAVEARLDRPETGDGRQDD","WP_083982727_4","none"
"943","WP_017568552","WP_017568552_1","WP_017568552_1","Nocardiopsis","none","none","WP_017568552_1","Nocardiopsis synnemataformans DSM 44143","3494","1","25.47","yes","MNDQVLTNVEFDDLFDLTATEVTDGATPFGIIAEGSGAACYSDCARECK","WP_017568552_1","none"
"944","WP_017568553","WP_017568553_1","WP_017568553_1","Nocardiopsis","none","none","WP_017568553_1","Nocardiopsis synnemataformans DSM 44143","2148","1","25.47","yes","MNDQVLTNVEFDDLFDLTATEVTDGATPFGIIAEGSGAACYSDCARECK","WP_017568553_1","none"
"945","WP_078515914","WP_078515914_1","WP_078515914_1","Streptomyces","none","none","WP_078515914_1","Streptomyces sp. TAA040","3469","1","24.63","yes","MDAEETQLSEAEFDSLFDLSVTEVGEGATPFVIIGDGCVGCYTFCVAGCK","WP_078515914_1","none"
"946","WP_028427539","WP_028427539_1","WP_028427539_1","Streptomyces","none","none","WP_028427539_1","Streptomyces sp. TAA040","2124","1","24.63","yes","MDAEETQLSEAEFDSLFDLSVTEVGEGATPFVIIGDGCVGCYTFCVAGCK","WP_028427539_1","none"
"947","WP_091460541","WP_091460541_1","WP_091460541_1","Micromonospora","none","none","WP_091460541_1","Micromonospora inyonensis","3399","1","35.15","no","MVVDAGGDLPGLARGGLDAFTAAARAQLPRLGATRLYYAIVRGFFAALADPAGAATQRPGALERVGFLFDDWEHTASRLAEVEARMVGVLDAIGLTALVTSIP","WP_091460541_1","none"
"948","WP_018657395","WP_018657395_3","WP_018657395_3","Actinomadura","none","none","WP_018657395_3","Actinomadura flavalba DSM 45200","4093","3","5.64","yes","MTDVGAFKLLARASVPRTPA","WP_018657395_3","none"
"949","WP_121801511","WP_121801511_6","WP_121801511_6","Streptomyces","none","none","WP_121801511_6","Streptomyces griseocarneus","6043","6","11.97","yes","MREPPKLLAIVHALLHDFVEGAVYT","WP_121801511_6","none"
"950","WP_132172132","WP_132172132_2","WP_132172132_2","Actinomadura","none","none","WP_132172132_2","Actinomadura sp. KC216","4886","2","5.8","yes","MRKRPGTASGVGMLLAEVVGGAVISVGSGAFGLETRVTASRLPAGTGGSPIPATSSVPVYS","WP_132172132_2","none"
"951","WP_132388264","WP_132388264_3","WP_132388264_3","Micromonospora","none","none","WP_132388264_3","Micromonospora sp. KC723","5772","3","16.01","yes","MAFQPLVMLWPAGSVKPRLQPLIAVVPVLVMVTEAVRPVFHALTVYPTRQGPAGAVVG","WP_132388264_3","none"
"952","WP_132186408","WP_132186408_2","WP_132186408_2","Micromonospora","none","none","WP_132186408_2","Micromonospora sp. KC606","3242","2","17.33","yes","MYVAFQPLVMLCPVGSVKPRIQPLTVLAPVLVMVIEAVRPVFHALTVYPTRQG","WP_132186408_2","none"
"953","WP_132186409","WP_132186409_2","WP_132186409_2","Micromonospora","none","none","WP_132186409_2","Micromonospora sp. KC606","4418","2","17.33","yes","MYVAFQPLVMLCPVGSVKPRIQPLTVLAPVLVMVIEAVRPVFHALTVYPTRQG","WP_132186409_2","none"
"954","WP_132388266","WP_132388266_3","WP_132388266_3","Micromonospora","none","none","WP_132388266_3","Micromonospora sp. KC723","4597","3","16.01","yes","MAFQPLVMLWPAGSVKPRLQPLIAVVPVLVMVTEAVRPVFHALTVYPTRQGPAGAVVG","WP_132388266_3","none"
"955","AXK36690","AXK36690_2","AXK36690_2","Streptomyces","none","none","AXK36690_2","Streptomyces armeniacus","1153","2","40.3","no","MTPEQQTPGIAPDSSVDTDPMDTIDLTIEKLGPRLALDNTEGGSSATTGSCTLSGTMCGGRG","AXK36690_2","none"
"956","WP_027737668","WP_027737668_2","WP_027737668_2","Streptomyces","none","none","WP_027737668_2","Streptomyces sp. CNT360","1159","2","28.73","no","MAREDNSAAIPETGLEGAELEAIDLTIEKLTPRLALDSTEGGSSAVTGSCTLSGTMCGGRG","WP_027737668_2","none"
"957","AXK36692","AXK36692_1","AXK36692_1","Streptomyces","none","none","AXK36692_1","Streptomyces armeniacus","53","1","45.3","yes","MTPEQQTPGIAPDSSVDTDPMDTIDLTIEKLGPRLALDNTEGGSSATTGSCTLSGTMCGGRG","AXK36692_1","none"
"958","WP_027737671","WP_027737671_2","WP_027737671_2","Streptomyces","none","none","WP_027737671_2","Streptomyces sp. CNT360","133","2","33.73","yes","MAREDNSAAIPETGLEGAELEAIDLTIEKLTPRLALDSTEGGSSAVTGSCTLSGTMCGGRG","WP_027737671_2","none"
"959","WP_031012255","WP_031012255_4","WP_031012255_4","Streptomyces","none","none","WP_031012255_4","Streptomyces sp. NRRL F-5727","2534","4","50.56","yes","MHPLAPFRQLAQVALVGPAGAPPALAAIRFLALLPAGWEATLTGCDETAALLRLSAPAATTPAEATTALAALLADPALAGWRLTLPDDGMPEGRHPHDAGTAPRAGRPG","WP_031012255_4","none"
"960","WP_107442966","WP_107442966_6","WP_107442966_6","Streptomyces","none","none","WP_107442966_6","Streptomyces sp. P3","2824","6","28.23","yes","MSFSHQVSITGPSGAPPETAVIRFVALLPEGWHAEVGEFQGDLARLRITAPPGTTTSEATRMAADILSRPGLQGWRLADH","WP_107442966_6","none"
"961","WP_057576508","WP_057576508_4","WP_057576508_4","Streptomyces","none","none","WP_057576508_4","Streptomyces sp. Root264","2659","4","31.37","yes","MSFSHQVSITGPSGAPPETAVIRFVALLPEGWHAEVGEFQGDLARLRITAPPGTTPSEATRMAADILSRPGLQGWRLTDH","WP_057576508_4","none"
"962","WP_078909294","WP_078909294_8","WP_078909294_8","Streptomyces","none","none","WP_078909294_8","Streptomyces virginiae","2506","8","41.87","yes","MNSSYQVSISSLSGAPPETAAIRFMALLPAGWHAEVGELRENLARLVIAAPPGTTASQTTEIAADILSRPGLQDWQLADH","WP_078909294_8","none"
"963","WP_091553165","WP_091553165_2","WP_091553165_2","Klenkia","Carboxypeptidase regulatory-like domain","PF13620.6","WP_091553165_2","Klenkia taihuensis","7932","2","60.41","no","MSVSTHVLDSVLGRPAAGMVVQLFAGSSLVAEGVTDADGRFRLADHETGTGPHRVVFATGPWFAEQGRETFYPTVSLDFTVVDGAAHHHVPLLLAPFAFSTYRGS","WP_091553165_2","1.10E-10"
"964","SCX58064","SCX58064_2","SCX58064_2","Klenkia","Carboxypeptidase regulatory-like domain","PF13620.6","SCX58064_2","Klenkia marina","7677","2","55.65","no","MSVSTHVLDAVLGRPAAGVVVQLFAGDALIGEGVTDADGRFRLADRDTGTGPHRVVFGTGAWFAEQGRETFYPSVTLDFTVVDGSAHHHVPLLLSPFAFSTYRGS","SCX58064_2","4.00E-10"
"965","WP_091067169","WP_091067169_2","WP_091067169_2","Klenkia","Carboxypeptidase regulatory-like domain","PF13620.6","WP_091067169_2","Klenkia brasiliensis","7938","2","60.78","no","MSVSTHVLDSVLGRPAAGMVVQLFAGDELLGEGVTDADGRFRLADRDTGTGPHRVVFATGSWFLEQGRETFYPSVSLDFTVVDGTAHHHVPLLLAPFAFSTYRGS","WP_091067169_2","1.30E-09"
"966","WP_092807119","WP_092807119_2","WP_092807119_2","Klenkia","Carboxypeptidase regulatory-like domain","PF13620.6","WP_092807119_2","Klenkia marina","7443","2","55.65","no","MSVSTHVLDAVLGRPAAGVVVQLFAGDALIGEGVTDADGRFRLADRDTGTGPHRVVFGTGAWFAEQGRETFYPSVTLDFTVVDGSAHHHVPLLLSPFAFSTYRGS","WP_092807119_2","4.00E-10"
"967","OUE27579","OUE27579_2","OUE27579_2","Clavibacter","none","none","OUE27579_2","Clavibacter michiganensis","7300","2","16.42","no","MATLSANATAYGTVDNLSPGIACRLGVAFLSEALPYHFQDRVPMSGALLLISVCITRAALFLPKYSVVASLPIAYLMIELGALGKSSRLPTRQHVSYGKYT","OUE27579_2","none"
"968","WP_086513414","WP_086513414_3","WP_086513414_3","Clavibacter","none","none","WP_086513414_3","Clavibacter michiganensis","5957","3","16.42","no","MATLSANATAYGTVDNLSPGIACRLGVAFLSEALPYHFQDRVPMSGALLLISVCITRAALFLPKYSVVASLPIAYLMIELGALGKSSRLPTRQHVSYGKYT","WP_086513414_3","none"
"969","OUE27580","OUE27580_2","OUE27580_2","Clavibacter","none","none","OUE27580_2","Clavibacter michiganensis","5957","2","16.42","no","MATLSANATAYGTVDNLSPGIACRLGVAFLSEALPYHFQDRVPMSGALLLISVCITRAALFLPKYSVVASLPIAYLMIELGALGKSSRLPTRQHVSYGKYT","OUE27580_2","none"
"970","WP_086513413","WP_086513413_3","WP_086513413_3","Clavibacter","none","none","WP_086513413_3","Clavibacter michiganensis","7300","3","16.42","no","MATLSANATAYGTVDNLSPGIACRLGVAFLSEALPYHFQDRVPMSGALLLISVCITRAALFLPKYSVVASLPIAYLMIELGALGKSSRLPTRQHVSYGKYT","WP_086513413_3","none"
"971","WP_120571834","WP_120571834_1","WP_120571834_1","Micromonospora","none","none","WP_120571834_1","Micromonospora tulbaghiae","2454","1","39.68","yes","MRDTTFEPAETEEITFEAVEDQEVIPALHKHNSLLHTPFTWTETADA","WP_120571834_1","none"
"972","WP_123601959","WP_123601959_2","WP_123601959_2","Micromonospora","none","none","WP_123601959_2","Micromonospora sp. Llam0","3995","2","30.47","yes","MGDAVTFEAVEDEAITFEAVEDQEVIPALHKHNSLLHTPFEWAEPTDA","WP_123601959_2","none"
"973","WP_123601960","WP_123601960_2","WP_123601960_2","Micromonospora","none","none","WP_123601960_2","Micromonospora sp. Llam0","2598","2","30.47","yes","MGDAVTFEAVEDEAITFEAVEDQEVIPALHKHNSLLHTPFEWAEPTDA","WP_123601960_2","none"
"974","WP_120571833","WP_120571833_1","WP_120571833_1","Micromonospora","none","none","WP_120571833_1","Micromonospora tulbaghiae","3818","1","39.68","yes","MRDTTFEPAETEEITFEAVEDQEVIPALHKHNSLLHTPFTWTETADA","WP_120571833_1","none"
"975","WP_107657165","WP_107657165_1","WP_107657165_1","Nocardia","PqqA family","PF08042.11","WP_107657165_1","Nocardia suismassiliense","3428","1","27.02","yes","MEKMLWEKPRVRELPVAELESMAELDVAFAVITLCTDFN","WP_107657165_1","1.30E-06"
"976","WP_131965720","WP_131965720_2","WP_131965720_2","Actinomadura","none","none","WP_131965720_2","Actinomadura sp. KC06","3318","2","26.34","yes","MKRWEKPTIRELSITELESIAELDMAFAVITFCTDFA","WP_131965720_2","none"
"977","WP_132175704","WP_132175704_2","WP_132175704_2","Actinomadura","none","none","WP_132175704_2","Actinomadura sp. KC216","3318","2","24.74","yes","MKRWEKPTIRELSITELESIAELDMAFAVITFCTDFA","WP_132175704_2","none"
"978","WP_135231520","WP_135231520_2","WP_135231520_2","Nocardia","PqqA family","PF08042.11","WP_135231520_2","Nocardia sp. CS682","3426","2","28.77","yes","MEKMLWEKPRVRELPVAELESMAELDVAFAVITLCTDFN","WP_135231520_2","1.30E-06"
"979","KDN17331","KDN17331_1","KDN17331_1","Amycolatopsis","none","none","KDN17331_1","Amycolatopsis rifamycinica","113","1","30.28","yes","MNSLVLPTAAELEADIADTRPEQFSAYISVFTEAAYENSELCGC","KDN17331_1","none"
"980","WP_067592598","WP_067592598_1","WP_067592598_1","Amycolatopsis","none","none","WP_067592598_1","Amycolatopsis sp. M39","61","1","26.74","yes","MNEIVLPTAAELEADLASVRSEKISTFQSPFAEGVAESSELCGC","WP_067592598_1","none"
"981","WP_116200011","WP_116200011_1","WP_116200011_1","Amycolatopsis","none","none","WP_116200011_1","Amycolatopsis circi","60","1","28.27","yes","MHEIVLPTAAELEADLAGVRSEKISTFQSPFAEGVAESSELCGC","WP_116200011_1","none"
"982","WP_084093827","WP_084093827_1","WP_084093827_1","Amycolatopsis","none","none","WP_084093827_1","Amycolatopsis rifamycinica","101","1","30.28","yes","MNSLVLPTAAELEADIADTRPEQFSAYISVFTEAAYENSELCGC","WP_084093827_1","none"
"983","OMC50887","OMC50887_1","OMC50887_1","Mycobacterium","none","none","OMC50887_1","Mycobacterium sp. IS-2888","7223","1","28.35","yes","MSDEPITIANEFSEVVVRRVDTRNGSRLLISAPKTGRWISLDALEIEALTRQNSRTLAAMVGNPDGPLLPDEGER","OMC50887_1","none"
"984","OMC41183","OMC41183_1","OMC41183_1","Mycobacterium","none","none","OMC41183_1","Mycobacterium sp. IS-1264","7286","1","28.55","yes","MSDEPITIANEFSEVVVRRVDTRNGSRLLISAPKTGRWISLDALEIEALTRQNSRTLAAMVGNSDGPLLPDEGER","OMC41183_1","none"
"985","WP_083679341","WP_083679341_1","WP_083679341_1","Mycobacterium","none","none","WP_083679341_1","Mycobacterium sp. IS-1264","7214","1","28.55","yes","MSDEPITIANEFSEVVVRRVDTRNGSRLLISAPKTGRWISLDALEIEALTRQNSRTLAAMVGNSDGPLLPDEGER","WP_083679341_1","none"
"986","WP_083667099","WP_083667099_1","WP_083667099_1","Mycobacterium","none","none","WP_083667099_1","Mycobacterium sp. SP-6446","7213","1","36.15","yes","MSDGAITIANEFAEVVVRRVDTRNGSRLLISAPKSGRSISLDALEIEALTRQNIRTLAAMVGNPDGPLLPDEGER","WP_083667099_1","none"
"987","WP_091040567","WP_091040567_3","WP_091040567_3","Glycomyces","none","none","WP_091040567_3","Glycomyces harbinensis","82","3","41.81","yes","MNTAQHVEVTDQFIGRLISSTDAAGGPVAGADAPAADPGDSLVHAISVWAHTHSEAPAYN","WP_091040567_3","none"
"988","WP_091051455","WP_091051455_3","WP_091051455_3","Glycomyces","none","none","WP_091051455_3","Glycomyces sambucus","81","3","41.09","yes","MSMSSVEMTDEFISRLIGAAEAPDGPVADAPAADPGDGTVHAISQWAHTHSDAPAYT","WP_091051455_3","none"
"989","SDL22458","SDL22458_3","SDL22458_3","Glycomyces","none","none","SDL22458_3","Glycomyces sambucus","72","3","41.09","yes","MSMSSVEMTDEFISRLIGAAEAPDGPVADAPAADPGDGTVHAISQWAHTHSDAPAYT","SDL22458_3","none"
"990","SDE51953","SDE51953_2","SDE51953_2","Glycomyces","none","none","SDE51953_2","Glycomyces harbinensis","88","2","41.81","yes","MNTAQHVEVTDQFIGRLISSTDAAGGPVAGADAPAADPGDSLVHAISVWAHTHSEAPAYN","SDE51953_2","none"
"991","SDE31545","SDE31545_5","SDE31545_5","Streptomyces","none","none","SDE31545_5","Streptomyces sp. LaPpAH-199","2444","5","8.56","no","MVADLEVVEVVEVGEGDPGGPFGAVEAAAVHEDDAGHNHASARTMERAGLTEEGYIREHIQRVGQWRDSVTHSILDHEYQQDEPGPRRVEKR","SDE31545_5","none"
"992","KOU46944","KOU46944_2","KOU46944_2","Streptomyces","none","none","KOU46944_2","Streptomyces sp. MMG1522","2621","2","17.11","no","MVADLEVVEVVEVGEGDPGGPFGAVEAAAVHEDDAGHNHASARTMERAGLTEEGYIREHIQRAGQWRDSVTHSILDHEYQQDEPGPRRVEKR","KOU46944_2","none"
"993","WP_083191919","WP_083191919_5","WP_083191919_5","Streptomyces","none","none","WP_083191919_5","Streptomyces violaceoruber","2440","5","10.57","no","MVADLEVVEVVEVGEGDPGGPFGAVEAAAVHEDDAGHNHASARTMERACLTEEGYIREHIQRAGQWRDSVTHSILDHEYQQDEPGPRRVEKR","WP_083191919_5","none"
"994","KOG82578","KOG82578_3","KOG82578_3","Streptomyces","none","none","KOG82578_3","Streptomyces griseus subsp. rhodochrous","2603","3","19.71","no","MVADLEVVEVVEVVEVGEGDPGGPFGAVEAAAVHEDDAGHNHASARTMERAGLTEEGYIREHIQRAGQWRDSVTHSILDHEYQQDEPGPRRVEKR","KOG82578_3","none"
"995","SDY68794","SDY68794_1","SDY68794_1","Geodermatophilus","AraC-binding-like domain","PF14525.6","SDY68794_1","Geodermatophilus africanus","5985","1","54.34","yes","MTGPVDLAAVLRRLDRPWQPRTVAVLNDYDVRVVRTRGEFTRHSHPETDEVFLVLSGSLTIRMDAGDVTLGPGQLYVVPRGTPHQPFSEHGAEVLLVEPSATVNTGDTPSELTAERRPA","SDY68794_1","5.10E-06"
"996","WP_091216389","WP_091216389_1","WP_091216389_1","Geodermatophilus","ChrR Cupin-like domain","PF12973.7","WP_091216389_1","Geodermatophilus siccatus","5798","1","70.91","yes","MTGPVDLAAVLSRIDRPWQPRTVAVLNDYDVRVVRTHGEFTRHSHPETDEVFLVLSGSLTIRMDDGDVALGPGQLYVVPRGTPHQPFSPDGAEVLLVEPSATVNTGDSPGELTAERRLA","WP_091216389_1","3.20E-09"
"997","SDL97273","SDL97273_1","SDL97273_1","Geodermatophilus","ChrR Cupin-like domain","PF12973.7","SDL97273_1","Geodermatophilus siccatus","5786","1","70.91","yes","MTGPVDLAAVLSRIDRPWQPRTVAVLNDYDVRVVRTHGEFTRHSHPETDEVFLVLSGSLTIRMDDGDVALGPGQLYVVPRGTPHQPFSPDGAEVLLVEPSATVNTGDSPGELTAERRLA","SDL97273_1","3.20E-09"
"998","WP_091159224","WP_091159224_1","WP_091159224_1","Geodermatophilus","AraC-binding-like domain","PF14525.6","WP_091159224_1","Geodermatophilus africanus","6021","1","54.34","yes","MTGPVDLAAVLRRLDRPWQPRTVAVLNDYDVRVVRTRGEFTRHSHPETDEVFLVLSGSLTIRMDAGDVTLGPGQLYVVPRGTPHQPFSEHGAEVLLVEPSATVNTGDTPSELTAERRPA","WP_091159224_1","5.10E-06"
"999","WP_084211656","WP_084211656_1","WP_084211656_1","Pseudonocardia","Probable cobalt transporter subunit (CbtB)","PF09489.10","WP_084211656_1","Pseudonocardia acaciae DSM 45401","3559","1","43.35","no","MTSHAFGQPGASSAGAGSRPVPLSVSGALPWLLGALVFGLALYYLVGIDEGATSVFGNTMAVHELMHDARHFLGFPCH","WP_084211656_1","6.20E-22"
"1000","ODU05661","ODU05661_1","ODU05661_1","Pseudonocardia","Probable cobalt transporter subunit (CbtB)","PF09489.10","ODU05661_1","Pseudonocardia sp. SCN 72-86","6412","1","34.5","no","MASTAVAERPVAIPVSDTLPWLIGAAVIGLLLYYFIGIDQGATSVFGNNMIVHEFVHDGRHFLGFPCH","ODU05661_1","6.30E-23"
"1001","ALE82507","ALE82507_1","ALE82507_1","Pseudonocardia","Probable cobalt transporter subunit (CbtB)","PF09489.10","ALE82507_1","Pseudonocardia sp. HH130629-09","2875","1","47.73","no","MSASTHAGAPVAARPLTIPVSETMPWLIGALVLGLLLYYFIGIDEGATSVFGNTMVIHEFVHDGRHFLAFPCH","ALE82507_1","3.20E-22"
"1002","WP_132047282","WP_132047282_3","WP_132047282_3","Actinomadura","Probable cobalt transporter subunit (CbtB)","PF09489.10","WP_132047282_3","Actinomadura sp. 7K534","968","3","31.83","no","MANLVPPATSARPAPIRLPLREIVPWALFAVVLGLTILYFVGAEQGATSLFSGSAIHEFMHDGRHIVGSPCH","WP_132047282_3","2.70E-19"
"1003","WP_026174640","WP_026174640_2","WP_026174640_2","Acaricomes","none","none","WP_026174640_2","Acaricomes phytoseiuli DSM 14247","731","2","15.34","yes","MDHHIVVPEVMETEPGSIMPEVLIDLDFEHEGQHIPPARMSNGASCCSSSSCTLPPTRN","WP_026174640_2","none"
"1004","SEB29931","SEB29931_2","SEB29931_2","Arthrobacter","none","none","SEB29931_2","Arthrobacter woluwensis","916","2","17.73","yes","MSTILTAEPVVETAPGWQMPAILQELDFEISGAIATPAKMDGGPVITVSSSCSSSGRPKNPKQQ","SEB29931_2","none"
"1005","AJT41785","AJT41785_1","AJT41785_1","Psychromicrobium","none","none","AJT41785_1","Psychromicrobium lacuslunae","841","1","25.42","yes","MSTTLTALPVVETAPGKIMPEALISLDFKANGPLVTPATMGDDGVTVTLCSSTSIQTRPTKD","AJT41785_1","none"
"1006","SEC29390","SEC29390_3","SEC29390_3","Arthrobacter","none","none","SEC29390_3","Arthrobacter woluwensis","957","3","12.72","yes","MSTALTIAPIVETEPGHVMPRQLKELDFETGGSLVTPAKMDGDTVTLSSSCSSARPTSPKAP","SEC29390_3","none"
"1007","WP_082057091","WP_082057091_1","WP_082057091_1","Psychromicrobium","none","none","WP_082057091_1","Psychromicrobium lacuslunae","805","1","25.42","yes","MSTTLTALPVVETAPGKIMPEALISLDFKANGPLVTPATMGDDGVTVTLCSSTSIQTRPTKD","WP_082057091_1","none"
"1008","WP_091289566","WP_091289566_1","WP_091289566_1","Amycolatopsis","none","none","WP_091289566_1","Amycolatopsis xylanica","3730","1","26.84","no","MFDITKVSDAELLATAGAETVEFALSAVAPSVMTGEPCD","WP_091289566_1","none"
"1009","SFB39971","SFB39971_1","SFB39971_1","Amycolatopsis","none","none","SFB39971_1","Amycolatopsis marina","3602","1","16.05","no","MIDIAQISDNELLTAAGATSVDFSDAATAPSVMAGEPCDS","SFB39971_1","none"
"1010","WP_091674323","WP_091674323_1","WP_091674323_1","Amycolatopsis","none","none","WP_091674323_1","Amycolatopsis marina","3491","1","16.05","no","MIDIAQISDNELLTAAGATSVDFSDAATAPSVMAGEPCDS","WP_091674323_1","none"
"1011","WP_091289566","WP_091289566_3","WP_091289566_3","Amycolatopsis","none","none","WP_091289566_3","Amycolatopsis xylanica","3515","3","21.92","no","MFDITKVSDAELLATAGAATVEFALSAVAPSVMTGEPCD","WP_091289566_3","none"
"1012","WP_091289566","WP_091289566_2","WP_091289566_2","Amycolatopsis","none","none","WP_091289566_2","Amycolatopsis xylanica","3979","2","23.62","no","MFDITKVSDAELLATAGAETVEFALSAVAPSVMTGEPCD","WP_091289566_2","none"
"1013","OQM68597","OQM68597_1","OQM68597_1","Bifidobacterium","Cro/C1-type HTH DNA-binding domain","PF13443.6","OQM68597_1","Bifidobacterium longum subsp. infantis","6129","1","30.54","yes","MTIRINLDVMMAKRKIGVGELAEQIGITPANVSILKNGRAKAVRFTTLDAICKALDCQPGDILEWEDDD","OQM68597_1","3.80E-27"
"1014","WP_080684945","WP_080684945_2","WP_080684945_2","Bifidobacterium","Cro/C1-type HTH DNA-binding domain","PF13443.6","WP_080684945_2","Bifidobacterium breve","5544","2","29.66","yes","MTIRINLDVMMAKRKIGVGELAEQIGITPANVSILKNGRAKAVRFTTLDAICKALDCQPGDVLEWEDDD","WP_080684945_2","1.30E-26"
"1015","WP_132339706","WP_132339706_2","WP_132339706_2","Nonomuraea","Cro/C1-type HTH DNA-binding domain","PF13443.6","WP_132339706_2","Nonomuraea sp. KC201","3359","2","35.73","no","MSPAENPEHAIEVHLDRLLEERGMTVVELADKVGITNVNLSILKNNRAKAIRFSTLSKICEVLGCQPGDLLSFTPRSSG","WP_132339706_2","1.30E-23"
"1016","WP_082248115","WP_082248115_1","WP_082248115_1","Bifidobacterium","Cro/C1-type HTH DNA-binding domain","PF13443.6","WP_082248115_1","Bifidobacterium longum subsp. infantis","6129","1","30.54","yes","MTIRINLDVMMAKRKIGVGELAEQIGITPANVSILKNGRAKAVRFTTLDAICKALDCQPGDILEWEDDD","WP_082248115_1","3.80E-27"
"1017","WP_124284474","WP_124284474_1","WP_124284474_1","Streptomyces","Cro/C1-type HTH DNA-binding domain","PF13443.6","WP_124284474_1","Streptomyces sp. ADI92-24","5520","1","46.18","yes","MPEEELHSIRIHLDRLLVERGMTLTELSAQVGITVVNLSVLKNGRAKAIRFSTLSRICDILGCQPGDLITHEPAGPAEPAQ","WP_124284474_1","2.50E-24"
"1018","WP_109092842","WP_109092842_1","WP_109092842_1","Ancrocorticia","none","none","WP_109092842_1","Ancrocorticia populi","2028","1","0.58","no","MILHFRTVSNYAVAQEDVDVQHDVHVDEHEEDEEDEQVDPKAISAKST","WP_109092842_1","none"
"1019","WP_133246044","WP_133246044_3","WP_133246044_3","Ancrocorticia","none","none","WP_133246044_3","Ancrocorticia populi","6403","3","0.58","no","MILHFRTVSNYAVAQEDVDVQHDVHVDEHEEDEEDEQVDPKAISAKST","WP_133246044_3","none"
"1020","KTR94659","KTR94659_3","KTR94659_3","Microbacterium","none","none","KTR94659_3","Microbacterium testaceum","6495","3","7.32","no","MAHDDVEVQHEVHVDEQDDDEDDEHVEPNAISE","KTR94659_3","none"
"1021","WP_081323045","WP_081323045_3","WP_081323045_3","Microbacterium","none","none","WP_081323045_3","Microbacterium testaceum","6495","3","7.32","no","MAHDDVEVQHEVHVDEQDDDEDDEHVEPNAISE","WP_081323045_3","none"
"1022","PWF27333","PWF27333_3","PWF27333_3","Ancrocorticia","none","none","PWF27333_3","Ancrocorticia populi","6403","3","0.58","no","MILHFRTVSNYAVAQEDVDVQHDVHVDEHEEDEEDEQVDPKAISAKST","PWF27333_3","none"
"1023","PJJ39560","PJJ39560_1","PJJ39560_1","Streptomyces","none","none","PJJ39560_1","Streptomyces sp. CNZ306","4322","1","64.24","no","MTEEFTTDLDDGMLGFFRDIAGVMVRRIGISRAEAVARINRAFGGMEIGPYPDLMCHELPEYWAYGLYYAGDVPYWEPEADAAGWEVRPAPAAGGPEWTLPEG","PJJ39560_1","none"
"1024","WP_078572841","WP_078572841_1","WP_078572841_1","Streptomyces","none","none","WP_078572841_1","Streptomyces sp. CNZ288","4400","1","64.34","no","MTEEFTTDLDDGMLGFFRDIAGVMVRRIGISRAEAVARINRAFGGMEIGPYPDLMCHELPEYWAYGLYYAGDVPYWEPEADAAGWEVRPAPAAGGPEWTLPEG","WP_078572841_1","none"
"1025","WP_078564093","WP_078564093_1","WP_078564093_1","Streptomyces","none","none","WP_078564093_1","Streptomyces sp. CNQ329","7926","1","65.04","no","MTEEFTTELDDGMLKYFRDIADVMVERIGISRAEAVARINKAYGGADIEPYPDIMCHELPEYWAYGLYYAGNVPYWEPDADPSGWEVREAPPKGGPEWTLPEE","WP_078564093_1","none"
"1026","RZU94771","RZU94771_1","RZU94771_1","Streptomyces","none","none","RZU94771_1","Streptomyces sp. CNZ288","4523","1","64.34","no","MTEEFTTDLDDGMLGFFRDIAGVMVRRIGISRAEAVARINRAFGGMEIGPYPDLMCHELPEYWAYGLYYAGDVPYWEPEADAAGWEVRPAPAAGGPEWTLPEG","RZU94771_1","none"
"1027","WP_100302786","WP_100302786_1","WP_100302786_1","Streptomyces","none","none","WP_100302786_1","Streptomyces sp. CNZ306","4283","1","64.24","no","MTEEFTTDLDDGMLGFFRDIAGVMVRRIGISRAEAVARINRAFGGMEIGPYPDLMCHELPEYWAYGLYYAGDVPYWEPEADAAGWEVRPAPAAGGPEWTLPEG","WP_100302786_1","none"
"1028","SDC53518","SDC53518_2","SDC53518_2","Geodermatophilus","none","none","SDC53518_2","Geodermatophilus telluris","6866","2","37.11","no","MSSRTYRVVVRGVLDGLDDDRRAWLRDRAAEHDLFASAFTEEGTTAYDGRLAAFSHRVVVRVEPGPDEEAVACTAGELSALRWLENAGVGARRLRSTATCTDDVRVRRR","SDC53518_2","none"
"1029","WP_089404560","WP_089404560_3","WP_089404560_3","Geodermatophilus","none","none","WP_089404560_3","Geodermatophilus saharensis","6762","3","45.64","no","MSSRTYRVIVRGTFDGLDDDRRAWLREHAAEHDLFASAFTERGSTAYDGSLSAFSHRVVVHVDAGPDEEADARTAGELSALQWLEDAGLGARRLRSTATCTDDVRIRRR","WP_089404560_3","none"
"1030","WP_091365795","WP_091365795_2","WP_091365795_2","Geodermatophilus","none","none","WP_091365795_2","Geodermatophilus telluris","6881","2","37.11","no","MSSRTYRVVVRGVLDGLDDDRRAWLRDRAAEHDLFASAFTEEGTTAYDGRLAAFSHRVVVRVEPGPDEEAVACTAGELSALRWLENAGVGARRLRSTATCTDDVRVRRR","WP_091365795_2","none"
"1031","WP_073419543","WP_073419543_2","WP_073419543_2","Geodermatophilus","none","none","WP_073419543_2","Geodermatophilus nigrescens","6732","2","41.36","no","MSTRTYRVIVRGVLDGLDDDRRAWLRDHAAEHDLFASSFTERGSTAYDGSLAAFSHRVVVHVDPGPGEEDDARTAGELSALQWLEEVGVGARRLRSTATCTDDVRIRRR","WP_073419543_2","none"
"1032","SHF79230","SHF79230_2","SHF79230_2","Geodermatophilus","none","none","SHF79230_2","Geodermatophilus nigrescens","6723","2","41.36","no","MSTRTYRVIVRGVLDGLDDDRRAWLRDHAAEHDLFASSFTERGSTAYDGSLAAFSHRVVVHVDPGPGEEDDARTAGELSALQWLEEVGVGARRLRSTATCTDDVRIRRR","SHF79230_2","none"
"1033","WP_089298084","WP_089298084_1","WP_089298084_1","Actinoplanes","none","none","WP_089298084_1","Actinoplanes regularis","4","1","83.67","yes","MSETPDANDDFIARYTTLMLAVWNDAETERRLVADPRAEALTAGLPVQPNAAVVLDRSQPDGVFSRETLVADWTADPGRHVLHVPAAPMIDLDELDERQLDLIAAGSSDTNVVIVLCVVA","WP_089298084_1","none"
"1034","WP_046567642","WP_046567642_1","WP_046567642_1","Micromonospora","none","none","WP_046567642_1","Micromonospora sp. HK10","29","1","73.0","yes","MTKYSELVTAVWRSDEELGRLLADPTGYATAAGLPVAPGAVVEVDRAQPATLYTKEQIVADWSGTPGRHVLHVPEVPLVDLNELTEAELESVAGGVAAVADNNVNVIAVLIV","WP_046567642_1","none"
"1035","PWK29583","PWK29583_1","PWK29583_1","Actinoplanes","none","none","PWK29583_1","Actinoplanes xinjiangensis","57","1","98.15","yes","MSTEDFSEFDRAYQSLLAKVWGDEAALAALLADPKRFAVEAGLPVDPAATVTVDRTQPEELLTRTEILQAFNGTPGTHVLRVPEHAPIDLSELTDDDLELIAAGGNNNINLYQSK","PWK29583_1","none"
"1036","WP_093610459","WP_093610459_1","WP_093610459_1","Actinoplanes","none","none","WP_093610459_1","Actinoplanes philippinensis","71","1","108.58","yes","MSAEETDFSEFDRAYQGLLAKVWGDDAALAALLADPKQFAVEAGLPVDPAATVTVDRSQPEELLTRTEILQAFHGTPGTHVLRVPEHAPIDLSELTDEDLELIAAGINVNINLYQAK","WP_093610459_1","none"
"1037","WP_089157775","WP_089157775_1","WP_089157775_1","Micromonospora","none","none","WP_089157775_1","Micromonospora sp. NBS 11-29","29","1","69.48","yes","MTKYSELVTAVWRSDEELQRLLADPTGYATAAGLPVAPGATVEVDRAQPATLYTKEQIVADWSGTPGRHVLHVPEVPLVDLNELTEAELETVAGGVAPVADNNVNIIAVLIV","WP_089157775_1","none"
"1038","AKS13949","AKS13949_2","AKS13949_2","Corynebacterium","none","none","AKS13949_2","Corynebacterium pseudotuberculosis","6852","2","1.78","yes","MNRFPANENIGVNVGQSKMPTQAPAAVSVH","AKS13949_2","none"
"1039","WP_048589183","WP_048589183_3","WP_048589183_3","Corynebacterium","none","none","WP_048589183_3","Corynebacterium pseudotuberculosis","6852","3","1.78","yes","MNRFPANENIGVNVGQSKMPTQAPAAVSVH","WP_048589183_3","none"
"1040","AIG09585","AIG09585_3","AIG09585_3","Corynebacterium","none","none","AIG09585_3","Corynebacterium pseudotuberculosis","6851","3","1.03","yes","MNRFPANENIGVNVGQSKMPIQAPAAVSVH","AIG09585_3","none"
"1041","AKP09252","AKP09252_3","AKP09252_3","Corynebacterium","none","none","AKP09252_3","Corynebacterium pseudotuberculosis","6852","3","1.78","yes","MNRFPANENIGVNVGQSKMPTQAPAAVSVH","AKP09252_3","none"
"1042","AER69640","AER69640_3","AER69640_3","Corynebacterium","none","none","AER69640_3","Corynebacterium pseudotuberculosis 1/06-A","6852","3","1.78","yes","MNRFPANENIGVNVGQSKMPTQAPAAVSVH","AER69640_3","none"
"1043","WP_081384789","WP_081384789_1","WP_081384789_1","Actinomyces","thiazolyl_B: thiazolylpeptide-type bacteriocin","NF033400.3","WP_081384789_1","Actinomyces oris","6199","1","12.46","yes","MSDSTIIDGLEFQDLSDAFAGIEVLELDETMTLSETAASSGISSCNSCSCCLSTSCCSVHIGA","WP_081384789_1","8.50E-18"
"1044","OLO48687","OLO48687_1","OLO48687_1","Actinomyces","thiazolyl_B: thiazolylpeptide-type bacteriocin","NF033400.3","OLO48687_1","Actinomyces oris","6409","1","12.46","yes","MSDSTIIDGLEFQDLSDAFAGIEVLELDETMTLSETAASSGISSCNSCSCCLSTSCCSVHIGA","OLO48687_1","8.50E-18"
"1045","WP_075410821","WP_075410821_9002","WP_075410821_9002","Actinomyces","thiazolyl_B: thiazolylpeptide-type bacteriocin","NF033400.3","WP_075410821_9002","Actinomyces oris","11727","9002","12.46","yes","MSDSTIIDGLEFQDLSDAFAGIEVLELDETMTLSETAASSGISSCNSCSCCLSTSCCSVHIGA","WP_075410821_9002","8.50E-18"
"1046","WP_082508744","WP_082508744_1","WP_082508744_1","Microbacterium","thiazolyl_B: thiazolylpeptide-type bacteriocin","NF033400.3","WP_082508744_1","Microbacterium sp. Leaf161","6221","1","15.62","yes","MSETMELADIDVMFDEIEIIELDETVTLSETAASSVSSSCNSCSCCASTSCCSVNVFVGL","WP_082508744_1","1.90E-17"
"1047","KQR47999","KQR47999_1","KQR47999_1","Microbacterium","thiazolyl_B: thiazolylpeptide-type bacteriocin","NF033400.3","KQR47999_1","Microbacterium sp. Leaf161","6227","1","15.62","yes","MSETMELADIDVMFDEIEIIELDETVTLSETAASSVSSSCNSCSCCASTSCCSVNVFVGL","KQR47999_1","1.90E-17"
"1048","WP_046085362","WP_046085362_4","WP_046085362_4","Streptomyces","none","none","WP_046085362_4","Streptomyces antioxidans","328","4","14.16","yes","MIDLTAAENAELDDLFTDAEPAPYSAADGVNGITPVDR","WP_046085362_4","none"
"1049","WP_078841030","WP_078841030_4","WP_078841030_4","Streptomyces","none","none","WP_078841030_4","Streptomyces antioxidans","1991","4","15.49","yes","MIDLTAAENAELDDLFTDTEPTPYSAADGVEGLTPVGC","WP_078841030_4","none"
"1050","OPF84252","OPF84252_4","OPF84252_4","Streptomyces","none","none","OPF84252_4","Streptomyces antioxidans","2048","4","15.49","yes","MIDLTAAENAELDDLFTDTEPTPYSAADGVEGLTPVGC","OPF84252_4","none"
"1051","OPF84252","OPF84252_2","OPF84252_2","Streptomyces","none","none","OPF84252_2","Streptomyces antioxidans","325","2","21.03","yes","MIDLTAAENAELDDLFTDTETTPYSAADGTVGGFTLVDR","OPF84252_2","none"
"1052","WP_078841030","WP_078841030_2","WP_078841030_2","Streptomyces","none","none","WP_078841030_2","Streptomyces antioxidans","268","2","21.03","yes","MIDLTAAENAELDDLFTDTETTPYSAADGTVGGFTLVDR","WP_078841030_2","none"
"1053","WP_104820017","WP_104820017_1","WP_104820017_1","Kitasatospora","thiazolyl_B: thiazolylpeptide-type bacteriocin","NF033400.3","WP_104820017_1","Kitasatospora sp. MMS16-BH015","6092","1","62.61","yes","MSNAVDFAAFDVNELAVLDAKDAVALPEMGASVLFIFNYTEDGEEILTEDTLNGSGSASTSSSCC","WP_104820017_1","5.80E-09"
"1054","WP_104820017","WP_104820017_3","WP_104820017_3","Kitasatospora","thiazolyl_B: thiazolylpeptide-type bacteriocin","NF033400.3","WP_104820017_3","Kitasatospora sp. MMS16-BH015","6325","3","57.97","yes","MSNAVDFAAFDVNELAVLDAKDAVALPEMGASVLFIFNYTEDGEEILTEDTLNGSGSASTSSSCC","WP_104820017_3","5.80E-09"
"1055","WP_051778263","WP_051778263_1","WP_051778263_1","Kitasatospora","thiazolyl_B: thiazolylpeptide-type bacteriocin","NF033400.3","WP_051778263_1","Kitasatospora phosalacinea","5509","1","64.03","yes","MSTAVDFAAFDVNELAVLDANDAVALPDMGASVIIIFGYTEDGEEILTEDSLNSEAAGSGSLSTSSSCC","WP_051778263_1","3.00E-08"
"1056","WP_057236399","WP_057236399_1","WP_057236399_1","Kitasatospora","thiazolyl_B: thiazolylpeptide-type bacteriocin","NF033400.3","WP_057236399_1","Kitasatospora sp. Root107","6059","1","66.63","yes","MSTAVDFAAFDVNELAVLDANDAVALPDMGASVIIIFGYTEDGEEILTEDTLNNADAGSGSLSTSSSCC","WP_057236399_1","3.00E-08"
"1057","WP_104820017","WP_104820017_2","WP_104820017_2","Kitasatospora","thiazolyl_B: thiazolylpeptide-type bacteriocin","NF033400.3","WP_104820017_2","Kitasatospora sp. MMS16-BH015","5847","2","61.76","yes","MSNAVDFAAFDVNELAVLDAKDAVALPEMGASVLFIFAYTEDGEEVLTEDSLNASGSASTSSSCC","WP_104820017_2","5.80E-09"
"1058",,"WP_049563074_2","",,,,,,,,,,,"WP_049563074_2",
"1059","WP_057611617","WP_057611617_3","WP_057611617_3","Streptomyces","CutA1 divalent ion tolerance protein","PF03091.15","WP_057611617_3","Streptomyces sp. Root369","5358","3","38.38","yes","MTQFVQVSTATPERQQAVELAKGAVEGRLAAGSQIIGPVGSVFWHLGEFGEGEEWRLLLTTTSDRYPELEKYLLEKHPWDNPEVIAVPIAHGAPRCLQWIEDSVAPES","WP_057611617_3","2.20E-27"
"1060","WP_101404757","WP_101404757_2","WP_101404757_2","Streptomyces","CutA1 divalent ion tolerance protein","PF03091.15","WP_101404757_2","Streptomyces sp. OK885","4499","2","33.31","yes","MTTYVQVSTATAAREEAVELAKGAVQQRLAAGSQIIGPVGSVFWHLGEFGEGEEWRLTLTTTADRYPALEAYLLERHPWDNPEVIGVPISHGAPRCLQWIADSVNPEN","WP_101404757_2","4.50E-26"
"1061","WP_028441277","WP_028441277_2","WP_028441277_2","Streptomyces","CutA1 divalent ion tolerance protein","PF03091.15","WP_028441277_2","Streptomyces sp. DpondAA-D4","3340","2","47.3","no","MEAYVQVSTATETEEQAVALAGPAVERRLAAGAQVIGPVTSVFWHLGAYGTGVEWQLLLKTTAERYPDLEAYLLEHHPWDNPEVCAVPLVAGGDGCLKWIRDSVKDPVGEAG","WP_028441277_2","2.10E-25"
"1062","WP_018522479","WP_018522479_2","WP_018522479_2","Streptomyces","CutA1 divalent ion tolerance protein","PF03091.15","WP_018522479_2","Streptomyces sp. KhCrAH-43","3868","2","51.67","yes","MTDYVQVSTATETRDEAVALAGRAVQARLAAGAQIVGPVTSVFWHLGEYGTGEEWQVLLKTTADRYGELEAYLLDQHPWDNPEVCAVAITQGADRCLQWIEDSVKRT","WP_018522479_2","9.30E-27"
"1063","ADD99586","ADD99586_6","ADD99586_6","Cutibacterium","none","none","ADD99586_6","Cutibacterium acnes SK137","1523","6","8.55","no","MQITVKTIKDHRVRTVQTAMSSALGIGSQVDMLAPGGSTSSSSGSCCSCSTCAVVAQPQD","ADD99586_6","none"
"1064","EGR94682","EGR94682_5","EGR94682_5","Cutibacterium","none","none","EGR94682_5","Cutibacterium acnes SK182","1524","5","8.55","no","MQITVKTIKDHRVRTVQTAMSSALGIGSQVDMLAPGGSTSSSSGSCCSCSTCAVVAQPQD","EGR94682_5","none"
"1065","WP_075371528","WP_075371528_1","WP_075371528_1","Actinomyces","none","none","WP_075371528_1","Actinomyces oris","3609","1","30.1","yes","MKLTTTSSLEHRVRTTQFAVTSTFGGASVNVDLLAPGGSTCSSAGSSSSCSTCAVTAPVR","WP_075371528_1","none"
"1066","ADD99586","ADD99586_1","ADD99586_1","Cutibacterium","none","none","ADD99586_1","Cutibacterium acnes SK137","4510","1","21.1","yes","MKLTTTSSLEHRIRTSQPAVTSVFGGADANVDLLAPGGSTCSSAGSSSSCSTCAVTATVR","ADD99586_1","none"
"1067","EGR94682","EGR94682_2","EGR94682_2","Cutibacterium","none","none","EGR94682_2","Cutibacterium acnes SK182","4329","2","21.1","yes","MKLTTTSSLEHRIRTSQPAVTSVFGGADANVDLLAPGGSTCSSAGSSSSCSTCAVTATVR","EGR94682_2","none"
"1068","WP_108724550","WP_108724550_2","WP_108724550_2","Streptosporangium","none","none","WP_108724550_2","Streptosporangium minutum","128","2","28.66","yes","MAENLPPESELPTPGTDEEHVPFTVEMMELDSNPIILQPKSY","WP_108724550_2","none"
"1069","KPC95547","KPC95547_1","KPC95547_1","Streptomyces","none","none","KPC95547_1","Streptomyces sp. NRRL F-6602","71","1","34.44","yes","MTDDRNLDVDDVTEATARPENAENTPAGRVPFTVEMMELDNNPIVLQMKSY","KPC95547_1","none"
"1070","WP_031027146","WP_031027146_2","WP_031027146_2","Streptomyces","none","none","WP_031027146_2","Streptomyces sp. NRRL F-5639","70","2","35.37","yes","MTDDRNLDVDDVTEGTARPENAESTSAGRVPFTVEMMELDNNPIVLQMKSY","WP_031027146_2","none"
"1071","WP_107100134","WP_107100134_1","WP_107100134_1","Streptomyces","none","none","WP_107100134_1","Streptomyces albus","13","1","36.39","yes","MTDDRNLDVDDVTEATTRPENAENTSAGRVPFTVEMMELDNNPIVLQMKSY","WP_107100134_1","none"
"1072","WP_110666035","WP_110666035_1","WP_110666035_1","Streptomyces","none","none","WP_110666035_1","Streptomyces tateyamensis","97","1","44.29","yes","MTENTAPQNNENTEDQTAEEAAGTVPFTVELTELDSNPIVLQPKSY","WP_110666035_1","none"
"1073","EUA04475","EUA04475_3","EUA04475_3","Mycobacterium","none","none","EUA04475_3","Mycobacterium kansasii 824","2537","3","9.75","no","MRGLLTRARLPAVPRQRVVSPARPESSASEFDPDRGWRLHPQVAVRPEPFGALLYHFGTRKLSFLKNRTIVTVVQSLADYPDVRSACRGAGVADSGQAPYLHALGVLAASTMLIPREDR","EUA04475_3","none"
"1074","WP_122441228","WP_122441228_1","WP_122441228_1","Mycobacterium","none","none","WP_122441228_1","Mycobacterium attenuatum","2563","1","11.93","no","MPDCPAVPRQRVVSPARSESSASEFDPDRGWRLHPQVAVRPEPFGALLYHFGTRKLSFLKNRTILTVVQSLADYPDVRSACRGAGVADSGQAPYLHALGVLAASTMLIPREDG","WP_122441228_1","none"
"1075","WP_023370892","WP_023370892_1","WP_023370892_1","Mycobacterium","none","none","WP_023370892_1","Mycobacterium kansasii","2528","1","20.33","no","MPDCPAVPRQRVVSPARPESSASEFDPDRGWRLHPQVAVRPEPFGALLYHFGTRKLSFLKNRTIVTVVQSLADYPDVRSACRGAGVADSGQAPYLHALGVLAASTMLIPREDR","WP_023370892_1","none"
"1076","OOK66964","OOK66964_2","OOK66964_2","Mycobacterium","none","none","OOK66964_2","Mycobacterium kansasii","2589","2","16.33","no","MVSPARPESSASEFDPDRGWRLHPQVAVRPEPFGALLYHFGTRKLSFLKNRTIVTVVQSLADYPDVRSACRGAGVADSGQAPYLHALGVLAASTMLIPREDR","OOK66964_2","none"
"1077","WP_063469930","WP_063469930_2","WP_063469930_2","Mycobacterium","none","none","WP_063469930_2","Mycobacterium kansasii","2306","2","8.23","no","MAVRPEPFGALLYHFGTRKLSFLKNRTLLTVVQSLADYPDVRSACRGAGVADSGQRPYLDALGVLAASAMLVPREGR","WP_063469930_2","none"
"1078","WP_056678071","WP_056678071_6","WP_056678071_6","Angustibacter","none","none","WP_056678071_6","Angustibacter sp. Root456","3758","6","14.89","no","MNDDAELAGHDAVDADVAEEKHPDAASAAPSGMASMSSPRSTANRSSSCVLTMGISR","WP_056678071_6","none"
"1079","WP_055699111","WP_055699111_7","WP_055699111_7","Streptomyces","none","none","WP_055699111_7","Streptomyces luteocolor","4048","7","18.99","no","MRKPPFSGAVTAPLKGRSRARRAGAETVSASEAPPAGAGHPYDDAVVALLAELTGQDAHAADVAVEKEPRALPCGSSSTKSSSSIA","WP_055699111_7","none"
"1080","WP_093640559","WP_093640559_4","WP_093640559_4","Streptomyces","none","none","WP_093640559_4","Streptomyces sp. SceaMP-e96","3834","4","13.21","no","MLLAELVGQEKELAEVELLKEPSALPCGSSSMDSSLSRA","WP_093640559_4","none"
"1081","WP_126382680","WP_126382680_3","WP_126382680_3","Actinomyces","none","none","WP_126382680_3","Actinomyces howellii","3290","3","16.13","no","MDEQAMLEAQPGQDAEAELLGHEAEAELLGHEAQAPEKAQPRALPSGSSSTPKSLSARVRSIVA","WP_126382680_3","none"
"1082","VEG28624","VEG28624_3","VEG28624_3","Actinomyces","none","none","VEG28624_3","Actinomyces howellii","3290","3","16.13","no","MDEQAMLEAQPGQDAEAELLGHEAEAELLGHEAQAPEKAQPRALPSGSSSTPKSLSARVRSIVA","VEG28624_3","none"
"1083","WP_078966254","WP_078966254_1","WP_078966254_1","Streptomyces","none","none","WP_078966254_1","Streptomyces sp. WM6378","855","1","66.36","no","MDQPAVTRYTTDAERANIAGIELNPDDVAHVMDLVNKGLVGAAAMHEAAVQEDMALSAKVTVQLTRGGIAGADGGVEELTGTEEITGTVRASKIFLDPDKAPTTDS","WP_078966254_1","none"
"1084","PIF99032","PIF99032_1","PIF99032_1","Streptomyces","none","none","PIF99032_1","Streptomyces sp. 1121.2","992","1","82.78","no","MDQPQQQAVTRYTTPEEQANISGIDLNTDDVEHVMDLVKKGLVGAAAMHEGAVQEDMALTANVTVTLTRGGIADEDGTVGELVGTEEIGGTIRARKQFLDPALAPKTDG","PIF99032_1","none"
"1085","WP_128433746","WP_128433746_1","WP_128433746_1","Streptomyces","none","none","WP_128433746_1","Streptomyces cyaneus","1156","1","76.39","no","MSESQPKLTRFTTSEERENIVGIDLDPVDVDHYMDIVKKGLVEAAAAADAAVQDNFGLRAEVSIRLSRPVADGDDIKEVVGRHTATGRLKARKVYIDPEQAPKVD","WP_128433746_1","none"
"1086","WP_050514186","WP_050514186_1","WP_050514186_1","Streptomyces","none","none","WP_050514186_1","Streptomyces rimosus subsp. rimosus","987","1","86.7","no","MDEPVTRYTTPEEKENIAGIDLDADDVQHVLDLVNKGLVGAAALHEAAVQENMALGANVIVSLTRGGIAAGDGSVEDLTGTEEITATIRARKIFLDPAQAPPSDS","WP_050514186_1","none"
"1087","WP_099938361","WP_099938361_1","WP_099938361_1","Streptomyces","none","none","WP_099938361_1","Streptomyces sp. 1121.2","845","1","82.78","no","MDQPQQQAVTRYTTPEEQANISGIDLNTDDVEHVMDLVKKGLVGAAAMHEGAVQEDMALTANVTVTLTRGGIADEDGTVGELVGTEEIGGTIRARKQFLDPALAPKTDG","WP_099938361_1","none"
"1088","WP_050507047","WP_050507047_1","WP_050507047_1","Streptomyces","none","none","WP_050507047_1","Streptomyces griseoflavus","977","1","73.07","no","MDHPTTPVTRYTTPEEKANIAGIDLNADDVDYVMDLVKKGLVGAAALHEAAVQEDMALGANVTVALTRGGIAAEDGGDEELTGTEEVTGTIRARKIFLDPAQAPENDS","WP_050507047_1","none"
"1089","WP_071967420","WP_071967420_1","WP_071967420_1","Streptomyces","thiovirid_RiPP: thioviridamide family RiPP peptid","NF033415.1","WP_071967420_1","Streptomyces cinnamoneus","71","1","27.67","yes","MGGKDMRSAALSELADLSPEQLQTFLETRSGAGECFFTAPRAQSVRGAGESFFTAPRAQSVRGAGESFFTAPRAQTVR","WP_071967420_1","1.70E-09"
"1090","WP_017557210","WP_017557210_1","WP_017557210_1","Nocardiopsis","Protein of unknown function (DUF2749)","PF10907.8","WP_017557210_1","Nocardiopsis baichengensis YIM 90130","146","1","60.06","yes","MSEKVSRPCGDLNGLAELGPDRLQSFLEARAGTAVRGAGDSFFTAPRAQTVRGVGDSFFAAPKAQTVRGVGDSFFAAPKAQTVRGVGDSFFAAPKAQTVR","WP_017557210_1","0.0022"
"1091","WP_030877129","WP_030877129_1","WP_030877129_1","Streptomyces","thiovirid_RiPP: thioviridamide family RiPP peptid","NF033415.1","WP_030877129_1","Streptomyces varsoviensis","255","1","50.7","yes","MRKDSDLRLDDLAHVNPEQLQGFLEERSTAAVHGATDAYFSGPRAQTVRGATDAHFSAPRAQTVRGATDAHFSAPRAQTVRGATDAHFSAPRAQTVRGATDSYFSAPRAQNVR","WP_030877129_1","3.30E-07"
"1092","WP_073700824","WP_073700824_1","WP_073700824_1","Nocardiopsis","thiovirid_RiPP: thioviridamide family RiPP peptid","NF033415.1","WP_073700824_1","Nocardiopsis sp. TSRI0078","143","1","37.85","yes","MTKVNAQSHEELTRLAELAPEELQSFLEGRSGVGAGDSFFAAPRAQTVRGAGDSFFAAPRAQTVRGAGDSFFAAPKAQTVR","WP_073700824_1","2.90E-09"
"1093","WP_089254486","WP_089254486_1","WP_089254486_1","Asanoa","thiovirid_RiPP: thioviridamide family RiPP peptid","NF033415.1","WP_089254486_1","Asanoa hainanensis","79","1","30.67","yes","MRDNVDAVELAEVSPAELQELLEEELGLAAGDTGCAAFAAPIKQD","WP_089254486_1","8.60E-10"
"1094","WP_090799956","WP_090799956_1","WP_090799956_1","Asanoa","thiovirid_RiPP: thioviridamide family RiPP peptid","NF033415.1","WP_090799956_1","Asanoa ishikariensis","109","1","35.71","yes","MKDNVDAVELAEVSPVELQQLLEDELGLAVGDTGCAAFAAPIRQE","WP_090799956_1","3.50E-08"
"1095","WP_119286192","WP_119286192_1","WP_119286192_1","Streptomyces","Putative mono-oxygenase ydhR","PF08803.11","WP_119286192_1","Streptomyces sp. YIM 130001","6904","1","53.42","no","MYLQIVMWDLKKSEATVESLREYLRDYAVDAYSTLDGMRLKAWFSNAERQLWGAVYLWDDADRVPGLYSVSRAIERIGYPPTSVGGFTLEATAEGKSVHEALSGLGVALEGQAK","WP_119286192_1","5.60E-09"
"1096","WP_091094839","WP_091094839_1","WP_091094839_1","Micromonospora","Putative mono-oxygenase ydhR","PF08803.11","WP_091094839_1","Micromonospora citrea","1575","1","82.62","no","MYLQFVLWDLSKSDVSVEDLRGYLRDYAVEAYSRLPGMRLKMWFANPERQVWGAVYLWDGAEYMDGPARVSRAVRLIGYPPTSVSVFEVEAVAEGDSAYENLTALGRAFT","WP_091094839_1","3.50E-09"
"1097","WP_093656413","WP_093656413_1","WP_093656413_1","Streptomyces","Putative mono-oxygenase ydhR","PF08803.11","WP_093656413_1","Streptomyces wuyuanensis","7031","1","51.66","no","MYLSIVMWDLKKSEATVESLREYLRDYAVDAYSTLEGMRLKAWFSDADRQLWGAVYLWDRADQMPGLYGVSRVVELIGYPPTSVGGFALEAIAEGKSVHETLAGLGVALEGGAP","WP_093656413_1","8.30E-08"
"1098","WP_120688998","WP_120688998_1","WP_120688998_1","Micromonospora","Putative mono-oxygenase ydhR","PF08803.11","WP_120688998_1","Micromonospora sp. MS1-9","1501","1","70.6","no","MYLQFVLWDLSKSSVSVEDLRGYLRDYAVEAYSQLPGMRLKTWFANSDRQVWGAVYLWDGAEYMDGPARVSRAVELIGYPPTSVSVFDVEAIAEGASAYDGLMALGRAFA","WP_120688998_1","5.40E-09"
"1099","WP_127935985","WP_127935985_6","WP_127935985_6","Nonomuraea","none","none","WP_127935985_6","Nonomuraea polychroma","118","6","12.28","yes","MPLKAWFSNSARQVWGAVYLWDAAAQLDGPPRVSRAIELIGYPPTSVSVFELEATAQGRSVHATLKGLGRALETTSGTLHSVESARDGAPPGTRTPDPLIKSQLL","WP_127935985_6","none"
"1100","WP_051709136","WP_051709136_1","WP_051709136_1","Streptomyces","Putative mono-oxygenase ydhR","PF08803.11","WP_051709136_1","Streptomyces atroolivaceus","7030","1","64.52","no","MYLSIVMWDLKKSEATVESLREYLRDYAVDAYSALDGMRLKAWFSDSARQLWGAVYLWDSPEQMPGLYKVSRVIDLIGYPPTSVGGFTLEATAEGKSVHETLAGLGIALEGGTQ","WP_051709136_1","5.30E-08"
"1101","WP_084436210","WP_084436210_1","WP_084436210_1","Actinomyces","Transposase DDE domain","PF01609.21","WP_084436210_1","Actinomyces gerencseriae DSM 6844","401","1","38.33","yes","MEVVYLVCSLPMEQAQPEQVAAWVQGHWGIENRLHWVRDVVFDEDRHQLRTRNGPEIMAALRNLAIGLIRLVHGPGAGIASTTRSLSRRPKQAIKLITQPST","WP_084436210_1","2.00E-14"
"1102","WP_028567914","WP_028567914_3","WP_028567914_3","Salinispora","Transposase DDE domain","PF01609.21","WP_028567914_3","Salinispora tropica CNT261","4942","3","9.98","no","MSREVHVRICGGRRVRLPPSTRHWAIESLHWIRDTCYREDHSRVRTRSGPRVLASLRNLAINALRLAGRSDITEATRWASRNMTRPFAILGLTS","WP_028567914_3","3.70E-07"
"1103","WP_018962008","WP_018962008_3","WP_018962008_3","Streptomyces","none","none","WP_018962008_3","Streptomyces sp. CNB091","5794","3","29.42","no","TGSQPAAWIRGHWRIENQPHHVRDRTFHEDASHIRTRHPPRVMAGLRNLAIGVHRQDGHTNIAAALRHTARNHLRPLTALGLI","WP_018962008_3","none"
"1104","WP_018962008","WP_018962008_2","WP_018962008_2","Streptomyces","none","none","WP_018962008_2","Streptomyces sp. CNB091","5815","2","34.42","yes","TGSQPAAWIRGHWRIENQPHHVRDRTFHEDASHIRTRHPPRVMAGLRNLAIGVHRQDGHTNIAAALRHTARNHLRPLTALGLI","WP_018962008_2","none"
"1105","WP_084692314","WP_084692314_1","WP_084692314_1","Frankia","Transposase","PF01548.17","WP_084692314_1","Frankia elaeagni","2965","1","23.76","no","MGAGIGYRPHSRRRPARCWLLSARNLRNVPGRKTGTGDAAWIAELVEYGLVRPSFVPPQPIRELHDLTRYGRTQIDERIPESLRNLAIAVLRLTGVTNIAAGIRHHARRPERPPHEHEA","WP_084692314_1","2.20E-10"
"1106","WP_084692311","WP_084692311_3","WP_084692311_3","Frankia","Transposase","PF01548.17","WP_084692311_3","Frankia elaeagni","6548","3","23.76","no","MGAGIGYRPHSRRRPARCWLLSARNLRNVPGRKTGTGDAAWIAELVEYGLVRPSFVPPQPIRELHDLTRYGRTQIDERIPESLRNLAIAVLRLTGVTNIAAGIRHHARRPERPPHEHEA","WP_084692311_3","2.20E-10"
"1107","WP_093655900","WP_093655900_3","WP_093655900_3","Streptomyces","Ribosomal protein L31","PF01197.18","WP_093655900_3","Streptomyces radiopugnans","6397","3","41.3","no","MKPGIHPPYRPVVFRDRSADFAFLTRSTMTSDKTIEWEDGNTYPVVDVEISSASHPFYTGTQRVLDTAGRVERFERRYGSRGAR","WP_093655900_3","2.70E-34"
"1108","WP_093849541","WP_093849541_2","WP_093849541_2","Streptomyces","Ribosomal protein L31","PF01197.18","WP_093849541_2","Streptomyces pini","6315","2","45.93","no","MKPGIHPAYRPVVFRDRSAGFAFLTRSTMTSDKAIEWEDGNTYPMVDVEISSASHPFYTGTQRVLDTAGRVERFERRYGSRGARR","WP_093849541_2","6.70E-35"
"1109","WP_027743449","WP_027743449_1","WP_027743449_1","Streptomyces","Ribosomal protein L31","PF01197.18","WP_027743449_1","Streptomyces sp. CNT371","5728","1","59.57","yes","MKPGIHPSYGPVVFRDRAANFAFLTRSTATSEQTVTWEDGNTYPVIDVEISSASHPFYTGRTRVLETAGRVERFERRYARHQER","WP_027743449_1","7.00E-32"
"1110","WP_124799873","WP_124799873_1","WP_124799873_1","Nakamurella","Ribosomal protein L31","PF01197.18","WP_124799873_1","Nakamurella sp. s14-144","7929","1","26.44","no","MKPGIHPAYRPVVFRDATTGEQFLTKSTADSDKQVVWTNGNTYPLITVDVTSASHPFWTGTARIVDTAGQVEKFNRRYGQRKRAI","WP_124799873_1","3.80E-35"
"1111","WP_085014622","WP_085014622_3","WP_085014622_3","Frankia","Ribosomal protein L31","PF01197.18","WP_085014622_3","Frankia sp. KB5","7538","3","28.5","yes","MKKDIHPDYHPVVFQDRSTGKSFLTRSTATSDRTIDWEDGNVYPLIAVDITADSHPLWTGDQRVIDTAGRVEKFNRRYGKRSR","WP_085014622_3","1.20E-34"
"1112","WP_093766414","WP_093766414_1","WP_093766414_1","Streptomyces","Ribosomal protein L31","PF01197.18","WP_093766414_1","Streptomyces sp. F-7","5953","1","52.82","no","MKPGIHPAYGPVVFRDRAANYAFLTRSTMTSDKTIEWEDGNTYPVVDVEISHVSHPFYTGTARVLDTAGRVERFERRYGRRGAN","WP_093766414_1","1.00E-31"
"1113","WP_132388264","WP_132388264_1","WP_132388264_1","Micromonospora","Cellulose binding domain","PF00553.19","WP_132388264_1","Micromonospora sp. KC723","5609","1","65.38","no","PTTAPAGPCRVGYTVNAWNTGLTASVTITNTGTTAINGWSLGFTLPAGQSITSGWNATYTPTSGAVTASNVSYNGSIAPNASVNIGFQANHTGNTGRPTSFTLNGSACTIA","WP_132388264_1","1.40E-34"
"1114","WP_132186409","WP_132186409_1","WP_132186409_1","Micromonospora","Cellulose binding domain","PF00553.19","WP_132186409_1","Micromonospora sp. KC606","4261","1","56.65","no","PCRVGYTVNAWNTGLTASITITNTGASTVNGWILGFTLPTGQSITSGWNATYTPTSGAVTARHVSYNGSIAPNASVNIGFQANHTGNTARPTSFTLNGTACTVA","WP_132186409_1","2.20E-34"
"1115","WP_132268319","WP_132268319_1","WP_132268319_1","Micromonospora","Cellulose binding domain","PF00553.19","WP_132268319_1","Micromonospora sp. KC721","4919","1","64.13","no","PPSSPPPTTTPPPAGGPCRVGYTVNAWNTGLTASVTITNTGATPINGWSLGFTLPAGQSITSGWNATYTPTSGAVTARNVSYNETIAPNASVTIGFQASHTGNTGEPTSFTLNGLACTIA","WP_132268319_1","4.50E-35"
"1116","WP_132268317","WP_132268317_1","WP_132268317_1","Micromonospora","Cellulose binding domain","PF00553.19","WP_132268317_1","Micromonospora sp. KC721","3744","1","64.13","no","PPSSPPPTTTPPPAGGPCRVGYTVNAWNTGLTASVTITNTGATPINGWSLGFTLPAGQSITSGWNATYTPTSGAVTARNVSYNETIAPNASVTIGFQASHTGNTGEPTSFTLNGLACTIA","WP_132268317_1","4.50E-35"
"1117","WP_132186408","WP_132186408_1","WP_132186408_1","Micromonospora","Cellulose binding domain","PF00553.19","WP_132186408_1","Micromonospora sp. KC606","3085","1","56.65","no","PCRVGYTVNAWNTGLTASITITNTGASTVNGWILGFTLPTGQSITSGWNATYTPTSGAVTARHVSYNGSIAPNASVNIGFQANHTGNTARPTSFTLNGTACTVA","WP_132186408_1","2.20E-34"
"1118","WP_132388266","WP_132388266_1","WP_132388266_1","Micromonospora","Cellulose binding domain","PF00553.19","WP_132388266_1","Micromonospora sp. KC723","4434","1","65.38","no","PTTAPAGPCRVGYTVNAWNTGLTASVTITNTGTTAINGWSLGFTLPAGQSITSGWNATYTPTSGAVTASNVSYNGSIAPNASVNIGFQANHTGNTGRPTSFTLNGSACTIA","WP_132388266_1","1.40E-34"
"1119","WP_091247291","WP_091247291_1","WP_091247291_1","Klenkia","none","none","WP_091247291_1","Klenkia soli","1936","1","70.92","no","MDSFVTCAVVETTETHAFELGLALELDVPTGVVVREDPHVAGVFYLESGTEAEDAQRALALVLQTTAVLAARLGVPTEVTEVSVLSLEGATCWLAGDAVPTSVLPPH","WP_091247291_1","none"
"1120","WP_092807119","WP_092807119_1","WP_092807119_1","Klenkia","none","none","WP_092807119_1","Klenkia marina","1221","1","76.1","no","MWSSLVPTYLTCAVVQTPEAYSFGMDLALRMDAPEGTTTREDPHVPGTHYVESTVQAPDLATALTSSGLAVAGLVAGAGLPGEVVEITVLGDDGAVTWVPGVELPAADLLVPEAEHPGR","WP_092807119_1","none"
"1121","SCX58064","SCX58064_1","SCX58064_1","Klenkia","none","none","SCX58064_1","Klenkia marina","1455","1","76.1","no","MWSSLVPTYLTCAVVQTPEAYSFGMDLALRMDAPEGTTTREDPHVPGTHYVESTVQAPDLATALTSSGLAVAGLVAGAGLPGEVVEITVLGDDGAVTWVPGVELPAADLLVPEAEHPGR","SCX58064_1","none"
"1122","SDG90099","SDG90099_1","SDG90099_1","Klenkia","none","none","SDG90099_1","Klenkia brasiliensis","183","1","73.72","no","MQTFVTCAVVQTDLRHAFEVGVALRLEAPEGTAVREDPHVPEVFYLEATTTATDVQRALAATAQSVSTLLAGLDLPAEVDEVVVVTLDGAVRWVPGVDAALPAADTH","SDG90099_1","none"
"1123","WP_091553165","WP_091553165_1","WP_091553165_1","Klenkia","none","none","WP_091553165_1","Klenkia taihuensis","92","1","81.48","no","MESFVTCAVVETDLRHAFEVGVALRLEAPEGTAVREDPHVPEVFYLEATTAAADVQRAVAAAAQSTTTLLAGLDLPAEVHEVVVLSLDGAVHWVPDVDAALPAGESSH","WP_091553165_1","none"
"1124","WP_091067169","WP_091067169_1","WP_091067169_1","Klenkia","none","none","WP_091067169_1","Klenkia brasiliensis","120","1","73.72","no","MQTFVTCAVVQTDLRHAFEVGVALRLEAPEGTAVREDPHVPEVFYLEATTTATDVQRALAATAQSVSTLLAGLDLPAEVDEVVVVTLDGAVRWVPGVDAALPAADTH","WP_091067169_1","none"
"1125","WP_133437797","WP_133437797_1","WP_133437797_1","Mycobacterium","Trm112p-like protein","PF03966.16","WP_133437797_1","Mycobacterium paragordonae","6494","1","32.3","no","MPMLDDTLLNILVCPADRGPLLLVNDGRELYNPRLRRAYRIDDGIPVLLVDEARDVGDEEHARLTA","WP_133437797_1","2.70E-13"
"1126","WP_055578070","WP_055578070_3","WP_055578070_3","Mycobacterium","Trm112p-like protein","PF03966.16","WP_055578070_3","Mycobacterium gordonae","6468","3","30.97","no","MPMLDDTLLNILVCPGDRGPLLLVNEGRELYNPRLRRAYRIDDGIPVLLVDEARDVDDEEHARLTA","WP_055578070_3","9.20E-13"
"1127","WP_083271029","WP_083271029_2","WP_083271029_2","Mycobacterium","Trm112p-like protein","PF03966.16","WP_083271029_2","Mycobacterium gordonae","5102","2","28.49","no","MPMLDDTLLNILVCPADRGPLLLVNDGRELYNPRLRRAYRIDDGIPVLLVDEARDVDDEEHGRLTA","WP_083271029_2","1.30E-13"
"1128","RUP01435","RUP01435_2","RUP01435_2","Mycobacterium","Trm112p-like protein","PF03966.16","RUP01435_2","Mycobacterium sp.","6482","2","37.65","no","MPMLDDTLLNILVCPADRGPLLLVNEGRELYNPRLRRAYRIDDGIPVLLVDEARDVDDEEHARLTA","RUP01435_2","9.70E-14"
"1129","WP_085249702","WP_085249702_2","WP_085249702_2","Mycobacterium","Trm112p-like protein","PF03966.16","WP_085249702_2","Mycobacterium riyadhense","6300","2","19.13","no","MLDDTLLSILVCPADRGPLVLVDDGKCLYNPRLRRAYRIDDGIPVLLIDEARDVDDEEHARLMASGPADPQ","WP_085249702_2","2.10E-12"
"1130","ODR23958","ODR23958_2","ODR23958_2","Mycobacterium","Trm112p-like protein","PF03966.16","ODR23958_2","Mycobacterium gordonae","5103","2","28.49","no","MPMLDDTLLNILVCPADRGPLLLVNDGRELYNPRLRRAYRIDDGIPVLLVDEARDVDDEEHGRLTA","ODR23958_2","1.30E-13"
"1131","WP_091030566","WP_091030566_2","WP_091030566_2","Glycomyces","none","none","WP_091030566_2","Glycomyces harbinensis","4","2","42.23","yes","MGFILPSDEKLRAELEASAAESRDAKATHMEGSGNVYFKFTQTVGVDPADVHGE","WP_091030566_2","none"
"1132","SCL44965","SCL44965_3","SCL44965_3","Micromonospora","none","none","SCL44965_3","Micromonospora citrea","4","3","19.87","yes","MILVLPSAEDLRDEQGSTPDDRGWKSRDTAWSFKFTDSSGVEPADVHGA","SCL44965_3","none"
"1133","SCL44965","SCL44965_2","SCL44965_2","Micromonospora","none","none","SCL44965_2","Micromonospora citrea","5071","2","31.49","yes","MILVLPTAEELRDEQRSVPDDMDGRPKDSSWTFKFTDNSGVEPADVHGA","SCL44965_2","none"
"1134","WP_131761782","WP_131761782_2","WP_131761782_2","Actinomadura","none","none","WP_131761782_2","Actinomadura fibrosa","10","2","24.13","yes","MALHFPSAAELRDEQEPGEIQAVSRDTCWSVKLKDDADLEPADVHGA","WP_131761782_2","none"
"1135","WP_014176997","WP_014176997_1","WP_014176997_1","Streptomyces","none","none","WP_014176997_1","Streptomyces milbemycinicus","21","1","28.07","yes","MTLNFPTAAELRDEQHLKDPGASQMTSKDSHWCVKLKDNSGLEPADVHGA","WP_014176997_1","none"
"1136","WP_091094891","WP_091094891_1","WP_091094891_1","Micromonospora","none","none","WP_091094891_1","Micromonospora citrea","4993","1","31.49","yes","MILVLPTAEELRDEQRSVPDDMDGRPKDSSWTFKFTDNSGVEPADVHGA","WP_091094891_1","none"
"1137","WP_026413549","WP_026413549_9004","WP_026413549_9004","Actinomadura","thiazolyl_GetA: GE37468 family thiazolyl peptide","NF033399.1","WP_026413549_9004","Actinomadura oligospora ATCC 43269","11867","9004","26.04","no","MNGPEELDFDLRDVPMDVFDLAESGLTIESLTAGHGMPEHGASLPFCSCSATCSCCPSSS","WP_026413549_9004","3.60E-29"
"1138","WP_127935985","WP_127935985_5","WP_127935985_5","Nonomuraea","thiazolyl_GetA: GE37468 family thiazolyl peptide","NF033399.1","WP_127935985_5","Nonomuraea polychroma","79","5","24.22","yes","MSVSQGLDFSLENLPVDVFDLADSGLTVESLTAGHGMAEIGASLCGSCTCSALCSCSCSS","WP_127935985_5","5.00E-27"
"1139","WP_120688998","WP_120688998_9002","WP_120688998_9002","Micromonospora","thiazolyl_GetA: GE37468 family thiazolyl peptide","NF033399.1","WP_120688998_9002","Micromonospora sp. MS1-9","12152","9002","23.7","no","MKKSDELDFELEDLPMDVFDLAESGLTIESLTAGHGMPEHGASLPFCSCSATCSCCPSSSS","WP_120688998_9002","2.60E-29"
"1140","AEM00621","AEM00621_9001","AEM00621_9001","Streptomyces","thiazolyl_GetA: GE37468 family thiazolyl peptide","NF033399.1","AEM00621_9001","Streptomyces sp. ATCC 55365","8233","9001","38.56","yes","MGNNEEYFIDVNDLSIDVFDVVEQGGAVTALTADHGMPEVGASTNCFCYICCSCSSN","AEM00621_9001","3.20E-28"
"1141","WP_061921822","WP_061921822_9003","WP_061921822_9003","Streptomyces","thiazolyl_GetA: GE37468 family thiazolyl peptide","NF033399.1","WP_061921822_9003","Streptomyces bungoensis","8261","9003","42.32","yes","MGNNEEYFVDVNDLSIDVFDVVEQGGAVTALTADHGMPEVGASTNCFCYICCSCSSN","WP_061921822_9003","3.20E-28"
"1142","WP_091094839","WP_091094839_9004","WP_091094839_9004","Micromonospora","thiazolyl_GetA: GE37468 family thiazolyl peptide","NF033399.1","WP_091094839_9004","Micromonospora citrea","12183","9004","15.71","no","MKTSDELDFELDDLPMDVFDLAESGLTIESLTAGHGMPEHGASLPFCSCSATCSCCPSSSS","WP_091094839_9004","2.80E-29"
"1143","WP_027743449","WP_027743449_6","WP_027743449_6","Streptomyces","Ribosomal L32p protein family","PF01783.23","WP_027743449_6","Streptomyces sp. CNT371","7286","6","18.97","yes","MAVPKRKLSRSNTRHRRARWKAARPDLVPVTINGSVHRVPRHLVRAYQRGLLPPPD","WP_027743449_6","3.20E-14"
"1144","WP_085014622","WP_085014622_5","WP_085014622_5","Frankia","Ribosomal L32p protein family","PF01783.23","WP_085014622_5","Frankia sp. KB5","7375","5","27.37","yes","MAVPKRRTSRSNTRHRRAQWKAAAPDLVPVTTPDGRTLRVPRRLVAAYKRGLL","WP_085014622_5","7.70E-17"
"1145","WP_117228579","WP_117228579_2","WP_117228579_2","Verrucosispora","Ribosomal L32p protein family","PF01783.23","WP_117228579_2","Verrucosispora sp. LHW63014","6755","2","8.06","no","MSVPKRRMSRPNTRHRRAQWKASVPRLTPCPCPRREMVVPHRACTHCGLYKGRQVEEQP","WP_117228579_2","9.70E-24"
"1146","WP_035849420","WP_035849420_6","WP_035849420_6","Cryptosporangium","Ribosomal L32p protein family","PF01783.23","WP_035849420_6","Cryptosporangium arvum DSM 44712","7492","6","20.43","yes","MAVPKRKTSRSNTRSRRANWKAQPLQLVPITVDGRTGRVPRRLVRAYQLGILQLD","WP_035849420_6","4.70E-16"
"1147","WP_109186559","WP_109186559_2","WP_109186559_2","Streptomyces","Ribosomal L32p protein family","PF01783.23","WP_109186559_2","Streptomyces sp. CS081A","6389","2","25.01","no","MAVPKRKMSRSNTRHRRARWKAVTPRLAPVTVDGSVYLVPQRLVKAYERGLLRPEG","WP_109186559_2","1.30E-14"
"1148","WP_117228578","WP_117228578_2","WP_117228578_2","Verrucosispora","Ribosomal L32p protein family","PF01783.23","WP_117228578_2","Verrucosispora sp. LHW63014","5367","2","8.06","no","MSVPKRRMSRPNTRHRRAQWKASVPRLTPCPCPRREMVVPHRACTHCGLYKGRQVEEQP","WP_117228578_2","9.70E-24"
"1149","WP_049804670","WP_049804670_1","WP_049804670_1","Microlunatus","none","none","WP_049804670_1","Microlunatus phosphovorus NM-1","2309","1","15.09","yes","MDKKLLRRVSTRTRTGAPVLHSGNHATASAPFAWE","WP_049804670_1","none"
"1150","WP_117228578","WP_117228578_1","WP_117228578_1","Verrucosispora","none","none","WP_117228578_1","Verrucosispora sp. LHW63014","930","1","18.93","yes","MDKKLLRRVSTRTRSGAPVLHSHNHAVAGSPFAWE","WP_117228578_1","none"
"1151","WP_117228580","WP_117228580_1","WP_117228580_1","Verrucosispora","none","none","WP_117228580_1","Verrucosispora sp. LHW63014","3639","1","18.93","yes","MDKKLLRRVSTRTRSGAPVLHSHNHAVAGSPFAWE","WP_117228580_1","none"
"1152","WP_013865884","WP_013865884_1","WP_013865884_1","Microlunatus","none","none","WP_013865884_1","Microlunatus phosphovorus NM-1","3654","1","15.09","yes","MDKKLLRRVSTRTRTGAPVLHSGNHATASAPFAWE","WP_013865884_1","none"
"1153","WP_117228579","WP_117228579_1","WP_117228579_1","Verrucosispora","none","none","WP_117228579_1","Verrucosispora sp. LHW63014","2318","1","18.93","yes","MDKKLLRRVSTRTRSGAPVLHSHNHAVAGSPFAWE","WP_117228579_1","none"
"1154","BAK38069","BAK38069_1","BAK38069_1","Microlunatus","none","none","BAK38069_1","Microlunatus phosphovorus NM-1","2315","1","15.09","yes","MDKKLLRRVSTRTRTGAPVLHSGNHATASAPFAWE","BAK38069_1","none"
"1155","WP_013865882","WP_013865882_1","WP_013865882_1","Microlunatus","none","none","WP_013865882_1","Microlunatus phosphovorus NM-1","898","1","15.09","yes","MDKKLLRRVSTRTRTGAPVLHSGNHATASAPFAWE","WP_013865882_1","none"
"1156","WP_076824657","WP_076824657_2","WP_076824657_2","Frankia","Adenovirus E1B protein N-terminus","PF04623.12","WP_076824657_2","Frankia sp. CcI49","4109","2","8.45","no","MAATARGPGRLGATRPPPTQREITNGLWTSALVPGPCGAATGVATATGSITNGLWTSALVPGPCGAATGAAAATGSTRNSLTTASYL","WP_076824657_2","0.00035"
"1157","WP_124003201","WP_124003201_2","WP_124003201_2","Streptomyces","none","none","WP_124003201_2","Streptomyces sp. Ag82_G5-5","3840","2","3.33","no","MRGRPPREPVTGRAASVTAQAVQANGLWTSALVPGPCGAARDPSASSSSNANGLWTSALVPGPCGAASEPSDLSSSKASDSMRFPFFLKTVVVFKREIRQTLCATARPVRLATM","WP_124003201_2","none"
"1158","WP_091272829","WP_091272829_3","WP_091272829_3","Frankia","Adenovirus E1B protein N-terminus","PF04623.12","WP_091272829_3","Frankia irregularis","4172","3","0.05","no","MAATARGPGRLGATRPPPTQRAITNGLWTSALVPGPCGAATGAATATGSITNGLWTSALVPGPCGAATGAAAATGSTRNSLTTASYL","WP_091272829_3","9.10E-05"
"1159","WP_131626375","WP_131626375_3","WP_131626375_3","Frankia","none","none","WP_131626375_3","Frankia sp. BMG5.11","4131","3","0.44","no","MGATRPPPTQRATTNGLWTSALVPGPWGAVTGATATTGSTTNGLWTSALVPGPWGAVTGASTATGSTRNSLTATSSPVMKTETISVKGTVGAGEDGRNQVGELLSVMIRGCG","WP_131626375_3","none"
"1160","WP_091272827","WP_091272827_3","WP_091272827_3","Frankia","Adenovirus E1B protein N-terminus","PF04623.12","WP_091272827_3","Frankia irregularis","2760","3","0.05","no","MAATARGPGRLGATRPPPTQRAITNGLWTSALVPGPCGAATGAATATGSITNGLWTSALVPGPCGAATGAAAATGSTRNSLTTASYL","WP_091272827_3","9.10E-05"
"1161","RPE52214","RPE52214_2","RPE52214_2","Streptomyces","none","none","RPE52214_2","Streptomyces sp. Ag82_G5-5","2400","2","3.33","no","MRGRPPREPVTGRAASVTAQAVQANGLWTSALVPGPCGAARDPSASSSSNANGLWTSALVPGPCGAASEPSDLSSSKASDSMRFPFFLKTVVVFKREIRQTLCATARPVRLATM","RPE52214_2","none"
"1162","WP_124003633","WP_124003633_2","WP_124003633_2","Streptomyces","none","none","WP_124003633_2","Streptomyces sp. Ag82_G5-5","2406","2","3.33","no","MRGRPPREPVTGRAASVTAQAVQANGLWTSALVPGPCGAARDPSASSSSNANGLWTSALVPGPCGAASEPSDLSSSKASDSMRFPFFLKTVVVFKREIRQTLCATARPVRLATM","WP_124003633_2","none"
"1163","WP_103517755","WP_103517755_2","WP_103517755_2","Streptomyces","none","none","WP_103517755_2","Streptomyces sp. SM10","1890","2","39.7","yes","MALRDVLQSLNDTELVANPAESRLAGEGVIDPERASVLHHDESQDAPMMVMSQINEA","WP_103517755_2","none"
"1164","WP_051386825","WP_051386825_1","WP_051386825_1","Streptomyces","none","none","WP_051386825_1","Streptomyces sp. AW19M42","1868","1","41.33","yes","MALRDVLQSLNDTELVANPAESRLAGEGVIDPERAAVLHHDESQDAPMMVMSQINEA","WP_051386825_1","none"
"1165","WP_054222272","WP_054222272_1","WP_054222272_1","Actinobacteria","none","none","WP_054222272_1","Actinobacteria bacterium OV450","1899","1","54.45","yes","MALRDVLNNLNDTELVANPTEARLAGEGVIDPAKAAVLSNDEAYDAPMMVLSQINEA","WP_054222272_1","none"
"1166","WP_115914639","WP_115914639_1","WP_115914639_1","Streptomyces","none","none","WP_115914639_1","Streptomyces sp. 75","1874","1","44.22","yes","MALRDVFQSLNETDAVASPTETRLAGEGLIDPEKAAVLSNNEEAADAPMTVLSQINEA","WP_115914639_1","none"
"1167","WP_071377378","WP_071377378_1","WP_071377378_1","Streptomyces","none","none","WP_071377378_1","Streptomyces sp. MUSC 14","1876","1","38.64","yes","MALRDVFQSLNETDAVASPAESRLAGEGLLDPEKAAVLNNNEEAADAPMTVLSQINEA","WP_071377378_1","none"
"1168","WP_084415984","WP_084415984_2","WP_084415984_2","Rathayibacter","none","none","WP_084415984_2","Rathayibacter tritici","3703","2","25.46","yes","MGLKDVLSALNDADIVAAPSLARAAGEGGVDPSKVAAYASDEAYDAPMMIMSQINEA","WP_084415984_2","none"
"1169","WP_018550650","WP_018550650_1","WP_018550650_1","Streptomyces","none","none","WP_018550650_1","Streptomyces sp. ATexAB-D23","1891","1","36.11","yes","MALRDVLQSLNDTELVANPAESRLAGEGVIDPERASVLHHDESQDAPMMVMSQINEA","WP_018550650_1","none"
"1170","WP_004004118","WP_004004118_2","WP_004004118_2","Streptomyces","Helix-turn-helix domain","PF12840.7","WP_004004118_2","Streptomyces viridochromogenes Tue57","4717","2","33.0","no","MTTTSPPPSDEPAKDLQAASELLRALASPVRVGIVRELSDGGKYVHELVAALGVSQPLVSQHLRVLRTSRIVTARRQARETQYTLTDDHVAHIVLDAIRHAQE","WP_004004118_2","1.20E-14"
"1171","WP_035849420","WP_035849420_5","WP_035849420_5","Cryptosporangium","Helix-turn-helix domain","PF12840.7","WP_035849420_5","Cryptosporangium arvum DSM 44712","5991","5","32.47","no","MTVGPPPPDGVTQRLQPASDLLRALAAPIRLGIVRELAEGPKPVHALVAALEASQPLVSQHLRILRGAGVVEAHRRAREIEYSLVDDHVAHIVLDAIRHADEVA","WP_035849420_5","9.70E-13"
"1172","WP_035849418","WP_035849418_3","WP_035849418_3","Cryptosporangium","Helix-turn-helix domain","PF12840.7","WP_035849418_3","Cryptosporangium arvum DSM 44712","7304","3","32.47","no","MTVGPPPPDGVTQRLQPASDLLRALAAPIRLGIVRELAEGPKPVHALVAALEASQPLVSQHLRILRGAGVVEAHRRAREIEYSLVDDHVAHIVLDAIRHADEVA","WP_035849418_3","9.70E-13"
"1173","WP_084011357","WP_084011357_4","WP_084011357_4","Frankia","Helix-turn-helix domain","PF12840.7","WP_084011357_4","Frankia sp. DC12","4738","4","22.54","no","MDDGGGDDGPEKAFDAASVLLRALAAPVRLAVIDRLADGPRCVHEIVEAVGVSQSLVSQHLRVLRGAGLVATARRGREVVYRLTDDHVAHIVRDALTHAQEER","WP_084011357_4","1.90E-16"
"1174","WP_045877303","WP_045877303_4","WP_045877303_4","Frankia","Helix-turn-helix domain","PF12840.7","WP_045877303_4","Frankia sp. DC12","3323","4","22.54","no","MDDGGGDDGPEKAFDAASVLLRALAAPVRLAVIDRLADGPRCVHEIVEAVGVSQSLVSQHLRVLRGAGLVATARRGREVVYRLTDDHVAHIVRDALTHAQEER","WP_045877303_4","1.90E-16"
"1175","WP_067284698","WP_067284698_2","WP_067284698_2","Streptomyces","Helix-turn-helix domain","PF12840.7","WP_067284698_2","Streptomyces jeddahensis","4835","2","37.92","no","MATASPSPTDDPASDLQAASDLLRALASPVRLGIVRELSGGGKYVHELVNALGVSQPLVSQHLRVLRTSRIVTARRQARETQYSLTDDHVAHIVLDAIRHAQE","WP_067284698_2","8.60E-15"
"1176","WP_104263679","WP_104263679_2","WP_104263679_2","Rathayibacter","Helix-turn-helix domain","PF12840.7","WP_104263679_2","Rathayibacter iranicus","4256","2","28.57","no","MTEDLEPAAELFKVLSSSSRLRLLRALAEETSTVGRLAEVTGLSQPLVSQHLRMLRTAGLVAVERVGREAHYSVADTHVTHIVNDAVRHALEA","WP_104263679_2","1.20E-15"
"1177","WP_015618321","WP_015618321_1","WP_015618321_1","Actinoplanes","none","none","WP_015618321_1","Actinoplanes sp. N902-109","2173","1","51.4","yes","MADTRNKTSLVAALTVVLCGCLVALIASDDLTSGLRYSLGAAVTAAILVCAYRLGAALRTNR","WP_015618321_1","none"
"1178","WP_057576508","WP_057576508_3","WP_057576508_3","Streptomyces","none","none","WP_057576508_3","Streptomyces sp. Root264","2338","3","39.15","yes","MTASRSRTTFAALLAVLACVEVMLISSDTSDGVRYGVGAALAVGILVVVGRLAKGGSSD","WP_057576508_3","none"
"1179","WP_078909294","WP_078909294_7","WP_078909294_7","Streptomyces","none","none","WP_078909294_7","Streptomyces virginiae","2247","7","42.6","yes","MTVSRTNTTLVALLAVLACVEAVLITSDAADGVRYGVGAALVAAIVVVIARLAKGRSSN","WP_078909294_7","none"
"1180","WP_031012255","WP_031012255_1","WP_031012255_1","Streptomyces","none","none","WP_031012255_1","Streptomyces sp. NRRL F-5727","2267","1","53.92","yes","MSSSTATSSRTLLAALLAALAIAEVVVVTGDASDGVRYGGGAVLAVAILAVVYRLSKGSSAR","WP_031012255_1","none"
"1181","SDN00667","SDN00667_2","SDN00667_2","Lentzea","none","none","SDN00667_2","Lentzea violacea","6849","2","12.22","yes","MDGYGFNIALVGVLVLVNALFAGSELR","SDN00667_2","none"
"1182","WP_107442966","WP_107442966_5","WP_107442966_5","Streptomyces","none","none","WP_107442966_5","Streptomyces sp. P3","2504","5","38.89","yes","MTASRSRTTLAALLAVLACVEVVLISSDTSDSVRYGVGAALAVGILVLVGRLAKGGSSD","WP_107442966_5","none"
"1183","WP_090014707","WP_090014707_2","WP_090014707_2","Lentzea","none","none","WP_090014707_2","Lentzea violacea","6849","2","12.22","yes","MDGYGFNIALVGVLVLVNALFAGSELR","WP_090014707_2","none"
"1184","SEC38602","SEC38602_2","SEC38602_2","Streptomyces","none","none","SEC38602_2","Streptomyces sp. KS_5","90","2","39.78","yes","MDQDQSVDNSLFLDEETTERFSMLVNDEGVMRAGFVAHEANNLNEA","SEC38602_2","none"
"1185","WP_086824496","WP_086824496_1","WP_086824496_1","Allokutzneria","none","none","WP_086824496_1","Allokutzneria sp. NRRL B-24872","13","1","34.27","yes","MGDGQMEQQGFALDQDTTEKFWAMLDEEGTTRAGFILHLDIGGAE","WP_086824496_1","none"
"1186","WP_121394015","WP_121394015_1","WP_121394015_1","Actinokineospora","none","none","WP_121394015_1","Actinokineospora cianjurensis","18","1","21.96","yes","MSGSQQESGYVLDEDTTELFWGMLEDEGVHRAGFVAHMSMCFHEETAAGTSGGQR","WP_121394015_1","none"
"1187","WP_125813086","WP_125813086_2","WP_125813086_2","Streptomyces","none","none","WP_125813086_2","Streptomyces sp. WAC07149","96","2","38.26","yes","MEQEQNVDTSLFLDEETSERFSMLVNDEGVMRAGFVAHQANNLNEA","WP_125813086_2","none"
"1188","WP_126898321","WP_126898321_2","WP_126898321_2","Streptomyces","none","none","WP_126898321_2","Streptomyces sp. WAC 01325","100","2","40.4","yes","MDQDQSIDNSLFLDEETTERFSMLVNDEGVMRAGFVAHEANNLNEA","WP_126898321_2","none"
"1189","WP_092779820","WP_092779820_1","WP_092779820_1","Actinokineospora","none","none","WP_092779820_1","Actinokineospora terrae","18","1","26.55","yes","MSGSQQESGYVLDEDTTELFWGMLEDEGVHRAGFVAHMSMCFHEETAATASGGEG","WP_092779820_1","none"
"1190","WP_030432198","WP_030432198_1","WP_030432198_1","Allokutzneria","none","none","WP_030432198_1","Allokutzneria albata","53","1","25.99","yes","MAAQQPEGFALDQDTTEKFWAMLEEDGVTRAGFVMHMGMNAE","WP_030432198_1","none"
"1191","WP_089157775","WP_089157775_2","WP_089157775_2","Micromonospora","Nitrile hydratase, alpha chain","PF02979.16","WP_089157775_2","Micromonospora sp. NBS 11-29","552","2","48.36","yes","MTPVDRAVFVAAYSRLVADVWADPVRERALESDPREFLAGYGLHLPEDVQVRVVRDVADADPDLQVQVESWELAESTGAFVLFVPSLLPVAETELAEDELDSVVAGLDSSCACCCPCCCT","WP_089157775_2","1.70E-06"
"1192","WP_067306280","WP_067306280_1","WP_067306280_1","Micromonospora","Nitrile hydratase, alpha chain","PF02979.16","WP_067306280_1","Micromonospora rifamycinica","582","1","59.68","yes","MTPVDRAVFVAAYSRLVADVWADPQRERALESDPRTLLAEYGLGLPDEVRVRVVRDAADTDPDLEVQVNSWQQAADTGTFVLFVPALLPVTETELAEDELDSVVAGLDSSCACCCPCCCT","WP_067306280_1","0.0096"
"1193","WP_088972034","WP_088972034_1","WP_088972034_1","Micromonospora","Nitrile hydratase, alpha chain","PF02979.16","WP_088972034_1","Micromonospora siamensis","553","1","60.35","yes","MTPVDRAVFVAAYSRLVADVWADPAREQALGRDPRGFLAGYGLVLPDEVEVRVVREAADADPDLEVQVESWQSASTTGTFLLYVPSLLPVAEAELAEDELDSVVAGLDSSCACCCPCCCT","WP_088972034_1","0.0078"
"1194","WP_088988891","WP_088988891_1","WP_088988891_1","Micromonospora","Nitrile hydratase, alpha chain","PF02979.16","WP_088988891_1","Micromonospora chokoriensis","549","1","47.97","yes","MTPVDRAVFVAAYSRLVAEVWADPVKEQALDRDPRGFLAGYGLELPEDVQVRVVRDVADADPDLEVQVESWESAATTGTFVLFVPSLLPVAQAELAEDELDSVVAGLDSSCACCCPCCCT","WP_088988891_1","0.018"
"1195","WP_120728438","WP_120728438_1","WP_120728438_1","Micromonospora","none","none","WP_120728438_1","Micromonospora endolithica","551","1","44.54","yes","MTPVDRAVFVAAYSRLVADVWADPEKGRALDRNPRDFLARYGLRLPEGVRVRVVRDTGGTDPDLEVQVESWEQAAATGAFVLFVPSLLPLSEAELAEDELDSVVAGLDPSCACCCPCCCT","WP_120728438_1","none"
"1196","WP_046567642","WP_046567642_2","WP_046567642_2","Micromonospora","Nitrile hydratase, alpha chain","PF02979.16","WP_046567642_2","Micromonospora sp. HK10","555","2","56.77","yes","MTPVDRAVFVAAYSRLVADVWADPAREQALDRDPRGFLAGYGLALPEEVQVRVVRDAADVDPDLEVQVESWQSATTTGTFLLYVPSLQPVAEAELAEDELDSVVAGLDSSCACCCPCCCT","WP_046567642_2","0.0078"
"1197","WP_088948967","WP_088948967_1","WP_088948967_1","Micromonospora","none","none","WP_088948967_1","Micromonospora zamorensis","549","1","44.76","yes","MAAYSRLVADVWADPVKEQALDRDPRGFLAGYGLHLSEDVQVRVVRDVADTDPDLEVQVESWQQAGTTGTFVLFVPSLLPVAQAELAEDELDSVVAGLDPSCACCCPCCCT","WP_088948967_1","none"
"1198","WP_114055833","WP_114055833_1","WP_114055833_1","Streptomyces","none","none","WP_114055833_1","Streptomyces globosus","93","1","33.87","yes","MISTVKASAVTAVVHNRAVVHNRAVVHNRAVVHNRTVAK","WP_114055833_1","none"
"1199","WP_086845754","WP_086845754_2","WP_086845754_2","Amycolatopsis","Bacterial transferase hexapeptide (six repeats)","PF00132.24","WP_086845754_2","Amycolatopsis kentuckyensis","88","2","30.11","yes","MISTFERPSAVVVHNRAVVHNRAVVHNRAVVHNRAVVHNRASAK","WP_086845754_2","1.30E-07"
"1200","TDU80263","TDU80263_1","TDU80263_1","Streptomyces","none","none","TDU80263_1","Streptomyces sp. KS 21","80","1","26.3","yes","MISTVKTNVICAVVHNRAVVHNRAVVHNRAVVHNRSVAK","TDU80263_1","none"
"1201","WP_125541988","WP_125541988_1","WP_125541988_1","Streptomyces","none","none","WP_125541988_1","Streptomyces sp. WAC05292","93","1","33.87","yes","MISTVKASAVTAVVHNRAVVHNRAVVHNRAVVHNRTVAK","WP_125541988_1","none"
"1202","WP_103491678","WP_103491678_3","WP_103491678_3","Streptomyces","none","none","WP_103491678_3","Streptomyces sp. SM18","119","3","26.63","yes","MISAVKTNVVCAVVHNRAVVHNRAVVHNRAVVHNRSVTK","WP_103491678_3","none"
"1203","WP_053787331","WP_053787331_1","WP_053787331_1","Streptomyces","none","none","WP_053787331_1","Streptomyces sp. XY332","93","1","26.3","yes","MISTVKTNVICAVVHNRAVVHNRAVVHNRAVVHNRSVAK","WP_053787331_1","none"
"1204","WP_030633187","WP_030633187_2","WP_030633187_2","Streptomyces","none","none","WP_030633187_2","Streptomyces halstedii","119","2","30.87","yes","MISAVKTNVVCAVVHNRAVVHNRAVVHNRAVVHNRSVTK","WP_030633187_2","none"
"1205","WP_078564093","WP_078564093_2","WP_078564093_2","Streptomyces","none","none","WP_078564093_2","Streptomyces sp. CNQ329","766","2","30.82","yes","MNAAELIEGYTAYATPEDLSAAEIAEAGNAIPITTMNMAHTTQITTFVAD","WP_078564093_2","none"
"1206","WP_078572841","WP_078572841_2","WP_078572841_2","Streptomyces","none","none","WP_078572841_2","Streptomyces sp. CNZ288","939","2","29.26","yes","MNAAELIEGYTAYAAPEDFSSAEIADAGNAVPITTMNMAHTTQITTFVAD","WP_078572841_2","none"
"1207","PJJ39560","PJJ39560_2","PJJ39560_2","Streptomyces","none","none","PJJ39560_2","Streptomyces sp. CNZ306","1035","2","29.22","yes","MNAAELIEGYTAYASPEDFSSAEIADAGNAVPITTMNMAHTTQITTFVAD","PJJ39560_2","none"
"1208","WP_100302786","WP_100302786_2","WP_100302786_2","Streptomyces","none","none","WP_100302786_2","Streptomyces sp. CNZ306","996","2","29.22","yes","MNAAELIEGYTAYASPEDFSSAEIADAGNAVPITTMNMAHTTQITTFVAD","WP_100302786_2","none"
"1209","WP_052770273","WP_052770273_1","WP_052770273_1","Streptomyces","none","none","WP_052770273_1","Streptomyces sp. CNQ-509","1036","1","32.09","yes","MNAAELIEGYAAYATPEDLSAAEITDSGNAVPITTMNMAHTTQITTFVAD","WP_052770273_1","none"
"1210","AKH86621","AKH86621_1","AKH86621_1","Streptomyces","none","none","AKH86621_1","Streptomyces sp. CNQ-509","1183","1","32.09","yes","MNAAELIEGYAAYATPEDLSAAEITDSGNAVPITTMNMAHTTQITTFVAD","AKH86621_1","none"
"1211","RZU94771","RZU94771_2","RZU94771_2","Streptomyces","none","none","RZU94771_2","Streptomyces sp. CNZ288","1062","2","29.26","yes","MNAAELIEGYTAYAAPEDFSSAEIADAGNAVPITTMNMAHTTQITTFVAD","RZU94771_2","none"
"1212","ACZ89043","ACZ89043_1","ACZ89043_1","Streptosporangium","Protein of unknown function, DUF485","PF04341.12","ACZ89043_1","Streptosporangium roseum DSM 43021","4160","1","66.04","yes","MTARQHDSSVYEHIQGEERFQELKRRFRSWAFPMTAAFLAWYLLYVVLSAWARDFMGTKVFGNINVALIFGLLQFVSTFLIAWAYSRYAEKKLDPVADEIRHEAEGTTE","ACZ89043_1","3.10E-37"
"1213","WP_086572205","WP_086572205_1","WP_086572205_1","Streptosporangium","Protein of unknown function, DUF485","PF04341.12","WP_086572205_1","Streptosporangium minutum","5600","1","71.57","yes","MTTRQHDSSVYEHIQGEERFQELKRRFRSWAFPMTAAFLAWYLLYVVLSAWARDFMGTKVFGNINVALIFGLLQFVSTFLIAWAYSRYAEKKLDPVADEIRHEAEGTTE","WP_086572205_1","3.10E-37"
"1214","KLO64220","KLO64220_1","KLO64220_1","Dermacoccus","Protein of unknown function, DUF485","PF04341.12","KLO64220_1","Dermacoccus sp. PE3","4267","1","42.52","yes","MVDKPVDHDAAARRYLAVQQSAEFQDLRTTFRKFVFPVTAFFLVWYFVYVLLSIFAPGFMGTKVFGNINIGLLMGLGQFVTTFAITLAYSRWAGRELDPRADAVGARLDGEASH","KLO64220_1","9.20E-38"
"1215","WP_081937495","WP_081937495_1","WP_081937495_1","Streptosporangium","Protein of unknown function, DUF485","PF04341.12","WP_081937495_1","Streptosporangium roseum","7019","1","71.62","yes","MTTRQHDSSVYEHIQGEERFQELKRRFRSWAFPMTAAFLAWYLLYVVLSAWARDFMGTKVFGNINVALIFGLLQFVSTFLIAWAYSRYAEKKLDPVADEIRHEAEGTTE","WP_081937495_1","3.10E-37"
"1216","SFI84698","SFI84698_1","SFI84698_1","Streptosporangium","Protein of unknown function, DUF485","PF04341.12","SFI84698_1","Streptosporangium canum","5094","1","72.65","yes","MTTRQHDSSVYEHIQGEERFQELKRRFRSWAFPMTAAFLAWYLLYVVLSAWARDFMGTKVFGNINVALIFGLLQFVSTFLIAWAYSRYAEKKLDPVADEIRHEAEGTTE","SFI84698_1","3.10E-37"
"1217","WP_081453250","WP_081453250_1","WP_081453250_1","Streptosporangium","Protein of unknown function, DUF485","PF04341.12","WP_081453250_1","Streptosporangium roseum DSM 43021","4160","1","66.04","yes","MTARQHDSSVYEHIQGEERFQELKRRFRSWAFPMTAAFLAWYLLYVVLSAWARDFMGTKVFGNINVALIFGLLQFVSTFLIAWAYSRYAEKKLDPVADEIRHEAEGTTE","WP_081453250_1","3.10E-37"
"1218","WP_093886633","WP_093886633_1","WP_093886633_1","Streptosporangium","Protein of unknown function, DUF485","PF04341.12","WP_093886633_1","Streptosporangium canum","5094","1","72.65","yes","MTTRQHDSSVYEHIQGEERFQELKRRFRSWAFPMTAAFLAWYLLYVVLSAWARDFMGTKVFGNINVALIFGLLQFVSTFLIAWAYSRYAEKKLDPVADEIRHEAEGTTE","WP_093886633_1","3.10E-37"
"1219","OMO45941","OMO45941_3","OMO45941_3","Corynebacterium","Arc-like DNA binding domain","PF03869.14","OMO45941_3","Corynebacterium diphtheriae","4116","3","3.45","yes","MPRKNIPLRIDPAVADAISRWAQDETRSVNSQIEMMLREQLRRAGRLPKNVGEISKPGRPAKKHQ","OMO45941_3","3.50E-07"
"1220","WP_088264775","WP_088264775_2","WP_088264775_2","Corynebacterium","Arc-like DNA binding domain","PF03869.14","WP_088264775_2","Corynebacterium diphtheriae bv. mitis","3314","2","4.19","yes","MPRKNIPLRIDPAVADAISRWAQDETRSVNSQIEMMLREQLRRAGRLPKNVGEISKPGRPAKKHQ","WP_088264775_2","3.50E-07"
"1221","PKB45316","PKB45316_2","PKB45316_2","Kitasatospora","HicB family","PF05534.12","PKB45316_2","Kitasatospora sp. OK780","5206","2","33.51","yes","MATERKKILLRLDPAVHDALARWASDELRSTNAQIEFLLRRALTDSGRMPGGVGRLPRRGRPTSGENPDRAPDPEG","PKB45316_2","2.20E-06"
"1222","WP_053587900","WP_053587900_2","WP_053587900_2","Actinomyces","Protein of unknown function (DUF2840)","PF11000.8","WP_053587900_2","Actinomyces sp. oral taxon 414","637","2","34.39","yes","MADRRRKQVLLRLDPAVHAAIAKWAADDLRSVNSQIEIILRRALADAGRGVRAAPMRGRGRPRKDSGEAREEG","WP_053587900_2","2.00E-06"
"1223","WP_088261769","WP_088261769_1","WP_088261769_1","Corynebacterium","Arc-like DNA binding domain","PF03869.14","WP_088261769_1","Corynebacterium diphtheriae bv. intermedius","3141","1","9.07","yes","MPRKNIPLRIDPAVADAISRWAQDETRSVNSQIEMMLREQLRRAGRLPKNVGEISKPGRPAKKHQ","WP_088261769_1","3.50E-07"
"1224","WP_100886407","WP_100886407_2","WP_100886407_2","Kitasatospora","HicB family","PF05534.12","WP_100886407_2","Kitasatospora sp. OK780","5206","2","33.51","yes","MATERKKILLRLDPAVHDALARWASDELRSTNAQIEFLLRRALTDSGRMPGGVGRLPRRGRPTSGENPDRAPDPEG","WP_100886407_2","2.20E-06"
"1225","WP_088246551","WP_088246551_2","WP_088246551_2","Corynebacterium","Arc-like DNA binding domain","PF03869.14","WP_088246551_2","Corynebacterium diphtheriae bv. gravis","4117","2","8.89","yes","MPRKNIPLRIDPAVADAISRWAQDETRSVNSQIEMMLREQLRRAGRLPKNIGEISKPGRPAKKHQ","WP_088246551_2","3.60E-07"
"1226","WP_053729790","WP_053729790_2","WP_053729790_2","Streptomyces","none","none","WP_053729790_2","Streptomyces sp. WM6378","1842","2","33.61","yes","METIREAFTANSDEALLDAAGLDEHFEVETLSPMVIENIDFA","WP_053729790_2","none"
"1227","WP_100584684","WP_100584684_1","WP_100584684_1","Kitasatospora","none","none","WP_100584684_1","Kitasatospora sp. CB02891","3754","1","40.71","yes","MSINDKLAATNEEVIIAEAEAEIEELSKHDRPMVVGVINEA","WP_100584684_1","none"
"1228","WP_053729792","WP_053729792_2","WP_053729792_2","Streptomyces","none","none","WP_053729792_2","Streptomyces sp. WM6378","4390","2","33.61","yes","METIREAFTANSDEALLDAAGLDEHFEVETLSPMVIENIDFA","WP_053729792_2","none"
"1229","RPF24868","RPF24868_2","RPF24868_2","Streptomyces","none","none","RPF24868_2","Streptomyces sp. TLI_185","3850","2","31.05","yes","MSLDDKLQATDDESLLEAADAEVEELSNQARPMLISEINEA","RPF24868_2","none"
"1230","WP_100886407","WP_100886407_1","WP_100886407_1","Kitasatospora","none","none","WP_100886407_1","Kitasatospora sp. OK780","1319","1","41.67","yes","MSIDTLIKPTEDELRAAAIDELDEFDGDAPMLIENIDFA","WP_100886407_1","none"
"1231","PKB45316","PKB45316_1","PKB45316_1","Kitasatospora","none","none","PKB45316_1","Kitasatospora sp. OK780","1913","1","41.67","yes","MSIDTLIKPTEDELRAAAIDELDEFDGDAPMLIENIDFA","PKB45316_1","none"
"1232","AKJ15899","AKJ15899_3","AKJ15899_3","Streptomyces","none","none","AKJ15899_3","Streptomyces incarnatus","3941","3","31.68","yes","MSLNDKLKATDDEALLQAADAEVEELSNQSRPMLISEINEA","AKJ15899_3","none"
"1233","WP_123971014","WP_123971014_2","WP_123971014_2","Streptomyces","none","none","WP_123971014_2","Streptomyces sp. TLI_185","3784","2","31.05","yes","MSLDDKLQATDDESLLEAADAEVEELSNQARPMLISEINEA","WP_123971014_2","none"
"1234","WP_085014622","WP_085014622_4","WP_085014622_4","Frankia","Ribosomal L28 family","PF00830.19","WP_085014622_4","Frankia sp. KB5","4671","4","27.6","no","MSAHCQVTGRKPGFGMRVSHSHVRTRRRWNPNIQKKTYRLPSENRKVTLTLSTKGIKTVDKLGIEAVVRRLXSQGVKV","WP_085014622_4","5.30E-27"
"1235","WP_093766414","WP_093766414_3","WP_093766414_3","Streptomyces","Ribosomal L28 family","PF00830.19","WP_093766414_3","Streptomyces sp. F-7","6487","3","33.36","yes","MSAHCQLTGARPRFGNTVSHSHRRTSRRFDPNIQRKRYWLPSEGRYVRLTLSAKAIKTVDSIGVEAAVARIRARGGKI","WP_093766414_3","1.40E-28"
"1236","WP_093655900","WP_093655900_4","WP_093655900_4","Streptomyces","Ribosomal L28 family","PF00830.19","WP_093655900_4","Streptomyces radiopugnans","6835","4","39.21","yes","MTGRSSLRAMALVYDNGFHYRKGSRPHRQEGTPLSAHCQLTGAKPGFGKNISHSHRRTSRRFDPNIQRKRYWLPSEGRHVRLTLSTKGIKTVDAIGIEAAVARIRARGGKV","WP_093655900_4","9.40E-28"
"1237","WP_027743449","WP_027743449_3","WP_027743449_3","Streptomyces","Ribosomal L28 family","PF00830.19","WP_027743449_3","Streptomyces sp. CNT371","5225","3","32.52","no","MSARCQMTGRTPGFGNNISHSHRRTRRRFDPNIQRKRYWLPSERRYVRLTLSAKGIKSVDAMGIERAVARMRARGEKI","WP_027743449_3","1.20E-27"
"1238","WP_064110435","WP_064110435_5","WP_064110435_5","Leifsonia","Ribosomal L28 family","PF00830.19","WP_064110435_5","Leifsonia xyli","4502","5","39.31","yes","MAAVCQVTGAVPGFGHNISHSHRRTKRRFDPNIQKKTYYVPSLRRNVTLTLSAKGIKVIDARGIESVVKDLLARGEKI","WP_064110435_5","1.20E-26"
"1239","WP_090039557","WP_090039557_5","WP_090039557_5","Leifsonia","Ribosomal L28 family","PF00830.19","WP_090039557_5","Leifsonia sp. CL147","4517","5","35.3","yes","MAAVCQVTGAVPGFGHNISHSHRRTKRRFDPNIQKKTYYVPSLRRNVTLTLSAKGIKVIDARGIESVVKDLLARGEKI","WP_090039557_5","1.20E-26"
"1240","WP_085014620","WP_085014620_3","WP_085014620_3","Frankia","Ribosomal L28 family","PF00830.19","WP_085014620_3","Frankia sp. KB5","6133","3","27.6","no","MSAHCQVTGRKPGFGMRVSHSHVRTRRRWNPNIQKKTYRLPSENRKVTLTLSTKGIKTVDKLGIEAVVRRLXSQGVKV","WP_085014620_3","5.30E-27"
"1241","WP_093849541","WP_093849541_3","WP_093849541_3","Streptomyces","Ribosomal L28 family","PF00830.19","WP_093849541_3","Streptomyces pini","6786","3","40.77","yes","MTGRSSLRAMALVYDNGFHYRKGSRPHRREGTPLSAHCQLTGAEPGFGNNISHSHRRTPRRFDPNIQRKRYWLPGEGRHVRLTLSAKGIKTIDAIGIEAAVARIRARGGKV","WP_093849541_3","1.70E-27"
"1242","WP_131785729","WP_131785729_1","WP_131785729_1","Frankia","none","none","WP_131785729_1","Frankia symbiont of Coriaria ruscifolia","2546","1","36.01","yes","MTTATAHSPHHSVTEHSHEAGCGHVAVPHGDHVDYVHDAHLHRSHGDHYDECETAGHTECGGHTHAHGDGCGHVAVPHGDHVDYLHDGHRHAAHDGHWDDH","WP_131785729_1","none"
"1243","WP_004004118","WP_004004118_1","WP_004004118_1","Streptomyces","none","none","WP_004004118_1","Streptomyces viridochromogenes Tue57","5106","1","49.87","no","MSTATEHRTHEDHAHTHGADCGHVAIPHGGHTDYAHDGHIHRLHDGHVDECAASGHTVHEGHDHQHGEGCGHVAVPHGDHTDYVHDGHRHAAHDGHWDDH","WP_004004118_1","none"
"1244","WP_035849420","WP_035849420_4","WP_035849420_4","Cryptosporangium","none","none","WP_035849420_4","Cryptosporangium arvum DSM 44712","6362","4","43.37","no","MTTPVAHKPHTEHDHQHGDTCGHTAFAHEDHTDYAHDGHVHRVHEDHVDECEPVAHRVHAEHAHEHGTDCGHPAVSHGDHTDYVHDGHRHAPHDGHWDDH","WP_035849420_4","none"
"1245","WP_035849418","WP_035849418_2","WP_035849418_2","Cryptosporangium","none","none","WP_035849418_2","Cryptosporangium arvum DSM 44712","7675","2","43.37","no","MTTPVAHKPHTEHDHQHGDTCGHTAFAHEDHTDYAHDGHVHRVHEDHVDECEPVAHRVHAEHAHEHGTDCGHPAVSHGDHTDYVHDGHRHAPHDGHWDDH","WP_035849418_2","none"
"1246","WP_045877303","WP_045877303_2","WP_045877303_2","Frankia","none","none","WP_045877303_2","Frankia sp. DC12","3631","2","39.13","no","MTTTTHREHHSSADHAHAPGCGHIAVPHGDHVDYAHDGCLHRAHDGHYDDCEAAGHTEHTAHEHVHGDGCGHVAVPHRDHVDYVHDGHRHARHDGHWDDH","WP_045877303_2","none"
"1247","WP_131785730","WP_131785730_1","WP_131785730_1","Frankia","none","none","WP_131785730_1","Frankia symbiont of Coriaria ruscifolia","1199","1","36.01","yes","MTTATAHSPHHSVTEHSHEAGCGHVAVPHGDHVDYVHDAHLHRSHGDHYDECETAGHTECGGHTHAHGDGCGHVAVPHGDHVDYLHDGHRHAAHDGHWDDH","WP_131785730_1","none"
"1248","WP_084011357","WP_084011357_2","WP_084011357_2","Frankia","none","none","WP_084011357_2","Frankia sp. DC12","5046","2","39.13","no","MTTTTHREHHSSADHAHAPGCGHIAVPHGDHVDYAHDGCLHRAHDGHYDDCEAAGHTEHTAHEHVHGDGCGHVAVPHRDHVDYVHDGHRHARHDGHWDDH","WP_084011357_2","none"
"1249","WP_067284698","WP_067284698_1","WP_067284698_1","Streptomyces","none","none","WP_067284698_1","Streptomyces jeddahensis","5229","1","55.37","no","MATATDHRTHEDHTHTHGEGCGHVAIPHGDHTDYAHDGHIHRAHEDHVDECSVGEHAVHDGHDHQHGEGCGHVAIPHEDHTDYVHDGHRHAAHDGHWDDH","WP_067284698_1","none"
"1250","WP_061787443","WP_061787443_2","WP_061787443_2","Pseudopropionibacterium","Helix-turn-helix domain","PF12840.7","WP_061787443_2","Pseudopropionibacterium propionicum","3566","2","45.69","no","MAREVFHPDVADISLDAVLGALSDPIRRDVLRRIAEEGPLYCGDLAYNVVKSTLSHHLRTLRLSGLMHTEVLGKRRRVTRRDHAIEQRFPGLLKAVGLPPGKGCWEEQEIARPGAVR","WP_061787443_2","4.50E-15"
"1251","WP_089950617","WP_089950617_1","WP_089950617_1","Lechevalieria","Helix-turn-helix domain","PF12840.7","WP_089950617_1","Lechevalieria xinjiangensis","5220","1","42.81","no","MAGRNLVGPEADALELGVVLRALADEHRRSVMTELAADRTDSERGCNSFALPISKQTQTHHFRVLREAGLITEIDYGNRKGIRLRRTDVESRFPGLLALLEAEHRNSTAPR","WP_089950617_1","2.90E-10"
"1252","WP_066215709","WP_066215709_1","WP_066215709_1","Arthrobacter","Helix-turn-helix domain","PF12840.7","WP_066215709_1","Arthrobacter woluwensis","5747","1","57.56","yes","MADAEGHPETAEIELGQVLSALSDPLRRQVIHDLLHSEPGIERTCTSFGLPVTKSTRTHHFRVLREAGLVRQVDRGNMRGVTLRREDIEERFPGLLNLIAQDDA","WP_066215709_1","1.10E-12"
"1253","WP_109280137","WP_109280137_1","WP_109280137_1","Streptomyces","Helix-turn-helix domain","PF12840.7","WP_109280137_1","Streptomyces orinoci","4345","1","52.19","yes","MAEESCHRVAPVHTHPEQVPVRTALAALADPVRLLIVRELAGSPDWTRACGSFRVPVRKAALSHHFQVLRSAGLVEQRDEGAKRLNRLRREEFEARFPGLLDLVLREDD","WP_109280137_1","2.20E-12"
"1254","WP_052852666","WP_052852666_1","WP_052852666_1","Streptomyces","Helix-turn-helix domain","PF12840.7","WP_052852666_1","Streptomyces avicenniae","5587","1","76.8","yes","MPDTEGHPSVGEIDFQSVLKALSDPLRYHVIATLAREPDGTERTCTSFGLPVTKSTRTHHFRVLREAGLVRQVDRGNSRGARLRREDIDRRFPGLLALIADNEQPPGTAGLPAA","WP_052852666_1","2.00E-12"
"1255","WP_109280200","WP_109280200_1","WP_109280200_1","Streptomyces","Helix-turn-helix domain","PF12840.7","WP_109280200_1","Streptomyces orinoci","5333","1","52.19","yes","MAEESCHRVAPVHTHPEQVPVRTALAALADPVRLLIVRELAGSPDWTRACGSFRVPVRKAALSHHFQVLRSAGLVEQRDEGAKRLNRLRREEFEARFPGLLDLVLREDD","WP_109280200_1","2.20E-12"
"1256","SEQ53933","SEQ53933_1","SEQ53933_1","Lechevalieria","Helix-turn-helix domain","PF12840.7","SEQ53933_1","Lechevalieria xinjiangensis","5220","1","42.81","no","MAGRNLVGPEADALELGVVLRALADEHRRSVMTELAADRTDSERGCNSFALPISKQTQTHHFRVLREAGLITEIDYGNRKGIRLRRTDVESRFPGLLALLEAEHRNSTAPR","SEQ53933_1","2.90E-10"
"1257","SEC29390","SEC29390_1","SEC29390_1","Arthrobacter","Helix-turn-helix domain","PF12840.7","SEC29390_1","Arthrobacter woluwensis","5747","1","57.56","yes","MADAEGHPETAEIELGQVLSALSDPLRRQVIHDLLHSEPGIERTCTSFGLPVTKSTRTHHFRVLREAGLVRQVDRGNMRGVTLRREDIEERFPGLLNLIAQDDA","SEC29390_1","1.10E-12"
"1258","BAG17422","BAG17422_1","BAG17422_1","Streptomyces","none","none","BAG17422_1","Streptomyces griseus subsp. griseus NBRC 13350","60","1","22.09","yes","MLDADPTPRETVDLVVGDADESWEDLVRGLIEGPVDPSRILTDCGGNGCNCAGCVGCGLNCMSGGWKCATCGSACC","BAG17422_1","none"
"1259","WP_055559179","WP_055559179_2","WP_055559179_2","Streptomyces","none","none","WP_055559179_2","Streptomyces luridiscabiei","123","2","15.52","yes","MLDIDPTPGGAVDLVVGDADESWEDLVRDLIAGPADPSRILTDCGGNGCTCMSGGNWRCASGSGNGCC","WP_055559179_2","none"
"1260","WP_106731546","WP_106731546_1","WP_106731546_1","Streptomyces","none","none","WP_106731546_1","Streptomyces griseus subsp. griseus","125","1","21.07","yes","MLDADPTPRETVDLVVGDADESWEDLVRGLIEGPADPSRILTDCGGNGCNCAGCVGCGLNCMSGGWKCATCGSACC","WP_106731546_1","none"
"1261","KOG82578","KOG82578_4","KOG82578_4","Streptomyces","none","none","KOG82578_4","Streptomyces griseus subsp. rhodochrous","287","4","14.85","yes","MLDTDPTPGGAVDLVVGDADESWEDLVRDLIAGPADPSRILTDCGGNGCNCAGCVGCGLNCMSGGWKCATCGSACC","KOG82578_4","none"
"1262","SDE31545","SDE31545_2","SDE31545_2","Streptomyces","none","none","SDE31545_2","Streptomyces sp. LaPpAH-199","128","2","20.49","yes","MLDTDPTPGGAVDLVVGDADESWEDLVRDLIAGPADPSRILTDCGGNGCNCAGCVGCGLNCMSGGWKCATCGSACC","SDE31545_2","none"
"1263","KOU46944","KOU46944_3","KOU46944_3","Streptomyces","none","none","KOU46944_3","Streptomyces sp. MMG1522","305","3","14.85","yes","MLDTDPTPGGAVDLVVGDADESWEDLVRDLIAGPADPSRILTDCGGNGCNCAGCVGCGLNCMSGGWKCATCGSACC","KOU46944_3","none"
"1264","WP_083191919","WP_083191919_3","WP_083191919_3","Streptomyces","none","none","WP_083191919_3","Streptomyces violaceoruber","122","3","14.85","yes","MLDTDPTPGGAVDLVVGDADESWEDLVRDLIAGPADPSRILTDCGGNGCNCAGCVGCGLNCMSGGWKCATCGSACC","WP_083191919_3","none"
"1265","WP_052295615","WP_052295615_1","WP_052295615_1","Streptomyces","none","none","WP_052295615_1","Streptomyces griseus","107","1","22.09","yes","MLDADPTPRETVDLVVGDADESWEDLVRGLIEGPVDPSRILTDCGGNGCNCAGCVGCGLNCMSGGWKCATCGSACC","WP_052295615_1","none"
"1266","WP_090047429","WP_090047429_4","WP_090047429_4","Lechevalieria","thiazolyl_GetA: GE37468 family thiazolyl peptide","NF033399.1","WP_090047429_4","Lechevalieria fradiae","4877","4","16.82","yes","MKDLSFDLDDLELGELAVTSMRDSVALPESGASGAPSSCSCGSSSCSSCTQPQLPPA","WP_090047429_4","4.40E-07"
"1267","WP_089952439","WP_089952439_2","WP_089952439_2","Lechevalieria","thiazolyl_GetA: GE37468 family thiazolyl peptide","NF033399.1","WP_089952439_2","Lechevalieria xinjiangensis","5187","2","20.49","yes","MKDLSFDLDDLELGDLAVTTMRDSVALPESGASGAPSSCSCGSSSCSSCHQPQLPTLPA","WP_089952439_2","1.00E-06"
"1268","SER15522","SER15522_2","SER15522_2","Lechevalieria","thiazolyl_GetA: GE37468 family thiazolyl peptide","NF033399.1","SER15522_2","Lechevalieria xinjiangensis","5322","2","20.49","yes","MKDLSFDLDDLELGDLAVTTMRDSVALPESGASGAPSSCSCGSSSCSSCHQPQLPTLPA","SER15522_2","1.00E-06"
"1269","WP_109636347","WP_109636347_1","WP_109636347_1","Lechevalieria","thiazolyl_GetA: GE37468 family thiazolyl peptide","NF033399.1","WP_109636347_1","Lechevalieria deserti","4542","1","10.59","yes","MKDLSFDLDDLELGDLAVTSMRDSVALPESGASGGPSSCSCSSGSCSSCHQPQLPALTA","WP_109636347_1","4.70E-07"
"1270","PWK88358","PWK88358_1","PWK88358_1","Lechevalieria","thiazolyl_GetA: GE37468 family thiazolyl peptide","NF033399.1","PWK88358_1","Lechevalieria deserti","4854","1","10.59","yes","MKDLSFDLDDLELGDLAVTSMRDSVALPESGASGGPSSCSCSSGSCSSCHQPQLPALTA","PWK88358_1","4.70E-07"
"1271","SMC91639","SMC91639_2","SMC91639_2","Lentzea","thiazolyl_GetA: GE37468 family thiazolyl peptide","NF033399.1","SMC91639_2","Lentzea albidocapillata","4968","2","11.04","yes","MKDLSFDPDDLELGDLAVTSLRDSVALPESGASGGASSCSCGSSSCSSCTQPPQLPAQNA","SMC91639_2","2.80E-07"
"1272","WP_090064781","WP_090064781_1","WP_090064781_1","Lentzea","thiazolyl_GetA: GE37468 family thiazolyl peptide","NF033399.1","WP_090064781_1","Lentzea flaviverrucosa","4841","1","6.96","yes","MKDLSFDPDDLELGDLAVTSLRDSVALPESGASGGASSCSCGSSSCSSCTQPPVQNA","WP_090064781_1","1.60E-07"
"1273","WP_093590338","WP_093590338_1","WP_093590338_1","Lentzea","thiazolyl_GetA: GE37468 family thiazolyl peptide","NF033399.1","WP_093590338_1","Lentzea waywayandensis","5078","1","16.6","yes","MKDLSFDPDDLELGDLAVTSLRDSVALPESGASGGASSCSCGSSSCSSCTQPPVQNA","WP_093590338_1","1.60E-07"
"1274","WP_090003614","WP_090003614_1","WP_090003614_1","Lentzea","thiazolyl_GetA: GE37468 family thiazolyl peptide","NF033399.1","WP_090003614_1","Lentzea violacea","4824","1","13.26","yes","MKDLSFDPDDLELGDLAVTSLRDSVALPESGASGGASSCSCGSSSCSSCTQPPVQTA","WP_090003614_1","1.60E-07"
"1275","WP_073785992","WP_073785992_4","WP_073785992_4","Streptomyces","none","none","WP_073785992_4","Streptomyces uncialis","89","4","25.38","yes","MGGFQDRVKFHPDEVVLAPAEEQTLAELADQCQGQVNESADES","WP_073785992_4","none"
"1276","WP_121006702","WP_121006702_1","WP_121006702_1","Saccharothrix","none","none","WP_121006702_1","Saccharothrix australiensis","129","1","23.76","yes","MGFYRDWRWDDDSAEVSLTVEEQQALAELEEQGPVVAR","WP_121006702_1","none"
"1277","EIF94124","EIF94124_2","EIF94124_2","Streptomyces","none","none","EIF94124_2","Streptomyces tsukubensis NRRL18488","91","2","30.27","yes","MGGFQDRDKFHPDEVVLTPTEQQTLAELTDQDVAVESADES","EIF94124_2","none"
"1278","KJY27974","KJY27974_1","KJY27974_1","Streptomyces","none","none","KJY27974_1","Streptomyces sp. NRRL S-495","324","1","32.51","yes","MGGFQDRDKFHPDEVVLSAAEQGLIAELAGLGAESAESTDED","KJY27974_1","none"
"1279","KOV37396","KOV37396_2","KOV37396_2","Streptomyces","none","none","KOV37396_2","Streptomyces sp. XY431","278","2","32.51","yes","MGGFQDRDKFHPDEVVLSAAEQGLIAELAGLGAESAESTDED","KOV37396_2","none"
"1280","OKH95170","OKH95170_4","OKH95170_4","Streptomyces","none","none","OKH95170_4","Streptomyces uncialis","212","4","25.38","yes","MGGFQDRVKFHPDEVVLAPAEEQTLAELADQCQGQVNESADES","OKH95170_4","none"
"1281","WP_051771079","WP_051771079_1","WP_051771079_1","Streptomyces","none","none","WP_051771079_1","Streptomyces sp. NRRL F-6131","98","1","35.69","yes","MGGFQDRDKFHPDEVVLSVAEQRVIAELAKDGQSDSGESGDEG","WP_051771079_1","none"
"1282","WP_078902009","WP_078902009_1","WP_078902009_1","Streptomyces","none","none","WP_078902009_1","Streptomyces tsukubensis","20","1","30.27","yes","MGGFQDRDKFHPDEVVLTPTEQQTLAELTDQDVAVESADES","WP_078902009_1","none"
"1283","WP_062703680","WP_062703680_1","WP_062703680_1","Streptomyces","none","none","WP_062703680_1","Streptomyces regalis","83","1","19.36","yes","MGFYEMYLSIKPDSDAELTATEEQTLEELGLQQG","WP_062703680_1","none"
"1284","WP_030462613","WP_030462613_2","WP_030462613_2","Kitasatospora","none","none","WP_030462613_2","Kitasatospora sp. NRRL B-11411","1325","2","41.9","yes","MPEQVKQQEEWHDVLSAAEELTKDDFEALFGHVPLVITDSEVVDC","WP_030462613_2","none"
"1285","WP_037881970","WP_037881970_3","WP_037881970_3","Streptomyces","none","none","WP_037881970_3","Streptomyces sp. NRRL S-378","1361","3","22.8","yes","MAEVIVETTSDVEELTGEDFEGLFDDSPLIITDSEVRN","WP_037881970_3","none"
"1286","WP_088799351","WP_088799351_2","WP_088799351_2","Streptomyces","none","none","WP_088799351_2","Streptomyces sp. 2112.5","1459","2","24.12","yes","MLDQLQKPLEATTEDIDSIVAARELTREDFDALFADESRIATAWEVVDPS","WP_088799351_2","none"
"1287","WP_088799362","WP_088799362_4","WP_088799362_4","Streptomyces","none","none","WP_088799362_4","Streptomyces sp. 2112.5","7643","4","24.12","yes","MLDQLQKPLEATTEDIDSIVAARELTREDFDALFADESRIATAWEVVDPS","WP_088799362_4","none"
"1288","WP_088799362","WP_088799362_3","WP_088799362_3","Streptomyces","none","none","WP_088799362_3","Streptomyces sp. 2112.5","1400","3","25.66","yes","MAEVILDTASDVAELSGEDFEGLFADAPLVITDSEVRD","WP_088799362_3","none"
"1289","WP_067603246","WP_067603246_1","WP_067603246_1","Nocardiopsis","none","none","WP_067603246_1","Nocardiopsis listeri NBRC 13360","1387","1","30.32","yes","MSEQAKTEERSDVVSAAEELTKDDFEALFGDMPLVITDSEIVDC","WP_067603246_1","none"
"1290","WP_053747924","WP_053747924_3","WP_053747924_3","Streptomyces","none","none","WP_053747924_3","Streptomyces sp. MMG1533","1463","3","28.62","yes","MAEVIVETASDVEELTGEDFEGLFADSPLIITDSEVRD","WP_053747924_3","none"
"1291","WP_111415595","WP_111415595_4","WP_111415595_4","Streptomyces","none","none","WP_111415595_4","Streptomyces sp. AC1-42T","1350","4","25.95","yes","MAETIVETASEVEGLTGEDFENLFADSPLIITDSEVRD","WP_111415595_4","none"
"1292","WP_030040480","WP_030040480_4","WP_030040480_4","Streptomyces","none","none","WP_030040480_4","Streptomyces resistomycificus","1439","4","27.08","yes","MAEVIVETASDVEELTGEDFEGLFADSPLIITDSEVRD","WP_030040480_4","none"
"1293","WP_063471945","WP_063471945_1","WP_063471945_1","Mycobacterium","Protein of unknown function (DUF3017)","PF11222.8","WP_063471945_1","Mycobacterium kansasii","3471","1","53.74","yes","MTARAILAHTFRAQWPILLVGLIFVVAFVLVGANFWRRGALLIGIGVGVAAALRLVLSDELAGLLVVRSKGTDFTTMAVVGAAMVYIASTIDPLGTG","WP_063471945_1","4.30E-25"
"1294","WP_085252934","WP_085252934_1","WP_085252934_1","Mycobacterium","Protein of unknown function (DUF1624)","PF07786.12","WP_085252934_1","Mycobacterium riyadhense","3657","1","46.94","yes","MTVRTILGRAVRAQWPILLVGLIFVVAFVLAAANFWRRGALLIGIGVGVAAALRLALPDERAGLLVVRSRGTDFLTTAAVGAAMVYIAWTIDPLGTG","WP_085252934_1","1.00E-06"
"1295","EUA05503","EUA05503_1","EUA05503_1","Mycobacterium","Protein of unknown function (DUF3017)","PF11222.8","EUA05503_1","Mycobacterium kansasii 824","3574","1","56.52","yes","MTARAILAHTFRAQWPILLVGLIFTVAFVLVGANFWRRGALLIGIGVGVAAALRLALSDELAGLLVVRSKGTDFTTMAVVGAAMVYIASTIDPLGTG","EUA05503_1","7.90E-25"
"1296","WP_085105271","WP_085105271_1","WP_085105271_1","Mycobacterium","Protein of unknown function (DUF3017)","PF11222.8","WP_085105271_1","Mycobacterium gastri","3582","1","51.51","yes","MTARAILAHTFRAQWPILLVGLIFVVAFVLVGANFWRRGALLIGIGVGVAAALRLVLSDEMAGLLVVRSKGTDFTTMAGVGAAMVYIASTIDPLGTG","WP_085105271_1","2.50E-25"
"1297","WP_085671318","WP_085671318_1","WP_085671318_1","Mycobacterium","Protein of unknown function (DUF3017)","PF11222.8","WP_085671318_1","Mycobacterium szulgai","3513","1","40.48","yes","MTVRAILGRAVRAQWPVLVVGLIFVVGFALAGANFWRRGALLIGIGVGVAAVLRLALPDERAGLLVVRSRGTDFLTTAAVGAAMVYIASTIDPLGTG","WP_085671318_1","2.50E-26"
"1298","WP_122530149","WP_122530149_1","WP_122530149_1","Mycobacterium","Protein of unknown function (DUF3017)","PF11222.8","WP_122530149_1","Mycobacterium kansasii","3560","1","58.09","yes","MTARAILAHTFRAQWPILLVGLIFVVAFVLVGANFWRRGALLIGIGVGVAAALRLVLSDDLAGLLVVRSKGTDFTTMAVVGAAMVYIASTIDPLGTG","WP_122530149_1","6.40E-25"
"1299","WP_083102943","WP_083102943_1","WP_083102943_1","Mycobacterium","Protein of unknown function (DUF3017)","PF11222.8","WP_083102943_1","Mycobacterium kansasii","3577","1","56.52","yes","MTARAILAHTFRAQWPILLVGLIFTVAFVLVGANFWRRGALLIGIGVGVAAALRLALSDELAGLLVVRSKGTDFTTMAVVGAAMVYIASTIDPLGTG","WP_083102943_1","7.90E-25"
"1300","OOK83994","OOK83994_1","OOK83994_1","Mycobacterium","Protein of unknown function (DUF3017)","PF11222.8","OOK83994_1","Mycobacterium kansasii","3577","1","56.52","yes","MTARAILAHTFRAQWPILLVGLIFTVAFVLVGANFWRRGALLIGIGVGVAAALRLALSDELAGLLVVRSKGTDFTTMAVVGAAMVYIASTIDPLGTG","OOK83994_1","7.90E-25"
"1301","WP_083115648","WP_083115648_1","WP_083115648_1","Mycobacterium","Protein of unknown function (DUF3017)","PF11222.8","WP_083115648_1","Mycobacterium angelicum","3603","1","65.47","yes","MTVRAILGRAVRAQWPVLVVGLIFLVAFALAGANFWRRGALLIGIGVGVAAALRLALPDERAGLLVVRSRGTDFLTTAAVGAAMVYIASTIDPLGTG","WP_083115648_1","1.60E-25"
"1302","WP_085014622","WP_085014622_2","WP_085014622_2","Frankia","Ribosomal protein L33","PF00471.20","WP_085014622_2","Frankia sp. KB5","4907","2","28.58","no","MARNEVRPKIKLRSTAGTGFTYITTKNRRNDPDRLQLMKYDPRIRRHVLFREER","WP_085014622_2","3.30E-22"
"1303","WP_085014620","WP_085014620_2","WP_085014620_2","Frankia","Ribosomal protein L33","PF00471.20","WP_085014620_2","Frankia sp. KB5","6369","2","28.58","no","MARNEVRPKIKLRSTAGTGFTYITTKNRRNDPDRLQLMKYDPRIRRHVLFREER","WP_085014620_2","3.30E-22"
"1304","WP_027743449","WP_027743449_5","WP_027743449_5","Streptomyces","Ribosomal protein L33","PF00471.20","WP_027743449_5","Streptomyces sp. CNT371","5537","5","28.21","yes","MLRAMASNELRPVIKLRSTAGTGYMYVTRKNRRNNPDRMHLRKYDPVVRRHVLFREER","WP_027743449_5","8.70E-21"
"1305","WP_093655900","WP_093655900_6","WP_093655900_6","Streptomyces","Ribosomal protein L33","PF00471.20","WP_093655900_6","Streptomyces radiopugnans","6699","6","24.58","no","MARSELRPVIKLRSTAGTGYTYVTRKNRRNDPDRMVLRKYDPLARRHVDFREER","WP_093655900_6","6.60E-19"
"1306","WP_093766414","WP_093766414_5","WP_093766414_5","Streptomyces","Ribosomal protein L33","PF00471.20","WP_093766414_5","Streptomyces sp. F-7","6252","5","21.14","no","MARNEVRPIIKLRSTAGTGYTYVTRKNRRNDPDRLVLRKYDPIARRHADFREER","WP_093766414_5","5.30E-19"
"1307","WP_093849541","WP_093849541_6","WP_093849541_6","Streptomyces","Ribosomal protein L33","PF00471.20","WP_093849541_6","Streptomyces pini","6650","6","24.13","no","MARSELRPVIKLRSTAGTGYTYVTRKNRRNDPDRMVLRKYDPLARRHVDFREER","WP_093849541_6","6.60E-19"
"1308","WP_064110435","WP_064110435_4","WP_064110435_4","Leifsonia","Ribosomal protein L33","PF00471.20","WP_064110435_4","Leifsonia xyli","4738","4","40.08","yes","MAKQQDIRPIIKLRSTAGTGYTYVTKKNRRNDPDRLVLKKYDPIVRKHVDFREER","WP_064110435_4","3.50E-21"
"1309","WP_090039557","WP_090039557_4","WP_090039557_4","Leifsonia","Ribosomal protein L33","PF00471.20","WP_090039557_4","Leifsonia sp. CL147","4753","4","36.86","yes","MAKQQDIRPIIKLRSTAGTGYTYVTKKNRRNDPDRLVLKKYDPVVRKHVDFREER","WP_090039557_4","2.40E-21"
"1310","WP_035849420","WP_035849420_3","WP_035849420_3","Cryptosporangium","Ribosomal protein L33","PF00471.20","WP_035849420_3","Cryptosporangium arvum DSM 44712","7014","3","44.39","yes","MARNEIRPIIKLRSTAGTGYTYVTRKNRRNDPNRLTLRKYDPVVKRHVEFREER","WP_035849420_3","3.60E-20"
"1311","WP_090039557","WP_090039557_1","WP_090039557_1","Leifsonia","Ribosomal protein S14p/S29e","PF00253.21","WP_090039557_1","Leifsonia sp. CL147","4923","1","71.1","yes","MAKTSKIAKNEQRKVIVARYATKRAELKKALVDPNGTDESREAARIGLQKLPRDASPIRVRNRDAVDGRPRGNLSKFGISRVRFRDMAHRGELPGITKSSW","WP_090039557_1","1.20E-27"
"1312","WP_085014620","WP_085014620_5","WP_085014620_5","Frankia","Ribosomal protein S14p/S29e","PF00253.21","WP_085014620_5","Frankia sp. KB5","6575","5","22.66","no","MAKASKIAADRRRREIVARHAERRAELKEIIRRPSTPQAERDAAVAELRRQPRDASATRLRNRDQVDGRPRGHLRDFGLSRIRFREMAHAGQLPGIRKASW","WP_085014620_5","2.40E-28"
"1313","WP_093655900","WP_093655900_2","WP_093655900_2","Streptomyces","Ribosomal protein S14p/S29e","PF00253.21","WP_093655900_2","Streptomyces radiopugnans","7170","2","46.8","yes","MAKKSQIAKNDRRRETAERYAARRAELKEIIRRPSSTEDERAAALAELRRQPRDASATRVRNRDAVDGRPRGHLRKFGLSRVRMRQQAHAGFLPGVTKSSW","WP_093655900_2","1.10E-25"
"1314","WP_035849420","WP_035849420_2","WP_035849420_2","Cryptosporangium","Ribosomal protein S14p/S29e","PF00253.21","WP_035849420_2","Cryptosporangium arvum DSM 44712","7178","2","52.33","yes","MAKKSKIARDARRRVIVARYAERRAELKRTIADPRATDDDRAAAVAELARQPRDASRTRVRNRDAVDGRPRGHLRKFGLSRVRFRQMAHAGELPGISKSSW","WP_035849420_2","1.30E-27"
"1315","WP_027743449","WP_027743449_2","WP_027743449_2","Streptomyces","Ribosomal protein S14p/S29e","PF00253.21","WP_027743449_2","Streptomyces sp. CNT371","4920","2","39.17","no","MAKTSKIAKNEQRRAVVARYAARRAELKQVIRRPSTPSDVREAAQRELRAQPRDASATRVRNRDAVDGRPRGYLRAFGLSRISVRTHAHAGHLPGVRKSSW","WP_027743449_2","4.50E-26"
"1316","WP_093849541","WP_093849541_1","WP_093849541_1","Streptomyces","Ribosomal protein S14p/S29e","PF00253.21","WP_093849541_1","Streptomyces pini","7121","1","51.83","yes","MAKKSKIAKNDERRATVERYAARRAELREIIRRTSSTEEERAAAQAELRRQPRDASATRVRNRDAVDGRPRGHLRKFGLSRVRMRQQAHAGFLPGVTKSSW","WP_093849541_1","1.60E-25"
"1317","WP_085014622","WP_085014622_7","WP_085014622_7","Frankia","Ribosomal protein S14p/S29e","PF00253.21","WP_085014622_7","Frankia sp. KB5","5113","7","22.66","no","MAKASKIAADRRRREIVARHAERRAELKEIIRRPSTPQAERDAAVAELRRQPRDASATRLRNRDQVDGRPRGHLRDFGLSRIRFREMAHAGQLPGIRKASW","WP_085014622_7","2.40E-28"
"1318","WP_093766414","WP_093766414_2","WP_093766414_2","Streptomyces","Domain of unknown function DUF148","PF02520.17","WP_093766414_2","Streptomyces sp. F-7","6723","2","48.03","yes","MARKSKIAQNEKRKAVVERYAARRAELKEIIRRPSSTDAERRAAVEELRRQPRDASATRVRNRDSVDGRPRGHLRKFGLSRVRVREQAHAGFLPGVTKSSW","WP_093766414_2","2.10E-06"
"1319","WP_064110435","WP_064110435_1","WP_064110435_1","Leifsonia","Ribosomal protein S14p/S29e","PF00253.21","WP_064110435_1","Leifsonia xyli","4908","1","75.76","yes","MAKKSKIAKNEQRKVVVARYAAKRAELKKALVDPNGTDESREAARVGLQKLPRDASPIRVRNRDAVDGRPRGNLSKFGISRVRFRDMAHRGELPGITKSSW","WP_064110435_1","1.20E-27"
"1320","KZC95159","KZC95159_1","KZC95159_1","Clavibacter","SecE/Sec61-gamma subunits of protein translocatio","PF00584.20","KZC95159_1","Clavibacter michiganensis subsp. tessellarius","6423","1","59.55","yes","MARKIVDEPSEEIVAQAREQRDARRNPFARLVLFIKQVVQELKKVVTPTRKELLTFTGVVLAFVIVMMVIVSLLDQLFGYLSIVVFGNGA","KZC95159_1","1.50E-21"
"1321","WP_086515725","WP_086515725_1","WP_086515725_1","Clavibacter","SecE/Sec61-gamma subunits of protein translocatio","PF00584.20","WP_086515725_1","Clavibacter michiganensis","6450","1","63.93","yes","MARKIVDEPSEEIVAQAREQRDARRNPFARLVLFIKQVVQELKKVVTPTRKELLTFTGVVLAFVIVMMVIVSLLDQLFGYLAIVVFGNGA","WP_086515725_1","2.50E-21"
"1322","WP_104343881","WP_104343881_1","WP_104343881_1","Clavibacter","SecE/Sec61-gamma subunits of protein translocatio","PF00584.20","WP_104343881_1","Clavibacter michiganensis","7180","1","62.81","yes","MARKIVDEPSEEIVAQAREQRDARRNPFARLVLFIKQVVQELKKVVTPTRKELLTFTGVVLAFVIVMMVIVSLLDQLFGYLAIVVFGNGA","WP_104343881_1","2.50E-21"
"1323","WP_043668521","WP_043668521_1","WP_043668521_1","Clavibacter","SecE/Sec61-gamma subunits of protein translocatio","PF00584.20","WP_043668521_1","Clavibacter michiganensis","7027","1","60.62","yes","MARKIVDEPSEEIVAQAREQRDARRNPFARLVLFIKQVVQELKKVVTPTRKELLTFTGVVLAFVIVMMVIVSLLDQLFGYLAIVVFGNGA","WP_043668521_1","2.50E-21"
"1324","WP_086517141","WP_086517141_1","WP_086517141_1","Clavibacter","SecE/Sec61-gamma subunits of protein translocatio","PF00584.20","WP_086517141_1","Clavibacter michiganensis","6582","1","61.04","yes","MARKIVDEPSEEIVAQAREQRDARRNPFARLVLFIKQVVQELKKVVTPTRKELLTFTGVVLAFVIVMMVIVSLLDQLFGYLAIVVFGNGA","WP_086517141_1","2.50E-21"
"1325","OUE10317","OUE10317_1","OUE10317_1","Clavibacter","SecE/Sec61-gamma subunits of protein translocatio","PF00584.20","OUE10317_1","Clavibacter michiganensis","7138","1","62.81","yes","MARKIVDEPSEEIVAQAREQRDARRNPFARLVLFIKQVVQELKKVVTPTRKELLTFTGVVLAFVIVMMVIVSLLDQLFGYLAIVVFGNGA","OUE10317_1","2.50E-21"
"1326","WP_053775823","WP_053775823_1","WP_053775823_1","Clavibacter","SecE/Sec61-gamma subunits of protein translocatio","PF00584.20","WP_053775823_1","Clavibacter michiganensis subsp. capsici","7052","1","59.42","yes","MARKIVDEPSEEIVAHAREQRDARRNPFARLVLFIKQVVQELKKVVTPTRKELLTFTGVVLAFVIVMMVIVSLLDQLFGYLAIVVFGNGA","WP_053775823_1","2.50E-21"
"1327","AWF97203","AWF97203_1","AWF97203_1","Clavibacter","SecE/Sec61-gamma subunits of protein translocatio","PF00584.20","AWF97203_1","Clavibacter michiganensis subsp. insidiosus","6378","1","59.4","yes","MARKIVDEPSEEIVAQAREQRDARRNPFARLVLFIKQVVQELKKVVTPTRKELLTFTGVVLAFVIVMMVIVSLLDQLFGYLAIVVFGNGA","AWF97203_1","2.50E-21"
"1328","OUE24647","OUE24647_1","OUE24647_1","Clavibacter","SecE/Sec61-gamma subunits of protein translocatio","PF00584.20","OUE24647_1","Clavibacter michiganensis","6510","1","61.04","yes","MARKIVDEPSEEIVAQAREQRDARRNPFARLVLFIKQVVQELKKVVTPTRKELLTFTGVVLAFVIVMMVIVSLLDQLFGYLAIVVFGNGA","OUE24647_1","2.50E-21"
"1329","WP_037862255","WP_037862255_3","WP_037862255_3","Streptomyces","none","none","WP_037862255_3","Streptomyces sp. NRRL S-340","1557","3","10.16","no","MKITTTTASEKRDDREVVVPGACSSCCGAVVRRRG","WP_037862255_3","none"
"1330","WP_055482843","WP_055482843_1","WP_055482843_1","Microbispora","none","none","WP_055482843_1","Microbispora sp. GMKU363","3894","1","10.41","yes","MKLESTATIDHRSMTAQPLGAGLSGAGFGVVVPGASSCCAGCTSSSCGTIVRP","WP_055482843_1","none"
"1331","WP_063758854","WP_063758854_2","WP_063758854_2","Streptomyces","none","none","WP_063758854_2","Streptomyces sp. NRRL S-340","2202","2","15.16","yes","MKITTTTASEKRDDREVVVPGACSSCCGAVVRRRG","WP_063758854_2","none"
"1332","WP_063832391","WP_063832391_1","WP_063832391_1","Streptomyces","none","none","WP_063832391_1","Streptomyces novaecaesareae","2126","1","16.95","yes","MELRSQAMVEHRNATAQVTLTGGRDEEIVIPGTCCCSAAIVRES","WP_063832391_1","none"
"1333","WP_055553439","WP_055553439_2","WP_055553439_2","Streptomyces","none","none","WP_055553439_2","Streptomyces kanamyceticus","2145","2","15.71","yes","MKLQSEKVAEHRNSTPQAALEPFGAGRDEAVLVPGACSCCCGAVVRK","WP_055553439_2","none"
"1334","AKJ13608","AKJ13608_4","AKJ13608_4","Streptomyces","none","none","AKJ13608_4","Streptomyces incarnatus","2162","4","26.1","yes","MKLTAKVVTEHRSRSAQPALEAFGAAGNQAVLVPGACCCCSGAVVRPRG","AKJ13608_4","none"
"1335","KIE24863","KIE24863_5","KIE24863_5","Streptomyces","none","none","KIE24863_5","Streptomyces sp. MUSC 125","2200","5","13.37","yes","MKLTAKVVTEHRSRSAQPALEAFGAAGNQAVLVPGACCCCSGAVVRPRG","KIE24863_5","none"
"1336","WP_051458184","WP_051458184_1","WP_051458184_1","Microbispora","none","none","WP_051458184_1","Microbispora sp. ATCC PTA-5024","3840","1","11.5","yes","MKLESTATVDHRSMTAQPLGAGLTGAGFGVVVPGASSCCAGCTSSSCGTIARP","WP_051458184_1","none"
"1337","WP_004018421","WP_004018421_2","WP_004018421_2","Mobiluncus","none","none","WP_004018421_2","Mobiluncus mulieris FB024-16","1989","2","4.06","yes","MRLTVTAIQDNRPRTYQMALATSTNVGGSPMLVTPGGCTCTIGCCCSCSCGTLQTAVE","WP_004018421_2","none"
"1338","WP_037881970","WP_037881970_2","WP_037881970_2","Streptomyces","Phosphopantetheine attachment site","PF00550.25","WP_037881970_2","Streptomyces sp. NRRL S-378","2690","2","37.49","yes","MPEDSMLRSVLAAVQEVAPAAAVNEDTQLIATRTIDSLSLLSLVSLLESEFSVTIRDSEILPAHFDTPLAIRAFLKSKGCR","WP_037881970_2","5.50E-09"
"1339","WP_067603246","WP_067603246_2","WP_067603246_2","Nocardiopsis","Phosphopantetheine attachment site","PF00550.25","WP_067603246_2","Nocardiopsis listeri NBRC 13360","3974","2","18.27","yes","MTVDDGVLTVIREAVHKAAPAFDGDDETQLITQQVLDSLAVLKVASRLENQLGVPIRDAELLPRNFASISAMRAFLATKGC","WP_067603246_2","2.70E-09"
"1340","WP_030040480","WP_030040480_2","WP_030040480_2","Streptomyces","Phosphopantetheine attachment site","PF00550.25","WP_030040480_2","Streptomyces resistomycificus","2696","2","55.48","yes","MAEDVVLRAVVAAVREVAPGAEIVDDTPLIAHRIVDSLSLLSLVSLLEKELSVTIRDSEILPAHFESPLAIRAFLRTKGC","WP_030040480_2","2.60E-10"
"1341","WP_030462613","WP_030462613_1","WP_030462613_1","Kitasatospora","Phosphopantetheine attachment site","PF00550.25","WP_030462613_1","Kitasatospora sp. NRRL B-11411","3951","1","55.66","yes","MSAADPVLETVRAAVRAAAPAFTGDDGTELILERVLDSLALVGVVARLEHELGVSIRDTEVLPRNFHSVTAIRAFLATKGR","WP_030462613_1","2.80E-08"
"1342","WP_088799351","WP_088799351_1","WP_088799351_1","Streptomyces","Phosphopantetheine attachment site","PF00550.25","WP_088799351_1","Streptomyces sp. 2112.5","6318","1","47.64","yes","MTEDSVLKAVLAAVREVAPGAEISDDTALIAQRVIDSLSLLSLVSLLEKEFSVTIRDSEILPAHFESPLAVRAFLKSKGC","WP_088799351_1","6.00E-10"
"1343","WP_111415595","WP_111415595_3","WP_111415595_3","Streptomyces","Phosphopantetheine attachment site","PF00550.25","WP_111415595_3","Streptomyces sp. AC1-42T","2697","3","44.61","yes","MTQDTVLESVIAAVREVAPGALVSEDTQLIAGRIIDSLSLLSLVALLEKEFPVTIRDAEVVPVNFETPTAIRAFLKTKGC","WP_111415595_3","4.30E-08"
"1344","WP_053747924","WP_053747924_1","WP_053747924_1","Streptomyces","Phosphopantetheine attachment site","PF00550.25","WP_053747924_1","Streptomyces sp. MMG1533","2697","1","59.01","yes","MAEDSVLRAVVAAVREVAPGAEVFDDTPLIAHRIVDSLSLLSLVSLLEKEFPVTIRDAEILPANFESPLAIRAFLKTKGC","WP_053747924_1","1.80E-09"
"1345","WP_088799362","WP_088799362_2","WP_088799362_2","Streptomyces","Phosphopantetheine attachment site","PF00550.25","WP_088799362_2","Streptomyces sp. 2112.5","2694","2","47.64","yes","MTEDSVLKAVLAAVREVAPGAEISDDTALIAQRVIDSLSLLSLVSLLEKEFSVTIRDSEILPAHFESPLAVRAFLKSKGC","WP_088799362_2","6.00E-10"
"1346","WP_063274437","WP_063274437_1","WP_063274437_1","Amycolatopsis","Phosphopantetheine attachment site","PF00550.25","WP_063274437_1","Amycolatopsis keratiniphila subsp. keratiniphila","5254","1","22.66","yes","MSGVVSLATVRAVIRDISPGQEVGDDTPLIAERIIDSLTLLKVVARLERDFGIHVGDRDIDPRNFESVRAIAAFIESKDR","WP_063274437_1","3.80E-11"
"1347","WP_062440803","WP_062440803_1","WP_062440803_1","Herbidospora","Coenzyme PQQ synthesis protein D (PqqD)","PF05402.12","WP_062440803_1","Herbidospora daliensis","5315","1","72.22","no","MALTISDAVIWQETADGVSLYHTETGAFSTLNETGSKIWMMVEQSGEREPIALSMSRAYARGNDAVSRRIVTEVNQFIGSMVENGMILEEA","WP_062440803_1","8.30E-10"
"1348","WP_114029832","WP_114029832_1","WP_114029832_1","Sphaerisporangium","Coenzyme PQQ synthesis protein D (PqqD)","PF05402.12","WP_114029832_1","Sphaerisporangium album","5960","1","57.66","no","MSLRINDSVVWQETAEGVSLYDIDTGAFTTLNATAARIWMLIDSDGEREPIVSKLSQEFAGGNTAVSRRIRADVQDFLGTMIERKLVEEHPA","WP_114029832_1","1.30E-14"
"1349","SIR58548","SIR58548_1","SIR58548_1","Microbispora","Coenzyme PQQ synthesis protein D (PqqD)","PF05402.12","SIR58548_1","Microbispora rosea","6237","1","74.85","no","MSLRISEAVIWQETGEGVSLYHTETGDFHSLNDTGSRIWKLVASDGEREPVMFKLSREFAGSNSAMSRRIVADVEEFIGTMIEQGFIEEVPAEQPAVKEESLS","SIR58548_1","6.20E-12"
"1350","WP_066366076","WP_066366076_1","WP_066366076_1","Herbidospora","Coenzyme PQQ synthesis protein D (PqqD)","PF05402.12","WP_066366076_1","Herbidospora mongoliensis","5422","1","77.01","no","MSLTISDSVIWQETADGVSLYHTETGDFSTLNETGSKIWMMVEETGEREPIALTMSRAYARGNDAVSHRIVSEVNRFIGSMVENGMILEEA","WP_066366076_1","8.70E-11"
"1351","WP_062349267","WP_062349267_1","WP_062349267_1","Herbidospora","Coenzyme PQQ synthesis protein D (PqqD)","PF05402.12","WP_062349267_1","Herbidospora yilanensis","5474","1","77.96","no","MALTISDAVIWQETADGVSLYHTETGAFSTLNETGSKIWMMVEQTGEREPIALSMSRAYARGNDAVSRRIVTEVNQFIGSMVENGMLLEEA","WP_062349267_1","7.90E-10"
"1352","WP_049570352","WP_049570352_3","WP_049570352_3","Nonomuraea","Coenzyme PQQ synthesis protein D (PqqD)","PF05402.12","WP_049570352_3","Nonomuraea sp. SBT364","5829","3","50.42","no","MSLQISDAVIWQETAGGISLYHTESGDFHSLNETASRIWTLVASEGEREAIVSELSQAFSGGSVAVSVRILKDVQEFLGSMIEQGLIEEGPALS","WP_049570352_3","1.60E-15"
"1353","WP_015622289","WP_015622289_1","WP_015622289_1","Actinoplanes","Coenzyme PQQ synthesis protein D (PqqD)","PF05402.12","WP_015622289_1","Actinoplanes sp. N902-109","3199","1","73.17","yes","MSLHISEDVIWNETPDGVSLYHTATGEFRSLNPSAARIWMLVADGDDRDTVVTRLRLLYGASTAVARERIGIDVARFLDTMVEQGMLDEKVAA","WP_015622289_1","8.70E-13"
"1354","WP_111167565","WP_111167565_1","WP_111167565_1","Sphaerisporangium","Coenzyme PQQ synthesis protein D (PqqD)","PF05402.12","WP_111167565_1","Sphaerisporangium sp. 7K107","4549","1","66.36","no","MSLRISDSVIWQETGDGISLYHTETGDFHSLNESGSKIWELVASEGEREKIITRLAEEFAGDNALVTVRIMRDVDEFLAGMVQQGLLEE","WP_111167565_1","1.90E-16"
"1355","WP_061300623","WP_061300623_1","WP_061300623_1","Herbidospora","Coenzyme PQQ synthesis protein D (PqqD)","PF05402.12","WP_061300623_1","Herbidospora cretacea","5323","1","73.31","no","MSLTISEAVIWQETADGVSLYHTETGDFHTLNETGSKIWILVEETGEREPIALTMSRAYARGNHAVSHRIVSEVNQFIGSMVESGMILEEA","WP_061300623_1","1.10E-09"
"1356","WP_113985589","WP_113985589_1","WP_113985589_1","Sphaerisporangium","Coenzyme PQQ synthesis protein D (PqqD)","PF05402.12","WP_113985589_1","Sphaerisporangium sp. LHW63015","4548","1","63.86","no","MSLRISDSIIWQETGDGISLYHTETGDFHSLNETGSKIWELVASEGEREKIITRLAEEFAGDNALVTVHIMRDVDRFLASMVEQGLLEE","WP_113985589_1","3.30E-17"
"1357","WP_018657395","WP_018657395_2","WP_018657395_2","Actinomadura","none","none","WP_018657395_2","Actinomadura flavalba DSM 45200","65","2","19.21","yes","MAHHGFVEPEEPQQGLKSHTPAVDAPFEWRDDSADERDEN","WP_018657395_2","none"
"1358","ALE82507","ALE82507_2","ALE82507_2","Pseudonocardia","none","none","ALE82507_2","Pseudonocardia sp. HH130629-09","677","2","31.4","yes","MLILSRAVVSVTTGARTVISDTEEQVMNHHGYEYEETDDAAPSRLRAHTPAVEDTFSWLIGDLADTEK","ALE82507_2","none"
"1359","WP_132339706","WP_132339706_4","WP_132339706_4","Nonomuraea","none","none","WP_132339706_4","Nonomuraea sp. KC201","1","4","16.28","yes","MAHHGFVEPEGPLNCLKSHTPAVDSPFEWREDDDE","WP_132339706_4","none"
"1360","WP_075941351","WP_075941351_1","WP_075941351_1","Pseudonocardia","none","none","WP_075941351_1","Pseudonocardia sp. CNS-139","1278","1","30.0","yes","MAHVTYEYEEVEDAPRRLRAHCTPAVDAPFSWIDDQAEED","WP_075941351_1","none"
"1361","WP_113979595","WP_113979595_1","WP_113979595_1","Sphaerisporangium","none","none","WP_113979595_1","Sphaerisporangium sp. LHW63015","67","1","17.25","yes","MAHPGFVEPDEPQSGIKSHTPAVDSPFEWREDGDDQ","WP_113979595_1","none"
"1362","WP_129800352","WP_129800352_1","WP_129800352_1","Streptomyces","none","none","WP_129800352_1","Streptomyces sp. F001","91","1","27.33","yes","MAHHGWAEPEEPQKGLKSHTPAVDAPFEWREEAEDEQTDS","WP_129800352_1","none"
"1363","WP_061294147","WP_061294147_1","WP_061294147_1","Herbidospora","none","none","WP_061294147_1","Herbidospora cretacea","172","1","25.37","yes","MAHPTFEELAESSVCIRSHTPAVDEAFTWHEDDAE","WP_061294147_1","none"
"1364","WP_092533827","WP_092533827_2","WP_092533827_2","Yuhushiella","none","none","WP_092533827_2","Yuhushiella deserti","838","2","24.28","yes","MAHHGYEYEEIDETAPRRLRAHTPAVEDSFGWLDTPDTEADEQAE","WP_092533827_2","none"
"1365","WP_117404578","WP_117404578_1","WP_117404578_1","Actinomadura","none","none","WP_117404578_1","Actinomadura sp. LHW52907","41","1","31.79","yes","MAHHGFAEPEEPQKGLKSHTPAVDAPFEWREDAADREAEQTES","WP_117404578_1","none"
"1366","WP_132172132","WP_132172132_1","WP_132172132_1","Actinomadura","none","none","WP_132172132_1","Actinomadura sp. KC216","15","1","32.84","yes","MFCALRKETAMAHHGFAEPEEPQKGLKSHTPAVDAPFEWREDRETEQAEEAEN","WP_132172132_1","none"
"1367","WP_017559667","WP_017559667_2","WP_017559667_2","Nocardiopsis","none","none","WP_017559667_2","Nocardiopsis baichengensis YIM 90130","1976","2","18.39","no","MPELLTEVPEIEVDTYGEEAVYFEPVVAGCSSSLVCCCCCS","WP_017559667_2","none"
"1368","OFK71393","OFK71393_2","OFK71393_2","Rothia","none","none","OFK71393_2","Rothia sp. HMSC065G12","2956","2","4.72","yes","MSDLLAALPKHFDTTVENVQTAGKAFEPTAARCTCSTVPCCCCWSN","OFK71393_2","none"
"1369","WP_017559667","WP_017559667_1","WP_017559667_1","Nocardiopsis","none","none","WP_017559667_1","Nocardiopsis baichengensis YIM 90130","2139","1","20.01","no","MPEPLTEVPEIEVDTYGEEAVYFEPVVAACSSSVISCCCCS","WP_017559667_1","none"
"1370","WP_083296694","WP_083296694_1","WP_083296694_1","Rothia","none","none","WP_083296694_1","Rothia sp. HMSC065G12","2893","1","4.72","yes","MSDLLAALPKHFDTTVENVQTAGKAFEPTAARCTCSTVPCCCCWSN","WP_083296694_1","none"
"1371","WP_017608824","WP_017608824_2","WP_017608824_2","Nocardiopsis","none","none","WP_017608824_2","Nocardiopsis xinjiangensis YIM 90004","2281","2","3.54","no","MNELLAEVPVVEVTTFGEESVYFEPVAAASSSSLISCCCCS","WP_017608824_2","none"
"1372","WP_046468711","WP_046468711_3","WP_046468711_3","Allosalinactinospora","none","none","WP_046468711_3","Allosalinactinospora lopnorensis","2165","3","16.66","no","MANVLETLGEVSEVELSFHGEESSYFEPTAARCSSSSTCTCCCTG","WP_046468711_3","none"
"1373","WP_120205519","WP_120205519_2","WP_120205519_2","Actinomyces","none","none","WP_120205519_2","Actinomyces sp. 2129","2240","2","15.47","yes","MSETATAQGFSIATYGEEETLFEPTAARCSSSSSTCCIACVRL","WP_120205519_2","none"
"1374","WP_119835460","WP_119835460_2","WP_119835460_2","Actinomyces","none","none","WP_119835460_2","Actinomyces sp. 2119","2003","2","15.47","yes","MSETATAQGFSIATYGEEETLFEPTAARCSSSSSTCCIACVRL","WP_119835460_2","none"
"1375","WP_101559196","WP_101559196_2","WP_101559196_2","Actinomyces","none","none","WP_101559196_2","Actinomyces oris","1981","2","0.3","yes","MTETKAPQGFSIVTYGEVEKFFEPTAARCSSSSSTCCVACWS","WP_101559196_2","none"
"1376","WP_131103335","WP_131103335_5","WP_131103335_5","Ornithinimicrobium","none","none","WP_131103335_5","Ornithinimicrobium sp. HY008","3970","5","12.01","yes","MTLPLTPDALRGAVDSAMVQTFGETAVLFEPTAARCSSSSSTCCVLCVKVS","WP_131103335_5","none"
"1377","WP_091114658","WP_091114658_1","WP_091114658_1","Geodermatophilus","Glutaredoxin","PF00462.24","WP_091114658_1","Geodermatophilus dictyosporus","3960","1","54.11","yes","MTDQAVTVYHRPGCPFSAKLRAQMALTRLPHRSVRFADDPDGAAAVRAHHPEGWEVSPTVVVGGRYLTNPSLREVREAVRA","WP_091114658_1","3.10E-11"
"1378","WP_106275543","WP_106275543_1","WP_106275543_1","Geodermatophilus","Glutaredoxin","PF00462.24","WP_106275543_1","Geodermatophilus tzadiensis","4367","1","53.29","yes","MTDQAVTVYYKPGCPFSAKLRAQLALARLPHRSVRFADDPDGAAAVRAHHPEGWEVSPTVVVDGRYLTNPSLREVREAVRA","WP_106275543_1","8.50E-12"
"1379","SFO01480","SFO01480_1","SFO01480_1","Geodermatophilus","none","none","SFO01480_1","Geodermatophilus obscurus","4162","1","48.74","yes","MADVAVTVTLARVPHRAVRFADDPEGAAAVRAHHPEGFELSPTVVVGGRYLTDPSLREVREAMAAR","SFO01480_1","none"
"1380","PYG35723","PYG35723_2","PYG35723_2","Geodermatophilus","Glutaredoxin","PF00462.24","PYG35723_2","Geodermatophilus sp. DSM 44511","4249","2","54.46","yes","MTDQAVTVYVKPGCPFSAKLRAKMALARLPHRAVCFADDPEGAAAVRAHHPEGWEVSPTVVVGGRYLTNPSLREVRAAMAGR","PYG35723_2","1.60E-11"
"1381","WP_093583210","WP_093583210_1","WP_093583210_1","Geodermatophilus","Glutaredoxin","PF00462.24","WP_093583210_1","Geodermatophilus amargosae","4315","1","63.58","yes","MTDEAVTVYVEPGCPFAAKLRTKMVLARVPHRAVRFADDPEGAAAVRAHHPEGFEVSPTVVVGGGYLTNPSLREVREAMAAR","WP_093583210_1","6.10E-08"
"1382","WP_110909804","WP_110909804_2","WP_110909804_2","Geodermatophilus","Glutaredoxin","PF00462.24","WP_110909804_2","Geodermatophilus sp. DSM 44511","4249","2","54.46","yes","MTDQAVTVYVKPGCPFSAKLRAKMALARLPHRAVCFADDPEGAAAVRAHHPEGWEVSPTVVVGGRYLTNPSLREVRAAMAGR","WP_110909804_2","1.60E-11"
"1383","SDC53518","SDC53518_1","SDC53518_1","Geodermatophilus","Glutaredoxin","PF00462.24","SDC53518_1","Geodermatophilus telluris","4427","1","50.48","yes","MGDRAVTVYYRPGCPHSARLRAQMALTRFPHRSVRFADDPDGAAAVRAHHPEGWEVSPTVVVGGRYLTNPSLREVREAVRA","SDC53518_1","1.70E-10"
"1384","WP_089404560","WP_089404560_2","WP_089404560_2","Geodermatophilus","Glutaredoxin","PF00462.24","WP_089404560_2","Geodermatophilus saharensis","3256","2","58.27","yes","MTDEPVVVYHKPGCPYSTKLRAKMRLTRLPHRSVRFADDPEAAAEVRSRHPQGWEVSPTVVVRGRYLTNPSLREVREAMRS","WP_089404560_2","1.00E-13"
"1385","WP_091365795","WP_091365795_1","WP_091365795_1","Geodermatophilus","Glutaredoxin","PF00462.24","WP_091365795_1","Geodermatophilus telluris","4427","1","50.48","yes","MGDRAVTVYYRPGCPHSARLRAQMALTRFPHRSVRFADDPDGAAAVRAHHPEGWEVSPTVVVGGRYLTNPSLREVREAVRA","WP_091365795_1","1.70E-10"
"1386","WP_075012634","WP_075012634_1","WP_075012634_1","Geodermatophilus","none","none","WP_075012634_1","Geodermatophilus obscurus","4162","1","48.74","yes","MADVAVTVTLARVPHRAVRFADDPEGAAAVRAHHPEGFELSPTVVVGGRYLTDPSLREVREAMAAR","WP_075012634_1","none"
"1387","AKH86621","AKH86621_2","AKH86621_2","Streptomyces","none","none","AKH86621_2","Streptomyces sp. CNQ-509","3940","2","25.44","yes","MPPETATAELTTESAPEASWEELVATALSGVEESPGWTDCWPTNPSCCSTCSLSAPDGTE","AKH86621_2","none"
"1388","ANS70161","ANS70161_2","ANS70161_2","Streptomyces","none","none","ANS70161_2","Streptomyces lincolnensis","3912","2","8.7","yes","MGKFTIRDVSESGWESLVVTALMGIEESPGWTDCWPTGGTSGACCTTSPAAPEPGV","ANS70161_2","none"
"1389","PJJ39560","PJJ39560_3","PJJ39560_3","Streptomyces","none","none","PJJ39560_3","Streptomyces sp. CNZ306","3922","3","25.91","yes","MPPETATAELTTESAPEASWEELVATALSGVEESPGWTDCWPTNPSCCSTCSLSAPDGTE","PJJ39560_3","none"
"1390","WP_078572841","WP_078572841_3","WP_078572841_3","Streptomyces","none","none","WP_078572841_3","Streptomyces sp. CNZ288","3925","3","24.64","yes","MPPETATAELTTESAPDASWEELVATALSGVEESPGWTDCWPTNPSCCSTCSLSAPDGTE","WP_078572841_3","none"
"1391","WP_131561563","WP_131561563_1","WP_131561563_1","Streptomyces","none","none","WP_131561563_1","Streptomyces sp. KM273126","4034","1","11.24","yes","MSRFTIRDVSESGWESLVVTALMGIEESPGWTDCWPTGGTSGVCCTTSPAAPEPGI","WP_131561563_1","none"
"1392","RZU94771","RZU94771_3","RZU94771_3","Streptomyces","none","none","RZU94771_3","Streptomyces sp. CNZ288","3925","3","24.64","yes","MPPETATAELTTESAPDASWEELVATALSGVEESPGWTDCWPTNPSCCSTCSLSAPDGTE","RZU94771_3","none"
"1393","WP_052770273","WP_052770273_2","WP_052770273_2","Streptomyces","none","none","WP_052770273_2","Streptomyces sp. CNQ-509","3940","2","25.44","yes","MPPETATAELTTESAPEASWEELVATALSGVEESPGWTDCWPTNPSCCSTCSLSAPDGTE","WP_052770273_2","none"
"1394","WP_078564093","WP_078564093_3","WP_078564093_3","Streptomyces","none","none","WP_078564093_3","Streptomyces sp. CNQ329","3915","3","24.27","yes","MPPETATAELTTESAPEASWEELVATALSGVEESPGWTDCWPTNPSCCSTCSLSAPDGTE","WP_078564093_3","none"
"1395","WP_100302786","WP_100302786_3","WP_100302786_3","Streptomyces","none","none","WP_100302786_3","Streptomyces sp. CNZ306","3922","3","25.91","yes","MPPETATAELTTESAPEASWEELVATALSGVEESPGWTDCWPTNPSCCSTCSLSAPDGTE","WP_100302786_3","none"
"1396","AXG59058","AXG59058_2","AXG59058_2","Streptomyces","none","none","AXG59058_2","Streptomyces lincolnensis","3912","2","8.7","yes","MGKFTIRDVSESGWESLVVTALMGIEESPGWTDCWPTGGTSGACCTTSPAAPEPGV","AXG59058_2","none"
"1397","WP_092556553","WP_092556553_3","WP_092556553_3","Actinoplanes","Domain of unknown function (DUF397)","PF04149.12","WP_092556553_3","Actinoplanes derwentensis","7609","3","11.55","no","MSIESASFDRRLATWKKSSRSGGSGGNCVEVASAPDGGWAIRDSKDPDGPFLLFTLAEWTAFVSGVKDGEFRK","WP_092556553_3","3.30E-29"
"1398","WP_017589866","WP_017589866_3","WP_017589866_3","Nocardiopsis","Domain of unknown function (DUF397)","PF04149.12","WP_017589866_3","Nocardiopsis ganjiahuensis DSM 45031","6433","3","28.98","no","MADWHKSSYSGGNNECVEAREHQAGADVRDTQNRELGHLSFNRAEWNAFVETTLHNHR","WP_017589866_3","1.20E-22"
"1399","WP_100806338","WP_100806338_6","WP_100806338_6","Streptomyces","Domain of unknown function (DUF397)","PF04149.12","WP_100806338_6","Streptomyces sp. M56","3219","6","26.61","no","MVSSEQTVSDASTLTGWYKSSYSGGSTPQGECLEVARGHADIPVRDSKDPHGPALIFEPSAWSAFVSAVKRGEFPTT","WP_100806338_6","4.70E-25"
"1400","WP_059190156","WP_059190156_4","WP_059190156_4","Streptomyces","Domain of unknown function (DUF397)","PF04149.12","WP_059190156_4","Streptomyces antibioticus","5962","4","14.82","no","MSTPRITEPSHDSDARWRKSSYSGGANDCIEIAVLPDHIALRDSKDIHRQPLLFSTAALRALINGIKR","WP_059190156_4","9.00E-22"
"1401","WP_023554016","WP_023554016_3","WP_023554016_3","Streptomyces","Domain of unknown function (DUF397)","PF04149.12","WP_023554016_3","Streptomyces roseochromogenus subsp. oscitans DS 12.976","6411","3","20.62","no","MNHPAQTALGADTLAWWKSSYSSEQGACVEVAHAPQGRMAVRDSKVHAGPHLLVDTHAFTALVAGLVTGTV","WP_023554016_3","7.40E-23"
"1402","WP_124286732","WP_124286732_7","WP_124286732_7","Streptomyces","Domain of unknown function (DUF397)","PF04149.12","WP_124286732_7","Streptomyces sp. ADI92-24","5288","7","10.5","no","MTNNRTIAAPELAGAGAVWQKSSYSDGAGNNCVEVADLTSTAYAGIAIRDSKVPEGPALHLSVDTFVALISGVCTV","WP_124286732_7","3.40E-23"
"1403","WP_100806338","WP_100806338_7","WP_100806338_7","Streptomyces","Domain of unknown function (DUF397)","PF04149.12","WP_100806338_7","Streptomyces sp. M56","3008","7","26.31","no","MVSSKHIIPNASALIGWFKSSYSGGSNGDCLEIARGHADIPVRDSKDPHGPALIFEPSAWSAFVSAVKRGEFPTT","WP_100806338_7","1.40E-27"
"1404","WP_006347379","WP_006347379_1","WP_006347379_1","Streptomyces","Domain of unknown function (DUF397)","PF04149.12","WP_006347379_1","Streptomyces tsukubensis","1446","1","40.5","yes","MSTEELVWFKSSYSGGSGDDCVEVATCPGTVHVRDSKIQDGPQLSLRPTAWNAFLTYAARH","WP_006347379_1","1.70E-26"
"1405","WP_030633187","WP_030633187_1","WP_030633187_1","Streptomyces","Domain of unknown function (DUF397)","PF04149.12","WP_030633187_1","Streptomyces halstedii","1726","1","33.0","yes","MSITAETLCGADWFKSSYSNDQGGNCVEGARLAGRVMAVRDSKDPERGTFVFPAVAWTAFLDDVKGGTSRA","WP_030633187_1","1.80E-26"
"1406","WP_114032054","WP_114032054_1","WP_114032054_1","Sphaerisporangium","Domain of unknown function (DUF397)","PF04149.12","WP_114032054_1","Sphaerisporangium album","2629","1","14.89","no","MGDLQGAKWRKSTYSTHNGNCVEVAANLPGLIAVRDSKTPTTPVLLPPAEWSAFLTGLKTGTLNT","WP_114032054_1","1.40E-25"
"1407","WP_123603612","WP_123603612_2","WP_123603612_2","Micromonospora","Domain of unknown function (DUF397)","PF04149.12","WP_123603612_2","Micromonospora sp. Llam0","7170","2","38.25","yes","MTTTDGLQWRKSSRSTDTGGDCVEVAAAWRKSSRSGDTGGDCVEVAGNLPGRVLVRDSKDRDGGTLAFSPTAWTTFLTHTPAR","WP_123603612_2","9.80E-12"
"1408","SBO93312","SBO93312_1","SBO93312_1","Nonomuraea","none","none","SBO93312_1","Nonomuraea gerenzanensis","37","1","27.52","yes","MGNVVDYVSVASLDRWSQHLTEAELARLEELTAGDGEE","SBO93312_1","none"
"1409","SPL97283","SPL97283_1","SPL97283_1","Actinomadura","none","none","SPL97283_1","Actinomadura parvosata subsp. kistnae","38","1","25.09","yes","MGNVVDYVSVASLDRCDQHLTEAELARLEELTAAAGDEEG","SPL97283_1","none"
"1410","WP_134033092","WP_134033092_1","WP_134033092_1","Streptomyces","none","none","WP_134033092_1","Streptomyces sp. BK447","81","1","28.68","yes","MGNGTYSGGQYDHSRSLTKDEQELTGDELQQLAEAGLSVTADEADAN","WP_134033092_1","none"
"1411","WP_103960548","WP_103960548_2","WP_103960548_2","Nonomuraea","none","none","WP_103960548_2","Nonomuraea solani","13","2","17.61","yes","MGNVVDYVCAESLDRRSQQLTQAELDRLGELMTAGDDEE","WP_103960548_2","none"
"1412","WP_090941614","WP_090941614_2","WP_090941614_2","Nonomuraea","none","none","WP_090941614_2","Nonomuraea jiangxiensis","74","2","25.02","yes","MGNVVDYVKVESLDTREQRLTGAELDRLEELLSTMTGDSED","WP_090941614_2","none"
"1413","WP_113984581","WP_113984581_2","WP_113984581_2","Sphaerisporangium","none","none","WP_113984581_2","Sphaerisporangium sp. LHW63015","13","2","15.39","yes","MGKVVDYIPAESLDRRTQHLTQAEIDVLADLLPESGLVGSPPVASGDAVR","WP_113984581_2","none"
"1414","WP_084772427","WP_084772427_3","WP_084772427_3","Nonomuraea","none","none","WP_084772427_3","Nonomuraea candida","17","3","20.1","yes","MGNVVDYVVVESLDRPNQRLTQTELDRLAELSPAPPDDQDR","WP_084772427_3","none"
"1415","SEG99236","SEG99236_2","SEG99236_2","Nonomuraea","none","none","SEG99236_2","Nonomuraea solani","29","2","17.61","yes","MGNVVDYVCAESLDRRSQQLTQAELDRLGELMTAGDDEE","SEG99236_2","none"
"1416","WP_111170305","WP_111170305_1","WP_111170305_1","Sphaerisporangium","none","none","WP_111170305_1","Sphaerisporangium sp. 7K107","14","1","23.49","yes","MGKVVDYIPAESLDRRTQHLTQAEIDIMADLLAAPEREPVPAATSRDADR","WP_111170305_1","none"
"1417","WP_012891705","WP_012891705_1","WP_012891705_1","Streptosporangium","none","none","WP_012891705_1","Streptosporangium roseum DSM 43021","10","1","13.29","yes","MGNIVDYITPPPETLDRKTQHLTRAELDRLRELLAAEDGE","WP_012891705_1","none"
"1418","WP_080042116","WP_080042116_1","WP_080042116_1","Nonomuraea","none","none","WP_080042116_1","Nonomuraea sp. ATCC 55076","13","1","25.09","yes","MGNVVDYVSVASLDRCDQHLTEAELARLEELTAAAGDEEG","WP_080042116_1","none"
"1419","WP_113979657","WP_113979657_4","WP_113979657_4","Sphaerisporangium","Helix-turn-helix domain","PF12840.7","WP_113979657_4","Sphaerisporangium sp. LHW63015","3735","4","20.4","yes","MSGSAAHPRLELDAVIHPPIRLSVLAVLSRNRRLEFGKMRDEVAVSAAALSKHMKSLELAGYIQVQKGYVGRRPRTWLAITEPGLNAFERHTAALLAISRGPS","WP_113979657_4","2.50E-10"
"1420","WP_114018158","WP_114018158_1","WP_114018158_1","Streptomyces","Helix-turn-helix domain","PF12840.7","WP_114018158_1","Streptomyces sp. LHW50302","3077","1","56.23","yes","MSATRHPRHRLDPLLQSPVRFSVMAALASAERLEFRFVRDAVEINDSALSKQSATLEEAGLVEVEKGYLGKRPRTWLSATPKGREVFQEHCACLREIARGVEADRLPADSA","WP_114018158_1","3.60E-09"
"1421","WP_084211656","WP_084211656_2","WP_084211656_2","Pseudonocardia","Winged helix DNA-binding domain","PF13601.6","WP_084211656_2","Pseudonocardia acaciae DSM 45401","3004","2","35.64","yes","MAALAATGEAEFKALREALEVSESLLSQHVRVLEDAGYVHVRKGFIGKRPRTWLSLTPQGQQAFAGHCDTLRAIIATPVAGLASTRTPDNRSQETS","WP_084211656_2","2.40E-27"
"1422","WP_079171959","WP_079171959_1","WP_079171959_1","Streptomyces","Helix-turn-helix domain","PF12840.7","WP_079171959_1","Streptomyces qinglanensis","3176","1","47.05","yes","MSTARHPRHRLEPLLQSPVRFSVLAALAAAERLEFRFVRDVVEVSDSALSKQSAALEEAGLVEVEKGYLGKRPRTWLKATPKGRQVFQEHCEGLQAIARGPEVDPPQDPGER","WP_079171959_1","6.70E-10"
"1423","WP_111166051","WP_111166051_7","WP_111166051_7","Sphaerisporangium","Winged helix DNA-binding domain","PF13601.6","WP_111166051_7","Sphaerisporangium sp. 7K107","3973","7","13.34","yes","MRDAVAVSAAALSKHMKSLELAGYIQVQKGYVGRRPRTWLAITQPGLDAFERHTAALLAISRGQS","WP_111166051_7","1.40E-21"
"1424","WP_099881056","WP_099881056_1","WP_099881056_1","Streptomyces","Helix-turn-helix domain","PF12840.7","WP_099881056_1","Streptomyces sp. CNZ279","2978","1","50.47","yes","MKGARHPRHRLEPLLQSPVRFSVMAALASAERLEFRFVRDAVEINDSALSKQSAALEEAGLVEVEKGYLGKRPRTWLKATPKGREVFQEHCAGLQAIARGLAADPPAESLDRPTGGEG","WP_099881056_1","2.70E-09"
"1425","WP_114021280","WP_114021280_1","WP_114021280_1","Candidatus","Helix-turn-helix domain","PF12840.7","WP_114021280_1","Candidatus Streptomyces philanthi","3283","1","59.68","yes","MSATRHPRHRLDPLLQSPVRFSVMAALASAERLEFRFVRDAVEINDSALSKQSATLEEAGLVEVEKGYLGKRPRTWLSATSKGREVFQEHCACLREIARGVDADRLPVDGS","WP_114021280_1","3.10E-09"
"1426","WP_027760735","WP_027760735_1","WP_027760735_1","Streptomyces","Helix-turn-helix domain","PF12840.7","WP_027760735_1","Streptomyces sp. CNT318","3193","1","44.16","yes","MSSTARHPRHRLEPLLQSPVRFSVLAALATAERLEFRFVRDVVEVSDSALSKQSAALEEAGLVEVEKGYLGKRPRTWLKATPKGRRIFQEHCEGLQAIARGPEAEPPADSGGR","WP_027760735_1","6.30E-10"
"1427","OEV01037","OEV01037_1","OEV01037_1","Streptomyces","Helix-turn-helix domain","PF12840.7","OEV01037_1","Streptomyces qinglanensis","3337","1","44.7","yes","MSSTARHPRHRLEPLLQSPVRFSVLAALATAERLEFRFVRDVVEVSDSALSKQSAALEEAGLVEVEKGYLGKRPRTWLKATPKGRRIFQEHCEGLQAIARGPEAEPPADSGGR","OEV01037_1","6.30E-10"
"1428","WP_086575168","WP_086575168_3","WP_086575168_3","Streptosporangium","Winged helix-turn-helix DNA-binding","PF13412.6","WP_086575168_3","Streptosporangium minutum","3410","3","8.48","no","MCDAVGISAAVLSKHMTSLEAAGYIQVQKGYVGRRPRTWLSITAPGADAFERHTAALLAISRGPS","WP_086575168_3","1.20E-06"
"1429","WP_111035529","WP_111035529_1","WP_111035529_1","Curtobacterium","Helix-turn-helix domain","PF12840.7","WP_111035529_1","Curtobacterium sp. MCBD17_019","7539","1","41.43","yes","MTEHPRHRLVAELMHPLRLSIVAKIVGNHSIAFRDLRDVLDVSDSTLSKQCAILEAAGVLTVTKAFVGKTPRTRFSLSAEGETQWAGHRAALCELIGVEAGPL","WP_111035529_1","9.10E-09"
"1430","WP_043014356","WP_043014356_2","WP_043014356_2","Corynebacterium","Selenoprotein, putative","PF04328.13","WP_043014356_2","Corynebacterium pseudotuberculosis","6732","2","6.05","yes","METLSTALRWATAPLRYWGEVLGEKDYEKFVAHRRVHHPHESIPSEREYWRQRWAEQDANPGSRCC","WP_043014356_2","3.30E-24"
"1431","ESU58068","ESU58068_2","ESU58068_2","Corynebacterium","Selenoprotein, putative","PF04328.13","ESU58068_2","Corynebacterium ulcerans NCTC 12077","6822","2","9.07","yes","METLSTALRWATAPLRYWGEVLGEKDYEKFVAHQRAHHPHESIPSEREYWRQRWADQDSNPGSRCC","ESU58068_2","4.20E-24"
"1432","WP_046096646","WP_046096646_2","WP_046096646_2","Corynebacterium","Selenoprotein, putative","PF04328.13","WP_046096646_2","Corynebacterium ulcerans","6799","2","9.07","yes","METLSTALRWATAPLRYWGEVLGEKDYEKFVAHQRAHHPHESIPSEREYWRQRWADQDSNPGSRCC","WP_046096646_2","4.20E-24"
"1433","AIG09585","AIG09585_2","AIG09585_2","Corynebacterium","Selenoprotein, putative","PF04328.13","AIG09585_2","Corynebacterium pseudotuberculosis","6733","2","5.95","yes","METLSTALRWATAPLRYWGEVLGEKDYEKFVAHRRAHHPHESIPSEREYWRQRWAEQDANPGSRCC","AIG09585_2","2.40E-24"
"1434","AKS13949","AKS13949_1","AKS13949_1","Corynebacterium","Selenoprotein, putative","PF04328.13","AKS13949_1","Corynebacterium pseudotuberculosis","6734","1","6.5","yes","METLSTALRWATAPLRYWGEVLGEKDYEKFVAHRRAHHPHESIPSEREYWRQRWAEQDANPGSRCC","AKS13949_1","2.40E-24"
"1435","AER69640","AER69640_1","AER69640_1","Corynebacterium","Selenoprotein, putative","PF04328.13","AER69640_1","Corynebacterium pseudotuberculosis 1/06-A","6734","1","6.05","yes","METLSTALRWATAPLRYWGEVLGEKDYEKFVAHRRVHHPHESIPSEREYWRQRWAEQDANPGSRCC","AER69640_1","3.30E-24"
"1436","WP_087454414","WP_087454414_2","WP_087454414_2","Corynebacterium","Selenoprotein, putative","PF04328.13","WP_087454414_2","Corynebacterium sp. KL0182","6832","2","10.6","yes","METLSTTLRWATAPLRYWGEVLGEKDYEKFVAHRRAHHPHESIPSEREYWRQRWADQDSNPGSRCC","WP_087454414_2","1.50E-24"
"1437","AKP09252","AKP09252_2","AKP09252_2","Corynebacterium","Selenoprotein, putative","PF04328.13","AKP09252_2","Corynebacterium pseudotuberculosis","6734","2","6.32","yes","METLSTALRWATAPLRYWGEVLGEKDYEKFVAHRRAHHPHESIPSEREYWRQRWAEQDANPGSRCC","AKP09252_2","2.40E-24"
"1438","WP_038620030","WP_038620030_2","WP_038620030_2","Corynebacterium","Selenoprotein, putative","PF04328.13","WP_038620030_2","Corynebacterium ulcerans","6822","2","9.99","yes","METLSTALRWATAPLRYWGEVLGEKDYEKFVAHQRAHHPHESIPSEREYWRQRWADQDSNPGSRCC","WP_038620030_2","4.20E-24"
"1439","WP_048589183","WP_048589183_2","WP_048589183_2","Corynebacterium","Selenoprotein, putative","PF04328.13","WP_048589183_2","Corynebacterium pseudotuberculosis","6734","2","6.32","yes","METLSTALRWATAPLRYWGEVLGEKDYEKFVAHRRAHHPHESIPSEREYWRQRWAEQDANPGSRCC","WP_048589183_2","2.40E-24"
"1440","WP_054468484","WP_054468484_3","WP_054468484_3","Corynebacterium","Selenoprotein, putative","PF04328.13","WP_054468484_3","Corynebacterium ulcerans","6800","3","9.07","yes","METLSTALRWATAPLRYWGEVLGEKDYEKFVAHQRAHHPHESIPSEREYWRQRWADQDSNPGSRCC","WP_054468484_3","4.20E-24"
"1441","WP_036403339","WP_036403339_1","WP_036403339_1","Mycobacterium","Protein of unknown function (DUF732)","PF05305.14","WP_036403339_1","Mycobacterium kansasii 732","554","1","24.45","no","MTAPVMALRLLALAAGVLGMSATMAAPTHADMMGNAFLTALNNAGISYGQPAAAMAIGRSVCPMAVQPDGTFDSVVARMAEDNGMSHDAAAAFTIVAIATYCPAVLYPLLPNRLQA","WP_036403339_1","1.20E-24"
"1442","WP_083271029","WP_083271029_1","WP_083271029_1","Mycobacterium","Protein of unknown function (DUF732)","PF05305.14","WP_083271029_1","Mycobacterium gordonae","3595","1","30.31","no","MTAPAIALRALAVAAGVFGVSATVAAPIHADMMGNAFLNALNNAGIPYSQPATAIALGRSVCPKALSPGGSFDAIVSEMAEINGLSQERAAAFTIVAIATYCPALIAPMLPHRLQA","WP_083271029_1","5.10E-26"
"1443","WP_055578070","WP_055578070_1","WP_055578070_1","Mycobacterium","Protein of unknown function (DUF732)","PF05305.14","WP_055578070_1","Mycobacterium gordonae","466","1","39.64","no","MTAPAIAFRLLALAAGVFGVSATVAAPIHADMLGNAFLNALNNAGIPYTQPSTAVALGRSVCPKALSPGGSFDAIVEEMAELNGLPRERAAAFTIVAIATYCPALISPMLPHRLQA","WP_055578070_1","2.50E-25"
"1444","WP_122442751","WP_122442751_1","WP_122442751_1","Mycobacterium","Protein of unknown function (DUF732)","PF05305.14","WP_122442751_1","Mycobacterium attenuatum","488","1","29.11","no","MTASVMALRLVALAAGVLGMSATMAAPTHADMMGNAFLTALNNAGISYGQPATAMAIGRSVCPMAVQPDGTFDSVVAKMAENNGMSHDAAAAFTIVAIATYCPAVLYPLLPNRLQA","WP_122442751_1","9.80E-25"
"1445","WP_065136618","WP_065136618_1","WP_065136618_1","Mycobacterium","Protein of unknown function (DUF732)","PF05305.14","WP_065136618_1","Mycobacterium gordonae","578","1","30.31","no","MTAPAIALRALAVAAGVFGVSATVAAPIHADMMGNAFLNALNNAGIPYSQPATAIALGRSVCPKALSPGGSFDAIVSEMAEINGLSQERAAAFTIVAIATYCPALIAPMLPHRLQA","WP_065136618_1","5.10E-26"
"1446","WP_065164254","WP_065164254_2","WP_065164254_2","Mycobacterium","Protein of unknown function (DUF732)","PF05305.14","WP_065164254_2","Mycobacterium gordonae","464","2","23.68","no","MTAPAIAFRLLALAAGVFGVSATVAAPIHADMLGNAFLNALNNAGVPYSEPSTAVALGRTVCPKALSPGGSFDAIVSEMAQLNGLPPDRAAAFTIVAIATYCPALIAPMLPHRLQA","WP_065164254_2","8.10E-25"
"1447","WP_075510821","WP_075510821_1","WP_075510821_1","Mycobacterium","Protein of unknown function (DUF732)","PF05305.14","WP_075510821_1","Mycobacterium kansasii","639","1","23.94","no","MTASVMALRLLALAAGVLGMSATMAAPTHADMMGNAFLTALNNAGISYGQPAAAMAIGRSVCPMAVQPDGTFDSVVAKMAEDNGMSHDVAAAFTIVAIATYCPAVLYPLLPNRLQA","WP_075510821_1","1.70E-24"
"1448","WP_133437797","WP_133437797_2","WP_133437797_2","Mycobacterium","Protein of unknown function (DUF732)","PF05305.14","WP_133437797_2","Mycobacterium paragordonae","473","2","22.03","no","MTAPAIAFRLLALAAGVFGVSATVAAPIHADMLGNAFLNALNNAGVPYSEPSTAVALGRTVCPKALSPGGSFDAIVSEMAQLNGLPPDRAAAFTIVAIATYCPALIAPMLPHRLQA","WP_133437797_2","8.10E-25"
"1449","ORC04413","ORC04413_1","ORC04413_1","Mycobacterium","Protein of unknown function (DUF732)","PF05305.14","ORC04413_1","Mycobacterium persicum","595","1","22.72","no","MTASMMALRLLASAAGVLGMSATMAAPTHADMMGNAFLTALNNAGISYGQPAAAMAIGRSVCPMAVQPDGTFESVVAKMAEDNGMSHDAAAAFTIVAIATYCPAVIYPLLPNRLQA","ORC04413_1","1.40E-24"
"1450","RUP01435","RUP01435_1","RUP01435_1","Mycobacterium","Protein of unknown function (DUF732)","PF05305.14","RUP01435_1","Mycobacterium sp.","618","1","43.97","no","MTAPAIALRLLALATGVFGVSATVAAPIHADMLGNAFLNALTNAGVPYSQPATAVALGRSVCPKALSPGGSFDSIVSEMAELNNLPRERAAAFTIVAIATYCPALISPMLPHRLQA","RUP01435_1","1.30E-24"
"1451","ODR23958","ODR23958_1","ODR23958_1","Mycobacterium","Protein of unknown function (DUF732)","PF05305.14","ODR23958_1","Mycobacterium gordonae","3597","1","30.31","no","MTAPAIALRALAVAAGVFGVSATVAAPIHADMMGNAFLNALNNAGIPYSQPATAIALGRSVCPKALSPGGSFDAIVSEMAEINGLSQERAAAFTIVAIATYCPALIAPMLPHRLQA","ODR23958_1","5.10E-26"
"1452","WP_091448332","WP_091448332_1","WP_091448332_1","Geodermatophilus","none","none","WP_091448332_1","Geodermatophilus poikilotrophus","3707","1","44.92","yes","MGNDDLQRLVQRRLLELSSSPQAASRRAQWAVAPETIAHIAAGRHSGMVSERLAAALARALDVPENRVRRVAGLPLVEDPDADVRTGPHLRVVRDDGRLA","WP_091448332_1","none"
"1453","SDY68794","SDY68794_3","SDY68794_3","Geodermatophilus","Helix-turn-helix domain","PF13560.6","SDY68794_3","Geodermatophilus africanus","3697","3","27.58","yes","MADDDLQRLVQRRLFELGGDAVAAARRSCWAVTAQTIERIAGGQHRRPVTERLAEALARALDVPANRVRRVAGLPLVDDAREDIHTGPHLRIVRDDGRLP","SDY68794_3","2.80E-07"
"1454","WP_041241887","WP_041241887_1","WP_041241887_1","Geodermatophilus","none","none","WP_041241887_1","Geodermatophilus obscurus DSM 43160","3519","1","43.52","yes","MGNDDLQRLVQRRLLELASSTQAASRRAQWAVAPETIAHIAAGRHSGMVSERLAAALARALDVPENRVRRVAGLPLVEDPGADICTGPHLRVVRDDGRLA","WP_041241887_1","none"
"1455","WP_089304860","WP_089304860_1","WP_089304860_1","Geodermatophilus","Helix-turn-helix domain","PF13560.6","WP_089304860_1","Geodermatophilus pulveris","3701","1","29.94","yes","MADDLQQLVRRRLLELSSTAQAASRRAQWAIAPETITRIADGRHSGMVSERLAAALARALDVPENRVRRLAGLPLLADPRADICTGPHLRVVRDDGRPA","WP_089304860_1","1.80E-07"
"1456","WP_091159224","WP_091159224_3","WP_091159224_3","Geodermatophilus","Helix-turn-helix domain","PF13560.6","WP_091159224_3","Geodermatophilus africanus","3697","3","27.58","yes","MADDDLQRLVQRRLFELGGDAVAAARRSCWAVTAQTIERIAGGQHRRPVTERLAEALARALDVPANRVRRVAGLPLVDDAREDIHTGPHLRIVRDDGRLP","WP_091159224_3","2.80E-07"
"1457","SDL97273","SDL97273_2","SDL97273_2","Geodermatophilus","Helix-turn-helix domain","PF13560.6","SDL97273_2","Geodermatophilus siccatus","3547","2","30.61","yes","MADDDLQRLVQRRLMELSSSAQAASRRAQWAIAPETIARIAAGRHSGMVSERLAAALARALDVPENRVRRVVGLPLVEDSRADVCTGPHLRVVRDDGRLA","SDL97273_2","1.60E-06"
"1458","WP_091374161","WP_091374161_1","WP_091374161_1","Geodermatophilus","Helix-turn-helix domain","PF13560.6","WP_091374161_1","Geodermatophilus sp. DSM 45219","3730","1","35.17","yes","MGNDLQQLVQRRLLELSSSTQAASRRAQWAVAPETIAHIAAGRHSGMVSERLAAALARALDVPENRVRRVAGLPLLEDPRADICTGPHLRVVRDDGRLA","WP_091374161_1","5.20E-07"
"1459","WP_113781263","WP_113781263_1","WP_113781263_1","Geodermatophilus","Helix-turn-helix domain","PF13560.6","WP_113781263_1","Geodermatophilus sp. TF02-6","2803","1","35.63","yes","MADEDLQRLVQRRLLELGVSAEQASRRASWAVAPETIARIAHGRHPRLVSERLAQALARALDVPENRVRRAVGLPLVADDRADVHTRPHLRIVRDDGRPA","WP_113781263_1","5.20E-08"
"1460","ADB73782","ADB73782_1","ADB73782_1","Geodermatophilus","none","none","ADB73782_1","Geodermatophilus obscurus DSM 43160","3519","1","43.52","yes","MGNDDLQRLVQRRLLELASSTQAASRRAQWAVAPETIAHIAAGRHSGMVSERLAAALARALDVPENRVRRVAGLPLVEDPGADICTGPHLRVVRDDGRLA","ADB73782_1","none"
"1461","SDN42488","SDN42488_1","SDN42488_1","Geodermatophilus","Helix-turn-helix domain","PF13560.6","SDN42488_1","Geodermatophilus sp. DSM 45219","3730","1","35.17","yes","MGNDLQQLVQRRLLELSSSTQAASRRAQWAVAPETIAHIAAGRHSGMVSERLAAALARALDVPENRVRRVAGLPLLEDPRADICTGPHLRVVRDDGRLA","SDN42488_1","5.20E-07"
"1462","WP_091216389","WP_091216389_2","WP_091216389_2","Geodermatophilus","Helix-turn-helix domain","PF13560.6","WP_091216389_2","Geodermatophilus siccatus","3547","2","30.61","yes","MADDDLQRLVQRRLMELSSSAQAASRRAQWAIAPETIARIAAGRHSGMVSERLAAALARALDVPENRVRRVVGLPLVEDSRADVCTGPHLRVVRDDGRLA","WP_091216389_2","1.60E-06"
"1463","WP_015622289","WP_015622289_3","WP_015622289_3","Actinoplanes","Bacterial regulatory proteins, luxR family","PF00196.19","WP_015622289_3","Actinoplanes sp. N902-109","2846","3","30.73","no","MSPSTSRVSARDLHLMALLARGHTTDRAARELRLSRHTVGEEISALLGRFGCRNRAELVAYCYVHRLLPVGVWPPPCSLGG","WP_015622289_3","1.10E-11"
"1464","WP_113985589","WP_113985589_3","WP_113985589_3","Sphaerisporangium","Helix-turn-helix domain of resolvase","PF02796.15","WP_113985589_3","Sphaerisporangium sp. LHW63015","4031","3","25.4","no","MLAKGYTTTRIARELHLSRYTVAEWISKLLDRFSCSNRSQLVAYSYAHRLLHVGIWPPSASSAIS","WP_113985589_3","1.70E-05"
"1465","WP_061300623","WP_061300623_3","WP_061300623_3","Herbidospora","Helix-turn-helix domain","PF18024.1","WP_061300623_3","Herbidospora cretacea","3762","3","37.07","no","MDLAYDDLINDRDRWLIVMLARGYTTTRIAREMHLSRYTVAERISKLLDQFACSNRSQLVAYSYAHQFLNVGVWPPGTPH","WP_061300623_3","1.90E-06"
"1466","SIR58548","SIR58548_2","SIR58548_2","Microbispora","Homeodomain-like domain","PF13384.6","SIR58548_2","Microbispora rosea","2145","2","35.92","no","MDLASDGLINDRDRWLIVMLARGYTTTRIAREMHLSRYTVAERISKLLVQFACSNRSQLVAYFYAHRLLNVGIWPPSVSGVVG","SIR58548_2","8.20E-09"
"1467","WP_084316863","WP_084316863_1","WP_084316863_1","Actinospica","Bacterial regulatory proteins, luxR family","PF00196.19","WP_084316863_1","Actinospica robiniae DSM 44927","2869","1","60.39","no","MAVKFGGRISAREAQLVAMIARGYTTDRAARELRLSRHTVGEEISILLGRFECSNRAALVAYCYVHCLLPVGIWPPPYEPHAPAER","WP_084316863_1","1.60E-11"
"1468","WP_114029832","WP_114029832_3","WP_114029832_3","Sphaerisporangium","Helix-turn-helix domain","PF18024.1","WP_114029832_3","Sphaerisporangium album","4205","3","33.29","no","MSLTSEDLINDRDRSLIVMLARGYTTTRIAREMHLSRYTVAERISKLLDQFACSNRSQLVAYSYAHELLRVGIWPPSAPNVIGEGVF","WP_114029832_3","7.40E-07"
"1469","WP_081903334","WP_081903334_1","WP_081903334_1","Microbispora","Homeodomain-like domain","PF13384.6","WP_081903334_1","Microbispora rosea subsp. nonnitritogenes","1951","1","38.51","no","MDLASDGLINDRDRWLIVMLARGYTTTRIAREMHLSRYTVAERISKLLVQFACSNRSQLVAYFYAHRLLNVGIWPPSVSGVVG","WP_081903334_1","8.20E-09"
"1470","WP_111167565","WP_111167565_4","WP_111167565_4","Sphaerisporangium","Sigma-70, region 4","PF04545.16","WP_111167565_4","Sphaerisporangium sp. 7K107","3977","4","26.26","no","MDLGSVGVLNDRDRELIVMLAKGYTTTRIARELHLSRYTVAEWISKLLDRFSCSNRSQLVAYSYAHRLLHVGIWPPSASSAIS","WP_111167565_4","1.30E-05"
"1471","WP_111700764","WP_111700764_2","WP_111700764_2","Microbispora","Homeodomain-like domain","PF13384.6","WP_111700764_2","Microbispora triticiradicis","2107","2","40.59","no","MDLVSDGLISDRDRWLIVMLARGYTTTKIAREMHLSRYTVAERISKLLVQFACSNRSQLVAYFYAHRLLHVGIWPPSVSDALG","WP_111700764_2","7.10E-09"
"1472","WP_083744315","WP_083744315_1","WP_083744315_1","Microbispora","Homeodomain-like domain","PF13384.6","WP_083744315_1","Microbispora rosea","1950","1","35.92","no","MDLASDGLINDRDRWLIVMLARGYTTTRIAREMHLSRYTVAERISKLLVQFACSNRSQLVAYFYAHRLLNVGIWPPSVSGVVG","WP_083744315_1","8.20E-09"
"1473","WP_049570352","WP_049570352_4","WP_049570352_4","Nonomuraea","Bacterial regulatory proteins, luxR family","PF00196.19","WP_049570352_4","Nonomuraea sp. SBT364","4005","4","43.37","no","MDLASVDLLNDRDTGLIVMLAKGYTTARIAREMNLSRYTVAERIGKLLDRFACSNRSQLVAYSYAHRLLDVGIWPPGTA","WP_049570352_4","5.70E-12"
"1474","WP_066366076","WP_066366076_3","WP_066366076_3","Herbidospora","Helix-turn-helix domain","PF18024.1","WP_066366076_3","Herbidospora mongoliensis","3768","3","45.29","no","MDLAYDDLINDRDRSLIVMLARGYTTTRIAREMHLSRYTIAERISKLLEQFACSNRSELVAYSYAHRFLNVGVWPPGILKAGPSPQRSA","WP_066366076_3","3.10E-07"
"1475","WP_110909804","WP_110909804_3","WP_110909804_3","Geodermatophilus","Domain of unknown function (DUF1905)","PF08922.11","WP_110909804_3","Geodermatophilus sp. DSM 44511","7465","3","14.45","yes","MRVFGTRGLVKVAGTVDGEPFRSSFMAMGDGTHKLPVAAGIRRTIGKQAGDEVEVHLLERITGGTAS","WP_110909804_3","1.10E-21"
"1476","SFO01480","SFO01480_3","SFO01480_3","Geodermatophilus","Domain of unknown function (DUF1905)","PF08922.11","SFO01480_3","Geodermatophilus obscurus","6090","3","33.76","yes","MTCTDGAVQREITPSAHTTARPMSPAPDAGLPPYHRDEEDVMDQRFSATLQKSPAPGGWTHLVWRESVRELGTRGRVAVAGTVDGYPS","SFO01480_3","4.10E-10"
"1477","WP_076159164","WP_076159164_1","WP_076159164_1","Amycolatopsis","Domain of unknown function (DUF1905)","PF08922.11","WP_076159164_1","Amycolatopsis coloradensis","6521","1","64.17","yes","MADNTPQAIDVTFTAEVIPDSNSGWPCVNMPDSAEFFGTGKAVKVSGTVDGHDYEASMLPIGGGVHMMPLRKPFRKVIQKEIGDKVTVHLTKRIS","WP_076159164_1","1.90E-22"
"1478","WP_089404560","WP_089404560_1","WP_089404560_1","Geodermatophilus","Domain of unknown function (DUF1905)","PF08922.11","WP_089404560_1","Geodermatophilus saharensis","2864","1","62.59","no","MDSLDTTFTAPLEKDGAFPTFVTVPGSAELFGTRKAVKVTGTVDGHSFSATCMPSGQGPHWLPLRKAVCAAIGKDAAGQEVTVHLQQRLS","WP_089404560_1","4.90E-24"
"1479","WP_110909804","WP_110909804_1","WP_110909804_1","Geodermatophilus","Domain of unknown function (DUF1905)","PF08922.11","WP_110909804_1","Geodermatophilus sp. DSM 44511","3821","1","57.37","no","MSPGGGRGQVTVTPQDIDASFTAPIEEDGAFATYLTVPGSAELFGTRRAVKVAGTVDGHAFTATCMPSGEGPHWLPLRKAICTAIGKDAAGQQVAVHLRQRLS","WP_110909804_1","1.60E-22"
"1480","PYG35723","PYG35723_3","PYG35723_3","Geodermatophilus","Domain of unknown function (DUF1905)","PF08922.11","PYG35723_3","Geodermatophilus sp. DSM 44511","7387","3","53.61","yes","MDERFRATLQKSPAPGGWTYLVWPESVRVFGTRGLVKVAGTVDGEPFRSSFMAMGDGTHKLPVAAGIRRTIGKQAGDEVEVHLLERITGGTAS","PYG35723_3","5.60E-29"
"1481","SFO01480","SFO01480_2","SFO01480_2","Geodermatophilus","Domain of unknown function (DUF1905)","PF08922.11","SFO01480_2","Geodermatophilus obscurus","3820","2","45.41","no","MSPARAPSLSAVTPQDIDASFTAPIEKDGAFATFVTVPGSAELFGTRRAVKVTGTVDGHEFAATCMPSGDGPHWLPLRKAVCAAIGKDAAGQEVAVHLRQRLS","SFO01480_2","9.90E-24"
"1482","WP_075012634","WP_075012634_2","WP_075012634_2","Geodermatophilus","Domain of unknown function (DUF1905)","PF08922.11","WP_075012634_2","Geodermatophilus obscurus","3820","2","45.41","no","MSPARAPSLSAVTPQDIDASFTAPIEKDGAFATFVTVPGSAELFGTRRAVKVTGTVDGHEFAATCMPSGDGPHWLPLRKAVCAAIGKDAAGQEVAVHLRQRLS","WP_075012634_2","9.90E-24"
"1483","SHF79230","SHF79230_1","SHF79230_1","Geodermatophilus","Domain of unknown function (DUF1905)","PF08922.11","SHF79230_1","Geodermatophilus nigrescens","4167","1","46.73","no","MAAQELDASFTAPLEKDGAFPTFVTVPDSAALFGTRRAVKVEGTVDGHPFAATCMPSGDGPHWLPLRKAICAAIGKDAAGQEVAVHLRQRLS","SHF79230_1","8.60E-24"
"1484","WP_073419543","WP_073419543_1","WP_073419543_1","Geodermatophilus","Domain of unknown function (DUF1905)","PF08922.11","WP_073419543_1","Geodermatophilus nigrescens","4167","1","46.73","no","MAAQELDASFTAPLEKDGAFPTFVTVPDSAALFGTRRAVKVEGTVDGHPFAATCMPSGDGPHWLPLRKAICAAIGKDAAGQEVAVHLRQRLS","WP_073419543_1","8.60E-24"
"1485","WP_093583210","WP_093583210_2","WP_093583210_2","Geodermatophilus","Domain of unknown function (DUF1905)","PF08922.11","WP_093583210_2","Geodermatophilus amargosae","3890","2","49.6","no","MSPAGACGLPTVTPQDIDASFTAPIEKDGAFATFVTVPGSAELFGTRRAVKVTGTVDGHDFAATCMPSGEGPHWLPLRKAVCSAIGKDRAGQEVTVHLRRRLS","WP_093583210_2","1.10E-23"
"1486","PYG35723","PYG35723_1","PYG35723_1","Geodermatophilus","Domain of unknown function (DUF1905)","PF08922.11","PYG35723_1","Geodermatophilus sp. DSM 44511","3821","1","57.37","no","MSPGGGRGQVTVTPQDIDASFTAPIEEDGAFATYLTVPGSAELFGTRRAVKVAGTVDGHAFTATCMPSGEGPHWLPLRKAICTAIGKDAAGQQVAVHLRQRLS","PYG35723_1","1.60E-22"
"1487","WP_108249502","WP_108249502_1","WP_108249502_1","Microbacteriaceae","none","none","WP_108249502_1","Microbacteriaceae bacterium 13S1-3","892","1","18.02","yes","MTLLTDTTPPVSPISVLDRPARPGQAEDDPFAFTIGYSGREDEIALGDITLCCSTTCSCSSSRKKQQ","WP_108249502_1","none"
"1488","KZC95159","KZC95159_2","KZC95159_2","Clavibacter","none","none","KZC95159_2","Clavibacter michiganensis subsp. tessellarius","954","2","32.11","yes","MTLLMEGPARTGASALAEAPTRVEEVDAARADALLAEAFGFTITHRGREAEVVMADVTLCCSTCCSCSSKQQPR","KZC95159_2","none"
"1489","WP_086517141","WP_086517141_2","WP_086517141_2","Clavibacter","none","none","WP_086517141_2","Clavibacter michiganensis","1018","2","42.25","yes","MTLLMEGPARTGASALAEAPTRVEEVDAARADALGADAFGADALLAEAFGFTITHRGREAEVVMADVTLCCSTCCSCSSKQQPR","WP_086517141_2","none"
"1490","OUE10317","OUE10317_2","OUE10317_2","Clavibacter","none","none","OUE10317_2","Clavibacter michiganensis","1000","2","30.21","yes","MTMLMEGPASTGASTLAEATTRVEEVDAARADALLAEAFGFTLTHRGREAEVVMADVTLCCSTCCSCSSKQQPR","OUE10317_2","none"
"1491","AWF97203","AWF97203_2","AWF97203_2","Clavibacter","none","none","AWF97203_2","Clavibacter michiganensis subsp. insidiosus","873","2","43.2","yes","MSLLMETAAPAALPTTAPEVAPAAGGDATSDALLAEAFGFTITHRGAEEEIVMGDVTLCCSTTCSSSGNGRQQQR","AWF97203_2","none"
"1492","WP_087197904","WP_087197904_2","WP_087197904_2","Clavibacter","none","none","WP_087197904_2","Clavibacter michiganensis subsp. michiganensis","919","2","34.57","yes","MSLLMEPTRTTAPEVAPAAGGEAASDALLAEAFGFTITHRGAEEELVMGDVTLCCSTTCSSSGSGHQQPR","WP_087197904_2","none"
"1493","WP_119402500","WP_119402500_1","WP_119402500_1","Clavibacter","none","none","WP_119402500_1","Clavibacter michiganensis","1024","1","43.28","yes","MTLLMEGTELTEGTELVGGTALADSSAARDGEVDAARADALLAEAFGFTITHRGREAEVVMADVTLCCSTCCSCSSQQKPR","WP_119402500_1","none"
"1494","WP_086515725","WP_086515725_2","WP_086515725_2","Clavibacter","none","none","WP_086515725_2","Clavibacter michiganensis","919","2","34.53","yes","MSLLMETAAPAPSRTTAPEVAPAAGGHETSDALLAEAFGFTITHRGAEEELVMGDVTLCCSTTCSSSGSGHQQPR","WP_086515725_2","none"
"1495","WP_104343881","WP_104343881_2","WP_104343881_2","Clavibacter","none","none","WP_104343881_2","Clavibacter michiganensis","1042","2","33.67","yes","MTMLMEGPVSTGASTLAEATTRVEEVDAARADALLAEAFGFTLTHRGREAEVVMADVTLCCSTCCSCSSKQQPR","WP_104343881_2","none"
"1496","OUE24647","OUE24647_2","OUE24647_2","Clavibacter","none","none","OUE24647_2","Clavibacter michiganensis","946","2","42.25","yes","MTLLMEGPARTGASALAEAPTRVEEVDAARADALGADAFGADALLAEAFGFTITHRGREAEVVMADVTLCCSTCCSCSSKQQPR","OUE24647_2","none"
"1497","WP_053775823","WP_053775823_2","WP_053775823_2","Clavibacter","none","none","WP_053775823_2","Clavibacter michiganensis subsp. capsici","922","2","33.39","yes","MSLLMETAAQAPSTTTAPGSAPGADDASDALLAEAFGFTITHRGAEEELVMGDVTLCCSTTCSSSGGGRQQPR","WP_053775823_2","none"
"1498","WP_043668521","WP_043668521_2","WP_043668521_2","Clavibacter","none","none","WP_043668521_2","Clavibacter michiganensis","921","2","35.38","yes","MSLLMETAAQAPSRTTAPGLAPGADDASDALLAEAFGFTITHRGAEEELVMGDVTLCCSTTCSSSGSGHQQPR","WP_043668521_2","none"
"1499","WP_100243842","WP_100243842_1","WP_100243842_1","Streptomyces","phosphotransferase system, EIIB","PF00367.20","WP_100243842_1","Streptomyces ipomoeae 91-03","6118","1","60.96","no","MATKAEKIVAGLGGLDNIEEIEGCITRLRTEVNDPSLVDEAALKAAGAHGVVKMGTAIQVVIGTDADPIAAEIEDMM","WP_100243842_1","1.50E-17"
"1500","WP_048819674","WP_048819674_1","WP_048819674_1","Streptomyces","phosphotransferase system, EIIB","PF00367.20","WP_048819674_1","Streptomyces ipomoeae","5049","1","60.96","no","MATKAEKIVAGLGGLDNIEEIEGCITRLRTEVNDPSLVDEAALKAAGAHGVVKMGTAIQVVIGTDADPIAAEIEDMM","WP_048819674_1","1.50E-17"
"1501","AFV25483","AFV25483_1","AFV25483_1","Streptomyces","phosphotransferase system, EIIB","PF00367.20","AFV25483_1","Streptomyces sp. BC16019","6960","1","63.18","no","MASKAEKIVAGLGGLDNIEEVEGCITRLRTEVHDASLVDEAALKAAGAHGVVKMGTAIQVVIGTDADPIAAEIEDMM","AFV25483_1","6.70E-18"
"1502","WP_020115555","WP_020115555_1","WP_020115555_1","Streptomyces","phosphotransferase system, EIIB","PF00367.20","WP_020115555_1","Streptomyces bottropensis ATCC 25435","6535","1","55.38","no","MASKAEKIVAGLGGLDNIEEVEGCITRLRTEVRDPALVDDAALKAAGAHGVVKMGTAIQVVIGTDADPIAAEIEDMM","WP_020115555_1","3.70E-17"
"1503","GAQ63669","GAQ63669_1","GAQ63669_1","Streptomyces","phosphotransferase system, EIIB","PF00367.20","GAQ63669_1","Streptomyces scabiei","6213","1","58.24","no","MASKAEKIVAGLGGLDNIEEVEGCITRLRTEVRDASLVDDAALKAAGAHGVVKMGTAIQVVIGTDADPIAAEIEDMM","GAQ63669_1","9.90E-18"
"1504","AFV25482","AFV25482_1","AFV25482_1","Streptomyces","phosphotransferase system, EIIB","PF00367.20","AFV25482_1","Streptomyces sp. BC16019","5543","1","63.18","no","MASKAEKIVAGLGGLDNIEEVEGCITRLRTEVHDASLVDEAALKAAGAHGVVKMGTAIQVVIGTDADPIAAEIEDMM","AFV25482_1","6.70E-18"
"1505","WP_059081288","WP_059081288_1","WP_059081288_1","Streptomyces","phosphotransferase system, EIIB","PF00367.20","WP_059081288_1","Streptomyces scabiei","6570","1","58.24","no","MASKAEKIVAGLGGLDNIEEVEGCITRLRTEVRDASLVDDAALKAAGAHGVVKMGTAIQVVIGTDADPIAAEIEDMM","WP_059081288_1","9.90E-18"
"1506","CBG72692","CBG72692_1","CBG72692_1","Streptomyces","phosphotransferase system, EIIB","PF00367.20","CBG72692_1","Streptomyces scabiei 87.22","6246","1","60.89","no","MASKAEKIVAGLGGLDNIEEVEGCITRLRTEVRDPSLVDDAALKAAGAHGVVKMGTAIQVVIGTDADPIAAEIEDMM","CBG72692_1","1.20E-17"
"1507","WP_005486705","WP_005486705_1","WP_005486705_1","Streptomyces","phosphotransferase system, EIIB","PF00367.20","WP_005486705_1","Streptomyces bottropensis ATCC 25435","5415","1","55.38","no","MASKAEKIVAGLGGLDNIEEVEGCITRLRTEVRDPALVDDAALKAAGAHGVVKMGTAIQVVIGTDADPIAAEIEDMM","WP_005486705_1","3.70E-17"
"1508","EMF50559","EMF50559_1","EMF50559_1","Streptomyces","phosphotransferase system, EIIB","PF00367.20","EMF50559_1","Streptomyces bottropensis ATCC 25435","6789","1","55.38","no","MASKAEKIVAGLGGLDNIEEVEGCITRLRTEVRDPALVDDAALKAAGAHGVVKMGTAIQVVIGTDADPIAAEIEDMM","EMF50559_1","3.70E-17"
"1509","EKX68557","EKX68557_1","EKX68557_1","Streptomyces","phosphotransferase system, EIIB","PF00367.20","EKX68557_1","Streptomyces ipomoeae 91-03","5013","1","60.96","no","MATKAEKIVAGLGGLDNIEEIEGCITRLRTEVNDPSLVDEAALKAAGAHGVVKMGTAIQVVIGTDADPIAAEIEDMM","EKX68557_1","1.50E-17"
"1510","WP_059081255","WP_059081255_1","WP_059081255_1","Streptomyces","phosphotransferase system, EIIB","PF00367.20","WP_059081255_1","Streptomyces scabiei","5114","1","58.24","no","MASKAEKIVAGLGGLDNIEEVEGCITRLRTEVRDASLVDDAALKAAGAHGVVKMGTAIQVVIGTDADPIAAEIEDMM","WP_059081255_1","9.90E-18"
"1511","EKX68554","EKX68554_1","EKX68554_1","Streptomyces","phosphotransferase system, EIIB","PF00367.20","EKX68554_1","Streptomyces ipomoeae 91-03","6391","1","60.96","no","MATKAEKIVAGLGGLDNIEEIEGCITRLRTEVNDPSLVDEAALKAAGAHGVVKMGTAIQVVIGTDADPIAAEIEDMM","EKX68554_1","1.50E-17"
"1512","WP_082822395","WP_082822395_2","WP_082822395_2","Mycobacterium","none","none","WP_082822395_2","Mycobacterium sp. QIA-37","103","2","20.47","yes","MSVQESVVDAHHDFVMDLFDDGLVPAMVMHDSAVKDPGGV","WP_082822395_2","none"
"1513","WP_100806338","WP_100806338_4","WP_100806338_4","Streptomyces","none","none","WP_100806338_4","Streptomyces sp. M56","91","4","37.43","yes","MYQQSPSARTRAVDPADFVAELHAEGNMPQNSGGDPAVPDSAFPDTHTYPLPVA","WP_100806338_4","none"
"1514","YP_008998156","YP_008998156_1","YP_008998156_1","Streptomyces","none","none","YP_008998156_1","Streptomyces sp. 14R-10","104","1","46.54","yes","MSQQFPSATTQAVDPADFVADLHAEGNMPQNSGGDPAVPDSAFPDTHTYPLPSA","YP_008998156_1","none"
"1515","WP_030794381","WP_030794381_3","WP_030794381_3","Streptomyces","none","none","WP_030794381_3","Streptomyces sp. NRRL S-920","103","3","47.84","yes","MSQQIPSATTQAVDPADFVVELHAEGNMPQNSGGDPAVPDSAFPDTHTYPLPSA","WP_030794381_3","none"
"1516","WP_100521517","WP_100521517_1","WP_100521517_1","Mycobacteroides","none","none","WP_100521517_1","Mycobacteroides abscessus subsp. abscessus","18","1","19.74","yes","MKGGDRMSVQESVVDVHHDFVMDLFDDGLVPAMVMHDSAVKDPGGV","WP_100521517_1","none"
"1517","WP_079611677","WP_079611677_1","WP_079611677_1","Mycobacteroides","none","none","WP_079611677_1","Mycobacteroides abscessus subsp. bolletii","106","1","18.01","yes","MSVQESVVDVHHDFVMDLFDDGLVPAMVMHDSAVKDPGGV","WP_079611677_1","none"
"1518","WP_084521174","WP_084521174_1","WP_084521174_1","Nocardia","none","none","WP_084521174_1","Nocardia uniformis NBRC 13702","63","1","31.36","yes","MPKHIDTKAPADDADVHDFVMDLFNEGLVPAIVMHDSAVPDFVG","WP_084521174_1","none"
"1519","WP_055633699","WP_055633699_1","WP_055633699_1","Streptomyces","none","none","WP_055633699_1","Streptomyces griseoruber","99","1","39.07","yes","MPVSQSVTAAVPADPADFIADLHADGAMPQNSGGDPAVPDSAFPDTHTYTVPAV","WP_055633699_1","none"
"1520","WP_033309246","WP_033309246_1","WP_033309246_1","Streptomyces","none","none","WP_033309246_1","Streptomyces iakyrus","106","1","34.46","yes","MAPQVTKSATTQAFDPADFITELHSEGRLPQNAGGDPAVPDSAFPDTTTYEISV","WP_033309246_1","none"
"1521","WP_121801511","WP_121801511_3","WP_121801511_3","Streptomyces","none","none","WP_121801511_3","Streptomyces griseocarneus","103","3","34.52","yes","MPTIEPATNAAVDPADFISALHAEGNLPQNAGGDPAVPDSCFIDTHIYQQPTV","WP_121801511_3","none"
"1522","WP_114626704","WP_114626704_1","WP_114626704_1","Streptomyces","none","none","WP_114626704_1","Streptomyces sp. AC230","91","1","40.0","yes","MSQQIPSATTQAVDPADFVADLHAEGNMPQNSGGDPAVPDSAFPDTHTYPLPSARRP","WP_114626704_1","none"
"1523","WP_015663091","WP_015663091_1","WP_015663091_1","Streptomyces","none","none","WP_015663091_1","Streptomyces davaonensis JCM 4913","98","1","42.43","yes","MPVPVTTVVLADPADFIGELHADGAMPQNSGGDPAVPDSAFPDTHTYPVLV","WP_015663091_1","none"
"1524","WP_019885858","WP_019885858_2","WP_019885858_2","Streptomyces","none","none","WP_019885858_2","Streptomyces purpureus KA281","94","2","48.83","yes","MAPQIEATTKAVDPAEFVAELHAEGNLPQNTGGDPAVPDSAFPDTHTYEHPAV","WP_019885858_2","none"
"1525","WP_079099227","WP_079099227_1","WP_079099227_1","Mycobacterium","none","none","WP_079099227_1","Mycobacterium tuberculosis","7034","1","24.88","yes","MAGYVVEYNRRTHVRRITEFATPQEAMEHRLKLEAERTDSNIEIVALVSKSLGTLKQTHSRYFTGEELNVGNGAR","WP_079099227_1","none"
"1526","COV92604","COV92604_1","COV92604_1","Mycobacterium","none","none","COV92604_1","Mycobacterium tuberculosis","7071","1","29.42","yes","MAGYVVEYNRRTHVRRITEFATPQEAMEHRLKLEAERTDSNIEIVALVSKSLGTLKQTHSRYFTGEELNVGNGAR","COV92604_1","none"
"1527","CFS33831","CFS33831_1","CFS33831_1","Mycobacterium","none","none","CFS33831_1","Mycobacterium tuberculosis","7034","1","24.88","yes","MAGYVVEYNRRTHVRRITEFATPQEAMEHRLKLEAERTDSNIEIVALVSKSLGTLKQTHSRYFTGEELNVGNGAR","CFS33831_1","none"
"1528","EFD73056","EFD73056_2","EFD73056_2","Mycobacterium","none","none","EFD73056_2","Mycobacterium tuberculosis GM 1503","7040","2","24.88","yes","MAGYVVEYNRRTHVRRITEFATPQEAMEHRLKLEAERTDSNIEIVALVSKSLGTLKQTHSRYFTGEELNVGNGAR","EFD73056_2","none"
"1529","CKX97298","CKX97298_1","CKX97298_1","Mycobacterium","none","none","CKX97298_1","Mycobacterium tuberculosis","7033","1","24.88","yes","MAGYVVEYNRRTHVRRITEFATPQEAMEHRLKLEAERTDSNIEIVALVSKSLGTLKQTHSRYFTGEELNVGNGAR","CKX97298_1","none"
"1530","EGB29232","EGB29232_1","EGB29232_1","Mycobacterium","none","none","EGB29232_1","Mycobacterium tuberculosis CDC1551A","7096","1","24.88","yes","MAGYVVEYNRRTHVRRITEFATPQEAMEHRLKLEAERTDSNIEIVALVSKSLGTLKQTHSRYFTGEELNVGNGAR","EGB29232_1","none"
"1531","COV81994","COV81994_1","COV81994_1","Mycobacterium","none","none","COV81994_1","Mycobacterium tuberculosis","7183","1","24.88","yes","MAGYVVEYNRRTHVRRITEFATPQEAMEHRLKLEAERTDSNIEIVALVSKSLGTLKQTHSRYFTGEELNVGNGAR","COV81994_1","none"
"1532","AKR01079","AKR01079_1","AKR01079_1","Mycobacterium","none","none","AKR01079_1","Mycobacterium tuberculosis variant bovis","7134","1","24.88","yes","MAGYVVEYNRRTHVRRITEFATPQEAMEHRLKLEAERTDSNIEIVALVSKSLGTLKQTHSRYFTGEELNVGNGAR","AKR01079_1","none"
"1533","WP_031737334","WP_031737334_1","WP_031737334_1","Mycobacterium","none","none","WP_031737334_1","Mycobacterium tuberculosis 1755BN","7033","1","24.88","yes","MAGYVVEYNRRTHVRRITEFATPQEAMEHRLKLEAERTDSNIEIVALVSKSLGTLKQTHSRYFTGEELNVGNGAR","WP_031737334_1","none"
"1534","COV23412","COV23412_1","COV23412_1","Mycobacterium","none","none","COV23412_1","Mycobacterium tuberculosis","7033","1","24.88","yes","MAGYVVEYNRRTHVRRITEFATPQEAMEHRLKLEAERTDSNIEIVALVSKSLGTLKQTHSRYFTGEELNVGNGAR","COV23412_1","none"
"1535","WP_075911259","WP_075911259_1","WP_075911259_1","Mycobacterium","none","none","WP_075911259_1","Mycobacterium tuberculosis","7033","1","24.88","yes","MAGYVVEYNRRTHVRRITEFATPQEAMEHRLKLEAERTDSNIEIVALVSKSLGTLKQTHSRYFTGEELNVGNGAR","WP_075911259_1","none"
"1536","WP_086155057","WP_086155057_1","WP_086155057_1","Mycobacterium","none","none","WP_086155057_1","Mycobacterium tuberculosis","7033","1","24.88","yes","MAGYVVEYNRRTHVRRITEFATPQEAMEHRLKLEAERTDSNIEIVALVSKSLGTLKQTHSRYFTGEELNVGNGAR","WP_086155057_1","none"
"1537","SGD85762","SGD85762_1","SGD85762_1","Mycobacterium","none","none","SGD85762_1","Mycobacterium tuberculosis","7034","1","24.88","yes","MAGYVVEYNRRTHVRRITEFATPQEAMEHRLKLEAERTDSNIEIVALVSKSLGTLKQTHSRYFTGEELNVGNGAR","SGD85762_1","none"
"1538","OOK64193","OOK64193_1","OOK64193_1","Mycobacterium","none","none","OOK64193_1","Mycobacterium kansasii","2888","1","18.99","no","MTIDPDQIRSEIEALVAQLPDVADAENGPSLAELEVIARRLSEAHDVLLRALESAEKG","OOK64193_1","none"
"1539","EPQ80131","EPQ80131_3","EPQ80131_3","Mycobacterium","none","none","EPQ80131_3","Mycobacterium marinum str. Europe","3119","3","2.08","no","MTIDPDQIRTEIESLLAQLPEVADGANGPSLAELEDIARRLSEAHDVLLQALESAEKG","EPQ80131_3","none"
"1540","RUP01435","RUP01435_3","RUP01435_3","Mycobacterium","none","none","RUP01435_3","Mycobacterium sp.","3271","3","29.84","no","MTIDPEQIRAEIESLVAQLPDNADAATGPSLEELEDIARRLSEAHDVLLRALESAEKG","RUP01435_3","none"
"1541","WP_085249702","WP_085249702_3","WP_085249702_3","Mycobacterium","none","none","WP_085249702_3","Mycobacterium riyadhense","3328","3","15.97","no","MTIDPDQIRAEIEALLAQLPDPGGNPADSANGPSLAELEDIARRLSEAHDVLLAALESAEKG","WP_085249702_3","none"
"1542","WP_086085423","WP_086085423_2","WP_086085423_2","Mycobacterium","none","none","WP_086085423_2","Mycobacterium pseudoshottsii JCM 15466","2962","2","0.78","no","MTIDPDQIRTEIESLLAQLPEVADGANGPSLAELEDIARRLSEAHDVLLQALESAEKG","WP_086085423_2","none"
"1543","ORC04413","ORC04413_2","ORC04413_2","Mycobacterium","none","none","ORC04413_2","Mycobacterium persicum","2874","2","16.39","no","MTIDPDQIRSEIEALVAQLPDVDDAENGPSLAELEVIARRLSEAHDVLLRALESAEKG","ORC04413_2","none"
"1544","WP_036403339","WP_036403339_3","WP_036403339_3","Mycobacterium","none","none","WP_036403339_3","Mycobacterium kansasii 732","2870","3","16.26","no","MTIDPDQIRSEIEALVAQLPDVADAENGPSLAELEDIARRLSEAHDVLLRALESAEKG","WP_036403339_3","none"
"1545","WP_055578070","WP_055578070_2","WP_055578070_2","Mycobacterium","none","none","WP_055578070_2","Mycobacterium gordonae","5068","2","36.44","no","MTIDPEQIRAEIESLVAQLPDNADAGTGPSLEELEDIARRLSEAHDVLLQALESAEKG","WP_055578070_2","none"
"1546","WP_122442751","WP_122442751_2","WP_122442751_2","Mycobacterium","none","none","WP_122442751_2","Mycobacterium attenuatum","2703","2","24.69","no","MTIDPDQIRSEIEALVAQLPDVADAENGPSLAELEDIARRLSEAHDVLLRALESAEKG","WP_122442751_2","none"
"1547","WP_075510821","WP_075510821_2","WP_075510821_2","Mycobacterium","none","none","WP_075510821_2","Mycobacterium kansasii","2930","2","15.31","no","MTIDPDQIRSEIEALVAQLPDVADAENGPSLAELEDIARRLSEAHDVLLRALESAEKG","WP_075510821_2","none"
"1548","WP_065164254","WP_065164254_1","WP_065164254_1","Mycobacterium","none","none","WP_065164254_1","Mycobacterium gordonae","7537","1","27.7","no","MTIDPEQIRAEIQSLMAQLPDNADAATGPSLEELEDIARRLSEAHDVLLQALESAEKG","WP_065164254_1","none"
"1549","WP_083046415","WP_083046415_1","WP_083046415_1","Mycobacterium","none","none","WP_083046415_1","Mycobacterium shinjukuense","2804","1","17.87","no","MTIDPDQIRAEIEALLAELPDPATLQADAENGPSLAELEDIARRLSEAHDVLLAALESVEKG","WP_083046415_1","none"
"1550","WP_085160326","WP_085160326_1","WP_085160326_1","Mycobacterium","none","none","WP_085160326_1","Mycobacterium lacus","3423","1","13.35","no","MTIDPEQIRAEIESLLAQLPDTADPENLADGPSLAELEEIARRLSEAHDVLLAALDSAEKG","WP_085160326_1","none"
"1551","WP_085673955","WP_085673955_1","WP_085673955_1","Mycobacterium","none","none","WP_085673955_1","Mycobacterium szulgai","6089","1","19.56","no","MTIDPDEIRAEIESLLAQLPEVTDGENGPSLAELEDIARRLSEAHDVLLAALESAEKG","WP_085673955_1","none"
"1552","WP_024818115","WP_024818115_4","WP_024818115_4","Arthrobacter","Positive regulator of sigma(E), RseC/MucC","PF04246.12","WP_024818115_4","Arthrobacter sp. 31Y","3847","4","12.42","yes","MNRSPLVWLFLALVLGTYAVSIFVSDSDQTWWSVLSGIIIAAASLLTLWRFGREVRKNRQP","WP_024818115_4","4.60E-08"
"1553","AFR30485","AFR30485_4","AFR30485_4","Arthrobacter","Phage holin family Hol44, in holin superfamily V","PF16079.5","AFR30485_4","Arthrobacter sp. Rue61a","3871","4","14.91","yes","MNRIPLTWLFLALVLGAYAVSIFISNQDQTWWSTASGIILAAASLVMFWKFSRELRNNRQP","AFR30485_4","5.30E-06"
"1554","WP_128397239","WP_128397239_4","WP_128397239_4","Paenarthrobacter","Domain of unknown function (DUF4131)","PF13567.6","WP_128397239_4","Paenarthrobacter ureafaciens","3816","4","12.34","yes","MNHRSLVWLMLALLLGAYAVYALFSNQSGSVWPLLTGVICSLGALGALWRSREEARADRE","WP_128397239_4","4.30E-07"
"1555","WP_062097999","WP_062097999_4","WP_062097999_4","Arthrobacter","Domain of unknown function (DUF4131)","PF13567.6","WP_062097999_4","Arthrobacter sp. ATCC 21022","3816","4","12.34","yes","MNHRSLVWLMLALLLGAYAVYALFSNQSGSVWPLLTGVICSLGALGALWRSREEARADRE","WP_062097999_4","4.30E-07"
"1556","AOY69839","AOY69839_4","AOY69839_4","Arthrobacter","Domain of unknown function (DUF4131)","PF13567.6","AOY69839_4","Arthrobacter sp. ZXY-2","3823","4","9.65","yes","MNHTSLVWLMLALLLGAYAVYALFSNQSGSVWPLLTGVICSLGALGALWRSREEARADRE","AOY69839_4","3.50E-07"
"1557","WP_031216848","WP_031216848_4","WP_031216848_4","Arthrobacter","Domain of unknown function (DUF4131)","PF13567.6","WP_031216848_4","Arthrobacter sp. ZXY-2","3823","4","9.65","yes","MNHTSLVWLMLALLLGAYAVYALFSNQSGSVWPLLTGVICSLGALGALWRSREEARADRE","WP_031216848_4","3.50E-07"
"1558","WP_043470682","WP_043470682_4","WP_043470682_4","Arthrobacter","Phage holin family Hol44, in holin superfamily V","PF16079.5","WP_043470682_4","Arthrobacter sp. Rue61a","3871","4","14.91","yes","MNRIPLTWLFLALVLGAYAVSIFISNQDQTWWSTASGIILAAASLVMFWKFSRELRNNRQP","WP_043470682_4","5.30E-06"
"1559","WP_028265499","WP_028265499_5","WP_028265499_5","Arthrobacter","none","none","WP_028265499_5","Arthrobacter sp. MA-N2","3880","5","14.64","yes","MKSNSIIWLLLALIFGFYSVYIFSTIRDDSPWGIVSGVALVAGSLVSLGKFVRDAKASKVDRNG","WP_028265499_5","none"
"1560","WP_062071474","WP_062071474_4","WP_062071474_4","Arthrobacter","Positive regulator of sigma(E), RseC/MucC","PF04246.12","WP_062071474_4","Arthrobacter sp. EpRS71","3848","4","11.32","yes","MNRSPLVWLFLALVLGAYAVSIFVSDSDQTWWSILSGIVIAAASVMTLWRFVREVRKNRQP","WP_062071474_4","2.60E-07"
"1561","SCZ59071","SCZ59071_4","SCZ59071_4","Arthrobacter","Positive regulator of sigma(E), RseC/MucC","PF04246.12","SCZ59071_4","Arthrobacter sp. UNCCL28","3853","4","20.05","yes","MNRKPLIWLLLALVLAAYSVSIFVTGTGQSPWSVLSGVIIGAASLVMVWKYSREIRNNRPS","SCZ59071_4","1.90E-07"
"1562","WP_091470208","WP_091470208_4","WP_091470208_4","Arthrobacter","Sulfite exporter TauE/SafE","PF01925.19","WP_091470208_4","Arthrobacter sp. HG","3921","4","9.86","yes","MNTKPLVWLLLALTLAAYAVSIFISNRGESVWSTVSGVIMVVAALVMFWRYLQGRRAGQNEQ","WP_091470208_4","3.40E-06"
"1563","WP_089596247","WP_089596247_4","WP_089596247_4","Arthrobacter","Positive regulator of sigma(E), RseC/MucC","PF04246.12","WP_089596247_4","Arthrobacter sp. YN","3831","4","22.53","yes","MNRKPLIWLLLALVLAAYAVSIFVSNPGQSPWSMITGIIMSAASVVMVWRYSWEIRNNRPS","WP_089596247_4","5.10E-06"
"1564","WP_105691909","WP_105691909_4","WP_105691909_4","Arthrobacter","Sulfite exporter TauE/SafE","PF01925.19","WP_105691909_4","Arthrobacter sp. MYb51","3848","4","18.8","yes","MNRSPLVWLFLALVLGTYAVSIFVSDSDQTWWSILSGIIIAAASLLTLWRFGREVRKNRQP","WP_105691909_4","5.50E-06"
"1565","WP_026542026","WP_026542026_4","WP_026542026_4","Paenarthrobacter","Positive regulator of sigma(E), RseC/MucC","PF04246.12","WP_026542026_4","Paenarthrobacter nicotinovorans 231Sha2.1M6","3849","4","17.89","yes","MNRKPLIWLLLALVLAAYSASIFVTGPGQSPWSVLSGVIIGAASLVMVWKYSREIRNNRPS","WP_026542026_4","7.10E-07"
"1566","WP_075814930","WP_075814930_1","WP_075814930_1","Serinicoccus","none","none","WP_075814930_1","Serinicoccus sp. CUA-874","4","1","8.26","yes","MACAGYEWCAVLEDDEEMIGVAELKAGEPA","WP_075814930_1","none"
"1567","WP_017589866","WP_017589866_5","WP_017589866_5","Nocardiopsis","none","none","WP_017589866_5","Nocardiopsis ganjiahuensis DSM 45031","3","5","11.12","yes","MACASLMMSSPIDPTEDITPAVEELDEESAE","WP_017589866_5","none"
"1568","WP_073704754","WP_073704754_3","WP_073704754_3","Nocardiopsis","none","none","WP_073704754_3","Nocardiopsis sp. TSRI0078","2","3","24.34","yes","MACAGYEWTVPLENADDIAPAVEELDEETAE","WP_073704754_3","none"
"1569","WP_121183327","WP_121183327_2","WP_121183327_2","Nocardiopsis","none","none","WP_121183327_2","Nocardiopsis sp. Huas11","3","2","17.05","yes","MACASLMMSSPIDPTDDVTPAVEELDEETAE","WP_121183327_2","none"
"1570","PSK95408","PSK95408_1","PSK95408_1","Murinocardiopsis","none","none","PSK95408_1","Murinocardiopsis flavida","14","1","23.95","yes","MACAGYDLTVSLDHVDAVELDVEELDEETVREPVAAV","PSK95408_1","none"
"1571","WP_053619387","WP_053619387_2","WP_053619387_2","Nocardiopsis","none","none","WP_053619387_2","Nocardiopsis sp. NRRL B-16309","2","2","20.04","yes","MPEIGIPQHGGHSAAFIRTVKESNMACASLMMSSPIDPADDVAPAVEELDEETAE","WP_053619387_2","none"
"1572","WP_075924874","WP_075924874_2","WP_075924874_2","Nocardiopsis","none","none","WP_075924874_2","Nocardiopsis sp. CNR-923","2","2","18.47","yes","MACAGYDWAAPLEPTEDITMAVEELDENTAE","WP_075924874_2","none"
[truncated: 243,027 more chars]
