# Supplementary material for: Discovery and characterisation of an amidine-containing ribosomally-synthesised peptide that is widely distributed in nature
Source: Royal Society of Chemistry journal article supplement (doi:10.1039/d1sc01456k), 2021-01-01
Supplement: d1sc01456k2.cys [file d1sc01456k2.cys › CytoscapeSession-2019_12_19-13_30/tables/52-cc_1.to.494.txt/HIDDEN-org.cytoscape.model.CyNetwork-52+hidden+network.cytable]

"CyCSV-Version","1"
"SUID","__layoutAlgorithm"
"java.lang.Long","java.lang.String"
"","mutable"
"52 hidden network",""
"52","force-directed"
