# Supplementary material for: Discovery and characterisation of an amidine-containing ribosomally-synthesised peptide that is widely distributed in nature
Source: Royal Society of Chemistry journal article supplement (doi:10.1039/d1sc01456k), 2021-01-01
Supplement: d1sc01456k2.cys [file d1sc01456k2.cys › CytoscapeSession-2019_12_19-13_30/tables/52-cc_1.to.494.txt/LOCAL_ATTRS-org.cytoscape.model.CyEdge-cc_1.to.494.txt+default+edge.cytable]

CyCSV-Version	1
SUID	interaction	name	selected
java.lang.Long	java.lang.String	java.lang.String	java.lang.Boolean
cc_1.to.494.txt default edge
2554	pp	PWF27333_2 (pp) WP_133246044_2	false
2555	pp	SEC29390_2 (pp) WP_066215709_2	false
2556	pp	PDQ36095_3 (pp) PDQ36093_4	false
2557	pp	WP_104181080_3 (pp) WP_105032337_3	false
2558	pp	WP_107778339_3 (pp) WP_107778338_3	false
2559	pp	COV81994_2 (pp) AGL26862_1	false
2560	pp	WP_090039557_6 (pp) WP_083091741_1	false
2561	pp	WP_073452776_1 (pp) WP_017177815_2	false
2562	pp	WP_084580442_1 (pp) REH37226_1	false
2563	pp	WP_103341360_1 (pp) WP_131735418_1	false
2564	pp	WP_131785730_4 (pp) WP_131785729_4	false
2565	pp	WP_123601959_4 (pp) WP_123601960_4	false
2566	pp	WP_053619387_1 (pp) WP_121183327_1	false
2567	pp	WP_095563712_3 (pp) WP_095563712_2	false
2568	pp	OKH95170_3 (pp) WP_073785992_3	false
2569	pp	WP_126382826_3 (pp) WP_126382827_4	false
2570	pp	WP_083609312_2 (pp) OKI12399_2	false
2571	pp	WP_121405200_3 (pp) WP_100045344_3	false
2572	pp	AXK36692_2 (pp) AXK36690_3	false
2573	pp	WP_116026136_1 (pp) WP_116026137_1	false
2574	pp	WP_111334328_1 (pp) PKV33869_5	false
2575	pp	WP_085670625_1 (pp) WP_083113299_2	false
2576	pp	WP_075410821_2 (pp) WP_081384789_3	false
2577	pp	WP_035849420_7 (pp) WP_035849418_4	false
2578	pp	RED74809_3 (pp) WP_116154877_3	false
2579	pp	WP_018962008_5 (pp) WP_018962008_8	false
2580	pp	WP_065164254_4 (pp) WP_061921822_1	false
2581	pp	WP_125807935_1 (pp) RSM56874_1	false
2582	pp	WP_111862863_1 (pp) WP_111862862_1	false
2583	pp	WP_086858376_4 (pp) WP_086858376_3	false
2584	pp	WP_076045700_1 (pp) WP_060180042_2	false
2585	pp	WP_081707409_1 (pp) ERK54887_1	false
2586	pp	WP_097165202_2 (pp) WP_104263679_3	false
2587	pp	WP_040899039_1 (pp) EJJ05688_1	false
2588	pp	WP_079180155_3 (pp) SGI74060_3	false
2589	pp	WP_082115066_2 (pp) KJK44488_2	false
2590	pp	WP_053729790_4 (pp) WP_053729792_4	false
2591	pp	OJV24808_1 (pp) OJV24806_2	false
2592	pp	WP_116154877_2 (pp) RED74809_2	false
2593	pp	WP_091674323_2 (pp) SFB39971_2	false
2594	pp	KZE98020_3 (pp) WP_045196822_3	false
2595	pp	AFJ68075_2 (pp) WP_067908345_2	false
2596	pp	WP_054046275_1 (pp) EWC60518_2	false
2597	pp	WP_094002561_2 (pp) WP_116110588_2	false
2598	pp	WP_059082757_1 (pp) GAQ65395_1	false
2599	pp	WP_054049769_2 (pp) WP_091371144_1	false
2600	pp	WP_053729792_3 (pp) WP_053729790_3	false
2601	pp	WP_083753877_1 (pp) ONI75210_1	false
2602	pp	WP_042407643_4 (pp) WP_042407643_3	false
2603	pp	WP_027737671_1 (pp) WP_027737668_1	false
2604	pp	WP_086461443_2 (pp) WP_086461444_2	false
2605	pp	WP_080564860_3 (pp) WP_083982727_2	false
2606	pp	KPI20077_2 (pp) WP_054213495_2	false
2607	pp	WP_054569301_1 (pp) WP_018637157_1	false
2608	pp	WP_090039557_3 (pp) WP_064110435_3	false
2609	pp	WP_082320087_1 (pp) EPJ34556_2	false
2610	pp	WP_082115066_1 (pp) KJK44488_1	false
2611	pp	OXL32905_1 (pp) WP_089507734_1	false
2612	pp	WP_081323045_1 (pp) KTR94659_1	false
2613	pp	EFL12569_1 (pp) WP_078561279_1	false
2614	pp	SFD04819_1 (pp) WP_028567914_2	false
2615	pp	WP_097276114_3 (pp) SDE31545_3	false
2616	pp	OKL50794_1 (pp) WP_124913393_2	false
2617	pp	WP_098744376_1 (pp) SBT66104_1	false
2618	pp	EEZ91469_3 (pp) WP_004017479_2	false
2619	pp	WP_107004474_2 (pp) WP_066216109_1	false
2620	pp	WP_086513413_2 (pp) WP_086513414_2	false
2621	pp	WP_123603612_3 (pp) WP_033342998_1	false
2622	pp	WP_084011357_3 (pp) WP_045877303_3	false
2623	pp	WP_051751858_2 (pp) WP_131736173_1	false
2624	pp	WP_121394015_3 (pp) WP_092779820_3	false
2625	pp	RPF24868_1 (pp) WP_123971014_1	false
2626	pp	WP_064282747_1 (pp) KKF03247_1	false
2627	pp	WP_081907113_2 (pp) WP_073387576_3	false
2628	pp	EXG81129_3 (pp) WP_035861760_3	false
2629	pp	WP_073785992_1 (pp) OKH95170_1	false
2630	pp	WP_111209344_2 (pp) SBN62121_1	false
2631	pp	WP_009951067_1 (pp) CAM04239_1	false
2632	pp	SDN00667_1 (pp) WP_090014707_1	false
2633	pp	WP_101557151_2 (pp) WP_101557149_2	false
2634	pp	EFF80328_2 (pp) WP_082163142_2	false
2635	pp	AKJ11407_3 (pp) AKJ11412_3	false
2636	pp	WP_094931980_1 (pp) WP_124799873_2	false
2637	pp	RKS80725_2 (pp) WP_121191582_2	false
2638	pp	WP_049566251_1 (pp) WP_100806338_1	false
2639	pp	WP_091040567_4 (pp) SDE51953_3	false
2640	pp	WP_122198059_2 (pp) WP_117355837_2	false
2641	pp	WP_079611677_2 (pp) WP_100521517_2	false
2642	pp	WP_083597719_1 (pp) SFO39709_1	false
2643	pp	WP_124441159_1 (pp) GCB48186_1	false
2644	pp	WP_084580442_2 (pp) EWM17971_1	false
2645	pp	WP_040899039_2 (pp) EJJ05688_2	false
2646	pp	WP_126382826_1 (pp) WP_126382827_1	false
2647	pp	WP_052396081_2 (pp) EWM18075_2	false
2648	pp	ORC04864_2 (pp) WP_082275447_3	false
2649	pp	WP_071129084_3 (pp) WP_122819575_2	false
2650	pp	EWM18075_1 (pp) WP_052396081_1	false
2651	pp	WP_059190156_1 (pp) WP_097276114_1	false
2652	pp	WP_083715654_1 (pp) ONF71727_1	false
2653	pp	WP_030172142_1 (pp) WP_030172139_1	false
2654	pp	WP_092779820_2 (pp) WP_121394015_2	false
2655	pp	WP_092533827_1 (pp) WP_067908345_1	false
2656	pp	WP_086861034_2 (pp) WP_079054543_2	false
2657	pp	WP_091159224_2 (pp) SDY68794_2	false
2658	pp	SEC38602_1 (pp) WP_126898321_1	false
2659	pp	SIK72068_5 (pp) WP_083019015_3	false
2660	pp	WP_123601959_3 (pp) WP_123601960_3	false
2661	pp	WP_083597223_2 (pp) SFN21853_3	false
2662	pp	WP_093544729_3 (pp) SCD31130_3	false
2663	pp	PDQ36093_6 (pp) PDQ36095_5	false
2664	pp	WP_084692311_7 (pp) WP_084692314_5	false
2665	pp	WP_079182634_2 (pp) OKI46856_2	false
2666	pp	WP_120571834_2 (pp) WP_120571833_2	false
2667	pp	OJH69022_1 (pp) WP_030288747_1	false
2668	pp	WP_053729792_1 (pp) WP_053729790_1	false
2669	pp	WP_058846818_2 (pp) WP_037658204_2	false
2670	pp	WP_083191919_6 (pp) KOG82578_7	false
2671	pp	SDN00667_3 (pp) WP_090014707_3	false
2672	pp	WP_084692311_5 (pp) WP_084692314_3	false
2673	pp	PDQ36093_2 (pp) PDQ36095_1	false
2674	pp	KLO64220_3 (pp) WP_082128669_1	false
2675	pp	WP_052129072_2 (pp) WP_080754833_2	false
2676	pp	WP_084523472_2 (pp) WP_067823333_3	false
2677	pp	WP_054213495_1 (pp) KPI20077_1	false
2678	pp	WP_110911190_4 (pp) WP_111209344_3	false
2679	pp	PKV30436_1 (pp) WP_101368245_1	false
2680	pp	OJV25031_3 (pp) OJV25031_2	false
2681	pp	WP_111166051_3 (pp) WP_067972339_3	false
2682	pp	SDQ22037_1 (pp) WP_092862843_1	false
2683	pp	WP_090014707_4 (pp) SDN00667_4	false
2684	pp	OLB80605_4 (pp) WP_116200011_3	false
2685	pp	WP_123601959_1 (pp) WP_123601960_1	false
2686	pp	WP_040887728_3 (pp) EMF02011_3	false
2687	pp	WP_130451801_2 (pp) WP_123074529_2	false
2688	pp	WP_052499830_2 (pp) WP_062760655_3	false
2689	pp	WP_119286192_3 (pp) WP_030578068_2	false
2690	pp	WP_078561279_3 (pp) EFL12569_2	false
2691	pp	PZS01282_1 (pp) WP_134128179_1	false
2692	pp	WP_037862255_1 (pp) WP_063758854_1	false
2693	pp	WP_131102102_1 (pp) QBI53056_1	false
2694	pp	WP_119835460_1 (pp) WP_120205519_1	false
2695	pp	WP_084415931_3 (pp) AND16936_3	false
2696	pp	WP_129587643_3 (pp) WP_080654621_1	false
2697	pp	SEH00212_2 (pp) WP_084415984_1	false
2698	pp	WP_112443292_2 (pp) WP_071934999_1	false
2699	pp	WP_012086849_1 (pp) WP_023550873_2	false
2700	pp	WP_018962008_4 (pp) WP_018962008_7	false
2701	pp	WP_078515914_2 (pp) WP_028427539_3	false
2702	pp	WP_090039557_2 (pp) WP_064110435_2	false
2703	pp	RKT76768_1 (pp) WP_121030237_1	false
2704	pp	WP_092862843_2 (pp) SDQ22037_2	false
2705	pp	WP_083715657_1 (pp) ONF71729_1	false
2706	pp	RKT36058_3 (pp) WP_121148667_2	false
2707	pp	WP_116110588_1 (pp) WP_094002561_1	false
2708	pp	KIE24863_3 (pp) WP_052318929_2	false
2709	pp	SDR04557_1 (pp) WP_093264055_1	false
2710	pp	SFN21853_1 (pp) WP_083597223_1	false
2711	pp	SEE89807_2 (pp) WP_089774243_3	false
2712	pp	OPF84252_1 (pp) WP_078841030_1	false
2713	pp	KOG82578_6 (pp) KOU46944_4	false
2714	pp	WP_091114658_2 (pp) WP_093583210_5	false
2715	pp	PDQ36095_2 (pp) PDQ36093_3	false
2716	pp	SDG90099_2 (pp) WP_091067169_3	false
2717	pp	WP_017177815_1 (pp) WP_073452776_2	false
2718	pp	WP_031027146_3 (pp) KPC95547_3	false
2719	pp	OKJ94941_1 (pp) WP_084902797_2	false
2720	pp	WP_083982727_1 (pp) WP_114029352_1	false
2721	pp	WP_123971014_4 (pp) RPF24868_3	false
2722	pp	WP_030578068_1 (pp) WP_119286192_2	false
2723	pp	PDQ36099_2 (pp) PDQ36095_4	false
2724	pp	KJK44488_3 (pp) WP_082115066_3	false
2725	pp	QBI53056_9001 (pp) WP_131102102_9001	false
2726	pp	WP_081453250_2 (pp) ACZ89043_2	false
2727	pp	SBT66104_2 (pp) WP_098744376_2	false
2728	pp	OKL53160_3 (pp) WP_083603298_3	false
2729	pp	OUE29607_1 (pp) OUE29606_1	false
2730	pp	WP_052038751_3 (pp) WP_076002756_3	false
2731	pp	KHK96352_2 (pp) WP_082008308_2	false
2732	pp	EXG81129_2 (pp) WP_035861760_2	false
2733	pp	WP_080968710_2 (pp) KMT47190_5	false
2734	pp	WP_091073170_1 (pp) SEQ04975_1	false
2735	pp	WP_116708219_2 (pp) WP_133828511_2	false
2736	pp	WP_071042996_5 (pp) WP_071042994_4	false
2737	pp	WP_107308000_2 (pp) WP_033309246_2	false
2738	pp	ONF71729_2 (pp) WP_083715657_2	false
2739	pp	OIJ88146_5 (pp) WP_079177123_5	false
2740	pp	WP_084580442_3 (pp) EWM17971_2	false
2741	pp	WP_090073899_1 (pp) WP_082373216_1	false
2742	pp	OXL32905_2 (pp) WP_089507734_2	false
2743	pp	WP_052311581_1 (pp) AEV84085_1	false
2744	pp	WP_117401160_1 (pp) WP_117401161_1	false
2745	pp	BAM28031_2 (pp) WP_087454409_2	false
2746	pp	GCB48186_2 (pp) WP_124441159_2	false
2747	pp	ROS76630_1 (pp) WP_123307848_1	false
2748	pp	EWC60518_1 (pp) WP_075973981_1	false
2749	pp	WP_131785729_2 (pp) WP_131785730_2	false
2750	pp	WP_083115866_1 (pp) ORA12704_1	false
2751	pp	PWK29583_3 (pp) WP_093610459_2	false
2752	pp	WP_073704754_2 (pp) WP_077692191_1	false
2753	pp	WP_107778339_1 (pp) WP_107778338_1	false
2754	pp	WP_040887728_2 (pp) EMF02011_2	false
2755	pp	WP_058846818_1 (pp) WP_037658204_1	false
2756	pp	WP_082163142_3 (pp) EFF80328_3	false
2757	pp	OUE27579_3 (pp) OUE27580_3	false
2758	pp	SEH00212_3 (pp) SEH00207_9005	false
2759	pp	WP_132186408_3 (pp) WP_132186409_3	false
2760	pp	OJH69022_5 (pp) WP_030288747_5	false
2761	pp	SDR04557_2 (pp) WP_093264055_2	false
2762	pp	RED74809_8 (pp) WP_116154877_8	false
2763	pp	AEB46035_1 (pp) WP_081476164_1	false
2764	pp	WP_076002756_2 (pp) WP_020759490_1	false
2765	pp	WP_080564860_1 (pp) ERS23150_3	false
2766	pp	OLF11310_1 (pp) OLF11310_2	false
2767	pp	WP_093357236_1 (pp) SFO40826_2	false
2768	pp	WP_051268851_4 (pp) WP_026407791_2	false
2769	pp	CDM77002_1 (pp) AGC62644_2	false
2770	pp	WP_082057091_3 (pp) AJT41785_3	false
2771	pp	WP_086845754_1 (pp) WP_038682890_1	false
2772	pp	RKT54190_1 (pp) WP_121005579_1	false
2773	pp	SGI74060_2 (pp) WP_079180155_2	false
2774	pp	WP_028441277_3 (pp) WP_007495061_3	false
2775	pp	WP_091073170_2 (pp) SEQ04975_2	false
2776	pp	KLO64220_5 (pp) WP_082128669_3	false
2777	pp	WP_134664144_4 (pp) WP_112443341_1	false
2778	pp	KOV37396_1 (pp) WP_107094495_1	false
2779	pp	WP_057611617_1 (pp) WP_057611617_2	false
2780	pp	WP_035849420_8 (pp) WP_035849418_5	false
2781	pp	WP_079177123_2 (pp) OIJ88146_2	false
2782	pp	WP_045196822_1 (pp) KZE98020_1	false
2783	pp	WP_081384789_2 (pp) WP_075410821_1	false
2784	pp	WP_133246044_1 (pp) PWF27333_1	false
2785	pp	ROS45991_3 (pp) WP_123292376_3	false
2786	pp	WP_116154877_4 (pp) RED74809_4	false
2787	pp	WP_093603934_1 (pp) SFR28131_1	false
2788	pp	SDL22458_2 (pp) WP_091051455_2	false
2789	pp	KOG82578_5 (pp) WP_083191919_4	false
2790	pp	OFK71393_3 (pp) WP_083296694_2	false
2791	pp	WP_071042996_2 (pp) WP_071042994_2	false
2792	pp	WP_083752781_1 (pp) ONI88739_1	false
2793	pp	OOC53575_2 (pp) WP_077689962_2	false
2794	pp	WP_079177123_6 (pp) OIJ88146_6	false
2795	pp	CAM04239_5 (pp) WP_009951067_4	false
2796	pp	OKH95170_2 (pp) WP_073785992_2	false
2797	pp	PYE15898_2 (pp) WP_110470681_2	false
2798	pp	WP_089774243_2 (pp) SEE89807_1	false
2799	pp	WP_088261769_2 (pp) WP_088290452_2	false
2800	pp	WP_110050419_5 (pp) WP_017545560_2	false
2801	pp	WP_066216109_3 (pp) WP_107004474_3	false
2802	pp	RKT76768_3 (pp) WP_121030237_3	false
2803	pp	WP_095563712_4 (pp) WP_073387576_1	false
2804	pp	WP_083752781_2 (pp) ONI88739_2	false
2805	pp	WP_053676554_1 (pp) WP_094009173_1	false
2806	pp	WP_084692314_2 (pp) WP_084692311_4	false
2807	pp	WP_123292376_1 (pp) ROS45991_1	false
2808	pp	OJV25031_1 (pp) OJV24806_1	false
2809	pp	CCB71037_2 (pp) WP_078590495_2	false
2810	pp	WP_009951067_3 (pp) CAM04239_4	false
2811	pp	WP_122198059_3 (pp) WP_062760655_1	false
2812	pp	WP_082008308_1 (pp) KHK96352_1	false
2813	pp	WP_116026136_2 (pp) WP_116026137_2	false
2814	pp	WP_083603298_1 (pp) OKL53160_1	false
2815	pp	WP_029068734_3 (pp) WP_053775070_1	false
2816	pp	EGY78124_2 (pp) ERS23150_2	false
2817	pp	WP_128397239_5 (pp) WP_062097999_5	false
2818	pp	WP_101557149_3 (pp) WP_101557151_3	false
2819	pp	KOG82578_2 (pp) WP_083191919_2	false
2820	pp	WP_051458214_3 (pp) WP_046468711_1	false
2821	pp	WP_111166051_1 (pp) WP_067972339_1	false
2822	pp	WP_082508744_2 (pp) KQR47999_2	false
2823	pp	ORA12704_2 (pp) WP_083115866_2	false
2824	pp	PJJ46026_1 (pp) WP_100302197_1	false
2825	pp	WP_063274437_2 (pp) WP_112443292_6	false
2826	pp	WP_117355837_1 (pp) WP_122198059_1	false
2827	pp	WP_076825825_2 (pp) WP_091273394_4	false
2828	pp	WP_078841030_3 (pp) OPF84252_3	false
2829	pp	ANS70161_3 (pp) AXG59058_3	false
2830	pp	RKT76768_2 (pp) WP_121030237_2	false
2831	pp	WP_081453250_3 (pp) ACZ89043_4	false
2832	pp	WP_132170147_1 (pp) WP_132170149_1	false
2833	pp	OJV24806_3 (pp) OJV24808_3	false
2834	pp	RED74809_7 (pp) WP_116154877_7	false
2835	pp	PJJ46026_2 (pp) WP_100302197_2	false
2836	pp	WP_104181080_2 (pp) WP_105032337_2	false
2837	pp	PDQ36469_2 (pp) WP_125614105_1	false
2838	pp	WP_130875440_1 (pp) WP_061787443_4	false
2839	pp	WP_017568553_3 (pp) WP_017568552_3	false
2840	pp	WP_096168585_3 (pp) WP_135448567_2	false
2841	pp	WP_131965734_3 (pp) WP_131965735_4	false
2842	pp	CCB71037_1 (pp) WP_078590495_1	false
2843	pp	WP_084692314_4 (pp) WP_084692311_6	false
2844	pp	WP_079182634_3 (pp) OKI46856_3	false
2845	pp	WP_048316860_2 (pp) WP_048317341_2	false
2846	pp	WP_035861760_1 (pp) EXG81129_1	false
2847	pp	SEG99236_1 (pp) WP_103960548_1	false
2848	pp	WP_116708219_1 (pp) WP_133828511_1	false
2849	pp	WP_034253534_4 (pp) EGQ75425_4	false
2850	pp	EMF02011_4 (pp) WP_040887728_4	false
2851	pp	KJK44488_5 (pp) WP_082115066_4	false
2852	pp	SGI74060_1 (pp) WP_079180155_1	false
2853	pp	SMF78969_1 (pp) WP_085213387_1	false
2854	pp	WP_073876556_3 (pp) RLV71217_2	false
2855	pp	WP_064833209_2 (pp) OBA55656_3	false
2856	pp	WP_093544729_1 (pp) SCD31130_1	false
2857	pp	RUP01435_5 (pp) WP_055578070_5	false
2858	pp	WP_017559667_3 (pp) ROS45991_2	false
2859	pp	WP_131965734_2 (pp) WP_131965735_3	false
2860	pp	WP_100861846_2 (pp) WP_051777853_1	false
2861	pp	WP_082248115_3 (pp) WP_080684945_1	false
2862	pp	WP_082248115_3 (pp) OQM68597_3	false
2863	pp	WP_080684945_1 (pp) OQM68597_3	false
2864	pp	WP_080909324_1 (pp) WP_124566915_1	false
2865	pp	WP_080909324_1 (pp) WP_075831737_1	false
2866	pp	WP_075831737_1 (pp) WP_124566915_1	false
2867	pp	SDL97273_3 (pp) WP_091216389_3	false
2868	pp	WP_030701973_2 (pp) WP_091216389_3	false
2869	pp	WP_030701973_2 (pp) SDL97273_3	false
2870	pp	WP_054213495_3 (pp) KPI20077_3	false
2871	pp	WP_119105432_2 (pp) KPI20077_3	false
2872	pp	WP_119105432_2 (pp) WP_054213495_3	false
2873	pp	WP_051338384_1 (pp) WP_106674009_1	false
2874	pp	WP_106674009_1 (pp) WP_125314889_1	false
2875	pp	SCG59471_1 (pp) REF98980_2	false
2876	pp	WP_053652832_3 (pp) REF98980_2	false
2877	pp	WP_053652832_3 (pp) SCG59471_1	false
2878	pp	SDE51953_4 (pp) WP_069774196_3	false
2879	pp	WP_091040567_5 (pp) WP_069774196_3	false
2880	pp	WP_091040567_5 (pp) SDE51953_4	false
2881	pp	WP_116154877_6 (pp) RED74809_6	false
2882	pp	PKV33869_6 (pp) WP_116154877_6	false
2883	pp	PKV33869_6 (pp) RED74809_6	false
2884	pp	WP_043591397_2 (pp) WP_108913844_2	false
2885	pp	WP_076804070_2 (pp) WP_043591397_2	false
2886	pp	WP_076804070_2 (pp) WP_108913844_2	false
2887	pp	WP_107120384_3 (pp) KUN25245_3	false
2888	pp	WP_059193363_3 (pp) WP_107120384_3	false
2889	pp	WP_059193363_3 (pp) KUN25245_3	false
2890	pp	WP_081900771_1 (pp) SDM16976_1	false
2891	pp	WP_086828879_1 (pp) WP_081900771_1	false
2892	pp	WP_086828879_1 (pp) SDM16976_1	false
2893	pp	WP_083715654_5 (pp) ONF71727_5	false
2894	pp	WP_083715654_5 (pp) WP_072028150_2	false
2895	pp	WP_072028150_2 (pp) ONF71727_5	false
2896	pp	WP_076843254_2 (pp) WP_076843253_2	false
2897	pp	KLL12571_3 (pp) WP_076843253_2	false
2898	pp	KLL12571_3 (pp) WP_076843254_2	false
2899	pp	WP_127571148_1 (pp) EFF80328_1	false
2900	pp	WP_082163142_1 (pp) WP_127571148_1	false
2901	pp	WP_082163142_1 (pp) EFF80328_1	false
2902	pp	EWM64891_1 (pp) WP_082931047_1	false
2903	pp	WP_083296959_1 (pp) EWM64891_1	false
2904	pp	WP_083296959_1 (pp) WP_082931047_1	false
2905	pp	WP_083296959_3 (pp) WP_082931047_3	false
2906	pp	WP_083296959_3 (pp) EWM64891_3	false
2907	pp	EWM64891_3 (pp) WP_082931047_3	false
2908	pp	WP_099279259_5 (pp) WP_134664144_5	false
2909	pp	WP_134664144_7 (pp) WP_099279259_5	false
2910	pp	WP_134664144_7 (pp) WP_134664144_5	false
2911	pp	WP_098695120_3 (pp) WP_082871442_2	false
2912	pp	WP_098695120_3 (pp) KZM72684_2	false
2913	pp	KZM72684_2 (pp) WP_082871442_2	false
2914	pp	WP_093170892_5 (pp) SDH11838_5	false
2915	pp	WP_093170943_3 (pp) SDH11838_5	false
2916	pp	WP_093170943_3 (pp) WP_093170892_5	false
2917	pp	WP_131103335_2 (pp) WP_082128669_2	false
2918	pp	WP_131103335_2 (pp) KLO64220_4	false
2919	pp	WP_082128669_2 (pp) KLO64220_4	false
2920	pp	WP_082931047_2 (pp) EWM64891_2	false
2921	pp	WP_083296959_2 (pp) EWM64891_2	false
2922	pp	WP_083296959_2 (pp) WP_082931047_2	false
2923	pp	WP_125547276_1 (pp) CUM40551_5	false
2924	pp	WP_079037558_6 (pp) WP_125547276_1	false
2925	pp	WP_079037558_6 (pp) CUM40551_5	false
2926	pp	SDE51953_1 (pp) WP_091040567_2	false
2927	pp	WP_082822395_1 (pp) SDE51953_1	false
2928	pp	WP_082822395_1 (pp) WP_091040567_2	false
2929	pp	WP_093170943_1 (pp) WP_093170892_2	false
2930	pp	SDH11838_2 (pp) WP_093170892_2	false
2931	pp	SDH11838_2 (pp) WP_093170943_1	false
2932	pp	WP_132619812_2 (pp) CAM04239_3	false
2933	pp	WP_132619812_2 (pp) WP_009951067_2	false
2934	pp	CAM04239_3 (pp) WP_009951067_2	false
2935	pp	WP_052318929_1 (pp) AKJ13608_3	false
2936	pp	KIE24863_1 (pp) WP_052318929_1	false
2937	pp	KIE24863_1 (pp) AKJ13608_3	false
2938	pp	SFK92414_3 (pp) WP_125792333_4	false
2939	pp	SFK92414_3 (pp) WP_093601012_1	false
2940	pp	WP_130490932_1 (pp) WP_129176857_3	false
2941	pp	WP_053775070_2 (pp) WP_129176857_3	false
2942	pp	WP_070795263_3 (pp) WP_088246551_3	false
2943	pp	OMO45941_2 (pp) WP_070795263_3	false
2944	pp	OMO45941_2 (pp) WP_088246551_3	false
2945	pp	WP_007536321_2 (pp) EME16460_2	false
2946	pp	WP_043809367_2 (pp) EME16460_2	false
2947	pp	WP_043809367_2 (pp) WP_007536321_2	false
2948	pp	WP_110565442_9001 (pp) WP_074475319_9003	false
2949	pp	WP_110565442_9001 (pp) WP_091614694_9002	false
2950	pp	WP_091614694_9002 (pp) WP_074475319_9003	false
2951	pp	WP_061300719_1 (pp) WP_061300720_1	false
2952	pp	WP_061300719_1 (pp) WP_061300721_1	false
2953	pp	WP_061300721_1 (pp) WP_061300720_1	false
2954	pp	WP_092888237_1 (pp) WP_135971800_3	false
2955	pp	WP_092888237_1 (pp) WP_092888237_3	false
2956	pp	WP_135971800_3 (pp) WP_092888237_3	false
2957	pp	WP_092807119_3 (pp) WP_091247291_2	false
2958	pp	SCX58064_3 (pp) WP_092807119_3	false
2959	pp	SCX58064_3 (pp) WP_091247291_2	false
2960	pp	SFI84698_2 (pp) ACZ89043_3	false
2961	pp	SFI84698_2 (pp) WP_081937495_2	false
2962	pp	WP_081937495_2 (pp) ACZ89043_3	false
2963	pp	WP_044386624_1 (pp) WP_130329265_1	false
2964	pp	WP_116150435_1 (pp) WP_130329265_1	false
2965	pp	WP_116150435_1 (pp) WP_044386624_1	false
2966	pp	RKS80725_1 (pp) WP_121191582_1	false
2967	pp	WP_007495061_1 (pp) RKS80725_1	false
2968	pp	WP_007495061_1 (pp) WP_121191582_1	false
2969	pp	ESU58068_3 (pp) WP_046096646_3	false
2970	pp	ESU58068_3 (pp) WP_087454414_3	false
2971	pp	WP_087454414_3 (pp) WP_046096646_3	false
2972	pp	WP_079051299_1 (pp) KUM76187_1	false
2973	pp	AFJ68075_1 (pp) KUM76187_1	false
2974	pp	AFJ68075_1 (pp) WP_079051299_1	false
2975	pp	SDG32337_1 (pp) SDL74859_1	false
2976	pp	SDG32337_1 (pp) WP_090009591_1	false
2977	pp	SDL74859_1 (pp) WP_090009591_1	false
2978	pp	WP_083603298_2 (pp) OKL53160_2	false
2979	pp	WP_083603298_2 (pp) WP_082248115_2	false
2980	pp	WP_082248115_2 (pp) OKL53160_2	false
2981	pp	WP_066217216_1 (pp) WP_082724316_1	false
2982	pp	SEB29931_3 (pp) WP_066217216_1	false
2983	pp	SEB29931_3 (pp) WP_082724316_1	false
2984	pp	AXG59058_1 (pp) WP_079164984_1	false
2985	pp	AXG59058_1 (pp) ANS70161_1	false
2986	pp	ANS70161_1 (pp) WP_079164984_1	false
2987	pp	WP_083597719_2 (pp) SFO39709_2	false
2988	pp	WP_083597719_2 (pp) WP_101786715_1	false
2989	pp	SFO39709_2 (pp) WP_101786715_1	false
2990	pp	KUN25245_4 (pp) WP_059193363_4	false
2991	pp	WP_107120384_4 (pp) KUN25245_4	false
2992	pp	WP_107120384_4 (pp) WP_059193363_4	false
2993	pp	RKT36058_2 (pp) WP_058623611_1	false
2994	pp	WP_121148667_1 (pp) RKT36058_2	false
2995	pp	WP_121148667_1 (pp) WP_058623611_1	false
2996	pp	WP_051816122_1 (pp) WP_111506795_3	false
2997	pp	WP_125499925_1 (pp) WP_051816122_1	false
2998	pp	WP_125499925_1 (pp) WP_111506795_3	false
2999	pp	WP_083318853_2 (pp) WP_083304061_2	false
3000	pp	WP_083318853_2 (pp) OFL66352_2	false
3001	pp	OFL66352_2 (pp) WP_083304061_2	false
3002	pp	WP_030269598_1 (pp) WP_057232473_1	false
3003	pp	WP_030269598_1 (pp) WP_128378882_1	false
3004	pp	KUN25245_2 (pp) WP_107120384_2	false
3005	pp	KUN25245_2 (pp) WP_059193363_2	false
3006	pp	WP_059193363_2 (pp) WP_107120384_2	false
3007	pp	RPK69291_1 (pp) WP_124271723_1	false
3008	pp	RPK69291_1 (pp) WP_116209352_1	false
3009	pp	WP_116209352_1 (pp) WP_124271723_1	false
3010	pp	OIJ88146_4 (pp) WP_023554016_1	false
3011	pp	OIJ88146_4 (pp) WP_079177123_4	false
3012	pp	WP_079177123_4 (pp) WP_023554016_1	false
3013	pp	AGC62644_1 (pp) CDM77002_2	false
3014	pp	WP_020787304_1 (pp) AGC62644_1	false
3015	pp	WP_020787304_1 (pp) CDM77002_2	false
3016	pp	WP_030877129_2 (pp) WP_082871442_1	false
3017	pp	KZM72684_1 (pp) WP_030877129_2	false
3018	pp	KZM72684_1 (pp) WP_082871442_1	false
3019	pp	WP_067972339_5 (pp) WP_078971081_3	false
3020	pp	WP_067972339_5 (pp) KPC62607_3	false
3021	pp	WP_078971081_3 (pp) KPC62607_3	false
3022	pp	SER15522_1 (pp) SMC91639_1	false
3023	pp	SER15522_1 (pp) WP_089952439_1	false
3024	pp	WP_089952439_1 (pp) SMC91639_1	false
3025	pp	WP_055553439_1 (pp) AKJ13608_5	false
3026	pp	WP_037862255_2 (pp) AKJ13608_5	false
3027	pp	WP_037862255_2 (pp) WP_055553439_1	false
3028	pp	WP_006143940_1 (pp) WP_100806338_2	false
3029	pp	WP_126890470_1 (pp) WP_006143940_1	false
3030	pp	WP_126890470_1 (pp) WP_100806338_2	false
3031	pp	WP_104181080_1 (pp) WP_105032337_1	false
3032	pp	WP_104181080_1 (pp) WP_098514311_1	false
3033	pp	WP_105032337_1 (pp) WP_098514311_1	false
3034	pp	PJJ39560_4 (pp) WP_100302786_4	false
3035	pp	PJJ39560_4 (pp) WP_078564093_4	false
3036	pp	WP_078564093_4 (pp) WP_100302786_4	false
3037	pp	WP_094009173_4 (pp) WP_057608322_3	false
3038	pp	WP_094009173_4 (pp) WP_123074529_4	false
3039	pp	WP_101557149_1 (pp) WP_101557151_1	false
3040	pp	WP_116200011_2 (pp) WP_101557151_1	false
3041	pp	WP_116200011_2 (pp) WP_101557149_1	false
3042	pp	WP_061409829_2 (pp) WP_075142776_2	false
3043	pp	WP_061409829_2 (pp) AFK17249_2	false
3044	pp	AFK17249_2 (pp) WP_075142776_2	false
3045	pp	WP_078561279_4 (pp) EFL12569_3	false
3046	pp	WP_078561279_4 (pp) WP_014690715_1	false
3047	pp	EFL12569_3 (pp) WP_014690715_1	false
3048	pp	WP_071042996_1 (pp) WP_104167780_1	false
3049	pp	WP_071042996_1 (pp) WP_071042994_1	false
3050	pp	WP_071042994_1 (pp) WP_104167780_1	false
3051	pp	WP_113979657_5 (pp) ANN17130_2	false
3052	pp	WP_103341360_2 (pp) ANN17130_2	false
3053	pp	WP_111209344_1 (pp) SBN62121_2	false
3054	pp	WP_111209344_1 (pp) WP_110911190_2	false
3055	pp	SBN62121_2 (pp) WP_110911190_2	false
3056	pp	WP_070739770_2 (pp) WP_070739770_4	false
3057	pp	WP_070739770_3 (pp) WP_070739770_2	false
3058	pp	WP_070739770_3 (pp) WP_070739770_4	false
3059	pp	WP_131626375_2 (pp) WP_082057091_2	false
3060	pp	AJT41785_2 (pp) WP_082057091_2	false
3061	pp	AJT41785_2 (pp) WP_131626375_2	false
3062	pp	WP_054567598_3 (pp) WP_076824657_3	false
3063	pp	WP_054567598_3 (pp) WP_091272827_2	false
3064	pp	WP_054567598_3 (pp) WP_091272829_2	false
3065	pp	WP_091272827_2 (pp) WP_091272829_2	false
3066	pp	WP_076824657_3 (pp) WP_091272827_2	false
3067	pp	WP_076824657_3 (pp) WP_091272829_2	false
3068	pp	SIR58548_3 (pp) WP_111167565_5	false
3069	pp	SIR58548_3 (pp) WP_049570352_6	false
3070	pp	WP_113985589_4 (pp) SIR58548_3	false
3071	pp	WP_113985589_4 (pp) WP_111167565_5	false
3072	pp	WP_113985589_4 (pp) WP_049570352_6	false
3073	pp	WP_049570352_6 (pp) WP_111167565_5	false
3074	pp	WP_075012634_3 (pp) WP_093583210_4	false
3075	pp	WP_075012634_3 (pp) SFO01480_4	false
3076	pp	WP_075012634_3 (pp) WP_089404560_4	false
3077	pp	WP_093583210_4 (pp) SFO01480_4	false
3078	pp	WP_093583210_4 (pp) WP_089404560_4	false
3079	pp	WP_089404560_4 (pp) SFO01480_4	false
3080	pp	WP_061300623_4 (pp) WP_062440803_4	false
3081	pp	WP_061300623_4 (pp) WP_066366076_4	false
3082	pp	WP_061300623_4 (pp) WP_062349267_3	false
3083	pp	WP_066366076_4 (pp) WP_062349267_3	false
3084	pp	WP_062440803_4 (pp) WP_062349267_3	false
3085	pp	WP_062440803_4 (pp) WP_066366076_4	false
3086	pp	WP_088986452_1 (pp) SCE72235_1	false
3087	pp	WP_088986452_1 (pp) SCE72260_1	false
3088	pp	WP_088986452_1 (pp) WP_088991224_1	false
3089	pp	SCE72235_1 (pp) SCE72260_1	false
3090	pp	WP_088991224_1 (pp) SCE72235_1	false
3091	pp	WP_088991224_1 (pp) SCE72260_1	false
3092	pp	WP_017568552_2 (pp) WP_121185217_1	false
3093	pp	WP_017568553_2 (pp) WP_017568552_2	false
3094	pp	WP_017568553_2 (pp) WP_121185217_1	false
3095	pp	WP_121185218_2 (pp) WP_017568552_2	false
3096	pp	WP_121185218_2 (pp) WP_121185217_1	false
3097	pp	WP_121185218_2 (pp) WP_017568553_2	false
3098	pp	WP_089156471_1 (pp) WP_015663091_5	false
3099	pp	WP_089156471_1 (pp) WP_084902797_1	false
3100	pp	WP_015663091_5 (pp) WP_084902797_1	false
3101	pp	WP_125813086_6 (pp) WP_015663091_5	false
3102	pp	WP_125813086_6 (pp) WP_084902797_1	false
3103	pp	WP_033306993_1 (pp) WP_029068734_1	false
3104	pp	WP_033306993_1 (pp) WP_081655210_1	false
3105	pp	WP_033306993_1 (pp) WP_034274384_1	false
3106	pp	WP_034274384_1 (pp) WP_029068734_1	false
3107	pp	WP_081655210_1 (pp) WP_029068734_1	false
3108	pp	WP_081655210_1 (pp) WP_034274384_1	false
3109	pp	WP_093655900_1 (pp) WP_085014622_1	false
3110	pp	WP_093655900_1 (pp) WP_093849541_4	false
3111	pp	WP_093655900_1 (pp) WP_085014620_1	false
3112	pp	WP_085014622_1 (pp) WP_093849541_4	false
3113	pp	WP_085014620_1 (pp) WP_085014622_1	false
3114	pp	WP_085014620_1 (pp) WP_093849541_4	false
3115	pp	WP_131883639_1 (pp) WP_132175704_1	false
3116	pp	WP_135231520_1 (pp) WP_131883639_1	false
3117	pp	WP_135231520_1 (pp) WP_132175704_1	false
3118	pp	WP_131965720_1 (pp) WP_131883639_1	false
3119	pp	WP_131965720_1 (pp) WP_135231520_1	false
3120	pp	WP_131965720_1 (pp) WP_132175704_1	false
3121	pp	KOG82578_1 (pp) WP_083191919_1	false
3122	pp	SDE31545_1 (pp) KOG82578_1	false
3123	pp	SDE31545_1 (pp) WP_083191919_1	false
3124	pp	KOU46944_1 (pp) KOG82578_1	false
3125	pp	KOU46944_1 (pp) WP_083191919_1	false
3126	pp	KOU46944_1 (pp) SDE31545_1	false
3127	pp	WP_091051455_1 (pp) WP_104181080_4	false
3128	pp	WP_091051455_1 (pp) SDL22458_1	false
3129	pp	WP_091051455_1 (pp) WP_105032337_4	false
3130	pp	WP_105032337_4 (pp) SDL22458_1	false
3131	pp	WP_104181080_4 (pp) WP_105032337_4	false
3132	pp	WP_104181080_4 (pp) SDL22458_1	false
3133	pp	SCL44965_4 (pp) WP_091094891_2	false
3134	pp	SCL44965_4 (pp) WP_067972339_2	false
3135	pp	SCL44965_4 (pp) WP_111166051_2	false
3136	pp	WP_111166051_2 (pp) WP_091094891_2	false
3137	pp	WP_067972339_2 (pp) WP_091094891_2	false
3138	pp	WP_067972339_2 (pp) WP_111166051_2	false
3139	pp	WP_132268317_3 (pp) WP_132268319_3	false
3140	pp	WP_132268317_3 (pp) WP_132388266_4	false
3141	pp	WP_132268317_3 (pp) WP_132388264_4	false
3142	pp	WP_132388264_4 (pp) WP_132388266_4	false
3143	pp	WP_132388264_4 (pp) WP_132268319_3	false
3144	pp	WP_132268319_3 (pp) WP_132388266_4	false
3145	pp	KHK96352_4 (pp) WP_082008308_3	false
3146	pp	KHK96352_4 (pp) WP_083982727_3	false
3147	pp	WP_082008308_3 (pp) WP_083982727_3	false
3148	pp	WP_083982727_4 (pp) WP_083982727_3	false
3149	pp	WP_017568552_1 (pp) WP_017568553_1	false
3150	pp	WP_017568552_1 (pp) WP_028427539_1	false
3151	pp	WP_017568552_1 (pp) WP_078515914_1	false
3152	pp	WP_078515914_1 (pp) WP_017568553_1	false
3153	pp	WP_028427539_1 (pp) WP_017568553_1	false
3154	pp	WP_028427539_1 (pp) WP_078515914_1	false
3155	pp	WP_018657395_3 (pp) WP_132172132_2	false
3156	pp	WP_018657395_3 (pp) WP_091460541_1	false
3157	pp	WP_132172132_2 (pp) WP_121801511_6	false
3158	pp	WP_132388264_3 (pp) WP_132388266_3	false
3159	pp	WP_132388264_3 (pp) WP_132186409_2	false
3160	pp	WP_132388264_3 (pp) WP_132186408_2	false
3161	pp	WP_132186408_2 (pp) WP_132388266_3	false
3162	pp	WP_132186408_2 (pp) WP_132186409_2	false
3163	pp	WP_132388266_3 (pp) WP_132186409_2	false
3164	pp	AXK36690_2 (pp) WP_027737668_2	false
3165	pp	AXK36690_2 (pp) AXK36692_1	false
3166	pp	WP_027737668_2 (pp) AXK36692_1	false
3167	pp	WP_027737671_2 (pp) AXK36690_2	false
3168	pp	WP_027737671_2 (pp) WP_027737668_2	false
3169	pp	WP_027737671_2 (pp) AXK36692_1	false
3170	pp	WP_031012255_4 (pp) WP_107442966_6	false
3171	pp	WP_031012255_4 (pp) WP_057576508_4	false
3172	pp	WP_031012255_4 (pp) WP_078909294_8	false
3173	pp	WP_057576508_4 (pp) WP_107442966_6	false
3174	pp	WP_078909294_8 (pp) WP_107442966_6	false
3175	pp	WP_078909294_8 (pp) WP_057576508_4	false
3176	pp	WP_091553165_2 (pp) SCX58064_2	false
3177	pp	WP_091553165_2 (pp) WP_091067169_2	false
3178	pp	WP_091553165_2 (pp) WP_092807119_2	false
3179	pp	WP_091067169_2 (pp) SCX58064_2	false
3180	pp	WP_092807119_2 (pp) SCX58064_2	false
3181	pp	WP_092807119_2 (pp) WP_091067169_2	false
3182	pp	OUE27579_2 (pp) WP_086513413_3	false
3183	pp	OUE27579_2 (pp) WP_086513414_3	false
3184	pp	OUE27579_2 (pp) OUE27580_2	false
3185	pp	WP_086513414_3 (pp) OUE27580_2	false
3186	pp	WP_086513413_3 (pp) WP_086513414_3	false
3187	pp	WP_086513413_3 (pp) OUE27580_2	false
3188	pp	WP_123601959_2 (pp) WP_120571834_1	false
3189	pp	WP_123601960_2 (pp) WP_120571834_1	false
3190	pp	WP_123601960_2 (pp) WP_123601959_2	false
3191	pp	WP_120571833_1 (pp) WP_120571834_1	false
3192	pp	WP_120571833_1 (pp) WP_123601959_2	false
3193	pp	WP_120571833_1 (pp) WP_123601960_2	false
3194	pp	WP_107657165_1 (pp) WP_132175704_2	false
3195	pp	WP_107657165_1 (pp) WP_135231520_2	false
3196	pp	WP_131965720_2 (pp) WP_132175704_2	false
3197	pp	WP_131965720_2 (pp) WP_135231520_2	false
3198	pp	WP_131965720_2 (pp) WP_107657165_1	false
3199	pp	WP_135231520_2 (pp) WP_132175704_2	false
3200	pp	KDN17331_1 (pp) WP_067592598_1	false
3201	pp	KDN17331_1 (pp) WP_084093827_1	false
3202	pp	KDN17331_1 (pp) WP_116200011_1	false
3203	pp	WP_067592598_1 (pp) WP_084093827_1	false
3204	pp	WP_067592598_1 (pp) WP_116200011_1	false
3205	pp	WP_084093827_1 (pp) WP_116200011_1	false
3206	pp	OMC50887_1 (pp) OMC41183_1	false
3207	pp	OMC50887_1 (pp) WP_083679341_1	false
3208	pp	OMC50887_1 (pp) WP_083667099_1	false
3209	pp	WP_083679341_1 (pp) OMC41183_1	false
3210	pp	WP_083667099_1 (pp) OMC41183_1	false
3211	pp	WP_083667099_1 (pp) WP_083679341_1	false
3212	pp	WP_091040567_3 (pp) SDE51953_2	false
3213	pp	WP_091040567_3 (pp) SDL22458_3	false
3214	pp	WP_091040567_3 (pp) WP_091051455_3	false
3215	pp	WP_091051455_3 (pp) SDE51953_2	false
3216	pp	WP_091051455_3 (pp) SDL22458_3	false
3217	pp	SDE51953_2 (pp) SDL22458_3	false
3218	pp	SDE31545_5 (pp) WP_083191919_5	false
3219	pp	SDE31545_5 (pp) KOG82578_3	false
3220	pp	KOU46944_2 (pp) WP_083191919_5	false
3221	pp	KOU46944_2 (pp) SDE31545_5	false
3222	pp	KOU46944_2 (pp) KOG82578_3	false
3223	pp	KOG82578_3 (pp) WP_083191919_5	false
3224	pp	SDY68794_1 (pp) WP_091216389_1	false
3225	pp	SDY68794_1 (pp) SDL97273_1	false
3226	pp	SDL97273_1 (pp) WP_091216389_1	false
3227	pp	WP_091159224_1 (pp) SDY68794_1	false
3228	pp	WP_091159224_1 (pp) WP_091216389_1	false
3229	pp	WP_091159224_1 (pp) SDL97273_1	false
3230	pp	WP_084211656_1 (pp) ODU05661_1	false
3231	pp	WP_084211656_1 (pp) ALE82507_1	false
3232	pp	WP_084211656_1 (pp) WP_132047282_3	false
3233	pp	ODU05661_1 (pp) ALE82507_1	false
3234	pp	WP_132047282_3 (pp) ODU05661_1	false
3235	pp	WP_132047282_3 (pp) ALE82507_1	false
3236	pp	WP_026174640_2 (pp) WP_082057091_1	false
3237	pp	WP_026174640_2 (pp) AJT41785_1	false
3238	pp	SEB29931_2 (pp) AJT41785_1	false
3239	pp	SEC29390_3 (pp) SEB29931_2	false
3240	pp	SEC29390_3 (pp) AJT41785_1	false
3241	pp	WP_082057091_1 (pp) SEB29931_2	false
3242	pp	WP_082057091_1 (pp) AJT41785_1	false
3243	pp	WP_082057091_1 (pp) SEC29390_3	false
3244	pp	WP_091289566_1 (pp) WP_091674323_1	false
3245	pp	WP_091289566_1 (pp) SFB39971_1	false
3246	pp	WP_091289566_1 (pp) WP_091289566_2	false
3247	pp	WP_091289566_1 (pp) WP_091289566_3	false
3248	pp	SFB39971_1 (pp) WP_091674323_1	false
3249	pp	SFB39971_1 (pp) WP_091289566_2	false
3250	pp	SFB39971_1 (pp) WP_091289566_3	false
3251	pp	WP_091289566_3 (pp) WP_091674323_1	false
3252	pp	WP_091289566_2 (pp) WP_091674323_1	false
3253	pp	WP_091289566_2 (pp) WP_091289566_3	false
3254	pp	OQM68597_1 (pp) WP_080684945_2	false
3255	pp	OQM68597_1 (pp) WP_124284474_1	false
3256	pp	OQM68597_1 (pp) WP_132339706_2	false
3257	pp	OQM68597_1 (pp) WP_082248115_1	false
3258	pp	WP_132339706_2 (pp) WP_080684945_2	false
3259	pp	WP_082248115_1 (pp) WP_080684945_2	false
3260	pp	WP_082248115_1 (pp) WP_132339706_2	false
3261	pp	WP_124284474_1 (pp) WP_080684945_2	false
3262	pp	WP_124284474_1 (pp) WP_132339706_2	false
3263	pp	WP_124284474_1 (pp) WP_082248115_1	false
3264	pp	WP_109092842_1 (pp) PWF27333_3	false
3265	pp	WP_109092842_1 (pp) KTR94659_3	false
3266	pp	WP_109092842_1 (pp) WP_081323045_3	false
3267	pp	WP_133246044_3 (pp) PWF27333_3	false
3268	pp	WP_133246044_3 (pp) WP_109092842_1	false
3269	pp	WP_133246044_3 (pp) KTR94659_3	false
3270	pp	WP_133246044_3 (pp) WP_081323045_3	false
3271	pp	WP_081323045_3 (pp) KTR94659_3	false
3272	pp	PWF27333_3 (pp) KTR94659_3	false
3273	pp	PWF27333_3 (pp) WP_081323045_3	false
3274	pp	PJJ39560_1 (pp) WP_100302786_1	false
3275	pp	PJJ39560_1 (pp) WP_078572841_1	false
3276	pp	PJJ39560_1 (pp) WP_078564093_1	false
3277	pp	PJJ39560_1 (pp) RZU94771_1	false
3278	pp	WP_078572841_1 (pp) RZU94771_1	false
3279	pp	WP_078564093_1 (pp) WP_078572841_1	false
3280	pp	WP_078564093_1 (pp) RZU94771_1	false
3281	pp	WP_100302786_1 (pp) WP_078572841_1	false
3282	pp	WP_100302786_1 (pp) WP_078564093_1	false
3283	pp	WP_100302786_1 (pp) RZU94771_1	false
3284	pp	SDC53518_2 (pp) WP_091365795_2	false
3285	pp	SDC53518_2 (pp) SHF79230_2	false
3286	pp	SDC53518_2 (pp) WP_073419543_2	false
3287	pp	SDC53518_2 (pp) WP_089404560_3	false
3288	pp	WP_089404560_3 (pp) WP_091365795_2	false
3289	pp	WP_089404560_3 (pp) SHF79230_2	false
3290	pp	WP_089404560_3 (pp) WP_073419543_2	false
3291	pp	WP_073419543_2 (pp) WP_091365795_2	false
3292	pp	SHF79230_2 (pp) WP_091365795_2	false
3293	pp	SHF79230_2 (pp) WP_073419543_2	false
3294	pp	WP_089298084_1 (pp) WP_046567642_1	false
3295	pp	WP_089298084_1 (pp) WP_089157775_1	false
3296	pp	WP_046567642_1 (pp) WP_093610459_1	false
3297	pp	PWK29583_1 (pp) WP_046567642_1	false
3298	pp	PWK29583_1 (pp) WP_093610459_1	false
3299	pp	WP_089157775_1 (pp) WP_046567642_1	false
3300	pp	WP_089157775_1 (pp) PWK29583_1	false
3301	pp	WP_089157775_1 (pp) WP_093610459_1	false
3302	pp	AKS13949_2 (pp) WP_048589183_3	false
3303	pp	AKS13949_2 (pp) AIG09585_3	false
3304	pp	AKS13949_2 (pp) AKP09252_3	false
3305	pp	WP_048589183_3 (pp) AIG09585_3	false
3306	pp	WP_048589183_3 (pp) AKP09252_3	false
3307	pp	AIG09585_3 (pp) AKP09252_3	false
3308	pp	AER69640_3 (pp) AKS13949_2	false
3309	pp	AER69640_3 (pp) WP_048589183_3	false
3310	pp	AER69640_3 (pp) AIG09585_3	false
3311	pp	AER69640_3 (pp) AKP09252_3	false
3312	pp	WP_081384789_1 (pp) KQR47999_1	false
3313	pp	WP_081384789_1 (pp) OLO48687_1	false
3314	pp	WP_081384789_1 (pp) WP_075410821_9002	false
3315	pp	WP_081384789_1 (pp) WP_082508744_1	false
3316	pp	OLO48687_1 (pp) KQR47999_1	false
3317	pp	OLO48687_1 (pp) WP_075410821_9002	false
3318	pp	OLO48687_1 (pp) WP_082508744_1	false
3319	pp	WP_082508744_1 (pp) WP_075410821_9002	false
3320	pp	KQR47999_1 (pp) WP_075410821_9002	false
3321	pp	KQR47999_1 (pp) WP_082508744_1	false
3322	pp	WP_046085362_4 (pp) WP_078841030_4	false
3323	pp	WP_046085362_4 (pp) OPF84252_4	false
3324	pp	WP_046085362_4 (pp) WP_078841030_2	false
3325	pp	WP_046085362_4 (pp) OPF84252_2	false
3326	pp	WP_078841030_4 (pp) OPF84252_4	false
3327	pp	WP_078841030_4 (pp) WP_078841030_2	false
3328	pp	WP_078841030_4 (pp) OPF84252_2	false
3329	pp	OPF84252_4 (pp) OPF84252_2	false
3330	pp	WP_078841030_2 (pp) OPF84252_4	false
3331	pp	WP_078841030_2 (pp) OPF84252_2	false
3332	pp	WP_104820017_1 (pp) WP_051778263_1	false
3333	pp	WP_104820017_1 (pp) WP_104820017_2	false
3334	pp	WP_104820017_1 (pp) WP_057236399_1	false
3335	pp	WP_104820017_3 (pp) WP_051778263_1	false
3336	pp	WP_104820017_3 (pp) WP_104820017_1	false
3337	pp	WP_104820017_3 (pp) WP_104820017_2	false
3338	pp	WP_104820017_3 (pp) WP_057236399_1	false
3339	pp	WP_051778263_1 (pp) WP_057236399_1	false
3340	pp	WP_104820017_2 (pp) WP_051778263_1	false
3341	pp	WP_104820017_2 (pp) WP_057236399_1	false
3342	pp	WP_049563074_2 (pp) WP_057611617_3	false
3343	pp	WP_057611617_3 (pp) WP_018522479_2	false
3344	pp	WP_057611617_3 (pp) WP_028441277_2	false
3345	pp	WP_101404757_2 (pp) WP_057611617_3	false
3346	pp	WP_101404757_2 (pp) WP_018522479_2	false
3347	pp	WP_101404757_2 (pp) WP_028441277_2	false
3348	pp	WP_018522479_2 (pp) WP_028441277_2	false
3349	pp	ADD99586_6 (pp) EGR94682_5	false
3350	pp	WP_075371528_1 (pp) ADD99586_6	false
3351	pp	WP_075371528_1 (pp) EGR94682_5	false
3352	pp	ADD99586_1 (pp) ADD99586_6	false
3353	pp	ADD99586_1 (pp) EGR94682_5	false
3354	pp	ADD99586_1 (pp) WP_075371528_1	false
3355	pp	EGR94682_2 (pp) ADD99586_6	false
3356	pp	EGR94682_2 (pp) EGR94682_5	false
3357	pp	EGR94682_2 (pp) WP_075371528_1	false
3358	pp	EGR94682_2 (pp) ADD99586_1	false
3359	pp	WP_108724550_2 (pp) KPC95547_1	false
3360	pp	WP_108724550_2 (pp) WP_107100134_1	false
3361	pp	WP_108724550_2 (pp) WP_031027146_2	false
3362	pp	WP_108724550_2 (pp) WP_110666035_1	false
3363	pp	KPC95547_1 (pp) WP_107100134_1	false
3364	pp	KPC95547_1 (pp) WP_031027146_2	false
3365	pp	KPC95547_1 (pp) WP_110666035_1	false
3366	pp	WP_031027146_2 (pp) WP_107100134_1	false
3367	pp	WP_031027146_2 (pp) WP_110666035_1	false
3368	pp	WP_110666035_1 (pp) WP_107100134_1	false
3369	pp	EUA04475_3 (pp) WP_023370892_1	false
3370	pp	EUA04475_3 (pp) OOK66964_2	false
3371	pp	EUA04475_3 (pp) WP_063469930_2	false
3372	pp	EUA04475_3 (pp) WP_122441228_1	false
3373	pp	WP_122441228_1 (pp) WP_023370892_1	false
3374	pp	WP_122441228_1 (pp) OOK66964_2	false
3375	pp	WP_122441228_1 (pp) WP_063469930_2	false
3376	pp	WP_023370892_1 (pp) OOK66964_2	false
3377	pp	WP_063469930_2 (pp) WP_023370892_1	false
3378	pp	WP_063469930_2 (pp) OOK66964_2	false
3379	pp	WP_093640559_4 (pp) WP_126382680_3	false
3380	pp	WP_093640559_4 (pp) VEG28624_3	false
3381	pp	WP_093640559_4 (pp) WP_056678071_6	false
3382	pp	WP_093640559_4 (pp) WP_055699111_7	false
3383	pp	VEG28624_3 (pp) WP_126382680_3	false
3384	pp	WP_078966254_1 (pp) WP_128433746_1	false
3385	pp	WP_078966254_1 (pp) WP_050514186_1	false
3386	pp	WP_078966254_1 (pp) WP_050507047_1	false
3387	pp	WP_078966254_1 (pp) WP_099938361_1	false
3388	pp	WP_078966254_1 (pp) PIF99032_1	false
3389	pp	PIF99032_1 (pp) WP_128433746_1	false
3390	pp	PIF99032_1 (pp) WP_050514186_1	false
3391	pp	PIF99032_1 (pp) WP_050507047_1	false
3392	pp	PIF99032_1 (pp) WP_099938361_1	false
3393	pp	WP_128433746_1 (pp) WP_050514186_1	false
3394	pp	WP_128433746_1 (pp) WP_050507047_1	false
3395	pp	WP_128433746_1 (pp) WP_099938361_1	false
3396	pp	WP_050514186_1 (pp) WP_099938361_1	false
3397	pp	WP_050507047_1 (pp) WP_050514186_1	false
3398	pp	WP_050507047_1 (pp) WP_099938361_1	false
3399	pp	WP_071967420_1 (pp) WP_030877129_1	false
3400	pp	WP_017557210_1 (pp) WP_071967420_1	false
3401	pp	WP_017557210_1 (pp) WP_030877129_1	false
3402	pp	WP_073700824_1 (pp) WP_071967420_1	false
3403	pp	WP_073700824_1 (pp) WP_017557210_1	false
3404	pp	WP_073700824_1 (pp) WP_030877129_1	false
3405	pp	WP_089254486_1 (pp) WP_073700824_1	false
3406	pp	WP_090799956_1 (pp) WP_089254486_1	false
3407	pp	WP_119286192_1 (pp) WP_051709136_1	false
3408	pp	WP_119286192_1 (pp) WP_127935985_6	false
3409	pp	WP_091094839_1 (pp) WP_119286192_1	false
3410	pp	WP_091094839_1 (pp) WP_093656413_1	false
3411	pp	WP_091094839_1 (pp) WP_051709136_1	false
3412	pp	WP_091094839_1 (pp) WP_127935985_6	false
3413	pp	WP_093656413_1 (pp) WP_119286192_1	false
3414	pp	WP_093656413_1 (pp) WP_051709136_1	false
3415	pp	WP_093656413_1 (pp) WP_127935985_6	false
3416	pp	WP_120688998_1 (pp) WP_119286192_1	false
3417	pp	WP_120688998_1 (pp) WP_091094839_1	false
3418	pp	WP_120688998_1 (pp) WP_093656413_1	false
3419	pp	WP_120688998_1 (pp) WP_051709136_1	false
3420	pp	WP_120688998_1 (pp) WP_127935985_6	false
3421	pp	WP_051709136_1 (pp) WP_127935985_6	false
3422	pp	WP_018962008_3 (pp) WP_018962008_2	false
3423	pp	WP_018962008_3 (pp) WP_084692311_3	false
3424	pp	WP_018962008_3 (pp) WP_084436210_1	false
3425	pp	WP_018962008_3 (pp) WP_084692314_1	false
3426	pp	WP_018962008_3 (pp) WP_028567914_3	false
3427	pp	WP_018962008_2 (pp) WP_084436210_1	false
3428	pp	WP_018962008_2 (pp) WP_084692314_1	false
3429	pp	WP_018962008_2 (pp) WP_028567914_3	false
3430	pp	WP_084692311_3 (pp) WP_018962008_2	false
3431	pp	WP_084692311_3 (pp) WP_084692314_1	false
3432	pp	WP_093655900_3 (pp) WP_124799873_1	false
3433	pp	WP_093849541_2 (pp) WP_093655900_3	false
3434	pp	WP_093849541_2 (pp) WP_027743449_1	false
3435	pp	WP_093849541_2 (pp) WP_124799873_1	false
3436	pp	WP_027743449_1 (pp) WP_093655900_3	false
3437	pp	WP_027743449_1 (pp) WP_124799873_1	false
3438	pp	WP_085014622_3 (pp) WP_093655900_3	false
3439	pp	WP_085014622_3 (pp) WP_093849541_2	false
3440	pp	WP_085014622_3 (pp) WP_027743449_1	false
3441	pp	WP_085014622_3 (pp) WP_124799873_1	false
3442	pp	WP_093766414_1 (pp) WP_093655900_3	false
3443	pp	WP_093766414_1 (pp) WP_093849541_2	false
3444	pp	WP_093766414_1 (pp) WP_027743449_1	false
3445	pp	WP_093766414_1 (pp) WP_124799873_1	false
3446	pp	WP_093766414_1 (pp) WP_085014622_3	false
3447	pp	WP_132388264_1 (pp) WP_132186409_1	false
3448	pp	WP_132388264_1 (pp) WP_132388266_1	false
3449	pp	WP_132388264_1 (pp) WP_132268319_1	false
3450	pp	WP_132388264_1 (pp) WP_132268317_1	false
3451	pp	WP_132388264_1 (pp) WP_132186408_1	false
3452	pp	WP_132186409_1 (pp) WP_132388266_1	false
3453	pp	WP_132186409_1 (pp) WP_132268317_1	false
3454	pp	WP_132186409_1 (pp) WP_132186408_1	false
3455	pp	WP_132268319_1 (pp) WP_132186409_1	false
3456	pp	WP_132268319_1 (pp) WP_132268317_1	false
3457	pp	WP_132268319_1 (pp) WP_132388266_1	false
3458	pp	WP_132268319_1 (pp) WP_132186408_1	false
3459	pp	WP_132186408_1 (pp) WP_132268317_1	false
3460	pp	WP_132388266_1 (pp) WP_132268317_1	false
3461	pp	WP_132388266_1 (pp) WP_132186408_1	false
3462	pp	WP_091247291_1 (pp) WP_092807119_1	false
3463	pp	WP_091247291_1 (pp) SDG90099_1	false
3464	pp	WP_091247291_1 (pp) WP_091553165_1	false
3465	pp	WP_091247291_1 (pp) SCX58064_1	false
3466	pp	WP_091247291_1 (pp) WP_091067169_1	false
3467	pp	WP_092807119_1 (pp) SDG90099_1	false
3468	pp	WP_092807119_1 (pp) WP_091553165_1	false
3469	pp	WP_092807119_1 (pp) SCX58064_1	false
3470	pp	WP_092807119_1 (pp) WP_091067169_1	false
3471	pp	SCX58064_1 (pp) WP_091553165_1	false
3472	pp	SCX58064_1 (pp) WP_091067169_1	false
3473	pp	SDG90099_1 (pp) WP_091553165_1	false
3474	pp	SDG90099_1 (pp) SCX58064_1	false
3475	pp	SDG90099_1 (pp) WP_091067169_1	false
3476	pp	WP_091067169_1 (pp) WP_091553165_1	false
3477	pp	WP_133437797_1 (pp) WP_055578070_3	false
3478	pp	WP_133437797_1 (pp) WP_083271029_2	false
3479	pp	WP_133437797_1 (pp) ODR23958_2	false
3480	pp	WP_133437797_1 (pp) RUP01435_2	false
3481	pp	WP_133437797_1 (pp) WP_085249702_2	false
3482	pp	WP_055578070_3 (pp) WP_083271029_2	false
3483	pp	WP_055578070_3 (pp) ODR23958_2	false
3484	pp	WP_055578070_3 (pp) RUP01435_2	false
3485	pp	WP_055578070_3 (pp) WP_085249702_2	false
3486	pp	RUP01435_2 (pp) WP_083271029_2	false
3487	pp	RUP01435_2 (pp) WP_085249702_2	false
3488	pp	WP_085249702_2 (pp) WP_083271029_2	false
3489	pp	ODR23958_2 (pp) WP_083271029_2	false
3490	pp	ODR23958_2 (pp) RUP01435_2	false
3491	pp	ODR23958_2 (pp) WP_085249702_2	false
3492	pp	SCL44965_3 (pp) WP_091094891_1	false
3493	pp	SCL44965_3 (pp) SCL44965_2	false
3494	pp	SCL44965_3 (pp) WP_131761782_2	false
3495	pp	SCL44965_3 (pp) WP_014176997_1	false
3496	pp	SCL44965_3 (pp) WP_091030566_2	false
3497	pp	SCL44965_2 (pp) WP_131761782_2	false
3498	pp	SCL44965_2 (pp) WP_014176997_1	false
3499	pp	WP_131761782_2 (pp) WP_014176997_1	false
3500	pp	WP_091094891_1 (pp) SCL44965_2	false
3501	pp	WP_091094891_1 (pp) WP_131761782_2	false
3502	pp	WP_091094891_1 (pp) WP_014176997_1	false
3503	pp	WP_026413549_9004 (pp) WP_127935985_5	false
3504	pp	WP_026413549_9004 (pp) WP_120688998_9002	false
3505	pp	WP_026413549_9004 (pp) AEM00621_9001	false
3506	pp	WP_026413549_9004 (pp) WP_091094839_9004	false
3507	pp	WP_026413549_9004 (pp) WP_061921822_9003	false
3508	pp	WP_127935985_5 (pp) WP_120688998_9002	false
3509	pp	WP_127935985_5 (pp) AEM00621_9001	false
3510	pp	WP_127935985_5 (pp) WP_091094839_9004	false
3511	pp	WP_127935985_5 (pp) WP_061921822_9003	false
3512	pp	WP_120688998_9002 (pp) AEM00621_9001	false
3513	pp	WP_120688998_9002 (pp) WP_061921822_9003	false
3514	pp	WP_061921822_9003 (pp) AEM00621_9001	false
3515	pp	WP_091094839_9004 (pp) WP_120688998_9002	false
3516	pp	WP_091094839_9004 (pp) AEM00621_9001	false
3517	pp	WP_091094839_9004 (pp) WP_061921822_9003	false
3518	pp	WP_085014622_5 (pp) WP_027743449_6	false
3519	pp	WP_085014622_5 (pp) WP_117228578_2	false
3520	pp	WP_085014622_5 (pp) WP_035849420_6	false
3521	pp	WP_085014622_5 (pp) WP_109186559_2	false
3522	pp	WP_117228579_2 (pp) WP_117228578_2	false
3523	pp	WP_117228579_2 (pp) WP_085014622_5	false
3524	pp	WP_117228579_2 (pp) WP_035849420_6	false
3525	pp	WP_117228579_2 (pp) WP_109186559_2	false
3526	pp	WP_035849420_6 (pp) WP_027743449_6	false
3527	pp	WP_109186559_2 (pp) WP_027743449_6	false
3528	pp	WP_109186559_2 (pp) WP_035849420_6	false
3529	pp	WP_117228578_2 (pp) WP_035849420_6	false
3530	pp	WP_117228578_2 (pp) WP_109186559_2	false
3531	pp	WP_049804670_1 (pp) WP_117228578_1	false
3532	pp	WP_049804670_1 (pp) WP_117228580_1	false
3533	pp	WP_049804670_1 (pp) WP_013865884_1	false
3534	pp	WP_117228578_1 (pp) WP_117228580_1	false
3535	pp	WP_117228578_1 (pp) WP_013865884_1	false
3536	pp	WP_117228580_1 (pp) WP_013865884_1	false
3537	pp	WP_117228579_1 (pp) WP_117228578_1	false
3538	pp	WP_117228579_1 (pp) WP_049804670_1	false
3539	pp	WP_117228579_1 (pp) WP_117228580_1	false
3540	pp	WP_117228579_1 (pp) WP_013865884_1	false
3541	pp	BAK38069_1 (pp) WP_049804670_1	false
3542	pp	BAK38069_1 (pp) WP_117228578_1	false
3543	pp	BAK38069_1 (pp) WP_117228580_1	false
3544	pp	BAK38069_1 (pp) WP_013865884_1	false
3545	pp	BAK38069_1 (pp) WP_117228579_1	false
3546	pp	WP_013865882_1 (pp) WP_049804670_1	false
3547	pp	WP_013865882_1 (pp) WP_117228578_1	false
3548	pp	WP_013865882_1 (pp) WP_117228580_1	false
3549	pp	WP_013865882_1 (pp) WP_013865884_1	false
3550	pp	WP_013865882_1 (pp) WP_117228579_1	false
3551	pp	WP_013865882_1 (pp) BAK38069_1	false
3552	pp	WP_076824657_2 (pp) WP_091272827_3	false
3553	pp	WP_076824657_2 (pp) WP_091272829_3	false
3554	pp	WP_076824657_2 (pp) WP_131626375_3	false
3555	pp	WP_124003201_2 (pp) RPE52214_2	false
3556	pp	WP_124003201_2 (pp) WP_124003633_2	false
3557	pp	WP_091272829_3 (pp) RPE52214_2	false
3558	pp	WP_091272829_3 (pp) WP_124003201_2	false
3559	pp	WP_091272829_3 (pp) WP_131626375_3	false
3560	pp	WP_091272829_3 (pp) WP_124003633_2	false
3561	pp	WP_091272827_3 (pp) WP_124003201_2	false
3562	pp	WP_091272827_3 (pp) RPE52214_2	false
3563	pp	WP_091272827_3 (pp) WP_091272829_3	false
3564	pp	WP_091272827_3 (pp) WP_131626375_3	false
3565	pp	WP_091272827_3 (pp) WP_124003633_2	false
3566	pp	WP_124003633_2 (pp) RPE52214_2	false
3567	pp	WP_103517755_2 (pp) WP_115914639_1	false
3568	pp	WP_103517755_2 (pp) WP_071377378_1	false
3569	pp	WP_103517755_2 (pp) WP_054222272_1	false
3570	pp	WP_103517755_2 (pp) WP_084415984_2	false
3571	pp	WP_103517755_2 (pp) WP_018550650_1	false
3572	pp	WP_103517755_2 (pp) WP_051386825_1	false
3573	pp	WP_051386825_1 (pp) WP_115914639_1	false
3574	pp	WP_051386825_1 (pp) WP_071377378_1	false
3575	pp	WP_051386825_1 (pp) WP_084415984_2	false
3576	pp	WP_051386825_1 (pp) WP_018550650_1	false
3577	pp	WP_054222272_1 (pp) WP_115914639_1	false
3578	pp	WP_054222272_1 (pp) WP_071377378_1	false
3579	pp	WP_054222272_1 (pp) WP_084415984_2	false
3580	pp	WP_054222272_1 (pp) WP_018550650_1	false
3581	pp	WP_054222272_1 (pp) WP_051386825_1	false
3582	pp	WP_071377378_1 (pp) WP_115914639_1	false
3583	pp	WP_084415984_2 (pp) WP_115914639_1	false
3584	pp	WP_084415984_2 (pp) WP_071377378_1	false
3585	pp	WP_018550650_1 (pp) WP_115914639_1	false
3586	pp	WP_018550650_1 (pp) WP_071377378_1	false
3587	pp	WP_018550650_1 (pp) WP_084415984_2	false
3588	pp	WP_004004118_2 (pp) WP_104263679_2	false
3589	pp	WP_004004118_2 (pp) WP_035849418_3	false
3590	pp	WP_004004118_2 (pp) WP_084011357_4	false
3591	pp	WP_004004118_2 (pp) WP_045877303_4	false
3592	pp	WP_004004118_2 (pp) WP_035849420_5	false
3593	pp	WP_004004118_2 (pp) WP_067284698_2	false
3594	pp	WP_035849420_5 (pp) WP_104263679_2	false
3595	pp	WP_035849420_5 (pp) WP_035849418_3	false
3596	pp	WP_035849420_5 (pp) WP_045877303_4	false
3597	pp	WP_035849420_5 (pp) WP_067284698_2	false
3598	pp	WP_084011357_4 (pp) WP_035849418_3	false
3599	pp	WP_084011357_4 (pp) WP_045877303_4	false
3600	pp	WP_084011357_4 (pp) WP_035849420_5	false
3601	pp	WP_084011357_4 (pp) WP_067284698_2	false
3602	pp	WP_045877303_4 (pp) WP_035849418_3	false
3603	pp	WP_067284698_2 (pp) WP_035849418_3	false
3604	pp	WP_067284698_2 (pp) WP_045877303_4	false
3605	pp	WP_104263679_2 (pp) WP_035849418_3	false
3606	pp	WP_104263679_2 (pp) WP_084011357_4	false
3607	pp	WP_104263679_2 (pp) WP_045877303_4	false
3608	pp	WP_104263679_2 (pp) WP_067284698_2	false
3609	pp	WP_057576508_3 (pp) WP_078909294_7	false
3610	pp	WP_031012255_1 (pp) WP_057576508_3	false
3611	pp	WP_031012255_1 (pp) WP_078909294_7	false
3612	pp	WP_031012255_1 (pp) WP_107442966_5	false
3613	pp	SDN00667_2 (pp) WP_090014707_2	false
3614	pp	SDN00667_2 (pp) WP_107442966_5	false
3615	pp	WP_107442966_5 (pp) WP_057576508_3	false
3616	pp	WP_107442966_5 (pp) WP_078909294_7	false
3617	pp	WP_107442966_5 (pp) WP_015618321_1	false
3618	pp	WP_090014707_2 (pp) WP_107442966_5	false
3619	pp	SEC38602_2 (pp) WP_125813086_2	false
3620	pp	SEC38602_2 (pp) WP_126898321_2	false
3621	pp	SEC38602_2 (pp) WP_092779820_1	false
3622	pp	WP_086824496_1 (pp) WP_030432198_1	false
3623	pp	WP_086824496_1 (pp) WP_092779820_1	false
3624	pp	WP_121394015_1 (pp) SEC38602_2	false
3625	pp	WP_121394015_1 (pp) WP_086824496_1	false
3626	pp	WP_121394015_1 (pp) WP_030432198_1	false
3627	pp	WP_121394015_1 (pp) WP_126898321_2	false
3628	pp	WP_121394015_1 (pp) WP_092779820_1	false
3629	pp	WP_126898321_2 (pp) WP_125813086_2	false
3630	pp	WP_126898321_2 (pp) WP_092779820_1	false
3631	pp	WP_030432198_1 (pp) WP_092779820_1	false
3632	pp	WP_089157775_2 (pp) WP_088972034_1	false
3633	pp	WP_089157775_2 (pp) WP_120728438_1	false
3634	pp	WP_089157775_2 (pp) WP_088988891_1	false
3635	pp	WP_089157775_2 (pp) WP_088948967_1	false
3636	pp	WP_089157775_2 (pp) WP_046567642_2	false
3637	pp	WP_067306280_1 (pp) WP_088972034_1	false
3638	pp	WP_067306280_1 (pp) WP_120728438_1	false
3639	pp	WP_067306280_1 (pp) WP_088988891_1	false
3640	pp	WP_067306280_1 (pp) WP_088948967_1	false
3641	pp	WP_067306280_1 (pp) WP_089157775_2	false
3642	pp	WP_067306280_1 (pp) WP_046567642_2	false
3643	pp	WP_088972034_1 (pp) WP_088988891_1	false
3644	pp	WP_088972034_1 (pp) WP_120728438_1	false
3645	pp	WP_120728438_1 (pp) WP_088988891_1	false
3646	pp	WP_046567642_2 (pp) WP_088972034_1	false
3647	pp	WP_046567642_2 (pp) WP_088988891_1	false
3648	pp	WP_046567642_2 (pp) WP_120728438_1	false
3649	pp	WP_088948967_1 (pp) WP_088972034_1	false
3650	pp	WP_088948967_1 (pp) WP_088988891_1	false
3651	pp	WP_088948967_1 (pp) WP_120728438_1	false
3652	pp	WP_088948967_1 (pp) WP_046567642_2	false
3653	pp	WP_114055833_1 (pp) WP_053787331_1	false
3654	pp	WP_114055833_1 (pp) WP_103491678_3	false
3655	pp	WP_114055833_1 (pp) TDU80263_1	false
3656	pp	WP_114055833_1 (pp) WP_125541988_1	false
3657	pp	WP_114055833_1 (pp) WP_030633187_2	false
3658	pp	WP_086845754_2 (pp) WP_053787331_1	false
3659	pp	WP_086845754_2 (pp) WP_103491678_3	false
3660	pp	WP_086845754_2 (pp) TDU80263_1	false
3661	pp	WP_086845754_2 (pp) WP_114055833_1	false
3662	pp	WP_086845754_2 (pp) WP_125541988_1	false
3663	pp	WP_086845754_2 (pp) WP_030633187_2	false
3664	pp	TDU80263_1 (pp) WP_053787331_1	false
3665	pp	TDU80263_1 (pp) WP_103491678_3	false
3666	pp	TDU80263_1 (pp) WP_030633187_2	false
3667	pp	WP_125541988_1 (pp) WP_053787331_1	false
3668	pp	WP_125541988_1 (pp) WP_103491678_3	false
3669	pp	WP_125541988_1 (pp) TDU80263_1	false
3670	pp	WP_125541988_1 (pp) WP_030633187_2	false
3671	pp	WP_053787331_1 (pp) WP_103491678_3	false
3672	pp	WP_030633187_2 (pp) WP_103491678_3	false
3673	pp	WP_030633187_2 (pp) WP_053787331_1	false
3674	pp	WP_078564093_2 (pp) PJJ39560_2	false
3675	pp	WP_078564093_2 (pp) WP_078572841_2	false
3676	pp	WP_078564093_2 (pp) WP_100302786_2	false
3677	pp	WP_078564093_2 (pp) WP_052770273_1	false
3678	pp	WP_078564093_2 (pp) AKH86621_1	false
3679	pp	WP_078564093_2 (pp) RZU94771_2	false
3680	pp	WP_078572841_2 (pp) AKH86621_1	false
3681	pp	PJJ39560_2 (pp) WP_078572841_2	false
3682	pp	PJJ39560_2 (pp) AKH86621_1	false
3683	pp	WP_100302786_2 (pp) PJJ39560_2	false
3684	pp	WP_100302786_2 (pp) WP_078572841_2	false
3685	pp	WP_100302786_2 (pp) AKH86621_1	false
3686	pp	WP_052770273_1 (pp) PJJ39560_2	false
3687	pp	WP_052770273_1 (pp) WP_078572841_2	false
3688	pp	WP_052770273_1 (pp) WP_100302786_2	false
3689	pp	WP_052770273_1 (pp) AKH86621_1	false
3690	pp	RZU94771_2 (pp) WP_078572841_2	false
3691	pp	RZU94771_2 (pp) PJJ39560_2	false
3692	pp	RZU94771_2 (pp) WP_100302786_2	false
3693	pp	RZU94771_2 (pp) WP_052770273_1	false
3694	pp	RZU94771_2 (pp) AKH86621_1	false
3695	pp	ACZ89043_1 (pp) WP_086572205_1	false
3696	pp	ACZ89043_1 (pp) KLO64220_1	false
3697	pp	ACZ89043_1 (pp) WP_093886633_1	false
3698	pp	ACZ89043_1 (pp) SFI84698_1	false
3699	pp	ACZ89043_1 (pp) WP_081453250_1	false
3700	pp	ACZ89043_1 (pp) WP_081937495_1	false
3701	pp	WP_086572205_1 (pp) KLO64220_1	false
3702	pp	WP_086572205_1 (pp) WP_093886633_1	false
3703	pp	WP_086572205_1 (pp) SFI84698_1	false
3704	pp	WP_086572205_1 (pp) WP_081937495_1	false
3705	pp	WP_086572205_1 (pp) WP_081453250_1	false
3706	pp	KLO64220_1 (pp) WP_093886633_1	false
3707	pp	KLO64220_1 (pp) SFI84698_1	false
3708	pp	KLO64220_1 (pp) WP_081453250_1	false
3709	pp	KLO64220_1 (pp) WP_081937495_1	false
3710	pp	WP_081937495_1 (pp) WP_093886633_1	false
3711	pp	WP_081937495_1 (pp) SFI84698_1	false
3712	pp	WP_081937495_1 (pp) WP_081453250_1	false
3713	pp	WP_081453250_1 (pp) SFI84698_1	false
3714	pp	WP_093886633_1 (pp) SFI84698_1	false
3715	pp	WP_093886633_1 (pp) WP_081453250_1	false
3716	pp	OMO45941_3 (pp) PKB45316_2	false
3717	pp	OMO45941_3 (pp) WP_088246551_2	false
3718	pp	OMO45941_3 (pp) WP_053587900_2	false
3719	pp	OMO45941_3 (pp) WP_088261769_1	false
3720	pp	OMO45941_3 (pp) WP_100886407_2	false
3721	pp	OMO45941_3 (pp) WP_088264775_2	false
3722	pp	WP_088264775_2 (pp) PKB45316_2	false
3723	pp	WP_088264775_2 (pp) WP_088246551_2	false
3724	pp	WP_088264775_2 (pp) WP_053587900_2	false
3725	pp	WP_088264775_2 (pp) WP_088261769_1	false
3726	pp	WP_088264775_2 (pp) WP_100886407_2	false
3727	pp	PKB45316_2 (pp) WP_053587900_2	false
3728	pp	PKB45316_2 (pp) WP_088261769_1	false
3729	pp	PKB45316_2 (pp) WP_100886407_2	false
3730	pp	WP_053587900_2 (pp) WP_088261769_1	false
3731	pp	WP_053587900_2 (pp) WP_100886407_2	false
3732	pp	WP_088261769_1 (pp) WP_100886407_2	false
3733	pp	WP_088246551_2 (pp) PKB45316_2	false
3734	pp	WP_088246551_2 (pp) WP_053587900_2	false
3735	pp	WP_088246551_2 (pp) WP_088261769_1	false
3736	pp	WP_088246551_2 (pp) WP_100886407_2	false
3737	pp	WP_053729790_2 (pp) AKJ15899_3	false
3738	pp	WP_053729790_2 (pp) WP_053729792_2	false
3739	pp	WP_100584684_1 (pp) AKJ15899_3	false
3740	pp	WP_100584684_1 (pp) RPF24868_2	false
3741	pp	WP_100584684_1 (pp) WP_123971014_2	false
3742	pp	RPF24868_2 (pp) PKB45316_1	false
3743	pp	RPF24868_2 (pp) WP_100886407_1	false
3744	pp	RPF24868_2 (pp) AKJ15899_3	false
3745	pp	RPF24868_2 (pp) WP_123971014_2	false
3746	pp	WP_100886407_1 (pp) AKJ15899_3	false
3747	pp	WP_100886407_1 (pp) WP_123971014_2	false
3748	pp	PKB45316_1 (pp) WP_100886407_1	false
3749	pp	PKB45316_1 (pp) AKJ15899_3	false
3750	pp	PKB45316_1 (pp) WP_123971014_2	false
3751	pp	AKJ15899_3 (pp) WP_053729792_2	false
3752	pp	WP_123971014_2 (pp) AKJ15899_3	false
3753	pp	WP_085014622_4 (pp) WP_064110435_5	false
3754	pp	WP_085014622_4 (pp) WP_093655900_4	false
3755	pp	WP_085014622_4 (pp) WP_093849541_3	false
3756	pp	WP_085014622_4 (pp) WP_027743449_3	false
3757	pp	WP_085014622_4 (pp) WP_090039557_5	false
3758	pp	WP_085014622_4 (pp) WP_085014620_3	false
3759	pp	WP_093766414_3 (pp) WP_064110435_5	false
3760	pp	WP_093766414_3 (pp) WP_085014622_4	false
3761	pp	WP_093766414_3 (pp) WP_093655900_4	false
3762	pp	WP_093766414_3 (pp) WP_093849541_3	false
3763	pp	WP_093766414_3 (pp) WP_027743449_3	false
3764	pp	WP_093766414_3 (pp) WP_090039557_5	false
3765	pp	WP_093766414_3 (pp) WP_085014620_3	false
3766	pp	WP_093655900_4 (pp) WP_064110435_5	false
3767	pp	WP_093655900_4 (pp) WP_093849541_3	false
3768	pp	WP_093655900_4 (pp) WP_027743449_3	false
3769	pp	WP_093655900_4 (pp) WP_090039557_5	false
3770	pp	WP_093655900_4 (pp) WP_085014620_3	false
3771	pp	WP_027743449_3 (pp) WP_064110435_5	false
3772	pp	WP_027743449_3 (pp) WP_093849541_3	false
3773	pp	WP_027743449_3 (pp) WP_090039557_5	false
3774	pp	WP_027743449_3 (pp) WP_085014620_3	false
3775	pp	WP_064110435_5 (pp) WP_090039557_5	false
3776	pp	WP_064110435_5 (pp) WP_085014620_3	false
3777	pp	WP_085014620_3 (pp) WP_090039557_5	false
3778	pp	WP_093849541_3 (pp) WP_064110435_5	false
3779	pp	WP_093849541_3 (pp) WP_090039557_5	false
3780	pp	WP_093849541_3 (pp) WP_085014620_3	false
3781	pp	WP_131785729_1 (pp) WP_004004118_1	false
3782	pp	WP_131785729_1 (pp) WP_035849420_4	false
3783	pp	WP_131785729_1 (pp) WP_067284698_1	false
3784	pp	WP_131785729_1 (pp) WP_035849418_2	false
3785	pp	WP_131785729_1 (pp) WP_045877303_2	false
3786	pp	WP_131785729_1 (pp) WP_131785730_1	false
3787	pp	WP_131785729_1 (pp) WP_084011357_2	false
3788	pp	WP_004004118_1 (pp) WP_045877303_2	false
3789	pp	WP_035849420_4 (pp) WP_004004118_1	false
3790	pp	WP_035849420_4 (pp) WP_035849418_2	false
3791	pp	WP_035849420_4 (pp) WP_045877303_2	false
3792	pp	WP_035849420_4 (pp) WP_131785730_1	false
3793	pp	WP_035849418_2 (pp) WP_004004118_1	false
3794	pp	WP_035849418_2 (pp) WP_045877303_2	false
3795	pp	WP_035849418_2 (pp) WP_131785730_1	false
3796	pp	WP_131785730_1 (pp) WP_004004118_1	false
3797	pp	WP_131785730_1 (pp) WP_045877303_2	false
3798	pp	WP_084011357_2 (pp) WP_004004118_1	false
3799	pp	WP_084011357_2 (pp) WP_035849420_4	false
3800	pp	WP_084011357_2 (pp) WP_035849418_2	false
3801	pp	WP_084011357_2 (pp) WP_045877303_2	false
3802	pp	WP_084011357_2 (pp) WP_131785730_1	false
3803	pp	WP_067284698_1 (pp) WP_004004118_1	false
3804	pp	WP_067284698_1 (pp) WP_035849420_4	false
3805	pp	WP_067284698_1 (pp) WP_035849418_2	false
3806	pp	WP_067284698_1 (pp) WP_045877303_2	false
3807	pp	WP_067284698_1 (pp) WP_131785730_1	false
3808	pp	WP_067284698_1 (pp) WP_084011357_2	false
3809	pp	WP_061787443_2 (pp) SEC29390_1	false
3810	pp	WP_061787443_2 (pp) WP_066215709_1	false
3811	pp	WP_089950617_1 (pp) SEC29390_1	false
3812	pp	WP_089950617_1 (pp) WP_052852666_1	false
3813	pp	WP_089950617_1 (pp) WP_066215709_1	false
3814	pp	WP_089950617_1 (pp) SEQ53933_1	false
3815	pp	WP_066215709_1 (pp) SEC29390_1	false
3816	pp	WP_066215709_1 (pp) WP_052852666_1	false
3817	pp	WP_066215709_1 (pp) WP_109280200_1	false
3818	pp	WP_066215709_1 (pp) SEQ53933_1	false
3819	pp	WP_109280137_1 (pp) SEC29390_1	false
3820	pp	WP_109280137_1 (pp) WP_052852666_1	false
3821	pp	WP_109280137_1 (pp) WP_109280200_1	false
3822	pp	WP_109280137_1 (pp) WP_066215709_1	false
3823	pp	WP_052852666_1 (pp) SEQ53933_1	false
3824	pp	WP_109280200_1 (pp) WP_052852666_1	false
3825	pp	SEC29390_1 (pp) WP_052852666_1	false
3826	pp	SEC29390_1 (pp) WP_109280200_1	false
3827	pp	SEC29390_1 (pp) SEQ53933_1	false
3828	pp	BAG17422_1 (pp) WP_052295615_1	false
3829	pp	BAG17422_1 (pp) KOU46944_3	false
3830	pp	BAG17422_1 (pp) WP_083191919_3	false
3831	pp	WP_055559179_2 (pp) WP_052295615_1	false
3832	pp	WP_055559179_2 (pp) BAG17422_1	false
3833	pp	WP_055559179_2 (pp) KOU46944_3	false
3834	pp	WP_055559179_2 (pp) WP_083191919_3	false
3835	pp	WP_106731546_1 (pp) WP_052295615_1	false
3836	pp	WP_106731546_1 (pp) BAG17422_1	false
3837	pp	WP_106731546_1 (pp) KOU46944_3	false
3838	pp	WP_106731546_1 (pp) WP_083191919_3	false
3839	pp	WP_106731546_1 (pp) WP_055559179_2	false
3840	pp	WP_106731546_1 (pp) KOG82578_4	false
3841	pp	KOG82578_4 (pp) WP_052295615_1	false
3842	pp	KOG82578_4 (pp) BAG17422_1	false
3843	pp	KOG82578_4 (pp) KOU46944_3	false
3844	pp	KOG82578_4 (pp) WP_083191919_3	false
3845	pp	KOG82578_4 (pp) WP_055559179_2	false
3846	pp	SDE31545_2 (pp) WP_052295615_1	false
3847	pp	SDE31545_2 (pp) BAG17422_1	false
3848	pp	SDE31545_2 (pp) KOU46944_3	false
3849	pp	SDE31545_2 (pp) WP_083191919_3	false
3850	pp	SDE31545_2 (pp) WP_055559179_2	false
3851	pp	SDE31545_2 (pp) WP_106731546_1	false
3852	pp	SDE31545_2 (pp) KOG82578_4	false
3853	pp	KOU46944_3 (pp) WP_083191919_3	false
3854	pp	WP_052295615_1 (pp) KOU46944_3	false
3855	pp	WP_052295615_1 (pp) WP_083191919_3	false
3856	pp	WP_090047429_4 (pp) WP_109636347_1	false
3857	pp	WP_090047429_4 (pp) SMC91639_2	false
3858	pp	WP_090047429_4 (pp) WP_090064781_1	false
3859	pp	WP_090047429_4 (pp) WP_093590338_1	false
3860	pp	WP_090047429_4 (pp) SER15522_2	false
3861	pp	WP_090047429_4 (pp) WP_090003614_1	false
3862	pp	WP_089952439_2 (pp) WP_109636347_1	false
3863	pp	WP_089952439_2 (pp) SMC91639_2	false
3864	pp	WP_089952439_2 (pp) WP_090047429_4	false
3865	pp	WP_089952439_2 (pp) WP_090064781_1	false
3866	pp	WP_089952439_2 (pp) WP_093590338_1	false
3867	pp	WP_089952439_2 (pp) SER15522_2	false
3868	pp	WP_089952439_2 (pp) WP_090003614_1	false
3869	pp	SER15522_2 (pp) WP_109636347_1	false
3870	pp	SER15522_2 (pp) SMC91639_2	false
3871	pp	SER15522_2 (pp) WP_090064781_1	false
3872	pp	SER15522_2 (pp) WP_093590338_1	false
3873	pp	SER15522_2 (pp) WP_090003614_1	false
3874	pp	WP_109636347_1 (pp) SMC91639_2	false
3875	pp	WP_109636347_1 (pp) WP_090064781_1	false
3876	pp	WP_109636347_1 (pp) WP_093590338_1	false
3877	pp	WP_109636347_1 (pp) WP_090003614_1	false
3878	pp	PWK88358_1 (pp) SMC91639_2	false
3879	pp	PWK88358_1 (pp) WP_090047429_4	false
3880	pp	PWK88358_1 (pp) WP_089952439_2	false
3881	pp	PWK88358_1 (pp) WP_090064781_1	false
3882	pp	PWK88358_1 (pp) WP_093590338_1	false
3883	pp	PWK88358_1 (pp) SER15522_2	false
3884	pp	PWK88358_1 (pp) WP_109636347_1	false
3885	pp	PWK88358_1 (pp) WP_090003614_1	false
3886	pp	SMC91639_2 (pp) WP_090064781_1	false
3887	pp	WP_093590338_1 (pp) SMC91639_2	false
3888	pp	WP_093590338_1 (pp) WP_090064781_1	false
3889	pp	WP_090003614_1 (pp) SMC91639_2	false
3890	pp	WP_090003614_1 (pp) WP_090064781_1	false
3891	pp	WP_090003614_1 (pp) WP_093590338_1	false
3892	pp	WP_073785992_4 (pp) KOV37396_2	false
3893	pp	WP_073785992_4 (pp) WP_051771079_1	false
3894	pp	WP_073785992_4 (pp) KJY27974_1	false
3895	pp	WP_073785992_4 (pp) WP_078902009_1	false
3896	pp	WP_073785992_4 (pp) OKH95170_4	false
3897	pp	WP_073785992_4 (pp) EIF94124_2	false
3898	pp	WP_121006702_1 (pp) WP_078902009_1	false
3899	pp	EIF94124_2 (pp) KOV37396_2	false
3900	pp	EIF94124_2 (pp) WP_051771079_1	false
3901	pp	EIF94124_2 (pp) KJY27974_1	false
3902	pp	EIF94124_2 (pp) WP_062703680_1	false
3903	pp	EIF94124_2 (pp) WP_078902009_1	false
3904	pp	EIF94124_2 (pp) OKH95170_4	false
3905	pp	EIF94124_2 (pp) WP_121006702_1	false
3906	pp	KJY27974_1 (pp) KOV37396_2	false
3907	pp	KJY27974_1 (pp) WP_051771079_1	false
3908	pp	KJY27974_1 (pp) WP_078902009_1	false
3909	pp	KJY27974_1 (pp) OKH95170_4	false
3910	pp	KOV37396_2 (pp) WP_078902009_1	false
3911	pp	OKH95170_4 (pp) KOV37396_2	false
3912	pp	OKH95170_4 (pp) WP_078902009_1	false
3913	pp	WP_051771079_1 (pp) KOV37396_2	false
3914	pp	WP_051771079_1 (pp) WP_078902009_1	false
3915	pp	WP_051771079_1 (pp) OKH95170_4	false
3916	pp	WP_062703680_1 (pp) WP_078902009_1	false
3917	pp	WP_030462613_2 (pp) WP_088799362_3	false
3918	pp	WP_030462613_2 (pp) WP_037881970_3	false
3919	pp	WP_030462613_2 (pp) WP_030040480_4	false
3920	pp	WP_030462613_2 (pp) WP_067603246_1	false
3921	pp	WP_030462613_2 (pp) WP_053747924_3	false
3922	pp	WP_030462613_2 (pp) WP_111415595_4	false
3923	pp	WP_037881970_3 (pp) WP_088799362_3	false
3924	pp	WP_037881970_3 (pp) WP_030040480_4	false
3925	pp	WP_037881970_3 (pp) WP_067603246_1	false
3926	pp	WP_037881970_3 (pp) WP_053747924_3	false
3927	pp	WP_037881970_3 (pp) WP_111415595_4	false
3928	pp	WP_088799351_2 (pp) WP_088799362_4	false
3929	pp	WP_088799351_2 (pp) WP_067603246_1	false
3930	pp	WP_088799362_4 (pp) WP_067603246_1	false
3931	pp	WP_088799362_3 (pp) WP_067603246_1	false
3932	pp	WP_088799362_3 (pp) WP_053747924_3	false
3933	pp	WP_088799362_3 (pp) WP_111415595_4	false
3934	pp	WP_067603246_1 (pp) WP_111415595_4	false
3935	pp	WP_053747924_3 (pp) WP_067603246_1	false
3936	pp	WP_053747924_3 (pp) WP_111415595_4	false
3937	pp	WP_030040480_4 (pp) WP_088799362_3	false
3938	pp	WP_030040480_4 (pp) WP_067603246_1	false
3939	pp	WP_030040480_4 (pp) WP_053747924_3	false
3940	pp	WP_030040480_4 (pp) WP_111415595_4	false
3941	pp	WP_063471945_1 (pp) WP_122530149_1	false
3942	pp	WP_063471945_1 (pp) EUA05503_1	false
3943	pp	WP_063471945_1 (pp) WP_085105271_1	false
3944	pp	WP_063471945_1 (pp) WP_083102943_1	false
3945	pp	WP_063471945_1 (pp) WP_085252934_1	false
3946	pp	WP_063471945_1 (pp) WP_083115648_1	false
3947	pp	WP_063471945_1 (pp) WP_085671318_1	false
3948	pp	WP_063471945_1 (pp) OOK83994_1	false
3949	pp	WP_085252934_1 (pp) WP_122530149_1	false
3950	pp	WP_085252934_1 (pp) EUA05503_1	false
3951	pp	WP_085252934_1 (pp) WP_085105271_1	false
3952	pp	WP_085252934_1 (pp) WP_083102943_1	false
3953	pp	WP_085252934_1 (pp) WP_083115648_1	false
3954	pp	WP_085252934_1 (pp) WP_085671318_1	false
3955	pp	WP_085252934_1 (pp) OOK83994_1	false
3956	pp	EUA05503_1 (pp) WP_122530149_1	false
3957	pp	EUA05503_1 (pp) WP_083102943_1	false
3958	pp	EUA05503_1 (pp) WP_083115648_1	false
3959	pp	EUA05503_1 (pp) OOK83994_1	false
3960	pp	WP_085105271_1 (pp) WP_122530149_1	false
3961	pp	WP_085105271_1 (pp) EUA05503_1	false
3962	pp	WP_085105271_1 (pp) WP_083102943_1	false
3963	pp	WP_085105271_1 (pp) WP_083115648_1	false
3964	pp	WP_085105271_1 (pp) OOK83994_1	false
3965	pp	WP_085671318_1 (pp) WP_122530149_1	false
3966	pp	WP_085671318_1 (pp) EUA05503_1	false
3967	pp	WP_085671318_1 (pp) WP_085105271_1	false
3968	pp	WP_085671318_1 (pp) WP_083102943_1	false
3969	pp	WP_085671318_1 (pp) WP_083115648_1	false
3970	pp	WP_085671318_1 (pp) OOK83994_1	false
3971	pp	WP_122530149_1 (pp) WP_083102943_1	false
3972	pp	OOK83994_1 (pp) WP_122530149_1	false
3973	pp	OOK83994_1 (pp) WP_083102943_1	false
3974	pp	WP_083115648_1 (pp) WP_122530149_1	false
3975	pp	WP_083115648_1 (pp) WP_083102943_1	false
3976	pp	WP_083115648_1 (pp) OOK83994_1	false
3977	pp	WP_085014622_2 (pp) WP_064110435_4	false
3978	pp	WP_085014622_2 (pp) WP_093849541_6	false
3979	pp	WP_085014622_2 (pp) WP_093766414_5	false
3980	pp	WP_085014622_2 (pp) WP_085014620_2	false
3981	pp	WP_085014622_2 (pp) WP_090039557_4	false
3982	pp	WP_085014622_2 (pp) WP_027743449_5	false
3983	pp	WP_085014622_2 (pp) WP_093655900_6	false
3984	pp	WP_085014622_2 (pp) WP_035849420_3	false
3985	pp	WP_085014620_2 (pp) WP_064110435_4	false
3986	pp	WP_085014620_2 (pp) WP_093849541_6	false
3987	pp	WP_085014620_2 (pp) WP_090039557_4	false
3988	pp	WP_085014620_2 (pp) WP_035849420_3	false
3989	pp	WP_027743449_5 (pp) WP_064110435_4	false
3990	pp	WP_027743449_5 (pp) WP_085014620_2	false
3991	pp	WP_027743449_5 (pp) WP_093849541_6	false
3992	pp	WP_027743449_5 (pp) WP_090039557_4	false
3993	pp	WP_027743449_5 (pp) WP_035849420_3	false
3994	pp	WP_093655900_6 (pp) WP_085014620_2	false
3995	pp	WP_093655900_6 (pp) WP_064110435_4	false
3996	pp	WP_093655900_6 (pp) WP_093849541_6	false
3997	pp	WP_093655900_6 (pp) WP_027743449_5	false
3998	pp	WP_093655900_6 (pp) WP_090039557_4	false
3999	pp	WP_093655900_6 (pp) WP_035849420_3	false
4000	pp	WP_093766414_5 (pp) WP_085014620_2	false
4001	pp	WP_093766414_5 (pp) WP_064110435_4	false
4002	pp	WP_093766414_5 (pp) WP_093849541_6	false
4003	pp	WP_093766414_5 (pp) WP_027743449_5	false
4004	pp	WP_093766414_5 (pp) WP_090039557_4	false
4005	pp	WP_093766414_5 (pp) WP_093655900_6	false
4006	pp	WP_093766414_5 (pp) WP_035849420_3	false
4007	pp	WP_064110435_4 (pp) WP_093849541_6	false
4008	pp	WP_064110435_4 (pp) WP_090039557_4	false
4009	pp	WP_090039557_4 (pp) WP_093849541_6	false
4010	pp	WP_035849420_3 (pp) WP_093849541_6	false
4011	pp	WP_035849420_3 (pp) WP_064110435_4	false
4012	pp	WP_035849420_3 (pp) WP_090039557_4	false
4013	pp	WP_090039557_1 (pp) WP_093766414_2	false
4014	pp	WP_090039557_1 (pp) WP_085014620_5	false
4015	pp	WP_090039557_1 (pp) WP_064110435_1	false
4016	pp	WP_090039557_1 (pp) WP_093655900_2	false
4017	pp	WP_090039557_1 (pp) WP_035849420_2	false
4018	pp	WP_090039557_1 (pp) WP_027743449_2	false
4019	pp	WP_090039557_1 (pp) WP_093849541_1	false
4020	pp	WP_085014620_5 (pp) WP_093766414_2	false
4021	pp	WP_085014620_5 (pp) WP_064110435_1	false
4022	pp	WP_085014620_5 (pp) WP_027743449_2	false
4023	pp	WP_093655900_2 (pp) WP_093766414_2	false
4024	pp	WP_093655900_2 (pp) WP_085014620_5	false
4025	pp	WP_093655900_2 (pp) WP_064110435_1	false
4026	pp	WP_093655900_2 (pp) WP_035849420_2	false
4027	pp	WP_093655900_2 (pp) WP_027743449_2	false
4028	pp	WP_093655900_2 (pp) WP_093849541_1	false
4029	pp	WP_035849420_2 (pp) WP_093766414_2	false
4030	pp	WP_035849420_2 (pp) WP_085014620_5	false
4031	pp	WP_035849420_2 (pp) WP_064110435_1	false
4032	pp	WP_035849420_2 (pp) WP_027743449_2	false
4033	pp	WP_027743449_2 (pp) WP_093766414_2	false
4034	pp	WP_027743449_2 (pp) WP_064110435_1	false
4035	pp	WP_093849541_1 (pp) WP_093766414_2	false
4036	pp	WP_093849541_1 (pp) WP_085014620_5	false
4037	pp	WP_093849541_1 (pp) WP_064110435_1	false
4038	pp	WP_093849541_1 (pp) WP_035849420_2	false
4039	pp	WP_093849541_1 (pp) WP_027743449_2	false
4040	pp	WP_085014622_7 (pp) WP_093766414_2	false
4041	pp	WP_085014622_7 (pp) WP_090039557_1	false
4042	pp	WP_085014622_7 (pp) WP_085014620_5	false
4043	pp	WP_085014622_7 (pp) WP_064110435_1	false
4044	pp	WP_085014622_7 (pp) WP_093655900_2	false
4045	pp	WP_085014622_7 (pp) WP_035849420_2	false
4046	pp	WP_085014622_7 (pp) WP_027743449_2	false
4047	pp	WP_085014622_7 (pp) WP_093849541_1	false
4048	pp	WP_064110435_1 (pp) WP_093766414_2	false
4049	pp	KZC95159_1 (pp) WP_053775823_1	false
4050	pp	KZC95159_1 (pp) AWF97203_1	false
4051	pp	KZC95159_1 (pp) WP_043668521_1	false
4052	pp	KZC95159_1 (pp) WP_086517141_1	false
4053	pp	KZC95159_1 (pp) WP_104343881_1	false
4054	pp	KZC95159_1 (pp) OUE24647_1	false
4055	pp	KZC95159_1 (pp) WP_086515725_1	false
4056	pp	KZC95159_1 (pp) OUE10317_1	false
4057	pp	WP_086515725_1 (pp) WP_053775823_1	false
4058	pp	WP_086515725_1 (pp) AWF97203_1	false
4059	pp	WP_086515725_1 (pp) WP_043668521_1	false
4060	pp	WP_086515725_1 (pp) WP_086517141_1	false
4061	pp	WP_086515725_1 (pp) WP_104343881_1	false
4062	pp	WP_086515725_1 (pp) OUE24647_1	false
4063	pp	WP_086515725_1 (pp) OUE10317_1	false
4064	pp	WP_104343881_1 (pp) WP_053775823_1	false
4065	pp	WP_104343881_1 (pp) AWF97203_1	false
4066	pp	WP_104343881_1 (pp) WP_043668521_1	false
4067	pp	WP_104343881_1 (pp) WP_086517141_1	false
4068	pp	WP_104343881_1 (pp) OUE24647_1	false
4069	pp	WP_104343881_1 (pp) OUE10317_1	false
4070	pp	WP_043668521_1 (pp) AWF97203_1	false
4071	pp	WP_043668521_1 (pp) WP_086517141_1	false
4072	pp	WP_043668521_1 (pp) OUE24647_1	false
4073	pp	WP_043668521_1 (pp) OUE10317_1	false
4074	pp	WP_086517141_1 (pp) AWF97203_1	false
4075	pp	WP_086517141_1 (pp) OUE24647_1	false
4076	pp	OUE10317_1 (pp) AWF97203_1	false
4077	pp	OUE10317_1 (pp) WP_086517141_1	false
4078	pp	OUE10317_1 (pp) OUE24647_1	false
4079	pp	WP_053775823_1 (pp) AWF97203_1	false
4080	pp	WP_053775823_1 (pp) WP_043668521_1	false
4081	pp	WP_053775823_1 (pp) WP_086517141_1	false
4082	pp	WP_053775823_1 (pp) OUE24647_1	false
4083	pp	WP_053775823_1 (pp) OUE10317_1	false
4084	pp	OUE24647_1 (pp) AWF97203_1	false
4085	pp	WP_037862255_3 (pp) WP_063758854_2	false
4086	pp	WP_037862255_3 (pp) WP_055553439_2	false
4087	pp	WP_055482843_1 (pp) KIE24863_5	false
4088	pp	WP_055482843_1 (pp) WP_055553439_2	false
4089	pp	WP_055482843_1 (pp) WP_051458184_1	false
4090	pp	WP_055482843_1 (pp) AKJ13608_4	false
4091	pp	WP_055553439_2 (pp) KIE24863_5	false
4092	pp	WP_055553439_2 (pp) WP_063758854_2	false
4093	pp	WP_055553439_2 (pp) WP_063832391_1	false
4094	pp	WP_055553439_2 (pp) AKJ13608_4	false
4095	pp	KIE24863_5 (pp) AKJ13608_4	false
4096	pp	WP_051458184_1 (pp) WP_055553439_2	false
4097	pp	WP_004018421_2 (pp) WP_051458184_1	false
4098	pp	WP_037881970_2 (pp) WP_088799351_1	false
4099	pp	WP_037881970_2 (pp) WP_111415595_3	false
4100	pp	WP_037881970_2 (pp) WP_030040480_2	false
4101	pp	WP_037881970_2 (pp) WP_053747924_1	false
4102	pp	WP_037881970_2 (pp) WP_088799362_2	false
4103	pp	WP_037881970_2 (pp) WP_067603246_2	false
4104	pp	WP_067603246_2 (pp) WP_111415595_3	false
4105	pp	WP_067603246_2 (pp) WP_053747924_1	false
4106	pp	WP_067603246_2 (pp) WP_088799362_2	false
4107	pp	WP_030040480_2 (pp) WP_111415595_3	false
4108	pp	WP_030040480_2 (pp) WP_088799351_1	false
4109	pp	WP_030040480_2 (pp) WP_088799362_2	false
4110	pp	WP_030040480_2 (pp) WP_067603246_2	false
4111	pp	WP_030040480_2 (pp) WP_053747924_1	false
4112	pp	WP_030040480_2 (pp) WP_063274437_1	false
4113	pp	WP_030462613_1 (pp) WP_111415595_3	false
4114	pp	WP_030462613_1 (pp) WP_088799351_1	false
4115	pp	WP_030462613_1 (pp) WP_030040480_2	false
4116	pp	WP_030462613_1 (pp) WP_037881970_2	false
4117	pp	WP_030462613_1 (pp) WP_053747924_1	false
4118	pp	WP_030462613_1 (pp) WP_088799362_2	false
4119	pp	WP_030462613_1 (pp) WP_067603246_2	false
4120	pp	WP_088799351_1 (pp) WP_111415595_3	false
4121	pp	WP_088799351_1 (pp) WP_088799362_2	false
4122	pp	WP_088799351_1 (pp) WP_067603246_2	false
4123	pp	WP_088799351_1 (pp) WP_053747924_1	false
4124	pp	WP_111415595_3 (pp) WP_053747924_1	false
4125	pp	WP_088799362_2 (pp) WP_111415595_3	false
4126	pp	WP_088799362_2 (pp) WP_053747924_1	false
4127	pp	WP_063274437_1 (pp) WP_030462613_1	false
4128	pp	WP_063274437_1 (pp) WP_088799351_1	false
4129	pp	WP_063274437_1 (pp) WP_111415595_3	false
4130	pp	WP_063274437_1 (pp) WP_053747924_1	false
4131	pp	WP_063274437_1 (pp) WP_088799362_2	false
4132	pp	WP_062440803_1 (pp) WP_113985589_1	false
4133	pp	WP_062440803_1 (pp) SIR58548_1	false
4134	pp	WP_062440803_1 (pp) WP_049570352_3	false
4135	pp	WP_062440803_1 (pp) WP_062349267_1	false
4136	pp	WP_062440803_1 (pp) WP_066366076_1	false
4137	pp	WP_062440803_1 (pp) WP_015622289_1	false
4138	pp	WP_062440803_1 (pp) WP_061300623_1	false
4139	pp	WP_062440803_1 (pp) WP_111167565_1	false
4140	pp	WP_114029832_1 (pp) WP_113985589_1	false
4141	pp	WP_114029832_1 (pp) SIR58548_1	false
4142	pp	WP_114029832_1 (pp) WP_062349267_1	false
4143	pp	WP_114029832_1 (pp) WP_049570352_3	false
4144	pp	WP_114029832_1 (pp) WP_066366076_1	false
4145	pp	WP_114029832_1 (pp) WP_062440803_1	false
4146	pp	WP_114029832_1 (pp) WP_015622289_1	false
4147	pp	WP_114029832_1 (pp) WP_111167565_1	false
4148	pp	WP_114029832_1 (pp) WP_061300623_1	false
4149	pp	SIR58548_1 (pp) WP_113985589_1	false
4150	pp	SIR58548_1 (pp) WP_062349267_1	false
4151	pp	SIR58548_1 (pp) WP_049570352_3	false
4152	pp	SIR58548_1 (pp) WP_066366076_1	false
4153	pp	SIR58548_1 (pp) WP_015622289_1	false
4154	pp	SIR58548_1 (pp) WP_111167565_1	false
4155	pp	SIR58548_1 (pp) WP_061300623_1	false
4156	pp	WP_066366076_1 (pp) WP_113985589_1	false
4157	pp	WP_066366076_1 (pp) WP_015622289_1	false
4158	pp	WP_066366076_1 (pp) WP_061300623_1	false
4159	pp	WP_066366076_1 (pp) WP_111167565_1	false
4160	pp	WP_066366076_1 (pp) WP_062349267_1	false
4161	pp	WP_066366076_1 (pp) WP_049570352_3	false
4162	pp	WP_062349267_1 (pp) WP_111167565_1	false
4163	pp	WP_049570352_3 (pp) WP_062349267_1	false
4164	pp	WP_049570352_3 (pp) WP_111167565_1	false
4165	pp	WP_049570352_3 (pp) WP_061300623_1	false
4166	pp	WP_015622289_1 (pp) WP_062349267_1	false
4167	pp	WP_015622289_1 (pp) WP_049570352_3	false
4168	pp	WP_015622289_1 (pp) WP_111167565_1	false
4169	pp	WP_015622289_1 (pp) WP_061300623_1	false
4170	pp	WP_061300623_1 (pp) WP_062349267_1	false
4171	pp	WP_061300623_1 (pp) WP_111167565_1	false
4172	pp	WP_113985589_1 (pp) WP_062349267_1	false
4173	pp	WP_113985589_1 (pp) WP_049570352_3	false
4174	pp	WP_113985589_1 (pp) WP_015622289_1	false
4175	pp	WP_113985589_1 (pp) WP_111167565_1	false
4176	pp	WP_113985589_1 (pp) WP_061300623_1	false
4177	pp	WP_018657395_2 (pp) WP_113979595_1	false
4178	pp	WP_018657395_2 (pp) WP_075941351_1	false
4179	pp	WP_018657395_2 (pp) WP_129800352_1	false
4180	pp	WP_018657395_2 (pp) WP_061294147_1	false
4181	pp	WP_018657395_2 (pp) WP_092533827_2	false
4182	pp	WP_018657395_2 (pp) WP_117404578_1	false
4183	pp	WP_018657395_2 (pp) WP_132172132_1	false
4184	pp	WP_018657395_2 (pp) WP_132339706_4	false
4185	pp	ALE82507_2 (pp) WP_092533827_2	false
4186	pp	ALE82507_2 (pp) WP_117404578_1	false
4187	pp	WP_132339706_4 (pp) WP_113979595_1	false
4188	pp	WP_132339706_4 (pp) WP_129800352_1	false
4189	pp	WP_132339706_4 (pp) WP_061294147_1	false
4190	pp	WP_132339706_4 (pp) WP_092533827_2	false
4191	pp	WP_132339706_4 (pp) WP_117404578_1	false
4192	pp	WP_132339706_4 (pp) WP_132172132_1	false
4193	pp	WP_075941351_1 (pp) WP_129800352_1	false
4194	pp	WP_075941351_1 (pp) WP_092533827_2	false
4195	pp	WP_075941351_1 (pp) WP_061294147_1	false
4196	pp	WP_075941351_1 (pp) WP_117404578_1	false
4197	pp	WP_075941351_1 (pp) WP_132172132_1	false
4198	pp	WP_075941351_1 (pp) ALE82507_2	false
4199	pp	WP_075941351_1 (pp) WP_132339706_4	false
4200	pp	WP_113979595_1 (pp) WP_061294147_1	false
4201	pp	WP_113979595_1 (pp) WP_117404578_1	false
4202	pp	WP_129800352_1 (pp) WP_113979595_1	false
4203	pp	WP_129800352_1 (pp) WP_061294147_1	false
4204	pp	WP_129800352_1 (pp) WP_117404578_1	false
4205	pp	WP_061294147_1 (pp) WP_117404578_1	false
4206	pp	WP_092533827_2 (pp) WP_117404578_1	false
4207	pp	WP_132172132_1 (pp) WP_113979595_1	false
4208	pp	WP_132172132_1 (pp) WP_129800352_1	false
4209	pp	WP_132172132_1 (pp) WP_061294147_1	false
4210	pp	WP_132172132_1 (pp) WP_092533827_2	false
4211	pp	WP_132172132_1 (pp) WP_117404578_1	false
4212	pp	WP_017559667_2 (pp) WP_017608824_2	false
4213	pp	WP_017559667_2 (pp) WP_017559667_1	false
4214	pp	WP_017559667_2 (pp) WP_046468711_3	false
4215	pp	OFK71393_2 (pp) WP_083296694_1	false
4216	pp	WP_017608824_2 (pp) OFK71393_2	false
4217	pp	WP_017608824_2 (pp) WP_017559667_1	false
4218	pp	WP_017608824_2 (pp) WP_131103335_5	false
4219	pp	WP_017608824_2 (pp) WP_083296694_1	false
4220	pp	WP_046468711_3 (pp) WP_120205519_2	false
4221	pp	WP_046468711_3 (pp) WP_131103335_5	false
4222	pp	WP_046468711_3 (pp) WP_101559196_2	false
4223	pp	WP_046468711_3 (pp) WP_119835460_2	false
4224	pp	WP_120205519_2 (pp) WP_131103335_5	false
4225	pp	WP_120205519_2 (pp) WP_119835460_2	false
4226	pp	WP_120205519_2 (pp) WP_101559196_2	false
4227	pp	WP_101559196_2 (pp) WP_119835460_2	false
4228	pp	WP_131103335_5 (pp) WP_119835460_2	false
4229	pp	WP_131103335_5 (pp) WP_101559196_2	false
4230	pp	WP_091114658_1 (pp) WP_110909804_2	false
4231	pp	WP_091114658_1 (pp) PYG35723_2	false
4232	pp	WP_091114658_1 (pp) WP_089404560_2	false
4233	pp	WP_091114658_1 (pp) WP_091365795_1	false
4234	pp	WP_091114658_1 (pp) WP_075012634_1	false
4235	pp	WP_091114658_1 (pp) WP_093583210_1	false
4236	pp	WP_091114658_1 (pp) WP_106275543_1	false
4237	pp	WP_091114658_1 (pp) SDC53518_1	false
4238	pp	WP_091114658_1 (pp) SFO01480_1	false
4239	pp	WP_106275543_1 (pp) WP_110909804_2	false
4240	pp	WP_106275543_1 (pp) PYG35723_2	false
4241	pp	WP_106275543_1 (pp) WP_075012634_1	false
4242	pp	WP_106275543_1 (pp) WP_089404560_2	false
4243	pp	WP_106275543_1 (pp) WP_091365795_1	false
4244	pp	WP_106275543_1 (pp) WP_093583210_1	false
4245	pp	WP_106275543_1 (pp) SDC53518_1	false
4246	pp	SFO01480_1 (pp) WP_110909804_2	false
4247	pp	SFO01480_1 (pp) PYG35723_2	false
4248	pp	SFO01480_1 (pp) WP_089404560_2	false
4249	pp	SFO01480_1 (pp) WP_091365795_1	false
4250	pp	SFO01480_1 (pp) WP_075012634_1	false
4251	pp	SFO01480_1 (pp) WP_093583210_1	false
4252	pp	SFO01480_1 (pp) WP_106275543_1	false
4253	pp	SFO01480_1 (pp) SDC53518_1	false
4254	pp	PYG35723_2 (pp) WP_075012634_1	false
4255	pp	PYG35723_2 (pp) WP_089404560_2	false
4256	pp	PYG35723_2 (pp) WP_091365795_1	false
4257	pp	PYG35723_2 (pp) SDC53518_1	false
4258	pp	WP_093583210_1 (pp) PYG35723_2	false
4259	pp	WP_093583210_1 (pp) WP_075012634_1	false
4260	pp	WP_093583210_1 (pp) WP_089404560_2	false
4261	pp	WP_093583210_1 (pp) WP_091365795_1	false
4262	pp	WP_093583210_1 (pp) SDC53518_1	false
4263	pp	WP_110909804_2 (pp) PYG35723_2	false
4264	pp	WP_110909804_2 (pp) WP_075012634_1	false
4265	pp	WP_110909804_2 (pp) WP_089404560_2	false
4266	pp	WP_110909804_2 (pp) WP_091365795_1	false
4267	pp	WP_110909804_2 (pp) WP_093583210_1	false
4268	pp	WP_110909804_2 (pp) SDC53518_1	false
4269	pp	SDC53518_1 (pp) WP_075012634_1	false
4270	pp	SDC53518_1 (pp) WP_089404560_2	false
4271	pp	SDC53518_1 (pp) WP_091365795_1	false
4272	pp	WP_089404560_2 (pp) WP_091365795_1	false
4273	pp	WP_075012634_1 (pp) WP_089404560_2	false
4274	pp	WP_075012634_1 (pp) WP_091365795_1	false
4275	pp	AKH86621_2 (pp) WP_131561563_1	false
4276	pp	AKH86621_2 (pp) RZU94771_3	false
4277	pp	AKH86621_2 (pp) PJJ39560_3	false
4278	pp	AKH86621_2 (pp) WP_078564093_3	false
4279	pp	AKH86621_2 (pp) WP_100302786_3	false
4280	pp	AKH86621_2 (pp) WP_052770273_2	false
4281	pp	AKH86621_2 (pp) WP_078572841_3	false
4282	pp	AKH86621_2 (pp) ANS70161_2	false
4283	pp	AKH86621_2 (pp) AXG59058_2	false
4284	pp	ANS70161_2 (pp) WP_131561563_1	false
4285	pp	ANS70161_2 (pp) RZU94771_3	false
4286	pp	ANS70161_2 (pp) PJJ39560_3	false
4287	pp	ANS70161_2 (pp) WP_078564093_3	false
4288	pp	ANS70161_2 (pp) WP_100302786_3	false
4289	pp	ANS70161_2 (pp) WP_052770273_2	false
4290	pp	ANS70161_2 (pp) WP_078572841_3	false
4291	pp	ANS70161_2 (pp) AXG59058_2	false
4292	pp	PJJ39560_3 (pp) RZU94771_3	false
4293	pp	PJJ39560_3 (pp) WP_078564093_3	false
4294	pp	PJJ39560_3 (pp) WP_100302786_3	false
4295	pp	PJJ39560_3 (pp) WP_052770273_2	false
4296	pp	PJJ39560_3 (pp) AXG59058_2	false
4297	pp	WP_078572841_3 (pp) PJJ39560_3	false
4298	pp	WP_078572841_3 (pp) RZU94771_3	false
4299	pp	WP_078572841_3 (pp) WP_078564093_3	false
4300	pp	WP_078572841_3 (pp) WP_100302786_3	false
4301	pp	WP_078572841_3 (pp) WP_052770273_2	false
4302	pp	WP_078572841_3 (pp) AXG59058_2	false
4303	pp	WP_131561563_1 (pp) RZU94771_3	false
4304	pp	WP_131561563_1 (pp) PJJ39560_3	false
4305	pp	WP_131561563_1 (pp) WP_078564093_3	false
4306	pp	WP_131561563_1 (pp) WP_100302786_3	false
4307	pp	WP_131561563_1 (pp) WP_052770273_2	false
4308	pp	WP_131561563_1 (pp) WP_078572841_3	false
4309	pp	WP_131561563_1 (pp) AXG59058_2	false
4310	pp	RZU94771_3 (pp) WP_078564093_3	false
4311	pp	RZU94771_3 (pp) WP_100302786_3	false
4312	pp	RZU94771_3 (pp) WP_052770273_2	false
4313	pp	RZU94771_3 (pp) AXG59058_2	false
4314	pp	WP_052770273_2 (pp) WP_078564093_3	false
4315	pp	WP_052770273_2 (pp) WP_100302786_3	false
4316	pp	WP_052770273_2 (pp) AXG59058_2	false
4317	pp	WP_078564093_3 (pp) WP_100302786_3	false
4318	pp	AXG59058_2 (pp) WP_078564093_3	false
4319	pp	AXG59058_2 (pp) WP_100302786_3	false
4320	pp	WP_092556553_3 (pp) WP_006347379_1	false
4321	pp	WP_092556553_3 (pp) WP_100806338_6	false
4322	pp	WP_092556553_3 (pp) WP_124286732_7	false
4323	pp	WP_092556553_3 (pp) WP_030633187_1	false
4324	pp	WP_092556553_3 (pp) WP_114032054_1	false
4325	pp	WP_092556553_3 (pp) WP_100806338_7	false
4326	pp	WP_092556553_3 (pp) WP_023554016_3	false
4327	pp	WP_017589866_3 (pp) WP_030633187_1	false
4328	pp	WP_100806338_6 (pp) WP_006347379_1	false
4329	pp	WP_100806338_6 (pp) WP_030633187_1	false
4330	pp	WP_100806338_6 (pp) WP_114032054_1	false
4331	pp	WP_100806338_6 (pp) WP_100806338_7	false
4332	pp	WP_023554016_3 (pp) WP_006347379_1	false
4333	pp	WP_023554016_3 (pp) WP_100806338_6	false
4334	pp	WP_023554016_3 (pp) WP_059190156_4	false
4335	pp	WP_023554016_3 (pp) WP_124286732_7	false
4336	pp	WP_023554016_3 (pp) WP_030633187_1	false
4337	pp	WP_023554016_3 (pp) WP_114032054_1	false
4338	pp	WP_100806338_7 (pp) WP_006347379_1	false
4339	pp	WP_100806338_7 (pp) WP_030633187_1	false
4340	pp	WP_114032054_1 (pp) WP_006347379_1	false
4341	pp	WP_114032054_1 (pp) WP_124286732_7	false
4342	pp	WP_114032054_1 (pp) WP_100806338_7	false
4343	pp	WP_114032054_1 (pp) WP_030633187_1	false
4344	pp	WP_123603612_2 (pp) WP_006347379_1	false
4345	pp	WP_123603612_2 (pp) WP_030633187_1	false
4346	pp	WP_123603612_2 (pp) WP_114032054_1	false
4347	pp	SBO93312_1 (pp) WP_080042116_1	false
4348	pp	SBO93312_1 (pp) WP_111170305_1	false
4349	pp	SBO93312_1 (pp) WP_090941614_2	false
4350	pp	SBO93312_1 (pp) WP_113984581_2	false
4351	pp	SBO93312_1 (pp) WP_012891705_1	false
4352	pp	SBO93312_1 (pp) SPL97283_1	false
4353	pp	SBO93312_1 (pp) WP_103960548_2	false
4354	pp	SBO93312_1 (pp) WP_084772427_3	false
4355	pp	SBO93312_1 (pp) SEG99236_2	false
4356	pp	SPL97283_1 (pp) WP_080042116_1	false
4357	pp	SPL97283_1 (pp) WP_012891705_1	false
4358	pp	SPL97283_1 (pp) WP_103960548_2	false
4359	pp	SPL97283_1 (pp) WP_111170305_1	false
4360	pp	SPL97283_1 (pp) WP_090941614_2	false
4361	pp	SPL97283_1 (pp) WP_113984581_2	false
4362	pp	SPL97283_1 (pp) WP_084772427_3	false
4363	pp	SPL97283_1 (pp) SEG99236_2	false
4364	pp	WP_103960548_2 (pp) WP_080042116_1	false
4365	pp	WP_103960548_2 (pp) WP_012891705_1	false
4366	pp	WP_103960548_2 (pp) WP_113984581_2	false
4367	pp	WP_103960548_2 (pp) WP_084772427_3	false
4368	pp	WP_103960548_2 (pp) SEG99236_2	false
4369	pp	WP_090941614_2 (pp) WP_080042116_1	false
4370	pp	WP_090941614_2 (pp) WP_012891705_1	false
4371	pp	WP_090941614_2 (pp) WP_103960548_2	false
4372	pp	WP_090941614_2 (pp) WP_134033092_1	false
4373	pp	WP_090941614_2 (pp) WP_113984581_2	false
4374	pp	WP_090941614_2 (pp) WP_084772427_3	false
4375	pp	WP_090941614_2 (pp) SEG99236_2	false
4376	pp	WP_113984581_2 (pp) WP_080042116_1	false
4377	pp	WP_113984581_2 (pp) WP_012891705_1	false
4378	pp	WP_113984581_2 (pp) WP_084772427_3	false
4379	pp	WP_084772427_3 (pp) WP_080042116_1	false
4380	pp	WP_084772427_3 (pp) WP_012891705_1	false
4381	pp	SEG99236_2 (pp) WP_080042116_1	false
4382	pp	SEG99236_2 (pp) WP_012891705_1	false
4383	pp	SEG99236_2 (pp) WP_113984581_2	false
4384	pp	SEG99236_2 (pp) WP_084772427_3	false
4385	pp	WP_111170305_1 (pp) WP_080042116_1	false
4386	pp	WP_111170305_1 (pp) WP_012891705_1	false
4387	pp	WP_111170305_1 (pp) WP_103960548_2	false
4388	pp	WP_111170305_1 (pp) WP_090941614_2	false
4389	pp	WP_111170305_1 (pp) WP_113984581_2	false
4390	pp	WP_111170305_1 (pp) WP_084772427_3	false
4391	pp	WP_111170305_1 (pp) SEG99236_2	false
4392	pp	WP_080042116_1 (pp) WP_012891705_1	false
4393	pp	WP_113979657_4 (pp) WP_027760735_1	false
4394	pp	WP_113979657_4 (pp) WP_079171959_1	false
4395	pp	WP_113979657_4 (pp) WP_114021280_1	false
4396	pp	WP_113979657_4 (pp) WP_111166051_7	false
4397	pp	WP_113979657_4 (pp) OEV01037_1	false
4398	pp	WP_113979657_4 (pp) WP_114018158_1	false
4399	pp	WP_113979657_4 (pp) WP_099881056_1	false
4400	pp	WP_113979657_4 (pp) WP_086575168_3	false
4401	pp	WP_114018158_1 (pp) WP_027760735_1	false
4402	pp	WP_114018158_1 (pp) WP_079171959_1	false
4403	pp	WP_114018158_1 (pp) WP_084211656_2	false
4404	pp	WP_114018158_1 (pp) WP_114021280_1	false
4405	pp	WP_114018158_1 (pp) WP_111166051_7	false
4406	pp	WP_114018158_1 (pp) WP_111035529_1	false
4407	pp	WP_114018158_1 (pp) WP_099881056_1	false
4408	pp	WP_114018158_1 (pp) OEV01037_1	false
4409	pp	WP_114018158_1 (pp) WP_086575168_3	false
4410	pp	WP_084211656_2 (pp) WP_027760735_1	false
4411	pp	WP_084211656_2 (pp) OEV01037_1	false
4412	pp	WP_084211656_2 (pp) WP_086575168_3	false
4413	pp	WP_079171959_1 (pp) WP_027760735_1	false
4414	pp	WP_079171959_1 (pp) WP_084211656_2	false
4415	pp	WP_079171959_1 (pp) WP_111166051_7	false
4416	pp	WP_079171959_1 (pp) WP_111035529_1	false
4417	pp	WP_079171959_1 (pp) OEV01037_1	false
4418	pp	WP_079171959_1 (pp) WP_099881056_1	false
4419	pp	WP_079171959_1 (pp) WP_086575168_3	false
4420	pp	WP_111166051_7 (pp) WP_027760735_1	false
4421	pp	WP_111166051_7 (pp) WP_084211656_2	false
4422	pp	WP_111166051_7 (pp) OEV01037_1	false
4423	pp	WP_111166051_7 (pp) WP_086575168_3	false
4424	pp	WP_099881056_1 (pp) WP_027760735_1	false
4425	pp	WP_099881056_1 (pp) WP_111166051_7	false
4426	pp	WP_099881056_1 (pp) OEV01037_1	false
4427	pp	WP_099881056_1 (pp) WP_086575168_3	false
4428	pp	WP_114021280_1 (pp) WP_027760735_1	false
4429	pp	WP_114021280_1 (pp) WP_079171959_1	false
4430	pp	WP_114021280_1 (pp) WP_111166051_7	false
4431	pp	WP_114021280_1 (pp) WP_111035529_1	false
4432	pp	WP_114021280_1 (pp) WP_099881056_1	false
4433	pp	WP_114021280_1 (pp) OEV01037_1	false
4434	pp	WP_114021280_1 (pp) WP_086575168_3	false
4435	pp	WP_027760735_1 (pp) WP_086575168_3	false
4436	pp	OEV01037_1 (pp) WP_027760735_1	false
4437	pp	OEV01037_1 (pp) WP_086575168_3	false
4438	pp	WP_111035529_1 (pp) WP_027760735_1	false
4439	pp	WP_111035529_1 (pp) OEV01037_1	false
4440	pp	WP_111035529_1 (pp) WP_086575168_3	false
4441	pp	WP_043014356_2 (pp) AKS13949_1	false
4442	pp	WP_043014356_2 (pp) AER69640_1	false
4443	pp	WP_043014356_2 (pp) WP_087454414_2	false
4444	pp	WP_043014356_2 (pp) AKP09252_2	false
4445	pp	WP_043014356_2 (pp) ESU58068_2	false
4446	pp	WP_043014356_2 (pp) AIG09585_2	false
4447	pp	WP_043014356_2 (pp) WP_046096646_2	false
4448	pp	WP_043014356_2 (pp) WP_054468484_3	false
4449	pp	WP_043014356_2 (pp) WP_048589183_2	false
4450	pp	WP_043014356_2 (pp) WP_038620030_2	false
4451	pp	ESU58068_2 (pp) AKS13949_1	false
4452	pp	ESU58068_2 (pp) AER69640_1	false
4453	pp	ESU58068_2 (pp) WP_087454414_2	false
4454	pp	ESU58068_2 (pp) AKP09252_2	false
4455	pp	ESU58068_2 (pp) AIG09585_2	false
4456	pp	ESU58068_2 (pp) WP_046096646_2	false
4457	pp	ESU58068_2 (pp) WP_054468484_3	false
4458	pp	ESU58068_2 (pp) WP_038620030_2	false
4459	pp	ESU58068_2 (pp) WP_048589183_2	false
4460	pp	WP_046096646_2 (pp) AKS13949_1	false
4461	pp	WP_046096646_2 (pp) AER69640_1	false
4462	pp	WP_046096646_2 (pp) WP_087454414_2	false
4463	pp	WP_046096646_2 (pp) AKP09252_2	false
4464	pp	WP_046096646_2 (pp) WP_054468484_3	false
4465	pp	WP_046096646_2 (pp) WP_038620030_2	false
4466	pp	WP_046096646_2 (pp) WP_048589183_2	false
4467	pp	AIG09585_2 (pp) AKS13949_1	false
4468	pp	AIG09585_2 (pp) WP_087454414_2	false
4469	pp	AIG09585_2 (pp) AER69640_1	false
4470	pp	AIG09585_2 (pp) AKP09252_2	false
4471	pp	AIG09585_2 (pp) WP_046096646_2	false
4472	pp	AIG09585_2 (pp) WP_054468484_3	false
4473	pp	AIG09585_2 (pp) WP_048589183_2	false
4474	pp	AIG09585_2 (pp) WP_038620030_2	false
4475	pp	AKS13949_1 (pp) AKP09252_2	false
4476	pp	AER69640_1 (pp) AKS13949_1	false
4477	pp	AER69640_1 (pp) WP_087454414_2	false
4478	pp	AER69640_1 (pp) AKP09252_2	false
4479	pp	AER69640_1 (pp) WP_038620030_2	false
4480	pp	WP_087454414_2 (pp) AKS13949_1	false
4481	pp	WP_087454414_2 (pp) AKP09252_2	false
4482	pp	WP_038620030_2 (pp) AKS13949_1	false
4483	pp	WP_038620030_2 (pp) WP_087454414_2	false
4484	pp	WP_038620030_2 (pp) AKP09252_2	false
4485	pp	WP_048589183_2 (pp) AKS13949_1	false
4486	pp	WP_048589183_2 (pp) WP_087454414_2	false
4487	pp	WP_048589183_2 (pp) AER69640_1	false
4488	pp	WP_048589183_2 (pp) AKP09252_2	false
4489	pp	WP_048589183_2 (pp) WP_038620030_2	false
4490	pp	WP_054468484_3 (pp) AKS13949_1	false
4491	pp	WP_054468484_3 (pp) AER69640_1	false
4492	pp	WP_054468484_3 (pp) WP_087454414_2	false
4493	pp	WP_054468484_3 (pp) AKP09252_2	false
4494	pp	WP_054468484_3 (pp) WP_038620030_2	false
4495	pp	WP_054468484_3 (pp) WP_048589183_2	false
4496	pp	WP_036403339_1 (pp) WP_065136618_1	false
4497	pp	WP_036403339_1 (pp) WP_122442751_1	false
4498	pp	WP_036403339_1 (pp) WP_075510821_1	false
4499	pp	WP_036403339_1 (pp) ODR23958_1	false
4500	pp	WP_036403339_1 (pp) WP_065164254_2	false
4501	pp	WP_036403339_1 (pp) ORC04413_1	false
4502	pp	WP_036403339_1 (pp) WP_055578070_1	false
4503	pp	WP_036403339_1 (pp) WP_133437797_2	false
4504	pp	WP_036403339_1 (pp) WP_083271029_1	false
4505	pp	WP_036403339_1 (pp) RUP01435_1	false
4506	pp	WP_083271029_1 (pp) WP_065136618_1	false
4507	pp	WP_083271029_1 (pp) WP_122442751_1	false
4508	pp	WP_083271029_1 (pp) ODR23958_1	false
4509	pp	WP_083271029_1 (pp) WP_065164254_2	false
4510	pp	WP_083271029_1 (pp) WP_075510821_1	false
4511	pp	WP_083271029_1 (pp) WP_055578070_1	false
4512	pp	WP_083271029_1 (pp) WP_133437797_2	false
4513	pp	WP_083271029_1 (pp) ORC04413_1	false
4514	pp	WP_083271029_1 (pp) RUP01435_1	false
4515	pp	WP_055578070_1 (pp) WP_065136618_1	false
4516	pp	WP_055578070_1 (pp) WP_065164254_2	false
4517	pp	WP_055578070_1 (pp) ODR23958_1	false
4518	pp	WP_055578070_1 (pp) WP_075510821_1	false
4519	pp	WP_055578070_1 (pp) WP_133437797_2	false
4520	pp	WP_055578070_1 (pp) ORC04413_1	false
4521	pp	WP_055578070_1 (pp) RUP01435_1	false
4522	pp	WP_122442751_1 (pp) WP_075510821_1	false
4523	pp	WP_122442751_1 (pp) ODR23958_1	false
4524	pp	WP_122442751_1 (pp) WP_065136618_1	false
4525	pp	WP_122442751_1 (pp) WP_065164254_2	false
4526	pp	WP_122442751_1 (pp) ORC04413_1	false
4527	pp	WP_122442751_1 (pp) WP_055578070_1	false
4528	pp	WP_122442751_1 (pp) WP_133437797_2	false
4529	pp	WP_122442751_1 (pp) RUP01435_1	false
4530	pp	WP_065136618_1 (pp) WP_075510821_1	false
4531	pp	WP_065136618_1 (pp) ORC04413_1	false
4532	pp	WP_065136618_1 (pp) RUP01435_1	false
4533	pp	WP_065164254_2 (pp) WP_065136618_1	false
4534	pp	WP_065164254_2 (pp) WP_075510821_1	false
4535	pp	WP_065164254_2 (pp) WP_133437797_2	false
4536	pp	WP_065164254_2 (pp) ORC04413_1	false
4537	pp	WP_065164254_2 (pp) RUP01435_1	false
4538	pp	WP_133437797_2 (pp) WP_065136618_1	false
4539	pp	WP_133437797_2 (pp) WP_075510821_1	false
4540	pp	WP_133437797_2 (pp) ORC04413_1	false
4541	pp	WP_133437797_2 (pp) RUP01435_1	false
4542	pp	ORC04413_1 (pp) WP_075510821_1	false
4543	pp	ORC04413_1 (pp) RUP01435_1	false
4544	pp	RUP01435_1 (pp) WP_075510821_1	false
4545	pp	ODR23958_1 (pp) WP_065136618_1	false
4546	pp	ODR23958_1 (pp) WP_065164254_2	false
4547	pp	ODR23958_1 (pp) WP_075510821_1	false
4548	pp	ODR23958_1 (pp) WP_133437797_2	false
4549	pp	ODR23958_1 (pp) ORC04413_1	false
[truncated: 25,244 more rows]
