# Supplementary material for: Discovery and characterisation of an amidine-containing ribosomally-synthesised peptide that is widely distributed in nature
Source: Royal Society of Chemistry journal article supplement (doi:10.1039/d1sc01456k), 2021-01-01
Supplement: d1sc01456k2.cys [file d1sc01456k2.cys › CytoscapeSession-2019_12_19-13_30/tables/52-cc_1.to.494.txt/LOCAL_ATTRS-org.cytoscape.model.CyNetwork-cc_1.to.494.txt+default+network.cytable]

"CyCSV-Version","1"
"SUID","__Annotations","name","networkMetadata","selected"
"java.lang.Long","java.util.List<java.lang.String>","java.lang.String","java.lang.String","java.lang.Boolean"
"","mutable","","mutable",""
"cc_1.to.494.txt default network",""
"52","","cc_1.to.494.txt",,"true"
