# Supplementary material for: Discovery and characterisation of an amidine-containing ribosomally-synthesised peptide that is widely distributed in nature
Source: Royal Society of Chemistry journal article supplement (doi:10.1039/d1sc01456k), 2021-01-01
Supplement: d1sc01456k2.cys [file d1sc01456k2.cys › CytoscapeSession-2019_12_19-13_30/tables/cytables.xml]

<?xml version="1.0" encoding="UTF-8" standalone="yes"?>
<cyTables>
    <virtualColumns>
        <virtualColumn immutable="false" targetJoinKey="SUID" targetTable="52-cc_1.to.494.txt/LOCAL_ATTRS-org.cytoscape.model.CyNetwork-cc_1.to.494.txt+default+network.cytable" sourceJoinKey="SUID" sourceTable="36-cc_1.to.494.txt/SHARED_ATTRS-org.cytoscape.model.CyNetwork-36+shared+network.cytable" sourceColumn="shared name" name="shared name"/>
        <virtualColumn immutable="false" targetJoinKey="SUID" targetTable="52-cc_1.to.494.txt/LOCAL_ATTRS-org.cytoscape.model.CyNode-cc_1.to.494.txt+default+node.cytable" sourceJoinKey="SUID" sourceTable="36-cc_1.to.494.txt/SHARED_ATTRS-org.cytoscape.model.CyNode-36+shared+node.cytable" sourceColumn="shared name" name="shared name"/>
        <virtualColumn immutable="false" targetJoinKey="SUID" targetTable="52-cc_1.to.494.txt/LOCAL_ATTRS-org.cytoscape.model.CyNode-cc_1.to.494.txt+default+node.cytable" sourceJoinKey="SUID" sourceTable="36-cc_1.to.494.txt/SHARED_ATTRS-org.cytoscape.model.CyNode-36+shared+node.cytable" sourceColumn="Accession" name="Accession"/>
        <virtualColumn immutable="false" targetJoinKey="SUID" targetTable="52-cc_1.to.494.txt/LOCAL_ATTRS-org.cytoscape.model.CyNode-cc_1.to.494.txt+default+node.cytable" sourceJoinKey="SUID" sourceTable="36-cc_1.to.494.txt/SHARED_ATTRS-org.cytoscape.model.CyNode-36+shared+node.cytable" sourceColumn="Genus" name="Genus"/>
        <virtualColumn immutable="false" targetJoinKey="SUID" targetTable="52-cc_1.to.494.txt/LOCAL_ATTRS-org.cytoscape.model.CyNode-cc_1.to.494.txt+default+node.cytable" sourceJoinKey="SUID" sourceTable="36-cc_1.to.494.txt/SHARED_ATTRS-org.cytoscape.model.CyNode-36+shared+node.cytable" sourceColumn="ID" name="ID"/>
        <virtualColumn immutable="false" targetJoinKey="SUID" targetTable="52-cc_1.to.494.txt/LOCAL_ATTRS-org.cytoscape.model.CyNode-cc_1.to.494.txt+default+node.cytable" sourceJoinKey="SUID" sourceTable="36-cc_1.to.494.txt/SHARED_ATTRS-org.cytoscape.model.CyNode-36+shared+node.cytable" sourceColumn="Organism" name="Organism"/>
        <virtualColumn immutable="false" targetJoinKey="SUID" targetTable="52-cc_1.to.494.txt/LOCAL_ATTRS-org.cytoscape.model.CyNode-cc_1.to.494.txt+default+node.cytable" sourceJoinKey="SUID" sourceTable="36-cc_1.to.494.txt/SHARED_ATTRS-org.cytoscape.model.CyNode-36+shared+node.cytable" sourceColumn="PPSerial" name="PPSerial"/>
        <virtualColumn immutable="false" targetJoinKey="SUID" targetTable="52-cc_1.to.494.txt/LOCAL_ATTRS-org.cytoscape.model.CyNode-cc_1.to.494.txt+default+node.cytable" sourceJoinKey="SUID" sourceTable="36-cc_1.to.494.txt/SHARED_ATTRS-org.cytoscape.model.CyNode-36+shared+node.cytable" sourceColumn="PP_TE_Distance" name="PP_TE_Distance"/>
        <virtualColumn immutable="false" targetJoinKey="SUID" targetTable="52-cc_1.to.494.txt/LOCAL_ATTRS-org.cytoscape.model.CyNode-cc_1.to.494.txt+default+node.cytable" sourceJoinKey="SUID" sourceTable="36-cc_1.to.494.txt/SHARED_ATTRS-org.cytoscape.model.CyNode-36+shared+node.cytable" sourceColumn="Prodigalscore" name="Prodigalscore"/>
        <virtualColumn immutable="false" targetJoinKey="SUID" targetTable="52-cc_1.to.494.txt/LOCAL_ATTRS-org.cytoscape.model.CyNode-cc_1.to.494.txt+default+node.cytable" sourceJoinKey="SUID" sourceTable="36-cc_1.to.494.txt/SHARED_ATTRS-org.cytoscape.model.CyNode-36+shared+node.cytable" sourceColumn="SameStrand" name="SameStrand"/>
        <virtualColumn immutable="false" targetJoinKey="SUID" targetTable="52-cc_1.to.494.txt/LOCAL_ATTRS-org.cytoscape.model.CyNode-cc_1.to.494.txt+default+node.cytable" sourceJoinKey="SUID" sourceTable="36-cc_1.to.494.txt/SHARED_ATTRS-org.cytoscape.model.CyNode-36+shared+node.cytable" sourceColumn="Sequence" name="Sequence"/>
        <virtualColumn immutable="false" targetJoinKey="SUID" targetTable="52-cc_1.to.494.txt/LOCAL_ATTRS-org.cytoscape.model.CyNode-cc_1.to.494.txt+default+node.cytable" sourceJoinKey="SUID" sourceTable="36-cc_1.to.494.txt/SHARED_ATTRS-org.cytoscape.model.CyNode-36+shared+node.cytable" sourceColumn="canonicalName" name="canonicalName"/>
        <virtualColumn immutable="false" targetJoinKey="SUID" targetTable="52-cc_1.to.494.txt/LOCAL_ATTRS-org.cytoscape.model.CyNode-cc_1.to.494.txt+default+node.cytable" sourceJoinKey="SUID" sourceTable="36-cc_1.to.494.txt/SHARED_ATTRS-org.cytoscape.model.CyNode-36+shared+node.cytable" sourceColumn="cytoscape.alias.list" name="cytoscape.alias.list"/>
        <virtualColumn immutable="false" targetJoinKey="SUID" targetTable="52-cc_1.to.494.txt/LOCAL_ATTRS-org.cytoscape.model.CyNode-cc_1.to.494.txt+default+node.cytable" sourceJoinKey="SUID" sourceTable="36-cc_1.to.494.txt/SHARED_ATTRS-org.cytoscape.model.CyNode-36+shared+node.cytable" sourceColumn="hdesc" name="hdesc"/>
        <virtualColumn immutable="false" targetJoinKey="SUID" targetTable="52-cc_1.to.494.txt/LOCAL_ATTRS-org.cytoscape.model.CyNode-cc_1.to.494.txt+default+node.cytable" sourceJoinKey="SUID" sourceTable="36-cc_1.to.494.txt/SHARED_ATTRS-org.cytoscape.model.CyNode-36+shared+node.cytable" sourceColumn="hname" name="hname"/>
        <virtualColumn immutable="false" targetJoinKey="SUID" targetTable="52-cc_1.to.494.txt/LOCAL_ATTRS-org.cytoscape.model.CyNode-cc_1.to.494.txt+default+node.cytable" sourceJoinKey="SUID" sourceTable="36-cc_1.to.494.txt/SHARED_ATTRS-org.cytoscape.model.CyNode-36+shared+node.cytable" sourceColumn="signif" name="signif"/>
        <virtualColumn immutable="false" targetJoinKey="SUID" targetTable="36-cc_1.to.494.txt/LOCAL_ATTRS-org.cytoscape.model.CyNetwork-36+default+network.cytable" sourceJoinKey="SUID" sourceTable="36-cc_1.to.494.txt/SHARED_ATTRS-org.cytoscape.model.CyNetwork-36+shared+network.cytable" sourceColumn="shared name" name="shared name"/>
        <virtualColumn immutable="false" targetJoinKey="SUID" targetTable="36-cc_1.to.494.txt/LOCAL_ATTRS-org.cytoscape.model.CyEdge-36+default+edge.cytable" sourceJoinKey="SUID" sourceTable="36-cc_1.to.494.txt/SHARED_ATTRS-org.cytoscape.model.CyEdge-36+shared+edge.cytable" sourceColumn="shared name" name="shared name"/>
        <virtualColumn immutable="false" targetJoinKey="SUID" targetTable="36-cc_1.to.494.txt/LOCAL_ATTRS-org.cytoscape.model.CyEdge-36+default+edge.cytable" sourceJoinKey="SUID" sourceTable="36-cc_1.to.494.txt/SHARED_ATTRS-org.cytoscape.model.CyEdge-36+shared+edge.cytable" sourceColumn="shared interaction" name="shared interaction"/>
        <virtualColumn immutable="false" targetJoinKey="SUID" targetTable="36-cc_1.to.494.txt/LOCAL_ATTRS-org.cytoscape.model.CyEdge-36+default+edge.cytable" sourceJoinKey="SUID" sourceTable="36-cc_1.to.494.txt/SHARED_ATTRS-org.cytoscape.model.CyEdge-36+shared+edge.cytable" sourceColumn="EVALUE" name="EVALUE"/>
        <virtualColumn immutable="false" targetJoinKey="SUID" targetTable="36-cc_1.to.494.txt/LOCAL_ATTRS-org.cytoscape.model.CyEdge-36+default+edge.cytable" sourceJoinKey="SUID" sourceTable="36-cc_1.to.494.txt/SHARED_ATTRS-org.cytoscape.model.CyEdge-36+shared+edge.cytable" sourceColumn="HIT%ID" name="HIT%ID"/>
        <virtualColumn immutable="false" targetJoinKey="SUID" targetTable="36-cc_1.to.494.txt/LOCAL_ATTRS-org.cytoscape.model.CyEdge-36+default+edge.cytable" sourceJoinKey="SUID" sourceTable="36-cc_1.to.494.txt/SHARED_ATTRS-org.cytoscape.model.CyEdge-36+shared+edge.cytable" sourceColumn="MIN_COV_OPT" name="MIN_COV_OPT"/>
        <virtualColumn immutable="false" targetJoinKey="SUID" targetTable="36-cc_1.to.494.txt/LOCAL_ATTRS-org.cytoscape.model.CyEdge-36+default+edge.cytable" sourceJoinKey="SUID" sourceTable="36-cc_1.to.494.txt/SHARED_ATTRS-org.cytoscape.model.CyEdge-36+shared+edge.cytable" sourceColumn="SS%ID" name="SS%ID"/>
        <virtualColumn immutable="false" targetJoinKey="SUID" targetTable="36-cc_1.to.494.txt/LOCAL_ATTRS-org.cytoscape.model.CyEdge-36+default+edge.cytable" sourceJoinKey="SUID" sourceTable="36-cc_1.to.494.txt/SHARED_ATTRS-org.cytoscape.model.CyEdge-36+shared+edge.cytable" sourceColumn="canonicalName" name="canonicalName"/>
        <virtualColumn immutable="false" targetJoinKey="SUID" targetTable="52-cc_1.to.494.txt/LOCAL_ATTRS-org.cytoscape.model.CyEdge-cc_1.to.494.txt+default+edge.cytable" sourceJoinKey="SUID" sourceTable="36-cc_1.to.494.txt/SHARED_ATTRS-org.cytoscape.model.CyEdge-36+shared+edge.cytable" sourceColumn="shared name" name="shared name"/>
        <virtualColumn immutable="false" targetJoinKey="SUID" targetTable="52-cc_1.to.494.txt/LOCAL_ATTRS-org.cytoscape.model.CyEdge-cc_1.to.494.txt+default+edge.cytable" sourceJoinKey="SUID" sourceTable="36-cc_1.to.494.txt/SHARED_ATTRS-org.cytoscape.model.CyEdge-36+shared+edge.cytable" sourceColumn="shared interaction" name="shared interaction"/>
        <virtualColumn immutable="false" targetJoinKey="SUID" targetTable="52-cc_1.to.494.txt/LOCAL_ATTRS-org.cytoscape.model.CyEdge-cc_1.to.494.txt+default+edge.cytable" sourceJoinKey="SUID" sourceTable="36-cc_1.to.494.txt/SHARED_ATTRS-org.cytoscape.model.CyEdge-36+shared+edge.cytable" sourceColumn="EVALUE" name="EVALUE"/>
        <virtualColumn immutable="false" targetJoinKey="SUID" targetTable="52-cc_1.to.494.txt/LOCAL_ATTRS-org.cytoscape.model.CyEdge-cc_1.to.494.txt+default+edge.cytable" sourceJoinKey="SUID" sourceTable="36-cc_1.to.494.txt/SHARED_ATTRS-org.cytoscape.model.CyEdge-36+shared+edge.cytable" sourceColumn="HIT%ID" name="HIT%ID"/>
        <virtualColumn immutable="false" targetJoinKey="SUID" targetTable="52-cc_1.to.494.txt/LOCAL_ATTRS-org.cytoscape.model.CyEdge-cc_1.to.494.txt+default+edge.cytable" sourceJoinKey="SUID" sourceTable="36-cc_1.to.494.txt/SHARED_ATTRS-org.cytoscape.model.CyEdge-36+shared+edge.cytable" sourceColumn="MIN_COV_OPT" name="MIN_COV_OPT"/>
        <virtualColumn immutable="false" targetJoinKey="SUID" targetTable="52-cc_1.to.494.txt/LOCAL_ATTRS-org.cytoscape.model.CyEdge-cc_1.to.494.txt+default+edge.cytable" sourceJoinKey="SUID" sourceTable="36-cc_1.to.494.txt/SHARED_ATTRS-org.cytoscape.model.CyEdge-36+shared+edge.cytable" sourceColumn="SS%ID" name="SS%ID"/>
        <virtualColumn immutable="false" targetJoinKey="SUID" targetTable="52-cc_1.to.494.txt/LOCAL_ATTRS-org.cytoscape.model.CyEdge-cc_1.to.494.txt+default+edge.cytable" sourceJoinKey="SUID" sourceTable="36-cc_1.to.494.txt/SHARED_ATTRS-org.cytoscape.model.CyEdge-36+shared+edge.cytable" sourceColumn="canonicalName" name="canonicalName"/>
        <virtualColumn immutable="false" targetJoinKey="SUID" targetTable="36-cc_1.to.494.txt/LOCAL_ATTRS-org.cytoscape.model.CyNode-36+default+node.cytable" sourceJoinKey="SUID" sourceTable="36-cc_1.to.494.txt/SHARED_ATTRS-org.cytoscape.model.CyNode-36+shared+node.cytable" sourceColumn="shared name" name="shared name"/>
        <virtualColumn immutable="false" targetJoinKey="SUID" targetTable="36-cc_1.to.494.txt/LOCAL_ATTRS-org.cytoscape.model.CyNode-36+default+node.cytable" sourceJoinKey="SUID" sourceTable="36-cc_1.to.494.txt/SHARED_ATTRS-org.cytoscape.model.CyNode-36+shared+node.cytable" sourceColumn="Accession" name="Accession"/>
        <virtualColumn immutable="false" targetJoinKey="SUID" targetTable="36-cc_1.to.494.txt/LOCAL_ATTRS-org.cytoscape.model.CyNode-36+default+node.cytable" sourceJoinKey="SUID" sourceTable="36-cc_1.to.494.txt/SHARED_ATTRS-org.cytoscape.model.CyNode-36+shared+node.cytable" sourceColumn="Genus" name="Genus"/>
        <virtualColumn immutable="false" targetJoinKey="SUID" targetTable="36-cc_1.to.494.txt/LOCAL_ATTRS-org.cytoscape.model.CyNode-36+default+node.cytable" sourceJoinKey="SUID" sourceTable="36-cc_1.to.494.txt/SHARED_ATTRS-org.cytoscape.model.CyNode-36+shared+node.cytable" sourceColumn="ID" name="ID"/>
        <virtualColumn immutable="false" targetJoinKey="SUID" targetTable="36-cc_1.to.494.txt/LOCAL_ATTRS-org.cytoscape.model.CyNode-36+default+node.cytable" sourceJoinKey="SUID" sourceTable="36-cc_1.to.494.txt/SHARED_ATTRS-org.cytoscape.model.CyNode-36+shared+node.cytable" sourceColumn="Organism" name="Organism"/>
        <virtualColumn immutable="false" targetJoinKey="SUID" targetTable="36-cc_1.to.494.txt/LOCAL_ATTRS-org.cytoscape.model.CyNode-36+default+node.cytable" sourceJoinKey="SUID" sourceTable="36-cc_1.to.494.txt/SHARED_ATTRS-org.cytoscape.model.CyNode-36+shared+node.cytable" sourceColumn="PPSerial" name="PPSerial"/>
        <virtualColumn immutable="false" targetJoinKey="SUID" targetTable="36-cc_1.to.494.txt/LOCAL_ATTRS-org.cytoscape.model.CyNode-36+default+node.cytable" sourceJoinKey="SUID" sourceTable="36-cc_1.to.494.txt/SHARED_ATTRS-org.cytoscape.model.CyNode-36+shared+node.cytable" sourceColumn="PP_TE_Distance" name="PP_TE_Distance"/>
        <virtualColumn immutable="false" targetJoinKey="SUID" targetTable="36-cc_1.to.494.txt/LOCAL_ATTRS-org.cytoscape.model.CyNode-36+default+node.cytable" sourceJoinKey="SUID" sourceTable="36-cc_1.to.494.txt/SHARED_ATTRS-org.cytoscape.model.CyNode-36+shared+node.cytable" sourceColumn="Prodigalscore" name="Prodigalscore"/>
        <virtualColumn immutable="false" targetJoinKey="SUID" targetTable="36-cc_1.to.494.txt/LOCAL_ATTRS-org.cytoscape.model.CyNode-36+default+node.cytable" sourceJoinKey="SUID" sourceTable="36-cc_1.to.494.txt/SHARED_ATTRS-org.cytoscape.model.CyNode-36+shared+node.cytable" sourceColumn="SameStrand" name="SameStrand"/>
        <virtualColumn immutable="false" targetJoinKey="SUID" targetTable="36-cc_1.to.494.txt/LOCAL_ATTRS-org.cytoscape.model.CyNode-36+default+node.cytable" sourceJoinKey="SUID" sourceTable="36-cc_1.to.494.txt/SHARED_ATTRS-org.cytoscape.model.CyNode-36+shared+node.cytable" sourceColumn="Sequence" name="Sequence"/>
        <virtualColumn immutable="false" targetJoinKey="SUID" targetTable="36-cc_1.to.494.txt/LOCAL_ATTRS-org.cytoscape.model.CyNode-36+default+node.cytable" sourceJoinKey="SUID" sourceTable="36-cc_1.to.494.txt/SHARED_ATTRS-org.cytoscape.model.CyNode-36+shared+node.cytable" sourceColumn="canonicalName" name="canonicalName"/>
        <virtualColumn immutable="false" targetJoinKey="SUID" targetTable="36-cc_1.to.494.txt/LOCAL_ATTRS-org.cytoscape.model.CyNode-36+default+node.cytable" sourceJoinKey="SUID" sourceTable="36-cc_1.to.494.txt/SHARED_ATTRS-org.cytoscape.model.CyNode-36+shared+node.cytable" sourceColumn="cytoscape.alias.list" name="cytoscape.alias.list"/>
        <virtualColumn immutable="false" targetJoinKey="SUID" targetTable="36-cc_1.to.494.txt/LOCAL_ATTRS-org.cytoscape.model.CyNode-36+default+node.cytable" sourceJoinKey="SUID" sourceTable="36-cc_1.to.494.txt/SHARED_ATTRS-org.cytoscape.model.CyNode-36+shared+node.cytable" sourceColumn="hdesc" name="hdesc"/>
        <virtualColumn immutable="false" targetJoinKey="SUID" targetTable="36-cc_1.to.494.txt/LOCAL_ATTRS-org.cytoscape.model.CyNode-36+default+node.cytable" sourceJoinKey="SUID" sourceTable="36-cc_1.to.494.txt/SHARED_ATTRS-org.cytoscape.model.CyNode-36+shared+node.cytable" sourceColumn="hname" name="hname"/>
        <virtualColumn immutable="false" targetJoinKey="SUID" targetTable="36-cc_1.to.494.txt/LOCAL_ATTRS-org.cytoscape.model.CyNode-36+default+node.cytable" sourceJoinKey="SUID" sourceTable="36-cc_1.to.494.txt/SHARED_ATTRS-org.cytoscape.model.CyNode-36+shared+node.cytable" sourceColumn="signif" name="signif"/>
    </virtualColumns>
</cyTables>
