# Supplementary material for: Discovery and characterisation of an amidine-containing ribosomally-synthesised peptide that is widely distributed in nature
Source: Royal Society of Chemistry journal article supplement (doi:10.1039/d1sc01456k), 2021-01-01
Supplement: d1sc01456k2.cys [file d1sc01456k2.cys › CytoscapeSession-2019_12_19-13_30/views/52-29794-cc_1.to.494.txt.xgmml]

<?xml version="1.0" encoding="UTF-8" standalone="yes"?>
<graph id="29794" label="cc_1.to.494.txt" cy:view="1" cy:networkId="52" cy:visualStyle="Solid" cy:rendererId="org.cytoscape.ding" cy:documentVersion="3.0" xmlns:dc="http://purl.org/dc/elements/1.1/" xmlns:xlink="http://www.w3.org/1999/xlink" xmlns:rdf="http://www.w3.org/1999/02/22-rdf-syntax-ns#" xmlns:cy="http://www.cytoscape.org" xmlns="http://www.cs.rpi.edu/XGMML">
  <graphics>
    <att name="NETWORK_WIDTH" value="1013.0" type="string" cy:type="String"/>
    <att name="NETWORK_HEIGHT" value="481.0" type="string" cy:type="String"/>
    <att name="NETWORK_DEPTH" value="0.0" type="string" cy:type="String"/>
    <att name="NETWORK_EDGE_SELECTION" value="true" type="string" cy:type="String"/>
    <att name="NETWORK_TITLE" value="cc_1.to.494.txt" type="string" cy:type="String"/>
    <att name="NETWORK_NODE_SELECTION" value="true" type="string" cy:type="String"/>
    <att name="NETWORK_SCALE_FACTOR" value="0.08278573956908165" type="string" cy:type="String"/>
    <att name="NETWORK_CENTER_X_LOCATION" value="3644.355163236039" type="string" cy:type="String"/>
    <att name="NETWORK_CENTER_Z_LOCATION" value="0.0" type="string" cy:type="String"/>
    <att name="NETWORK_CENTER_Y_LOCATION" value="1907.84966870383" type="string" cy:type="String"/>
    <att name="NODE_SIZE_LOCKED" value="true" type="string" cy:type="String"/>
  </graphics>
  <node id="32287" label="WP_133246044_2" cy:nodeId="62">
    <graphics x="1492.7042236328125" z="0.0" y="4631.8564453125"/>
  </node>
  <node id="32286" label="PWF27333_2" cy:nodeId="63">
    <graphics x="1495.0257568359375" z="0.0" y="4524.1171875"/>
  </node>
  <node id="32285" label="WP_066215709_2" cy:nodeId="64">
    <graphics x="1595.0257568359375" z="0.0" y="4631.8564453125"/>
  </node>
  <node id="32284" label="SEC29390_2" cy:nodeId="65">
    <graphics x="1597.347412109375" z="0.0" y="4524.1171875"/>
  </node>
  <node id="32283" label="PDQ36093_4" cy:nodeId="66">
    <graphics x="1697.347412109375" z="0.0" y="4631.8564453125"/>
  </node>
  <node id="32282" label="PDQ36095_3" cy:nodeId="67">
    <graphics x="1699.6689453125" z="0.0" y="4524.1171875"/>
  </node>
  <node id="32281" label="WP_105032337_3" cy:nodeId="68">
    <graphics x="1799.6689453125" z="0.0" y="4631.8564453125"/>
  </node>
  <node id="32280" label="WP_104181080_3" cy:nodeId="69">
    <graphics x="1801.9906005859375" z="0.0" y="4524.1171875"/>
  </node>
  <node id="32279" label="WP_107778338_3" cy:nodeId="70">
    <graphics x="1901.9906005859375" z="0.0" y="4631.8564453125"/>
  </node>
  <node id="32278" label="WP_107778339_3" cy:nodeId="71">
    <graphics x="1904.3121337890625" z="0.0" y="4524.1171875"/>
  </node>
  <node id="32277" label="AGL26862_1" cy:nodeId="72">
    <graphics x="2004.3121337890625" z="0.0" y="4631.8564453125"/>
  </node>
  <node id="32276" label="COV81994_2" cy:nodeId="73">
    <graphics x="2006.6337890625" z="0.0" y="4524.1171875"/>
  </node>
  <node id="32275" label="WP_083091741_1" cy:nodeId="74">
    <graphics x="2106.6337890625" z="0.0" y="4631.8564453125"/>
  </node>
  <node id="32274" label="WP_090039557_6" cy:nodeId="75">
    <graphics x="2108.955322265625" z="0.0" y="4524.1171875"/>
  </node>
  <node id="32273" label="WP_017177815_2" cy:nodeId="76">
    <graphics x="2208.955322265625" z="0.0" y="4631.8564453125"/>
  </node>
  <node id="32272" label="WP_073452776_1" cy:nodeId="77">
    <graphics x="2211.27685546875" z="0.0" y="4524.1171875"/>
  </node>
  <node id="32271" label="REH37226_1" cy:nodeId="78">
    <graphics x="2311.27685546875" z="0.0" y="4631.8564453125"/>
  </node>
  <node id="32270" label="WP_084580442_1" cy:nodeId="79">
    <graphics x="2313.5986328125" z="0.0" y="4524.1171875"/>
  </node>
  <node id="32269" label="WP_131735418_1" cy:nodeId="80">
    <graphics x="2413.5986328125" z="0.0" y="4631.8564453125"/>
  </node>
  <node id="32268" label="WP_103341360_1" cy:nodeId="81">
    <graphics x="2415.920166015625" z="0.0" y="4524.1171875"/>
  </node>
  <node id="32267" label="WP_131785729_4" cy:nodeId="82">
    <graphics x="2515.920166015625" z="0.0" y="4631.8564453125"/>
  </node>
  <node id="32266" label="WP_131785730_4" cy:nodeId="83">
    <graphics x="2518.24169921875" z="0.0" y="4524.1171875"/>
  </node>
  <node id="32265" label="WP_123601960_4" cy:nodeId="84">
    <graphics x="2618.24169921875" z="0.0" y="4631.8564453125"/>
  </node>
  <node id="32264" label="WP_123601959_4" cy:nodeId="85">
    <graphics x="2620.563232421875" z="0.0" y="4524.1171875"/>
  </node>
  <node id="32263" label="WP_121183327_1" cy:nodeId="86">
    <graphics x="2720.563232421875" z="0.0" y="4631.8564453125"/>
  </node>
  <node id="32262" label="WP_053619387_1" cy:nodeId="87">
    <graphics x="2722.885009765625" z="0.0" y="4524.1171875"/>
  </node>
  <node id="32261" label="WP_095563712_2" cy:nodeId="88">
    <graphics x="2822.885009765625" z="0.0" y="4631.8564453125"/>
  </node>
  <node id="32260" label="WP_095563712_3" cy:nodeId="89">
    <graphics x="2825.20654296875" z="0.0" y="4524.1171875"/>
  </node>
  <node id="32259" label="WP_073785992_3" cy:nodeId="90">
    <graphics x="2925.20654296875" z="0.0" y="4631.8564453125"/>
  </node>
  <node id="32258" label="OKH95170_3" cy:nodeId="91">
    <graphics x="2927.528076171875" z="0.0" y="4524.1171875"/>
  </node>
  <node id="32257" label="WP_126382827_4" cy:nodeId="92">
    <graphics x="3027.528076171875" z="0.0" y="4631.8564453125"/>
  </node>
  <node id="32256" label="WP_126382826_3" cy:nodeId="93">
    <graphics x="3029.849609375" z="0.0" y="4524.1171875"/>
  </node>
  <node id="32255" label="OKI12399_2" cy:nodeId="94">
    <graphics x="3129.849609375" z="0.0" y="4631.8564453125"/>
  </node>
  <node id="32254" label="WP_083609312_2" cy:nodeId="95">
    <graphics x="3132.171142578125" z="0.0" y="4524.1171875"/>
  </node>
  <node id="32253" label="WP_100045344_3" cy:nodeId="96">
    <graphics x="3232.171142578125" z="0.0" y="4631.8564453125"/>
  </node>
  <node id="32252" label="WP_121405200_3" cy:nodeId="97">
    <graphics x="3234.492919921875" z="0.0" y="4524.1171875"/>
  </node>
  <node id="32251" label="AXK36690_3" cy:nodeId="98">
    <graphics x="3334.492919921875" z="0.0" y="4631.8564453125"/>
  </node>
  <node id="32250" label="AXK36692_2" cy:nodeId="99">
    <graphics x="3336.814453125" z="0.0" y="4524.1171875"/>
  </node>
  <node id="32249" label="WP_116026137_1" cy:nodeId="100">
    <graphics x="3436.814453125" z="0.0" y="4631.8564453125"/>
  </node>
  <node id="32248" label="WP_116026136_1" cy:nodeId="101">
    <graphics x="3439.135986328125" z="0.0" y="4524.1171875"/>
  </node>
  <node id="32247" label="PKV33869_5" cy:nodeId="102">
    <graphics x="3539.135986328125" z="0.0" y="4631.8564453125"/>
  </node>
  <node id="32246" label="WP_111334328_1" cy:nodeId="103">
    <graphics x="3541.45751953125" z="0.0" y="4524.1171875"/>
  </node>
  <node id="32245" label="WP_083113299_2" cy:nodeId="104">
    <graphics x="3641.45751953125" z="0.0" y="4631.8564453125"/>
  </node>
  <node id="32244" label="WP_085670625_1" cy:nodeId="105">
    <graphics x="3643.779296875" z="0.0" y="4524.1171875"/>
  </node>
  <node id="32243" label="WP_081384789_3" cy:nodeId="106">
    <graphics x="3743.779296875" z="0.0" y="4631.8564453125"/>
  </node>
  <node id="32242" label="WP_075410821_2" cy:nodeId="107">
    <graphics x="3746.100830078125" z="0.0" y="4524.1171875"/>
  </node>
  <node id="32241" label="WP_035849418_4" cy:nodeId="108">
    <graphics x="3846.100830078125" z="0.0" y="4631.8564453125"/>
  </node>
  <node id="32240" label="WP_035849420_7" cy:nodeId="109">
    <graphics x="3848.42236328125" z="0.0" y="4524.1171875"/>
  </node>
  <node id="32239" label="WP_116154877_3" cy:nodeId="110">
    <graphics x="3948.42236328125" z="0.0" y="4631.8564453125"/>
  </node>
  <node id="32238" label="RED74809_3" cy:nodeId="111">
    <graphics x="3950.743896484375" z="0.0" y="4524.1171875"/>
  </node>
  <node id="32237" label="WP_018962008_8" cy:nodeId="112">
    <graphics x="4050.743896484375" z="0.0" y="4631.8564453125"/>
  </node>
  <node id="32236" label="WP_018962008_5" cy:nodeId="113">
    <graphics x="4053.065673828125" z="0.0" y="4524.1171875"/>
  </node>
  <node id="32235" label="WP_061921822_1" cy:nodeId="114">
    <graphics x="4153.0654296875" z="0.0" y="4631.8564453125"/>
  </node>
  <node id="32234" label="WP_065164254_4" cy:nodeId="115">
    <graphics x="4155.38720703125" z="0.0" y="4524.1171875"/>
  </node>
  <node id="32233" label="RSM56874_1" cy:nodeId="116">
    <graphics x="4255.38720703125" z="0.0" y="4631.8564453125"/>
  </node>
  <node id="32232" label="WP_125807935_1" cy:nodeId="117">
    <graphics x="4257.708984375" z="0.0" y="4524.1171875"/>
  </node>
  <node id="32231" label="WP_111862862_1" cy:nodeId="118">
    <graphics x="4357.708984375" z="0.0" y="4631.8564453125"/>
  </node>
  <node id="32230" label="WP_111862863_1" cy:nodeId="119">
    <graphics x="4360.0302734375" z="0.0" y="4524.1171875"/>
  </node>
  <node id="32229" label="WP_086858376_3" cy:nodeId="120">
    <graphics x="4460.0302734375" z="0.0" y="4631.8564453125"/>
  </node>
  <node id="32228" label="WP_086858376_4" cy:nodeId="121">
    <graphics x="4462.35205078125" z="0.0" y="4524.1171875"/>
  </node>
  <node id="32227" label="WP_060180042_2" cy:nodeId="122">
    <graphics x="4562.35205078125" z="0.0" y="4631.8564453125"/>
  </node>
  <node id="32226" label="WP_076045700_1" cy:nodeId="123">
    <graphics x="4564.67333984375" z="0.0" y="4524.1171875"/>
  </node>
  <node id="32225" label="ERK54887_1" cy:nodeId="124">
    <graphics x="4664.67333984375" z="0.0" y="4631.8564453125"/>
  </node>
  <node id="32224" label="WP_081707409_1" cy:nodeId="125">
    <graphics x="4666.9951171875" z="0.0" y="4524.1171875"/>
  </node>
  <node id="32223" label="WP_104263679_3" cy:nodeId="126">
    <graphics x="4766.9951171875" z="0.0" y="4631.8564453125"/>
  </node>
  <node id="32222" label="WP_097165202_2" cy:nodeId="127">
    <graphics x="4769.31689453125" z="0.0" y="4524.1171875"/>
  </node>
  <node id="32221" label="EJJ05688_1" cy:nodeId="128">
    <graphics x="4869.31689453125" z="0.0" y="4631.8564453125"/>
  </node>
  <node id="32220" label="WP_040899039_1" cy:nodeId="129">
    <graphics x="4871.63818359375" z="0.0" y="4524.1171875"/>
  </node>
  <node id="32219" label="SGI74060_3" cy:nodeId="130">
    <graphics x="4971.63818359375" z="0.0" y="4631.8564453125"/>
  </node>
  <node id="32218" label="WP_079180155_3" cy:nodeId="131">
    <graphics x="4973.9599609375" z="0.0" y="4524.1171875"/>
  </node>
  <node id="32217" label="KJK44488_2" cy:nodeId="132">
    <graphics x="5073.9599609375" z="0.0" y="4631.8564453125"/>
  </node>
  <node id="32216" label="WP_082115066_2" cy:nodeId="133">
    <graphics x="5076.28125" z="0.0" y="4524.1171875"/>
  </node>
  <node id="32215" label="WP_053729792_4" cy:nodeId="134">
    <graphics x="0.0" z="0.0" y="4862.71484375"/>
  </node>
  <node id="32214" label="WP_053729790_4" cy:nodeId="135">
    <graphics x="2.3215904235839844" z="0.0" y="4754.9755859375"/>
  </node>
  <node id="32213" label="OJV24806_2" cy:nodeId="136">
    <graphics x="102.32159423828125" z="0.0" y="4862.71484375"/>
  </node>
  <node id="32212" label="OJV24808_1" cy:nodeId="137">
    <graphics x="104.64318084716797" z="0.0" y="4754.9755859375"/>
  </node>
  <node id="32211" label="RED74809_2" cy:nodeId="138">
    <graphics x="204.6431884765625" z="0.0" y="4862.71484375"/>
  </node>
  <node id="32210" label="WP_116154877_2" cy:nodeId="139">
    <graphics x="206.9647674560547" z="0.0" y="4754.9755859375"/>
  </node>
  <node id="32209" label="SFB39971_2" cy:nodeId="140">
    <graphics x="306.96478271484375" z="0.0" y="4862.71484375"/>
  </node>
  <node id="32208" label="WP_091674323_2" cy:nodeId="141">
    <graphics x="309.286376953125" z="0.0" y="4754.9755859375"/>
  </node>
  <node id="32207" label="WP_045196822_3" cy:nodeId="142">
    <graphics x="409.286376953125" z="0.0" y="4862.71484375"/>
  </node>
  <node id="32206" label="KZE98020_3" cy:nodeId="143">
    <graphics x="411.6079406738281" z="0.0" y="4754.9755859375"/>
  </node>
  <node id="32205" label="WP_067908345_2" cy:nodeId="144">
    <graphics x="511.60797119140625" z="0.0" y="4862.71484375"/>
  </node>
  <node id="32204" label="AFJ68075_2" cy:nodeId="145">
    <graphics x="513.9295654296875" z="0.0" y="4754.9755859375"/>
  </node>
  <node id="32203" label="EWC60518_2" cy:nodeId="146">
    <graphics x="613.9295654296875" z="0.0" y="4862.71484375"/>
  </node>
  <node id="32202" label="WP_054046275_1" cy:nodeId="147">
    <graphics x="616.2511596679688" z="0.0" y="4754.9755859375"/>
  </node>
  <node id="32201" label="WP_116110588_2" cy:nodeId="148">
    <graphics x="716.2511596679688" z="0.0" y="4862.71484375"/>
  </node>
  <node id="32200" label="WP_094002561_2" cy:nodeId="149">
    <graphics x="718.57275390625" z="0.0" y="4754.9755859375"/>
  </node>
  <node id="32199" label="GAQ65395_1" cy:nodeId="150">
    <graphics x="818.57275390625" z="0.0" y="4862.71484375"/>
  </node>
  <node id="32198" label="WP_059082757_1" cy:nodeId="151">
    <graphics x="820.894287109375" z="0.0" y="4754.9755859375"/>
  </node>
  <node id="32197" label="WP_091371144_1" cy:nodeId="152">
    <graphics x="920.894287109375" z="0.0" y="4862.71484375"/>
  </node>
  <node id="32196" label="WP_054049769_2" cy:nodeId="153">
    <graphics x="923.2158813476562" z="0.0" y="4754.9755859375"/>
  </node>
  <node id="32195" label="WP_053729790_3" cy:nodeId="154">
    <graphics x="1023.2159423828125" z="0.0" y="4862.71484375"/>
  </node>
  <node id="32194" label="WP_053729792_3" cy:nodeId="155">
    <graphics x="1025.5374755859375" z="0.0" y="4754.9755859375"/>
  </node>
  <node id="32193" label="ONI75210_1" cy:nodeId="156">
    <graphics x="1125.5374755859375" z="0.0" y="4862.71484375"/>
  </node>
  <node id="32192" label="WP_083753877_1" cy:nodeId="157">
    <graphics x="1127.859130859375" z="0.0" y="4754.9755859375"/>
  </node>
  <node id="32191" label="WP_042407643_3" cy:nodeId="158">
    <graphics x="1227.859130859375" z="0.0" y="4862.71484375"/>
  </node>
  <node id="32190" label="WP_042407643_4" cy:nodeId="159">
    <graphics x="1230.1806640625" z="0.0" y="4754.9755859375"/>
  </node>
  <node id="32189" label="WP_027737668_1" cy:nodeId="160">
    <graphics x="1330.1806640625" z="0.0" y="4862.71484375"/>
  </node>
  <node id="32188" label="WP_027737671_1" cy:nodeId="161">
    <graphics x="1332.5023193359375" z="0.0" y="4754.9755859375"/>
  </node>
  <node id="32187" label="WP_086461444_2" cy:nodeId="162">
    <graphics x="1432.5023193359375" z="0.0" y="4862.71484375"/>
  </node>
  <node id="32186" label="WP_086461443_2" cy:nodeId="163">
    <graphics x="1434.8238525390625" z="0.0" y="4754.9755859375"/>
  </node>
  <node id="32185" label="WP_083982727_2" cy:nodeId="164">
    <graphics x="1534.8238525390625" z="0.0" y="4862.71484375"/>
  </node>
  <node id="32184" label="WP_080564860_3" cy:nodeId="165">
    <graphics x="1537.1455078125" z="0.0" y="4754.9755859375"/>
  </node>
  <node id="32183" label="WP_054213495_2" cy:nodeId="166">
    <graphics x="1637.1455078125" z="0.0" y="4862.71484375"/>
  </node>
  <node id="32182" label="KPI20077_2" cy:nodeId="167">
    <graphics x="1639.467041015625" z="0.0" y="4754.9755859375"/>
  </node>
  <node id="32181" label="WP_018637157_1" cy:nodeId="168">
    <graphics x="1739.467041015625" z="0.0" y="4862.71484375"/>
  </node>
  <node id="32180" label="WP_054569301_1" cy:nodeId="169">
    <graphics x="1741.78857421875" z="0.0" y="4754.9755859375"/>
  </node>
  <node id="32179" label="WP_064110435_3" cy:nodeId="170">
    <graphics x="1841.78857421875" z="0.0" y="4862.71484375"/>
  </node>
  <node id="32178" label="WP_090039557_3" cy:nodeId="171">
    <graphics x="1844.1102294921875" z="0.0" y="4754.9755859375"/>
  </node>
  <node id="32177" label="EPJ34556_2" cy:nodeId="172">
    <graphics x="1944.1102294921875" z="0.0" y="4862.71484375"/>
  </node>
  <node id="32176" label="WP_082320087_1" cy:nodeId="173">
    <graphics x="1946.4317626953125" z="0.0" y="4754.9755859375"/>
  </node>
  <node id="32175" label="KJK44488_1" cy:nodeId="174">
    <graphics x="2046.431884765625" z="0.0" y="4862.71484375"/>
  </node>
  <node id="32174" label="WP_082115066_1" cy:nodeId="175">
    <graphics x="2048.75341796875" z="0.0" y="4754.9755859375"/>
  </node>
  <node id="32173" label="WP_089507734_1" cy:nodeId="176">
    <graphics x="2148.75341796875" z="0.0" y="4862.71484375"/>
  </node>
  <node id="32172" label="OXL32905_1" cy:nodeId="177">
    <graphics x="2151.074951171875" z="0.0" y="4754.9755859375"/>
  </node>
  <node id="32171" label="KTR94659_1" cy:nodeId="178">
    <graphics x="2251.074951171875" z="0.0" y="4862.71484375"/>
  </node>
  <node id="32170" label="WP_081323045_1" cy:nodeId="179">
    <graphics x="2253.396484375" z="0.0" y="4754.9755859375"/>
  </node>
  <node id="32169" label="WP_078561279_1" cy:nodeId="180">
    <graphics x="2353.396484375" z="0.0" y="4862.71484375"/>
  </node>
  <node id="32168" label="EFL12569_1" cy:nodeId="181">
    <graphics x="2355.71826171875" z="0.0" y="4754.9755859375"/>
  </node>
  <node id="32167" label="WP_028567914_2" cy:nodeId="182">
    <graphics x="2455.71826171875" z="0.0" y="4862.71484375"/>
  </node>
  <node id="32166" label="SFD04819_1" cy:nodeId="183">
    <graphics x="2458.039794921875" z="0.0" y="4754.9755859375"/>
  </node>
  <node id="32165" label="SDE31545_3" cy:nodeId="184">
    <graphics x="2558.039794921875" z="0.0" y="4862.71484375"/>
  </node>
  <node id="32164" label="WP_097276114_3" cy:nodeId="185">
    <graphics x="2560.361328125" z="0.0" y="4754.9755859375"/>
  </node>
  <node id="32163" label="WP_124913393_2" cy:nodeId="186">
    <graphics x="2660.361328125" z="0.0" y="4862.71484375"/>
  </node>
  <node id="32162" label="OKL50794_1" cy:nodeId="187">
    <graphics x="2662.682861328125" z="0.0" y="4754.9755859375"/>
  </node>
  <node id="32161" label="SBT66104_1" cy:nodeId="188">
    <graphics x="2762.682861328125" z="0.0" y="4862.71484375"/>
  </node>
  <node id="32160" label="WP_098744376_1" cy:nodeId="189">
    <graphics x="2765.004638671875" z="0.0" y="4754.9755859375"/>
  </node>
  <node id="32159" label="WP_004017479_2" cy:nodeId="190">
    <graphics x="2865.004638671875" z="0.0" y="4862.71484375"/>
  </node>
  <node id="32158" label="EEZ91469_3" cy:nodeId="191">
    <graphics x="2867.326171875" z="0.0" y="4754.9755859375"/>
  </node>
  <node id="32157" label="WP_066216109_1" cy:nodeId="192">
    <graphics x="2967.326171875" z="0.0" y="4862.71484375"/>
  </node>
  <node id="32156" label="WP_107004474_2" cy:nodeId="193">
    <graphics x="2969.647705078125" z="0.0" y="4754.9755859375"/>
  </node>
  <node id="32155" label="WP_086513414_2" cy:nodeId="194">
    <graphics x="3069.647705078125" z="0.0" y="4862.71484375"/>
  </node>
  <node id="32154" label="WP_086513413_2" cy:nodeId="195">
    <graphics x="3071.96923828125" z="0.0" y="4754.9755859375"/>
  </node>
  <node id="32153" label="WP_033342998_1" cy:nodeId="196">
    <graphics x="3171.96923828125" z="0.0" y="4862.71484375"/>
  </node>
  <node id="32152" label="WP_123603612_3" cy:nodeId="197">
    <graphics x="3174.291015625" z="0.0" y="4754.9755859375"/>
  </node>
  <node id="32151" label="WP_045877303_3" cy:nodeId="198">
    <graphics x="3274.291015625" z="0.0" y="4862.71484375"/>
  </node>
  <node id="32150" label="WP_084011357_3" cy:nodeId="199">
    <graphics x="3276.612548828125" z="0.0" y="4754.9755859375"/>
  </node>
  <node id="32149" label="WP_131736173_1" cy:nodeId="200">
    <graphics x="3376.612548828125" z="0.0" y="4862.71484375"/>
  </node>
  <node id="32148" label="WP_051751858_2" cy:nodeId="201">
    <graphics x="3378.93408203125" z="0.0" y="4754.9755859375"/>
  </node>
  <node id="32147" label="WP_092779820_3" cy:nodeId="202">
    <graphics x="3478.93408203125" z="0.0" y="4862.71484375"/>
  </node>
  <node id="32146" label="WP_121394015_3" cy:nodeId="203">
    <graphics x="3481.255615234375" z="0.0" y="4754.9755859375"/>
  </node>
  <node id="32145" label="WP_123971014_1" cy:nodeId="204">
    <graphics x="3581.255615234375" z="0.0" y="4862.71484375"/>
  </node>
  <node id="32144" label="RPF24868_1" cy:nodeId="205">
    <graphics x="3583.5771484375" z="0.0" y="4754.9755859375"/>
  </node>
  <node id="32143" label="KKF03247_1" cy:nodeId="206">
    <graphics x="3683.5771484375" z="0.0" y="4862.71484375"/>
  </node>
  <node id="32142" label="WP_064282747_1" cy:nodeId="207">
    <graphics x="3685.89892578125" z="0.0" y="4754.9755859375"/>
  </node>
  <node id="32141" label="WP_073387576_3" cy:nodeId="208">
    <graphics x="3785.89892578125" z="0.0" y="4862.71484375"/>
  </node>
  <node id="32140" label="WP_081907113_2" cy:nodeId="209">
    <graphics x="3788.220458984375" z="0.0" y="4754.9755859375"/>
  </node>
  <node id="32139" label="WP_035861760_3" cy:nodeId="210">
    <graphics x="3888.220458984375" z="0.0" y="4862.71484375"/>
  </node>
  <node id="32138" label="EXG81129_3" cy:nodeId="211">
    <graphics x="3890.5419921875" z="0.0" y="4754.9755859375"/>
  </node>
  <node id="32137" label="OKH95170_1" cy:nodeId="212">
    <graphics x="3990.5419921875" z="0.0" y="4862.71484375"/>
  </node>
  <node id="32136" label="WP_073785992_1" cy:nodeId="213">
    <graphics x="3992.863525390625" z="0.0" y="4754.9755859375"/>
  </node>
  <node id="32135" label="SBN62121_1" cy:nodeId="214">
    <graphics x="4092.86376953125" z="0.0" y="4862.71484375"/>
  </node>
  <node id="32134" label="WP_111209344_2" cy:nodeId="215">
    <graphics x="4095.18505859375" z="0.0" y="4754.9755859375"/>
  </node>
  <node id="32133" label="CAM04239_1" cy:nodeId="216">
    <graphics x="4195.18505859375" z="0.0" y="4862.71484375"/>
  </node>
  <node id="32132" label="WP_009951067_1" cy:nodeId="217">
    <graphics x="4197.5068359375" z="0.0" y="4754.9755859375"/>
  </node>
  <node id="32131" label="WP_090014707_1" cy:nodeId="218">
    <graphics x="4297.5068359375" z="0.0" y="4862.71484375"/>
  </node>
  <node id="32130" label="SDN00667_1" cy:nodeId="219">
    <graphics x="4299.82861328125" z="0.0" y="4754.9755859375"/>
  </node>
  <node id="32129" label="WP_101557149_2" cy:nodeId="220">
    <graphics x="4399.82861328125" z="0.0" y="4862.71484375"/>
  </node>
  <node id="32128" label="WP_101557151_2" cy:nodeId="221">
    <graphics x="4402.14990234375" z="0.0" y="4754.9755859375"/>
  </node>
  <node id="32127" label="WP_082163142_2" cy:nodeId="222">
    <graphics x="4502.14990234375" z="0.0" y="4862.71484375"/>
  </node>
  <node id="32126" label="EFF80328_2" cy:nodeId="223">
    <graphics x="4504.4716796875" z="0.0" y="4754.9755859375"/>
  </node>
  <node id="32125" label="AKJ11412_3" cy:nodeId="224">
    <graphics x="4604.4716796875" z="0.0" y="4862.71484375"/>
  </node>
  <node id="32124" label="AKJ11407_3" cy:nodeId="225">
    <graphics x="4606.79296875" z="0.0" y="4754.9755859375"/>
  </node>
  <node id="32123" label="WP_124799873_2" cy:nodeId="226">
    <graphics x="4706.79296875" z="0.0" y="4862.71484375"/>
  </node>
  <node id="32122" label="WP_094931980_1" cy:nodeId="227">
    <graphics x="4709.11474609375" z="0.0" y="4754.9755859375"/>
  </node>
  <node id="32121" label="WP_121191582_2" cy:nodeId="228">
    <graphics x="4809.11474609375" z="0.0" y="4862.71484375"/>
  </node>
  <node id="32120" label="RKS80725_2" cy:nodeId="229">
    <graphics x="4811.4365234375" z="0.0" y="4754.9755859375"/>
  </node>
  <node id="32119" label="WP_100806338_1" cy:nodeId="230">
    <graphics x="4911.4365234375" z="0.0" y="4862.71484375"/>
  </node>
  <node id="32118" label="WP_049566251_1" cy:nodeId="231">
    <graphics x="4913.7578125" z="0.0" y="4754.9755859375"/>
  </node>
  <node id="32117" label="SDE51953_3" cy:nodeId="232">
    <graphics x="5013.7578125" z="0.0" y="4862.71484375"/>
  </node>
  <node id="32116" label="WP_091040567_4" cy:nodeId="233">
    <graphics x="5016.07958984375" z="0.0" y="4754.9755859375"/>
  </node>
  <node id="32115" label="WP_117355837_2" cy:nodeId="234">
    <graphics x="0.0" z="0.0" y="5070.4541015625"/>
  </node>
  <node id="32114" label="WP_122198059_2" cy:nodeId="235">
    <graphics x="2.3215904235839844" z="0.0" y="4962.71484375"/>
  </node>
  <node id="32113" label="WP_100521517_2" cy:nodeId="236">
    <graphics x="102.32159423828125" z="0.0" y="5070.4541015625"/>
  </node>
  <node id="32112" label="WP_079611677_2" cy:nodeId="237">
    <graphics x="104.64318084716797" z="0.0" y="4962.71484375"/>
  </node>
  <node id="32111" label="SFO39709_1" cy:nodeId="238">
    <graphics x="204.6431884765625" z="0.0" y="5070.4541015625"/>
  </node>
  <node id="32110" label="WP_083597719_1" cy:nodeId="239">
    <graphics x="206.9647674560547" z="0.0" y="4962.71484375"/>
  </node>
  <node id="32109" label="GCB48186_1" cy:nodeId="240">
    <graphics x="306.96478271484375" z="0.0" y="5070.4541015625"/>
  </node>
  <node id="32108" label="WP_124441159_1" cy:nodeId="241">
    <graphics x="309.286376953125" z="0.0" y="4962.71484375"/>
  </node>
  <node id="32107" label="EWM17971_1" cy:nodeId="242">
    <graphics x="409.286376953125" z="0.0" y="5070.4541015625"/>
  </node>
  <node id="32106" label="WP_084580442_2" cy:nodeId="243">
    <graphics x="411.6079406738281" z="0.0" y="4962.71484375"/>
  </node>
  <node id="32105" label="EJJ05688_2" cy:nodeId="244">
    <graphics x="511.60797119140625" z="0.0" y="5070.4541015625"/>
  </node>
  <node id="32104" label="WP_040899039_2" cy:nodeId="245">
    <graphics x="513.9295654296875" z="0.0" y="4962.71484375"/>
  </node>
  <node id="32103" label="WP_126382827_1" cy:nodeId="246">
    <graphics x="613.9295654296875" z="0.0" y="5070.4541015625"/>
  </node>
  <node id="32102" label="WP_126382826_1" cy:nodeId="247">
    <graphics x="616.2511596679688" z="0.0" y="4962.71484375"/>
  </node>
  <node id="32101" label="EWM18075_2" cy:nodeId="248">
    <graphics x="716.2511596679688" z="0.0" y="5070.4541015625"/>
  </node>
  <node id="32100" label="WP_052396081_2" cy:nodeId="249">
    <graphics x="718.57275390625" z="0.0" y="4962.71484375"/>
  </node>
  <node id="32099" label="WP_082275447_3" cy:nodeId="250">
    <graphics x="818.57275390625" z="0.0" y="5070.4541015625"/>
  </node>
  <node id="32098" label="ORC04864_2" cy:nodeId="251">
    <graphics x="820.894287109375" z="0.0" y="4962.71484375"/>
  </node>
  <node id="32097" label="WP_122819575_2" cy:nodeId="252">
    <graphics x="920.894287109375" z="0.0" y="5070.4541015625"/>
  </node>
  <node id="32096" label="WP_071129084_3" cy:nodeId="253">
    <graphics x="923.2158813476562" z="0.0" y="4962.71484375"/>
  </node>
  <node id="32095" label="WP_052396081_1" cy:nodeId="254">
    <graphics x="1023.2159423828125" z="0.0" y="5070.4541015625"/>
  </node>
  <node id="32094" label="EWM18075_1" cy:nodeId="255">
    <graphics x="1025.5374755859375" z="0.0" y="4962.71484375"/>
  </node>
  <node id="32093" label="WP_097276114_1" cy:nodeId="256">
    <graphics x="1125.5374755859375" z="0.0" y="5070.4541015625"/>
  </node>
  <node id="32092" label="WP_059190156_1" cy:nodeId="257">
    <graphics x="1127.859130859375" z="0.0" y="4962.71484375"/>
  </node>
  <node id="32091" label="ONF71727_1" cy:nodeId="258">
    <graphics x="1227.859130859375" z="0.0" y="5070.4541015625"/>
  </node>
  <node id="32090" label="WP_083715654_1" cy:nodeId="259">
    <graphics x="1230.1806640625" z="0.0" y="4962.71484375"/>
  </node>
  <node id="32089" label="WP_030172139_1" cy:nodeId="260">
    <graphics x="1330.1806640625" z="0.0" y="5070.4541015625"/>
  </node>
  <node id="32088" label="WP_030172142_1" cy:nodeId="261">
    <graphics x="1332.5023193359375" z="0.0" y="4962.71484375"/>
  </node>
  <node id="32087" label="WP_121394015_2" cy:nodeId="262">
    <graphics x="1432.5023193359375" z="0.0" y="5070.4541015625"/>
  </node>
  <node id="32086" label="WP_092779820_2" cy:nodeId="263">
    <graphics x="1434.8238525390625" z="0.0" y="4962.71484375"/>
  </node>
  <node id="32085" label="WP_067908345_1" cy:nodeId="264">
    <graphics x="1534.8238525390625" z="0.0" y="5070.4541015625"/>
  </node>
  <node id="32084" label="WP_092533827_1" cy:nodeId="265">
    <graphics x="1537.1455078125" z="0.0" y="4962.71484375"/>
  </node>
  <node id="32083" label="WP_079054543_2" cy:nodeId="266">
    <graphics x="1637.1455078125" z="0.0" y="5070.4541015625"/>
  </node>
  <node id="32082" label="WP_086861034_2" cy:nodeId="267">
    <graphics x="1639.467041015625" z="0.0" y="4962.71484375"/>
  </node>
  <node id="32081" label="SDY68794_2" cy:nodeId="268">
    <graphics x="1739.467041015625" z="0.0" y="5070.4541015625"/>
  </node>
  <node id="32080" label="WP_091159224_2" cy:nodeId="269">
    <graphics x="1741.78857421875" z="0.0" y="4962.71484375"/>
  </node>
  <node id="32079" label="WP_126898321_1" cy:nodeId="270">
    <graphics x="1841.78857421875" z="0.0" y="5070.4541015625"/>
  </node>
  <node id="32078" label="SEC38602_1" cy:nodeId="271">
    <graphics x="1844.1102294921875" z="0.0" y="4962.71484375"/>
  </node>
  <node id="32077" label="WP_083019015_3" cy:nodeId="272">
    <graphics x="1944.1102294921875" z="0.0" y="5070.4541015625"/>
  </node>
  <node id="32076" label="SIK72068_5" cy:nodeId="273">
    <graphics x="1946.4317626953125" z="0.0" y="4962.71484375"/>
  </node>
  <node id="32075" label="WP_123601960_3" cy:nodeId="274">
    <graphics x="2046.431884765625" z="0.0" y="5070.4541015625"/>
  </node>
  <node id="32074" label="WP_123601959_3" cy:nodeId="275">
    <graphics x="2048.75341796875" z="0.0" y="4962.71484375"/>
  </node>
  <node id="32073" label="SFN21853_3" cy:nodeId="276">
    <graphics x="2148.75341796875" z="0.0" y="5070.4541015625"/>
  </node>
  <node id="32072" label="WP_083597223_2" cy:nodeId="277">
    <graphics x="2151.074951171875" z="0.0" y="4962.71484375"/>
  </node>
  <node id="32071" label="SCD31130_3" cy:nodeId="278">
    <graphics x="2251.074951171875" z="0.0" y="5070.4541015625"/>
  </node>
  <node id="32070" label="WP_093544729_3" cy:nodeId="279">
    <graphics x="2253.396484375" z="0.0" y="4962.71484375"/>
  </node>
  <node id="32069" label="PDQ36095_5" cy:nodeId="280">
    <graphics x="2353.396484375" z="0.0" y="5070.4541015625"/>
  </node>
  <node id="32068" label="PDQ36093_6" cy:nodeId="281">
    <graphics x="2355.71826171875" z="0.0" y="4962.71484375"/>
  </node>
  <node id="32067" label="WP_084692314_5" cy:nodeId="282">
    <graphics x="2455.71826171875" z="0.0" y="5070.4541015625"/>
  </node>
  <node id="32066" label="WP_084692311_7" cy:nodeId="283">
    <graphics x="2458.039794921875" z="0.0" y="4962.71484375"/>
  </node>
  <node id="32065" label="OKI46856_2" cy:nodeId="284">
    <graphics x="2558.039794921875" z="0.0" y="5070.4541015625"/>
  </node>
  <node id="32064" label="WP_079182634_2" cy:nodeId="285">
    <graphics x="2560.361328125" z="0.0" y="4962.71484375"/>
  </node>
  <node id="32063" label="WP_120571833_2" cy:nodeId="286">
    <graphics x="2660.361328125" z="0.0" y="5070.4541015625"/>
  </node>
  <node id="32062" label="WP_120571834_2" cy:nodeId="287">
    <graphics x="2662.682861328125" z="0.0" y="4962.71484375"/>
  </node>
  <node id="32061" label="WP_030288747_1" cy:nodeId="288">
    <graphics x="2762.682861328125" z="0.0" y="5070.4541015625"/>
  </node>
  <node id="32060" label="OJH69022_1" cy:nodeId="289">
    <graphics x="2765.004638671875" z="0.0" y="4962.71484375"/>
  </node>
  <node id="32059" label="WP_053729790_1" cy:nodeId="290">
    <graphics x="2865.004638671875" z="0.0" y="5070.4541015625"/>
  </node>
  <node id="32058" label="WP_053729792_1" cy:nodeId="291">
    <graphics x="2867.326171875" z="0.0" y="4962.71484375"/>
  </node>
  <node id="32057" label="WP_037658204_2" cy:nodeId="292">
    <graphics x="2967.326171875" z="0.0" y="5070.4541015625"/>
  </node>
  <node id="32056" label="WP_058846818_2" cy:nodeId="293">
    <graphics x="2969.647705078125" z="0.0" y="4962.71484375"/>
  </node>
  <node id="32055" label="KOG82578_7" cy:nodeId="294">
    <graphics x="3069.647705078125" z="0.0" y="5070.4541015625"/>
  </node>
  <node id="32054" label="WP_083191919_6" cy:nodeId="295">
    <graphics x="3071.96923828125" z="0.0" y="4962.71484375"/>
  </node>
  <node id="32053" label="WP_090014707_3" cy:nodeId="296">
    <graphics x="3171.96923828125" z="0.0" y="5070.4541015625"/>
  </node>
  <node id="32052" label="SDN00667_3" cy:nodeId="297">
    <graphics x="3174.291015625" z="0.0" y="4962.71484375"/>
  </node>
  <node id="32051" label="WP_084692314_3" cy:nodeId="298">
    <graphics x="3274.291015625" z="0.0" y="5070.4541015625"/>
  </node>
  <node id="32050" label="WP_084692311_5" cy:nodeId="299">
    <graphics x="3276.612548828125" z="0.0" y="4962.71484375"/>
  </node>
  <node id="32049" label="PDQ36095_1" cy:nodeId="300">
    <graphics x="3376.612548828125" z="0.0" y="5070.4541015625"/>
  </node>
  <node id="32048" label="PDQ36093_2" cy:nodeId="301">
    <graphics x="3378.93408203125" z="0.0" y="4962.71484375"/>
  </node>
  <node id="32047" label="WP_082128669_1" cy:nodeId="302">
    <graphics x="3478.93408203125" z="0.0" y="5070.4541015625"/>
  </node>
  <node id="32046" label="KLO64220_3" cy:nodeId="303">
    <graphics x="3481.255615234375" z="0.0" y="4962.71484375"/>
  </node>
  <node id="32045" label="WP_080754833_2" cy:nodeId="304">
    <graphics x="3581.255615234375" z="0.0" y="5070.4541015625"/>
  </node>
  <node id="32044" label="WP_052129072_2" cy:nodeId="305">
    <graphics x="3583.5771484375" z="0.0" y="4962.71484375"/>
  </node>
  <node id="32043" label="WP_067823333_3" cy:nodeId="306">
    <graphics x="3683.5771484375" z="0.0" y="5070.4541015625"/>
  </node>
  <node id="32042" label="WP_084523472_2" cy:nodeId="307">
    <graphics x="3685.89892578125" z="0.0" y="4962.71484375"/>
  </node>
  <node id="32041" label="KPI20077_1" cy:nodeId="308">
    <graphics x="3785.89892578125" z="0.0" y="5070.4541015625"/>
  </node>
  <node id="32040" label="WP_054213495_1" cy:nodeId="309">
    <graphics x="3788.220458984375" z="0.0" y="4962.71484375"/>
  </node>
  <node id="32039" label="WP_111209344_3" cy:nodeId="310">
    <graphics x="3888.220458984375" z="0.0" y="5070.4541015625"/>
  </node>
  <node id="32038" label="WP_110911190_4" cy:nodeId="311">
    <graphics x="3890.5419921875" z="0.0" y="4962.71484375"/>
  </node>
  <node id="32037" label="WP_101368245_1" cy:nodeId="312">
    <graphics x="3990.5419921875" z="0.0" y="5070.4541015625"/>
  </node>
  <node id="32036" label="PKV30436_1" cy:nodeId="313">
    <graphics x="3992.863525390625" z="0.0" y="4962.71484375"/>
  </node>
  <node id="32035" label="OJV25031_2" cy:nodeId="314">
    <graphics x="4092.86376953125" z="0.0" y="5070.4541015625"/>
  </node>
  <node id="32034" label="OJV25031_3" cy:nodeId="315">
    <graphics x="4095.18505859375" z="0.0" y="4962.71484375"/>
  </node>
  <node id="32033" label="WP_067972339_3" cy:nodeId="316">
    <graphics x="4195.18505859375" z="0.0" y="5070.4541015625"/>
  </node>
  <node id="32032" label="WP_111166051_3" cy:nodeId="317">
    <graphics x="4197.5068359375" z="0.0" y="4962.71484375"/>
  </node>
  <node id="32031" label="WP_092862843_1" cy:nodeId="318">
    <graphics x="4297.5068359375" z="0.0" y="5070.4541015625"/>
  </node>
  <node id="32030" label="SDQ22037_1" cy:nodeId="319">
    <graphics x="4299.82861328125" z="0.0" y="4962.71484375"/>
  </node>
  <node id="32029" label="SDN00667_4" cy:nodeId="320">
    <graphics x="4399.82861328125" z="0.0" y="5070.4541015625"/>
  </node>
  <node id="32028" label="WP_090014707_4" cy:nodeId="321">
    <graphics x="4402.14990234375" z="0.0" y="4962.71484375"/>
  </node>
  <node id="32027" label="WP_116200011_3" cy:nodeId="322">
    <graphics x="4502.14990234375" z="0.0" y="5070.4541015625"/>
  </node>
  <node id="32026" label="OLB80605_4" cy:nodeId="323">
    <graphics x="4504.4716796875" z="0.0" y="4962.71484375"/>
  </node>
  <node id="32025" label="WP_123601960_1" cy:nodeId="324">
    <graphics x="4604.4716796875" z="0.0" y="5070.4541015625"/>
  </node>
  <node id="32024" label="WP_123601959_1" cy:nodeId="325">
    <graphics x="4606.79296875" z="0.0" y="4962.71484375"/>
  </node>
  <node id="32023" label="EMF02011_3" cy:nodeId="326">
    <graphics x="4706.79296875" z="0.0" y="5070.4541015625"/>
  </node>
  <node id="32022" label="WP_040887728_3" cy:nodeId="327">
    <graphics x="4709.11474609375" z="0.0" y="4962.71484375"/>
  </node>
  <node id="32021" label="WP_123074529_2" cy:nodeId="328">
    <graphics x="4809.11474609375" z="0.0" y="5070.4541015625"/>
  </node>
  <node id="32020" label="WP_130451801_2" cy:nodeId="329">
    <graphics x="4811.4365234375" z="0.0" y="4962.71484375"/>
  </node>
  <node id="32019" label="WP_062760655_3" cy:nodeId="330">
    <graphics x="4911.4365234375" z="0.0" y="5070.4541015625"/>
  </node>
  <node id="32018" label="WP_052499830_2" cy:nodeId="331">
    <graphics x="4913.7578125" z="0.0" y="4962.71484375"/>
  </node>
  <node id="32017" label="WP_030578068_2" cy:nodeId="332">
    <graphics x="5013.7578125" z="0.0" y="5070.4541015625"/>
  </node>
  <node id="32016" label="WP_119286192_3" cy:nodeId="333">
    <graphics x="5016.07958984375" z="0.0" y="4962.71484375"/>
  </node>
  <node id="32015" label="EFL12569_2" cy:nodeId="334">
    <graphics x="0.0" z="0.0" y="5278.193359375"/>
  </node>
  <node id="32014" label="WP_078561279_3" cy:nodeId="335">
    <graphics x="2.3215904235839844" z="0.0" y="5170.4541015625"/>
  </node>
  <node id="32013" label="WP_134128179_1" cy:nodeId="336">
    <graphics x="102.32159423828125" z="0.0" y="5278.193359375"/>
  </node>
  <node id="32012" label="PZS01282_1" cy:nodeId="337">
    <graphics x="104.64318084716797" z="0.0" y="5170.4541015625"/>
  </node>
  <node id="32011" label="WP_063758854_1" cy:nodeId="338">
    <graphics x="204.6431884765625" z="0.0" y="5278.193359375"/>
  </node>
  <node id="32010" label="WP_037862255_1" cy:nodeId="339">
    <graphics x="206.9647674560547" z="0.0" y="5170.4541015625"/>
  </node>
  <node id="32009" label="QBI53056_1" cy:nodeId="340">
    <graphics x="306.96478271484375" z="0.0" y="5278.193359375"/>
  </node>
  <node id="32008" label="WP_131102102_1" cy:nodeId="341">
    <graphics x="309.286376953125" z="0.0" y="5170.4541015625"/>
  </node>
  <node id="32007" label="WP_120205519_1" cy:nodeId="342">
    <graphics x="409.286376953125" z="0.0" y="5278.193359375"/>
  </node>
  <node id="32006" label="WP_119835460_1" cy:nodeId="343">
    <graphics x="411.6079406738281" z="0.0" y="5170.4541015625"/>
  </node>
  <node id="32005" label="AND16936_3" cy:nodeId="344">
    <graphics x="511.60797119140625" z="0.0" y="5278.193359375"/>
  </node>
  <node id="32004" label="WP_084415931_3" cy:nodeId="345">
    <graphics x="513.9295654296875" z="0.0" y="5170.4541015625"/>
  </node>
  <node id="32003" label="WP_080654621_1" cy:nodeId="346">
    <graphics x="613.9295654296875" z="0.0" y="5278.193359375"/>
  </node>
  <node id="32002" label="WP_129587643_3" cy:nodeId="347">
    <graphics x="616.2511596679688" z="0.0" y="5170.4541015625"/>
  </node>
  <node id="32001" label="WP_084415984_1" cy:nodeId="348">
    <graphics x="716.2511596679688" z="0.0" y="5278.193359375"/>
  </node>
  <node id="32000" label="SEH00212_2" cy:nodeId="349">
    <graphics x="718.57275390625" z="0.0" y="5170.4541015625"/>
  </node>
  <node id="31999" label="WP_071934999_1" cy:nodeId="350">
    <graphics x="818.57275390625" z="0.0" y="5278.193359375"/>
  </node>
  <node id="31998" label="WP_112443292_2" cy:nodeId="351">
    <graphics x="820.894287109375" z="0.0" y="5170.4541015625"/>
  </node>
  <node id="31997" label="WP_023550873_2" cy:nodeId="352">
    <graphics x="920.894287109375" z="0.0" y="5278.193359375"/>
  </node>
  <node id="31996" label="WP_012086849_1" cy:nodeId="353">
    <graphics x="923.2158813476562" z="0.0" y="5170.4541015625"/>
  </node>
  <node id="31995" label="WP_018962008_7" cy:nodeId="354">
    <graphics x="1023.2159423828125" z="0.0" y="5278.193359375"/>
  </node>
  <node id="31994" label="WP_018962008_4" cy:nodeId="355">
    <graphics x="1025.5374755859375" z="0.0" y="5170.4541015625"/>
  </node>
  <node id="31993" label="WP_028427539_3" cy:nodeId="356">
    <graphics x="1125.5374755859375" z="0.0" y="5278.193359375"/>
  </node>
  <node id="31992" label="WP_078515914_2" cy:nodeId="357">
    <graphics x="1127.859130859375" z="0.0" y="5170.4541015625"/>
  </node>
  <node id="31991" label="WP_064110435_2" cy:nodeId="358">
    <graphics x="1227.859130859375" z="0.0" y="5278.193359375"/>
  </node>
  <node id="31990" label="WP_090039557_2" cy:nodeId="359">
    <graphics x="1230.1806640625" z="0.0" y="5170.4541015625"/>
  </node>
  <node id="31989" label="WP_121030237_1" cy:nodeId="360">
    <graphics x="1330.1806640625" z="0.0" y="5278.193359375"/>
  </node>
  <node id="31988" label="RKT76768_1" cy:nodeId="361">
    <graphics x="1332.5023193359375" z="0.0" y="5170.4541015625"/>
  </node>
  <node id="31987" label="SDQ22037_2" cy:nodeId="362">
    <graphics x="1432.5023193359375" z="0.0" y="5278.193359375"/>
  </node>
  <node id="31986" label="WP_092862843_2" cy:nodeId="363">
    <graphics x="1434.8238525390625" z="0.0" y="5170.4541015625"/>
  </node>
  <node id="31985" label="ONF71729_1" cy:nodeId="364">
    <graphics x="1534.8238525390625" z="0.0" y="5278.193359375"/>
  </node>
  <node id="31984" label="WP_083715657_1" cy:nodeId="365">
    <graphics x="1537.1455078125" z="0.0" y="5170.4541015625"/>
  </node>
  <node id="31983" label="WP_121148667_2" cy:nodeId="366">
    <graphics x="1637.1455078125" z="0.0" y="5278.193359375"/>
  </node>
  <node id="31982" label="RKT36058_3" cy:nodeId="367">
    <graphics x="1639.467041015625" z="0.0" y="5170.4541015625"/>
  </node>
  <node id="31981" label="WP_094002561_1" cy:nodeId="368">
    <graphics x="1739.467041015625" z="0.0" y="5278.193359375"/>
  </node>
  <node id="31980" label="WP_116110588_1" cy:nodeId="369">
    <graphics x="1741.78857421875" z="0.0" y="5170.4541015625"/>
  </node>
  <node id="31979" label="WP_052318929_2" cy:nodeId="370">
    <graphics x="1841.78857421875" z="0.0" y="5278.193359375"/>
  </node>
  <node id="31978" label="KIE24863_3" cy:nodeId="371">
    <graphics x="1844.1102294921875" z="0.0" y="5170.4541015625"/>
  </node>
  <node id="31977" label="WP_093264055_1" cy:nodeId="372">
    <graphics x="1944.1102294921875" z="0.0" y="5278.193359375"/>
  </node>
  <node id="31976" label="SDR04557_1" cy:nodeId="373">
    <graphics x="1946.4317626953125" z="0.0" y="5170.4541015625"/>
  </node>
  <node id="31975" label="WP_083597223_1" cy:nodeId="374">
    <graphics x="2046.431884765625" z="0.0" y="5278.193359375"/>
  </node>
  <node id="31974" label="SFN21853_1" cy:nodeId="375">
    <graphics x="2048.75341796875" z="0.0" y="5170.4541015625"/>
  </node>
  <node id="31973" label="WP_089774243_3" cy:nodeId="376">
    <graphics x="2148.75341796875" z="0.0" y="5278.193359375"/>
  </node>
  <node id="31972" label="SEE89807_2" cy:nodeId="377">
    <graphics x="2151.074951171875" z="0.0" y="5170.4541015625"/>
  </node>
  <node id="31971" label="WP_078841030_1" cy:nodeId="378">
    <graphics x="2251.074951171875" z="0.0" y="5278.193359375"/>
  </node>
  <node id="31970" label="OPF84252_1" cy:nodeId="379">
    <graphics x="2253.396484375" z="0.0" y="5170.4541015625"/>
  </node>
  <node id="31969" label="KOU46944_4" cy:nodeId="380">
    <graphics x="2353.396484375" z="0.0" y="5278.193359375"/>
  </node>
  <node id="31968" label="KOG82578_6" cy:nodeId="381">
    <graphics x="2355.71826171875" z="0.0" y="5170.4541015625"/>
  </node>
  <node id="31967" label="WP_093583210_5" cy:nodeId="382">
    <graphics x="2455.71826171875" z="0.0" y="5278.193359375"/>
  </node>
  <node id="31966" label="WP_091114658_2" cy:nodeId="383">
    <graphics x="2458.039794921875" z="0.0" y="5170.4541015625"/>
  </node>
  <node id="31965" label="PDQ36093_3" cy:nodeId="384">
    <graphics x="2558.039794921875" z="0.0" y="5278.193359375"/>
  </node>
  <node id="31964" label="PDQ36095_2" cy:nodeId="385">
    <graphics x="2560.361328125" z="0.0" y="5170.4541015625"/>
  </node>
  <node id="31963" label="WP_091067169_3" cy:nodeId="386">
    <graphics x="2660.361328125" z="0.0" y="5278.193359375"/>
  </node>
  <node id="31962" label="SDG90099_2" cy:nodeId="387">
    <graphics x="2662.682861328125" z="0.0" y="5170.4541015625"/>
  </node>
  <node id="31961" label="WP_073452776_2" cy:nodeId="388">
    <graphics x="2762.682861328125" z="0.0" y="5278.193359375"/>
  </node>
  <node id="31960" label="WP_017177815_1" cy:nodeId="389">
    <graphics x="2765.004638671875" z="0.0" y="5170.4541015625"/>
  </node>
  <node id="31959" label="KPC95547_3" cy:nodeId="390">
    <graphics x="2865.004638671875" z="0.0" y="5278.193359375"/>
  </node>
  <node id="31958" label="WP_031027146_3" cy:nodeId="391">
    <graphics x="2867.326171875" z="0.0" y="5170.4541015625"/>
  </node>
  <node id="31957" label="WP_084902797_2" cy:nodeId="392">
    <graphics x="2967.326171875" z="0.0" y="5278.193359375"/>
  </node>
  <node id="31956" label="OKJ94941_1" cy:nodeId="393">
    <graphics x="2969.647705078125" z="0.0" y="5170.4541015625"/>
  </node>
  <node id="31955" label="WP_114029352_1" cy:nodeId="394">
    <graphics x="3069.647705078125" z="0.0" y="5278.193359375"/>
  </node>
  <node id="31954" label="WP_083982727_1" cy:nodeId="395">
    <graphics x="3071.96923828125" z="0.0" y="5170.4541015625"/>
  </node>
  <node id="31953" label="RPF24868_3" cy:nodeId="396">
    <graphics x="3171.96923828125" z="0.0" y="5278.193359375"/>
  </node>
  <node id="31952" label="WP_123971014_4" cy:nodeId="397">
    <graphics x="3174.291015625" z="0.0" y="5170.4541015625"/>
  </node>
  <node id="31951" label="WP_119286192_2" cy:nodeId="398">
    <graphics x="3274.291015625" z="0.0" y="5278.193359375"/>
  </node>
  <node id="31950" label="WP_030578068_1" cy:nodeId="399">
    <graphics x="3276.612548828125" z="0.0" y="5170.4541015625"/>
  </node>
  <node id="31949" label="PDQ36095_4" cy:nodeId="400">
    <graphics x="3376.612548828125" z="0.0" y="5278.193359375"/>
  </node>
  <node id="31948" label="PDQ36099_2" cy:nodeId="401">
    <graphics x="3378.93408203125" z="0.0" y="5170.4541015625"/>
  </node>
  <node id="31947" label="WP_082115066_3" cy:nodeId="402">
    <graphics x="3478.93408203125" z="0.0" y="5278.193359375"/>
  </node>
  <node id="31946" label="KJK44488_3" cy:nodeId="403">
    <graphics x="3481.255615234375" z="0.0" y="5170.4541015625"/>
  </node>
  <node id="31945" label="WP_131102102_9001" cy:nodeId="404">
    <graphics x="3581.255615234375" z="0.0" y="5278.193359375"/>
  </node>
  <node id="31944" label="QBI53056_9001" cy:nodeId="405">
    <graphics x="3583.5771484375" z="0.0" y="5170.4541015625"/>
  </node>
  <node id="31943" label="ACZ89043_2" cy:nodeId="406">
    <graphics x="3683.5771484375" z="0.0" y="5278.193359375"/>
  </node>
  <node id="31942" label="WP_081453250_2" cy:nodeId="407">
    <graphics x="3685.89892578125" z="0.0" y="5170.4541015625"/>
  </node>
  <node id="31941" label="WP_098744376_2" cy:nodeId="408">
    <graphics x="3785.89892578125" z="0.0" y="5278.193359375"/>
  </node>
  <node id="31940" label="SBT66104_2" cy:nodeId="409">
    <graphics x="3788.220458984375" z="0.0" y="5170.4541015625"/>
  </node>
  <node id="31939" label="WP_083603298_3" cy:nodeId="410">
    <graphics x="3888.220458984375" z="0.0" y="5278.193359375"/>
  </node>
  <node id="31938" label="OKL53160_3" cy:nodeId="411">
    <graphics x="3890.5419921875" z="0.0" y="5170.4541015625"/>
  </node>
  <node id="31937" label="OUE29606_1" cy:nodeId="412">
    <graphics x="3990.5419921875" z="0.0" y="5278.193359375"/>
  </node>
  <node id="31936" label="OUE29607_1" cy:nodeId="413">
    <graphics x="3992.863525390625" z="0.0" y="5170.4541015625"/>
  </node>
  <node id="31935" label="WP_076002756_3" cy:nodeId="414">
    <graphics x="4092.86376953125" z="0.0" y="5278.193359375"/>
  </node>
  <node id="31934" label="WP_052038751_3" cy:nodeId="415">
    <graphics x="4095.18505859375" z="0.0" y="5170.4541015625"/>
  </node>
  <node id="31933" label="WP_082008308_2" cy:nodeId="416">
    <graphics x="4195.18505859375" z="0.0" y="5278.193359375"/>
  </node>
  <node id="31932" label="KHK96352_2" cy:nodeId="417">
    <graphics x="4197.5068359375" z="0.0" y="5170.4541015625"/>
  </node>
  <node id="31931" label="WP_035861760_2" cy:nodeId="418">
    <graphics x="4297.5068359375" z="0.0" y="5278.193359375"/>
  </node>
  <node id="31930" label="EXG81129_2" cy:nodeId="419">
    <graphics x="4299.82861328125" z="0.0" y="5170.4541015625"/>
  </node>
  <node id="31929" label="KMT47190_5" cy:nodeId="420">
    <graphics x="4399.82861328125" z="0.0" y="5278.193359375"/>
  </node>
  <node id="31928" label="WP_080968710_2" cy:nodeId="421">
    <graphics x="4402.14990234375" z="0.0" y="5170.4541015625"/>
  </node>
  <node id="31927" label="SEQ04975_1" cy:nodeId="422">
    <graphics x="4502.14990234375" z="0.0" y="5278.193359375"/>
  </node>
  <node id="31926" label="WP_091073170_1" cy:nodeId="423">
    <graphics x="4504.4716796875" z="0.0" y="5170.4541015625"/>
  </node>
  <node id="31925" label="WP_133828511_2" cy:nodeId="424">
    <graphics x="4604.4716796875" z="0.0" y="5278.193359375"/>
  </node>
  <node id="31924" label="WP_116708219_2" cy:nodeId="425">
    <graphics x="4606.79296875" z="0.0" y="5170.4541015625"/>
  </node>
  <node id="31923" label="WP_071042994_4" cy:nodeId="426">
    <graphics x="4706.79296875" z="0.0" y="5278.193359375"/>
  </node>
  <node id="31922" label="WP_071042996_5" cy:nodeId="427">
    <graphics x="4709.11474609375" z="0.0" y="5170.4541015625"/>
  </node>
  <node id="31921" label="WP_033309246_2" cy:nodeId="428">
    <graphics x="4809.11474609375" z="0.0" y="5278.193359375"/>
  </node>
  <node id="31920" label="WP_107308000_2" cy:nodeId="429">
    <graphics x="4811.4365234375" z="0.0" y="5170.4541015625"/>
  </node>
  <node id="31919" label="WP_083715657_2" cy:nodeId="430">
    <graphics x="4911.4365234375" z="0.0" y="5278.193359375"/>
  </node>
  <node id="31918" label="ONF71729_2" cy:nodeId="431">
    <graphics x="4913.7578125" z="0.0" y="5170.4541015625"/>
  </node>
  <node id="31917" label="WP_079177123_5" cy:nodeId="432">
    <graphics x="5013.7578125" z="0.0" y="5278.193359375"/>
  </node>
  <node id="31916" label="OIJ88146_5" cy:nodeId="433">
    <graphics x="5016.07958984375" z="0.0" y="5170.4541015625"/>
  </node>
  <node id="31915" label="EWM17971_2" cy:nodeId="434">
    <graphics x="0.0" z="0.0" y="5485.93310546875"/>
  </node>
  <node id="31914" label="WP_084580442_3" cy:nodeId="435">
    <graphics x="2.3215904235839844" z="0.0" y="5378.193359375"/>
  </node>
  <node id="31913" label="WP_082373216_1" cy:nodeId="436">
    <graphics x="102.32159423828125" z="0.0" y="5485.93310546875"/>
  </node>
  <node id="31912" label="WP_090073899_1" cy:nodeId="437">
    <graphics x="104.64318084716797" z="0.0" y="5378.193359375"/>
  </node>
  <node id="31911" label="WP_089507734_2" cy:nodeId="438">
    <graphics x="204.6431884765625" z="0.0" y="5485.93310546875"/>
  </node>
  <node id="31910" label="OXL32905_2" cy:nodeId="439">
    <graphics x="206.9647674560547" z="0.0" y="5378.193359375"/>
  </node>
  <node id="31909" label="AEV84085_1" cy:nodeId="440">
    <graphics x="306.96478271484375" z="0.0" y="5485.93310546875"/>
  </node>
  <node id="31908" label="WP_052311581_1" cy:nodeId="441">
    <graphics x="309.286376953125" z="0.0" y="5378.193359375"/>
  </node>
  <node id="31907" label="WP_117401161_1" cy:nodeId="442">
    <graphics x="409.286376953125" z="0.0" y="5485.93310546875"/>
  </node>
  <node id="31906" label="WP_117401160_1" cy:nodeId="443">
    <graphics x="411.6079406738281" z="0.0" y="5378.193359375"/>
  </node>
  <node id="31905" label="WP_087454409_2" cy:nodeId="444">
    <graphics x="511.60797119140625" z="0.0" y="5485.93310546875"/>
  </node>
  <node id="31904" label="BAM28031_2" cy:nodeId="445">
    <graphics x="513.9295654296875" z="0.0" y="5378.193359375"/>
  </node>
  <node id="31903" label="WP_124441159_2" cy:nodeId="446">
    <graphics x="613.9295654296875" z="0.0" y="5485.93310546875"/>
  </node>
  <node id="31902" label="GCB48186_2" cy:nodeId="447">
    <graphics x="616.2511596679688" z="0.0" y="5378.193359375"/>
  </node>
  <node id="31901" label="WP_123307848_1" cy:nodeId="448">
    <graphics x="716.2511596679688" z="0.0" y="5485.93310546875"/>
  </node>
  <node id="31900" label="ROS76630_1" cy:nodeId="449">
    <graphics x="718.57275390625" z="0.0" y="5378.193359375"/>
  </node>
  <node id="31899" label="WP_075973981_1" cy:nodeId="450">
    <graphics x="818.57275390625" z="0.0" y="5485.93310546875"/>
  </node>
  <node id="31898" label="EWC60518_1" cy:nodeId="451">
    <graphics x="820.894287109375" z="0.0" y="5378.193359375"/>
  </node>
  <node id="31897" label="WP_131785730_2" cy:nodeId="452">
    <graphics x="920.894287109375" z="0.0" y="5485.93310546875"/>
  </node>
  <node id="31896" label="WP_131785729_2" cy:nodeId="453">
    <graphics x="923.2158813476562" z="0.0" y="5378.193359375"/>
  </node>
  <node id="31895" label="ORA12704_1" cy:nodeId="454">
    <graphics x="1023.2159423828125" z="0.0" y="5485.93310546875"/>
  </node>
  <node id="31894" label="WP_083115866_1" cy:nodeId="455">
    <graphics x="1025.5374755859375" z="0.0" y="5378.193359375"/>
  </node>
  <node id="31893" label="WP_093610459_2" cy:nodeId="456">
    <graphics x="1125.5374755859375" z="0.0" y="5485.93310546875"/>
  </node>
  <node id="31892" label="PWK29583_3" cy:nodeId="457">
    <graphics x="1127.859130859375" z="0.0" y="5378.193359375"/>
  </node>
  <node id="31891" label="WP_077692191_1" cy:nodeId="458">
    <graphics x="1227.859130859375" z="0.0" y="5485.93310546875"/>
  </node>
  <node id="31890" label="WP_073704754_2" cy:nodeId="459">
    <graphics x="1230.1806640625" z="0.0" y="5378.193359375"/>
  </node>
  <node id="31889" label="WP_107778338_1" cy:nodeId="460">
    <graphics x="1330.1806640625" z="0.0" y="5485.93310546875"/>
  </node>
  <node id="31888" label="WP_107778339_1" cy:nodeId="461">
    <graphics x="1332.5023193359375" z="0.0" y="5378.193359375"/>
  </node>
  <node id="31887" label="EMF02011_2" cy:nodeId="462">
    <graphics x="1432.5023193359375" z="0.0" y="5485.93310546875"/>
  </node>
  <node id="31886" label="WP_040887728_2" cy:nodeId="463">
    <graphics x="1434.8238525390625" z="0.0" y="5378.193359375"/>
  </node>
  <node id="31885" label="WP_037658204_1" cy:nodeId="464">
    <graphics x="1534.8238525390625" z="0.0" y="5485.93310546875"/>
  </node>
  <node id="31884" label="WP_058846818_1" cy:nodeId="465">
    <graphics x="1537.1455078125" z="0.0" y="5378.193359375"/>
  </node>
  <node id="31883" label="EFF80328_3" cy:nodeId="466">
    <graphics x="1637.1455078125" z="0.0" y="5485.93310546875"/>
  </node>
  <node id="31882" label="WP_082163142_3" cy:nodeId="467">
    <graphics x="1639.467041015625" z="0.0" y="5378.193359375"/>
  </node>
  <node id="31881" label="OUE27580_3" cy:nodeId="468">
    <graphics x="1739.467041015625" z="0.0" y="5485.93310546875"/>
  </node>
  <node id="31880" label="OUE27579_3" cy:nodeId="469">
    <graphics x="1741.78857421875" z="0.0" y="5378.193359375"/>
  </node>
  <node id="31879" label="SEH00207_9005" cy:nodeId="470">
    <graphics x="1841.78857421875" z="0.0" y="5485.93310546875"/>
  </node>
  <node id="31878" label="SEH00212_3" cy:nodeId="471">
    <graphics x="1844.1102294921875" z="0.0" y="5378.193359375"/>
  </node>
  <node id="31877" label="WP_132186409_3" cy:nodeId="472">
    <graphics x="1944.1102294921875" z="0.0" y="5485.93310546875"/>
  </node>
  <node id="31876" label="WP_132186408_3" cy:nodeId="473">
    <graphics x="1946.4317626953125" z="0.0" y="5378.193359375"/>
  </node>
  <node id="31875" label="WP_030288747_5" cy:nodeId="474">
    <graphics x="2046.431884765625" z="0.0" y="5485.93310546875"/>
  </node>
  <node id="31874" label="OJH69022_5" cy:nodeId="475">
    <graphics x="2048.75341796875" z="0.0" y="5378.193359375"/>
  </node>
  <node id="31873" label="WP_093264055_2" cy:nodeId="476">
    <graphics x="2148.75341796875" z="0.0" y="5485.93310546875"/>
  </node>
  <node id="31872" label="SDR04557_2" cy:nodeId="477">
    <graphics x="2151.074951171875" z="0.0" y="5378.193359375"/>
  </node>
  <node id="31871" label="WP_116154877_8" cy:nodeId="478">
    <graphics x="2251.074951171875" z="0.0" y="5485.93310546875"/>
  </node>
  <node id="31870" label="RED74809_8" cy:nodeId="479">
    <graphics x="2253.396484375" z="0.0" y="5378.193359375"/>
  </node>
  <node id="31869" label="WP_081476164_1" cy:nodeId="480">
    <graphics x="2353.396484375" z="0.0" y="5485.93310546875"/>
  </node>
  <node id="31868" label="AEB46035_1" cy:nodeId="481">
    <graphics x="2355.71826171875" z="0.0" y="5378.193359375"/>
  </node>
  <node id="31867" label="WP_020759490_1" cy:nodeId="482">
    <graphics x="2455.71826171875" z="0.0" y="5485.93310546875"/>
  </node>
  <node id="31866" label="WP_076002756_2" cy:nodeId="483">
    <graphics x="2458.039794921875" z="0.0" y="5378.193359375"/>
  </node>
  <node id="31865" label="ERS23150_3" cy:nodeId="484">
    <graphics x="2558.039794921875" z="0.0" y="5485.93310546875"/>
  </node>
  <node id="31864" label="WP_080564860_1" cy:nodeId="485">
    <graphics x="2560.361328125" z="0.0" y="5378.193359375"/>
  </node>
  <node id="31863" label="OLF11310_2" cy:nodeId="486">
    <graphics x="2660.361328125" z="0.0" y="5485.93310546875"/>
  </node>
  <node id="31862" label="OLF11310_1" cy:nodeId="487">
    <graphics x="2662.682861328125" z="0.0" y="5378.193359375"/>
  </node>
  <node id="31861" label="SFO40826_2" cy:nodeId="488">
    <graphics x="2762.682861328125" z="0.0" y="5485.93310546875"/>
  </node>
  <node id="31860" label="WP_093357236_1" cy:nodeId="489">
    <graphics x="2765.004638671875" z="0.0" y="5378.193359375"/>
  </node>
  <node id="31859" label="WP_026407791_2" cy:nodeId="490">
    <graphics x="2865.004638671875" z="0.0" y="5485.93310546875"/>
  </node>
  <node id="31858" label="WP_051268851_4" cy:nodeId="491">
    <graphics x="2867.326171875" z="0.0" y="5378.193359375"/>
  </node>
  <node id="31857" label="AGC62644_2" cy:nodeId="492">
    <graphics x="2967.326171875" z="0.0" y="5485.93310546875"/>
  </node>
  <node id="31856" label="CDM77002_1" cy:nodeId="493">
    <graphics x="2969.647705078125" z="0.0" y="5378.193359375"/>
  </node>
  <node id="31855" label="AJT41785_3" cy:nodeId="494">
    <graphics x="3069.647705078125" z="0.0" y="5485.93310546875"/>
  </node>
  <node id="31854" label="WP_082057091_3" cy:nodeId="495">
    <graphics x="3071.96923828125" z="0.0" y="5378.193359375"/>
  </node>
  <node id="31853" label="WP_038682890_1" cy:nodeId="496">
    <graphics x="3171.96923828125" z="0.0" y="5485.93310546875"/>
  </node>
  <node id="31852" label="WP_086845754_1" cy:nodeId="497">
    <graphics x="3174.291015625" z="0.0" y="5378.193359375"/>
  </node>
  <node id="31851" label="WP_121005579_1" cy:nodeId="498">
    <graphics x="3274.291015625" z="0.0" y="5485.93310546875"/>
  </node>
  <node id="31850" label="RKT54190_1" cy:nodeId="499">
    <graphics x="3276.612548828125" z="0.0" y="5378.193359375"/>
  </node>
  <node id="31849" label="WP_079180155_2" cy:nodeId="500">
    <graphics x="3376.612548828125" z="0.0" y="5485.93310546875"/>
  </node>
  <node id="31848" label="SGI74060_2" cy:nodeId="501">
    <graphics x="3378.93408203125" z="0.0" y="5378.193359375"/>
  </node>
  <node id="31847" label="WP_007495061_3" cy:nodeId="502">
    <graphics x="3478.93408203125" z="0.0" y="5485.93310546875"/>
  </node>
  <node id="31846" label="WP_028441277_3" cy:nodeId="503">
    <graphics x="3481.255615234375" z="0.0" y="5378.193359375"/>
  </node>
  <node id="31845" label="SEQ04975_2" cy:nodeId="504">
    <graphics x="3581.255615234375" z="0.0" y="5485.93310546875"/>
  </node>
  <node id="31844" label="WP_091073170_2" cy:nodeId="505">
    <graphics x="3583.5771484375" z="0.0" y="5378.193359375"/>
  </node>
  <node id="31843" label="WP_082128669_3" cy:nodeId="506">
    <graphics x="3683.5771484375" z="0.0" y="5485.93310546875"/>
  </node>
  <node id="31842" label="KLO64220_5" cy:nodeId="507">
    <graphics x="3685.89892578125" z="0.0" y="5378.193359375"/>
  </node>
  <node id="31841" label="WP_112443341_1" cy:nodeId="508">
    <graphics x="3785.89892578125" z="0.0" y="5485.93310546875"/>
  </node>
  <node id="31840" label="WP_134664144_4" cy:nodeId="509">
    <graphics x="3788.220458984375" z="0.0" y="5378.193359375"/>
  </node>
  <node id="31839" label="WP_107094495_1" cy:nodeId="510">
    <graphics x="3888.220458984375" z="0.0" y="5485.93310546875"/>
  </node>
  <node id="31838" label="KOV37396_1" cy:nodeId="511">
    <graphics x="3890.5419921875" z="0.0" y="5378.193359375"/>
  </node>
  <node id="31837" label="WP_057611617_2" cy:nodeId="512">
    <graphics x="3990.5419921875" z="0.0" y="5485.93310546875"/>
  </node>
  <node id="31836" label="WP_057611617_1" cy:nodeId="513">
    <graphics x="3992.863525390625" z="0.0" y="5378.193359375"/>
  </node>
  <node id="31835" label="WP_035849418_5" cy:nodeId="514">
    <graphics x="4092.86376953125" z="0.0" y="5485.93310546875"/>
  </node>
  <node id="31834" label="WP_035849420_8" cy:nodeId="515">
    <graphics x="4095.18505859375" z="0.0" y="5378.193359375"/>
  </node>
  <node id="31833" label="OIJ88146_2" cy:nodeId="516">
    <graphics x="4195.18505859375" z="0.0" y="5485.93310546875"/>
  </node>
  <node id="31832" label="WP_079177123_2" cy:nodeId="517">
    <graphics x="4197.5068359375" z="0.0" y="5378.193359375"/>
  </node>
  <node id="31831" label="KZE98020_1" cy:nodeId="518">
    <graphics x="4297.5068359375" z="0.0" y="5485.93310546875"/>
  </node>
  <node id="31830" label="WP_045196822_1" cy:nodeId="519">
    <graphics x="4299.82861328125" z="0.0" y="5378.193359375"/>
  </node>
  <node id="31829" label="WP_075410821_1" cy:nodeId="520">
    <graphics x="4399.82861328125" z="0.0" y="5485.93310546875"/>
  </node>
  <node id="31828" label="WP_081384789_2" cy:nodeId="521">
    <graphics x="4402.14990234375" z="0.0" y="5378.193359375"/>
  </node>
  <node id="31827" label="PWF27333_1" cy:nodeId="522">
    <graphics x="4502.14990234375" z="0.0" y="5485.93310546875"/>
  </node>
  <node id="31826" label="WP_133246044_1" cy:nodeId="523">
    <graphics x="4504.4716796875" z="0.0" y="5378.193359375"/>
  </node>
  <node id="31825" label="WP_123292376_3" cy:nodeId="524">
    <graphics x="4604.4716796875" z="0.0" y="5485.93310546875"/>
  </node>
  <node id="31824" label="ROS45991_3" cy:nodeId="525">
    <graphics x="4606.79296875" z="0.0" y="5378.193359375"/>
  </node>
  <node id="31823" label="RED74809_4" cy:nodeId="526">
    <graphics x="4706.79296875" z="0.0" y="5485.93310546875"/>
  </node>
  <node id="31822" label="WP_116154877_4" cy:nodeId="527">
    <graphics x="4709.11474609375" z="0.0" y="5378.193359375"/>
  </node>
  <node id="31821" label="SFR28131_1" cy:nodeId="528">
    <graphics x="4809.11474609375" z="0.0" y="5485.93310546875"/>
  </node>
  <node id="31820" label="WP_093603934_1" cy:nodeId="529">
    <graphics x="4811.4365234375" z="0.0" y="5378.193359375"/>
  </node>
  <node id="31819" label="WP_091051455_2" cy:nodeId="530">
    <graphics x="4911.4365234375" z="0.0" y="5485.93310546875"/>
  </node>
  <node id="31818" label="SDL22458_2" cy:nodeId="531">
    <graphics x="4913.7578125" z="0.0" y="5378.193359375"/>
  </node>
  <node id="31817" label="WP_083191919_4" cy:nodeId="532">
    <graphics x="5013.7578125" z="0.0" y="5485.93310546875"/>
  </node>
  <node id="31816" label="KOG82578_5" cy:nodeId="533">
    <graphics x="5016.07958984375" z="0.0" y="5378.193359375"/>
  </node>
  <node id="31815" label="WP_083296694_2" cy:nodeId="534">
    <graphics x="0.0" z="0.0" y="5693.67236328125"/>
  </node>
  <node id="31814" label="OFK71393_3" cy:nodeId="535">
    <graphics x="2.3215904235839844" z="0.0" y="5585.93310546875"/>
  </node>
  <node id="31813" label="WP_071042994_2" cy:nodeId="536">
    <graphics x="102.32159423828125" z="0.0" y="5693.67236328125"/>
  </node>
  <node id="31812" label="WP_071042996_2" cy:nodeId="537">
    <graphics x="104.64318084716797" z="0.0" y="5585.93310546875"/>
  </node>
  <node id="31811" label="ONI88739_1" cy:nodeId="538">
    <graphics x="204.6431884765625" z="0.0" y="5693.67236328125"/>
  </node>
  <node id="31810" label="WP_083752781_1" cy:nodeId="539">
    <graphics x="206.9647674560547" z="0.0" y="5585.93310546875"/>
  </node>
  <node id="31809" label="WP_077689962_2" cy:nodeId="540">
    <graphics x="306.96478271484375" z="0.0" y="5693.67236328125"/>
  </node>
  <node id="31808" label="OOC53575_2" cy:nodeId="541">
    <graphics x="309.286376953125" z="0.0" y="5585.93310546875"/>
  </node>
  <node id="31807" label="OIJ88146_6" cy:nodeId="542">
    <graphics x="409.286376953125" z="0.0" y="5693.67236328125"/>
  </node>
  <node id="31806" label="WP_079177123_6" cy:nodeId="543">
    <graphics x="411.6079406738281" z="0.0" y="5585.93310546875"/>
  </node>
  <node id="31805" label="WP_009951067_4" cy:nodeId="544">
    <graphics x="511.60797119140625" z="0.0" y="5693.67236328125"/>
  </node>
  <node id="31804" label="CAM04239_5" cy:nodeId="545">
    <graphics x="513.9295654296875" z="0.0" y="5585.93310546875"/>
  </node>
  <node id="31803" label="WP_073785992_2" cy:nodeId="546">
    <graphics x="613.9295654296875" z="0.0" y="5693.67236328125"/>
  </node>
  <node id="31802" label="OKH95170_2" cy:nodeId="547">
    <graphics x="616.2511596679688" z="0.0" y="5585.93310546875"/>
  </node>
  <node id="31801" label="WP_110470681_2" cy:nodeId="548">
    <graphics x="716.2511596679688" z="0.0" y="5693.67236328125"/>
  </node>
  <node id="31800" label="PYE15898_2" cy:nodeId="549">
    <graphics x="718.57275390625" z="0.0" y="5585.93310546875"/>
  </node>
  <node id="31799" label="SEE89807_1" cy:nodeId="550">
    <graphics x="818.57275390625" z="0.0" y="5693.67236328125"/>
  </node>
  <node id="31798" label="WP_089774243_2" cy:nodeId="551">
    <graphics x="820.894287109375" z="0.0" y="5585.93310546875"/>
  </node>
  <node id="31797" label="WP_088290452_2" cy:nodeId="552">
    <graphics x="920.894287109375" z="0.0" y="5693.67236328125"/>
  </node>
  <node id="31796" label="WP_088261769_2" cy:nodeId="553">
    <graphics x="923.2158813476562" z="0.0" y="5585.93310546875"/>
  </node>
  <node id="31795" label="WP_017545560_2" cy:nodeId="554">
    <graphics x="1023.2159423828125" z="0.0" y="5693.67236328125"/>
  </node>
  <node id="31794" label="WP_110050419_5" cy:nodeId="555">
    <graphics x="1025.5374755859375" z="0.0" y="5585.93310546875"/>
  </node>
  <node id="31793" label="WP_107004474_3" cy:nodeId="556">
    <graphics x="1125.5374755859375" z="0.0" y="5693.67236328125"/>
  </node>
  <node id="31792" label="WP_066216109_3" cy:nodeId="557">
    <graphics x="1127.859130859375" z="0.0" y="5585.93310546875"/>
  </node>
  <node id="31791" label="WP_121030237_3" cy:nodeId="558">
    <graphics x="1227.859130859375" z="0.0" y="5693.67236328125"/>
  </node>
  <node id="31790" label="RKT76768_3" cy:nodeId="559">
    <graphics x="1230.1806640625" z="0.0" y="5585.93310546875"/>
  </node>
  <node id="31789" label="WP_073387576_1" cy:nodeId="560">
    <graphics x="1330.1806640625" z="0.0" y="5693.67236328125"/>
  </node>
  <node id="31788" label="WP_095563712_4" cy:nodeId="561">
    <graphics x="1332.5023193359375" z="0.0" y="5585.93310546875"/>
  </node>
  <node id="31787" label="ONI88739_2" cy:nodeId="562">
    <graphics x="1432.5023193359375" z="0.0" y="5693.67236328125"/>
  </node>
  <node id="31786" label="WP_083752781_2" cy:nodeId="563">
    <graphics x="1434.8238525390625" z="0.0" y="5585.93310546875"/>
  </node>
  <node id="31785" label="WP_094009173_1" cy:nodeId="564">
    <graphics x="1534.8238525390625" z="0.0" y="5693.67236328125"/>
  </node>
  <node id="31784" label="WP_053676554_1" cy:nodeId="565">
    <graphics x="1537.1455078125" z="0.0" y="5585.93310546875"/>
  </node>
  <node id="31783" label="WP_084692311_4" cy:nodeId="566">
    <graphics x="1637.1455078125" z="0.0" y="5693.67236328125"/>
  </node>
  <node id="31782" label="WP_084692314_2" cy:nodeId="567">
    <graphics x="1639.467041015625" z="0.0" y="5585.93310546875"/>
  </node>
  <node id="31781" label="ROS45991_1" cy:nodeId="568">
    <graphics x="1739.467041015625" z="0.0" y="5693.67236328125"/>
  </node>
  <node id="31780" label="WP_123292376_1" cy:nodeId="569">
    <graphics x="1741.78857421875" z="0.0" y="5585.93310546875"/>
  </node>
  <node id="31779" label="OJV24806_1" cy:nodeId="570">
    <graphics x="1841.78857421875" z="0.0" y="5693.67236328125"/>
  </node>
  <node id="31778" label="OJV25031_1" cy:nodeId="571">
    <graphics x="1844.1102294921875" z="0.0" y="5585.93310546875"/>
  </node>
  <node id="31777" label="WP_078590495_2" cy:nodeId="572">
    <graphics x="1944.1102294921875" z="0.0" y="5693.67236328125"/>
  </node>
  <node id="31776" label="CCB71037_2" cy:nodeId="573">
    <graphics x="1946.4317626953125" z="0.0" y="5585.93310546875"/>
  </node>
  <node id="31775" label="CAM04239_4" cy:nodeId="574">
    <graphics x="2046.431884765625" z="0.0" y="5693.67236328125"/>
  </node>
  <node id="31774" label="WP_009951067_3" cy:nodeId="575">
    <graphics x="2048.75341796875" z="0.0" y="5585.93310546875"/>
  </node>
  <node id="31773" label="WP_062760655_1" cy:nodeId="576">
    <graphics x="2148.75341796875" z="0.0" y="5693.67236328125"/>
  </node>
  <node id="31772" label="WP_122198059_3" cy:nodeId="577">
    <graphics x="2151.074951171875" z="0.0" y="5585.93310546875"/>
  </node>
  <node id="31771" label="KHK96352_1" cy:nodeId="578">
    <graphics x="2251.074951171875" z="0.0" y="5693.67236328125"/>
  </node>
  <node id="31770" label="WP_082008308_1" cy:nodeId="579">
    <graphics x="2253.396484375" z="0.0" y="5585.93310546875"/>
  </node>
  <node id="31769" label="WP_116026137_2" cy:nodeId="580">
    <graphics x="2353.396484375" z="0.0" y="5693.67236328125"/>
  </node>
  <node id="31768" label="WP_116026136_2" cy:nodeId="581">
    <graphics x="2355.71826171875" z="0.0" y="5585.93310546875"/>
  </node>
  <node id="31767" label="OKL53160_1" cy:nodeId="582">
    <graphics x="2455.71826171875" z="0.0" y="5693.67236328125"/>
  </node>
  <node id="31766" label="WP_083603298_1" cy:nodeId="583">
    <graphics x="2458.039794921875" z="0.0" y="5585.93310546875"/>
  </node>
  <node id="31765" label="WP_053775070_1" cy:nodeId="584">
    <graphics x="2558.039794921875" z="0.0" y="5693.67236328125"/>
  </node>
  <node id="31764" label="WP_029068734_3" cy:nodeId="585">
    <graphics x="2560.361328125" z="0.0" y="5585.93310546875"/>
  </node>
  <node id="31763" label="ERS23150_2" cy:nodeId="586">
    <graphics x="2660.361328125" z="0.0" y="5693.67236328125"/>
  </node>
  <node id="31762" label="EGY78124_2" cy:nodeId="587">
    <graphics x="2662.682861328125" z="0.0" y="5585.93310546875"/>
  </node>
  <node id="31761" label="WP_062097999_5" cy:nodeId="588">
    <graphics x="2762.682861328125" z="0.0" y="5693.67236328125"/>
  </node>
  <node id="31760" label="WP_128397239_5" cy:nodeId="589">
    <graphics x="2765.004638671875" z="0.0" y="5585.93310546875"/>
  </node>
  <node id="31759" label="WP_101557151_3" cy:nodeId="590">
    <graphics x="2865.004638671875" z="0.0" y="5693.67236328125"/>
  </node>
  <node id="31758" label="WP_101557149_3" cy:nodeId="591">
    <graphics x="2867.326171875" z="0.0" y="5585.93310546875"/>
  </node>
  <node id="31757" label="WP_083191919_2" cy:nodeId="592">
    <graphics x="2967.326171875" z="0.0" y="5693.67236328125"/>
  </node>
  <node id="31756" label="KOG82578_2" cy:nodeId="593">
    <graphics x="2969.647705078125" z="0.0" y="5585.93310546875"/>
  </node>
  <node id="31755" label="WP_046468711_1" cy:nodeId="594">
    <graphics x="3069.647705078125" z="0.0" y="5693.67236328125"/>
  </node>
  <node id="31754" label="WP_051458214_3" cy:nodeId="595">
    <graphics x="3071.96923828125" z="0.0" y="5585.93310546875"/>
  </node>
  <node id="31753" label="WP_067972339_1" cy:nodeId="596">
    <graphics x="3171.96923828125" z="0.0" y="5693.67236328125"/>
  </node>
  <node id="31752" label="WP_111166051_1" cy:nodeId="597">
    <graphics x="3174.291015625" z="0.0" y="5585.93310546875"/>
  </node>
  <node id="31751" label="KQR47999_2" cy:nodeId="598">
    <graphics x="3274.291015625" z="0.0" y="5693.67236328125"/>
  </node>
  <node id="31750" label="WP_082508744_2" cy:nodeId="599">
    <graphics x="3276.612548828125" z="0.0" y="5585.93310546875"/>
  </node>
  <node id="31749" label="WP_083115866_2" cy:nodeId="600">
    <graphics x="3376.612548828125" z="0.0" y="5693.67236328125"/>
  </node>
  <node id="31748" label="ORA12704_2" cy:nodeId="601">
    <graphics x="3378.93408203125" z="0.0" y="5585.93310546875"/>
  </node>
  <node id="31747" label="WP_100302197_1" cy:nodeId="602">
    <graphics x="3478.93408203125" z="0.0" y="5693.67236328125"/>
  </node>
  <node id="31746" label="PJJ46026_1" cy:nodeId="603">
    <graphics x="3481.255615234375" z="0.0" y="5585.93310546875"/>
  </node>
  <node id="31745" label="WP_112443292_6" cy:nodeId="604">
    <graphics x="3581.255615234375" z="0.0" y="5693.67236328125"/>
  </node>
  <node id="31744" label="WP_063274437_2" cy:nodeId="605">
    <graphics x="3583.5771484375" z="0.0" y="5585.93310546875"/>
  </node>
  <node id="31743" label="WP_122198059_1" cy:nodeId="606">
    <graphics x="3683.5771484375" z="0.0" y="5693.67236328125"/>
  </node>
  <node id="31742" label="WP_117355837_1" cy:nodeId="607">
    <graphics x="3685.89892578125" z="0.0" y="5585.93310546875"/>
  </node>
  <node id="31741" label="WP_091273394_4" cy:nodeId="608">
    <graphics x="3785.89892578125" z="0.0" y="5693.67236328125"/>
  </node>
  <node id="31740" label="WP_076825825_2" cy:nodeId="609">
    <graphics x="3788.220458984375" z="0.0" y="5585.93310546875"/>
  </node>
  <node id="31739" label="OPF84252_3" cy:nodeId="610">
    <graphics x="3888.220458984375" z="0.0" y="5693.67236328125"/>
  </node>
  <node id="31738" label="WP_078841030_3" cy:nodeId="611">
    <graphics x="3890.5419921875" z="0.0" y="5585.93310546875"/>
  </node>
  <node id="31737" label="AXG59058_3" cy:nodeId="612">
    <graphics x="3990.5419921875" z="0.0" y="5693.67236328125"/>
  </node>
  <node id="31736" label="ANS70161_3" cy:nodeId="613">
    <graphics x="3992.863525390625" z="0.0" y="5585.93310546875"/>
  </node>
  <node id="31735" label="WP_121030237_2" cy:nodeId="614">
    <graphics x="4092.86376953125" z="0.0" y="5693.67236328125"/>
  </node>
  <node id="31734" label="RKT76768_2" cy:nodeId="615">
    <graphics x="4095.18505859375" z="0.0" y="5585.93310546875"/>
  </node>
  <node id="31733" label="ACZ89043_4" cy:nodeId="616">
    <graphics x="4195.18505859375" z="0.0" y="5693.67236328125"/>
  </node>
  <node id="31732" label="WP_081453250_3" cy:nodeId="617">
    <graphics x="4197.5068359375" z="0.0" y="5585.93310546875"/>
  </node>
  <node id="31731" label="WP_132170149_1" cy:nodeId="618">
    <graphics x="4297.5068359375" z="0.0" y="5693.67236328125"/>
  </node>
  <node id="31730" label="WP_132170147_1" cy:nodeId="619">
    <graphics x="4299.82861328125" z="0.0" y="5585.93310546875"/>
  </node>
  <node id="31729" label="OJV24808_3" cy:nodeId="620">
    <graphics x="4399.82861328125" z="0.0" y="5693.67236328125"/>
  </node>
  <node id="31728" label="OJV24806_3" cy:nodeId="621">
    <graphics x="4402.14990234375" z="0.0" y="5585.93310546875"/>
  </node>
  <node id="31727" label="WP_116154877_7" cy:nodeId="622">
    <graphics x="4502.14990234375" z="0.0" y="5693.67236328125"/>
  </node>
  <node id="31726" label="RED74809_7" cy:nodeId="623">
    <graphics x="4504.4716796875" z="0.0" y="5585.93310546875"/>
  </node>
  <node id="31725" label="WP_100302197_2" cy:nodeId="624">
    <graphics x="4604.4716796875" z="0.0" y="5693.67236328125"/>
  </node>
  <node id="31724" label="PJJ46026_2" cy:nodeId="625">
    <graphics x="4606.79296875" z="0.0" y="5585.93310546875"/>
  </node>
  <node id="31723" label="WP_105032337_2" cy:nodeId="626">
    <graphics x="4706.79296875" z="0.0" y="5693.67236328125"/>
  </node>
  <node id="31722" label="WP_104181080_2" cy:nodeId="627">
    <graphics x="4709.11474609375" z="0.0" y="5585.93310546875"/>
  </node>
  <node id="31721" label="WP_125614105_1" cy:nodeId="628">
    <graphics x="4809.11474609375" z="0.0" y="5693.67236328125"/>
  </node>
  <node id="31720" label="PDQ36469_2" cy:nodeId="629">
    <graphics x="4811.4365234375" z="0.0" y="5585.93310546875"/>
  </node>
  <node id="31719" label="WP_061787443_4" cy:nodeId="630">
    <graphics x="4911.4365234375" z="0.0" y="5693.67236328125"/>
  </node>
  <node id="31718" label="WP_130875440_1" cy:nodeId="631">
    <graphics x="4913.7578125" z="0.0" y="5585.93310546875"/>
  </node>
  <node id="31717" label="WP_017568552_3" cy:nodeId="632">
    <graphics x="5013.7578125" z="0.0" y="5693.67236328125"/>
  </node>
  <node id="31716" label="WP_017568553_3" cy:nodeId="633">
    <graphics x="5016.07958984375" z="0.0" y="5585.93310546875"/>
  </node>
  <node id="31715" label="WP_135448567_2" cy:nodeId="634">
    <graphics x="0.0" z="0.0" y="5901.41162109375"/>
  </node>
  <node id="31714" label="WP_096168585_3" cy:nodeId="635">
    <graphics x="2.3215904235839844" z="0.0" y="5793.67236328125"/>
  </node>
  <node id="31713" label="WP_131965735_4" cy:nodeId="636">
    <graphics x="102.32159423828125" z="0.0" y="5901.41162109375"/>
  </node>
  <node id="31712" label="WP_131965734_3" cy:nodeId="637">
    <graphics x="104.64318084716797" z="0.0" y="5793.67236328125"/>
  </node>
  <node id="31711" label="WP_078590495_1" cy:nodeId="638">
    <graphics x="204.6431884765625" z="0.0" y="5901.41162109375"/>
  </node>
  <node id="31710" label="CCB71037_1" cy:nodeId="639">
    <graphics x="206.9647674560547" z="0.0" y="5793.67236328125"/>
  </node>
  <node id="31709" label="WP_084692311_6" cy:nodeId="640">
    <graphics x="306.96478271484375" z="0.0" y="5901.41162109375"/>
  </node>
  <node id="31708" label="WP_084692314_4" cy:nodeId="641">
    <graphics x="309.286376953125" z="0.0" y="5793.67236328125"/>
  </node>
  <node id="31707" label="OKI46856_3" cy:nodeId="642">
    <graphics x="409.286376953125" z="0.0" y="5901.41162109375"/>
  </node>
  <node id="31706" label="WP_079182634_3" cy:nodeId="643">
    <graphics x="411.6079406738281" z="0.0" y="5793.67236328125"/>
  </node>
  <node id="31705" label="WP_048317341_2" cy:nodeId="644">
    <graphics x="511.60797119140625" z="0.0" y="5901.41162109375"/>
  </node>
  <node id="31704" label="WP_048316860_2" cy:nodeId="645">
    <graphics x="513.9295654296875" z="0.0" y="5793.67236328125"/>
  </node>
  <node id="31703" label="EXG81129_1" cy:nodeId="646">
    <graphics x="613.9295654296875" z="0.0" y="5901.41162109375"/>
  </node>
  <node id="31702" label="WP_035861760_1" cy:nodeId="647">
    <graphics x="616.2511596679688" z="0.0" y="5793.67236328125"/>
  </node>
  <node id="31701" label="WP_103960548_1" cy:nodeId="648">
    <graphics x="716.2511596679688" z="0.0" y="5901.41162109375"/>
  </node>
  <node id="31700" label="SEG99236_1" cy:nodeId="649">
    <graphics x="718.57275390625" z="0.0" y="5793.67236328125"/>
  </node>
  <node id="31699" label="WP_133828511_1" cy:nodeId="650">
    <graphics x="818.57275390625" z="0.0" y="5901.41162109375"/>
  </node>
  <node id="31698" label="WP_116708219_1" cy:nodeId="651">
    <graphics x="820.894287109375" z="0.0" y="5793.67236328125"/>
  </node>
  <node id="31697" label="EGQ75425_4" cy:nodeId="652">
    <graphics x="920.894287109375" z="0.0" y="5901.41162109375"/>
  </node>
  <node id="31696" label="WP_034253534_4" cy:nodeId="653">
    <graphics x="923.2158813476562" z="0.0" y="5793.67236328125"/>
  </node>
  <node id="31695" label="WP_040887728_4" cy:nodeId="654">
    <graphics x="1023.2159423828125" z="0.0" y="5901.41162109375"/>
  </node>
  <node id="31694" label="EMF02011_4" cy:nodeId="655">
    <graphics x="1025.5374755859375" z="0.0" y="5793.67236328125"/>
  </node>
  <node id="31693" label="WP_082115066_4" cy:nodeId="656">
    <graphics x="1125.5374755859375" z="0.0" y="5901.41162109375"/>
  </node>
  <node id="31692" label="KJK44488_5" cy:nodeId="657">
    <graphics x="1127.859130859375" z="0.0" y="5793.67236328125"/>
  </node>
  <node id="31691" label="WP_079180155_1" cy:nodeId="658">
    <graphics x="1227.859130859375" z="0.0" y="5901.41162109375"/>
  </node>
  <node id="31690" label="SGI74060_1" cy:nodeId="659">
    <graphics x="1230.1806640625" z="0.0" y="5793.67236328125"/>
  </node>
  <node id="31689" label="WP_085213387_1" cy:nodeId="660">
    <graphics x="1330.1806640625" z="0.0" y="5901.41162109375"/>
  </node>
  <node id="31688" label="SMF78969_1" cy:nodeId="661">
    <graphics x="1332.5023193359375" z="0.0" y="5793.67236328125"/>
  </node>
  <node id="31687" label="RLV71217_2" cy:nodeId="662">
    <graphics x="1432.5023193359375" z="0.0" y="5901.41162109375"/>
  </node>
  <node id="31686" label="WP_073876556_3" cy:nodeId="663">
    <graphics x="1434.8238525390625" z="0.0" y="5793.67236328125"/>
  </node>
  <node id="31685" label="OBA55656_3" cy:nodeId="664">
    <graphics x="1534.8238525390625" z="0.0" y="5901.41162109375"/>
  </node>
  <node id="31684" label="WP_064833209_2" cy:nodeId="665">
    <graphics x="1537.1455078125" z="0.0" y="5793.67236328125"/>
  </node>
  <node id="31683" label="SCD31130_1" cy:nodeId="666">
    <graphics x="1637.1455078125" z="0.0" y="5901.41162109375"/>
  </node>
  <node id="31682" label="WP_093544729_1" cy:nodeId="667">
    <graphics x="1639.467041015625" z="0.0" y="5793.67236328125"/>
  </node>
  <node id="31681" label="WP_055578070_5" cy:nodeId="668">
    <graphics x="1739.467041015625" z="0.0" y="5901.41162109375"/>
  </node>
  <node id="31680" label="RUP01435_5" cy:nodeId="669">
    <graphics x="1741.78857421875" z="0.0" y="5793.67236328125"/>
  </node>
  <node id="31679" label="ROS45991_2" cy:nodeId="670">
    <graphics x="1841.78857421875" z="0.0" y="5901.41162109375"/>
  </node>
  <node id="31678" label="WP_017559667_3" cy:nodeId="671">
    <graphics x="1844.1102294921875" z="0.0" y="5793.67236328125"/>
  </node>
  <node id="31677" label="WP_131965735_3" cy:nodeId="672">
    <graphics x="1944.1102294921875" z="0.0" y="5901.41162109375"/>
  </node>
  <node id="31676" label="WP_131965734_2" cy:nodeId="673">
    <graphics x="1946.4317626953125" z="0.0" y="5793.67236328125"/>
  </node>
  <node id="31675" label="WP_051777853_1" cy:nodeId="674">
    <graphics x="2046.431884765625" z="0.0" y="5901.41162109375"/>
  </node>
  <node id="31674" label="WP_100861846_2" cy:nodeId="675">
    <graphics x="2048.75341796875" z="0.0" y="5793.67236328125"/>
  </node>
  <node id="31673" label="WP_082248115_3" cy:nodeId="676">
    <graphics x="3002.2509765625" z="0.0" y="3507.2734375"/>
  </node>
  <node id="31672" label="OQM68597_3" cy:nodeId="677">
    <graphics x="3019.589599609375" z="0.0" y="3613.649658203125"/>
  </node>
  <node id="31671" label="WP_080684945_1" cy:nodeId="678">
    <graphics x="3103.060546875" z="0.0" y="3545.42578125"/>
  </node>
  <node id="31670" label="WP_080909324_1" cy:nodeId="679">
    <graphics x="3203.060546875" z="0.0" y="3507.2734375"/>
  </node>
  <node id="31669" label="WP_124566915_1" cy:nodeId="680">
    <graphics x="3307.505859375" z="0.0" y="3533.88134765625"/>
  </node>
  <node id="31668" label="WP_075831737_1" cy:nodeId="681">
    <graphics x="3232.21826171875" z="0.0" y="3611.04150390625"/>
  </node>
  <node id="31667" label="WP_091216389_3" cy:nodeId="682">
    <graphics x="3407.505859375" z="0.0" y="3507.2734375"/>
  </node>
  <node id="31666" label="SDL97273_3" cy:nodeId="683">
    <graphics x="3513.457275390625" z="0.0" y="3527.03076171875"/>
  </node>
  <node id="31665" label="WP_030701973_2" cy:nodeId="684">
    <graphics x="3443.35302734375" z="0.0" y="3608.926513671875"/>
  </node>
  <node id="31664" label="KPI20077_3" cy:nodeId="685">
    <graphics x="3613.457275390625" z="0.0" y="3507.2734375"/>
  </node>
  <node id="31663" label="WP_054213495_3" cy:nodeId="686">
    <graphics x="3719.408447265625" z="0.0" y="3527.03076171875"/>
  </node>
  <node id="31662" label="WP_119105432_2" cy:nodeId="687">
    <graphics x="3649.30419921875" z="0.0" y="3608.926513671875"/>
  </node>
  <node id="31661" label="WP_051338384_1" cy:nodeId="688">
    <graphics x="3819.408447265625" z="0.0" y="3507.2734375"/>
  </node>
  <node id="31660" label="WP_125314889_1" cy:nodeId="689">
    <graphics x="3964.474609375" z="0.0" y="3667.7216796875"/>
  </node>
  <node id="31659" label="WP_106674009_1" cy:nodeId="690">
    <graphics x="3889.38818359375" z="0.0" y="3590.306640625"/>
  </node>
  <node id="31658" label="REF98980_2" cy:nodeId="691">
    <graphics x="4064.474609375" z="0.0" y="3507.2734375"/>
  </node>
  <node id="31657" label="SCG59471_1" cy:nodeId="692">
    <graphics x="4170.42578125" z="0.0" y="3527.03076171875"/>
  </node>
  <node id="31656" label="WP_053652832_3" cy:nodeId="693">
    <graphics x="4100.32177734375" z="0.0" y="3608.926513671875"/>
  </node>
  <node id="31655" label="WP_069774196_3" cy:nodeId="694">
    <graphics x="4270.42578125" z="0.0" y="3507.2734375"/>
  </node>
  <node id="31654" label="SDE51953_4" cy:nodeId="695">
    <graphics x="4376.376953125" z="0.0" y="3527.03076171875"/>
  </node>
  <node id="31653" label="WP_091040567_5" cy:nodeId="696">
    <graphics x="4306.27294921875" z="0.0" y="3608.926513671875"/>
  </node>
  <node id="31652" label="WP_116154877_6" cy:nodeId="697">
    <graphics x="4476.376953125" z="0.0" y="3507.2734375"/>
  </node>
  <node id="31651" label="RED74809_6" cy:nodeId="698">
    <graphics x="4580.51025390625" z="0.0" y="3535.080322265625"/>
  </node>
  <node id="31650" label="PKV33869_6" cy:nodeId="699">
    <graphics x="4504.33984375" z="0.0" y="3611.369384765625"/>
  </node>
  <node id="31649" label="WP_043591397_2" cy:nodeId="700">
    <graphics x="4680.51025390625" z="0.0" y="3507.2734375"/>
  </node>
  <node id="31648" label="WP_108913844_2" cy:nodeId="701">
    <graphics x="4784.6435546875" z="0.0" y="3535.080322265625"/>
  </node>
  <node id="31647" label="WP_076804070_2" cy:nodeId="702">
    <graphics x="4708.47265625" z="0.0" y="3611.369384765625"/>
  </node>
  <node id="31646" label="WP_107120384_3" cy:nodeId="703">
    <graphics x="4884.6435546875" z="0.0" y="3507.2734375"/>
  </node>
  <node id="31645" label="KUN25245_3" cy:nodeId="704">
    <graphics x="4988.77685546875" z="0.0" y="3535.080322265625"/>
  </node>
  <node id="31644" label="WP_059193363_3" cy:nodeId="705">
    <graphics x="4912.60595703125" z="0.0" y="3611.369384765625"/>
  </node>
  <node id="31643" label="WP_081900771_1" cy:nodeId="706">
    <graphics x="5088.77685546875" z="0.0" y="3507.2734375"/>
  </node>
  <node id="31642" label="SDM16976_1" cy:nodeId="707">
    <graphics x="5192.90966796875" z="0.0" y="3535.080322265625"/>
  </node>
  <node id="31641" label="WP_086828879_1" cy:nodeId="708">
    <graphics x="5116.7392578125" z="0.0" y="3611.369384765625"/>
  </node>
  <node id="31640" label="WP_083715654_5" cy:nodeId="709">
    <graphics x="0.0" z="0.0" y="3901.874755859375"/>
  </node>
  <node id="31639" label="ONF71727_5" cy:nodeId="710">
    <graphics x="104.4453125" z="0.0" y="3928.482666015625"/>
  </node>
  <node id="31638" label="WP_072028150_2" cy:nodeId="711">
    <graphics x="29.157550811767578" z="0.0" y="4005.64306640625"/>
  </node>
  <node id="31637" label="WP_076843253_2" cy:nodeId="712">
    <graphics x="204.4453125" z="0.0" y="3901.874755859375"/>
  </node>
  <node id="31636" label="WP_076843254_2" cy:nodeId="713">
    <graphics x="310.3965148925781" z="0.0" y="3921.632080078125"/>
  </node>
  <node id="31635" label="KLL12571_3" cy:nodeId="714">
    <graphics x="240.29232788085938" z="0.0" y="4003.528076171875"/>
  </node>
  <node id="31634" label="WP_127571148_1" cy:nodeId="715">
    <graphics x="410.3965148925781" z="0.0" y="3901.874755859375"/>
  </node>
  <node id="31633" label="EFF80328_1" cy:nodeId="716">
    <graphics x="514.52978515625" z="0.0" y="3929.681884765625"/>
  </node>
  <node id="31632" label="WP_082163142_1" cy:nodeId="717">
    <graphics x="438.3592224121094" z="0.0" y="4005.970947265625"/>
  </node>
  <node id="31631" label="EWM64891_1" cy:nodeId="718">
    <graphics x="614.52978515625" z="0.0" y="3901.874755859375"/>
  </node>
  <node id="31630" label="WP_082931047_1" cy:nodeId="719">
    <graphics x="718.6630249023438" z="0.0" y="3929.681884765625"/>
  </node>
  <node id="31629" label="WP_083296959_1" cy:nodeId="720">
    <graphics x="642.492431640625" z="0.0" y="4005.970947265625"/>
  </node>
  <node id="31628" label="WP_083296959_3" cy:nodeId="721">
    <graphics x="818.6630249023438" z="0.0" y="3901.874755859375"/>
  </node>
  <node id="31627" label="WP_082931047_3" cy:nodeId="722">
    <graphics x="923.1082763671875" z="0.0" y="3928.482666015625"/>
  </node>
  <node id="31626" label="EWM64891_3" cy:nodeId="723">
    <graphics x="847.820556640625" z="0.0" y="4005.64306640625"/>
  </node>
  <node id="31625" label="WP_099279259_5" cy:nodeId="724">
    <graphics x="1023.1082763671875" z="0.0" y="3901.874755859375"/>
  </node>
  <node id="31624" label="WP_134664144_5" cy:nodeId="725">
    <graphics x="1127.2415771484375" z="0.0" y="3929.681884765625"/>
  </node>
  <node id="31623" label="WP_134664144_7" cy:nodeId="726">
    <graphics x="1051.071044921875" z="0.0" y="4005.970947265625"/>
  </node>
  <node id="31622" label="WP_098695120_3" cy:nodeId="727">
    <graphics x="1227.2415771484375" z="0.0" y="3901.874755859375"/>
  </node>
  <node id="31621" label="WP_082871442_2" cy:nodeId="728">
    <graphics x="1331.6868896484375" z="0.0" y="3928.482666015625"/>
  </node>
  <node id="31620" label="KZM72684_2" cy:nodeId="729">
    <graphics x="1256.3990478515625" z="0.0" y="4005.64306640625"/>
  </node>
  <node id="31619" label="SDH11838_5" cy:nodeId="730">
    <graphics x="1431.6868896484375" z="0.0" y="3901.874755859375"/>
  </node>
  <node id="31618" label="WP_093170892_5" cy:nodeId="731">
    <graphics x="1537.6380615234375" z="0.0" y="3921.632080078125"/>
  </node>
  <node id="31617" label="WP_093170943_3" cy:nodeId="732">
    <graphics x="1467.5338134765625" z="0.0" y="4003.528076171875"/>
  </node>
  <node id="31616" label="WP_131103335_2" cy:nodeId="733">
    <graphics x="1637.6380615234375" z="0.0" y="3901.874755859375"/>
  </node>
  <node id="31615" label="KLO64220_4" cy:nodeId="734">
    <graphics x="1654.9766845703125" z="0.0" y="4008.251220703125"/>
  </node>
  <node id="31614" label="WP_082128669_2" cy:nodeId="735">
    <graphics x="1738.44775390625" z="0.0" y="3940.02734375"/>
  </node>
  <node id="31613" label="EWM64891_2" cy:nodeId="736">
    <graphics x="1838.44775390625" z="0.0" y="3901.874755859375"/>
  </node>
  <node id="31612" label="WP_082931047_2" cy:nodeId="737">
    <graphics x="1944.3990478515625" z="0.0" y="3921.632080078125"/>
  </node>
  <node id="31611" label="WP_083296959_2" cy:nodeId="738">
    <graphics x="1874.2947998046875" z="0.0" y="4003.528076171875"/>
  </node>
  <node id="31610" label="WP_125547276_1" cy:nodeId="739">
    <graphics x="2044.39892578125" z="0.0" y="3901.874755859375"/>
  </node>
  <node id="31609" label="CUM40551_5" cy:nodeId="740">
    <graphics x="2148.5322265625" z="0.0" y="3929.681884765625"/>
  </node>
  <node id="31608" label="WP_079037558_6" cy:nodeId="741">
    <graphics x="2072.36181640625" z="0.0" y="4005.970947265625"/>
  </node>
  <node id="31607" label="SDE51953_1" cy:nodeId="742">
    <graphics x="2248.5322265625" z="0.0" y="3901.874755859375"/>
  </node>
  <node id="31606" label="WP_091040567_2" cy:nodeId="743">
    <graphics x="2352.66552734375" z="0.0" y="3929.681884765625"/>
  </node>
  <node id="31605" label="WP_082822395_1" cy:nodeId="744">
    <graphics x="2276.494873046875" z="0.0" y="4005.970947265625"/>
  </node>
  <node id="31604" label="WP_093170892_2" cy:nodeId="745">
    <graphics x="2452.66552734375" z="0.0" y="3901.874755859375"/>
  </node>
  <node id="31603" label="WP_093170943_1" cy:nodeId="746">
    <graphics x="2558.61669921875" z="0.0" y="3921.632080078125"/>
  </node>
  <node id="31602" label="SDH11838_2" cy:nodeId="747">
    <graphics x="2488.512451171875" z="0.0" y="4003.528076171875"/>
  </node>
  <node id="31601" label="WP_132619812_2" cy:nodeId="748">
    <graphics x="2658.61669921875" z="0.0" y="3901.874755859375"/>
  </node>
  <node id="31600" label="WP_009951067_2" cy:nodeId="749">
    <graphics x="2675.955322265625" z="0.0" y="4008.251220703125"/>
  </node>
  <node id="31599" label="CAM04239_3" cy:nodeId="750">
    <graphics x="2759.426513671875" z="0.0" y="3940.02734375"/>
  </node>
  <node id="31598" label="WP_052318929_1" cy:nodeId="751">
    <graphics x="2859.426513671875" z="0.0" y="3901.874755859375"/>
  </node>
  <node id="31597" label="AKJ13608_3" cy:nodeId="752">
    <graphics x="2963.5595703125" z="0.0" y="3929.681884765625"/>
  </node>
  <node id="31596" label="KIE24863_1" cy:nodeId="753">
    <graphics x="2887.38916015625" z="0.0" y="4005.970947265625"/>
  </node>
  <node id="31595" label="WP_125792333_4" cy:nodeId="754">
    <graphics x="3063.5595703125" z="0.0" y="4112.99609375"/>
  </node>
  <node id="31594" label="WP_093601012_1" cy:nodeId="755">
    <graphics x="3111.005126953125" z="0.0" y="3901.874755859375"/>
  </node>
  <node id="31593" label="SFK92414_3" cy:nodeId="756">
    <graphics x="3089.112548828125" z="0.0" y="4008.263916015625"/>
  </node>
  <node id="31592" label="WP_130490932_1" cy:nodeId="757">
    <graphics x="3211.005126953125" z="0.0" y="3901.874755859375"/>
  </node>
  <node id="31591" label="WP_129176857_3" cy:nodeId="758">
    <graphics x="3300.16259765625" z="0.0" y="3963.90771484375"/>
  </node>
  <node id="31590" label="WP_053775070_2" cy:nodeId="759">
    <graphics x="3383.11474609375" z="0.0" y="4032.73291015625"/>
  </node>
  <node id="31589" label="WP_070795263_3" cy:nodeId="760">
    <graphics x="3483.11474609375" z="0.0" y="3901.874755859375"/>
  </node>
  <node id="31588" label="WP_088246551_3" cy:nodeId="761">
    <graphics x="3587.248046875" z="0.0" y="3929.681884765625"/>
  </node>
  <node id="31587" label="OMO45941_2" cy:nodeId="762">
    <graphics x="3511.07763671875" z="0.0" y="4005.970947265625"/>
  </node>
  <node id="31586" label="EME16460_2" cy:nodeId="763">
    <graphics x="3687.248046875" z="0.0" y="3901.874755859375"/>
  </node>
  <node id="31585" label="WP_007536321_2" cy:nodeId="764">
    <graphics x="3793.19921875" z="0.0" y="3921.632080078125"/>
  </node>
  <node id="31584" label="WP_043809367_2" cy:nodeId="765">
    <graphics x="3723.09521484375" z="0.0" y="4003.528076171875"/>
  </node>
  <node id="31583" label="WP_110565442_9001" cy:nodeId="766">
    <graphics x="3893.19921875" z="0.0" y="3901.874755859375"/>
  </node>
  <node id="31582" label="WP_074475319_9003" cy:nodeId="767">
    <graphics x="3997.64453125" z="0.0" y="3928.482666015625"/>
  </node>
  <node id="31581" label="WP_091614694_9002" cy:nodeId="768">
    <graphics x="3922.35693359375" z="0.0" y="4005.64306640625"/>
  </node>
  <node id="31580" label="WP_061300719_1" cy:nodeId="769">
    <graphics x="4097.64453125" z="0.0" y="3901.874755859375"/>
  </node>
  <node id="31579" label="WP_061300720_1" cy:nodeId="770">
    <graphics x="4202.08984375" z="0.0" y="3928.482666015625"/>
  </node>
  <node id="31578" label="WP_061300721_1" cy:nodeId="771">
    <graphics x="4126.80224609375" z="0.0" y="4005.64306640625"/>
  </node>
  <node id="31577" label="WP_092888237_1" cy:nodeId="772">
    <graphics x="4302.08984375" z="0.0" y="3901.874755859375"/>
  </node>
  <node id="31576" label="WP_092888237_3" cy:nodeId="773">
    <graphics x="4319.4287109375" z="0.0" y="4008.251220703125"/>
  </node>
  <node id="31575" label="WP_135971800_3" cy:nodeId="774">
    <graphics x="4402.89990234375" z="0.0" y="3940.02734375"/>
  </node>
  <node id="31574" label="WP_092807119_3" cy:nodeId="775">
    <graphics x="4502.89990234375" z="0.0" y="3901.874755859375"/>
  </node>
  <node id="31573" label="WP_091247291_2" cy:nodeId="776">
    <graphics x="4607.03271484375" z="0.0" y="3929.681884765625"/>
  </node>
  <node id="31572" label="SCX58064_3" cy:nodeId="777">
    <graphics x="4530.8623046875" z="0.0" y="4005.970947265625"/>
  </node>
  <node id="31571" label="SFI84698_2" cy:nodeId="778">
    <graphics x="4707.03271484375" z="0.0" y="3901.874755859375"/>
  </node>
  <node id="31570" label="ACZ89043_3" cy:nodeId="779">
    <graphics x="4811.47802734375" z="0.0" y="3928.482666015625"/>
  </node>
  <node id="31569" label="WP_081937495_2" cy:nodeId="780">
    <graphics x="4736.1904296875" z="0.0" y="4005.64306640625"/>
  </node>
  <node id="31568" label="WP_130329265_1" cy:nodeId="781">
    <graphics x="4911.47802734375" z="0.0" y="3901.874755859375"/>
  </node>
  <node id="31567" label="WP_044386624_1" cy:nodeId="782">
    <graphics x="5017.42919921875" z="0.0" y="3921.632080078125"/>
  </node>
  <node id="31566" label="WP_116150435_1" cy:nodeId="783">
    <graphics x="4947.3251953125" z="0.0" y="4003.528076171875"/>
  </node>
  <node id="31565" label="RKS80725_1" cy:nodeId="784">
    <graphics x="0.0" z="0.0" y="4212.99609375"/>
  </node>
  <node id="31564" label="WP_121191582_1" cy:nodeId="785">
    <graphics x="104.13323974609375" z="0.0" y="4240.80322265625"/>
  </node>
  <node id="31563" label="WP_007495061_1" cy:nodeId="786">
    <graphics x="27.96269989013672" z="0.0" y="4317.09228515625"/>
  </node>
  <node id="31562" label="ESU58068_3" cy:nodeId="787">
    <graphics x="204.13323974609375" z="0.0" y="4212.99609375"/>
  </node>
  <node id="31561" label="WP_046096646_3" cy:nodeId="788">
    <graphics x="308.57855224609375" z="0.0" y="4239.60400390625"/>
  </node>
  <node id="31560" label="WP_087454414_3" cy:nodeId="789">
    <graphics x="233.29078674316406" z="0.0" y="4316.76416015625"/>
  </node>
  <node id="31559" label="KUM76187_1" cy:nodeId="790">
    <graphics x="408.57855224609375" z="0.0" y="4212.99609375"/>
  </node>
  <node id="31558" label="WP_079051299_1" cy:nodeId="791">
    <graphics x="514.52978515625" z="0.0" y="4232.75341796875"/>
  </node>
  <node id="31557" label="AFJ68075_1" cy:nodeId="792">
    <graphics x="444.4255676269531" z="0.0" y="4314.6494140625"/>
  </node>
  <node id="31556" label="SDG32337_1" cy:nodeId="793">
    <graphics x="614.52978515625" z="0.0" y="4212.99609375"/>
  </node>
  <node id="31555" label="WP_090009591_1" cy:nodeId="794">
    <graphics x="631.868408203125" z="0.0" y="4319.37255859375"/>
  </node>
  <node id="31554" label="SDL74859_1" cy:nodeId="795">
    <graphics x="715.3394775390625" z="0.0" y="4251.1484375"/>
  </node>
  <node id="31553" label="WP_083603298_2" cy:nodeId="796">
    <graphics x="815.3394775390625" z="0.0" y="4212.99609375"/>
  </node>
  <node id="31552" label="OKL53160_2" cy:nodeId="797">
    <graphics x="919.7847900390625" z="0.0" y="4239.60400390625"/>
  </node>
  <node id="31551" label="WP_082248115_2" cy:nodeId="798">
    <graphics x="844.4970703125" z="0.0" y="4316.76416015625"/>
  </node>
  <node id="31550" label="WP_066217216_1" cy:nodeId="799">
    <graphics x="1019.7847900390625" z="0.0" y="4212.99609375"/>
  </node>
  <node id="31549" label="WP_082724316_1" cy:nodeId="800">
    <graphics x="1123.9180908203125" z="0.0" y="4240.80322265625"/>
  </node>
  <node id="31548" label="SEB29931_3" cy:nodeId="801">
    <graphics x="1047.74755859375" z="0.0" y="4317.09228515625"/>
  </node>
  <node id="31547" label="AXG59058_1" cy:nodeId="802">
    <graphics x="1223.9180908203125" z="0.0" y="4212.99609375"/>
  </node>
  <node id="31546" label="WP_079164984_1" cy:nodeId="803">
    <graphics x="1328.3634033203125" z="0.0" y="4239.60400390625"/>
  </node>
  <node id="31545" label="ANS70161_1" cy:nodeId="804">
    <graphics x="1253.0755615234375" z="0.0" y="4316.76416015625"/>
  </node>
  <node id="31544" label="WP_083597719_2" cy:nodeId="805">
    <graphics x="1428.3634033203125" z="0.0" y="4212.99609375"/>
  </node>
  <node id="31543" label="WP_101786715_1" cy:nodeId="806">
    <graphics x="1445.7020263671875" z="0.0" y="4319.37255859375"/>
  </node>
  <node id="31542" label="SFO39709_2" cy:nodeId="807">
    <graphics x="1529.173095703125" z="0.0" y="4251.1484375"/>
  </node>
  <node id="31541" label="KUN25245_4" cy:nodeId="808">
    <graphics x="1629.173095703125" z="0.0" y="4212.99609375"/>
  </node>
  <node id="31540" label="WP_059193363_4" cy:nodeId="809">
    <graphics x="1733.3062744140625" z="0.0" y="4240.80322265625"/>
  </node>
  <node id="31539" label="WP_107120384_4" cy:nodeId="810">
    <graphics x="1657.1357421875" z="0.0" y="4317.09228515625"/>
  </node>
  <node id="31538" label="RKT36058_2" cy:nodeId="811">
    <graphics x="1833.3062744140625" z="0.0" y="4212.99609375"/>
  </node>
  <node id="31537" label="WP_058623611_1" cy:nodeId="812">
    <graphics x="1937.4395751953125" z="0.0" y="4240.80322265625"/>
  </node>
  <node id="31536" label="WP_121148667_1" cy:nodeId="813">
    <graphics x="1861.26904296875" z="0.0" y="4317.09228515625"/>
  </node>
  <node id="31535" label="WP_051816122_1" cy:nodeId="814">
    <graphics x="2037.439453125" z="0.0" y="4212.99609375"/>
  </node>
  <node id="31534" label="WP_111506795_3" cy:nodeId="815">
    <graphics x="2141.57275390625" z="0.0" y="4240.80322265625"/>
  </node>
  <node id="31533" label="WP_125499925_1" cy:nodeId="816">
    <graphics x="2065.40234375" z="0.0" y="4317.09228515625"/>
  </node>
  <node id="31532" label="WP_083318853_2" cy:nodeId="817">
    <graphics x="2241.57275390625" z="0.0" y="4212.99609375"/>
  </node>
  <node id="31531" label="WP_083304061_2" cy:nodeId="818">
    <graphics x="2346.01806640625" z="0.0" y="4239.60400390625"/>
  </node>
  <node id="31530" label="OFL66352_2" cy:nodeId="819">
    <graphics x="2270.73046875" z="0.0" y="4316.76416015625"/>
  </node>
  <node id="31529" label="WP_057232473_1" cy:nodeId="820">
    <graphics x="2446.01806640625" z="0.0" y="4424.1171875"/>
  </node>
  <node id="31528" label="WP_128378882_1" cy:nodeId="821">
    <graphics x="2493.463623046875" z="0.0" y="4212.99609375"/>
  </node>
  <node id="31527" label="WP_030269598_1" cy:nodeId="822">
    <graphics x="2471.571044921875" z="0.0" y="4319.38525390625"/>
  </node>
  <node id="31526" label="KUN25245_2" cy:nodeId="823">
    <graphics x="2593.463623046875" z="0.0" y="4212.99609375"/>
  </node>
  <node id="31525" label="WP_107120384_2" cy:nodeId="824">
    <graphics x="2697.908935546875" z="0.0" y="4239.60400390625"/>
  </node>
  <node id="31524" label="WP_059193363_2" cy:nodeId="825">
    <graphics x="2622.62109375" z="0.0" y="4316.76416015625"/>
  </node>
  <node id="31523" label="RPK69291_1" cy:nodeId="826">
    <graphics x="2797.908935546875" z="0.0" y="4212.99609375"/>
  </node>
  <node id="31522" label="WP_124271723_1" cy:nodeId="827">
    <graphics x="2902.354248046875" z="0.0" y="4239.60400390625"/>
  </node>
  <node id="31521" label="WP_116209352_1" cy:nodeId="828">
    <graphics x="2827.06640625" z="0.0" y="4316.76416015625"/>
  </node>
  <node id="31520" label="OIJ88146_4" cy:nodeId="829">
    <graphics x="3002.354248046875" z="0.0" y="4212.99609375"/>
  </node>
  <node id="31519" label="WP_023554016_1" cy:nodeId="830">
    <graphics x="3106.799560546875" z="0.0" y="4239.60400390625"/>
  </node>
  <node id="31518" label="WP_079177123_4" cy:nodeId="831">
    <graphics x="3031.51171875" z="0.0" y="4316.76416015625"/>
  </node>
  <node id="31517" label="AGC62644_1" cy:nodeId="832">
    <graphics x="3206.799560546875" z="0.0" y="4212.99609375"/>
  </node>
  <node id="31516" label="CDM77002_2" cy:nodeId="833">
    <graphics x="3310.932861328125" z="0.0" y="4240.80322265625"/>
  </node>
  <node id="31515" label="WP_020787304_1" cy:nodeId="834">
    <graphics x="3234.76220703125" z="0.0" y="4317.09228515625"/>
  </node>
  <node id="31514" label="WP_030877129_2" cy:nodeId="835">
    <graphics x="3410.932861328125" z="0.0" y="4212.99609375"/>
  </node>
  <node id="31513" label="WP_082871442_1" cy:nodeId="836">
    <graphics x="3515.06591796875" z="0.0" y="4240.80322265625"/>
  </node>
  <node id="31512" label="KZM72684_1" cy:nodeId="837">
    <graphics x="3438.8955078125" z="0.0" y="4317.09228515625"/>
  </node>
  <node id="31511" label="WP_067972339_5" cy:nodeId="838">
    <graphics x="3615.06591796875" z="0.0" y="4212.99609375"/>
  </node>
  <node id="31510" label="KPC62607_3" cy:nodeId="839">
    <graphics x="3632.40478515625" z="0.0" y="4319.37255859375"/>
  </node>
  <node id="31509" label="WP_078971081_3" cy:nodeId="840">
    <graphics x="3715.875732421875" z="0.0" y="4251.1484375"/>
  </node>
  <node id="31508" label="SER15522_1" cy:nodeId="841">
    <graphics x="3815.875732421875" z="0.0" y="4212.99609375"/>
  </node>
  <node id="31507" label="SMC91639_1" cy:nodeId="842">
    <graphics x="3920.321044921875" z="0.0" y="4239.60400390625"/>
  </node>
  <node id="31506" label="WP_089952439_1" cy:nodeId="843">
    <graphics x="3845.033203125" z="0.0" y="4316.76416015625"/>
  </node>
  <node id="31505" label="AKJ13608_5" cy:nodeId="844">
    <graphics x="4020.321044921875" z="0.0" y="4212.99609375"/>
  </node>
  <node id="31504" label="WP_055553439_1" cy:nodeId="845">
    <graphics x="4126.2724609375" z="0.0" y="4232.75341796875"/>
  </node>
  <node id="31503" label="WP_037862255_2" cy:nodeId="846">
    <graphics x="4056.168212890625" z="0.0" y="4314.6494140625"/>
  </node>
  <node id="31502" label="WP_006143940_1" cy:nodeId="847">
    <graphics x="4226.2724609375" z="0.0" y="4212.99609375"/>
  </node>
  <node id="31501" label="WP_100806338_2" cy:nodeId="848">
    <graphics x="4330.40576171875" z="0.0" y="4240.80322265625"/>
  </node>
  <node id="31500" label="WP_126890470_1" cy:nodeId="849">
    <graphics x="4254.23486328125" z="0.0" y="4317.09228515625"/>
  </node>
  <node id="31499" label="WP_104181080_1" cy:nodeId="850">
    <graphics x="4430.40576171875" z="0.0" y="4212.99609375"/>
  </node>
  <node id="31498" label="WP_098514311_1" cy:nodeId="851">
    <graphics x="4447.744140625" z="0.0" y="4319.37255859375"/>
  </node>
  <node id="31497" label="WP_105032337_1" cy:nodeId="852">
    <graphics x="4531.21533203125" z="0.0" y="4251.1484375"/>
  </node>
  <node id="31496" label="PJJ39560_4" cy:nodeId="853">
    <graphics x="4631.21533203125" z="0.0" y="4212.99609375"/>
  </node>
  <node id="31495" label="WP_100302786_4" cy:nodeId="854">
    <graphics x="4735.66064453125" z="0.0" y="4239.60400390625"/>
  </node>
  <node id="31494" label="WP_078564093_4" cy:nodeId="855">
    <graphics x="4660.373046875" z="0.0" y="4316.76416015625"/>
  </node>
  <node id="31493" label="WP_057608322_3" cy:nodeId="856">
    <graphics x="4835.66064453125" z="0.0" y="4424.1171875"/>
  </node>
  <node id="31492" label="WP_123074529_4" cy:nodeId="857">
    <graphics x="4883.10595703125" z="0.0" y="4212.99609375"/>
  </node>
  <node id="31491" label="WP_094009173_4" cy:nodeId="858">
    <graphics x="4861.21337890625" z="0.0" y="4319.38525390625"/>
  </node>
  <node id="31490" label="WP_101557151_1" cy:nodeId="859">
    <graphics x="4983.10595703125" z="0.0" y="4212.99609375"/>
  </node>
  <node id="31489" label="WP_101557149_1" cy:nodeId="860">
    <graphics x="5089.05712890625" z="0.0" y="4232.75341796875"/>
  </node>
  <node id="31488" label="WP_116200011_2" cy:nodeId="861">
    <graphics x="5018.953125" z="0.0" y="4314.6494140625"/>
  </node>
  <node id="31487" label="WP_061409829_2" cy:nodeId="862">
    <graphics x="0.0" z="0.0" y="4524.1171875"/>
  </node>
  <node id="31486" label="WP_075142776_2" cy:nodeId="863">
    <graphics x="104.4453125" z="0.0" y="4550.72509765625"/>
  </node>
  <node id="31485" label="AFK17249_2" cy:nodeId="864">
    <graphics x="29.157550811767578" z="0.0" y="4627.88525390625"/>
  </node>
  <node id="31484" label="WP_078561279_4" cy:nodeId="865">
    <graphics x="204.4453125" z="0.0" y="4524.1171875"/>
  </node>
  <node id="31483" label="WP_014690715_1" cy:nodeId="866">
    <graphics x="221.7839813232422" z="0.0" y="4630.49365234375"/>
  </node>
  <node id="31482" label="EFL12569_3" cy:nodeId="867">
    <graphics x="305.2550354003906" z="0.0" y="4562.26953125"/>
  </node>
  <node id="31481" label="WP_071042996_1" cy:nodeId="868">
    <graphics x="405.2550354003906" z="0.0" y="4524.1171875"/>
  </node>
  <node id="31480" label="WP_104167780_1" cy:nodeId="869">
    <graphics x="509.70037841796875" z="0.0" y="4550.72509765625"/>
  </node>
  <node id="31479" label="WP_071042994_1" cy:nodeId="870">
    <graphics x="434.41259765625" z="0.0" y="4627.88525390625"/>
  </node>
  <node id="31478" label="WP_113979657_5" cy:nodeId="871">
    <graphics x="609.7003784179688" z="0.0" y="4524.1171875"/>
  </node>
  <node id="31477" label="ANN17130_2" cy:nodeId="872">
    <graphics x="698.85791015625" z="0.0" y="4586.150390625"/>
  </node>
  <node id="31476" label="WP_103341360_2" cy:nodeId="873">
    <graphics x="781.81005859375" z="0.0" y="4654.9755859375"/>
  </node>
  <node id="31475" label="WP_111209344_1" cy:nodeId="874">
    <graphics x="881.81005859375" z="0.0" y="4524.1171875"/>
  </node>
  <node id="31474" label="WP_110911190_2" cy:nodeId="875">
    <graphics x="899.148681640625" z="0.0" y="4630.49365234375"/>
  </node>
  <node id="31473" label="SBN62121_2" cy:nodeId="876">
    <graphics x="982.6197509765625" z="0.0" y="4562.26953125"/>
  </node>
  <node id="31472" label="WP_070739770_2" cy:nodeId="877">
    <graphics x="1082.6197509765625" z="0.0" y="4524.1171875"/>
  </node>
  <node id="31471" label="WP_070739770_4" cy:nodeId="878">
    <graphics x="1186.7530517578125" z="0.0" y="4551.92431640625"/>
  </node>
  <node id="31470" label="WP_070739770_3" cy:nodeId="879">
    <graphics x="1110.58251953125" z="0.0" y="4628.21337890625"/>
  </node>
  <node id="31469" label="WP_082057091_2" cy:nodeId="880">
    <graphics x="1286.7530517578125" z="0.0" y="4524.1171875"/>
  </node>
  <node id="31468" label="WP_131626375_2" cy:nodeId="881">
    <graphics x="1392.7042236328125" z="0.0" y="4543.87451171875"/>
  </node>
  <node id="31467" label="AJT41785_2" cy:nodeId="882">
    <graphics x="1322.5999755859375" z="0.0" y="4625.7705078125"/>
  </node>
  <node id="31466" label="WP_054567598_3" cy:nodeId="883">
    <graphics x="1592.3277587890625" z="0.0" y="3207.158203125"/>
  </node>
  <node id="31465" label="WP_091272827_2" cy:nodeId="884">
    <graphics x="1690.7904052734375" z="0.0" y="3293.484375"/>
  </node>
  <node id="31464" label="WP_091272829_2" cy:nodeId="885">
    <graphics x="1598.4346923828125" z="0.0" y="3299.324462890625"/>
  </node>
  <node id="31463" label="WP_076824657_3" cy:nodeId="886">
    <graphics x="1684.5384521484375" z="0.0" y="3201.1689453125"/>
  </node>
  <node id="31462" label="SIR58548_3" cy:nodeId="887">
    <graphics x="1790.7904052734375" z="0.0" y="3257.793212890625"/>
  </node>
  <node id="31461" label="WP_113985589_4" cy:nodeId="888">
    <graphics x="1862.867431640625" z="0.0" y="3201.1689453125"/>
  </node>
  <node id="31460" label="WP_111167565_5" cy:nodeId="889">
    <graphics x="1846.4046630859375" z="0.0" y="3331.575439453125"/>
  </node>
  <node id="31459" label="WP_049570352_6" cy:nodeId="890">
    <graphics x="1921.401611328125" z="0.0" y="3272.689453125"/>
  </node>
  <node id="31458" label="WP_075012634_3" cy:nodeId="891">
    <graphics x="2147.913330078125" z="0.0" y="3281.015625"/>
  </node>
  <node id="31457" label="WP_093583210_4" cy:nodeId="892">
    <graphics x="2101.604736328125" z="0.0" y="3201.1689453125"/>
  </node>
  <node id="31456" label="SFO01480_4" cy:nodeId="893">
    <graphics x="2021.401611328125" z="0.0" y="3245.623291015625"/>
  </node>
  <node id="31455" label="WP_089404560_4" cy:nodeId="894">
    <graphics x="2064.69921875" z="0.0" y="3327.30419921875"/>
  </node>
  <node id="31454" label="WP_061300623_4" cy:nodeId="895">
    <graphics x="2374.4248046875" z="0.0" y="3281.015625"/>
  </node>
  <node id="31453" label="WP_062349267_3" cy:nodeId="896">
    <graphics x="2247.913330078125" z="0.0" y="3245.623291015625"/>
  </node>
  <node id="31452" label="WP_066366076_4" cy:nodeId="897">
    <graphics x="2291.2109375" z="0.0" y="3327.30419921875"/>
  </node>
  <node id="31451" label="WP_062440803_4" cy:nodeId="898">
    <graphics x="2328.1162109375" z="0.0" y="3201.1689453125"/>
  </node>
  <node id="31450" label="WP_088986452_1" cy:nodeId="899">
    <graphics x="2504.590087890625" z="0.0" y="3318.649658203125"/>
  </node>
  <node id="31449" label="SCE72235_1" cy:nodeId="900">
    <graphics x="2561.945556640625" z="0.0" y="3201.1689453125"/>
  </node>
  <node id="31448" label="SCE72260_1" cy:nodeId="901">
    <graphics x="2474.4248046875" z="0.0" y="3231.16845703125"/>
  </node>
  <node id="31447" label="WP_088991224_1" cy:nodeId="902">
    <graphics x="2592.0986328125" z="0.0" y="3288.623779296875"/>
  </node>
  <node id="31446" label="WP_017568552_2" cy:nodeId="903">
    <graphics x="2692.0986328125" z="0.0" y="3232.97216796875"/>
  </node>
  <node id="31445" label="WP_121185217_1" cy:nodeId="904">
    <graphics x="2779.0009765625" z="0.0" y="3201.1689453125"/>
  </node>
  <node id="31444" label="WP_017568553_2" cy:nodeId="905">
    <graphics x="2811.39892578125" z="0.0" y="3287.19189453125"/>
  </node>
  <node id="31443" label="WP_121185218_2" cy:nodeId="906">
    <graphics x="2725.3095703125" z="0.0" y="3319.407470703125"/>
  </node>
  <node id="31442" label="WP_089156471_1" cy:nodeId="907">
    <graphics x="2911.39892578125" z="0.0" y="3201.1689453125"/>
  </node>
  <node id="31441" label="WP_015663091_5" cy:nodeId="908">
    <graphics x="2953.33642578125" z="0.0" y="3301.76171875"/>
  </node>
  <node id="31440" label="WP_084902797_1" cy:nodeId="909">
    <graphics x="3019.075439453125" z="0.0" y="3217.975830078125"/>
  </node>
  <node id="31439" label="WP_125813086_6" cy:nodeId="910">
    <graphics x="3061.086181640625" z="0.0" y="3318.531005859375"/>
  </node>
  <node id="31438" label="WP_033306993_1" cy:nodeId="911">
    <graphics x="3175.70166015625" z="0.0" y="3201.1689453125"/>
  </node>
  <node id="31437" label="WP_029068734_1" cy:nodeId="912">
    <graphics x="3266.981201171875" z="0.0" y="3215.781982421875"/>
  </node>
  <node id="31436" label="WP_034274384_1" cy:nodeId="913">
    <graphics x="3161.086181640625" z="0.0" y="3292.49853515625"/>
  </node>
  <node id="31435" label="WP_081655210_1" cy:nodeId="914">
    <graphics x="3252.396484375" z="0.0" y="3307.07861328125"/>
  </node>
  <node id="31434" label="WP_093655900_1" cy:nodeId="915">
    <graphics x="3397.146484375" z="0.0" y="3318.649658203125"/>
  </node>
  <node id="31433" label="WP_085014622_1" cy:nodeId="916">
    <graphics x="3454.501953125" z="0.0" y="3201.1689453125"/>
  </node>
  <node id="31432" label="WP_093849541_4" cy:nodeId="917">
    <graphics x="3366.981201171875" z="0.0" y="3231.16845703125"/>
  </node>
  <node id="31431" label="WP_085014620_1" cy:nodeId="918">
    <graphics x="3484.65478515625" z="0.0" y="3288.623779296875"/>
  </node>
  <node id="31430" label="WP_131883639_1" cy:nodeId="919">
    <graphics x="3584.65478515625" z="0.0" y="3232.97216796875"/>
  </node>
  <node id="31429" label="WP_135231520_1" cy:nodeId="920">
    <graphics x="3703.955078125" z="0.0" y="3287.19189453125"/>
  </node>
  <node id="31428" label="WP_132175704_1" cy:nodeId="921">
    <graphics x="3671.557373046875" z="0.0" y="3201.1689453125"/>
  </node>
  <node id="31427" label="WP_131965720_1" cy:nodeId="922">
    <graphics x="3617.865966796875" z="0.0" y="3319.407470703125"/>
  </node>
  <node id="31426" label="KOG82578_1" cy:nodeId="923">
    <graphics x="3803.955078125" z="0.0" y="3232.97216796875"/>
  </node>
  <node id="31425" label="WP_083191919_1" cy:nodeId="924">
    <graphics x="3890.857666015625" z="0.0" y="3201.1689453125"/>
  </node>
  <node id="31424" label="SDE31545_1" cy:nodeId="925">
    <graphics x="3923.25537109375" z="0.0" y="3287.19189453125"/>
  </node>
  <node id="31423" label="KOU46944_1" cy:nodeId="926">
    <graphics x="3837.166015625" z="0.0" y="3319.407470703125"/>
  </node>
  <node id="31422" label="WP_091051455_1" cy:nodeId="927">
    <graphics x="4023.25537109375" z="0.0" y="3207.158203125"/>
  </node>
  <node id="31421" label="WP_105032337_4" cy:nodeId="928">
    <graphics x="4121.7177734375" z="0.0" y="3293.484375"/>
  </node>
  <node id="31420" label="SDL22458_1" cy:nodeId="929">
    <graphics x="4029.362060546875" z="0.0" y="3299.324462890625"/>
  </node>
  <node id="31419" label="WP_104181080_4" cy:nodeId="930">
    <graphics x="4115.4658203125" z="0.0" y="3201.1689453125"/>
  </node>
  <node id="31418" label="SCL44965_4" cy:nodeId="931">
    <graphics x="4236.33349609375" z="0.0" y="3201.1689453125"/>
  </node>
  <node id="31417" label="WP_091094891_2" cy:nodeId="932">
    <graphics x="4327.61279296875" z="0.0" y="3215.781982421875"/>
  </node>
  <node id="31416" label="WP_111166051_2" cy:nodeId="933">
    <graphics x="4221.7177734375" z="0.0" y="3292.49853515625"/>
  </node>
  <node id="31415" label="WP_067972339_2" cy:nodeId="934">
    <graphics x="4313.0283203125" z="0.0" y="3307.07861328125"/>
  </node>
  <node id="31414" label="WP_132268317_3" cy:nodeId="935">
    <graphics x="4457.7783203125" z="0.0" y="3318.649658203125"/>
  </node>
  <node id="31413" label="WP_132388264_4" cy:nodeId="936">
    <graphics x="4545.28662109375" z="0.0" y="3288.623779296875"/>
  </node>
  <node id="31412" label="WP_132388266_4" cy:nodeId="937">
    <graphics x="4427.61279296875" z="0.0" y="3231.16845703125"/>
  </node>
  <node id="31411" label="WP_132268319_3" cy:nodeId="938">
    <graphics x="4515.1337890625" z="0.0" y="3201.1689453125"/>
  </node>
  <node id="31410" label="KHK96352_4" cy:nodeId="939">
    <graphics x="4645.28662109375" z="0.0" y="3201.1689453125"/>
  </node>
  <node id="31409" label="WP_082008308_3" cy:nodeId="940">
    <graphics x="4654.54443359375" z="0.0" y="3308.253662109375"/>
  </node>
  <node id="31408" label="WP_083982727_3" cy:nodeId="941">
    <graphics x="4744.4287109375" z="0.0" y="3246.57275390625"/>
  </node>
  <node id="31407" label="WP_083982727_4" cy:nodeId="942">
    <graphics x="4853.939453125" z="0.0" y="3246.06201171875"/>
  </node>
  <node id="31406" label="WP_017568552_1" cy:nodeId="943">
    <graphics x="4968.5546875" z="0.0" y="3201.1689453125"/>
  </node>
  <node id="31405" label="WP_017568553_1" cy:nodeId="944">
    <graphics x="5059.83447265625" z="0.0" y="3215.781982421875"/>
  </node>
  <node id="31404" label="WP_078515914_1" cy:nodeId="945">
    <graphics x="4953.939453125" z="0.0" y="3292.49853515625"/>
  </node>
  <node id="31403" label="WP_028427539_1" cy:nodeId="946">
    <graphics x="5045.24951171875" z="0.0" y="3307.07861328125"/>
  </node>
  <node id="31402" label="WP_091460541_1" cy:nodeId="947">
    <graphics x="0.0" z="0.0" y="3507.2734375"/>
  </node>
  <node id="31401" label="WP_018657395_3" cy:nodeId="948">
    <graphics x="44.65483856201172" z="0.0" y="3607.1640625"/>
  </node>
  <node id="31400" label="WP_121801511_6" cy:nodeId="949">
    <graphics x="148.84805297851562" z="0.0" y="3801.874755859375"/>
  </node>
  <node id="31399" label="WP_132172132_2" cy:nodeId="950">
    <graphics x="94.55635833740234" z="0.0" y="3705.79638671875"/>
  </node>
  <node id="31398" label="WP_132388264_3" cy:nodeId="951">
    <graphics x="279.01336669921875" z="0.0" y="3624.75390625"/>
  </node>
  <node id="31397" label="WP_132186408_2" cy:nodeId="952">
    <graphics x="366.52178955078125" z="0.0" y="3594.728271484375"/>
  </node>
  <node id="31396" label="WP_132186409_2" cy:nodeId="953">
    <graphics x="248.84805297851562" z="0.0" y="3537.272705078125"/>
  </node>
  <node id="31395" label="WP_132388266_3" cy:nodeId="954">
    <graphics x="336.3688049316406" z="0.0" y="3507.2734375"/>
  </node>
  <node id="31394" label="AXK36690_2" cy:nodeId="955">
    <graphics x="597.6710205078125" z="0.0" y="3576.585205078125"/>
  </node>
  <node id="31393" label="WP_027737668_2" cy:nodeId="956">
    <graphics x="536.6019287109375" z="0.0" y="3507.2734375"/>
  </node>
  <node id="31392" label="AXK36692_1" cy:nodeId="957">
    <graphics x="524.8651123046875" z="0.0" y="3638.246826171875"/>
  </node>
  <node id="31391" label="WP_027737671_2" cy:nodeId="958">
    <graphics x="466.52178955078125" z="0.0" y="3566.48876953125"/>
  </node>
  <node id="31390" label="WP_031012255_4" cy:nodeId="959">
    <graphics x="712.286376953125" z="0.0" y="3507.2734375"/>
  </node>
  <node id="31389" label="WP_107442966_6" cy:nodeId="960">
    <graphics x="803.5658569335938" z="0.0" y="3521.886474609375"/>
  </node>
  <node id="31388" label="WP_057576508_4" cy:nodeId="961">
    <graphics x="697.6710205078125" z="0.0" y="3598.602783203125"/>
  </node>
  <node id="31387" label="WP_078909294_8" cy:nodeId="962">
    <graphics x="788.981201171875" z="0.0" y="3613.182861328125"/>
  </node>
  <node id="31386" label="WP_091553165_2" cy:nodeId="963">
    <graphics x="918.1812744140625" z="0.0" y="3507.2734375"/>
  </node>
  <node id="31385" label="SCX58064_2" cy:nodeId="964">
    <graphics x="1009.4608154296875" z="0.0" y="3521.886474609375"/>
  </node>
  <node id="31384" label="WP_091067169_2" cy:nodeId="965">
    <graphics x="903.5658569335938" z="0.0" y="3598.602783203125"/>
  </node>
  <node id="31383" label="WP_092807119_2" cy:nodeId="966">
    <graphics x="994.8760986328125" z="0.0" y="3613.182861328125"/>
  </node>
  <node id="31382" label="OUE27579_2" cy:nodeId="967">
    <graphics x="1109.4608154296875" z="0.0" y="3513.262451171875"/>
  </node>
  <node id="31381" label="WP_086513414_3" cy:nodeId="968">
    <graphics x="1207.92333984375" z="0.0" y="3599.5888671875"/>
  </node>
  <node id="31380" label="OUE27580_2" cy:nodeId="969">
    <graphics x="1115.567626953125" z="0.0" y="3605.4287109375"/>
  </node>
  <node id="31379" label="WP_086513413_3" cy:nodeId="970">
    <graphics x="1201.67138671875" z="0.0" y="3507.2734375"/>
  </node>
  <node id="31378" label="WP_120571834_1" cy:nodeId="971">
    <graphics x="1307.92333984375" z="0.0" y="3599.69970703125"/>
  </node>
  <node id="31377" label="WP_123601959_2" cy:nodeId="972">
    <graphics x="1310.9984130859375" z="0.0" y="3507.2734375"/>
  </node>
  <node id="31376" label="WP_123601960_2" cy:nodeId="973">
    <graphics x="1400.4119873046875" z="0.0" y="3602.773193359375"/>
  </node>
  <node id="31375" label="WP_120571833_1" cy:nodeId="974">
    <graphics x="1403.5086669921875" z="0.0" y="3510.3447265625"/>
  </node>
  <node id="31374" label="WP_107657165_1" cy:nodeId="975">
    <graphics x="1601.4844970703125" z="0.0" y="3599.68505859375"/>
  </node>
  <node id="31373" label="WP_131965720_2" cy:nodeId="976">
    <graphics x="1503.5086669921875" z="0.0" y="3512.831298828125"/>
  </node>
  <node id="31372" label="WP_132175704_2" cy:nodeId="977">
    <graphics x="1509.0889892578125" z="0.0" y="3605.229248046875"/>
  </node>
  <node id="31371" label="WP_135231520_2" cy:nodeId="978">
    <graphics x="1595.81884765625" z="0.0" y="3507.2734375"/>
  </node>
  <node id="31370" label="KDN17331_1" cy:nodeId="979">
    <graphics x="1701.4844970703125" z="0.0" y="3513.262451171875"/>
  </node>
  <node id="31369" label="WP_067592598_1" cy:nodeId="980">
    <graphics x="1793.695068359375" z="0.0" y="3507.2734375"/>
  </node>
  <node id="31368" label="WP_116200011_1" cy:nodeId="981">
    <graphics x="1707.59130859375" z="0.0" y="3605.4287109375"/>
  </node>
  <node id="31367" label="WP_084093827_1" cy:nodeId="982">
    <graphics x="1799.9471435546875" z="0.0" y="3599.5888671875"/>
  </node>
  <node id="31366" label="OMC50887_1" cy:nodeId="983">
    <graphics x="1914.5625" z="0.0" y="3507.2734375"/>
  </node>
  <node id="31365" label="OMC41183_1" cy:nodeId="984">
    <graphics x="2005.842041015625" z="0.0" y="3521.886474609375"/>
  </node>
  <node id="31364" label="WP_083679341_1" cy:nodeId="985">
    <graphics x="1899.9471435546875" z="0.0" y="3598.602783203125"/>
  </node>
  <node id="31363" label="WP_083667099_1" cy:nodeId="986">
    <graphics x="1991.25732421875" z="0.0" y="3613.182861328125"/>
  </node>
  <node id="31362" label="WP_091040567_3" cy:nodeId="987">
    <graphics x="2136.00732421875" z="0.0" y="3624.75390625"/>
  </node>
  <node id="31361" label="WP_091051455_3" cy:nodeId="988">
    <graphics x="2223.515625" z="0.0" y="3594.728271484375"/>
  </node>
  <node id="31360" label="SDL22458_3" cy:nodeId="989">
    <graphics x="2105.842041015625" z="0.0" y="3537.272705078125"/>
  </node>
  <node id="31359" label="SDE51953_2" cy:nodeId="990">
    <graphics x="2193.36279296875" z="0.0" y="3507.2734375"/>
  </node>
  <node id="31358" label="SDE31545_5" cy:nodeId="991">
    <graphics x="2323.515625" z="0.0" y="3563.897705078125"/>
  </node>
  <node id="31357" label="KOU46944_2" cy:nodeId="992">
    <graphics x="2395.5927734375" z="0.0" y="3507.2734375"/>
  </node>
  <node id="31356" label="WP_083191919_5" cy:nodeId="993">
    <graphics x="2379.1298828125" z="0.0" y="3637.679931640625"/>
  </node>
  <node id="31355" label="KOG82578_3" cy:nodeId="994">
    <graphics x="2454.126953125" z="0.0" y="3578.7939453125"/>
  </node>
  <node id="31354" label="SDY68794_1" cy:nodeId="995">
    <graphics x="2624.892578125" z="0.0" y="3637.89208984375"/>
  </node>
  <node id="31353" label="WP_091216389_1" cy:nodeId="996">
    <graphics x="2611.573974609375" z="0.0" y="3507.2734375"/>
  </node>
  <node id="31352" label="SDL97273_1" cy:nodeId="997">
    <graphics x="2554.126953125" z="0.0" y="3578.475830078125"/>
  </node>
  <node id="31351" label="WP_091159224_1" cy:nodeId="998">
    <graphics x="2684.5771484375" z="0.0" y="3563.5537109375"/>
  </node>
  <node id="31350" label="WP_084211656_1" cy:nodeId="999">
    <graphics x="2814.742431640625" z="0.0" y="3624.75390625"/>
  </node>
  <node id="31349" label="ODU05661_1" cy:nodeId="1000">
    <graphics x="2872.097900390625" z="0.0" y="3507.2734375"/>
  </node>
  <node id="31348" label="ALE82507_1" cy:nodeId="1001">
    <graphics x="2784.5771484375" z="0.0" y="3537.272705078125"/>
  </node>
  <node id="31347" label="WP_132047282_3" cy:nodeId="1002">
    <graphics x="2902.2509765625" z="0.0" y="3594.728271484375"/>
  </node>
  <node id="31346" label="WP_026174640_2" cy:nodeId="1003">
    <graphics x="3002.26708984375" z="0.0" y="2823.423828125"/>
  </node>
  <node id="31345" label="SEB29931_2" cy:nodeId="1004">
    <graphics x="2943.19140625" z="0.0" y="2833.846923828125"/>
  </node>
  <node id="31344" label="AJT41785_1" cy:nodeId="1005">
    <graphics x="2904.7919921875" z="0.0" y="2901.923583984375"/>
  </node>
  <node id="31343" label="SEC29390_3" cy:nodeId="1006">
    <graphics x="2823.140625" z="0.0" y="2841.100341796875"/>
  </node>
  <node id="31342" label="WP_082057091_1" cy:nodeId="1007">
    <graphics x="2894.7470703125" z="0.0" y="2770.0283203125"/>
  </node>
  <node id="31341" label="WP_091289566_1" cy:nodeId="1008">
    <graphics x="3132.9609375" z="0.0" y="2876.423583984375"/>
  </node>
  <node id="31340" label="SFB39971_1" cy:nodeId="1009">
    <graphics x="3168.608642578125" z="0.0" y="2770.0283203125"/>
  </node>
  <node id="31339" label="WP_091674323_1" cy:nodeId="1010">
    <graphics x="3102.26708984375" z="0.0" y="2795.0849609375"/>
  </node>
  <node id="31338" label="WP_091289566_3" cy:nodeId="1011">
    <graphics x="3215.6376953125" z="0.0" y="2871.864501953125"/>
  </node>
  <node id="31337" label="WP_091289566_2" cy:nodeId="1012">
    <graphics x="3235.310302734375" z="0.0" y="2784.5068359375"/>
  </node>
  <node id="31336" label="OQM68597_1" cy:nodeId="1013">
    <graphics x="3400.212158203125" z="0.0" y="2770.0283203125"/>
  </node>
  <node id="31335" label="WP_080684945_2" cy:nodeId="1014">
    <graphics x="3462.1474609375" z="0.0" y="2817.6728515625"/>
  </node>
  <node id="31334" label="WP_132339706_2" cy:nodeId="1015">
    <graphics x="3335.310302734375" z="0.0" y="2814.468505859375"/>
  </node>
  <node id="31333" label="WP_082248115_1" cy:nodeId="1016">
    <graphics x="3357.177978515625" z="0.0" y="2889.528076171875"/>
  </node>
  <node id="31332" label="WP_124284474_1" cy:nodeId="1017">
    <graphics x="3436.53173828125" z="0.0" y="2892.84375"/>
  </node>
  <node id="31331" label="WP_109092842_1" cy:nodeId="1018">
    <graphics x="3688.08447265625" z="0.0" y="2824.790283203125"/>
  </node>
  <node id="31330" label="WP_133246044_3" cy:nodeId="1019">
    <graphics x="3631.06201171875" z="0.0" y="2770.0283203125"/>
  </node>
  <node id="31329" label="KTR94659_3" cy:nodeId="1020">
    <graphics x="3562.1474609375" z="0.0" y="2808.791259765625"/>
  </node>
  <node id="31328" label="WP_081323045_3" cy:nodeId="1021">
    <graphics x="3655.176025390625" z="0.0" y="2896.5810546875"/>
  </node>
  <node id="31327" label="PWF27333_3" cy:nodeId="1022">
    <graphics x="3576.739501953125" z="0.0" y="2885.941162109375"/>
  </node>
  <node id="31326" label="PJJ39560_1" cy:nodeId="1023">
    <graphics x="3899.2890625" z="0.0" y="2778.970703125"/>
  </node>
  <node id="31325" label="WP_078572841_1" cy:nodeId="1024">
    <graphics x="3914.177978515625" z="0.0" y="2858.114013671875"/>
  </node>
  <node id="31324" label="WP_078564093_1" cy:nodeId="1025">
    <graphics x="3788.08447265625" z="0.0" y="2841.455078125"/>
  </node>
  <node id="31323" label="RZU94771_1" cy:nodeId="1026">
    <graphics x="3819.438720703125" z="0.0" y="2770.0283203125"/>
  </node>
  <node id="31322" label="WP_100302786_1" cy:nodeId="1027">
    <graphics x="3845.206298828125" z="0.0" y="2894.55712890625"/>
  </node>
  <node id="31321" label="SDC53518_2" cy:nodeId="1028">
    <graphics x="4044.871826171875" z="0.0" y="2876.423583984375"/>
  </node>
  <node id="31320" label="WP_089404560_3" cy:nodeId="1029">
    <graphics x="4080.51953125" z="0.0" y="2770.0283203125"/>
  </node>
  <node id="31319" label="WP_091365795_2" cy:nodeId="1030">
    <graphics x="4014.177978515625" z="0.0" y="2795.0849609375"/>
  </node>
  <node id="31318" label="WP_073419543_2" cy:nodeId="1031">
    <graphics x="4127.54833984375" z="0.0" y="2871.864501953125"/>
  </node>
  <node id="31317" label="SHF79230_2" cy:nodeId="1032">
    <graphics x="4147.22119140625" z="0.0" y="2784.5068359375"/>
  </node>
  <node id="31316" label="WP_089298084_1" cy:nodeId="1033">
    <graphics x="4410.55224609375" z="0.0" y="2770.0283203125"/>
  </node>
  <node id="31315" label="WP_046567642_1" cy:nodeId="1034">
    <graphics x="4309.9658203125" z="0.0" y="2812.4482421875"/>
  </node>
  <node id="31314" label="PWK29583_1" cy:nodeId="1035">
    <graphics x="4247.22119140625" z="0.0" y="2882.718994140625"/>
  </node>
  <node id="31313" label="WP_093610459_1" cy:nodeId="1036">
    <graphics x="4318.05224609375" z="0.0" y="2942.709228515625"/>
  </node>
  <node id="31312" label="WP_089157775_1" cy:nodeId="1037">
    <graphics x="4378.38427734375" z="0.0" y="2873.80029296875"/>
  </node>
  <node id="31311" label="AKS13949_2" cy:nodeId="1038">
    <graphics x="4577.2705078125" z="0.0" y="2894.46484375"/>
  </node>
  <node id="31310" label="WP_048589183_3" cy:nodeId="1039">
    <graphics x="4510.55224609375" z="0.0" y="2851.23876953125"/>
  </node>
  <node id="31309" label="AIG09585_3" cy:nodeId="1040">
    <graphics x="4637.8291015625" z="0.0" y="2843.01220703125"/>
  </node>
  <node id="31308" label="AKP09252_3" cy:nodeId="1041">
    <graphics x="4530.60107421875" z="0.0" y="2774.716796875"/>
  </node>
  <node id="31307" label="AER69640_3" cy:nodeId="1042">
    <graphics x="4608.4580078125" z="0.0" y="2770.0283203125"/>
  </node>
  <node id="31306" label="WP_081384789_1" cy:nodeId="1043">
    <graphics x="4752.6689453125" z="0.0" y="2886.09765625"/>
  </node>
  <node id="31305" label="OLO48687_1" cy:nodeId="1044">
    <graphics x="4805.240234375" z="0.0" y="2770.0283203125"/>
  </node>
  <node id="31304" label="WP_075410821_9002" cy:nodeId="1045">
    <graphics x="4737.8291015625" z="0.0" y="2809.564208984375"/>
  </node>
  <node id="31303" label="WP_082508744_1" cy:nodeId="1046">
    <graphics x="4832.56201171875" z="0.0" y="2894.7353515625"/>
  </node>
  <node id="31302" label="KQR47999_1" cy:nodeId="1047">
    <graphics x="4864.56689453125" z="0.0" y="2820.90087890625"/>
  </node>
  <node id="31301" label="WP_046085362_4" cy:nodeId="1048">
    <graphics x="5018.65771484375" z="0.0" y="2770.0283203125"/>
  </node>
  <node id="31300" label="WP_078841030_4" cy:nodeId="1049">
    <graphics x="4999.91357421875" z="0.0" y="2895.97802734375"/>
  </node>
  <node id="31299" label="OPF84252_4" cy:nodeId="1050">
    <graphics x="5079.2021484375" z="0.0" y="2882.4716796875"/>
  </node>
  <node id="31298" label="OPF84252_2" cy:nodeId="1051">
    <graphics x="4964.56689453125" z="0.0" y="2826.32080078125"/>
  </node>
  <node id="31297" label="WP_078841030_2" cy:nodeId="1052">
    <graphics x="5089.5771484375" z="0.0" y="2802.65234375"/>
  </node>
  <node id="31296" label="WP_104820017_1" cy:nodeId="1053">
    <graphics x="0.0" z="0.0" y="3304.058837890625"/>
  </node>
  <node id="31295" label="WP_104820017_3" cy:nodeId="1054">
    <graphics x="76.93762969970703" z="0.0" y="3332.842529296875"/>
  </node>
  <node id="31294" label="WP_051778263_1" cy:nodeId="1055">
    <graphics x="127.66265869140625" z="0.0" y="3268.016357421875"/>
  </node>
  <node id="31293" label="WP_057236399_1" cy:nodeId="1056">
    <graphics x="10.627769470214844" z="0.0" y="3228.90625"/>
  </node>
  <node id="31292" label="WP_104820017_2" cy:nodeId="1057">
    <graphics x="82.36280059814453" z="0.0" y="3201.1689453125"/>
  </node>
  <node id="31291" label="WP_049563074_2" cy:nodeId="1058">
    <graphics x="472.9607849121094" z="0.0" y="3250.508544921875"/>
  </node>
  <node id="31290" label="WP_057611617_3" cy:nodeId="1059">
    <graphics x="361.06903076171875" z="0.0" y="3260.22509765625"/>
  </node>
  <node id="31289" label="WP_101404757_2" cy:nodeId="1060">
    <graphics x="288.55462646484375" z="0.0" y="3201.1689453125"/>
  </node>
  <node id="31288" label="WP_028441277_2" cy:nodeId="1061">
    <graphics x="227.66265869140625" z="0.0" y="3269.240478515625"/>
  </node>
  <node id="31287" label="WP_018522479_2" cy:nodeId="1062">
    <graphics x="297.1156005859375" z="0.0" y="3328.48046875"/>
  </node>
  <node id="31286" label="ADD99586_6" cy:nodeId="1063">
    <graphics x="643.3624877929688" z="0.0" y="3201.1689453125"/>
  </node>
  <node id="31285" label="EGR94682_5" cy:nodeId="1064">
    <graphics x="699.0512084960938" z="0.0" y="3257.0595703125"/>
  </node>
  <node id="31284" label="WP_075371528_1" cy:nodeId="1065">
    <graphics x="663.031494140625" z="0.0" y="3327.316650390625"/>
  </node>
  <node id="31283" label="ADD99586_1" cy:nodeId="1066">
    <graphics x="572.9608154296875" z="0.0" y="3237.0185546875"/>
  </node>
  <node id="31282" label="EGR94682_2" cy:nodeId="1067">
    <graphics x="585.2173461914062" z="0.0" y="3314.8349609375"/>
  </node>
  <node id="31281" label="WP_108724550_2" cy:nodeId="1068">
    <graphics x="872.2839965820312" z="0.0" y="3274.47216796875"/>
  </node>
  <node id="31280" label="KPC95547_1" cy:nodeId="1069">
    <graphics x="799.0512084960938" z="0.0" y="3288.861083984375"/>
  </node>
  <node id="31279" label="WP_031027146_2" cy:nodeId="1070">
    <graphics x="857.9271240234375" z="0.0" y="3201.1689453125"/>
  </node>
  <node id="31278" label="WP_107100134_1" cy:nodeId="1071">
    <graphics x="886.6985473632812" z="0.0" y="3347.739013671875"/>
  </node>
  <node id="31277" label="WP_110666035_1" cy:nodeId="1072">
    <graphics x="945.5751953125" z="0.0" y="3260.095947265625"/>
  </node>
  <node id="31276" label="EUA04475_3" cy:nodeId="1073">
    <graphics x="1045.5751953125" z="0.0" y="3245.7646484375"/>
  </node>
  <node id="31275" label="WP_122441228_1" cy:nodeId="1074">
    <graphics x="1172.83203125" z="0.0" y="3247.006591796875"/>
  </node>
  <node id="31274" label="WP_023370892_1" cy:nodeId="1075">
    <graphics x="1147.001708984375" z="0.0" y="3323.257080078125"/>
  </node>
  <node id="31273" label="OOK66964_2" cy:nodeId="1076">
    <graphics x="1066.5765380859375" z="0.0" y="3320.85546875"/>
  </node>
  <node id="31272" label="WP_063469930_2" cy:nodeId="1077">
    <graphics x="1109.7579345703125" z="0.0" y="3201.1689453125"/>
  </node>
  <node id="31271" label="WP_056678071_6" cy:nodeId="1078">
    <graphics x="1492.3277587890625" z="0.0" y="3348.125732421875"/>
  </node>
  <node id="31270" label="WP_055699111_7" cy:nodeId="1079">
    <graphics x="1408.194091796875" z="0.0" y="3201.1689453125"/>
  </node>
  <node id="31269" label="WP_093640559_4" cy:nodeId="1080">
    <graphics x="1384.784423828125" z="0.0" y="3312.172119140625"/>
  </node>
  <node id="31268" label="WP_126382680_3" cy:nodeId="1081">
    <graphics x="1325.630615234375" z="0.0" y="3407.2734375"/>
  </node>
  <node id="31267" label="VEG28624_3" cy:nodeId="1082">
    <graphics x="1272.83203125" z="0.0" y="3315.0361328125"/>
  </node>
  <node id="31266" label="WP_078966254_1" cy:nodeId="1083">
    <graphics x="71.189697265625" z="0.0" y="2843.751708984375"/>
  </node>
  <node id="31265" label="PIF99032_1" cy:nodeId="1084">
    <graphics x="0.0" z="0.0" y="2824.0595703125"/>
  </node>
  <node id="31264" label="WP_128433746_1" cy:nodeId="1085">
    <graphics x="30.377338409423828" z="0.0" y="2906.55615234375"/>
  </node>
  <node id="31263" label="WP_050514186_1" cy:nodeId="1086">
    <graphics x="142.08816528320312" z="0.0" y="2820.0146484375"/>
  </node>
  <node id="31262" label="WP_099938361_1" cy:nodeId="1087">
    <graphics x="116.66815185546875" z="0.0" y="2902.5048828125"/>
  </node>
  <node id="31261" label="WP_050507047_1" cy:nodeId="1088">
    <graphics x="69.85360717773438" z="0.0" y="2770.0283203125"/>
  </node>
  <node id="31260" label="WP_071967420_1" cy:nodeId="1089">
    <graphics x="424.384521484375" z="0.0" y="2851.99609375"/>
  </node>
  <node id="31259" label="WP_017557210_1" cy:nodeId="1090">
    <graphics x="301.30682373046875" z="0.0" y="2810.331298828125"/>
  </node>
  <node id="31258" label="WP_030877129_1" cy:nodeId="1091">
    <graphics x="383.4468994140625" z="0.0" y="2770.0283203125"/>
  </node>
  <node id="31257" label="WP_073700824_1" cy:nodeId="1092">
    <graphics x="340.4208679199219" z="0.0" y="2896.9931640625"/>
  </node>
  <node id="31256" label="WP_089254486_1" cy:nodeId="1093">
    <graphics x="296.4660339355469" z="0.0" y="3004.05712890625"/>
  </node>
  <node id="31255" label="WP_090799956_1" cy:nodeId="1094">
    <graphics x="242.08816528320312" z="0.0" y="3101.1689453125"/>
  </node>
  <node id="31254" label="WP_119286192_1" cy:nodeId="1095">
    <graphics x="585.9122924804688" z="0.0" y="2770.0283203125"/>
  </node>
  <node id="31253" label="WP_091094839_1" cy:nodeId="1096">
    <graphics x="664.7998657226562" z="0.0" y="2809.67822265625"/>
  </node>
  <node id="31252" label="WP_093656413_1" cy:nodeId="1097">
    <graphics x="651.4207153320312" z="0.0" y="2894.29541015625"/>
  </node>
  <node id="31251" label="WP_120688998_1" cy:nodeId="1098">
    <graphics x="524.384521484375" z="0.0" y="2834.31103515625"/>
  </node>
  <node id="31250" label="WP_127935985_6" cy:nodeId="1099">
    <graphics x="567.4150390625" z="0.0" y="2911.3681640625"/>
  </node>
  <node id="31249" label="WP_051709136_1" cy:nodeId="1100">
    <graphics x="597.26904296875" z="0.0" y="2842.487060546875"/>
  </node>
  <node id="31248" label="WP_084436210_1" cy:nodeId="1101">
    <graphics x="975.7595825195312" z="0.0" y="2824.171630859375"/>
  </node>
  <node id="31247" label="WP_028567914_3" cy:nodeId="1102">
    <graphics x="764.7998657226562" z="0.0" y="2847.0068359375"/>
  </node>
  <node id="31246" label="WP_018962008_3" cy:nodeId="1103">
    <graphics x="862.252197265625" z="0.0" y="2794.796875"/>
  </node>
  <node id="31245" label="WP_018962008_2" cy:nodeId="1104">
    <graphics x="872.0751953125" z="0.0" y="2878.6689453125"/>
  </node>
  <node id="31244" label="WP_084692314_1" cy:nodeId="1105">
    <graphics x="958.905029296875" z="0.0" y="2883.1728515625"/>
  </node>
  <node id="31243" label="WP_084692311_3" cy:nodeId="1106">
    <graphics x="946.5440673828125" z="0.0" y="2770.0283203125"/>
  </node>
  <node id="31242" label="WP_093655900_3" cy:nodeId="1107">
    <graphics x="1166.291259765625" z="0.0" y="2770.0283203125"/>
  </node>
  <node id="31241" label="WP_093849541_2" cy:nodeId="1108">
    <graphics x="1167.2515869140625" z="0.0" y="2906.2265625"/>
  </node>
  <node id="31240" label="WP_027743449_1" cy:nodeId="1109">
    <graphics x="1210.8941650390625" z="0.0" y="2835.658203125"/>
  </node>
  <node id="31239" label="WP_124799873_1" cy:nodeId="1110">
    <graphics x="1075.7596435546875" z="0.0" y="2879.354248046875"/>
  </node>
  <node id="31238" label="WP_085014622_3" cy:nodeId="1111">
    <graphics x="1131.4254150390625" z="0.0" y="2841.896484375"/>
  </node>
  <node id="31237" label="WP_093766414_1" cy:nodeId="1112">
    <graphics x="1084.5869140625" z="0.0" y="2784.52294921875"/>
  </node>
  <node id="31236" label="WP_132388264_1" cy:nodeId="1113">
    <graphics x="1365.7578125" z="0.0" y="2770.0283203125"/>
  </node>
  <node id="31235" label="WP_132186409_1" cy:nodeId="1114">
    <graphics x="1329.1717529296875" z="0.0" y="2896.107666015625"/>
  </node>
  <node id="31234" label="WP_132268319_1" cy:nodeId="1115">
    <graphics x="1310.8941650390625" z="0.0" y="2818.691162109375"/>
  </node>
  <node id="31233" label="WP_132268317_1" cy:nodeId="1116">
    <graphics x="1384.10595703125" z="0.0" y="2866.41796875"/>
  </node>
  <node id="31232" label="WP_132186408_1" cy:nodeId="1117">
    <graphics x="1441.8389892578125" z="0.0" y="2883.45263671875"/>
  </node>
  <node id="31231" label="WP_132388266_1" cy:nodeId="1118">
    <graphics x="1435.5562744140625" z="0.0" y="2794.884765625"/>
  </node>
  <node id="31230" label="WP_091247291_1" cy:nodeId="1119">
    <graphics x="1559.158203125" z="0.0" y="2776.90380859375"/>
  </node>
  <node id="31229" label="WP_092807119_1" cy:nodeId="1120">
    <graphics x="1680.333740234375" z="0.0" y="2839.7490234375"/>
  </node>
  <node id="31228" label="SCX58064_1" cy:nodeId="1121">
    <graphics x="1600.6461181640625" z="0.0" y="2838.17333984375"/>
  </node>
  <node id="31227" label="SDG90099_1" cy:nodeId="1122">
    <graphics x="1541.8389892578125" z="0.0" y="2870.49072265625"/>
  </node>
  <node id="31226" label="WP_091553165_1" cy:nodeId="1123">
    <graphics x="1630.114990234375" z="0.0" y="2906.18115234375"/>
  </node>
  <node id="31225" label="WP_091067169_1" cy:nodeId="1124">
    <graphics x="1641.9822998046875" z="0.0" y="2770.0283203125"/>
  </node>
  <node id="31224" label="WP_133437797_1" cy:nodeId="1125">
    <graphics x="1892.7418212890625" z="0.0" y="2770.0283203125"/>
  </node>
  <node id="31223" label="WP_055578070_3" cy:nodeId="1126">
    <graphics x="1805.118408203125" z="0.0" y="2772.30126953125"/>
  </node>
  <node id="31222" label="WP_083271029_2" cy:nodeId="1127">
    <graphics x="1849.8284912109375" z="0.0" y="2831.246826171875"/>
  </node>
  <node id="31221" label="RUP01435_2" cy:nodeId="1128">
    <graphics x="1780.333740234375" z="0.0" y="2857.260009765625"/>
  </node>
  <node id="31220" label="WP_085249702_2" cy:nodeId="1129">
    <graphics x="1853.787109375" z="0.0" y="2905.765380859375"/>
  </node>
  <node id="31219" label="ODR23958_2" cy:nodeId="1130">
    <graphics x="1921.1494140625" z="0.0" y="2851.5419921875"/>
  </node>
  <node id="31218" label="WP_091030566_2" cy:nodeId="1131">
    <graphics x="2021.1494140625" z="0.0" y="2770.0283203125"/>
  </node>
  <node id="31217" label="SCL44965_3" cy:nodeId="1132">
    <graphics x="2122.582763671875" z="0.0" y="2822.973388671875"/>
  </node>
  <node id="31216" label="SCL44965_2" cy:nodeId="1133">
    <graphics x="2214.743408203125" z="0.0" y="2915.1728515625"/>
  </node>
  <node id="31215" label="WP_131761782_2" cy:nodeId="1134">
    <graphics x="2250.891845703125" z="0.0" y="2845.807861328125"/>
  </node>
  <node id="31214" label="WP_014176997_1" cy:nodeId="1135">
    <graphics x="2196.816162109375" z="0.0" y="2790.1337890625"/>
  </node>
  <node id="31213" label="WP_091094891_1" cy:nodeId="1136">
    <graphics x="2138.06494140625" z="0.0" y="2902.717041015625"/>
  </node>
  <node id="31212" label="WP_026413549_9004" cy:nodeId="1137">
    <graphics x="2448.44140625" z="0.0" y="2770.0283203125"/>
  </node>
  <node id="31211" label="WP_127935985_5" cy:nodeId="1138">
    <graphics x="2430.37646484375" z="0.0" y="2906.682373046875"/>
  </node>
  <node id="31210" label="WP_120688998_9002" cy:nodeId="1139">
    <graphics x="2484.705078125" z="0.0" y="2846.596435546875"/>
  </node>
  <node id="31209" label="AEM00621_9001" cy:nodeId="1140">
    <graphics x="2350.891845703125" z="0.0" y="2878.11669921875"/>
  </node>
  <node id="31208" label="WP_061921822_9003" cy:nodeId="1141">
    <graphics x="2408.51904296875" z="0.0" y="2831.886474609375"/>
  </node>
  <node id="31207" label="WP_091094839_9004" cy:nodeId="1142">
    <graphics x="2356.740234375" z="0.0" y="2785.4853515625"/>
  </node>
  <node id="31206" label="WP_027743449_6" cy:nodeId="1143">
    <graphics x="2718.137451171875" z="0.0" y="2952.10888671875"/>
  </node>
  <node id="31205" label="WP_085014622_5" cy:nodeId="1144">
    <graphics x="2723.140625" z="0.0" y="2834.46484375"/>
  </node>
  <node id="31204" label="WP_117228579_2" cy:nodeId="1145">
    <graphics x="2584.705078125" z="0.0" y="2813.291259765625"/>
  </node>
  <node id="31203" label="WP_035849420_6" cy:nodeId="1146">
    <graphics x="2669.6591796875" z="0.0" y="2872.737548828125"/>
  </node>
  <node id="31202" label="WP_109186559_2" cy:nodeId="1147">
    <graphics x="2611.1962890625" z="0.0" y="2902.4931640625"/>
  </node>
  <node id="31201" label="WP_117228578_2" cy:nodeId="1148">
    <graphics x="2656.1865234375" z="0.0" y="2770.0283203125"/>
  </node>
  <node id="31200" label="WP_049804670_1" cy:nodeId="1149">
    <graphics x="2569.0771484375" z="0.0" y="2374.017822265625"/>
  </node>
  <node id="31199" label="WP_117228578_1" cy:nodeId="1150">
    <graphics x="2677.800048828125" z="0.0" y="2442.218017578125"/>
  </node>
  <node id="31198" label="WP_117228580_1" cy:nodeId="1151">
    <graphics x="2638.76171875" z="0.0" y="2505.003662109375"/>
  </node>
  <node id="31197" label="WP_013865884_1" cy:nodeId="1152">
    <graphics x="2643.079833984375" z="0.0" y="2376.7548828125"/>
  </node>
  <node id="31196" label="WP_117228579_1" cy:nodeId="1153">
    <graphics x="2529.30517578125" z="0.0" y="2436.9326171875"/>
  </node>
  <node id="31195" label="BAK38069_1" cy:nodeId="1154">
    <graphics x="2564.36865234375" z="0.0" y="2502.801513671875"/>
  </node>
  <node id="31194" label="WP_013865882_1" cy:nodeId="1155">
    <graphics x="2603.33056640625" z="0.0" y="2439.8017578125"/>
  </node>
  <node id="31193" label="WP_076824657_2" cy:nodeId="1156">
    <graphics x="2995.38232421875" z="0.0" y="2379.363525390625"/>
  </node>
  <node id="31192" label="WP_124003201_2" cy:nodeId="1157">
    <graphics x="2827.29150390625" z="0.0" y="2503.550048828125"/>
  </node>
  <node id="31191" label="WP_091272829_3" cy:nodeId="1158">
    <graphics x="2903.963134765625" z="0.0" y="2470.214599609375"/>
  </node>
  <node id="31190" label="WP_131626375_3" cy:nodeId="1159">
    <graphics x="3001.945556640625" z="0.0" y="2477.311767578125"/>
  </node>
  <node id="31189" label="WP_091272827_3" cy:nodeId="1160">
    <graphics x="2899.595703125" z="0.0" y="2400.7333984375"/>
  </node>
  <node id="31188" label="RPE52214_2" cy:nodeId="1161">
    <graphics x="2777.800048828125" z="0.0" y="2440.776611328125"/>
  </node>
  <node id="31187" label="WP_124003633_2" cy:nodeId="1162">
    <graphics x="2821.379150390625" z="0.0" y="2374.017822265625"/>
  </node>
  <node id="31186" label="WP_103517755_2" cy:nodeId="1163">
    <graphics x="3236.70849609375" z="0.0" y="2457.875732421875"/>
  </node>
  <node id="31185" label="WP_051386825_1" cy:nodeId="1164">
    <graphics x="3115.291748046875" z="0.0" y="2400.803466796875"/>
  </node>
  <node id="31184" label="WP_054222272_1" cy:nodeId="1165">
    <graphics x="3168.766845703125" z="0.0" y="2374.017822265625"/>
  </node>
  <node id="31183" label="WP_115914639_1" cy:nodeId="1166">
    <graphics x="3101.945556640625" z="0.0" y="2459.217041015625"/>
  </node>
  <node id="31182" label="WP_071377378_1" cy:nodeId="1167">
    <graphics x="3199.880859375" z="0.0" y="2505.07666015625"/>
  </node>
  <node id="31181" label="WP_084415984_2" cy:nodeId="1168">
    <graphics x="3139.946533203125" z="0.0" y="2505.434814453125"/>
  </node>
  <node id="31180" label="WP_018550650_1" cy:nodeId="1169">
    <graphics x="3222.65771484375" z="0.0" y="2399.603515625"/>
  </node>
  <node id="31179" label="WP_004004118_2" cy:nodeId="1170">
    <graphics x="3460.31005859375" z="0.0" y="2494.19140625"/>
  </node>
  <node id="31178" label="WP_035849420_5" cy:nodeId="1171">
    <graphics x="3396.263916015625" z="0.0" y="2521.19970703125"/>
  </node>
  <node id="31177" label="WP_035849418_3" cy:nodeId="1172">
    <graphics x="3404.29541015625" z="0.0" y="2444.718994140625"/>
  </node>
  <node id="31176" label="WP_084011357_4" cy:nodeId="1173">
    <graphics x="3339.84521484375" z="0.0" y="2409.47119140625"/>
  </node>
  <node id="31175" label="WP_045877303_4" cy:nodeId="1174">
    <graphics x="3336.70849609375" z="0.0" y="2481.801513671875"/>
  </node>
  <node id="31174" label="WP_067284698_2" cy:nodeId="1175">
    <graphics x="3471.807861328125" z="0.0" y="2419.24755859375"/>
  </node>
  <node id="31173" label="WP_104263679_2" cy:nodeId="1176">
    <graphics x="3408.58056640625" z="0.0" y="2374.017822265625"/>
  </node>
  <node id="31172" label="WP_015618321_1" cy:nodeId="1177">
    <graphics x="3803.39892578125" z="0.0" y="2409.468994140625"/>
  </node>
  <node id="31171" label="WP_057576508_3" cy:nodeId="1178">
    <graphics x="3659.752685546875" z="0.0" y="2559.95654296875"/>
  </node>
  <node id="31170" label="WP_078909294_7" cy:nodeId="1179">
    <graphics x="3590.4716796875" z="0.0" y="2453.482177734375"/>
  </node>
  <node id="31169" label="WP_031012255_1" cy:nodeId="1180">
    <graphics x="3571.807861328125" z="0.0" y="2541.439697265625"/>
  </node>
  <node id="31168" label="SDN00667_2" cy:nodeId="1181">
    <graphics x="3791.92724609375" z="0.0" y="2483.82861328125"/>
  </node>
  <node id="31167" label="WP_107442966_5" cy:nodeId="1182">
    <graphics x="3688.6455078125" z="0.0" y="2467.161865234375"/>
  </node>
  <node id="31166" label="WP_090014707_2" cy:nodeId="1183">
    <graphics x="3736.8095703125" z="0.0" y="2374.017822265625"/>
  </node>
  <node id="31165" label="SEC38602_2" cy:nodeId="1184">
    <graphics x="3996.809326171875" z="0.0" y="2573.216552734375"/>
  </node>
  <node id="31164" label="WP_086824496_1" cy:nodeId="1185">
    <graphics x="3917.258544921875" z="0.0" y="2374.017822265625"/>
  </node>
  <node id="31163" label="WP_121394015_1" cy:nodeId="1186">
    <graphics x="3997.311767578125" z="0.0" y="2476.2216796875"/>
  </node>
  <node id="31162" label="WP_125813086_2" cy:nodeId="1187">
    <graphics x="3942.185791015625" z="0.0" y="2670.0283203125"/>
  </node>
  <node id="31161" label="WP_126898321_2" cy:nodeId="1188">
    <graphics x="3903.39892578125" z="0.0" y="2566.0302734375"/>
  </node>
  <node id="31160" label="WP_092779820_1" cy:nodeId="1189">
    <graphics x="3917.918212890625" z="0.0" y="2469.955322265625"/>
  </node>
  <node id="31159" label="WP_030432198_1" cy:nodeId="1190">
    <graphics x="4012.712646484375" z="0.0" y="2381.387939453125"/>
  </node>
  <node id="31158" label="WP_089157775_2" cy:nodeId="1191">
    <graphics x="4195.9248046875" z="0.0" y="2374.017822265625"/>
  </node>
  <node id="31157" label="WP_067306280_1" cy:nodeId="1192">
    <graphics x="4140.19189453125" z="0.0" y="2495.25390625"/>
  </node>
  <node id="31156" label="WP_088972034_1" cy:nodeId="1193">
    <graphics x="4112.712890625" z="0.0" y="2442.627685546875"/>
  </node>
  <node id="31155" label="WP_088988891_1" cy:nodeId="1194">
    <graphics x="4198.068359375" z="0.0" y="2509.52001953125"/>
  </node>
  <node id="31154" label="WP_120728438_1" cy:nodeId="1195">
    <graphics x="4244.90771484375" z="0.0" y="2470.534423828125"/>
  </node>
  <node id="31153" label="WP_046567642_2" cy:nodeId="1196">
    <graphics x="4242.7177734375" z="0.0" y="2410.8857421875"/>
  </node>
  <node id="31152" label="WP_088948967_1" cy:nodeId="1197">
    <graphics x="4137.76025390625" z="0.0" y="2388.549560546875"/>
  </node>
  <node id="31151" label="WP_114055833_1" cy:nodeId="1198">
    <graphics x="4490.8203125" z="0.0" y="2428.7568359375"/>
  </node>
  <node id="31150" label="WP_086845754_2" cy:nodeId="1199">
    <graphics x="4466.63330078125" z="0.0" y="2500.763671875"/>
  </node>
  <node id="31149" label="TDU80263_1" cy:nodeId="1200">
    <graphics x="4391.5029296875" z="0.0" y="2514.1689453125"/>
  </node>
  <node id="31148" label="WP_125541988_1" cy:nodeId="1201">
    <graphics x="4369.92236328125" z="0.0" y="2388.69580078125"/>
  </node>
  <node id="31147" label="WP_103491678_3" cy:nodeId="1202">
    <graphics x="4439.919921875" z="0.0" y="2374.017822265625"/>
  </node>
  <node id="31146" label="WP_053787331_1" cy:nodeId="1203">
    <graphics x="4344.90771484375" z="0.0" y="2455.724609375"/>
  </node>
  <node id="31145" label="WP_030633187_2" cy:nodeId="1204">
    <graphics x="4419.3310546875" z="0.0" y="2446.399169921875"/>
  </node>
  <node id="31144" label="WP_078564093_2" cy:nodeId="1205">
    <graphics x="4701.71337890625" z="0.0" y="2374.017822265625"/>
  </node>
  <node id="31143" label="WP_078572841_2" cy:nodeId="1206">
    <graphics x="4628.5712890625" z="0.0" y="2503.108642578125"/>
  </node>
  <node id="31142" label="PJJ39560_2" cy:nodeId="1207">
    <graphics x="4590.8203125" z="0.0" y="2439.312744140625"/>
  </node>
  <node id="31141" label="WP_100302786_2" cy:nodeId="1208">
    <graphics x="4739.1728515625" z="0.0" y="2437.849365234375"/>
  </node>
  <node id="31140" label="WP_052770273_1" cy:nodeId="1209">
    <graphics x="4627.35595703125" z="0.0" y="2374.62841796875"/>
  </node>
  <node id="31139" label="AKH86621_1" cy:nodeId="1210">
    <graphics x="4702.5791015625" z="0.0" y="2502.546630859375"/>
  </node>
  <node id="31138" label="RZU94771_2" cy:nodeId="1211">
    <graphics x="4664.95166015625" z="0.0" y="2438.8125"/>
  </node>
  <node id="31137" label="ACZ89043_1" cy:nodeId="1212">
    <graphics x="4958.3857421875" z="0.0" y="2499.406982421875"/>
  </node>
  <node id="31136" label="WP_086572205_1" cy:nodeId="1213">
    <graphics x="4839.1728515625" z="0.0" y="2449.612060546875"/>
  </node>
  <node id="31135" label="KLO64220_1" cy:nodeId="1214">
    <graphics x="4944.7080078125" z="0.0" y="2374.017822265625"/>
  </node>
  <node id="31134" label="WP_081937495_1" cy:nodeId="1215">
    <graphics x="4887.8076171875" z="0.0" y="2509.071533203125"/>
  </node>
  <node id="31133" label="SFI84698_1" cy:nodeId="1216">
    <graphics x="4987.34765625" z="0.0" y="2433.765869140625"/>
  </node>
  <node id="31132" label="WP_081453250_1" cy:nodeId="1217">
    <graphics x="4870.30517578125" z="0.0" y="2379.848876953125"/>
  </node>
  <node id="31131" label="WP_093886633_1" cy:nodeId="1218">
    <graphics x="4910.52978515625" z="0.0" y="2441.064453125"/>
  </node>
  <node id="31130" label="OMO45941_3" cy:nodeId="1219">
    <graphics x="5217.0185546875" z="0.0" y="2413.1669921875"/>
  </node>
  <node id="31129" label="WP_088264775_2" cy:nodeId="1220">
    <graphics x="5087.4326171875" z="0.0" y="2411.23486328125"/>
  </node>
  <node id="31128" label="PKB45316_2" cy:nodeId="1221">
    <graphics x="5150.8984375" z="0.0" y="2447.2119140625"/>
  </node>
  <node id="31127" label="WP_053587900_2" cy:nodeId="1222">
    <graphics x="5213.79150390625" z="0.0" y="2486.755859375"/>
  </node>
  <node id="31126" label="WP_088261769_1" cy:nodeId="1223">
    <graphics x="5151.0068359375" z="0.0" y="2521.50244140625"/>
  </node>
  <node id="31125" label="WP_100886407_2" cy:nodeId="1224">
    <graphics x="5153.0322265625" z="0.0" y="2374.017822265625"/>
  </node>
  <node id="31124" label="WP_088246551_2" cy:nodeId="1225">
    <graphics x="5087.34765625" z="0.0" y="2485.40869140625"/>
  </node>
  <node id="31123" label="WP_053729790_2" cy:nodeId="1226">
    <graphics x="1160.5584716796875" z="0.0" y="2536.29833984375"/>
  </node>
  <node id="31122" label="WP_100584684_1" cy:nodeId="1227">
    <graphics x="1221.01611328125" z="0.0" y="2377.20166015625"/>
  </node>
  <node id="31121" label="WP_053729792_2" cy:nodeId="1228">
    <graphics x="1242.465576171875" z="0.0" y="2601.68603515625"/>
  </node>
  <node id="31120" label="RPF24868_2" cy:nodeId="1229">
    <graphics x="1339.4107666015625" z="0.0" y="2374.017822265625"/>
  </node>
  <node id="31119" label="WP_100886407_1" cy:nodeId="1230">
    <graphics x="1405.9764404296875" z="0.0" y="2441.7890625"/>
  </node>
  <node id="31118" label="PKB45316_1" cy:nodeId="1231">
    <graphics x="1360.431884765625" z="0.0" y="2512.268310546875"/>
  </node>
  <node id="31117" label="AKJ15899_3" cy:nodeId="1232">
    <graphics x="1268.2171630859375" z="0.0" y="2487.444091796875"/>
  </node>
  <node id="31116" label="WP_123971014_2" cy:nodeId="1233">
    <graphics x="1303.0621337890625" z="0.0" y="2428.310546875"/>
  </node>
  <node id="31115" label="WP_085014622_4" cy:nodeId="1234">
    <graphics x="1566.984130859375" z="0.0" y="2517.876953125"/>
  </node>
  <node id="31114" label="WP_093766414_3" cy:nodeId="1235">
    <graphics x="1512.151611328125" z="0.0" y="2483.650634765625"/>
  </node>
  <node id="31113" label="WP_093655900_4" cy:nodeId="1236">
    <graphics x="1625.89013671875" z="0.0" y="2497.337890625"/>
  </node>
  <node id="31112" label="WP_027743449_3" cy:nodeId="1237">
    <graphics x="1574.449462890625" z="0.0" y="2443.50146484375"/>
  </node>
  <node id="31111" label="WP_064110435_5" cy:nodeId="1238">
    <graphics x="1617.509033203125" z="0.0" y="2383.258544921875"/>
  </node>
  <node id="31110" label="WP_090039557_5" cy:nodeId="1239">
    <graphics x="1505.9764404296875" z="0.0" y="2418.8974609375"/>
  </node>
  <node id="31109" label="WP_085014620_3" cy:nodeId="1240">
    <graphics x="1649.107421875" z="0.0" y="2439.552734375"/>
  </node>
  <node id="31108" label="WP_093849541_3" cy:nodeId="1241">
    <graphics x="1553.08740234375" z="0.0" y="2374.017822265625"/>
  </node>
  <node id="31107" label="WP_131785729_1" cy:nodeId="1242">
    <graphics x="1749.107421875" z="0.0" y="2451.206787109375"/>
  </node>
  <node id="31106" label="WP_004004118_1" cy:nodeId="1243">
    <graphics x="1836.3953857421875" z="0.0" y="2374.017822265625"/>
  </node>
  <node id="31105" label="WP_035849420_4" cy:nodeId="1244">
    <graphics x="1773.9310302734375" z="0.0" y="2391.4189453125"/>
  </node>
  <node id="31104" label="WP_035849418_2" cy:nodeId="1245">
    <graphics x="1780.383544921875" z="0.0" y="2507.818115234375"/>
  </node>
  <node id="31103" label="WP_045877303_2" cy:nodeId="1246">
    <graphics x="1843.7838134765625" z="0.0" y="2517.74072265625"/>
  </node>
  <node id="31102" label="WP_131785730_1" cy:nodeId="1247">
    <graphics x="1823.1260986328125" z="0.0" y="2446.5146484375"/>
  </node>
  <node id="31101" label="WP_084011357_2" cy:nodeId="1248">
    <graphics x="1888.368408203125" z="0.0" y="2411.71923828125"/>
  </node>
  <node id="31100" label="WP_067284698_1" cy:nodeId="1249">
    <graphics x="1891.1405029296875" z="0.0" y="2475.707275390625"/>
  </node>
  <node id="31099" label="WP_061787443_2" cy:nodeId="1250">
    <graphics x="2152.302001953125" z="0.0" y="2374.017822265625"/>
  </node>
  <node id="31098" label="WP_089950617_1" cy:nodeId="1251">
    <graphics x="2186.74560546875" z="0.0" y="2544.948974609375"/>
  </node>
  <node id="31097" label="WP_066215709_1" cy:nodeId="1252">
    <graphics x="2140.016845703125" z="0.0" y="2472.346923828125"/>
  </node>
  <node id="31096" label="WP_109280137_1" cy:nodeId="1253">
    <graphics x="2043.920166015625" z="0.0" y="2408.23779296875"/>
  </node>
  <node id="31095" label="WP_052852666_1" cy:nodeId="1254">
    <graphics x="2055.9658203125" z="0.0" y="2547.75048828125"/>
  </node>
  <node id="31094" label="WP_109280200_1" cy:nodeId="1255">
    <graphics x="1991.1405029296875" z="0.0" y="2482.413818359375"/>
  </node>
  <node id="31093" label="SEQ53933_1" cy:nodeId="1256">
    <graphics x="2122.67431640625" z="0.0" y="2599.816162109375"/>
  </node>
  <node id="31092" label="SEC29390_1" cy:nodeId="1257">
    <graphics x="2086.252197265625" z="0.0" y="2483.040283203125"/>
  </node>
  <node id="31091" label="BAG17422_1" cy:nodeId="1258">
    <graphics x="2308.68701171875" z="0.0" y="2394.421142578125"/>
  </node>
  <node id="31090" label="WP_055559179_2" cy:nodeId="1259">
    <graphics x="2286.74560546875" z="0.0" y="2455.394287109375"/>
  </node>
  <node id="31089" label="WP_106731546_1" cy:nodeId="1260">
    <graphics x="2429.30517578125" z="0.0" y="2473.1953125"/>
  </node>
  <node id="31088" label="KOG82578_4" cy:nodeId="1261">
    <graphics x="2370.1201171875" z="0.0" y="2374.017822265625"/>
  </node>
  <node id="31087" label="SDE31545_2" cy:nodeId="1262">
    <graphics x="2320.369873046875" z="0.0" y="2510.00537109375"/>
  </node>
  <node id="31086" label="KOU46944_3" cy:nodeId="1263">
    <graphics x="2359.697509765625" z="0.0" y="2447.12255859375"/>
  </node>
  <node id="31085" label="WP_083191919_3" cy:nodeId="1264">
    <graphics x="2423.711669921875" z="0.0" y="2409.173828125"/>
  </node>
  <node id="31084" label="WP_052295615_1" cy:nodeId="1265">
    <graphics x="2383.986328125" z="0.0" y="2517.38232421875"/>
  </node>
  <node id="31083" label="WP_090047429_4" cy:nodeId="1266">
    <graphics x="3935.110107421875" z="0.0" y="2003.6591796875"/>
  </node>
  <node id="31082" label="WP_089952439_2" cy:nodeId="1267">
    <graphics x="3905.833740234375" z="0.0" y="2105.76708984375"/>
  </node>
  <node id="31081" label="SER15522_2" cy:nodeId="1268">
    <graphics x="4006.29833984375" z="0.0" y="2132.4404296875"/>
  </node>
  <node id="31080" label="WP_109636347_1" cy:nodeId="1269">
    <graphics x="3992.220703125" z="0.0" y="1997.7611083984375"/>
  </node>
  <node id="31079" label="PWK88358_1" cy:nodeId="1270">
    <graphics x="3969.1669921875" z="0.0" y="2067.54052734375"/>
  </node>
  <node id="31078" label="SMC91639_2" cy:nodeId="1271">
    <graphics x="3951.446044921875" z="0.0" y="2140.066650390625"/>
  </node>
  <node id="31077" label="WP_090064781_1" cy:nodeId="1272">
    <graphics x="4040.415771484375" z="0.0" y="2089.853515625"/>
  </node>
  <node id="31076" label="WP_093590338_1" cy:nodeId="1273">
    <graphics x="3899.11669921875" z="0.0" y="2048.224365234375"/>
  </node>
  <node id="31075" label="WP_090003614_1" cy:nodeId="1274">
    <graphics x="4035.51171875" z="0.0" y="2034.554931640625"/>
  </node>
  <node id="31074" label="WP_073785992_4" cy:nodeId="1275">
    <graphics x="4326.11376953125" z="0.0" y="2207.919189453125"/>
  </node>
  <node id="31073" label="WP_121006702_1" cy:nodeId="1276">
    <graphics x="4197.62158203125" z="0.0" y="1997.7611083984375"/>
  </node>
  <node id="31072" label="EIF94124_2" cy:nodeId="1277">
    <graphics x="4267.7265625" z="0.0" y="2070.9375"/>
  </node>
  <node id="31071" label="KJY27974_1" cy:nodeId="1278">
    <graphics x="4251.40380859375" z="0.0" y="2194.875"/>
  </node>
  <node id="31070" label="KOV37396_2" cy:nodeId="1279">
    <graphics x="4302.9697265625" z="0.0" y="2141.207763671875"/>
  </node>
  <node id="31069" label="OKH95170_4" cy:nodeId="1280">
    <graphics x="4344.17236328125" z="0.0" y="2078.377197265625"/>
  </node>
  <node id="31068" label="WP_051771079_1" cy:nodeId="1281">
    <graphics x="4373.4658203125" z="0.0" y="2147.083251953125"/>
  </node>
  <node id="31067" label="WP_078902009_1" cy:nodeId="1282">
    <graphics x="4227.169921875" z="0.0" y="2121.531494140625"/>
  </node>
  <node id="31066" label="WP_062703680_1" cy:nodeId="1283">
    <graphics x="4140.416015625" z="0.0" y="2067.472412109375"/>
  </node>
  <node id="31065" label="WP_030462613_2" cy:nodeId="1284">
    <graphics x="4670.75" z="0.0" y="2211.956298828125"/>
  </node>
  <node id="31064" label="WP_037881970_3" cy:nodeId="1285">
    <graphics x="4721.11572265625" z="0.0" y="2101.552978515625"/>
  </node>
  <node id="31063" label="WP_088799351_2" cy:nodeId="1286">
    <graphics x="4524.1064453125" z="0.0" y="1997.7611083984375"/>
  </node>
  <node id="31062" label="WP_088799362_4" cy:nodeId="1287">
    <graphics x="4473.4658203125" z="0.0" y="2089.856689453125"/>
  </node>
  <node id="31061" label="WP_088799362_3" cy:nodeId="1288">
    <graphics x="4726.2197265625" z="0.0" y="2167.59228515625"/>
  </node>
  <node id="31060" label="WP_067603246_1" cy:nodeId="1289">
    <graphics x="4590.98974609375" z="0.0" y="2096.455810546875"/>
  </node>
  <node id="31059" label="WP_053747924_3" cy:nodeId="1290">
    <graphics x="4598.919921875" z="0.0" y="2183.880615234375"/>
  </node>
  <node id="31058" label="WP_111415595_4" cy:nodeId="1291">
    <graphics x="4662.9560546875" z="0.0" y="2066.470458984375"/>
  </node>
  <node id="31057" label="WP_030040480_4" cy:nodeId="1292">
    <graphics x="4645.7890625" z="0.0" y="2140.027099609375"/>
  </node>
  <node id="31056" label="WP_063471945_1" cy:nodeId="1293">
    <graphics x="4969.44140625" z="0.0" y="2086.9091796875"/>
  </node>
  <node id="31055" label="WP_085252934_1" cy:nodeId="1294">
    <graphics x="4916.82177734375" z="0.0" y="1997.7611083984375"/>
  </node>
  <node id="31054" label="EUA05503_1" cy:nodeId="1295">
    <graphics x="4883.14892578125" z="0.0" y="2141.66943359375"/>
  </node>
  <node id="31053" label="WP_085105271_1" cy:nodeId="1296">
    <graphics x="4826.2197265625" z="0.0" y="2053.048828125"/>
  </node>
  <node id="31052" label="WP_085671318_1" cy:nodeId="1297">
    <graphics x="4962.123046875" z="0.0" y="2032.19580078125"/>
  </node>
  <node id="31051" label="WP_122530149_1" cy:nodeId="1298">
    <graphics x="4896.9853515625" z="0.0" y="2068.514404296875"/>
  </node>
  <node id="31050" label="WP_083102943_1" cy:nodeId="1299">
    <graphics x="4937.42431640625" z="0.0" y="2131.3515625"/>
  </node>
  <node id="31049" label="OOK83994_1" cy:nodeId="1300">
    <graphics x="4859.865234375" z="0.0" y="2006.311767578125"/>
  </node>
  <node id="31048" label="WP_083115648_1" cy:nodeId="1301">
    <graphics x="4835.84326171875" z="0.0" y="2109.511474609375"/>
  </node>
  <node id="31047" label="WP_085014622_2" cy:nodeId="1302">
    <graphics x="5080.8984375" z="0.0" y="2113.7373046875"/>
  </node>
  <node id="31046" label="WP_085014620_2" cy:nodeId="1303">
    <graphics x="5121.52490234375" z="0.0" y="1997.7611083984375"/>
  </node>
  <node id="31045" label="WP_027743449_5" cy:nodeId="1304">
    <graphics x="5127.69873046875" z="0.0" y="2052.56591796875"/>
  </node>
  <node id="31044" label="WP_093655900_6" cy:nodeId="1305">
    <graphics x="5185.12353515625" z="0.0" y="2011.0535888671875"/>
  </node>
  <node id="31043" label="WP_093766414_5" cy:nodeId="1306">
    <graphics x="5069.44140625" z="0.0" y="2051.52197265625"/>
  </node>
  <node id="31042" label="WP_093849541_6" cy:nodeId="1307">
    <graphics x="5217.6884765625" z="0.0" y="2061.560302734375"/>
  </node>
  <node id="31041" label="WP_064110435_4" cy:nodeId="1308">
    <graphics x="5156.60888671875" z="0.0" y="2100.364501953125"/>
  </node>
  <node id="31040" label="WP_090039557_4" cy:nodeId="1309">
    <graphics x="5205.27099609375" z="0.0" y="2125.65380859375"/>
  </node>
  <node id="31039" label="WP_035849420_3" cy:nodeId="1310">
    <graphics x="5133.76904296875" z="0.0" y="2152.69775390625"/>
  </node>
  <node id="31038" label="WP_090039557_1" cy:nodeId="1311">
    <graphics x="100.72076416015625" z="0.0" y="2374.017822265625"/>
  </node>
  <node id="31037" label="WP_085014620_5" cy:nodeId="1312">
    <graphics x="151.78106689453125" z="0.0" y="2411.409912109375"/>
  </node>
  <node id="31036" label="WP_093655900_2" cy:nodeId="1313">
    <graphics x="0.0" z="0.0" y="2441.21728515625"/>
  </node>
  <node id="31035" label="WP_035849420_2" cy:nodeId="1314">
    <graphics x="152.35845947265625" z="0.0" y="2480.918212890625"/>
  </node>
  <node id="31034" label="WP_027743449_2" cy:nodeId="1315">
    <graphics x="101.59713745117188" z="0.0" y="2518.9013671875"/>
  </node>
  <node id="31033" label="WP_093849541_1" cy:nodeId="1316">
    <graphics x="101.78897094726562" z="0.0" y="2444.65625"/>
  </node>
  <node id="31032" label="WP_085014622_7" cy:nodeId="1317">
    <graphics x="48.299407958984375" z="0.0" y="2454.236328125"/>
  </node>
  <node id="31031" label="WP_093766414_2" cy:nodeId="1318">
    <graphics x="40.95001220703125" z="0.0" y="2383.50048828125"/>
  </node>
  <node id="31030" label="WP_064110435_1" cy:nodeId="1319">
    <graphics x="39.10107421875" z="0.0" y="2512.46435546875"/>
  </node>
  <node id="31029" label="KZC95159_1" cy:nodeId="1320">
    <graphics x="393.412353515625" z="0.0" y="2466.791259765625"/>
  </node>
  <node id="31028" label="WP_086515725_1" cy:nodeId="1321">
    <graphics x="287.09844970703125" z="0.0" y="2381.078125"/>
  </node>
  <node id="31027" label="WP_104343881_1" cy:nodeId="1322">
    <graphics x="356.1556091308594" z="0.0" y="2511.756591796875"/>
  </node>
  <node id="31026" label="WP_043668521_1" cy:nodeId="1323">
    <graphics x="326.4181823730469" z="0.0" y="2448.9638671875"/>
  </node>
  <node id="31025" label="WP_086517141_1" cy:nodeId="1324">
    <graphics x="386.4890441894531" z="0.0" y="2408.689453125"/>
  </node>
  <node id="31024" label="OUE10317_1" cy:nodeId="1325">
    <graphics x="255.07565307617188" z="0.0" y="2476.486083984375"/>
  </node>
  <node id="31023" label="WP_053775823_1" cy:nodeId="1326">
    <graphics x="252.35845947265625" z="0.0" y="2422.47314453125"/>
  </node>
  <node id="31022" label="AWF97203_1" cy:nodeId="1327">
    <graphics x="340.47833251953125" z="0.0" y="2374.017822265625"/>
  </node>
  <node id="31021" label="OUE24647_1" cy:nodeId="1328">
    <graphics x="297.8475341796875" z="0.0" y="2515.76513671875"/>
  </node>
  <node id="31020" label="WP_037862255_3" cy:nodeId="1329">
    <graphics x="636.1351928710938" z="0.0" y="2374.017822265625"/>
  </node>
  <node id="31019" label="WP_055482843_1" cy:nodeId="1330">
    <graphics x="677.6723022460938" z="0.0" y="2589.0576171875"/>
  </node>
  <node id="31018" label="WP_063758854_2" cy:nodeId="1331">
    <graphics x="558.7625732421875" z="0.0" y="2440.649658203125"/>
  </node>
  <node id="31017" label="WP_063832391_1" cy:nodeId="1332">
    <graphics x="747.1759033203125" z="0.0" y="2397.644287109375"/>
  </node>
  <node id="31016" label="WP_055553439_2" cy:nodeId="1333">
    <graphics x="667.6333618164062" z="0.0" y="2489.7529296875"/>
  </node>
  <node id="31015" label="AKJ13608_4" cy:nodeId="1334">
    <graphics x="766.078369140625" z="0.0" y="2591.95751953125"/>
  </node>
  <node id="31014" label="KIE24863_5" cy:nodeId="1335">
    <graphics x="769.699951171875" z="0.0" y="2503.369140625"/>
  </node>
  <node id="31013" label="WP_051458184_1" cy:nodeId="1336">
    <graphics x="574.6307373046875" z="0.0" y="2574.55908203125"/>
  </node>
  <node id="31012" label="WP_004018421_2" cy:nodeId="1337">
    <graphics x="493.412353515625" z="0.0" y="2655.908447265625"/>
  </node>
  <node id="31011" label="WP_037881970_2" cy:nodeId="1338">
    <graphics x="1038.084716796875" z="0.0" y="2387.092529296875"/>
  </node>
  <node id="31010" label="WP_067603246_2" cy:nodeId="1339">
    <graphics x="1060.5584716796875" z="0.0" y="2452.433837890625"/>
  </node>
  <node id="31009" label="WP_030040480_2" cy:nodeId="1340">
    <graphics x="913.4078979492188" z="0.0" y="2405.7041015625"/>
  </node>
  <node id="31008" label="WP_030462613_1" cy:nodeId="1341">
    <graphics x="1014.2703857421875" z="0.0" y="2495.4130859375"/>
  </node>
  <node id="31007" label="WP_088799351_1" cy:nodeId="1342">
    <graphics x="981.2178344726562" z="0.0" y="2434.149169921875"/>
  </node>
  <node id="31006" label="WP_111415595_3" cy:nodeId="1343">
    <graphics x="934.8261108398438" z="0.0" y="2473.431640625"/>
  </node>
  <node id="31005" label="WP_053747924_1" cy:nodeId="1344">
    <graphics x="964.2855224609375" z="0.0" y="2374.017822265625"/>
  </node>
  <node id="31004" label="WP_088799362_2" cy:nodeId="1345">
    <graphics x="966.9085083007812" z="0.0" y="2520.4462890625"/>
  </node>
  <node id="31003" label="WP_063274437_1" cy:nodeId="1346">
    <graphics x="869.699951171875" z="0.0" y="2478.888671875"/>
  </node>
  <node id="31002" label="WP_062440803_1" cy:nodeId="1347">
    <graphics x="2467.5888671875" z="0.0" y="2050.6142578125"/>
  </node>
  <node id="31001" label="WP_114029832_1" cy:nodeId="1348">
    <graphics x="2565.108154296875" z="0.0" y="1997.7611083984375"/>
  </node>
  <node id="31000" label="SIR58548_1" cy:nodeId="1349">
    <graphics x="2477.153564453125" z="0.0" y="2109.70751953125"/>
  </node>
  <node id="30999" label="WP_066366076_1" cy:nodeId="1350">
    <graphics x="2610.367919921875" z="0.0" y="2032.988037109375"/>
  </node>
  <node id="30998" label="WP_062349267_1" cy:nodeId="1351">
    <graphics x="2618.220458984375" z="0.0" y="2092.84228515625"/>
  </node>
  <node id="30997" label="WP_049570352_3" cy:nodeId="1352">
    <graphics x="2566.539306640625" z="0.0" y="2080.371826171875"/>
  </node>
  <node id="30996" label="WP_015622289_1" cy:nodeId="1353">
    <graphics x="2578.72509765625" z="0.0" y="2137.562255859375"/>
  </node>
  <node id="30995" label="WP_111167565_1" cy:nodeId="1354">
    <graphics x="2520.491943359375" z="0.0" y="2058.485107421875"/>
  </node>
  <node id="30994" label="WP_061300623_1" cy:nodeId="1355">
    <graphics x="2506.804931640625" z="0.0" y="2002.584716796875"/>
  </node>
  <node id="30993" label="WP_113985589_1" cy:nodeId="1356">
    <graphics x="2522.48388671875" z="0.0" y="2144.400390625"/>
  </node>
  <node id="30992" label="WP_018657395_2" cy:nodeId="1357">
    <graphics x="2744.811279296875" z="0.0" y="2126.437744140625"/>
  </node>
  <node id="30991" label="ALE82507_2" cy:nodeId="1358">
    <graphics x="2849.719970703125" z="0.0" y="1997.7611083984375"/>
  </node>
  <node id="30990" label="WP_132339706_4" cy:nodeId="1359">
    <graphics x="2718.220458984375" z="0.0" y="2170.740478515625"/>
  </node>
  <node id="30989" label="WP_075941351_1" cy:nodeId="1360">
    <graphics x="2800.851806640625" z="0.0" y="2083.294677734375"/>
  </node>
  <node id="30988" label="WP_113979595_1" cy:nodeId="1361">
    <graphics x="2816.099853515625" z="0.0" y="2252.822265625"/>
  </node>
  <node id="30987" label="WP_129800352_1" cy:nodeId="1362">
    <graphics x="2755.1865234375" z="0.0" y="2224.544921875"/>
  </node>
  <node id="30986" label="WP_061294147_1" cy:nodeId="1363">
    <graphics x="2861.4306640625" z="0.0" y="2192.47412109375"/>
  </node>
  <node id="30985" label="WP_092533827_2" cy:nodeId="1364">
    <graphics x="2742.06591796875" z="0.0" y="2043.6240234375"/>
  </node>
  <node id="30984" label="WP_117404578_1" cy:nodeId="1365">
    <graphics x="2849.696044921875" z="0.0" y="2119.7177734375"/>
  </node>
  <node id="30983" label="WP_132172132_1" cy:nodeId="1366">
    <graphics x="2800.853759765625" z="0.0" y="2163.015380859375"/>
  </node>
  <node id="30982" label="WP_017559667_2" cy:nodeId="1367">
    <graphics x="3187.293701171875" z="0.0" y="2184.43505859375"/>
  </node>
  <node id="30981" label="OFK71393_2" cy:nodeId="1368">
    <graphics x="3288.383056640625" z="0.0" y="2107.899658203125"/>
  </node>
  <node id="30980" label="WP_017559667_1" cy:nodeId="1369">
    <graphics x="3098.5380859375" z="0.0" y="2207.19873046875"/>
  </node>
  <node id="30979" label="WP_083296694_1" cy:nodeId="1370">
    <graphics x="3250.153564453125" z="0.0" y="2011.8897705078125"/>
  </node>
  <node id="30978" label="WP_017608824_2" cy:nodeId="1371">
    <graphics x="3166.320068359375" z="0.0" y="2098.915283203125"/>
  </node>
  <node id="30977" label="WP_046468711_3" cy:nodeId="1372">
    <graphics x="3093.358642578125" z="0.0" y="2079.105224609375"/>
  </node>
  <node id="30976" label="WP_120205519_2" cy:nodeId="1373">
    <graphics x="2975.8154296875" z="0.0" y="2008.419677734375"/>
  </node>
  <node id="30975" label="WP_119835460_2" cy:nodeId="1374">
    <graphics x="2961.4306640625" z="0.0" y="2089.15673828125"/>
  </node>
  <node id="30974" label="WP_101559196_2" cy:nodeId="1375">
    <graphics x="3053.920166015625" z="0.0" y="1997.7611083984375"/>
  </node>
  <node id="30973" label="WP_131103335_5" cy:nodeId="1376">
    <graphics x="3037.244384765625" z="0.0" y="2116.9326171875"/>
  </node>
  <node id="30972" label="WP_091114658_1" cy:nodeId="1377">
    <graphics x="3428.9423828125" z="0.0" y="1998.9805908203125"/>
  </node>
  <node id="30971" label="WP_106275543_1" cy:nodeId="1378">
    <graphics x="3487.130859375" z="0.0" y="1997.7611083984375"/>
  </node>
  <node id="30970" label="SFO01480_1" cy:nodeId="1379">
    <graphics x="3485.35302734375" z="0.0" y="2085.76025390625"/>
  </node>
  <node id="30969" label="PYG35723_2" cy:nodeId="1380">
    <graphics x="3388.383056640625" z="0.0" y="2050.061767578125"/>
  </node>
  <node id="30968" label="WP_093583210_1" cy:nodeId="1381">
    <graphics x="3444.54443359375" z="0.0" y="2053.512451171875"/>
  </node>
  <node id="30967" label="WP_110909804_2" cy:nodeId="1382">
    <graphics x="3540.785400390625" z="0.0" y="2089.48193359375"/>
  </node>
  <node id="30966" label="SDC53518_1" cy:nodeId="1383">
    <graphics x="3399.52392578125" z="0.0" y="2107.53857421875"/>
  </node>
  <node id="30965" label="WP_089404560_2" cy:nodeId="1384">
    <graphics x="3441.648681640625" z="0.0" y="2141.330810546875"/>
  </node>
  <node id="30964" label="WP_091365795_1" cy:nodeId="1385">
    <graphics x="3529.739990234375" z="0.0" y="2032.19921875"/>
  </node>
  <node id="30963" label="WP_075012634_1" cy:nodeId="1386">
    <graphics x="3500.1298828125" z="0.0" y="2139.89306640625"/>
  </node>
  <node id="30962" label="AKH86621_2" cy:nodeId="1387">
    <graphics x="3722.568603515625" z="0.0" y="2146.751708984375"/>
  </node>
  <node id="30961" label="ANS70161_2" cy:nodeId="1388">
    <graphics x="3739.693603515625" z="0.0" y="2070.62255859375"/>
  </node>
  <node id="30960" label="PJJ39560_3" cy:nodeId="1389">
    <graphics x="3666.921875" z="0.0" y="2130.5869140625"/>
  </node>
  <node id="30959" label="WP_078572841_3" cy:nodeId="1390">
    <graphics x="3640.785400390625" z="0.0" y="2064.764892578125"/>
  </node>
  <node id="30958" label="WP_131561563_1" cy:nodeId="1391">
    <graphics x="3689.798828125" z="0.0" y="2079.668701171875"/>
  </node>
  <node id="30957" label="RZU94771_3" cy:nodeId="1392">
    <graphics x="3777.185302734375" z="0.0" y="2019.9273681640625"/>
  </node>
  <node id="30956" label="WP_052770273_2" cy:nodeId="1393">
    <graphics x="3799.11669921875" z="0.0" y="2075.348388671875"/>
  </node>
  <node id="30955" label="WP_078564093_3" cy:nodeId="1394">
    <graphics x="3674.478271484375" z="0.0" y="2013.529052734375"/>
  </node>
  <node id="30954" label="WP_100302786_3" cy:nodeId="1395">
    <graphics x="3726.7294921875" z="0.0" y="1997.7611083984375"/>
  </node>
  <node id="30953" label="AXG59058_2" cy:nodeId="1396">
    <graphics x="3773.374267578125" z="0.0" y="2127.989990234375"/>
  </node>
  <node id="30952" label="WP_092556553_3" cy:nodeId="1397">
    <graphics x="737.9308471679688" z="0.0" y="2062.395263671875"/>
  </node>
  <node id="30951" label="WP_017589866_3" cy:nodeId="1398">
    <graphics x="969.9231567382812" z="0.0" y="2094.091064453125"/>
  </node>
  <node id="30950" label="WP_100806338_6" cy:nodeId="1399">
    <graphics x="756.6170654296875" z="0.0" y="1997.7611083984375"/>
  </node>
  <node id="30949" label="WP_059190156_4" cy:nodeId="1400">
    <graphics x="562.375" z="0.0" y="2066.0859375"/>
  </node>
  <node id="30948" label="WP_023554016_3" cy:nodeId="1401">
    <graphics x="681.2998657226562" z="0.0" y="2079.851806640625"/>
  </node>
  <node id="30947" label="WP_124286732_7" cy:nodeId="1402">
    <graphics x="662.9852905273438" z="0.0" y="2171.869384765625"/>
  </node>
  <node id="30946" label="WP_100806338_7" cy:nodeId="1403">
    <graphics x="839.0589599609375" z="0.0" y="2005.494873046875"/>
  </node>
  <node id="30945" label="WP_006347379_1" cy:nodeId="1404">
    <graphics x="807.1679077148438" z="0.0" y="2094.931884765625"/>
  </node>
  <node id="30944" label="WP_030633187_1" cy:nodeId="1405">
    <graphics x="847.3306884765625" z="0.0" y="2087.619140625"/>
  </node>
  <node id="30943" label="WP_114032054_1" cy:nodeId="1406">
    <graphics x="760.9360961914062" z="0.0" y="2139.920654296875"/>
  </node>
  <node id="30942" label="WP_123603612_2" cy:nodeId="1407">
    <graphics x="853.3101806640625" z="0.0" y="2197.6142578125"/>
  </node>
  <node id="30941" label="SBO93312_1" cy:nodeId="1408">
    <graphics x="1325.938720703125" z="0.0" y="2091.114501953125"/>
  </node>
  <node id="30940" label="SPL97283_1" cy:nodeId="1409">
    <graphics x="1177.20947265625" z="0.0" y="2038.96826171875"/>
  </node>
  <node id="30939" label="WP_134033092_1" cy:nodeId="1410">
    <graphics x="1069.9232177734375" z="0.0" y="2171.24658203125"/>
  </node>
  <node id="30938" label="WP_103960548_2" cy:nodeId="1411">
    <graphics x="1275.2413330078125" z="0.0" y="2069.71337890625"/>
  </node>
  <node id="30937" label="WP_090941614_2" cy:nodeId="1412">
    <graphics x="1177.17724609375" z="0.0" y="2107.442138671875"/>
  </node>
  <node id="30936" label="WP_113984581_2" cy:nodeId="1413">
    <graphics x="1317.3582763671875" z="0.0" y="2027.4278564453125"/>
  </node>
  <node id="30935" label="WP_084772427_3" cy:nodeId="1414">
    <graphics x="1229.1641845703125" z="0.0" y="2138.9716796875"/>
  </node>
  <node id="30934" label="SEG99236_2" cy:nodeId="1415">
    <graphics x="1269.962646484375" z="0.0" y="1997.7611083984375"/>
  </node>
  <node id="30933" label="WP_111170305_1" cy:nodeId="1416">
    <graphics x="1283.9227294921875" z="0.0" y="2135.970703125"/>
  </node>
  <node id="30932" label="WP_012891705_1" cy:nodeId="1417">
    <graphics x="1223.3348388671875" z="0.0" y="2070.116455078125"/>
  </node>
  <node id="30931" label="WP_080042116_1" cy:nodeId="1418">
    <graphics x="1220.749267578125" z="0.0" y="1998.4945068359375"/>
  </node>
  <node id="30930" label="WP_113979657_4" cy:nodeId="1419">
    <graphics x="1585.6929931640625" z="0.0" y="2140.184814453125"/>
  </node>
  <node id="30929" label="WP_114018158_1" cy:nodeId="1420">
    <graphics x="1473.675537109375" z="0.0" y="2132.37548828125"/>
  </node>
  <node id="30928" label="WP_084211656_2" cy:nodeId="1421">
    <graphics x="1453.0592041015625" z="0.0" y="2004.28369140625"/>
  </node>
  <node id="30927" label="WP_079171959_1" cy:nodeId="1422">
    <graphics x="1536.357421875" z="0.0" y="2083.736328125"/>
  </node>
  <node id="30926" label="WP_111166051_7" cy:nodeId="1423">
    <graphics x="1467.611572265625" z="0.0" y="2081.290283203125"/>
  </node>
  <node id="30925" label="WP_099881056_1" cy:nodeId="1424">
    <graphics x="1613.112548828125" z="0.0" y="2081.228759765625"/>
  </node>
  <node id="30924" label="WP_114021280_1" cy:nodeId="1425">
    <graphics x="1500.555908203125" z="0.0" y="2023.9002685546875"/>
  </node>
  <node id="30923" label="WP_027760735_1" cy:nodeId="1426">
    <graphics x="1571.2301025390625" z="0.0" y="2040.224365234375"/>
  </node>
  <node id="30922" label="OEV01037_1" cy:nodeId="1427">
    <graphics x="1523.34912109375" z="0.0" y="2138.781982421875"/>
  </node>
  <node id="30921" label="WP_086575168_3" cy:nodeId="1428">
    <graphics x="1545.4306640625" z="0.0" y="1997.7611083984375"/>
  </node>
  <node id="30920" label="WP_111035529_1" cy:nodeId="1429">
    <graphics x="1425.938720703125" z="0.0" y="2054.76611328125"/>
  </node>
  <node id="30919" label="WP_043014356_2" cy:nodeId="1430">
    <graphics x="1859.899658203125" z="0.0" y="2060.37646484375"/>
  </node>
  <node id="30918" label="ESU58068_2" cy:nodeId="1431">
    <graphics x="1839.6300048828125" z="0.0" y="2019.3255615234375"/>
  </node>
  <node id="30917" label="WP_046096646_2" cy:nodeId="1432">
    <graphics x="1756.8109130859375" z="0.0" y="2145.582275390625"/>
  </node>
  <node id="30916" label="AIG09585_2" cy:nodeId="1433">
    <graphics x="1815.43701171875" z="0.0" y="2148.63037109375"/>
  </node>
  <node id="30915" label="AKS13949_1" cy:nodeId="1434">
    <graphics x="1744.1578369140625" z="0.0" y="2008.7213134765625"/>
  </node>
  <node id="30914" label="AER69640_1" cy:nodeId="1435">
    <graphics x="1721.406005859375" z="0.0" y="2107.115966796875"/>
  </node>
  <node id="30913" label="WP_087454414_2" cy:nodeId="1436">
    <graphics x="1856.8411865234375" z="0.0" y="2108.283203125"/>
  </node>
  <node id="30912" label="AKP09252_2" cy:nodeId="1437">
    <graphics x="1776.2052001953125" z="0.0" y="2055.375"/>
  </node>
  <node id="30911" label="WP_038620030_2" cy:nodeId="1438">
    <graphics x="1713.112548828125" z="0.0" y="2056.24658203125"/>
  </node>
  <node id="30910" label="WP_048589183_2" cy:nodeId="1439">
    <graphics x="1795.5035400390625" z="0.0" y="1997.7611083984375"/>
  </node>
  <node id="30909" label="WP_054468484_3" cy:nodeId="1440">
    <graphics x="1795.3079833984375" z="0.0" y="2100.219970703125"/>
  </node>
  <node id="30908" label="WP_036403339_1" cy:nodeId="1441">
    <graphics x="1998.267333984375" z="0.0" y="2145.927734375"/>
  </node>
  <node id="30907" label="WP_083271029_1" cy:nodeId="1442">
    <graphics x="2094.76171875" z="0.0" y="2116.98193359375"/>
  </node>
  <node id="30906" label="WP_055578070_1" cy:nodeId="1443">
    <graphics x="1959.899658203125" z="0.0" y="2100.144287109375"/>
  </node>
  <node id="30905" label="WP_122442751_1" cy:nodeId="1444">
    <graphics x="2053.023193359375" z="0.0" y="2062.292236328125"/>
  </node>
  <node id="30904" label="WP_065136618_1" cy:nodeId="1445">
    <graphics x="2016.458984375" z="0.0" y="2095.27294921875"/>
  </node>
  <node id="30903" label="WP_065164254_2" cy:nodeId="1446">
    <graphics x="2087.52392578125" z="0.0" y="2015.96240234375"/>
  </node>
  <node id="30902" label="WP_075510821_1" cy:nodeId="1447">
    <graphics x="2110.817626953125" z="0.0" y="2067.430419921875"/>
  </node>
  <node id="30901" label="WP_133437797_2" cy:nodeId="1448">
    <graphics x="1991.7703857421875" z="0.0" y="2011.84814453125"/>
  </node>
  <node id="30900" label="ORC04413_1" cy:nodeId="1449">
    <graphics x="2054.177978515625" z="0.0" y="2146.2568359375"/>
  </node>
  <node id="30899" label="RUP01435_1" cy:nodeId="1450">
    <graphics x="1962.6812744140625" z="0.0" y="2051.0205078125"/>
  </node>
  <node id="30898" label="ODR23958_1" cy:nodeId="1451">
    <graphics x="2036.601318359375" z="0.0" y="1997.7611083984375"/>
  </node>
  <node id="30897" label="WP_091448332_1" cy:nodeId="1452">
    <graphics x="2254.7353515625" z="0.0" y="2078.447021484375"/>
  </node>
  <node id="30896" label="SDY68794_3" cy:nodeId="1453">
    <graphics x="2249.360107421875" z="0.0" y="2142.818359375"/>
  </node>
  <node id="30895" label="WP_041241887_1" cy:nodeId="1454">
    <graphics x="2353.22607421875" z="0.0" y="2128.116455078125"/>
  </node>
  <node id="30894" label="WP_089304860_1" cy:nodeId="1455">
    <graphics x="2280.517578125" z="0.0" y="1997.7611083984375"/>
  </node>
  <node id="30893" label="WP_091159224_3" cy:nodeId="1456">
    <graphics x="2302.8994140625" z="0.0" y="2156.180419921875"/>
  </node>
  <node id="30892" label="SDL97273_2" cy:nodeId="1457">
    <graphics x="2367.5888671875" z="0.0" y="2074.504638671875"/>
  </node>
  <node id="30891" label="WP_091374161_1" cy:nodeId="1458">
    <graphics x="2228.809814453125" z="0.0" y="2030.22021484375"/>
  </node>
  <node id="30890" label="WP_113781263_1" cy:nodeId="1459">
    <graphics x="2302.349609375" z="0.0" y="2040.8388671875"/>
  </node>
  <node id="30889" label="ADB73782_1" cy:nodeId="1460">
    <graphics x="2308.270263671875" z="0.0" y="2096.985107421875"/>
  </node>
  <node id="30888" label="SDN42488_1" cy:nodeId="1461">
    <graphics x="2210.817626953125" z="0.0" y="2096.4296875"/>
  </node>
  <node id="30887" label="WP_091216389_2" cy:nodeId="1462">
    <graphics x="2349.49755859375" z="0.0" y="2022.153564453125"/>
  </node>
  <node id="30886" label="WP_015622289_3" cy:nodeId="1463">
    <graphics x="4930.177734375" z="0.0" y="1509.41455078125"/>
  </node>
  <node id="30885" label="WP_113985589_3" cy:nodeId="1464">
    <graphics x="5014.97900390625" z="0.0" y="1617.7376708984375"/>
  </node>
  <node id="30884" label="WP_061300623_3" cy:nodeId="1465">
    <graphics x="4914.3115234375" z="0.0" y="1598.736083984375"/>
  </node>
  <node id="30883" label="SIR58548_2" cy:nodeId="1466">
    <graphics x="4890.05029296875" z="0.0" y="1531.6610107421875"/>
  </node>
  <node id="30882" label="WP_084316863_1" cy:nodeId="1467">
    <graphics x="4907.21630859375" z="0.0" y="1657.7259521484375"/>
  </node>
  <node id="30881" label="WP_114029832_3" cy:nodeId="1468">
    <graphics x="4862.35546875" z="0.0" y="1569.8929443359375"/>
  </node>
  <node id="30880" label="WP_081903334_1" cy:nodeId="1469">
    <graphics x="5013.29345703125" z="0.0" y="1563.088623046875"/>
  </node>
  <node id="30879" label="WP_111167565_4" cy:nodeId="1470">
    <graphics x="4955.33984375" z="0.0" y="1563.3294677734375"/>
  </node>
  <node id="30878" label="WP_111700764_2" cy:nodeId="1471">
    <graphics x="4978.533203125" z="0.0" y="1516.932861328125"/>
  </node>
  <node id="30877" label="WP_083744315_1" cy:nodeId="1472">
    <graphics x="4961.81982421875" z="0.0" y="1665.2774658203125"/>
  </node>
  <node id="30876" label="WP_049570352_4" cy:nodeId="1473">
    <graphics x="4968.3935546875" z="0.0" y="1619.6802978515625"/>
  </node>
  <node id="30875" label="WP_066366076_3" cy:nodeId="1474">
    <graphics x="4866.01220703125" z="0.0" y="1619.6942138671875"/>
  </node>
  <node id="30874" label="WP_110909804_3" cy:nodeId="1475">
    <graphics x="57.29217529296875" z="0.0" y="2077.2783203125"/>
  </node>
  <node id="30873" label="SFO01480_3" cy:nodeId="1476">
    <graphics x="54.3458251953125" z="0.0" y="2274.017822265625"/>
  </node>
  <node id="30872" label="WP_076159164_1" cy:nodeId="1477">
    <graphics x="103.54266357421875" z="0.0" y="2131.861083984375"/>
  </node>
  <node id="30871" label="WP_089404560_1" cy:nodeId="1478">
    <graphics x="107.60513305664062" z="0.0" y="2060.093017578125"/>
  </node>
  <node id="30870" label="WP_110909804_1" cy:nodeId="1479">
    <graphics x="113.47799682617188" z="0.0" y="2000.7391357421875"/>
  </node>
  <node id="30869" label="PYG35723_3" cy:nodeId="1480">
    <graphics x="70.50469970703125" z="0.0" y="2148.878173828125"/>
  </node>
  <node id="30868" label="SFO01480_2" cy:nodeId="1481">
    <graphics x="22.9796142578125" z="0.0" y="2018.453369140625"/>
  </node>
  <node id="30867" label="WP_075012634_2" cy:nodeId="1482">
    <graphics x="66.78363037109375" z="0.0" y="1997.7611083984375"/>
  </node>
  <node id="30866" label="SHF79230_1" cy:nodeId="1483">
    <graphics x="149.12921142578125" z="0.0" y="2105.107421875"/>
  </node>
  <node id="30865" label="WP_073419543_1" cy:nodeId="1484">
    <graphics x="154.87158203125" z="0.0" y="2046.488525390625"/>
  </node>
  <node id="30864" label="WP_093583210_2" cy:nodeId="1485">
    <graphics x="0.0" z="0.0" y="2065.931640625"/>
  </node>
  <node id="30863" label="PYG35723_1" cy:nodeId="1486">
    <graphics x="16.61181640625" z="0.0" y="2117.464111328125"/>
  </node>
  <node id="30862" label="WP_108249502_1" cy:nodeId="1487">
    <graphics x="254.87158203125" z="0.0" y="2120.87353515625"/>
  </node>
  <node id="30861" label="KZC95159_2" cy:nodeId="1488">
    <graphics x="435.92523193359375" z="0.0" y="2134.949951171875"/>
  </node>
  <node id="30860" label="WP_086517141_2" cy:nodeId="1489">
    <graphics x="462.375" z="0.0" y="2077.38330078125"/>
  </node>
  <node id="30859" label="OUE10317_2" cy:nodeId="1490">
    <graphics x="429.2691650390625" z="0.0" y="2011.4453125"/>
  </node>
  <node id="30858" label="AWF97203_2" cy:nodeId="1491">
    <graphics x="309.0206298828125" z="0.0" y="2031.1005859375"/>
  </node>
  <node id="30857" label="WP_087197904_2" cy:nodeId="1492">
    <graphics x="359.8773498535156" z="0.0" y="2048.17626953125"/>
  </node>
  <node id="30856" label="WP_119402500_1" cy:nodeId="1493">
    <graphics x="365.2822570800781" z="0.0" y="2106.703369140625"/>
  </node>
  <node id="30855" label="WP_086515725_2" cy:nodeId="1494">
    <graphics x="380.6523132324219" z="0.0" y="2147.5048828125"/>
  </node>
  <node id="30854" label="WP_104343881_2" cy:nodeId="1495">
    <graphics x="324.3313903808594" z="0.0" y="2142.415283203125"/>
  </node>
  <node id="30853" label="OUE24647_2" cy:nodeId="1496">
    <graphics x="416.6082458496094" z="0.0" y="2068.413330078125"/>
  </node>
  <node id="30852" label="WP_053775823_2" cy:nodeId="1497">
    <graphics x="371.42919921875" z="0.0" y="1997.7611083984375"/>
  </node>
  <node id="30851" label="WP_043668521_2" cy:nodeId="1498">
    <graphics x="320.9012145996094" z="0.0" y="2086.80859375"/>
  </node>
  <node id="30850" label="WP_100243842_1" cy:nodeId="1499">
    <graphics x="3980.118896484375" z="0.0" y="1525.4210205078125"/>
  </node>
  <node id="30849" label="WP_048819674_1" cy:nodeId="1500">
    <graphics x="4102.57958984375" z="0.0" y="1556.625"/>
  </node>
  <node id="30848" label="AFV25483_1" cy:nodeId="1501">
    <graphics x="4069.425537109375" z="0.0" y="1526.85107421875"/>
  </node>
  <node id="30847" label="WP_020115555_1" cy:nodeId="1502">
    <graphics x="3955.087646484375" z="0.0" y="1567.3929443359375"/>
  </node>
  <node id="30846" label="GAQ63669_1" cy:nodeId="1503">
    <graphics x="3984.68603515625" z="0.0" y="1657.2781982421875"/>
  </node>
  <node id="30845" label="AFV25482_1" cy:nodeId="1504">
    <graphics x="4027.822265625" z="0.0" y="1509.41455078125"/>
  </node>
  <node id="30844" label="WP_059081288_1" cy:nodeId="1505">
    <graphics x="4013.364501953125" z="0.0" y="1618.039794921875"/>
  </node>
  <node id="30843" label="CBG72692_1" cy:nodeId="1506">
    <graphics x="4037.109619140625" z="0.0" y="1667.4591064453125"/>
  </node>
  <node id="30842" label="WP_005486705_1" cy:nodeId="1507">
    <graphics x="4079.48046875" z="0.0" y="1647.1951904296875"/>
  </node>
  <node id="30841" label="EMF50559_1" cy:nodeId="1508">
    <graphics x="4013.8564453125" z="0.0" y="1564.30615234375"/>
  </node>
  <node id="30840" label="EKX68557_1" cy:nodeId="1509">
    <graphics x="3956.73095703125" z="0.0" y="1614.3466796875"/>
  </node>
  <node id="30839" label="WP_059081255_1" cy:nodeId="1510">
    <graphics x="4060.510498046875" z="0.0" y="1591.6171875"/>
  </node>
  <node id="30838" label="EKX68554_1" cy:nodeId="1511">
    <graphics x="4108.78759765625" z="0.0" y="1607.64599609375"/>
  </node>
  <node id="30837" label="WP_082822395_2" cy:nodeId="1512">
    <graphics x="4305.85107421875" z="0.0" y="1765.8212890625"/>
  </node>
  <node id="30836" label="WP_100806338_4" cy:nodeId="1513">
    <graphics x="4432.33251953125" z="0.0" y="1582.2041015625"/>
  </node>
  <node id="30835" label="YP_008998156_1" cy:nodeId="1514">
    <graphics x="4494.51806640625" z="0.0" y="1624.081787109375"/>
  </node>
  <node id="30834" label="WP_030794381_3" cy:nodeId="1515">
    <graphics x="4363.30322265625" z="0.0" y="1594.843994140625"/>
  </node>
  <node id="30833" label="WP_100521517_1" cy:nodeId="1516">
    <graphics x="4313.59130859375" z="0.0" y="1865.8328857421875"/>
  </node>
  <node id="30832" label="WP_079611677_1" cy:nodeId="1517">
    <graphics x="4208.78759765625" z="0.0" y="1792.8984375"/>
  </node>
  <node id="30831" label="WP_084521174_1" cy:nodeId="1518">
    <graphics x="4225.13037109375" z="0.0" y="1881.1842041015625"/>
  </node>
  <node id="30830" label="WP_055633699_1" cy:nodeId="1519">
    <graphics x="4386.1796875" z="0.0" y="1649.954345703125"/>
  </node>
  <node id="30829" label="WP_033309246_1" cy:nodeId="1520">
    <graphics x="4445.49462890625" z="0.0" y="1651.233154296875"/>
  </node>
  <node id="30828" label="WP_121801511_3" cy:nodeId="1521">
    <graphics x="4370.8564453125" z="0.0" y="1539.4718017578125"/>
  </node>
  <node id="30827" label="WP_114626704_1" cy:nodeId="1522">
    <graphics x="4474.45361328125" z="0.0" y="1520.637939453125"/>
  </node>
  <node id="30826" label="WP_015663091_1" cy:nodeId="1523">
    <graphics x="4419.05322265625" z="0.0" y="1509.41455078125"/>
  </node>
  <node id="30825" label="WP_019885858_2" cy:nodeId="1524">
    <graphics x="4505.0009765625" z="0.0" y="1568.18359375"/>
  </node>
  <node id="30824" label="WP_079099227_1" cy:nodeId="1525">
    <graphics x="4762.35546875" z="0.0" y="1585.1796875"/>
  </node>
  <node id="30823" label="COV92604_1" cy:nodeId="1526">
    <graphics x="4662.91845703125" z="0.0" y="1509.41455078125"/>
  </node>
  <node id="30822" label="CFS33831_1" cy:nodeId="1527">
    <graphics x="4656.3232421875" z="0.0" y="1569.7796630859375"/>
  </node>
  <node id="30821" label="EFD73056_2" cy:nodeId="1528">
    <graphics x="4710.45263671875" z="0.0" y="1659.1666259765625"/>
  </node>
  <node id="30820" label="CKX97298_1" cy:nodeId="1529">
    <graphics x="4746.65283203125" z="0.0" y="1627.706787109375"/>
  </node>
  <node id="30819" label="EGB29232_1" cy:nodeId="1530">
    <graphics x="4620.69775390625" z="0.0" y="1534.09521484375"/>
  </node>
  <node id="30818" label="COV81994_1" cy:nodeId="1531">
    <graphics x="4658.48828125" z="0.0" y="1659.2547607421875"/>
  </node>
  <node id="30817" label="AKR01079_1" cy:nodeId="1532">
    <graphics x="4685.19384765625" z="0.0" y="1614.8243408203125"/>
  </node>
  <node id="30816" label="WP_031737334_1" cy:nodeId="1533">
    <graphics x="4623.060546875" z="0.0" y="1628.0831298828125"/>
  </node>
  <node id="30815" label="COV23412_1" cy:nodeId="1534">
    <graphics x="4709.56640625" z="0.0" y="1510.044189453125"/>
  </node>
  <node id="30814" label="WP_075911259_1" cy:nodeId="1535">
    <graphics x="4750.34912109375" z="0.0" y="1536.37158203125"/>
  </node>
  <node id="30813" label="WP_086155057_1" cy:nodeId="1536">
    <graphics x="4709.70849609375" z="0.0" y="1567.1300048828125"/>
  </node>
  <node id="30812" label="SGD85762_1" cy:nodeId="1537">
    <graphics x="4605.0009765625" z="0.0" y="1584.2431640625"/>
  </node>
  <node id="30811" label="OOK64193_1" cy:nodeId="1538">
    <graphics x="3556.7587890625" z="0.0" y="1566.1602783203125"/>
  </node>
  <node id="30810" label="EPQ80131_3" cy:nodeId="1539">
    <graphics x="3596.614990234375" z="0.0" y="1632.1915283203125"/>
  </node>
  <node id="30809" label="RUP01435_3" cy:nodeId="1540">
    <graphics x="3503.44189453125" z="0.0" y="1509.41455078125"/>
  </node>
  <node id="30808" label="WP_085249702_3" cy:nodeId="1541">
    <graphics x="3552.6181640625" z="0.0" y="1513.009521484375"/>
  </node>
  <node id="30807" label="WP_086085423_2" cy:nodeId="1542">
    <graphics x="3449.9931640625" z="0.0" y="1595.3763427734375"/>
  </node>
  <node id="30806" label="ORC04413_2" cy:nodeId="1543">
    <graphics x="3498.367919921875" z="0.0" y="1609.060546875"/>
  </node>
  <node id="30805" label="WP_036403339_3" cy:nodeId="1544">
    <graphics x="3458.710693359375" z="0.0" y="1544.7962646484375"/>
  </node>
  <node id="30804" label="WP_055578070_2" cy:nodeId="1545">
    <graphics x="3506.833251953125" z="0.0" y="1556.2774658203125"/>
  </node>
  <node id="30803" label="WP_122442751_2" cy:nodeId="1546">
    <graphics x="3512.953857421875" z="0.0" y="1665.0909423828125"/>
  </node>
  <node id="30802" label="WP_075510821_2" cy:nodeId="1547">
    <graphics x="3467.800048828125" z="0.0" y="1643.0616455078125"/>
  </node>
  <node id="30801" label="WP_065164254_1" cy:nodeId="1548">
    <graphics x="3549.125732421875" z="0.0" y="1615.2977294921875"/>
  </node>
  <node id="30800" label="WP_083046415_1" cy:nodeId="1549">
    <graphics x="3560.07861328125" z="0.0" y="1662.8856201171875"/>
  </node>
  <node id="30799" label="WP_085160326_1" cy:nodeId="1550">
    <graphics x="3595.384521484375" z="0.0" y="1539.5704345703125"/>
  </node>
  <node id="30798" label="WP_085673955_1" cy:nodeId="1551">
    <graphics x="3608.990234375" z="0.0" y="1586.8697509765625"/>
  </node>
  <node id="30797" label="WP_024818115_4" cy:nodeId="1552">
    <graphics x="3831.173828125" z="0.0" y="1685.6368408203125"/>
  </node>
  <node id="30796" label="AFR30485_4" cy:nodeId="1553">
    <graphics x="3802.592041015625" z="0.0" y="1740.4378662109375"/>
  </node>
  <node id="30795" label="WP_128397239_4" cy:nodeId="1554">
    <graphics x="3720.454345703125" z="0.0" y="1797.2977294921875"/>
  </node>
  <node id="30794" label="WP_062097999_4" cy:nodeId="1555">
    <graphics x="3766.695068359375" z="0.0" y="1821.1015625"/>
  </node>
  <node id="30793" label="AOY69839_4" cy:nodeId="1556">
    <graphics x="3853.88671875" z="0.0" y="1782.795166015625"/>
  </node>
  <node id="30792" label="WP_031216848_4" cy:nodeId="1557">
    <graphics x="3816.692138671875" z="0.0" y="1816.5928955078125"/>
  </node>
  <node id="30791" label="WP_043470682_4" cy:nodeId="1558">
    <graphics x="3781.263916015625" z="0.0" y="1688.302978515625"/>
  </node>
  <node id="30790" label="WP_028265499_5" cy:nodeId="1559">
    <graphics x="3772.427978515625" z="0.0" y="1509.41455078125"/>
  </node>
  <node id="30789" label="WP_062071474_4" cy:nodeId="1560">
    <graphics x="3708.990234375" z="0.0" y="1728.97705078125"/>
  </node>
  <node id="30788" label="SCZ59071_4" cy:nodeId="1561">
    <graphics x="3813.037353515625" z="0.0" y="1617.5980224609375"/>
  </node>
  <node id="30787" label="WP_091470208_4" cy:nodeId="1562">
    <graphics x="3733.07958984375" z="0.0" y="1692.8935546875"/>
  </node>
  <node id="30786" label="WP_089596247_4" cy:nodeId="1563">
    <graphics x="3855.087646484375" z="0.0" y="1722.61962890625"/>
  </node>
  <node id="30785" label="WP_105691909_4" cy:nodeId="1564">
    <graphics x="3756.6083984375" z="0.0" y="1747.325927734375"/>
  </node>
  <node id="30784" label="WP_026542026_4" cy:nodeId="1565">
    <graphics x="3739.716064453125" z="0.0" y="1621.7733154296875"/>
  </node>
  <node id="30783" label="WP_075814930_1" cy:nodeId="1566">
    <graphics x="2947.5576171875" z="0.0" y="1509.41455078125"/>
  </node>
  <node id="30782" label="WP_017589866_5" cy:nodeId="1567">
    <graphics x="2955.29052734375" z="0.0" y="1728.470703125"/>
  </node>
  <node id="30781" label="WP_073704754_3" cy:nodeId="1568">
    <graphics x="2982.73828125" z="0.0" y="1575.2086181640625"/>
  </node>
  <node id="30780" label="WP_121183327_2" cy:nodeId="1569">
    <graphics x="2914.35400390625" z="0.0" y="1690.13720703125"/>
  </node>
  <node id="30779" label="PSK95408_1" cy:nodeId="1570">
    <graphics x="2999.263916015625" z="0.0" y="1730.119384765625"/>
  </node>
  <node id="30778" label="WP_053619387_2" cy:nodeId="1571">
    <graphics x="3032.826904296875" z="0.0" y="1678.9324951171875"/>
  </node>
  <node id="30777" label="WP_075924874_2" cy:nodeId="1572">
    <graphics x="2944.296630859375" z="0.0" y="1644.8218994140625"/>
  </node>
  <node id="30776" label="WP_047868005_1" cy:nodeId="1573">
    <graphics x="3028.729736328125" z="0.0" y="1591.33154296875"/>
  </node>
  <node id="30775" label="WP_017615044_1" cy:nodeId="1574">
    <graphics x="2980.784423828125" z="0.0" y="1687.91162109375"/>
  </node>
  <node id="30774" label="WP_087102102_3" cy:nodeId="1575">
    <graphics x="2890.25146484375" z="0.0" y="1623.5382080078125"/>
  </node>
  <node id="30773" label="WP_017563703_1" cy:nodeId="1576">
    <graphics x="2998.6455078125" z="0.0" y="1623.67529296875"/>
  </node>
  <node id="30772" label="WP_097636337_1" cy:nodeId="1577">
    <graphics x="2938.698486328125" z="0.0" y="1599.9678955078125"/>
  </node>
  <node id="30771" label="WP_017617728_1" cy:nodeId="1578">
    <graphics x="3087.939697265625" z="0.0" y="1523.724609375"/>
  </node>
  <node id="30770" label="WP_017596140_1" cy:nodeId="1579">
    <graphics x="3063.67822265625" z="0.0" y="1699.1268310546875"/>
  </node>
  <node id="30769" label="WP_077692191_2" cy:nodeId="1580">
    <graphics x="3058.853759765625" z="0.0" y="1632.3087158203125"/>
  </node>
  <node id="30768" label="EGQ75425_1" cy:nodeId="1581">
    <graphics x="3240.171630859375" z="0.0" y="1659.828857421875"/>
  </node>
  <node id="30767" label="WP_075376581_1" cy:nodeId="1582">
    <graphics x="3202.531005859375" z="0.0" y="1632.6470947265625"/>
  </node>
  <node id="30766" label="WP_009405321_2" cy:nodeId="1583">
    <graphics x="3349.088134765625" z="0.0" y="1613.2078857421875"/>
  </node>
  <node id="30765" label="WP_075417427_1" cy:nodeId="1584">
    <graphics x="3244.8798828125" z="0.0" y="1509.41455078125"/>
  </node>
  <node id="30764" label="WP_126382680_1" cy:nodeId="1585">
    <graphics x="3292.2275390625" z="0.0" y="1509.6539306640625"/>
  </node>
  <node id="30763" label="WP_075414364_1" cy:nodeId="1586">
    <graphics x="3323.555419921875" z="0.0" y="1646.080810546875"/>
  </node>
  <node id="30762" label="WP_075375613_1" cy:nodeId="1587">
    <graphics x="3301.2822265625" z="0.0" y="1586.7415771484375"/>
  </node>
  <node id="30761" label="WP_034253534_1" cy:nodeId="1588">
    <graphics x="3229.963623046875" z="0.0" y="1593.038818359375"/>
  </node>
  <node id="30760" label="VEG28624_1" cy:nodeId="1589">
    <graphics x="3349.9931640625" z="0.0" y="1563.78173828125"/>
  </node>
  <node id="30759" label="WP_075405296_1" cy:nodeId="1590">
    <graphics x="3268.980224609375" z="0.0" y="1620.187255859375"/>
  </node>
  <node id="30758" label="WP_026408316_1" cy:nodeId="1591">
    <graphics x="3210.024169921875" z="0.0" y="1537.206298828125"/>
  </node>
  <node id="30757" label="WP_124933089_1" cy:nodeId="1592">
    <graphics x="3324.776123046875" z="0.0" y="1529.91796875"/>
  </node>
  <node id="30756" label="WP_126414579_1" cy:nodeId="1593">
    <graphics x="3187.939697265625" z="0.0" y="1583.00732421875"/>
  </node>
  <node id="30755" label="WP_026426216_1" cy:nodeId="1594">
    <graphics x="3284.21484375" z="0.0" y="1668.6478271484375"/>
  </node>
  <node id="30754" label="WP_075412233_1" cy:nodeId="1595">
    <graphics x="3261.3134765625" z="0.0" y="1555.78515625"/>
  </node>
  <node id="30753" label="WP_124933089_2" cy:nodeId="1596">
    <graphics x="2774.634765625" z="0.0" y="1637.2899169921875"/>
  </node>
  <node id="30752" label="WP_075414364_2" cy:nodeId="1597">
    <graphics x="2790.25146484375" z="0.0" y="1595.25244140625"/>
  </node>
  <node id="30751" label="WP_075375613_2" cy:nodeId="1598">
    <graphics x="2698.994140625" z="0.0" y="1617.410400390625"/>
  </node>
  <node id="30750" label="WP_034253534_2" cy:nodeId="1599">
    <graphics x="2643.492919921875" z="0.0" y="1588.1796875"/>
  </node>
  <node id="30749" label="WP_009405321_1" cy:nodeId="1600">
    <graphics x="2732.22216796875" z="0.0" y="1559.333251953125"/>
  </node>
  <node id="30748" label="WP_075417427_2" cy:nodeId="1601">
    <graphics x="2742.64453125" z="0.0" y="1604.154541015625"/>
  </node>
  <node id="30747" label="WP_026408316_2" cy:nodeId="1602">
    <graphics x="2634.077880859375" z="0.0" y="1622.173095703125"/>
  </node>
  <node id="30746" label="WP_126414579_2" cy:nodeId="1603">
    <graphics x="2706.0087890625" z="0.0" y="1509.41455078125"/>
  </node>
  <node id="30745" label="WP_126382680_2" cy:nodeId="1604">
    <graphics x="2749.749267578125" z="0.0" y="1519.0743408203125"/>
  </node>
  <node id="30744" label="WP_075376581_2" cy:nodeId="1605">
    <graphics x="2698.43212890625" z="0.0" y="1670.521240234375"/>
  </node>
  <node id="30743" label="EGQ75425_2" cy:nodeId="1606">
    <graphics x="2669.7490234375" z="0.0" y="1523.6612548828125"/>
  </node>
  <node id="30742" label="VEG28624_2" cy:nodeId="1607">
    <graphics x="2687.542724609375" z="0.0" y="1568.475830078125"/>
  </node>
  <node id="30741" label="WP_075405296_2" cy:nodeId="1608">
    <graphics x="2740.977783203125" z="0.0" y="1660.6412353515625"/>
  </node>
  <node id="30740" label="WP_026426216_2" cy:nodeId="1609">
    <graphics x="2635.49755859375" z="0.0" y="1550.758544921875"/>
  </node>
  <node id="30739" label="WP_075846085_1" cy:nodeId="1610">
    <graphics x="2661.7158203125" z="0.0" y="1650.0106201171875"/>
  </node>
  <node id="30738" label="WP_075412233_2" cy:nodeId="1611">
    <graphics x="2778.77099609375" z="0.0" y="1551.65283203125"/>
  </node>
  <node id="30737" label="WP_111167565_3" cy:nodeId="1612">
    <graphics x="2504.511474609375" z="0.0" y="1634.54443359375"/>
  </node>
  <node id="30736" label="WP_113985589_2" cy:nodeId="1613">
    <graphics x="2336.39697265625" z="0.0" y="1731.5325927734375"/>
  </node>
  <node id="30735" label="WP_114029832_2" cy:nodeId="1614">
    <graphics x="2282.552490234375" z="0.0" y="1766.28759765625"/>
  </node>
  <node id="30734" label="WP_066366076_5" cy:nodeId="1615">
    <graphics x="2436.244873046875" z="0.0" y="1509.41455078125"/>
  </node>
  <node id="30733" label="WP_062440803_3" cy:nodeId="1616">
    <graphics x="2534.077880859375" z="0.0" y="1572.9180908203125"/>
  </node>
  <node id="30732" label="WP_015622289_2" cy:nodeId="1617">
    <graphics x="2417.4453125" z="0.0" y="1752.9864501953125"/>
  </node>
  <node id="30731" label="WP_061300623_2" cy:nodeId="1618">
    <graphics x="2213.03076171875" z="0.0" y="1810.7421875"/>
  </node>
  <node id="30730" label="WP_111167565_2" cy:nodeId="1619">
    <graphics x="2327.435546875" z="0.0" y="1808.216064453125"/>
  </node>
  <node id="30729" label="WP_066366076_2" cy:nodeId="1620">
    <graphics x="2267.938232421875" z="0.0" y="1838.773681640625"/>
  </node>
  <node id="30728" label="WP_049570352_1" cy:nodeId="1621">
    <graphics x="2295.4013671875" z="0.0" y="1689.1348876953125"/>
  </node>
  <node id="30727" label="WP_084316863_3" cy:nodeId="1622">
    <graphics x="2391.631591796875" z="0.0" y="1549.815673828125"/>
  </node>
  <node id="30726" label="WP_093603934_2" cy:nodeId="1623">
    <graphics x="2389.567138671875" z="0.0" y="1619.82421875"/>
  </node>
  <node id="30725" label="WP_062349267_4" cy:nodeId="1624">
    <graphics x="2464.974365234375" z="0.0" y="1581.273193359375"/>
  </node>
  <node id="30724" label="WP_015622289_4" cy:nodeId="1625">
    <graphics x="2496.8369140625" z="0.0" y="1517.5791015625"/>
  </node>
  <node id="30723" label="SFR28131_2" cy:nodeId="1626">
    <graphics x="2432.147216796875" z="0.0" y="1652.7637939453125"/>
  </node>
  <node id="30722" label="WP_062349267_2" cy:nodeId="1627">
    <graphics x="2227.3701171875" z="0.0" y="1704.52734375"/>
  </node>
  <node id="30721" label="WP_062440803_2" cy:nodeId="1628">
    <graphics x="2195.257568359375" z="0.0" y="1754.203857421875"/>
  </node>
  <node id="30720" label="OMO45941_1" cy:nodeId="1629">
    <graphics x="2026.46435546875" z="0.0" y="1509.41455078125"/>
  </node>
  <node id="30719" label="WP_054468484_1" cy:nodeId="1630">
    <graphics x="2003.0751953125" z="0.0" y="1559.9852294921875"/>
  </node>
  <node id="30718" label="WP_088246551_1" cy:nodeId="1631">
    <graphics x="2049.560791015625" z="0.0" y="1674.62255859375"/>
  </node>
  <node id="30717" label="WP_070795263_1" cy:nodeId="1632">
    <graphics x="1999.928955078125" z="0.0" y="1676.6796875"/>
  </node>
  <node id="30716" label="WP_043014356_1" cy:nodeId="1633">
    <graphics x="1945.6383056640625" z="0.0" y="1633.504638671875"/>
  </node>
  <node id="30715" label="WP_088264775_1" cy:nodeId="1634">
    <graphics x="1997.3211669921875" z="0.0" y="1523.4443359375"/>
  </node>
  <node id="30714" label="WP_075142776_1" cy:nodeId="1635">
    <graphics x="1934.4461669921875" z="0.0" y="1555.2445068359375"/>
  </node>
  <node id="30713" label="WP_046096646_1" cy:nodeId="1636">
    <graphics x="1968.9327392578125" z="0.0" y="1526.2060546875"/>
  </node>
  <node id="30712" label="AIG09585_1" cy:nodeId="1637">
    <graphics x="1923.98828125" z="0.0" y="1607.592529296875"/>
  </node>
  <node id="30711" label="WP_087454414_1" cy:nodeId="1638">
    <graphics x="2095.257568359375" z="0.0" y="1621.873779296875"/>
  </node>
  <node id="30710" label="BAM28031_1" cy:nodeId="1639">
    <graphics x="1986.0906982421875" z="0.0" y="1641.48095703125"/>
  </node>
  <node id="30709" label="ESU58068_1" cy:nodeId="1640">
    <graphics x="2047.490966796875" z="0.0" y="1606.3621826171875"/>
  </node>
  <node id="30708" label="WP_087454409_1" cy:nodeId="1641">
    <graphics x="2094.495849609375" z="0.0" y="1577.9935302734375"/>
  </node>
  <node id="30707" label="WP_061409829_1" cy:nodeId="1642">
    <graphics x="2012.571044921875" z="0.0" y="1598.340576171875"/>
  </node>
  <node id="30706" label="WP_048589183_1" cy:nodeId="1643">
    <graphics x="2067.491943359375" z="0.0" y="1527.755615234375"/>
  </node>
  <node id="30705" label="WP_038620030_1" cy:nodeId="1644">
    <graphics x="2068.42138671875" z="0.0" y="1644.9400634765625"/>
  </node>
  <node id="30704" label="WP_088290452_1" cy:nodeId="1645">
    <graphics x="1967.1571044921875" z="0.0" y="1669.360595703125"/>
  </node>
  <node id="30703" label="AFK17249_1" cy:nodeId="1646">
    <graphics x="1961.4642333984375" z="0.0" y="1578.857177734375"/>
  </node>
  <node id="30702" label="AKP09252_1" cy:nodeId="1647">
    <graphics x="2050.858642578125" z="0.0" y="1563.2587890625"/>
  </node>
  <node id="30701" label="WP_123292368_1" cy:nodeId="1648">
    <graphics x="1482.778564453125" z="0.0" y="1740.169921875"/>
  </node>
  <node id="30700" label="WP_053775070_4" cy:nodeId="1649">
    <graphics x="1528.00341796875" z="0.0" y="1710.49169921875"/>
  </node>
  <node id="30699" label="WP_053775076_9003" cy:nodeId="1650">
    <graphics x="1540.2606201171875" z="0.0" y="1831.2081298828125"/>
  </node>
  <node id="30698" label="WP_123292376_2" cy:nodeId="1651">
    <graphics x="1445.2279052734375" z="0.0" y="1716.049072265625"/>
  </node>
  <node id="30697" label="KTR94659_9002" cy:nodeId="1652">
    <graphics x="1463.760986328125" z="0.0" y="1853.2509765625"/>
  </node>
  <node id="30696" label="WP_084253025_1" cy:nodeId="1653">
    <graphics x="1289.1290283203125" z="0.0" y="1814.3194580078125"/>
  </node>
  <node id="30695" label="WP_058623611_2" cy:nodeId="1654">
    <graphics x="1504.7635498046875" z="0.0" y="1850.701904296875"/>
  </node>
  <node id="30694" label="WP_081323045_9002" cy:nodeId="1655">
    <graphics x="1562.6678466796875" z="0.0" y="1749.5826416015625"/>
  </node>
  <node id="30693" label="WP_106109992_1" cy:nodeId="1656">
    <graphics x="1420.6280517578125" z="0.0" y="1661.3878173828125"/>
  </node>
  <node id="30692" label="WP_053775076_1" cy:nodeId="1657">
    <graphics x="1510.5518798828125" z="0.0" y="1772.1458740234375"/>
  </node>
  <node id="30691" label="WP_081323045_2" cy:nodeId="1658">
    <graphics x="1488.115478515625" z="0.0" y="1691.678955078125"/>
  </node>
  <node id="30690" label="WP_053775070_3" cy:nodeId="1659">
    <graphics x="1564.098388671875" z="0.0" y="1794.701416015625"/>
  </node>
  <node id="30689" label="KTR94659_2" cy:nodeId="1660">
    <graphics x="1468.79736328125" z="0.0" y="1796.696533203125"/>
  </node>
  <node id="30688" label="WP_058623611_3" cy:nodeId="1661">
    <graphics x="1434.94482421875" z="0.0" y="1761.41015625"/>
  </node>
  <node id="30687" label="WP_106109998_1" cy:nodeId="1662">
    <graphics x="1373.8612060546875" z="0.0" y="1705.56982421875"/>
  </node>
  <node id="30686" label="WP_051268851_2" cy:nodeId="1663">
    <graphics x="1232.470703125" z="0.0" y="1509.41455078125"/>
  </node>
  <node id="30685" label="WP_051268851_1" cy:nodeId="1664">
    <graphics x="1314.2320556640625" z="0.0" y="1596.4415283203125"/>
  </node>
  <node id="30684" label="WP_064833209_3" cy:nodeId="1665">
    <graphics x="1420.74755859375" z="0.0" y="1818.2103271484375"/>
  </node>
  <node id="30683" label="WP_064833216_2" cy:nodeId="1666">
    <graphics x="1399.3394775390625" z="0.0" y="1784.5919189453125"/>
  </node>
  <node id="30682" label="WP_084253023_5" cy:nodeId="1667">
    <graphics x="1340.123046875" z="0.0" y="1897.7611083984375"/>
  </node>
  <node id="30681" label="AFV25483_2" cy:nodeId="1668">
    <graphics x="1780.70556640625" z="0.0" y="1528.96337890625"/>
  </node>
  <node id="30680" label="EMF50559_2" cy:nodeId="1669">
    <graphics x="1752.2418212890625" z="0.0" y="1612.8125"/>
  </node>
  <node id="30679" label="WP_019887079_1" cy:nodeId="1670">
    <graphics x="1731.425537109375" z="0.0" y="1509.41455078125"/>
  </node>
  <node id="30678" label="WP_059081288_2" cy:nodeId="1671">
    <graphics x="1782.408203125" z="0.0" y="1666.5975341796875"/>
  </node>
  <node id="30677" label="WP_013003263_1" cy:nodeId="1672">
    <graphics x="1822.8468017578125" z="0.0" y="1632.6986083984375"/>
  </node>
  <node id="30676" label="WP_109280200_2" cy:nodeId="1673">
    <graphics x="1682.456298828125" z="0.0" y="1593.986328125"/>
  </node>
  <node id="30675" label="AFU90402_2" cy:nodeId="1674">
    <graphics x="1753.1314697265625" z="0.0" y="1531.5780029296875"/>
  </node>
  <node id="30674" label="GAQ63669_2" cy:nodeId="1675">
    <graphics x="1759.2265625" z="0.0" y="1671.280517578125"/>
  </node>
  <node id="30673" label="EKX68557_2" cy:nodeId="1676">
    <graphics x="1725.3192138671875" z="0.0" y="1575.8255615234375"/>
  </node>
  <node id="30672" label="EKX68554_2" cy:nodeId="1677">
    <graphics x="1823.98828125" z="0.0" y="1541.539306640625"/>
  </node>
  <node id="30671" label="WP_048819674_2" cy:nodeId="1678">
    <graphics x="1823.9796142578125" z="0.0" y="1584.4500732421875"/>
  </node>
  <node id="30670" label="WP_109280137_2" cy:nodeId="1679">
    <graphics x="1664.098388671875" z="0.0" y="1587.2042236328125"/>
  </node>
  <node id="30669" label="WP_019549855_1" cy:nodeId="1680">
    <graphics x="1779.6419677734375" z="0.0" y="1573.85546875"/>
  </node>
  <node id="30668" label="WP_019887077_1" cy:nodeId="1681">
    <graphics x="1693.3251953125" z="0.0" y="1557.5863037109375"/>
  </node>
  <node id="30667" label="AFV25482_3" cy:nodeId="1682">
    <graphics x="1691.206787109375" z="0.0" y="1663.141357421875"/>
  </node>
  <node id="30666" label="WP_005486705_2" cy:nodeId="1683">
    <graphics x="1794.85302734375" z="0.0" y="1611.7813720703125"/>
  </node>
  <node id="30665" label="WP_059081255_2" cy:nodeId="1684">
    <graphics x="1691.816650390625" z="0.0" y="1528.7457275390625"/>
  </node>
  <node id="30664" label="WP_100243842_2" cy:nodeId="1685">
    <graphics x="1675.2576904296875" z="0.0" y="1617.9140625"/>
  </node>
  <node id="30663" label="WP_020115555_2" cy:nodeId="1686">
    <graphics x="1713.358642578125" z="0.0" y="1631.2611083984375"/>
  </node>
  <node id="30662" label="CBG72692_2" cy:nodeId="1687">
    <graphics x="1741.58642578125" z="0.0" y="1646.0826416015625"/>
  </node>
  <node id="30661" label="WP_084253023_4" cy:nodeId="1688">
    <graphics x="1062.781005859375" z="0.0" y="1509.41455078125"/>
  </node>
  <node id="30660" label="WP_136207038_4" cy:nodeId="1689">
    <graphics x="921.2850952148438" z="0.0" y="1787.5997314453125"/>
  </node>
  <node id="30659" label="OBA55656_2" cy:nodeId="1690">
    <graphics x="1107.823974609375" z="0.0" y="1777.937744140625"/>
  </node>
  <node id="30658" label="WP_064833209_1" cy:nodeId="1691">
    <graphics x="1014.95556640625" z="0.0" y="1819.6541748046875"/>
  </node>
  <node id="30657" label="WP_083926625_1" cy:nodeId="1692">
    <graphics x="1132.470703125" z="0.0" y="1538.208251953125"/>
  </node>
  <node id="30656" label="WP_113984581_1" cy:nodeId="1693">
    <graphics x="752.2424926757812" z="0.0" y="1651.0284423828125"/>
  </node>
  <node id="30655" label="WP_069774196_1" cy:nodeId="1694">
    <graphics x="769.4935302734375" z="0.0" y="1737.398193359375"/>
  </node>
  <node id="30654" label="ERS23150_1" cy:nodeId="1695">
    <graphics x="851.9022216796875" z="0.0" y="1677.8604736328125"/>
  </node>
  <node id="30653" label="WP_080564860_2" cy:nodeId="1696">
    <graphics x="873.5325317382812" z="0.0" y="1728.7999267578125"/>
  </node>
  <node id="30652" label="WP_125614105_4" cy:nodeId="1697">
    <graphics x="943.66015625" z="0.0" y="1543.1634521484375"/>
  </node>
  <node id="30651" label="WP_136207038_3" cy:nodeId="1698">
    <graphics x="1046.2576904296875" z="0.0" y="1706.3145751953125"/>
  </node>
  <node id="30650" label="EGE49931_1" cy:nodeId="1699">
    <graphics x="1071.9241943359375" z="0.0" y="1593.44482421875"/>
  </node>
  <node id="30649" label="WP_012360880_1" cy:nodeId="1700">
    <graphics x="1101.1627197265625" z="0.0" y="1666.8824462890625"/>
  </node>
  <node id="30648" label="AGL26862_2" cy:nodeId="1701">
    <graphics x="1048.1883544921875" z="0.0" y="1631.8699951171875"/>
  </node>
  <node id="30647" label="WP_124934048_1" cy:nodeId="1702">
    <graphics x="931.4264526367188" z="0.0" y="1600.3675537109375"/>
  </node>
  <node id="30646" label="WP_078590495_3" cy:nodeId="1703">
    <graphics x="951.4235229492188" z="0.0" y="1646.442138671875"/>
  </node>
  <node id="30645" label="KAU25380_1" cy:nodeId="1704">
    <graphics x="1018.5880126953125" z="0.0" y="1558.1844482421875"/>
  </node>
  <node id="30644" label="WP_131103335_1" cy:nodeId="1705">
    <graphics x="1000.49951171875" z="0.0" y="1681.2081298828125"/>
  </node>
  <node id="30643" label="KCR02833_1" cy:nodeId="1706">
    <graphics x="1007.6741943359375" z="0.0" y="1600.380859375"/>
  </node>
  <node id="30642" label="EGY78124_1" cy:nodeId="1707">
    <graphics x="849.486572265625" z="0.0" y="1621.5350341796875"/>
  </node>
  <node id="30641" label="CCB71037_3" cy:nodeId="1708">
    <graphics x="955.0828247070312" z="0.0" y="1689.812255859375"/>
  </node>
  <node id="30640" label="WP_136207038_1" cy:nodeId="1709">
    <graphics x="503.90057373046875" z="0.0" y="1674.084716796875"/>
  </node>
  <node id="30639" label="WP_094009173_2" cy:nodeId="1710">
    <graphics x="552.952880859375" z="0.0" y="1547.169677734375"/>
  </node>
  <node id="30638" label="WP_116154877_1" cy:nodeId="1711">
    <graphics x="462.4681396484375" z="0.0" y="1597.5308837890625"/>
  </node>
  <node id="30637" label="WP_101385752_1" cy:nodeId="1712">
    <graphics x="518.1495361328125" z="0.0" y="1628.841552734375"/>
  </node>
  <node id="30636" label="WP_123074529_1" cy:nodeId="1713">
    <graphics x="587.3902587890625" z="0.0" y="1607.1458740234375"/>
  </node>
  <node id="30635" label="KPC62607_1" cy:nodeId="1714">
    <graphics x="613.8889770507812" z="0.0" y="1545.7261962890625"/>
  </node>
  <node id="30634" label="WP_005477225_1" cy:nodeId="1715">
    <graphics x="599.6522827148438" z="0.0" y="1647.929443359375"/>
  </node>
  <node id="30633" label="EMF26273_1" cy:nodeId="1716">
    <graphics x="652.2424926757812" z="0.0" y="1590.36279296875"/>
  </node>
  <node id="30632" label="WP_079177123_1" cy:nodeId="1717">
    <graphics x="563.3179321289062" z="0.0" y="1682.334716796875"/>
  </node>
  <node id="30631" label="PKV33869_3" cy:nodeId="1718">
    <graphics x="613.2615966796875" z="0.0" y="1628.8150634765625"/>
  </node>
  <node id="30630" label="WP_023550873_1" cy:nodeId="1719">
    <graphics x="580.7069702148438" z="0.0" y="1629.267578125"/>
  </node>
  <node id="30629" label="WP_134664144_1" cy:nodeId="1720">
    <graphics x="444.5840148925781" z="0.0" y="1689.773193359375"/>
  </node>
  <node id="30628" label="WP_078971081_1" cy:nodeId="1721">
    <graphics x="561.957763671875" z="0.0" y="1566.1217041015625"/>
  </node>
  <node id="30627" label="WP_057608322_1" cy:nodeId="1722">
    <graphics x="537.1957397460938" z="0.0" y="1682.2177734375"/>
  </node>
  <node id="30626" label="WP_018522479_1" cy:nodeId="1723">
    <graphics x="608.8541259765625" z="0.0" y="1581.4010009765625"/>
  </node>
  <node id="30625" label="WP_099279259_1" cy:nodeId="1724">
    <graphics x="516.8139038085938" z="0.0" y="1577.5687255859375"/>
  </node>
  <node id="30624" label="RED74809_1" cy:nodeId="1725">
    <graphics x="499.6641845703125" z="0.0" y="1527.76806640625"/>
  </node>
  <node id="30623" label="WP_028441277_1" cy:nodeId="1726">
    <graphics x="439.00823974609375" z="0.0" y="1655.2310791015625"/>
  </node>
  <node id="30622" label="WP_129292093_1" cy:nodeId="1727">
    <graphics x="461.5098876953125" z="0.0" y="1641.6202392578125"/>
  </node>
  <node id="30621" label="WP_099887535_1" cy:nodeId="1728">
    <graphics x="462.26318359375" z="0.0" y="1569.61328125"/>
  </node>
  <node id="30620" label="OIJ88146_1" cy:nodeId="1729">
    <graphics x="499.22210693359375" z="0.0" y="1588.0762939453125"/>
  </node>
  <node id="30619" label="WP_053676554_2" cy:nodeId="1730">
    <graphics x="534.3464965820312" z="0.0" y="1649.391357421875"/>
  </node>
  <node id="30618" label="WP_069774196_2" cy:nodeId="1731">
    <graphics x="533.2835693359375" z="0.0" y="1509.41455078125"/>
  </node>
  <node id="30617" label="WP_030570393_1" cy:nodeId="1732">
    <graphics x="555.5158081054688" z="0.0" y="1553.5777587890625"/>
  </node>
  <node id="30616" label="WP_086702179_1" cy:nodeId="1733">
    <graphics x="605.5140991210938" z="0.0" y="1606.4114990234375"/>
  </node>
  <node id="30615" label="WP_050514186_3" cy:nodeId="1734">
    <graphics x="629.3184204101562" z="0.0" y="1637.773681640625"/>
  </node>
  <node id="30614" label="WP_107308000_1" cy:nodeId="1735">
    <graphics x="619.2305908203125" z="0.0" y="1697.00244140625"/>
  </node>
  <node id="30613" label="WP_124286732_1" cy:nodeId="1736">
    <graphics x="588.2322387695312" z="0.0" y="1555.9835205078125"/>
  </node>
  <node id="30612" label="WP_107307769_1" cy:nodeId="1737">
    <graphics x="524.1187744140625" z="0.0" y="1530.9423828125"/>
  </node>
  <node id="30611" label="WP_002518052_2" cy:nodeId="1738">
    <graphics x="339.00823974609375" z="0.0" y="1787.3721923828125"/>
  </node>
  <node id="30610" label="WP_040899039_9002" cy:nodeId="1739">
    <graphics x="46.34454345703125" z="0.0" y="1631.14111328125"/>
  </node>
  <node id="30609" label="AKJ11407_9005" cy:nodeId="1740">
    <graphics x="0.0" z="0.0" y="1648.02783203125"/>
  </node>
  <node id="30608" label="EJJ05688_9003" cy:nodeId="1741">
    <graphics x="137.30819702148438" z="0.0" y="1719.4615478515625"/>
  </node>
  <node id="30607" label="WP_131102102_9002" cy:nodeId="1742">
    <graphics x="82.29275512695312" z="0.0" y="1705.9100341796875"/>
  </node>
  <node id="30606" label="WP_017535900_9002" cy:nodeId="1743">
    <graphics x="218.24609375" z="0.0" y="1711.9688720703125"/>
  </node>
  <node id="30605" label="WP_051007002_1" cy:nodeId="1744">
    <graphics x="161.12527465820312" z="0.0" y="1728.77294921875"/>
  </node>
  <node id="30604" label="WP_030578068_9013" cy:nodeId="1745">
    <graphics x="144.25881958007812" z="0.0" y="1691.5159912109375"/>
  </node>
  <node id="30603" label="WP_073444401_9006" cy:nodeId="1746">
    <graphics x="13.99017333984375" z="0.0" y="1747.314453125"/>
  </node>
  <node id="30602" label="WP_067348529_9005" cy:nodeId="1747">
    <graphics x="88.60504150390625" z="0.0" y="1735.9285888671875"/>
  </node>
  <node id="30601" label="WP_014690715_9002" cy:nodeId="1748">
    <graphics x="174.04037475585938" z="0.0" y="1664.1038818359375"/>
  </node>
  <node id="30600" label="WP_093656413_2" cy:nodeId="1749">
    <graphics x="297.50018310546875" z="0.0" y="1585.8695068359375"/>
  </node>
  <node id="30599" label="WP_051709136_3" cy:nodeId="1750">
    <graphics x="166.77969360351562" z="0.0" y="1509.41455078125"/>
  </node>
  <node id="30598" label="WP_067348529_9006" cy:nodeId="1751">
    <graphics x="61.10845947265625" z="0.0" y="1675.6871337890625"/>
  </node>
  <node id="30597" label="WP_131097488_2" cy:nodeId="1752">
    <graphics x="201.8085174560547" z="0.0" y="1740.64404296875"/>
  </node>
  <node id="30596" label="QBI53056_9006" cy:nodeId="1753">
    <graphics x="182.22872924804688" z="0.0" y="1801.7415771484375"/>
  </node>
  <node id="30595" label="WP_120727774_9003" cy:nodeId="1754">
    <graphics x="178.5269775390625" z="0.0" y="1747.5458984375"/>
  </node>
  <node id="30594" label="OLO57000_9001" cy:nodeId="1755">
    <graphics x="191.79013061523438" z="0.0" y="1671.119384765625"/>
  </node>
  <node id="30593" label="OLO56996_1" cy:nodeId="1756">
    <graphics x="126.29379272460938" z="0.0" y="1600.9798583984375"/>
  </node>
  <node id="30592" label="WP_131097488_1" cy:nodeId="1757">
    <graphics x="59.718048095703125" z="0.0" y="1744.0146484375"/>
  </node>
  <node id="30591" label="WP_124934048_2" cy:nodeId="1758">
    <graphics x="120.05319213867188" z="0.0" y="1676.1123046875"/>
  </node>
  <node id="30590" label="EJJ05683_1" cy:nodeId="1759">
    <graphics x="97.12054443359375" z="0.0" y="1626.5458984375"/>
  </node>
  <node id="30589" label="WP_073444401_9009" cy:nodeId="1760">
    <graphics x="99.14987182617188" z="0.0" y="1798.9630126953125"/>
  </node>
  <node id="30588" label="WP_030578068_9010" cy:nodeId="1761">
    <graphics x="202.11009216308594" z="0.0" y="1698.7490234375"/>
  </node>
  <node id="30587" label="WP_124934052_9002" cy:nodeId="1762">
    <graphics x="90.91653442382812" z="0.0" y="1773.012451171875"/>
  </node>
  <node id="30586" label="WP_086561060_1" cy:nodeId="1763">
    <graphics x="152.31866455078125" z="0.0" y="1798.3011474609375"/>
  </node>
  <node id="30585" label="AKJ11412_1" cy:nodeId="1764">
    <graphics x="113.77944946289062" z="0.0" y="1755.7818603515625"/>
  </node>
  <node id="30584" label="WP_086561055_9001" cy:nodeId="1765">
    <graphics x="7.52349853515625" z="0.0" y="1704.857177734375"/>
  </node>
  <node id="30583" label="WP_131102102_9005" cy:nodeId="1766">
    <graphics x="156.44207763671875" z="0.0" y="1596.70556640625"/>
  </node>
  <node id="30582" label="WP_067348529_9007" cy:nodeId="1767">
    <graphics x="67.41152954101562" z="0.0" y="1682.2615966796875"/>
  </node>
  <node id="30581" label="QBI53056_9003" cy:nodeId="1768">
    <graphics x="149.22842407226562" z="0.0" y="1651.366455078125"/>
  </node>
  <node id="30580" label="WP_131965735_1" cy:nodeId="1769">
    <graphics x="5058.07177734375" z="0.0" y="180.01223754882812"/>
  </node>
  <node id="30579" label="WP_020218384_1" cy:nodeId="1770">
    <graphics x="5126.23291015625" z="0.0" y="132.17428588867188"/>
  </node>
  <node id="30578" label="WP_062428470_1" cy:nodeId="1771">
    <graphics x="5123.92041015625" z="0.0" y="100.72947692871094"/>
  </node>
  <node id="30577" label="WP_131965734_1" cy:nodeId="1772">
    <graphics x="5154.43212890625" z="0.0" y="54.46141052246094"/>
  </node>
  <node id="30576" label="WP_030455411_1" cy:nodeId="1773">
    <graphics x="5207.81884765625" z="0.0" y="141.03042602539062"/>
  </node>
  <node id="30575" label="WP_113982325_1" cy:nodeId="1774">
    <graphics x="5097.71728515625" z="0.0" y="130.17074584960938"/>
  </node>
  <node id="30574" label="WP_061300719_2" cy:nodeId="1775">
    <graphics x="5172.806640625" z="0.0" y="165.1978759765625"/>
  </node>
  <node id="30573" label="WP_030172139_2" cy:nodeId="1776">
    <graphics x="5162.19580078125" z="0.0" y="139.14456176757812"/>
  </node>
  <node id="30572" label="WP_111862862_2" cy:nodeId="1777">
    <graphics x="5139.6181640625" z="0.0" y="202.704345703125"/>
  </node>
  <node id="30571" label="WP_093170892_4" cy:nodeId="1778">
    <graphics x="5179.646484375" z="0.0" y="90.54165649414062"/>
  </node>
  <node id="30570" label="WP_062343135_1" cy:nodeId="1779">
    <graphics x="5138.7333984375" z="0.0" y="96.56719970703125"/>
  </node>
  <node id="30569" label="WP_030455409_1" cy:nodeId="1780">
    <graphics x="5121.2705078125" z="0.0" y="92.85691833496094"/>
  </node>
  <node id="30568" label="WP_062428474_1" cy:nodeId="1781">
    <graphics x="5080.376953125" z="0.0" y="98.8864517211914"/>
  </node>
  <node id="30567" label="WP_061300720_2" cy:nodeId="1782">
    <graphics x="5102.68701171875" z="0.0" y="32.084075927734375"/>
  </node>
  <node id="30566" label="WP_111169117_3" cy:nodeId="1783">
    <graphics x="5097.22314453125" z="0.0" y="0.0"/>
  </node>
  <node id="30565" label="WP_093170943_2" cy:nodeId="1784">
    <graphics x="5220.26953125" z="0.0" y="81.39207458496094"/>
  </node>
  <node id="30564" label="WP_116026137_3" cy:nodeId="1785">
    <graphics x="5207.6142578125" z="0.0" y="129.96966552734375"/>
  </node>
  <node id="30563" label="WP_061300721_2" cy:nodeId="1786">
    <graphics x="5091.7099609375" z="0.0" y="194.880126953125"/>
  </node>
  <node id="30562" label="WP_132388264_2" cy:nodeId="1787">
    <graphics x="5193.455078125" z="0.0" y="90.54576110839844"/>
  </node>
  <node id="30561" label="WP_113982324_1" cy:nodeId="1788">
    <graphics x="5071.8388671875" z="0.0" y="149.09860229492188"/>
  </node>
  <node id="30560" label="SDH11838_4" cy:nodeId="1789">
    <graphics x="5201.8466796875" z="0.0" y="192.1920166015625"/>
  </node>
  <node id="30559" label="WP_030455410_1" cy:nodeId="1790">
    <graphics x="5044.89013671875" z="0.0" y="53.80573272705078"/>
  </node>
  <node id="30558" label="WP_116026136_3" cy:nodeId="1791">
    <graphics x="5056.05029296875" z="0.0" y="102.4588623046875"/>
  </node>
  <node id="30557" label="WP_062428472_1" cy:nodeId="1792">
    <graphics x="5169.48828125" z="0.0" y="214.5554656982422"/>
  </node>
  <node id="30556" label="WP_132388266_2" cy:nodeId="1793">
    <graphics x="5163.9833984375" z="0.0" y="73.98291015625"/>
  </node>
  <node id="30555" label="WP_062343137_1" cy:nodeId="1794">
    <graphics x="5033.48095703125" z="0.0" y="89.39999389648438"/>
  </node>
  <node id="30554" label="WP_117401160_2" cy:nodeId="1795">
    <graphics x="5188.890625" z="0.0" y="61.28779602050781"/>
  </node>
  <node id="30553" label="WP_132268319_2" cy:nodeId="1796">
    <graphics x="5015.4091796875" z="0.0" y="153.63995361328125"/>
  </node>
  <node id="30552" label="WP_111862863_2" cy:nodeId="1797">
    <graphics x="5050.193359375" z="0.0" y="116.84072875976562"/>
  </node>
  <node id="30551" label="WP_030172142_2" cy:nodeId="1798">
    <graphics x="5127.91943359375" z="0.0" y="152.6317596435547"/>
  </node>
  <node id="30550" label="WP_117401161_2" cy:nodeId="1799">
    <graphics x="5077.78076171875" z="0.0" y="157.75259399414062"/>
  </node>
  <node id="30549" label="WP_132268317_2" cy:nodeId="1800">
    <graphics x="5107.32177734375" z="0.0" y="172.18038940429688"/>
  </node>
  <node id="30548" label="WP_020218383_1" cy:nodeId="1801">
    <graphics x="5148.96923828125" z="0.0" y="39.03105163574219"/>
  </node>
  <node id="30547" label="WP_065848698_1" cy:nodeId="1802">
    <graphics x="4776.49169921875" z="0.0" y="553.3658447265625"/>
  </node>
  <node id="30546" label="WP_039653092_1" cy:nodeId="1803">
    <graphics x="4781.2666015625" z="0.0" y="483.71905517578125"/>
  </node>
  <node id="30545" label="BAN83923_2" cy:nodeId="1804">
    <graphics x="4900.02099609375" z="0.0" y="583.1171264648438"/>
  </node>
  <node id="30544" label="WP_043911856_1" cy:nodeId="1805">
    <graphics x="4602.42578125" z="0.0" y="7.1522674560546875"/>
  </node>
  <node id="30543" label="WP_073735916_2" cy:nodeId="1806">
    <graphics x="4549.94189453125" z="0.0" y="106.12161254882812"/>
  </node>
  <node id="30542" label="WP_124271723_2" cy:nodeId="1807">
    <graphics x="4635.7490234375" z="0.0" y="147.00997924804688"/>
  </node>
  <node id="30541" label="RPK69291_2" cy:nodeId="1808">
    <graphics x="4562.6552734375" z="0.0" y="109.75440979003906"/>
  </node>
  <node id="30540" label="WP_061988205_1" cy:nodeId="1809">
    <graphics x="4516.3466796875" z="0.0" y="553.5441284179688"/>
  </node>
  <node id="30539" label="WP_076159164_4" cy:nodeId="1810">
    <graphics x="4611.20166015625" z="0.0" y="478.17340087890625"/>
  </node>
  <node id="30538" label="WP_035804978_2" cy:nodeId="1811">
    <graphics x="4721.7333984375" z="0.0" y="126.08961486816406"/>
  </node>
  <node id="30537" label="WP_073483171_2" cy:nodeId="1812">
    <graphics x="4709.7392578125" z="0.0" y="72.7282943725586"/>
  </node>
  <node id="30536" label="WP_031052551_1" cy:nodeId="1813">
    <graphics x="4582.23095703125" z="0.0" y="159.30661010742188"/>
  </node>
  <node id="30535" label="WP_130877472_3" cy:nodeId="1814">
    <graphics x="4668.58056640625" z="0.0" y="89.02201843261719"/>
  </node>
  <node id="30534" label="WP_107105767_1" cy:nodeId="1815">
    <graphics x="4653.0087890625" z="0.0" y="72.17666625976562"/>
  </node>
  <node id="30533" label="WP_116209352_2" cy:nodeId="1816">
    <graphics x="4644.7109375" z="0.0" y="0.0"/>
  </node>
  <node id="30532" label="WP_127149214_3" cy:nodeId="1817">
    <graphics x="4633.349609375" z="0.0" y="100.72769165039062"/>
  </node>
  <node id="30531" label="WP_046930162_5" cy:nodeId="1818">
    <graphics x="4557.9140625" z="0.0" y="161.85455322265625"/>
  </node>
  <node id="30530" label="WP_123082011_3" cy:nodeId="1819">
    <graphics x="4675.80322265625" z="0.0" y="44.52062225341797"/>
  </node>
  <node id="30529" label="WP_023544308_2" cy:nodeId="1820">
    <graphics x="4628.5927734375" z="0.0" y="221.04449462890625"/>
  </node>
  <node id="30528" label="WP_078859808_4" cy:nodeId="1821">
    <graphics x="4682.95068359375" z="0.0" y="165.64381408691406"/>
  </node>
  <node id="30527" label="WP_073787016_1" cy:nodeId="1822">
    <graphics x="4528.7080078125" z="0.0" y="83.04853820800781"/>
  </node>
  <node id="30526" label="WP_125511014_1" cy:nodeId="1823">
    <graphics x="4746.2744140625" z="0.0" y="67.55137634277344"/>
  </node>
  <node id="30525" label="WP_127176619_1" cy:nodeId="1824">
    <graphics x="4598.94140625" z="0.0" y="39.172332763671875"/>
  </node>
  <node id="30524" label="WP_128508010_2" cy:nodeId="1825">
    <graphics x="4601.12158203125" z="0.0" y="84.22190856933594"/>
  </node>
  <node id="30523" label="WP_081983063_6" cy:nodeId="1826">
    <graphics x="4592.3408203125" z="0.0" y="181.6967010498047"/>
  </node>
  <node id="30522" label="WP_078593643_1" cy:nodeId="1827">
    <graphics x="4600.3251953125" z="0.0" y="40.87886047363281"/>
  </node>
  <node id="30521" label="WP_115912935_2" cy:nodeId="1828">
    <graphics x="4637.1943359375" z="0.0" y="201.83682250976562"/>
  </node>
  <node id="30520" label="WP_099282405_1" cy:nodeId="1829">
    <graphics x="4566.8994140625" z="0.0" y="32.82787322998047"/>
  </node>
  <node id="30519" label="WP_093545912_1" cy:nodeId="1830">
    <graphics x="4660.962890625" z="0.0" y="174.07192993164062"/>
  </node>
  <node id="30518" label="WP_106236748_1" cy:nodeId="1831">
    <graphics x="4813.814453125" z="0.0" y="532.2742309570312"/>
  </node>
  <node id="30517" label="WP_091117929_1" cy:nodeId="1832">
    <graphics x="4827.150390625" z="0.0" y="421.0977783203125"/>
  </node>
  <node id="30516" label="WP_071375573_1" cy:nodeId="1833">
    <graphics x="4915.4091796875" z="0.0" y="516.8270263671875"/>
  </node>
  <node id="30515" label="WP_030193566_1" cy:nodeId="1834">
    <graphics x="4893.43798828125" z="0.0" y="463.2692565917969"/>
  </node>
  <node id="30514" label="WP_017595616_2" cy:nodeId="1835">
    <graphics x="4845.13232421875" z="0.0" y="569.5628051757812"/>
  </node>
  <node id="30513" label="WP_018962008_1" cy:nodeId="1836">
    <graphics x="4840.23095703125" z="0.0" y="464.7743225097656"/>
  </node>
  <node id="30512" label="WP_131980226_1" cy:nodeId="1837">
    <graphics x="4708.833984375" z="0.0" y="493.3778076171875"/>
  </node>
  <node id="30511" label="WP_027655653_1" cy:nodeId="1838">
    <graphics x="4740.0576171875" z="0.0" y="407.05426025390625"/>
  </node>
  <node id="30510" label="WP_101404757_4" cy:nodeId="1839">
    <graphics x="4050.19970703125" z="0.0" y="349.55072021484375"/>
  </node>
  <node id="30509" label="WP_086861034_3" cy:nodeId="1840">
    <graphics x="3691.1103515625" z="0.0" y="0.0"/>
  </node>
  <node id="30508" label="WP_028441277_4" cy:nodeId="1841">
    <graphics x="3684.233642578125" z="0.0" y="367.7532958984375"/>
  </node>
  <node id="30507" label="WP_086702179_2" cy:nodeId="1842">
    <graphics x="3688.163818359375" z="0.0" y="196.62693786621094"/>
  </node>
  <node id="30506" label="WP_101385752_2" cy:nodeId="1843">
    <graphics x="3671.814453125" z="0.0" y="167.66932678222656"/>
  </node>
  <node id="30505" label="WP_103341360_4" cy:nodeId="1844">
    <graphics x="4259.89697265625" z="0.0" y="301.5918884277344"/>
  </node>
  <node id="30504" label="WP_057608322_2" cy:nodeId="1845">
    <graphics x="3624.1953125" z="0.0" y="257.75421142578125"/>
  </node>
  <node id="30503" label="PKV33869_4" cy:nodeId="1846">
    <graphics x="3823.79345703125" z="0.0" y="310.35260009765625"/>
  </node>
  <node id="30502" label="WP_030570393_2" cy:nodeId="1847">
    <graphics x="3756.1953125" z="0.0" y="124.94903564453125"/>
  </node>
  <node id="30501" label="WP_129292093_3" cy:nodeId="1848">
    <graphics x="3749.990478515625" z="0.0" y="276.25311279296875"/>
  </node>
  <node id="30500" label="WP_134664144_3" cy:nodeId="1849">
    <graphics x="3767.788818359375" z="0.0" y="204.90769958496094"/>
  </node>
  <node id="30499" label="RED74809_5" cy:nodeId="1850">
    <graphics x="3795.2080078125" z="0.0" y="301.422607421875"/>
  </node>
  <node id="30498" label="WP_116154877_5" cy:nodeId="1851">
    <graphics x="3719.695068359375" z="0.0" y="383.92156982421875"/>
  </node>
  <node id="30497" label="WP_018522479_4" cy:nodeId="1852">
    <graphics x="3709.86083984375" z="0.0" y="259.4829406738281"/>
  </node>
  <node id="30496" label="WP_023550873_8" cy:nodeId="1853">
    <graphics x="3871.29296875" z="0.0" y="248.3511962890625"/>
  </node>
  <node id="30495" label="WP_087885333_3" cy:nodeId="1854">
    <graphics x="3934.9072265625" z="0.0" y="327.2860412597656"/>
  </node>
  <node id="30494" label="WP_059190156_3" cy:nodeId="1855">
    <graphics x="4110.27294921875" z="0.0" y="310.76080322265625"/>
  </node>
  <node id="30493" label="WP_097276114_2" cy:nodeId="1856">
    <graphics x="4112.154296875" z="0.0" y="234.96690368652344"/>
  </node>
  <node id="30492" label="WP_111415595_2" cy:nodeId="1857">
    <graphics x="4404.0986328125" z="0.0" y="279.66143798828125"/>
  </node>
  <node id="30491" label="WP_131735418_3" cy:nodeId="1858">
    <graphics x="4416.3466796875" z="0.0" y="347.34246826171875"/>
  </node>
  <node id="30490" label="WP_030040480_3" cy:nodeId="1859">
    <graphics x="4336.72412109375" z="0.0" y="255.89633178710938"/>
  </node>
  <node id="30489" label="WP_037881970_1" cy:nodeId="1860">
    <graphics x="4300.380859375" z="0.0" y="381.5735778808594"/>
  </node>
  <node id="30488" label="WP_088799362_1" cy:nodeId="1861">
    <graphics x="4369.45751953125" z="0.0" y="397.1566467285156"/>
  </node>
  <node id="30487" label="WP_053747924_2" cy:nodeId="1862">
    <graphics x="4337.02099609375" z="0.0" y="324.5122375488281"/>
  </node>
  <node id="30486" label="WP_123074529_6" cy:nodeId="1863">
    <graphics x="3639.90234375" z="0.0" y="218.81515502929688"/>
  </node>
  <node id="30485" label="WP_057611617_6" cy:nodeId="1864">
    <graphics x="3927.120849609375" z="0.0" y="156.5576629638672"/>
  </node>
  <node id="30484" label="WP_018568344_1" cy:nodeId="1865">
    <graphics x="4052.4267578125" z="0.0" y="88.54177856445312"/>
  </node>
  <node id="30483" label="WP_006347379_2" cy:nodeId="1866">
    <graphics x="3921.758056640625" z="0.0" y="111.77523803710938"/>
  </node>
  <node id="30482" label="WP_023554016_2" cy:nodeId="1867">
    <graphics x="3982.9599609375" z="0.0" y="56.20147705078125"/>
  </node>
  <node id="30481" label="WP_030065831_1" cy:nodeId="1868">
    <graphics x="3993.302490234375" z="0.0" y="132.06195068359375"/>
  </node>
  <node id="30480" label="WP_093603917_1" cy:nodeId="1869">
    <graphics x="4022.08642578125" z="0.0" y="201.25047302246094"/>
  </node>
  <node id="30479" label="WP_007495061_2" cy:nodeId="1870">
    <graphics x="4068.1689453125" z="0.0" y="146.19284057617188"/>
  </node>
  <node id="30478" label="GAQ65395_3" cy:nodeId="1871">
    <graphics x="3676.483642578125" z="0.0" y="209.3059539794922"/>
  </node>
  <node id="30477" label="WP_059082757_2" cy:nodeId="1872">
    <graphics x="3714.72265625" z="0.0" y="216.51885986328125"/>
  </node>
  <node id="30476" label="WP_086861034_1" cy:nodeId="1873">
    <graphics x="3727.768798828125" z="0.0" y="80.5450439453125"/>
  </node>
  <node id="30475" label="WP_099279259_2" cy:nodeId="1874">
    <graphics x="3791.47412109375" z="0.0" y="247.693603515625"/>
  </node>
  <node id="30474" label="WP_078971081_2" cy:nodeId="1875">
    <graphics x="3804.693359375" z="0.0" y="266.7657470703125"/>
  </node>
  <node id="30473" label="WP_124286732_5" cy:nodeId="1876">
    <graphics x="3820.43701171875" z="0.0" y="303.1504211425781"/>
  </node>
  <node id="30472" label="WP_107308000_3" cy:nodeId="1877">
    <graphics x="3705.209228515625" z="0.0" y="177.6149139404297"/>
  </node>
  <node id="30471" label="WP_053676554_4" cy:nodeId="1878">
    <graphics x="3822.234375" z="0.0" y="159.2036895751953"/>
  </node>
  <node id="30470" label="OIJ88146_3" cy:nodeId="1879">
    <graphics x="3721.65625" z="0.0" y="201.80584716796875"/>
  </node>
  <node id="30469" label="WP_094009173_3" cy:nodeId="1880">
    <graphics x="3844.73486328125" z="0.0" y="197.69163513183594"/>
  </node>
  <node id="30468" label="WP_079177123_3" cy:nodeId="1881">
    <graphics x="3722.283935546875" z="0.0" y="128.61849975585938"/>
  </node>
  <node id="30467" label="KPC62607_2" cy:nodeId="1882">
    <graphics x="3799.150390625" z="0.0" y="227.7732696533203"/>
  </node>
  <node id="30466" label="WP_005477225_2" cy:nodeId="1883">
    <graphics x="3801.61083984375" z="0.0" y="223.7462158203125"/>
  </node>
  <node id="30465" label="WP_099887535_4" cy:nodeId="1884">
    <graphics x="3697.484619140625" z="0.0" y="272.9845886230469"/>
  </node>
  <node id="30464" label="WP_085671318_2" cy:nodeId="1885">
    <graphics x="3161.145263671875" z="0.0" y="261.90692138671875"/>
  </node>
  <node id="30463" label="WP_085671453_2" cy:nodeId="1886">
    <graphics x="3105.330810546875" z="0.0" y="191.492919921875"/>
  </node>
  <node id="30462" label="VDM88753_2" cy:nodeId="1887">
    <graphics x="3278.757568359375" z="0.0" y="217.0423583984375"/>
  </node>
  <node id="30461" label="WP_083115866_3" cy:nodeId="1888">
    <graphics x="3373.033203125" z="0.0" y="268.2574768066406"/>
  </node>
  <node id="30460" label="WP_085671380_1" cy:nodeId="1889">
    <graphics x="3450.259033203125" z="0.0" y="144.95211791992188"/>
  </node>
  <node id="30459" label="EGB29232_2" cy:nodeId="1890">
    <graphics x="3505.442138671875" z="0.0" y="165.88839721679688"/>
  </node>
  <node id="30458" label="WP_065164254_3" cy:nodeId="1891">
    <graphics x="3318.773681640625" z="0.0" y="76.62955474853516"/>
  </node>
  <node id="30457" label="CFR67737_1" cy:nodeId="1892">
    <graphics x="3448.96484375" z="0.0" y="99.77506256103516"/>
  </node>
  <node id="30456" label="EGE49931_2" cy:nodeId="1893">
    <graphics x="3486.93212890625" z="0.0" y="142.914794921875"/>
  </node>
  <node id="30455" label="WP_085673955_2" cy:nodeId="1894">
    <graphics x="3315.2119140625" z="0.0" y="253.56024169921875"/>
  </node>
  <node id="30454" label="WP_085670073_3" cy:nodeId="1895">
    <graphics x="3314.046630859375" z="0.0" y="14.417411804199219"/>
  </node>
  <node id="30453" label="ORW98956_1" cy:nodeId="1896">
    <graphics x="3429.274169921875" z="0.0" y="308.05767822265625"/>
  </node>
  <node id="30452" label="KCR02833_2" cy:nodeId="1897">
    <graphics x="3425.359130859375" z="0.0" y="28.628273010253906"/>
  </node>
  <node id="30451" label="ORA12704_3" cy:nodeId="1898">
    <graphics x="3337.916015625" z="0.0" y="292.9964599609375"/>
  </node>
  <node id="30450" label="WP_085673083_1" cy:nodeId="1899">
    <graphics x="3209.28076171875" z="0.0" y="131.05429077148438"/>
  </node>
  <node id="30449" label="COV81994_3" cy:nodeId="1900">
    <graphics x="3524.1953125" z="0.0" y="116.40200805664062"/>
  </node>
  <node id="30448" label="COV23412_2" cy:nodeId="1901">
    <graphics x="3440.317626953125" z="0.0" y="63.43535614013672"/>
  </node>
  <node id="30447" label="WP_086155057_2" cy:nodeId="1902">
    <graphics x="3487.98779296875" z="0.0" y="7.956077575683594"/>
  </node>
  <node id="30446" label="AKR01079_2" cy:nodeId="1903">
    <graphics x="3461.926025390625" z="0.0" y="90.7639389038086"/>
  </node>
  <node id="30445" label="OOK83994_3" cy:nodeId="1904">
    <graphics x="3145.13720703125" z="0.0" y="219.94561767578125"/>
  </node>
  <node id="30444" label="WP_122530149_2" cy:nodeId="1905">
    <graphics x="3126.630126953125" z="0.0" y="272.8492431640625"/>
  </node>
  <node id="30443" label="WP_051490166_1" cy:nodeId="1906">
    <graphics x="3284.90234375" z="0.0" y="399.1100769042969"/>
  </node>
  <node id="30442" label="WP_083102943_2" cy:nodeId="1907">
    <graphics x="3193.130126953125" z="0.0" y="342.8453063964844"/>
  </node>
  <node id="30441" label="EUA05503_2" cy:nodeId="1908">
    <graphics x="3160.43798828125" z="0.0" y="315.9930725097656"/>
  </node>
  <node id="30440" label="WP_085252934_2" cy:nodeId="1909">
    <graphics x="3235.23291015625" z="0.0" y="312.54730224609375"/>
  </node>
  <node id="30439" label="WP_085105271_2" cy:nodeId="1910">
    <graphics x="3155.745361328125" z="0.0" y="333.4999694824219"/>
  </node>
  <node id="30438" label="WP_083115648_2" cy:nodeId="1911">
    <graphics x="3286.049072265625" z="0.0" y="313.595703125"/>
  </node>
  <node id="30437" label="WP_031737334_2" cy:nodeId="1912">
    <graphics x="3377.028564453125" z="0.0" y="69.29561614990234"/>
  </node>
  <node id="30436" label="WP_023370892_2" cy:nodeId="1913">
    <graphics x="2663.55029296875" z="0.0" y="138.59091186523438"/>
  </node>
  <node id="30435" label="OOK66964_1" cy:nodeId="1914">
    <graphics x="2701.900146484375" z="0.0" y="0.0"/>
  </node>
  <node id="30434" label="WP_085673955_3" cy:nodeId="1915">
    <graphics x="3201.63818359375" z="0.0" y="202.89694213867188"/>
  </node>
  <node id="30433" label="WP_085673959_2" cy:nodeId="1916">
    <graphics x="3196.603271484375" z="0.0" y="166.13485717773438"/>
  </node>
  <node id="30432" label="WP_085670625_2" cy:nodeId="1917">
    <graphics x="3256.884765625" z="0.0" y="235.64230346679688"/>
  </node>
  <node id="30431" label="WP_083113299_3" cy:nodeId="1918">
    <graphics x="3222.254638671875" z="0.0" y="216.47445678710938"/>
  </node>
  <node id="30430" label="WP_065136618_3" cy:nodeId="1919">
    <graphics x="3200.957763671875" z="0.0" y="66.71874237060547"/>
  </node>
  <node id="30429" label="COV92604_2" cy:nodeId="1920">
    <graphics x="3523.38232421875" z="0.0" y="222.50424194335938"/>
  </node>
  <node id="30428" label="WP_075911259_2" cy:nodeId="1921">
    <graphics x="3347.306640625" z="0.0" y="65.82898712158203"/>
  </node>
  <node id="30427" label="CFS33831_2" cy:nodeId="1922">
    <graphics x="3492.35205078125" z="0.0" y="100.05095672607422"/>
  </node>
  <node id="30426" label="KAU25380_2" cy:nodeId="1923">
    <graphics x="3474.25341796875" z="0.0" y="56.59461212158203"/>
  </node>
  <node id="30425" label="WP_083115253_1" cy:nodeId="1924">
    <graphics x="3268.1845703125" z="0.0" y="33.22657012939453"/>
  </node>
  <node id="30424" label="ORC04864_1" cy:nodeId="1925">
    <graphics x="3242.5615234375" z="0.0" y="262.8001403808594"/>
  </node>
  <node id="30423" label="WP_082275447_2" cy:nodeId="1926">
    <graphics x="3199.9072265625" z="0.0" y="260.1095886230469"/>
  </node>
  <node id="30422" label="ODR23958_5" cy:nodeId="1927">
    <graphics x="3350.88427734375" z="0.0" y="98.41851043701172"/>
  </node>
  <node id="30421" label="AUS50474_3" cy:nodeId="1928">
    <graphics x="3427.8876953125" z="0.0" y="68.62882232666016"/>
  </node>
  <node id="30420" label="CKX97298_2" cy:nodeId="1929">
    <graphics x="3356.6044921875" z="0.0" y="45.87847137451172"/>
  </node>
  <node id="30419" label="WP_067240547_1" cy:nodeId="1930">
    <graphics x="3334.185791015625" z="0.0" y="149.31661987304688"/>
  </node>
  <node id="30418" label="WP_065136618_2" cy:nodeId="1931">
    <graphics x="3306.03125" z="0.0" y="131.16043090820312"/>
  </node>
  <node id="30417" label="SGD85762_2" cy:nodeId="1932">
    <graphics x="3415.744140625" z="0.0" y="116.85006713867188"/>
  </node>
  <node id="30416" label="WP_085670073_2" cy:nodeId="1933">
    <graphics x="3380.208251953125" z="0.0" y="205.03579711914062"/>
  </node>
  <node id="30415" label="WP_085249702_4" cy:nodeId="1934">
    <graphics x="3362.6015625" z="0.0" y="141.67913818359375"/>
  </node>
  <node id="30414" label="WP_079099227_2" cy:nodeId="1935">
    <graphics x="3456.456787109375" z="0.0" y="60.493492126464844"/>
  </node>
  <node id="30413" label="WP_122441228_2" cy:nodeId="1936">
    <graphics x="2812.93603515625" z="0.0" y="112.55520629882812"/>
  </node>
  <node id="30412" label="WP_065136618_4" cy:nodeId="1937">
    <graphics x="3327.9052734375" z="0.0" y="91.67699432373047"/>
  </node>
  <node id="30411" label="WP_083271029_3" cy:nodeId="1938">
    <graphics x="3422.62548828125" z="0.0" y="161.85110473632812"/>
  </node>
  <node id="30410" label="WP_133437797_3" cy:nodeId="1939">
    <graphics x="3221.629638671875" z="0.0" y="143.414794921875"/>
  </node>
  <node id="30409" label="WP_085160326_2" cy:nodeId="1940">
    <graphics x="3238.63818359375" z="0.0" y="120.9332275390625"/>
  </node>
  <node id="30408" label="WP_085323284_3" cy:nodeId="1941">
    <graphics x="3352.4814453125" z="0.0" y="224.81076049804688"/>
  </node>
  <node id="30407" label="WP_055578070_4" cy:nodeId="1942">
    <graphics x="3378.10693359375" z="0.0" y="216.65414428710938"/>
  </node>
  <node id="30406" label="WP_023370892_3" cy:nodeId="1943">
    <graphics x="2723.323974609375" z="0.0" y="51.57744598388672"/>
  </node>
  <node id="30405" label="OOK66964_3" cy:nodeId="1944">
    <graphics x="2639.6806640625" z="0.0" y="85.2386703491211"/>
  </node>
  <node id="30404" label="EUA04475_2" cy:nodeId="1945">
    <graphics x="2654.02880859375" z="0.0" y="32.20881652832031"/>
  </node>
  <node id="30403" label="OOK63274_3" cy:nodeId="1946">
    <graphics x="2699.938232421875" z="0.0" y="98.0442123413086"/>
  </node>
  <node id="30402" label="OOK63274_4" cy:nodeId="1947">
    <graphics x="2761.50341796875" z="0.0" y="114.272216796875"/>
  </node>
  <node id="30401" label="WP_063469930_1" cy:nodeId="1948">
    <graphics x="2719.577880859375" z="0.0" y="155.86721801757812"/>
  </node>
  <node id="30400" label="WP_085250966_3" cy:nodeId="1949">
    <graphics x="2787.43896484375" z="0.0" y="59.98188018798828"/>
  </node>
  <node id="30399" label="EUA04475_1" cy:nodeId="1950">
    <graphics x="2756.02685546875" z="0.0" y="10.033546447753906"/>
  </node>
  <node id="30398" label="WP_085673959_1" cy:nodeId="1951">
    <graphics x="3278.704345703125" z="0.0" y="296.89691162109375"/>
  </node>
  <node id="30397" label="ODR23958_3" cy:nodeId="1952">
    <graphics x="3401.03076171875" z="0.0" y="142.1839599609375"/>
  </node>
  <node id="30396" label="ODR23958_4" cy:nodeId="1953">
    <graphics x="3177.0625" z="0.0" y="116.58441162109375"/>
  </node>
  <node id="30395" label="OMC50887_2" cy:nodeId="1954">
    <graphics x="3358.51611328125" z="0.0" y="256.4045715332031"/>
  </node>
  <node id="30394" label="WP_083271029_5" cy:nodeId="1955">
    <graphics x="3405.98291015625" z="0.0" y="165.71871948242188"/>
  </node>
  <node id="30393" label="OMC41183_2" cy:nodeId="1956">
    <graphics x="3313.80126953125" z="0.0" y="78.41666412353516"/>
  </node>
  <node id="30392" label="WP_083271029_4" cy:nodeId="1957">
    <graphics x="3153.607421875" z="0.0" y="138.74453735351562"/>
  </node>
  <node id="30391" label="WP_083046415_2" cy:nodeId="1958">
    <graphics x="3363.736328125" z="0.0" y="172.718017578125"/>
  </node>
  <node id="30390" label="RUP01435_4" cy:nodeId="1959">
    <graphics x="3401.345703125" z="0.0" y="173.077392578125"/>
  </node>
  <node id="30389" label="WP_083679341_2" cy:nodeId="1960">
    <graphics x="3311.873291015625" z="0.0" y="188.06271362304688"/>
  </node>
  <node id="30388" label="WP_018500447_3" cy:nodeId="1961">
    <graphics x="2144.896728515625" z="0.0" y="219.83999633789062"/>
  </node>
  <node id="30387" label="WP_082115047_1" cy:nodeId="1962">
    <graphics x="1839.72314453125" z="0.0" y="513.1041259765625"/>
  </node>
  <node id="30386" label="WP_107778339_2" cy:nodeId="1963">
    <graphics x="1777.555419921875" z="0.0" y="372.6090087890625"/>
  </node>
  <node id="30385" label="WP_091325076_3" cy:nodeId="1964">
    <graphics x="2421.372314453125" z="0.0" y="400.138427734375"/>
  </node>
  <node id="30384" label="WP_129283158_5" cy:nodeId="1965">
    <graphics x="2366.6708984375" z="0.0" y="250.08297729492188"/>
  </node>
  <node id="30383" label="WP_125792333_2" cy:nodeId="1966">
    <graphics x="1813.5062255859375" z="0.0" y="651.2733154296875"/>
  </node>
  <node id="30382" label="SFK92414_2" cy:nodeId="1967">
    <graphics x="1897.06884765625" z="0.0" y="711.5844116210938"/>
  </node>
  <node id="30381" label="WP_093601012_3" cy:nodeId="1968">
    <graphics x="1982.592041015625" z="0.0" y="564.2496337890625"/>
  </node>
  <node id="30380" label="WP_129176857_2" cy:nodeId="1969">
    <graphics x="2140.34912109375" z="0.0" y="41.50139236450195"/>
  </node>
  <node id="30379" label="WP_015618321_4" cy:nodeId="1970">
    <graphics x="1961.76123046875" z="0.0" y="278.91949462890625"/>
  </node>
  <node id="30378" label="WP_015618321_6" cy:nodeId="1971">
    <graphics x="2160.7314453125" z="0.0" y="474.5579833984375"/>
  </node>
  <node id="30377" label="WP_127571148_2" cy:nodeId="1972">
    <graphics x="1936.7435302734375" z="0.0" y="335.27777099609375"/>
  </node>
  <node id="30376" label="WP_097165202_3" cy:nodeId="1973">
    <graphics x="2393.201904296875" z="0.0" y="0.0"/>
  </node>
  <node id="30375" label="WP_026542026_1" cy:nodeId="1974">
    <graphics x="2448.69091796875" z="0.0" y="287.802734375"/>
  </node>
  <node id="30374" label="WP_107778338_2" cy:nodeId="1975">
    <graphics x="1795.7841796875" z="0.0" y="459.05731201171875"/>
  </node>
  <node id="30373" label="WP_028265499_2" cy:nodeId="1976">
    <graphics x="2334.22119140625" z="0.0" y="479.6839599609375"/>
  </node>
  <node id="30372" label="WP_031072263_3" cy:nodeId="1977">
    <graphics x="2088.229248046875" z="0.0" y="243.53195190429688"/>
  </node>
  <node id="30371" label="WP_043470682_3" cy:nodeId="1978">
    <graphics x="2434.7099609375" z="0.0" y="262.501708984375"/>
  </node>
  <node id="30370" label="AFR30485_2" cy:nodeId="1979">
    <graphics x="2230.95703125" z="0.0" y="329.61883544921875"/>
  </node>
  <node id="30369" label="WP_043470682_2" cy:nodeId="1980">
    <graphics x="2313.896728515625" z="0.0" y="356.31707763671875"/>
  </node>
  <node id="30368" label="WP_015618321_3" cy:nodeId="1981">
    <graphics x="1976.5758056640625" z="0.0" y="309.75457763671875"/>
  </node>
  <node id="30367" label="WP_076825825_3" cy:nodeId="1982">
    <graphics x="2223.71875" z="0.0" y="275.3214416503906"/>
  </node>
  <node id="30366" label="WP_091273394_1" cy:nodeId="1983">
    <graphics x="2246.349853515625" z="0.0" y="234.13201904296875"/>
  </node>
  <node id="30365" label="WP_076825825_1" cy:nodeId="1984">
    <graphics x="2197.069580078125" z="0.0" y="171.09066772460938"/>
  </node>
  <node id="30364" label="WP_091273394_3" cy:nodeId="1985">
    <graphics x="2254.13232421875" z="0.0" y="189.936767578125"/>
  </node>
  <node id="30363" label="WP_031072263_6" cy:nodeId="1986">
    <graphics x="2129.63037109375" z="0.0" y="137.61155700683594"/>
  </node>
  <node id="30362" label="WP_015618321_7" cy:nodeId="1987">
    <graphics x="2133.0732421875" z="0.0" y="461.5020751953125"/>
  </node>
  <node id="30361" label="WP_131746916_2" cy:nodeId="1988">
    <graphics x="2152.8349609375" z="0.0" y="263.4879455566406"/>
  </node>
  <node id="30360" label="WP_018500447_4" cy:nodeId="1989">
    <graphics x="2161.7236328125" z="0.0" y="157.4975128173828"/>
  </node>
  <node id="30359" label="WP_031072263_2" cy:nodeId="1990">
    <graphics x="2168.181396484375" z="0.0" y="117.23426818847656"/>
  </node>
  <node id="30358" label="WP_104263679_5" cy:nodeId="1991">
    <graphics x="2539.6806640625" z="0.0" y="169.73219299316406"/>
  </node>
  <node id="30357" label="WP_097165202_5" cy:nodeId="1992">
    <graphics x="2501.048095703125" z="0.0" y="39.257896423339844"/>
  </node>
  <node id="30356" label="WP_091470208_1" cy:nodeId="1993">
    <graphics x="2381.41552734375" z="0.0" y="468.98431396484375"/>
  </node>
  <node id="30355" label="WP_105691909_2" cy:nodeId="1994">
    <graphics x="2397.50390625" z="0.0" y="245.5438232421875"/>
  </node>
  <node id="30354" label="WP_094737915_2" cy:nodeId="1995">
    <graphics x="2160.685791015625" z="0.0" y="348.8834533691406"/>
  </node>
  <node id="30353" label="WP_089596247_3" cy:nodeId="1996">
    <graphics x="2333.19384765625" z="0.0" y="443.235595703125"/>
  </node>
  <node id="30352" label="WP_091470208_3" cy:nodeId="1997">
    <graphics x="2334.067626953125" z="0.0" y="331.22198486328125"/>
  </node>
  <node id="30351" label="WP_078909294_3" cy:nodeId="1998">
    <graphics x="2023.9637451171875" z="0.0" y="337.4130554199219"/>
  </node>
  <node id="30350" label="WP_015618321_2" cy:nodeId="1999">
    <graphics x="2053.428466796875" z="0.0" y="323.9505615234375"/>
  </node>
  <node id="30349" label="WP_031012255_5" cy:nodeId="2000">
    <graphics x="1999.752685546875" z="0.0" y="316.5650939941406"/>
  </node>
  <node id="30348" label="WP_129176857_4" cy:nodeId="2001">
    <graphics x="2135.73193359375" z="0.0" y="181.74972534179688"/>
  </node>
  <node id="30347" label="WP_129283158_4" cy:nodeId="2002">
    <graphics x="2259.498779296875" z="0.0" y="480.1972961425781"/>
  </node>
  <node id="30346" label="WP_091273394_2" cy:nodeId="2003">
    <graphics x="2257.250732421875" z="0.0" y="205.9629669189453"/>
  </node>
  <node id="30345" label="WP_091273394_5" cy:nodeId="2004">
    <graphics x="2164.259521484375" z="0.0" y="255.67465209960938"/>
  </node>
  <node id="30344" label="WP_031072263_4" cy:nodeId="2005">
    <graphics x="2172.1826171875" z="0.0" y="314.86602783203125"/>
  </node>
  <node id="30343" label="WP_116246380_4" cy:nodeId="2006">
    <graphics x="2170.925537109375" z="0.0" y="301.57574462890625"/>
  </node>
  <node id="30342" label="WP_061783869_3" cy:nodeId="2007">
    <graphics x="2054.478515625" z="0.0" y="402.7189636230469"/>
  </node>
  <node id="30341" label="WP_062071474_3" cy:nodeId="2008">
    <graphics x="2419.452392578125" z="0.0" y="345.16790771484375"/>
  </node>
  <node id="30340" label="WP_028265499_3" cy:nodeId="2009">
    <graphics x="2296.181396484375" z="0.0" y="250.25897216796875"/>
  </node>
  <node id="30339" label="WP_024818115_2" cy:nodeId="2010">
    <graphics x="2323.94921875" z="0.0" y="321.8929138183594"/>
  </node>
  <node id="30338" label="WP_116246380_3" cy:nodeId="2011">
    <graphics x="2076.366943359375" z="0.0" y="349.66790771484375"/>
  </node>
  <node id="30337" label="WP_078909294_2" cy:nodeId="2012">
    <graphics x="2075.409423828125" z="0.0" y="425.1400451660156"/>
  </node>
  <node id="30336" label="WP_121405200_1" cy:nodeId="2013">
    <graphics x="2138.572998046875" z="0.0" y="362.3770751953125"/>
  </node>
  <node id="30335" label="WP_061783869_4" cy:nodeId="2014">
    <graphics x="2089.888427734375" z="0.0" y="343.78167724609375"/>
  </node>
  <node id="30334" label="WP_057576508_1" cy:nodeId="2015">
    <graphics x="2037.68505859375" z="0.0" y="505.2156982421875"/>
  </node>
  <node id="30333" label="WP_107442966_2" cy:nodeId="2016">
    <graphics x="1981.09716796875" z="0.0" y="412.9781188964844"/>
  </node>
  <node id="30332" label="WP_107442966_1" cy:nodeId="2017">
    <graphics x="2130.6708984375" z="0.0" y="446.718994140625"/>
  </node>
  <node id="30331" label="WP_089596247_2" cy:nodeId="2018">
    <graphics x="2309.26318359375" z="0.0" y="420.1316833496094"/>
  </node>
  <node id="30330" label="WP_091325076_1" cy:nodeId="2019">
    <graphics x="2409.4033203125" z="0.0" y="337.1882019042969"/>
  </node>
  <node id="30329" label="WP_128397239_3" cy:nodeId="2020">
    <graphics x="2397.64111328125" z="0.0" y="315.9015808105469"/>
  </node>
  <node id="30328" label="WP_091470208_2" cy:nodeId="2021">
    <graphics x="2424.66650390625" z="0.0" y="322.9180603027344"/>
  </node>
  <node id="30327" label="WP_043470682_1" cy:nodeId="2022">
    <graphics x="2273.822021484375" z="0.0" y="400.4214172363281"/>
  </node>
  <node id="30326" label="WP_031216848_1" cy:nodeId="2023">
    <graphics x="2401.5556640625" z="0.0" y="428.98687744140625"/>
  </node>
  <node id="30325" label="WP_062071474_2" cy:nodeId="2024">
    <graphics x="2333.124755859375" z="0.0" y="317.14935302734375"/>
  </node>
  <node id="30324" label="AOY69839_2" cy:nodeId="2025">
    <graphics x="2410.90087890625" z="0.0" y="278.3041687011719"/>
  </node>
  <node id="30323" label="WP_031216848_2" cy:nodeId="2026">
    <graphics x="2292.240234375" z="0.0" y="277.8968200683594"/>
  </node>
  <node id="30322" label="WP_091325076_2" cy:nodeId="2027">
    <graphics x="2285.251953125" z="0.0" y="411.30352783203125"/>
  </node>
  <node id="30321" label="WP_062097999_2" cy:nodeId="2028">
    <graphics x="2361.35546875" z="0.0" y="335.83160400390625"/>
  </node>
  <node id="30320" label="SCZ59071_1" cy:nodeId="2029">
    <graphics x="2331.478271484375" z="0.0" y="383.1178894042969"/>
  </node>
  <node id="30319" label="SCZ59071_2" cy:nodeId="2030">
    <graphics x="2281.552001953125" z="0.0" y="316.41949462890625"/>
  </node>
  <node id="30318" label="WP_105691909_1" cy:nodeId="2031">
    <graphics x="2366.697998046875" z="0.0" y="374.2265625"/>
  </node>
  <node id="30317" label="WP_097165202_4" cy:nodeId="2032">
    <graphics x="2378.416259765625" z="0.0" y="183.10427856445312"/>
  </node>
  <node id="30316" label="AFR30485_3" cy:nodeId="2033">
    <graphics x="2440.262451171875" z="0.0" y="358.511962890625"/>
  </node>
  <node id="30315" label="WP_026542026_2" cy:nodeId="2034">
    <graphics x="2347.371826171875" z="0.0" y="411.5181579589844"/>
  </node>
  <node id="30314" label="WP_105691909_3" cy:nodeId="2035">
    <graphics x="2388.782470703125" z="0.0" y="436.851318359375"/>
  </node>
  <node id="30313" label="WP_062071474_1" cy:nodeId="2036">
    <graphics x="2391.22216796875" z="0.0" y="283.5606689453125"/>
  </node>
  <node id="30312" label="SCZ59071_3" cy:nodeId="2037">
    <graphics x="2248.85693359375" z="0.0" y="389.9073181152344"/>
  </node>
  <node id="30311" label="WP_127571148_4" cy:nodeId="2038">
    <graphics x="1919.2413330078125" z="0.0" y="309.0205078125"/>
  </node>
  <node id="30310" label="WP_031012255_2" cy:nodeId="2039">
    <graphics x="2084.344482421875" z="0.0" y="232.45693969726562"/>
  </node>
  <node id="30309" label="WP_104263679_4" cy:nodeId="2040">
    <graphics x="2348.417724609375" z="0.0" y="146.5513916015625"/>
  </node>
  <node id="30308" label="WP_055478352_3" cy:nodeId="2041">
    <graphics x="2122.969970703125" z="0.0" y="258.1212463378906"/>
  </node>
  <node id="30307" label="WP_061783869_2" cy:nodeId="2042">
    <graphics x="2115.080322265625" z="0.0" y="377.3731689453125"/>
  </node>
  <node id="30306" label="WP_061783869_5" cy:nodeId="2043">
    <graphics x="1984.930419921875" z="0.0" y="248.05755615234375"/>
  </node>
  <node id="30305" label="WP_107442966_3" cy:nodeId="2044">
    <graphics x="2026.4317626953125" z="0.0" y="325.9800720214844"/>
  </node>
  <node id="30304" label="WP_076825825_4" cy:nodeId="2045">
    <graphics x="2166.775390625" z="0.0" y="271.9188232421875"/>
  </node>
  <node id="30303" label="WP_057576508_2" cy:nodeId="2046">
    <graphics x="2090.987548828125" z="0.0" y="409.87884521484375"/>
  </node>
  <node id="30302" label="WP_094737915_3" cy:nodeId="2047">
    <graphics x="1958.512939453125" z="0.0" y="467.9353332519531"/>
  </node>
  <node id="30301" label="WP_062097999_3" cy:nodeId="2048">
    <graphics x="2382.205078125" z="0.0" y="265.7643127441406"/>
  </node>
  <node id="30300" label="AOY69839_1" cy:nodeId="2049">
    <graphics x="2243.927734375" z="0.0" y="343.1917724609375"/>
  </node>
  <node id="30299" label="WP_026542026_3" cy:nodeId="2050">
    <graphics x="2357.18017578125" z="0.0" y="366.13824462890625"/>
  </node>
  <node id="30298" label="AFR30485_1" cy:nodeId="2051">
    <graphics x="2280.971435546875" z="0.0" y="365.33843994140625"/>
  </node>
  <node id="30297" label="WP_076045700_2" cy:nodeId="2052">
    <graphics x="2148.46435546875" z="0.0" y="423.6632385253906"/>
  </node>
  <node id="30296" label="WP_031012255_3" cy:nodeId="2053">
    <graphics x="2079.038330078125" z="0.0" y="368.3182067871094"/>
  </node>
  <node id="30295" label="WP_060180042_3" cy:nodeId="2054">
    <graphics x="2036.85791015625" z="0.0" y="295.6180725097656"/>
  </node>
  <node id="30294" label="WP_116246380_2" cy:nodeId="2055">
    <graphics x="2041.799560546875" z="0.0" y="453.1390380859375"/>
  </node>
  <node id="30293" label="WP_061783869_6" cy:nodeId="2056">
    <graphics x="2061.6015625" z="0.0" y="371.8370361328125"/>
  </node>
  <node id="30292" label="WP_055478352_2" cy:nodeId="2057">
    <graphics x="2173.09521484375" z="0.0" y="385.047119140625"/>
  </node>
  <node id="30291" label="WP_107442966_4" cy:nodeId="2058">
    <graphics x="1998.6575927734375" z="0.0" y="352.33929443359375"/>
  </node>
  <node id="30290" label="SCD31130_2" cy:nodeId="2059">
    <graphics x="2136.1943359375" z="0.0" y="311.64593505859375"/>
  </node>
  <node id="30289" label="WP_078909294_6" cy:nodeId="2060">
    <graphics x="1976.283447265625" z="0.0" y="346.7044982910156"/>
  </node>
  <node id="30288" label="WP_055478352_1" cy:nodeId="2061">
    <graphics x="2152.710205078125" z="0.0" y="309.539794921875"/>
  </node>
  <node id="30287" label="WP_087133921_1" cy:nodeId="2062">
    <graphics x="2003.049560546875" z="0.0" y="374.85235595703125"/>
  </node>
  <node id="30286" label="WP_089596247_1" cy:nodeId="2063">
    <graphics x="2414.9765625" z="0.0" y="410.0291748046875"/>
  </node>
  <node id="30285" label="WP_024818115_1" cy:nodeId="2064">
    <graphics x="2329.1953125" z="0.0" y="335.4366455078125"/>
  </node>
  <node id="30284" label="WP_031216848_3" cy:nodeId="2065">
    <graphics x="2462.730712890625" z="0.0" y="300.56103515625"/>
  </node>
  <node id="30283" label="WP_128397239_2" cy:nodeId="2066">
    <graphics x="2289.5205078125" z="0.0" y="282.7375793457031"/>
  </node>
  <node id="30282" label="AOY69839_3" cy:nodeId="2067">
    <graphics x="2469.3701171875" z="0.0" y="390.0666198730469"/>
  </node>
  <node id="30281" label="WP_133928419_1" cy:nodeId="2068">
    <graphics x="2089.09912109375" z="0.0" y="321.32904052734375"/>
  </node>
  <node id="30280" label="WP_078909294_4" cy:nodeId="2069">
    <graphics x="2004.6962890625" z="0.0" y="407.89483642578125"/>
  </node>
  <node id="30279" label="WP_093544729_2" cy:nodeId="2070">
    <graphics x="2022.92578125" z="0.0" y="329.020263671875"/>
  </node>
  <node id="30278" label="WP_060180042_1" cy:nodeId="2071">
    <graphics x="2096.9833984375" z="0.0" y="297.2693786621094"/>
  </node>
  <node id="30277" label="WP_131746916_1" cy:nodeId="2072">
    <graphics x="2168.640869140625" z="0.0" y="207.96414184570312"/>
  </node>
  <node id="30276" label="WP_031072263_5" cy:nodeId="2073">
    <graphics x="2020.1446533203125" z="0.0" y="249.61013793945312"/>
  </node>
  <node id="30275" label="WP_104263679_6" cy:nodeId="2074">
    <graphics x="2320.58642578125" z="0.0" y="280.42010498046875"/>
  </node>
  <node id="30274" label="WP_024818115_3" cy:nodeId="2075">
    <graphics x="2267.74853515625" z="0.0" y="275.1471252441406"/>
  </node>
  <node id="30273" label="WP_100045344_2" cy:nodeId="2076">
    <graphics x="2041.547119140625" z="0.0" y="471.24609375"/>
  </node>
  <node id="30272" label="WP_073943269_1" cy:nodeId="2077">
    <graphics x="2131.055908203125" z="0.0" y="394.77130126953125"/>
  </node>
  <node id="30271" label="WP_018500447_1" cy:nodeId="2078">
    <graphics x="2206.711181640625" z="0.0" y="380.55657958984375"/>
  </node>
  <node id="30270" label="WP_121405200_2" cy:nodeId="2079">
    <graphics x="2030.06591796875" z="0.0" y="360.28399658203125"/>
  </node>
  <node id="30269" label="WP_057576508_5" cy:nodeId="2080">
    <graphics x="2047.24609375" z="0.0" y="432.8662109375"/>
  </node>
  <node id="30268" label="WP_133928419_2" cy:nodeId="2081">
    <graphics x="2051.931884765625" z="0.0" y="481.28131103515625"/>
  </node>
  <node id="30267" label="WP_073943269_3" cy:nodeId="2082">
    <graphics x="2075.560302734375" z="0.0" y="313.9319763183594"/>
  </node>
  <node id="30266" label="WP_100045344_1" cy:nodeId="2083">
    <graphics x="2055.35595703125" z="0.0" y="315.71185302734375"/>
  </node>
  <node id="30265" label="WP_018500447_2" cy:nodeId="2084">
    <graphics x="2090.364013671875" z="0.0" y="285.9249572753906"/>
  </node>
  <node id="30264" label="WP_028265499_4" cy:nodeId="2085">
    <graphics x="2380.212646484375" z="0.0" y="392.7456359863281"/>
  </node>
  <node id="30263" label="WP_076825825_5" cy:nodeId="2086">
    <graphics x="2240.95703125" z="0.0" y="310.0115966796875"/>
  </node>
  <node id="30262" label="WP_052038751_2" cy:nodeId="2087">
    <graphics x="2188.222900390625" z="0.0" y="341.9902648925781"/>
  </node>
  <node id="30261" label="WP_057576508_6" cy:nodeId="2088">
    <graphics x="2105.43017578125" z="0.0" y="313.9942626953125"/>
  </node>
  <node id="30260" label="WP_128397239_1" cy:nodeId="2089">
    <graphics x="2318.7890625" z="0.0" y="293.54998779296875"/>
  </node>
  <node id="30259" label="WP_062097999_1" cy:nodeId="2090">
    <graphics x="2310.2490234375" z="0.0" y="406.709228515625"/>
  </node>
  <node id="30258" label="WP_129283158_2" cy:nodeId="2091">
    <graphics x="2318.38916015625" z="0.0" y="241.9410400390625"/>
  </node>
  <node id="30257" label="WP_052038751_1" cy:nodeId="2092">
    <graphics x="2218.3818359375" z="0.0" y="227.0670166015625"/>
  </node>
  <node id="30256" label="WP_007034522_1" cy:nodeId="2093">
    <graphics x="1004.709228515625" z="0.0" y="940.341064453125"/>
  </node>
  <node id="30255" label="WP_051471145_2" cy:nodeId="2094">
    <graphics x="1204.5985107421875" z="0.0" y="794.54931640625"/>
  </node>
  <node id="30254" label="WP_125229237_2" cy:nodeId="2095">
    <graphics x="1403.1134033203125" z="0.0" y="930.4581298828125"/>
  </node>
  <node id="30253" label="WP_104276858_2" cy:nodeId="2096">
    <graphics x="1224.5570068359375" z="0.0" y="856.6201171875"/>
  </node>
  <node id="30252" label="WP_079037558_4" cy:nodeId="2097">
    <graphics x="1259.3062744140625" z="0.0" y="867.7957763671875"/>
  </node>
  <node id="30251" label="WP_089510240_2" cy:nodeId="2098">
    <graphics x="1176.890380859375" z="0.0" y="27.2222900390625"/>
  </node>
  <node id="30250" label="WP_122977382_2" cy:nodeId="2099">
    <graphics x="1328.7789306640625" z="0.0" y="955.9930419921875"/>
  </node>
  <node id="30249" label="WP_007034516_5" cy:nodeId="2100">
    <graphics x="1110.60498046875" z="0.0" y="863.52978515625"/>
  </node>
  <node id="30248" label="WP_007034516_2" cy:nodeId="2101">
    <graphics x="960.1778564453125" z="0.0" y="801.909423828125"/>
  </node>
  <node id="30247" label="WP_083715654_3" cy:nodeId="2102">
    <graphics x="974.4107666015625" z="0.0" y="829.0795288085938"/>
  </node>
  <node id="30246" label="WP_055480275_3" cy:nodeId="2103">
    <graphics x="1149.0748291015625" z="0.0" y="918.8961181640625"/>
  </node>
  <node id="30245" label="WP_007034516_1" cy:nodeId="2104">
    <graphics x="1022.095703125" z="0.0" y="905.3922119140625"/>
  </node>
  <node id="30244" label="WP_043489503_1" cy:nodeId="2105">
    <graphics x="1063.8448486328125" z="0.0" y="93.15838623046875"/>
  </node>
  <node id="30243" label="WP_007034522_3" cy:nodeId="2106">
    <graphics x="720.734130859375" z="0.0" y="908.1865234375"/>
  </node>
  <node id="30242" label="WP_019617890_3" cy:nodeId="2107">
    <graphics x="1099.77490234375" z="0.0" y="623.8262939453125"/>
  </node>
  <node id="30241" label="WP_027734146_9002" cy:nodeId="2108">
    <graphics x="1348.2799072265625" z="0.0" y="719.6919555664062"/>
  </node>
  <node id="30240" label="WP_103517254_3" cy:nodeId="2109">
    <graphics x="1147.8975830078125" z="0.0" y="617.8742065429688"/>
  </node>
  <node id="30239" label="WP_055480275_2" cy:nodeId="2110">
    <graphics x="1307.0548095703125" z="0.0" y="1016.865234375"/>
  </node>
  <node id="30238" label="WP_052311581_2" cy:nodeId="2111">
    <graphics x="1249.59326171875" z="0.0" y="1103.2347412109375"/>
  </node>
  <node id="30237" label="WP_051471145_1" cy:nodeId="2112">
    <graphics x="1158.7952880859375" z="0.0" y="762.9805297851562"/>
  </node>
  <node id="30236" label="KUJ49673_4" cy:nodeId="2113">
    <graphics x="1392.37060546875" z="0.0" y="546.6888427734375"/>
  </node>
  <node id="30235" label="WP_055480275_1" cy:nodeId="2114">
    <graphics x="1677.555419921875" z="0.0" y="498.06884765625"/>
  </node>
  <node id="30234" label="WP_051325718_3" cy:nodeId="2115">
    <graphics x="992.8889770507812" z="0.0" y="713.4697265625"/>
  </node>
  <node id="30233" label="WP_046777828_5" cy:nodeId="2116">
    <graphics x="1207.517333984375" z="0.0" y="829.5909423828125"/>
  </node>
  <node id="30232" label="ONF71727_3" cy:nodeId="2117">
    <graphics x="985.5045166015625" z="0.0" y="862.4129638671875"/>
  </node>
  <node id="30231" label="WP_007034522_5" cy:nodeId="2118">
    <graphics x="995.6090087890625" z="0.0" y="763.74560546875"/>
  </node>
  <node id="30230" label="WP_053587900_3" cy:nodeId="2119">
    <graphics x="1165.3968505859375" z="0.0" y="648.6688842773438"/>
  </node>
  <node id="30229" label="OFL66352_1" cy:nodeId="2120">
    <graphics x="1382.4947509765625" z="0.0" y="651.08349609375"/>
  </node>
  <node id="30228" label="WP_114021280_3" cy:nodeId="2121">
    <graphics x="1253.9622802734375" z="0.0" y="605.6132202148438"/>
  </node>
  <node id="30227" label="WP_039637774_2" cy:nodeId="2122">
    <graphics x="1206.2637939453125" z="0.0" y="646.2274780273438"/>
  </node>
  <node id="30226" label="WP_027734146_9006" cy:nodeId="2123">
    <graphics x="1165.5665283203125" z="0.0" y="841.6321411132812"/>
  </node>
  <node id="30225" label="WP_076252265_1" cy:nodeId="2124">
    <graphics x="1162.404052734375" z="0.0" y="554.79833984375"/>
  </node>
  <node id="30224" label="WP_009405321_3" cy:nodeId="2125">
    <graphics x="1134.353759765625" z="0.0" y="630.8053588867188"/>
  </node>
  <node id="30223" label="WP_126414579_3" cy:nodeId="2126">
    <graphics x="1042.82177734375" z="0.0" y="571.7009887695312"/>
  </node>
  <node id="30222" label="WP_075412233_3" cy:nodeId="2127">
    <graphics x="1069.0338134765625" z="0.0" y="578.8102416992188"/>
  </node>
  <node id="30221" label="WP_075405296_3" cy:nodeId="2128">
    <graphics x="1074.67333984375" z="0.0" y="642.2867431640625"/>
  </node>
  <node id="30220" label="WP_026426216_3" cy:nodeId="2129">
    <graphics x="1036.3369140625" z="0.0" y="593.1324462890625"/>
  </node>
  <node id="30219" label="WP_017177815_3" cy:nodeId="2130">
    <graphics x="1183.0166015625" z="0.0" y="497.40814208984375"/>
  </node>
  <node id="30218" label="WP_017177897_3" cy:nodeId="2131">
    <graphics x="1042.7916259765625" z="0.0" y="707.3009033203125"/>
  </node>
  <node id="30217" label="WP_070696063_3" cy:nodeId="2132">
    <graphics x="1174.3697509765625" z="0.0" y="503.71673583984375"/>
  </node>
  <node id="30216" label="WP_056678071_5" cy:nodeId="2133">
    <graphics x="1206.304931640625" z="0.0" y="570.365478515625"/>
  </node>
  <node id="30215" label="WP_042733817_1" cy:nodeId="2134">
    <graphics x="1393.8048095703125" z="0.0" y="851.930908203125"/>
  </node>
  <node id="30214" label="WP_055699111_1" cy:nodeId="2135">
    <graphics x="1110.178955078125" z="0.0" y="711.6026611328125"/>
  </node>
  <node id="30213" label="WP_079171959_5" cy:nodeId="2136">
    <graphics x="1277.10107421875" z="0.0" y="619.735595703125"/>
  </node>
  <node id="30212" label="WP_125229237_1" cy:nodeId="2137">
    <graphics x="1333.29443359375" z="0.0" y="574.8619384765625"/>
  </node>
  <node id="30211" label="WP_081707409_3" cy:nodeId="2138">
    <graphics x="1453.396240234375" z="0.0" y="367.21795654296875"/>
  </node>
  <node id="30210" label="ONF71727_4" cy:nodeId="2139">
    <graphics x="792.8665771484375" z="0.0" y="1052.8455810546875"/>
  </node>
  <node id="30209" label="WP_083715654_4" cy:nodeId="2140">
    <graphics x="724.7125244140625" z="0.0" y="969.3701171875"/>
  </node>
  <node id="30208" label="ADI05355_1" cy:nodeId="2141">
    <graphics x="1056.1102294921875" z="0.0" y="30.0870361328125"/>
  </node>
  <node id="30207" label="WP_030288747_2" cy:nodeId="2142">
    <graphics x="1154.194580078125" z="0.0" y="752.9295043945312"/>
  </node>
  <node id="30206" label="WP_114018158_2" cy:nodeId="2143">
    <graphics x="1166.3779296875" z="0.0" y="584.1434936523438"/>
  </node>
  <node id="30205" label="WP_030257607_4" cy:nodeId="2144">
    <graphics x="1290.786865234375" z="0.0" y="686.4700927734375"/>
  </node>
  <node id="30204" label="WP_055699111_5" cy:nodeId="2145">
    <graphics x="1183.3707275390625" z="0.0" y="795.9227905273438"/>
  </node>
  <node id="30203" label="CUM40551_3" cy:nodeId="2146">
    <graphics x="1163.18798828125" z="0.0" y="724.2913818359375"/>
  </node>
  <node id="30202" label="WP_051471145_3" cy:nodeId="2147">
    <graphics x="1149.436279296875" z="0.0" y="816.1451416015625"/>
  </node>
  <node id="30201" label="WP_104276858_3" cy:nodeId="2148">
    <graphics x="1310.7984619140625" z="0.0" y="630.6010131835938"/>
  </node>
  <node id="30200" label="WP_042733817_3" cy:nodeId="2149">
    <graphics x="1310.473388671875" z="0.0" y="450.461669921875"/>
  </node>
  <node id="30199" label="WP_030257607_2" cy:nodeId="2150">
    <graphics x="1158.6280517578125" z="0.0" y="554.0711059570312"/>
  </node>
  <node id="30198" label="WP_083715654_2" cy:nodeId="2151">
    <graphics x="863.160400390625" z="0.0" y="804.5654296875"/>
  </node>
  <node id="30197" label="WP_072028150_1" cy:nodeId="2152">
    <graphics x="853.391845703125" z="0.0" y="849.3776245117188"/>
  </node>
  <node id="30196" label="WP_007034522_2" cy:nodeId="2153">
    <graphics x="956.6458129882812" z="0.0" y="851.3839111328125"/>
  </node>
  <node id="30195" label="ONF71727_2" cy:nodeId="2154">
    <graphics x="826.20947265625" z="0.0" y="888.34912109375"/>
  </node>
  <node id="30194" label="WP_114018158_4" cy:nodeId="2155">
    <graphics x="1291.0875244140625" z="0.0" y="816.7293090820312"/>
  </node>
  <node id="30193" label="OEV01037_2" cy:nodeId="2156">
    <graphics x="1275.420166015625" z="0.0" y="935.863525390625"/>
  </node>
  <node id="30192" label="WP_073452776_3" cy:nodeId="2157">
    <graphics x="1078.103515625" z="0.0" y="564.9035034179688"/>
  </node>
  <node id="30191" label="WP_075417427_3" cy:nodeId="2158">
    <graphics x="1132.868896484375" z="0.0" y="647.4602661132812"/>
  </node>
  <node id="30190" label="WP_083304061_3" cy:nodeId="2159">
    <graphics x="1453.1812744140625" z="0.0" y="698.0269775390625"/>
  </node>
  <node id="30189" label="WP_083318853_1" cy:nodeId="2160">
    <graphics x="1367.4197998046875" z="0.0" y="684.921630859375"/>
  </node>
  <node id="30188" label="WP_083318853_3" cy:nodeId="2161">
    <graphics x="1475.2186279296875" z="0.0" y="652.6589965820312"/>
  </node>
  <node id="30187" label="WP_046777828_3" cy:nodeId="2162">
    <graphics x="1305.11669921875" z="0.0" y="780.9927368164062"/>
  </node>
  <node id="30186" label="OFL66352_3" cy:nodeId="2163">
    <graphics x="1451.882080078125" z="0.0" y="607.75537109375"/>
  </node>
  <node id="30185" label="WP_053690379_1" cy:nodeId="2164">
    <graphics x="1352.5341796875" z="0.0" y="761.4008178710938"/>
  </node>
  <node id="30184" label="WP_083304061_1" cy:nodeId="2165">
    <graphics x="1396.9730224609375" z="0.0" y="763.91650390625"/>
  </node>
  <node id="30183" label="WP_093640559_5" cy:nodeId="2166">
    <graphics x="1096.948486328125" z="0.0" y="666.69677734375"/>
  </node>
  <node id="30182" label="WP_027760735_2" cy:nodeId="2167">
    <graphics x="1296.048095703125" z="0.0" y="882.782470703125"/>
  </node>
  <node id="30181" label="WP_136217272_2" cy:nodeId="2168">
    <graphics x="1352.3311767578125" z="0.0" y="750.598388671875"/>
  </node>
  <node id="30180" label="WP_093614914_1" cy:nodeId="2169">
    <graphics x="1269.349609375" z="0.0" y="1014.50244140625"/>
  </node>
  <node id="30179" label="WP_089295762_2" cy:nodeId="2170">
    <graphics x="1312.8218994140625" z="0.0" y="1055.4281005859375"/>
  </node>
  <node id="30178" label="AEV84085_2" cy:nodeId="2171">
    <graphics x="1362.2041015625" z="0.0" y="1152.993408203125"/>
  </node>
  <node id="30177" label="WP_076971825_1" cy:nodeId="2172">
    <graphics x="1118.49365234375" z="0.0" y="0.0"/>
  </node>
  <node id="30176" label="WP_040887728_1" cy:nodeId="2173">
    <graphics x="1196.3302001953125" z="0.0" y="91.11190795898438"/>
  </node>
  <node id="30175" label="EMF02011_1" cy:nodeId="2174">
    <graphics x="1132.563720703125" z="0.0" y="95.505615234375"/>
  </node>
  <node id="30174" label="KUJ49673_7" cy:nodeId="2175">
    <graphics x="1059.8087158203125" z="0.0" y="799.6142578125"/>
  </node>
  <node id="30173" label="WP_086575168_1" cy:nodeId="2176">
    <graphics x="1096.735595703125" z="0.0" y="1016.4139404296875"/>
  </node>
  <node id="30172" label="WP_113979657_3" cy:nodeId="2177">
    <graphics x="949.6716918945312" z="0.0" y="1114.932373046875"/>
  </node>
  <node id="30171" label="WP_111166051_6" cy:nodeId="2178">
    <graphics x="1056.2276611328125" z="0.0" y="965.483642578125"/>
  </node>
  <node id="30170" label="WP_053690379_3" cy:nodeId="2179">
    <graphics x="1316.9576416015625" z="0.0" y="784.56396484375"/>
  </node>
  <node id="30169" label="WP_104276858_4" cy:nodeId="2180">
    <graphics x="1229.67529296875" z="0.0" y="703.7979125976562"/>
  </node>
  <node id="30168" label="WP_019617890_4" cy:nodeId="2181">
    <graphics x="1383.2259521484375" z="0.0" y="719.65966796875"/>
  </node>
  <node id="30167" label="WP_027734146_9005" cy:nodeId="2182">
    <graphics x="1273.72607421875" z="0.0" y="801.7548217773438"/>
  </node>
  <node id="30166" label="WP_007269626_3" cy:nodeId="2183">
    <graphics x="1251.7952880859375" z="0.0" y="814.0771484375"/>
  </node>
  <node id="30165" label="WP_039637774_1" cy:nodeId="2184">
    <graphics x="1080.5869140625" z="0.0" y="839.614013671875"/>
  </node>
  <node id="30164" label="WP_124933089_3" cy:nodeId="2185">
    <graphics x="1074.7763671875" z="0.0" y="692.61279296875"/>
  </node>
  <node id="30163" label="WP_043563867_2" cy:nodeId="2186">
    <graphics x="1139.248046875" z="0.0" y="525.0841674804688"/>
  </node>
  <node id="30162" label="WP_034253534_3" cy:nodeId="2187">
    <graphics x="1083.939697265625" z="0.0" y="559.0064086914062"/>
  </node>
  <node id="30161" label="WP_046777828_4" cy:nodeId="2188">
    <graphics x="1204.0443115234375" z="0.0" y="783.6414794921875"/>
  </node>
  <node id="30160" label="WP_053690379_2" cy:nodeId="2189">
    <graphics x="1242.9248046875" z="0.0" y="738.34033203125"/>
  </node>
  <node id="30159" label="WP_136217272_1" cy:nodeId="2190">
    <graphics x="1239.0704345703125" z="0.0" y="756.8366088867188"/>
  </node>
  <node id="30158" label="WP_018090000_1" cy:nodeId="2191">
    <graphics x="1101.9091796875" z="0.0" y="208.56350708007812"/>
  </node>
  <node id="30157" label="WP_070696063_5" cy:nodeId="2192">
    <graphics x="1135.2021484375" z="0.0" y="660.5953979492188"/>
  </node>
  <node id="30156" label="WP_007034516_3" cy:nodeId="2193">
    <graphics x="742.119140625" z="0.0" y="1016.499755859375"/>
  </node>
  <node id="30155" label="WP_017177897_2" cy:nodeId="2194">
    <graphics x="1231.2486572265625" z="0.0" y="645.7979736328125"/>
  </node>
  <node id="30154" label="WP_053587900_5" cy:nodeId="2195">
    <graphics x="1222.1854248046875" z="0.0" y="771.0224609375"/>
  </node>
  <node id="30153" label="WP_099881056_4" cy:nodeId="2196">
    <graphics x="1243.614013671875" z="0.0" y="692.4915161132812"/>
  </node>
  <node id="30152" label="OJH69022_4" cy:nodeId="2197">
    <graphics x="1128.5360107421875" z="0.0" y="642.3318481445312"/>
  </node>
  <node id="30151" label="WP_030288747_4" cy:nodeId="2198">
    <graphics x="1131.69775390625" z="0.0" y="679.8836669921875"/>
  </node>
  <node id="30150" label="OJH69022_2" cy:nodeId="2199">
    <graphics x="1236.903564453125" z="0.0" y="692.286865234375"/>
  </node>
  <node id="30149" label="WP_114029352_5" cy:nodeId="2200">
    <graphics x="1275.10107421875" z="0.0" y="611.97509765625"/>
  </node>
  <node id="30148" label="WP_027760735_4" cy:nodeId="2201">
    <graphics x="1203.144287109375" z="0.0" y="609.4446411132812"/>
  </node>
  <node id="30147" label="WP_079135024_3" cy:nodeId="2202">
    <graphics x="1237.339111328125" z="0.0" y="740.0137939453125"/>
  </node>
  <node id="30146" label="WP_114029352_3" cy:nodeId="2203">
    <graphics x="1157.8489990234375" z="0.0" y="594.7739868164062"/>
  </node>
  <node id="30145" label="WP_007451546_2" cy:nodeId="2204">
    <graphics x="1112.8048095703125" z="0.0" y="581.6477661132812"/>
  </node>
  <node id="30144" label="WP_103517254_2" cy:nodeId="2205">
    <graphics x="1156.105224609375" z="0.0" y="571.1887817382812"/>
  </node>
  <node id="30143" label="WP_007269626_2" cy:nodeId="2206">
    <graphics x="1239.24267578125" z="0.0" y="675.1821899414062"/>
  </node>
  <node id="30142" label="WP_079037558_2" cy:nodeId="2207">
    <graphics x="1147.3221435546875" z="0.0" y="764.3781127929688"/>
  </node>
  <node id="30141" label="WP_114029352_6" cy:nodeId="2208">
    <graphics x="1296.131591796875" z="0.0" y="639.0816650390625"/>
  </node>
  <node id="30140" label="WP_114029352_4" cy:nodeId="2209">
    <graphics x="1266.7406005859375" z="0.0" y="641.868408203125"/>
  </node>
  <node id="30139" label="WP_126890470_3" cy:nodeId="2210">
    <graphics x="1296.936767578125" z="0.0" y="749.24853515625"/>
  </node>
  <node id="30138" label="WP_030257607_1" cy:nodeId="2211">
    <graphics x="1123.491455078125" z="0.0" y="741.8697509765625"/>
  </node>
  <node id="30137" label="WP_114021280_2" cy:nodeId="2212">
    <graphics x="1154.33154296875" z="0.0" y="674.4287109375"/>
  </node>
  <node id="30136" label="WP_053587900_7" cy:nodeId="2213">
    <graphics x="1110.911376953125" z="0.0" y="561.50830078125"/>
  </node>
  <node id="30135" label="CUM40551_2" cy:nodeId="2214">
    <graphics x="1246.90185546875" z="0.0" y="767.5447998046875"/>
  </node>
  <node id="30134" label="WP_104349763_2" cy:nodeId="2215">
    <graphics x="1276.6424560546875" z="0.0" y="612.8392944335938"/>
  </node>
  <node id="30133" label="WP_103062468_1" cy:nodeId="2216">
    <graphics x="1182.3096923828125" z="0.0" y="748.5462646484375"/>
  </node>
  <node id="30132" label="WP_053587900_6" cy:nodeId="2217">
    <graphics x="1248.28125" z="0.0" y="720.8587036132812"/>
  </node>
  <node id="30131" label="WP_084416050_2" cy:nodeId="2218">
    <graphics x="1333.0938720703125" z="0.0" y="670.781982421875"/>
  </node>
  <node id="30130" label="WP_093640559_2" cy:nodeId="2219">
    <graphics x="1216.4185791015625" z="0.0" y="747.6001586914062"/>
  </node>
  <node id="30129" label="WP_093640559_1" cy:nodeId="2220">
    <graphics x="1289.568115234375" z="0.0" y="704.626708984375"/>
  </node>
  <node id="30128" label="WP_111035529_2" cy:nodeId="2221">
    <graphics x="1307.639892578125" z="0.0" y="693.566162109375"/>
  </node>
  <node id="30127" label="WP_056678071_2" cy:nodeId="2222">
    <graphics x="1160.587158203125" z="0.0" y="587.8994750976562"/>
  </node>
  <node id="30126" label="WP_017177897_1" cy:nodeId="2223">
    <graphics x="1178.281982421875" z="0.0" y="696.2122802734375"/>
  </node>
  <node id="30125" label="WP_055699111_2" cy:nodeId="2224">
    <graphics x="1155.38037109375" z="0.0" y="616.2284545898438"/>
  </node>
  <node id="30124" label="WP_039637774_3" cy:nodeId="2225">
    <graphics x="1336.9422607421875" z="0.0" y="627.29638671875"/>
  </node>
  <node id="30123" label="WP_056678071_3" cy:nodeId="2226">
    <graphics x="1152.6297607421875" z="0.0" y="693.9683227539062"/>
  </node>
  <node id="30122" label="WP_114018158_3" cy:nodeId="2227">
    <graphics x="1257.3389892578125" z="0.0" y="616.158203125"/>
  </node>
  <node id="30121" label="WP_055699111_4" cy:nodeId="2228">
    <graphics x="1150.29248046875" z="0.0" y="637.3272705078125"/>
  </node>
  <node id="30120" label="WP_017177897_4" cy:nodeId="2229">
    <graphics x="1229.0245361328125" z="0.0" y="654.1466674804688"/>
  </node>
  <node id="30119" label="CUM40551_1" cy:nodeId="2230">
    <graphics x="1254.395751953125" z="0.0" y="750.5006103515625"/>
  </node>
  <node id="30118" label="WP_030257607_3" cy:nodeId="2231">
    <graphics x="1258.05810546875" z="0.0" y="662.6531982421875"/>
  </node>
  <node id="30117" label="WP_093640559_3" cy:nodeId="2232">
    <graphics x="1231.794921875" z="0.0" y="717.4019775390625"/>
  </node>
  <node id="30116" label="WP_007451546_4" cy:nodeId="2233">
    <graphics x="1200.96826171875" z="0.0" y="616.9082641601562"/>
  </node>
  <node id="30115" label="OEV01037_4" cy:nodeId="2234">
    <graphics x="1235.884521484375" z="0.0" y="615.997802734375"/>
  </node>
  <node id="30114" label="WP_019617890_2" cy:nodeId="2235">
    <graphics x="1247.365234375" z="0.0" y="828.8319702148438"/>
  </node>
  <node id="30113" label="WP_136217272_3" cy:nodeId="2236">
    <graphics x="1163.8587646484375" z="0.0" y="770.5554809570312"/>
  </node>
  <node id="30112" label="WP_116427021_9005" cy:nodeId="2237">
    <graphics x="1236.6837158203125" z="0.0" y="703.4349975585938"/>
  </node>
  <node id="30111" label="WP_039637774_4" cy:nodeId="2238">
    <graphics x="1213.6663818359375" z="0.0" y="741.1986083984375"/>
  </node>
  <node id="30110" label="AJM78300_2" cy:nodeId="2239">
    <graphics x="1435.973388671875" z="0.0" y="787.3341064453125"/>
  </node>
  <node id="30109" label="OJH69022_3" cy:nodeId="2240">
    <graphics x="1257.999755859375" z="0.0" y="697.2459716796875"/>
  </node>
  <node id="30108" label="WP_079037558_3" cy:nodeId="2241">
    <graphics x="1209.979736328125" z="0.0" y="712.460693359375"/>
  </node>
  <node id="30107" label="WP_030288747_3" cy:nodeId="2242">
    <graphics x="1278.958984375" z="0.0" y="730.3027954101562"/>
  </node>
  <node id="30106" label="WP_103062468_2" cy:nodeId="2243">
    <graphics x="1117.84814453125" z="0.0" y="726.2213745117188"/>
  </node>
  <node id="30105" label="WP_026408316_3" cy:nodeId="2244">
    <graphics x="1076.2425537109375" z="0.0" y="605.7186889648438"/>
  </node>
  <node id="30104" label="WP_007451546_3" cy:nodeId="2245">
    <graphics x="1197.1065673828125" z="0.0" y="674.2916259765625"/>
  </node>
  <node id="30103" label="KUJ49673_2" cy:nodeId="2246">
    <graphics x="1109.1806640625" z="0.0" y="824.1339721679688"/>
  </node>
  <node id="30102" label="WP_116427021_9004" cy:nodeId="2247">
    <graphics x="1207.6021728515625" z="0.0" y="926.0885009765625"/>
  </node>
  <node id="30101" label="WP_116427021_9006" cy:nodeId="2248">
    <graphics x="1205.77490234375" z="0.0" y="805.799072265625"/>
  </node>
  <node id="30100" label="WP_103062468_4" cy:nodeId="2249">
    <graphics x="1111.502197265625" z="0.0" y="648.3656616210938"/>
  </node>
  <node id="30099" label="WP_103517254_4" cy:nodeId="2250">
    <graphics x="1266.84375" z="0.0" y="654.6222534179688"/>
  </node>
  <node id="30098" label="CUM40551_4" cy:nodeId="2251">
    <graphics x="1224.916015625" z="0.0" y="571.0330810546875"/>
  </node>
  <node id="30097" label="WP_070696063_4" cy:nodeId="2252">
    <graphics x="1170.056396484375" z="0.0" y="632.1408081054688"/>
  </node>
  <node id="30096" label="WP_103062468_5" cy:nodeId="2253">
    <graphics x="1268.4898681640625" z="0.0" y="616.1336059570312"/>
  </node>
  <node id="30095" label="WP_027760735_5" cy:nodeId="2254">
    <graphics x="1105.2203369140625" z="0.0" y="717.3186645507812"/>
  </node>
  <node id="30094" label="WP_075414364_3" cy:nodeId="2255">
    <graphics x="1242.9500732421875" z="0.0" y="600.6707153320312"/>
  </node>
  <node id="30093" label="WP_007451546_1" cy:nodeId="2256">
    <graphics x="1143.1981201171875" z="0.0" y="745.7740478515625"/>
  </node>
  <node id="30092" label="WP_007451546_5" cy:nodeId="2257">
    <graphics x="1171.6224365234375" z="0.0" y="660.9915771484375"/>
  </node>
  <node id="30091" label="EGQ75425_3" cy:nodeId="2258">
    <graphics x="1110.683349609375" z="0.0" y="618.2904052734375"/>
  </node>
  <node id="30090" label="WP_055699111_3" cy:nodeId="2259">
    <graphics x="1204.38916015625" z="0.0" y="665.1057739257812"/>
  </node>
  <node id="30089" label="WP_079135024_4" cy:nodeId="2260">
    <graphics x="1228.1341552734375" z="0.0" y="706.3394165039062"/>
  </node>
  <node id="30088" label="WP_075376581_3" cy:nodeId="2261">
    <graphics x="1115.9210205078125" z="0.0" y="524.4990234375"/>
  </node>
  <node id="30087" label="WP_103517254_5" cy:nodeId="2262">
    <graphics x="1183.427734375" z="0.0" y="622.262939453125"/>
  </node>
  <node id="30086" label="WP_103517254_7" cy:nodeId="2263">
    <graphics x="1117.7332763671875" z="0.0" y="603.0089111328125"/>
  </node>
  <node id="30085" label="WP_053587900_4" cy:nodeId="2264">
    <graphics x="1244.90478515625" z="0.0" y="792.9520263671875"/>
  </node>
  <node id="30084" label="OEV01037_5" cy:nodeId="2265">
    <graphics x="1163.8740234375" z="0.0" y="733.3305053710938"/>
  </node>
  <node id="30083" label="WP_126382680_4" cy:nodeId="2266">
    <graphics x="1063.9476318359375" z="0.0" y="695.2396240234375"/>
  </node>
  <node id="30082" label="WP_079037558_5" cy:nodeId="2267">
    <graphics x="1143.6458740234375" z="0.0" y="674.22509765625"/>
  </node>
  <node id="30081" label="WP_114029352_9" cy:nodeId="2268">
    <graphics x="1258.467529296875" z="0.0" y="562.2056884765625"/>
  </node>
  <node id="30080" label="WP_056678071_4" cy:nodeId="2269">
    <graphics x="1150.3797607421875" z="0.0" y="704.416748046875"/>
  </node>
  <node id="30079" label="WP_114029352_7" cy:nodeId="2270">
    <graphics x="1185.6351318359375" z="0.0" y="614.3449096679688"/>
  </node>
  <node id="30078" label="WP_099881056_5" cy:nodeId="2271">
    <graphics x="1186.8468017578125" z="0.0" y="700.2747192382812"/>
  </node>
  <node id="30077" label="VEG28624_4" cy:nodeId="2272">
    <graphics x="1223.4185791015625" z="0.0" y="531.005126953125"/>
  </node>
  <node id="30076" label="WP_114021280_4" cy:nodeId="2273">
    <graphics x="1233.29345703125" z="0.0" y="676.3431396484375"/>
  </node>
  <node id="30075" label="OEV01037_3" cy:nodeId="2274">
    <graphics x="1158.7174072265625" z="0.0" y="701.968994140625"/>
  </node>
  <node id="30074" label="WP_079135024_2" cy:nodeId="2275">
    <graphics x="1213.672607421875" z="0.0" y="603.6761474609375"/>
  </node>
  <node id="30073" label="WP_070696063_1" cy:nodeId="2276">
    <graphics x="1292.667236328125" z="0.0" y="619.4147338867188"/>
  </node>
  <node id="30072" label="WP_104349763_1" cy:nodeId="2277">
    <graphics x="1168.47509765625" z="0.0" y="741.1022338867188"/>
  </node>
  <node id="30071" label="WP_099881056_3" cy:nodeId="2278">
    <graphics x="1223.734619140625" z="0.0" y="733.6109008789062"/>
  </node>
  <node id="30070" label="WP_079171959_4" cy:nodeId="2279">
    <graphics x="1205.6195068359375" z="0.0" y="666.6432495117188"/>
  </node>
  <node id="30069" label="WP_027760735_3" cy:nodeId="2280">
    <graphics x="1163.9501953125" z="0.0" y="685.2392578125"/>
  </node>
  <node id="30068" label="WP_079171959_3" cy:nodeId="2281">
    <graphics x="1273.5806884765625" z="0.0" y="661.2151489257812"/>
  </node>
  <node id="30067" label="WP_114018158_5" cy:nodeId="2282">
    <graphics x="1132.8995361328125" z="0.0" y="710.2185668945312"/>
  </node>
  <node id="30066" label="WP_104349763_3" cy:nodeId="2283">
    <graphics x="1265.16259765625" z="0.0" y="657.0633544921875"/>
  </node>
  <node id="30065" label="ONF71727_6" cy:nodeId="2284">
    <graphics x="874.1324462890625" z="0.0" y="961.23046875"/>
  </node>
  <node id="30064" label="WP_007034516_4" cy:nodeId="2285">
    <graphics x="930.1406860351562" z="0.0" y="963.19384765625"/>
  </node>
  <node id="30063" label="WP_083715654_6" cy:nodeId="2286">
    <graphics x="855.367431640625" z="0.0" y="922.4852294921875"/>
  </node>
  <node id="30062" label="WP_007034522_4" cy:nodeId="2287">
    <graphics x="921.0263671875" z="0.0" y="907.6561279296875"/>
  </node>
  <node id="30061" label="WP_079171959_2" cy:nodeId="2288">
    <graphics x="1345.1337890625" z="0.0" y="802.08984375"/>
  </node>
  <node id="30060" label="WP_099881056_2" cy:nodeId="2289">
    <graphics x="1330.756103515625" z="0.0" y="846.60107421875"/>
  </node>
  <node id="30059" label="WP_114021280_5" cy:nodeId="2290">
    <graphics x="1178.5914306640625" z="0.0" y="849.8594360351562"/>
  </node>
  <node id="30058" label="WP_027734146_9001" cy:nodeId="2291">
    <graphics x="1197.027099609375" z="0.0" y="894.7243041992188"/>
  </node>
  <node id="30057" label="WP_116427021_9001" cy:nodeId="2292">
    <graphics x="1213.70654296875" z="0.0" y="805.2442016601562"/>
  </node>
  <node id="30056" label="WP_079135024_1" cy:nodeId="2293">
    <graphics x="1230.6566162109375" z="0.0" y="894.985107421875"/>
  </node>
  <node id="30055" label="WP_086935897_1" cy:nodeId="2294">
    <graphics x="49.31858825683594" z="0.0" y="887.077392578125"/>
  </node>
  <node id="30054" label="WP_094051578_2" cy:nodeId="2295">
    <graphics x="287.74951171875" z="0.0" y="1149.9200439453125"/>
  </node>
  <node id="30053" label="WP_086474256_1" cy:nodeId="2296">
    <graphics x="177.48020935058594" z="0.0" y="796.2709350585938"/>
  </node>
  <node id="30052" label="WP_093849541_5" cy:nodeId="2297">
    <graphics x="223.93276977539062" z="0.0" y="1097.83642578125"/>
  </node>
  <node id="30051" label="WP_053914084_1" cy:nodeId="2298">
    <graphics x="245.9615478515625" z="0.0" y="1169.3671875"/>
  </node>
  <node id="30050" label="WP_054567598_1" cy:nodeId="2299">
    <graphics x="52.99882507324219" z="0.0" y="810.3694458007812"/>
  </node>
  <node id="30049" label="WP_012298940_1" cy:nodeId="2300">
    <graphics x="123.27078247070312" z="0.0" y="863.4166259765625"/>
  </node>
  <node id="30048" label="KLL12571_2" cy:nodeId="2301">
    <graphics x="8.421356201171875" z="0.0" y="837.1104736328125"/>
  </node>
  <node id="30047" label="REE48080_1" cy:nodeId="2302">
    <graphics x="161.95436096191406" z="0.0" y="900.0586547851562"/>
  </node>
  <node id="30046" label="WP_085014620_4" cy:nodeId="2303">
    <graphics x="35.35611343383789" z="0.0" y="934.7567138671875"/>
  </node>
  <node id="30045" label="WP_016828012_1" cy:nodeId="2304">
    <graphics x="291.453369140625" z="0.0" y="1109.0386962890625"/>
  </node>
  <node id="30044" label="PRX97761_1" cy:nodeId="2305">
    <graphics x="298.21014404296875" z="0.0" y="1090.191650390625"/>
  </node>
  <node id="30043" label="WP_035849420_1" cy:nodeId="2306">
    <graphics x="121.47994995117188" z="0.0" y="937.2408447265625"/>
  </node>
  <node id="30042" label="WP_071042994_3" cy:nodeId="2307">
    <graphics x="620.734130859375" z="0.0" y="175.33489990234375"/>
  </node>
  <node id="30041" label="WP_072740079_1" cy:nodeId="2308">
    <graphics x="190.34228515625" z="0.0" y="1092.638916015625"/>
  </node>
  <node id="30040" label="WP_071129084_2" cy:nodeId="2309">
    <graphics x="542.3331298828125" z="0.0" y="459.29547119140625"/>
  </node>
  <node id="30039" label="WP_035849418_1" cy:nodeId="2310">
    <graphics x="172.86944580078125" z="0.0" y="894.4422607421875"/>
  </node>
  <node id="30038" label="WP_131785729_3" cy:nodeId="2311">
    <graphics x="124.4815673828125" z="0.0" y="826.1450805664062"/>
  </node>
  <node id="30037" label="OOC53575_1" cy:nodeId="2312">
    <graphics x="267.6811828613281" z="0.0" y="1109.5789794921875"/>
  </node>
  <node id="30036" label="WP_086820862_1" cy:nodeId="2313">
    <graphics x="248.9825439453125" z="0.0" y="1193.8636474609375"/>
  </node>
  <node id="30035" label="WP_079182634_1" cy:nodeId="2314">
    <graphics x="271.5836181640625" z="0.0" y="1050.36279296875"/>
  </node>
  <node id="30034" label="WP_099770571_1" cy:nodeId="2315">
    <graphics x="228.80908203125" z="0.0" y="1088.4810791015625"/>
  </node>
  <node id="30033" label="WP_084436210_2" cy:nodeId="2316">
    <graphics x="583.6505126953125" z="0.0" y="0.0"/>
  </node>
  <node id="30032" label="WP_116246828_1" cy:nodeId="2317">
    <graphics x="306.75604248046875" z="0.0" y="1081.51123046875"/>
  </node>
  <node id="30031" label="WP_091282021_2" cy:nodeId="2318">
    <graphics x="469.25531005859375" z="0.0" y="553.786865234375"/>
  </node>
  <node id="30030" label="EEZ91469_4" cy:nodeId="2319">
    <graphics x="548.982421875" z="0.0" y="567.0911865234375"/>
  </node>
  <node id="30029" label="WP_004017479_1" cy:nodeId="2320">
    <graphics x="451.9733581542969" z="0.0" y="717.6882934570312"/>
  </node>
  <node id="30028" label="GAY09001_1" cy:nodeId="2321">
    <graphics x="156.35049438476562" z="0.0" y="930.0046997070312"/>
  </node>
  <node id="30027" label="WP_124799873_3" cy:nodeId="2322">
    <graphics x="191.87510681152344" z="0.0" y="1393.4290771484375"/>
  </node>
  <node id="30026" label="WP_068920624_1" cy:nodeId="2323">
    <graphics x="71.88824462890625" z="0.0" y="1409.41455078125"/>
  </node>
  <node id="30025" label="ODV02566_1" cy:nodeId="2324">
    <graphics x="144.36566162109375" z="0.0" y="983.5549926757812"/>
  </node>
  <node id="30024" label="WP_119425883_1" cy:nodeId="2325">
    <graphics x="207.68356323242188" z="0.0" y="1071.9058837890625"/>
  </node>
  <node id="30023" label="WP_086461444_1" cy:nodeId="2326">
    <graphics x="80.00701141357422" z="0.0" y="873.5035400390625"/>
  </node>
  <node id="30022" label="WP_043809367_1" cy:nodeId="2327">
    <graphics x="130.59933471679688" z="0.0" y="878.3489379882812"/>
  </node>
  <node id="30021" label="WP_017947324_1" cy:nodeId="2328">
    <graphics x="227.2901611328125" z="0.0" y="1122.26806640625"/>
  </node>
  <node id="30020" label="KQX30631_1" cy:nodeId="2329">
    <graphics x="331.952880859375" z="0.0" y="1133.365966796875"/>
  </node>
  <node id="30019" label="WP_134028286_1" cy:nodeId="2330">
    <graphics x="184.53086853027344" z="0.0" y="1098.7996826171875"/>
  </node>
  <node id="30018" label="WP_004004118_3" cy:nodeId="2331">
    <graphics x="318.64019775390625" z="0.0" y="1158.47998046875"/>
  </node>
  <node id="30017" label="WP_010839852_1" cy:nodeId="2332">
    <graphics x="201.19383239746094" z="0.0" y="1198.66357421875"/>
  </node>
  <node id="30016" label="WP_073795746_1" cy:nodeId="2333">
    <graphics x="320.34271240234375" z="0.0" y="1026.03125"/>
  </node>
  <node id="30015" label="WP_023590616_1" cy:nodeId="2334">
    <graphics x="352.8083801269531" z="0.0" y="1123.60400390625"/>
  </node>
  <node id="30014" label="WP_078883251_1" cy:nodeId="2335">
    <graphics x="182.73397827148438" z="0.0" y="1148.2607421875"/>
  </node>
  <node id="30013" label="WP_020679164_1" cy:nodeId="2336">
    <graphics x="289.7426452636719" z="0.0" y="1130.0174560546875"/>
  </node>
  <node id="30012" label="ALM43314_1" cy:nodeId="2337">
    <graphics x="246.44052124023438" z="0.0" y="1144.91552734375"/>
  </node>
  <node id="30011" label="SNB77017_1" cy:nodeId="2338">
    <graphics x="234.37684631347656" z="0.0" y="1074.4461669921875"/>
  </node>
  <node id="30010" label="WP_084479774_1" cy:nodeId="2339">
    <graphics x="338.3255310058594" z="0.0" y="1078.93798828125"/>
  </node>
  <node id="30009" label="WP_083926711_1" cy:nodeId="2340">
    <graphics x="226.3944854736328" z="0.0" y="1081.1468505859375"/>
  </node>
  <node id="30008" label="WP_031075178_1" cy:nodeId="2341">
    <graphics x="321.78363037109375" z="0.0" y="1079.7177734375"/>
  </node>
  <node id="30007" label="WP_067478932_1" cy:nodeId="2342">
    <graphics x="177.10638427734375" z="0.0" y="1192.98095703125"/>
  </node>
  <node id="30006" label="WP_101257249_1" cy:nodeId="2343">
    <graphics x="218.13819885253906" z="0.0" y="1092.4573974609375"/>
  </node>
  <node id="30005" label="WP_021198358_1" cy:nodeId="2344">
    <graphics x="272.4515380859375" z="0.0" y="1146.1650390625"/>
  </node>
  <node id="30004" label="WP_076804070_1" cy:nodeId="2345">
    <graphics x="88.3477554321289" z="0.0" y="866.3380737304688"/>
  </node>
  <node id="30003" label="WP_131785730_3" cy:nodeId="2346">
    <graphics x="92.08609008789062" z="0.0" y="953.7634887695312"/>
  </node>
  <node id="30002" label="WP_091272829_1" cy:nodeId="2347">
    <graphics x="89.16160583496094" z="0.0" y="845.1840209960938"/>
  </node>
  <node id="30001" label="OUE26862_1" cy:nodeId="2348">
    <graphics x="54.06996154785156" z="0.0" y="857.1785888671875"/>
  </node>
  <node id="30000" label="WP_060938723_1" cy:nodeId="2349">
    <graphics x="139.855224609375" z="0.0" y="785.1867065429688"/>
  </node>
  <node id="29999" label="OQJ49465_1" cy:nodeId="2350">
    <graphics x="171.1996612548828" z="0.0" y="819.849853515625"/>
  </node>
  <node id="29998" label="WP_108913844_1" cy:nodeId="2351">
    <graphics x="0.0" z="0.0" y="872.8221435546875"/>
  </node>
  <node id="29997" label="WP_059193363_1" cy:nodeId="2352">
    <graphics x="72.11042022705078" z="0.0" y="950.3106079101562"/>
  </node>
  <node id="29996" label="WP_106248383_1" cy:nodeId="2353">
    <graphics x="267.96282958984375" z="0.0" y="1043.946533203125"/>
  </node>
  <node id="29995" label="WP_066216109_2" cy:nodeId="2354">
    <graphics x="206.4412841796875" z="0.0" y="1075.5673828125"/>
  </node>
  <node id="29994" label="WP_100387935_1" cy:nodeId="2355">
    <graphics x="558.5650634765625" z="0.0" y="284.6429748535156"/>
  </node>
  <node id="29993" label="WP_126382827_3" cy:nodeId="2356">
    <graphics x="562.5004272460938" z="0.0" y="224.70172119140625"/>
  </node>
  <node id="29992" label="WP_129171933_1" cy:nodeId="2357">
    <graphics x="480.345703125" z="0.0" y="224.39944458007812"/>
  </node>
  <node id="29991" label="WP_051268721_1" cy:nodeId="2358">
    <graphics x="538.5458984375" z="0.0" y="112.80670166015625"/>
  </node>
  <node id="29990" label="WP_005962416_1" cy:nodeId="2359">
    <graphics x="590.5253295898438" z="0.0" y="122.373779296875"/>
  </node>
  <node id="29989" label="KTS91804_1" cy:nodeId="2360">
    <graphics x="518.6691284179688" z="0.0" y="190.2127685546875"/>
  </node>
  <node id="29988" label="WP_126382826_2" cy:nodeId="2361">
    <graphics x="568.0657958984375" z="0.0" y="168.79046630859375"/>
  </node>
  <node id="29987" label="WP_122819575_1" cy:nodeId="2362">
    <graphics x="478.5412292480469" z="0.0" y="451.09356689453125"/>
  </node>
  <node id="29986" label="WP_129171932_1" cy:nodeId="2363">
    <graphics x="494.7991943359375" z="0.0" y="132.76470947265625"/>
  </node>
  <node id="29985" label="WP_071042996_4" cy:nodeId="2364">
    <graphics x="465.05303955078125" z="0.0" y="173.70458984375"/>
  </node>
  <node id="29984" label="WP_058614992_2" cy:nodeId="2365">
    <graphics x="613.1844482421875" z="0.0" y="227.67205810546875"/>
  </node>
  <node id="29983" label="WP_100387934_1" cy:nodeId="2366">
    <graphics x="510.1788330078125" z="0.0" y="278.2825622558594"/>
  </node>
  <node id="29982" label="WP_049566251_2" cy:nodeId="2367">
    <graphics x="247.45126342773438" z="0.0" y="1059.0516357421875"/>
  </node>
  <node id="29981" label="WP_056298480_2" cy:nodeId="2368">
    <graphics x="184.58123779296875" z="0.0" y="1028.968505859375"/>
  </node>
  <node id="29980" label="KZE98020_2" cy:nodeId="2369">
    <graphics x="284.06927490234375" z="0.0" y="1060.4342041015625"/>
  </node>
  <node id="29979" label="WP_083193763_1" cy:nodeId="2370">
    <graphics x="169.83941650390625" z="0.0" y="1090.869140625"/>
  </node>
  <node id="29978" label="WP_030584801_1" cy:nodeId="2371">
    <graphics x="237.306640625" z="0.0" y="1077.12109375"/>
  </node>
  <node id="29977" label="WP_050723163_1" cy:nodeId="2372">
    <graphics x="191.6669464111328" z="0.0" y="1116.4913330078125"/>
  </node>
  <node id="29976" label="WP_031131024_1" cy:nodeId="2373">
    <graphics x="270.482421875" z="0.0" y="1110.7135009765625"/>
  </node>
  <node id="29975" label="WP_030546164_1" cy:nodeId="2374">
    <graphics x="213.55819702148438" z="0.0" y="1080.812255859375"/>
  </node>
  <node id="29974" label="WP_043497828_1" cy:nodeId="2375">
    <graphics x="238.47161865234375" z="0.0" y="1052.412109375"/>
  </node>
  <node id="29973" label="WP_083609312_1" cy:nodeId="2376">
    <graphics x="222.76255798339844" z="0.0" y="1150.1463623046875"/>
  </node>
  <node id="29972" label="PYE15898_1" cy:nodeId="2377">
    <graphics x="195.9170379638672" z="0.0" y="1155.1268310546875"/>
  </node>
  <node id="29971" label="WP_030081850_1" cy:nodeId="2378">
    <graphics x="197.14715576171875" z="0.0" y="1142.1241455078125"/>
  </node>
  <node id="29970" label="WP_084990460_1" cy:nodeId="2379">
    <graphics x="202.25582885742188" z="0.0" y="1072.30126953125"/>
  </node>
  <node id="29969" label="WP_073939680_1" cy:nodeId="2380">
    <graphics x="311.88214111328125" z="0.0" y="1144.5965576171875"/>
  </node>
  <node id="29968" label="PXY26195_1" cy:nodeId="2381">
    <graphics x="251.18975830078125" z="0.0" y="1073.9434814453125"/>
  </node>
  <node id="29967" label="ETD31629_2" cy:nodeId="2382">
    <graphics x="263.7584228515625" z="0.0" y="1179.65771484375"/>
  </node>
  <node id="29966" label="ALE78105_1" cy:nodeId="2383">
    <graphics x="200.42108154296875" z="0.0" y="1069.262451171875"/>
  </node>
  <node id="29965" label="WP_130474521_1" cy:nodeId="2384">
    <graphics x="163.472412109375" z="0.0" y="969.9722290039062"/>
  </node>
  <node id="29964" label="REE48079_1" cy:nodeId="2385">
    <graphics x="104.21869659423828" z="0.0" y="874.7540283203125"/>
  </node>
  <node id="29963" label="WP_098957614_1" cy:nodeId="2386">
    <graphics x="94.1457748413086" z="0.0" y="923.3330078125"/>
  </node>
  <node id="29962" label="WP_116055407_1" cy:nodeId="2387">
    <graphics x="67.12748718261719" z="0.0" y="960.7948608398438"/>
  </node>
  <node id="29961" label="WP_086461443_1" cy:nodeId="2388">
    <graphics x="58.980010986328125" z="0.0" y="841.7267456054688"/>
  </node>
  <node id="29960" label="WP_089245620_1" cy:nodeId="2389">
    <graphics x="220.23580932617188" z="0.0" y="1026.3978271484375"/>
  </node>
  <node id="29959" label="WP_098957465_1" cy:nodeId="2390">
    <graphics x="148.39596557617188" z="0.0" y="965.786865234375"/>
  </node>
  <node id="29958" label="WP_086474257_1" cy:nodeId="2391">
    <graphics x="118.95674133300781" z="0.0" y="825.650634765625"/>
  </node>
  <node id="29957" label="WP_075831737_2" cy:nodeId="2392">
    <graphics x="181.99505615234375" z="0.0" y="862.9774169921875"/>
  </node>
  <node id="29956" label="SMQ71228_1" cy:nodeId="2393">
    <graphics x="97.62635803222656" z="0.0" y="790.0634155273438"/>
  </node>
  <node id="29955" label="OUE27580_1" cy:nodeId="2394">
    <graphics x="139.20968627929688" z="0.0" y="835.194091796875"/>
  </node>
  <node id="29954" label="WP_048317341_1" cy:nodeId="2395">
    <graphics x="172.23147583007812" z="0.0" y="933.069091796875"/>
  </node>
  <node id="29953" label="CAQ01680_1" cy:nodeId="2396">
    <graphics x="45.67491149902344" z="0.0" y="930.97314453125"/>
  </node>
  <node id="29952" label="WP_076843254_1" cy:nodeId="2397">
    <graphics x="184.24717712402344" z="0.0" y="901.39111328125"/>
  </node>
  <node id="29951" label="WP_094130179_1" cy:nodeId="2398">
    <graphics x="132.7313232421875" z="0.0" y="926.6746826171875"/>
  </node>
  <node id="29950" label="WP_104343124_1" cy:nodeId="2399">
    <graphics x="68.90917205810547" z="0.0" y="975.3031005859375"/>
  </node>
  <node id="29949" label="WP_086522342_1" cy:nodeId="2400">
    <graphics x="172.71841430664062" z="0.0" y="891.6129150390625"/>
  </node>
  <node id="29948" label="WP_124566916_1" cy:nodeId="2401">
    <graphics x="146.30636596679688" z="0.0" y="922.4578857421875"/>
  </node>
  <node id="29947" label="WP_131626374_1" cy:nodeId="2402">
    <graphics x="82.61209106445312" z="0.0" y="809.5241088867188"/>
  </node>
  <node id="29946" label="WP_007536321_1" cy:nodeId="2403">
    <graphics x="119.73463439941406" z="0.0" y="799.085205078125"/>
  </node>
  <node id="29945" label="KUN25245_1" cy:nodeId="2404">
    <graphics x="35.60904312133789" z="0.0" y="896.6429443359375"/>
  </node>
  <node id="29944" label="WP_052129072_1" cy:nodeId="2405">
    <graphics x="112.504638671875" z="0.0" y="858.6187133789062"/>
  </node>
  <node id="29943" label="WP_086516539_1" cy:nodeId="2406">
    <graphics x="138.94613647460938" z="0.0" y="834.645751953125"/>
  </node>
  <node id="29942" label="WP_124003633_1" cy:nodeId="2407">
    <graphics x="84.05226135253906" z="0.0" y="928.2501831054688"/>
  </node>
  <node id="29941" label="WP_124003201_1" cy:nodeId="2408">
    <graphics x="193.84744262695312" z="0.0" y="854.8543701171875"/>
  </node>
  <node id="29940" label="EME16460_1" cy:nodeId="2409">
    <graphics x="138.1240234375" z="0.0" y="763.8335571289062"/>
  </node>
  <node id="29939" label="WP_080909325_1" cy:nodeId="2410">
    <graphics x="19.392974853515625" z="0.0" y="853.1773681640625"/>
  </node>
  <node id="29938" label="WP_086516540_1" cy:nodeId="2411">
    <graphics x="58.65132141113281" z="0.0" y="811.47705078125"/>
  </node>
  <node id="29937" label="WP_104290301_1" cy:nodeId="2412">
    <graphics x="189.31021118164062" z="0.0" y="825.78173828125"/>
  </node>
  <node id="29936" label="OUE18681_1" cy:nodeId="2413">
    <graphics x="202.55972290039062" z="0.0" y="900.5299072265625"/>
  </node>
  <node id="29935" label="WP_076843253_1" cy:nodeId="2414">
    <graphics x="106.54253387451172" z="0.0" y="966.4402465820312"/>
  </node>
  <node id="29934" label="WP_091272827_1" cy:nodeId="2415">
    <graphics x="82.61941528320312" z="0.0" y="813.7159423828125"/>
  </node>
  <node id="29933" label="WP_084523472_1" cy:nodeId="2416">
    <graphics x="146.5394287109375" z="0.0" y="950.6998901367188"/>
  </node>
  <node id="29932" label="GCB53695_1" cy:nodeId="2417">
    <graphics x="159.62564086914062" z="0.0" y="874.5416870117188"/>
  </node>
  <node id="29931" label="WP_081557171_1" cy:nodeId="2418">
    <graphics x="188.4478759765625" z="0.0" y="825.6813354492188"/>
  </node>
  <node id="29930" label="WP_084011357_1" cy:nodeId="2419">
    <graphics x="53.635841369628906" z="0.0" y="804.4321899414062"/>
  </node>
  <node id="29929" label="WP_080754833_1" cy:nodeId="2420">
    <graphics x="83.91249084472656" z="0.0" y="899.1926879882812"/>
  </node>
  <node id="29928" label="WP_045877303_1" cy:nodeId="2421">
    <graphics x="84.4344482421875" z="0.0" y="819.6923828125"/>
  </node>
  <node id="29927" label="WP_086513414_1" cy:nodeId="2422">
    <graphics x="86.19720458984375" z="0.0" y="876.116943359375"/>
  </node>
  <node id="29926" label="WP_048316860_1" cy:nodeId="2423">
    <graphics x="134.50991821289062" z="0.0" y="780.8057250976562"/>
  </node>
  <node id="29925" label="WP_124566915_2" cy:nodeId="2424">
    <graphics x="64.4305191040039" z="0.0" y="840.03125"/>
  </node>
  <node id="29924" label="WP_082509526_1" cy:nodeId="2425">
    <graphics x="125.75885009765625" z="0.0" y="897.08447265625"/>
  </node>
  <node id="29923" label="WP_104343125_1" cy:nodeId="2426">
    <graphics x="126.35382080078125" z="0.0" y="917.8847045898438"/>
  </node>
  <node id="29922" label="WP_086513413_1" cy:nodeId="2427">
    <graphics x="63.903282165527344" z="0.0" y="907.4126586914062"/>
  </node>
  <node id="29921" label="WP_085014622_6" cy:nodeId="2428">
    <graphics x="35.67463684082031" z="0.0" y="832.9554443359375"/>
  </node>
  <node id="29920" label="WP_067823333_1" cy:nodeId="2429">
    <graphics x="83.6563491821289" z="0.0" y="959.5826416015625"/>
  </node>
  <node id="29919" label="WP_079054543_1" cy:nodeId="2430">
    <graphics x="157.51544189453125" z="0.0" y="845.2554321289062"/>
  </node>
  <node id="29918" label="WP_134789214_1" cy:nodeId="2431">
    <graphics x="167.1133270263672" z="0.0" y="896.9754028320312"/>
  </node>
  <node id="29917" label="RPE52214_1" cy:nodeId="2432">
    <graphics x="35.48805236816406" z="0.0" y="924.2171020507812"/>
  </node>
  <node id="29916" label="WP_131626375_1" cy:nodeId="2433">
    <graphics x="212.24533081054688" z="0.0" y="859.526123046875"/>
  </node>
  <node id="29915" label="OUE27579_1" cy:nodeId="2434">
    <graphics x="169.490966796875" z="0.0" y="820.7208251953125"/>
  </node>
  <node id="29914" label="WP_055938416_1" cy:nodeId="2435">
    <graphics x="214.1148681640625" z="0.0" y="854.11669921875"/>
  </node>
  <node id="29913" label="WP_080909324_2" cy:nodeId="2436">
    <graphics x="144.857177734375" z="0.0" y="922.3316040039062"/>
  </node>
  <node id="29912" label="WP_076824657_1" cy:nodeId="2437">
    <graphics x="38.81446838378906" z="0.0" y="786.7279663085938"/>
  </node>
  <node id="29911" label="OQJ63784_1" cy:nodeId="2438">
    <graphics x="124.95268249511719" z="0.0" y="859.3650512695312"/>
  </node>
  <node id="29910" label="WP_107120384_1" cy:nodeId="2439">
    <graphics x="46.98603057861328" z="0.0" y="869.1033935546875"/>
  </node>
  <node id="29909" label="WP_043591397_1" cy:nodeId="2440">
    <graphics x="9.965248107910156" z="0.0" y="892.8865966796875"/>
  </node>
  <node id="29908" label="WP_130474520_1" cy:nodeId="2441">
    <graphics x="188.77468872070312" z="0.0" y="967.8839111328125"/>
  </node>
  <node id="29907" label="KQR86552_1" cy:nodeId="2442">
    <graphics x="41.25362014770508" z="0.0" y="935.455322265625"/>
  </node>
  <node id="29906" label="WP_112271410_1" cy:nodeId="2443">
    <graphics x="257.9617004394531" z="0.0" y="1092.33642578125"/>
  </node>
  <node id="29905" label="WP_083472659_1" cy:nodeId="2444">
    <graphics x="264.50091552734375" z="0.0" y="1145.3212890625"/>
  </node>
  <node id="29904" label="WP_033318793_2" cy:nodeId="2445">
    <graphics x="241.83013916015625" z="0.0" y="1100.0789794921875"/>
  </node>
  <node id="29903" label="WP_030701973_1" cy:nodeId="2446">
    <graphics x="209.24423217773438" z="0.0" y="1149.8555908203125"/>
  </node>
  <node id="29902" label="WP_010048307_1" cy:nodeId="2447">
    <graphics x="222.57778930664062" z="0.0" y="1140.58642578125"/>
  </node>
  <node id="29901" label="CEL19833_1" cy:nodeId="2448">
    <graphics x="276.58770751953125" z="0.0" y="1157.7550048828125"/>
  </node>
  <node id="29900" label="WP_125509413_1" cy:nodeId="2449">
    <graphics x="162.73257446289062" z="0.0" y="1128.7900390625"/>
  </node>
  <node id="29899" label="OKI46856_1" cy:nodeId="2450">
    <graphics x="231.743408203125" z="0.0" y="1218.902099609375"/>
  </node>
  <node id="29898" label="WP_070343622_1" cy:nodeId="2451">
    <graphics x="281.16607666015625" z="0.0" y="1057.7237548828125"/>
  </node>
  <node id="29897" label="WP_016691947_2" cy:nodeId="2452">
    <graphics x="229.03909301757812" z="0.0" y="1141.861572265625"/>
  </node>
  <node id="29896" label="WP_028327189_1" cy:nodeId="2453">
    <graphics x="263.6047668457031" z="0.0" y="1084.8599853515625"/>
  </node>
  <node id="29895" label="WP_077689962_1" cy:nodeId="2454">
    <graphics x="284.4908447265625" z="0.0" y="1012.9541015625"/>
  </node>
  <node id="29894" label="WP_043461231_1" cy:nodeId="2455">
    <graphics x="300.58135986328125" z="0.0" y="1203.2239990234375"/>
  </node>
  <node id="29893" label="WP_132929859_1" cy:nodeId="2456">
    <graphics x="213.42257690429688" z="0.0" y="1075.8291015625"/>
  </node>
  <node id="29892" label="WP_081663146_1" cy:nodeId="2457">
    <graphics x="253.0098876953125" z="0.0" y="1179.212890625"/>
  </node>
  <node id="29891" label="WP_042167067_1" cy:nodeId="2458">
    <graphics x="344.8187255859375" z="0.0" y="1182.644775390625"/>
  </node>
  <node id="29890" label="WP_066976558_1" cy:nodeId="2459">
    <graphics x="257.7044982910156" z="0.0" y="1185.0318603515625"/>
  </node>
  <node id="29889" label="WP_052852666_2" cy:nodeId="2460">
    <graphics x="284.5655212402344" z="0.0" y="1112.16455078125"/>
  </node>
  <node id="29888" label="WP_048574296_1" cy:nodeId="2461">
    <graphics x="292.5862121582031" z="0.0" y="1046.933837890625"/>
  </node>
  <node id="29887" label="WP_105527259_1" cy:nodeId="2462">
    <graphics x="277.24334716796875" z="0.0" y="1078.061279296875"/>
  </node>
  <node id="29886" label="WP_093655900_5" cy:nodeId="2463">
    <graphics x="320.8250427246094" z="0.0" y="1118.6103515625"/>
  </node>
  <node id="29885" label="WP_062924764_1" cy:nodeId="2464">
    <graphics x="273.04730224609375" z="0.0" y="1059.1075439453125"/>
  </node>
  <node id="29884" label="WP_030143818_1" cy:nodeId="2465">
    <graphics x="247.55950927734375" z="0.0" y="1162.2386474609375"/>
  </node>
  <node id="29883" label="WP_111250567_1" cy:nodeId="2466">
    <graphics x="326.38116455078125" z="0.0" y="1091.46142578125"/>
  </node>
  <node id="29882" label="SED75494_1" cy:nodeId="2467">
    <graphics x="233.8742218017578" z="0.0" y="1130.7939453125"/>
  </node>
  <node id="29881" label="WP_109186559_1" cy:nodeId="2468">
    <graphics x="239.85415649414062" z="0.0" y="1105.5628662109375"/>
  </node>
  <node id="29880" label="WP_105722094_1" cy:nodeId="2469">
    <graphics x="302.33050537109375" z="0.0" y="1151.199951171875"/>
  </node>
  <node id="29879" label="WP_058915320_1" cy:nodeId="2470">
    <graphics x="247.16485595703125" z="0.0" y="1197.2469482421875"/>
  </node>
  <node id="29878" label="WP_121007506_1" cy:nodeId="2471">
    <graphics x="268.6873779296875" z="0.0" y="1065.621826171875"/>
  </node>
  <node id="29877" label="WP_055689909_1" cy:nodeId="2472">
    <graphics x="291.83135986328125" z="0.0" y="1152.8740234375"/>
  </node>
  <node id="29876" label="WP_006501818_1" cy:nodeId="2473">
    <graphics x="292.12310791015625" z="0.0" y="1148.283447265625"/>
  </node>
  <node id="29875" label="WP_015100718_1" cy:nodeId="2474">
    <graphics x="327.5793151855469" z="0.0" y="1097.3333740234375"/>
  </node>
  <node id="29874" label="ALC19908_1" cy:nodeId="2475">
    <graphics x="300.03424072265625" z="0.0" y="1039.904052734375"/>
  </node>
  <node id="29873" label="WP_031002210_2" cy:nodeId="2476">
    <graphics x="286.42999267578125" z="0.0" y="1183.8756103515625"/>
  </node>
  <node id="29872" label="WP_116112318_1" cy:nodeId="2477">
    <graphics x="240.42324829101562" z="0.0" y="1015.52734375"/>
  </node>
  <node id="29871" label="WP_008409979_1" cy:nodeId="2478">
    <graphics x="244.80068969726562" z="0.0" y="1159.608642578125"/>
  </node>
  <node id="29870" label="WP_059008183_2" cy:nodeId="2479">
    <graphics x="294.46392822265625" z="0.0" y="1119.14306640625"/>
  </node>
  <node id="29869" label="WP_078612341_1" cy:nodeId="2480">
    <graphics x="313.87359619140625" z="0.0" y="1104.5557861328125"/>
  </node>
  <node id="29868" label="WP_058632033_1" cy:nodeId="2481">
    <graphics x="255.32510375976562" z="0.0" y="1131.23046875"/>
  </node>
  <node id="29867" label="WP_033300563_1" cy:nodeId="2482">
    <graphics x="217.9154510498047" z="0.0" y="1217.064697265625"/>
  </node>
  <node id="29866" label="WP_103467468_1" cy:nodeId="2483">
    <graphics x="177.16964721679688" z="0.0" y="1115.25927734375"/>
  </node>
  <node id="29865" label="SJZ81173_1" cy:nodeId="2484">
    <graphics x="286.120361328125" z="0.0" y="1170.65478515625"/>
  </node>
  <node id="29864" label="WP_084252732_3" cy:nodeId="2485">
    <graphics x="304.2978210449219" z="0.0" y="1159.39453125"/>
  </node>
  <node id="29863" label="KKI16967_3" cy:nodeId="2486">
    <graphics x="294.47711181640625" z="0.0" y="1056.6109619140625"/>
  </node>
  <node id="29862" label="WP_109162285_1" cy:nodeId="2487">
    <graphics x="300.79541015625" z="0.0" y="1062.52392578125"/>
  </node>
  <node id="29861" label="WP_083753877_2" cy:nodeId="2488">
    <graphics x="260.96771240234375" z="0.0" y="1096.7144775390625"/>
  </node>
  <node id="29860" label="PXY18584_1" cy:nodeId="2489">
    <graphics x="303.5957336425781" z="0.0" y="1046.7789306640625"/>
  </node>
  <node id="29859" label="WP_097634704_1" cy:nodeId="2490">
    <graphics x="196.01849365234375" z="0.0" y="1128.9896240234375"/>
  </node>
  <node id="29858" label="RLV71217_1" cy:nodeId="2491">
    <graphics x="324.24835205078125" z="0.0" y="1051.731689453125"/>
  </node>
  <node id="29857" label="WP_095752644_1" cy:nodeId="2492">
    <graphics x="293.01971435546875" z="0.0" y="1066.4906005859375"/>
  </node>
  <node id="29856" label="WP_113689373_1" cy:nodeId="2493">
    <graphics x="222.78623962402344" z="0.0" y="1175.0291748046875"/>
  </node>
  <node id="29855" label="OKJ27000_1" cy:nodeId="2494">
    <graphics x="227.95965576171875" z="0.0" y="1167.702880859375"/>
  </node>
  <node id="29854" label="OLO29347_1" cy:nodeId="2495">
    <graphics x="322.9815673828125" z="0.0" y="1053.3603515625"/>
  </node>
  <node id="29853" label="WP_123813761_1" cy:nodeId="2496">
    <graphics x="249.76034545898438" z="0.0" y="1017.943359375"/>
  </node>
  <node id="29852" label="WP_075846085_2" cy:nodeId="2497">
    <graphics x="257.463134765625" z="0.0" y="1098.9442138671875"/>
  </node>
  <node id="29851" label="KWX01007_1" cy:nodeId="2498">
    <graphics x="208.477294921875" z="0.0" y="1162.76953125"/>
  </node>
  <node id="29850" label="WP_018847808_1" cy:nodeId="2499">
    <graphics x="316.8445739746094" z="0.0" y="1137.39794921875"/>
  </node>
  <node id="29849" label="WP_029987712_1" cy:nodeId="2500">
    <graphics x="310.2237548828125" z="0.0" y="1083.18212890625"/>
  </node>
  <node id="29848" label="OQO95173_1" cy:nodeId="2501">
    <graphics x="174.06149291992188" z="0.0" y="1066.46630859375"/>
  </node>
  <node id="29847" label="WP_087767686_1" cy:nodeId="2502">
    <graphics x="304.19024658203125" z="0.0" y="1144.2720947265625"/>
  </node>
  <node id="29846" label="WP_071934999_2" cy:nodeId="2503">
    <graphics x="183.02072143554688" z="0.0" y="1100.534912109375"/>
  </node>
  <node id="29845" label="OKI12399_1" cy:nodeId="2504">
    <graphics x="349.7868957519531" z="0.0" y="1090.8983154296875"/>
  </node>
  <node id="29844" label="WP_093355673_1" cy:nodeId="2505">
    <graphics x="254.73858642578125" z="0.0" y="1031.84716796875"/>
  </node>
  <node id="29843" label="WP_103530696_1" cy:nodeId="2506">
    <graphics x="296.6096496582031" z="0.0" y="1136.87353515625"/>
  </node>
  <node id="29842" label="WP_053556805_1" cy:nodeId="2507">
    <graphics x="337.4708251953125" z="0.0" y="1078.552001953125"/>
  </node>
  <node id="29841" label="WP_073815370_1" cy:nodeId="2508">
    <graphics x="326.62652587890625" z="0.0" y="1155.32421875"/>
  </node>
  <node id="29840" label="WP_078760898_1" cy:nodeId="2509">
    <graphics x="230.7914276123047" z="0.0" y="1077.07958984375"/>
  </node>
  <node id="29839" label="WP_093766414_4" cy:nodeId="2510">
    <graphics x="262.2779235839844" z="0.0" y="1187.19482421875"/>
  </node>
  <node id="29838" label="WP_114400345_1" cy:nodeId="2511">
    <graphics x="226.88809204101562" z="0.0" y="1185.5362548828125"/>
  </node>
  <node id="29837" label="WP_055421506_1" cy:nodeId="2512">
    <graphics x="331.04730224609375" z="0.0" y="1024.476318359375"/>
  </node>
  <node id="29836" label="WP_064722319_1" cy:nodeId="2513">
    <graphics x="341.3838195800781" z="0.0" y="1147.46533203125"/>
  </node>
  <node id="29835" label="WP_017558654_2" cy:nodeId="2514">
    <graphics x="152.51217651367188" z="0.0" y="1131.2412109375"/>
  </node>
  <node id="29834" label="WP_061787600_2" cy:nodeId="2515">
    <graphics x="282.0085144042969" z="0.0" y="1237.51025390625"/>
  </node>
  <node id="29833" label="WP_037939130_1" cy:nodeId="2516">
    <graphics x="214.30616760253906" z="0.0" y="1135.5765380859375"/>
  </node>
  <node id="29832" label="WP_110470681_1" cy:nodeId="2517">
    <graphics x="313.3087463378906" z="0.0" y="1145.189697265625"/>
  </node>
  <node id="29831" label="WP_089597075_1" cy:nodeId="2518">
    <graphics x="297.03863525390625" z="0.0" y="1096.7672119140625"/>
  </node>
  <node id="29830" label="WP_073770697_1" cy:nodeId="2519">
    <graphics x="215.980712890625" z="0.0" y="1142.108154296875"/>
  </node>
  <node id="29829" label="WP_038682890_3" cy:nodeId="2520">
    <graphics x="240.73947143554688" z="0.0" y="1019.3023681640625"/>
  </node>
  <node id="29828" label="WP_045196822_2" cy:nodeId="2521">
    <graphics x="360.6122131347656" z="0.0" y="1101.1539306640625"/>
  </node>
  <node id="29827" label="WP_015613007_1" cy:nodeId="2522">
    <graphics x="184.7571258544922" z="0.0" y="1160.885986328125"/>
  </node>
  <node id="29826" label="WP_017594221_1" cy:nodeId="2523">
    <graphics x="295.64971923828125" z="0.0" y="1157.66796875"/>
  </node>
  <node id="29825" label="WP_105672644_2" cy:nodeId="2524">
    <graphics x="253.07351684570312" z="0.0" y="1059.21240234375"/>
  </node>
  <node id="29824" label="WP_083467034_1" cy:nodeId="2525">
    <graphics x="225.58401489257812" z="0.0" y="1052.031005859375"/>
  </node>
  <node id="29823" label="WP_094931980_2" cy:nodeId="2526">
    <graphics x="363.5571594238281" z="0.0" y="1179.453125"/>
  </node>
  <node id="29822" label="WP_006350677_1" cy:nodeId="2527">
    <graphics x="284.612060546875" z="0.0" y="1205.050048828125"/>
  </node>
  <node id="29821" label="WP_084752844_1" cy:nodeId="2528">
    <graphics x="187.64378356933594" z="0.0" y="1054.2496337890625"/>
  </node>
  <node id="29820" label="WP_130451801_3" cy:nodeId="2529">
    <graphics x="258.4831848144531" z="0.0" y="1212.047119140625"/>
  </node>
  <node id="29819" label="WP_110343524_1" cy:nodeId="2530">
    <graphics x="198.99041748046875" z="0.0" y="1106.1328125"/>
  </node>
  <node id="29818" label="WP_017627596_1" cy:nodeId="2531">
    <graphics x="164.21937561035156" z="0.0" y="1141.683837890625"/>
  </node>
  <node id="29817" label="WP_027743449_4" cy:nodeId="2532">
    <graphics x="285.88970947265625" z="0.0" y="1080.269287109375"/>
  </node>
  <node id="29816" label="WP_067284698_3" cy:nodeId="2533">
    <graphics x="286.9316101074219" z="0.0" y="1005.2930908203125"/>
  </node>
  <node id="29815" label="WP_089118023_1" cy:nodeId="2534">
    <graphics x="205.25457763671875" z="0.0" y="1114.8751220703125"/>
  </node>
  <node id="29814" label="EHM27670_1" cy:nodeId="2535">
    <graphics x="290.4740905761719" z="0.0" y="1095.4676513671875"/>
  </node>
  <node id="29813" label="WP_129802804_1" cy:nodeId="2536">
    <graphics x="182.9744873046875" z="0.0" y="1066.5706787109375"/>
  </node>
  <node id="29812" label="WP_116951408_3" cy:nodeId="2537">
    <graphics x="252.23809814453125" z="0.0" y="1074.952392578125"/>
  </node>
  <node id="29811" label="RPK87717_1" cy:nodeId="2538">
    <graphics x="360.4691467285156" z="0.0" y="1134.2471923828125"/>
  </node>
  <node id="29810" label="WP_053623192_1" cy:nodeId="2539">
    <graphics x="222.5222930908203" z="0.0" y="1009.96630859375"/>
  </node>
  <node id="29809" label="WP_073876556_1" cy:nodeId="2540">
    <graphics x="332.0513916015625" z="0.0" y="1101.729736328125"/>
  </node>
  <node id="29808" label="WP_081907113_1" cy:nodeId="2541">
    <graphics x="326.16363525390625" z="0.0" y="1186.55859375"/>
  </node>
  <node id="29807" label="WP_107004474_1" cy:nodeId="2542">
    <graphics x="215.84376525878906" z="0.0" y="1117.2376708984375"/>
  </node>
  <node id="29806" label="WP_121830363_1" cy:nodeId="2543">
    <graphics x="364.5825500488281" z="0.0" y="1096.0751953125"/>
  </node>
  <node id="29805" label="ALG08515_1" cy:nodeId="2544">
    <graphics x="210.41192626953125" z="0.0" y="1183.70263671875"/>
  </node>
  <node id="29804" label="WP_115920406_2" cy:nodeId="2545">
    <graphics x="325.11956787109375" z="0.0" y="1161.44287109375"/>
  </node>
  <node id="29803" label="WP_090858762_1" cy:nodeId="2546">
    <graphics x="304.65130615234375" z="0.0" y="1112.993896484375"/>
  </node>
  <node id="29802" label="WP_096287923_1" cy:nodeId="2547">
    <graphics x="330.2403869628906" z="0.0" y="1048.298095703125"/>
  </node>
  <node id="29801" label="WP_081761968_1" cy:nodeId="2548">
    <graphics x="218.79644775390625" z="0.0" y="1053.742919921875"/>
  </node>
  <node id="29800" label="WP_125937921_2" cy:nodeId="2549">
    <graphics x="275.30303955078125" z="0.0" y="1031.4208984375"/>
  </node>
  <node id="29799" label="WP_055876321_1" cy:nodeId="2550">
    <graphics x="240.7449951171875" z="0.0" y="1080.718017578125"/>
  </node>
  <node id="29798" label="WP_086780456_1" cy:nodeId="2551">
    <graphics x="311.2030944824219" z="0.0" y="1210.1885986328125"/>
  </node>
  <node id="29797" label="ONI75210_2" cy:nodeId="2552">
    <graphics x="172.23025512695312" z="0.0" y="1119.2994384765625"/>
  </node>
  <node id="29796" label="WP_040271779_1" cy:nodeId="2553">
    <graphics x="322.89141845703125" z="0.0" y="1109.9620361328125"/>
  </node>
</graph>
